# Supplementary material for: Are spodium bonds directional?
Source: Royal Society of Chemistry journal article supplement (doi:10.1039/d4cc05789a), 2024-12-05
Supplement: d4cc05789a1.pdf [file d4cc05789a1.pdf]

## Supplementary Information

# Are spodium bonds directional?

Velina R. Boro, Binoy K. Saha\* and Gurudosguptha Rangazhvar

### Contents

Experimental: CSD search, cone correction, distance-cone correction, computation.

Figure S1. Figures of the dimers obtained from crystal structure and from fully optimized dimer and monomer.

Table S1. Comparison of geometrical parameters among the dimer obtained from crystal structure and dimer and monomer obtained from fully optimized geometry.

Table S2. Data for % population vs  $\angle Y-Sp \cdots LB$  angle for the  $Y_4Sp \cdots LB$  interactions before cone correction.

- (a)  $Y_4Zn \cdots LB$  Interaction
- (b)  $Y_4Cd \cdots LB$  Interaction
- (c)  $Y_4Hg \cdots LB$  Interaction

Table S3. Data for % population vs  $\angle Y-Sp \cdots LB$  angle for the  $Y_4Sp \cdots LB$  interactions after cone correction.

- (a)  $Y_4Zn \cdots LB$  Interaction
- (b)  $Y_4Cd \cdots LB$  Interaction
- (c)  $Y_4Hg \cdots LB$  Interaction

Table S4. Data for % population vs  $\angle Y-Sp \cdots LB$  angle for the  $Y_5Sp \cdots LB$  interactions before cone correction.

- (a)  $Y_5Zn \cdots LB$  Interaction.
- (b)  $Y_5Cd \cdots LB$  Interaction.
- (c)  $Y_5Hg \cdots LB$  Interaction.

Table S5. Data for % population vs  $\angle Y-Sp \cdots LB$  angle for the  $Y_5Sp \cdots LB$  interactions after cone correction.

- (a)  $Y_5Zn \cdots LB$  Interaction.
- (b)  $Y_5Cd \cdots LB$  Interaction.
- (c)  $Y_5Hg \cdots LB$  Interaction.

Table S6. Data for the 3D plot of % population density at different  $Zn \cdots O$  distances and  $\angle Y-Zn \cdots O$  angles for the  $Y_5Zn \cdots O$  complexes used for distance-cone correction.

- (a) Number of hits (n) at different  $Zn \cdots O$  distance and  $\angle Y-Zn \cdots O$  angle ranges before distance-cone correction.
- (b) % of hits before distance-cone correction.
- (c) Volume of the rings (v) for different distance and angle ranges.
- (d) Distance-cone corrected population = Density of the populations for each ring = Number of hits/Volume of the rings (n/v) for different distance and angle ranges.

- (e) Distance-cone corrected % population (% of the population density of the rings for different distance and angle ranges).

Table S7. Refcodes for the cone and distance-cone corrections.

- (a) Refcodes,  $\angle Y-Zn \cdots LB$  angles and the interacting LB atoms for the cone correction of the  $CdY_5 \cdots LB$  systems.
- (b) Refcodes,  $\angle Y-Cd \cdots LB$  angles and the interacting LB atoms for the cone correction of the  $CdY_5 \cdots LB$  systems.
- (c) Refcodes,  $\angle Y-Hg \cdots LB$  angles and the interacting LB atoms for the cone correction of the  $CdY_5 \cdots LB$  systems.
- (d) Refcodes,  $\angle Y-Zn \cdots O$  angles and  $Zn \cdots O$  distances ( $d_{ZnO}$ ) for the distance-cone correction of  $ZnY_5 \cdots O$  systems.

## Experimental

**CSD search:** Statistical analyses have been performed on the spodium bonds between different Lewis bases and four- and five-coordinated spodium ions (Zn, Cd, and Hg). For the four coordinated spodium complexes, the data were taken from the work reported by Bauzá *et al.*<sup>2</sup>. The van der Waals radii for the spodium atoms were used as reported by Hu and Robertson.<sup>11</sup> The interacting LB was N, P, As, O, S, Se, Te, F, Cl, Br, I, or At.

For the spodium bonds in the crystal structures of penta-coordinated spodium complexes, CSD version 5.44, April 2023, has been searched. The distance criteria used was within the van der Waals sum of the spodium atom and the interacting LB atom + 1.5 Å and the interacting LB was N, P, As, O, S, Se, Te, F, Cl, Br, I, or At, similar to the study of Gomila *et al.*<sup>9</sup> The other search criteria were 3D coordinates available, R-factor within 10%, and only single crystal data were used in the analysis. Among the five available  $\angle Y-Sp \cdots LB$  (Y is any element) angles in each interaction, the highest angle has been considered for the analysis.

**Cone correction:** There are two parameters, one is chemical and another is geometrical, that determine the probability of finding LB at a particular  $\angle Y-Sp \cdots LB$  ( $\theta$ ). As the angle  $\angle Y-Sp \cdots LB$  increases, the circle size, on which the interacting LB is residing, decreases (see the figure below). As a result, the probability of finding of LB on a circle at higher  $\theta$  decreases which is purely based on geometrical reason. Therefore, to study the chemical effect of the interaction, it is important to nullify the geometrical bias for the angle. The size of the circle is proportional to  $\sin\theta$  and hence the population distribution can be normalized with respect the angle  $\theta$  by dividing the population of LB with  $\angle Y-Sp \cdots LB = \theta$  by  $\sin\theta$ . It is done as follows.

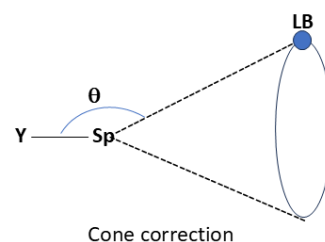

Number of data (n) was counted for each  $\angle Y-Sp \cdots LB$  angle range of  $(155 + 10m) \pm 5$  where  $m = 0, 1, 2$  for four-coordinated systems and  $(95 + 10w) \pm 5$  where  $w = 0, 1, 2, \dots, 8$  for five-coordinated systems. The cone-corrected population is calculated as  $n/\sin(155 + 10n)$  for four-coordinated systems and  $n/\sin(95 + 10w)$  for five-coordinated systems.

**Distance-cone correction:** It is similar to the cone correction except that apart from the angle, here the distance is also taken into account. The entire space around Zn can be segmented into several rings confined within the angle and distance ranges  $\theta_1 \rightarrow \theta_2$  and  $r_1 \rightarrow r_2$  respectively. One such ring is shown in the figure below. The volume of this ring increases if the  $\theta_1$  and  $\theta_2$  angles are smaller and/or  $r_1$  and  $r_2$  distances are longer. Based on purely geometric reason, the probability of finding LB within the ring increase as the ring volume increases. Therefore, this geometric bias should be nullified to get the chemical effect of the interaction geometry. This is done by calculating the population density of LB within these rings. The procedure is shown below.

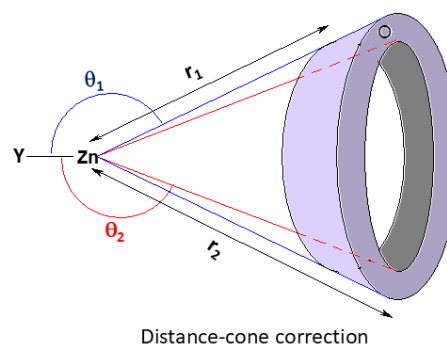

If  $N_{\theta_1\theta_2,r_1r_2}$  is the number of O atoms present within the volume of space  $V_{\theta_1\theta_2,r_1r_2}$  (shown as a ring in the above figure) around  $Zn(-Y)$ , participating in  $Y-Zn \cdots O$  interactions, the distance-cone corrected population or population density is given by

$$D_{\theta_{1\theta_2,r_1r_2}} = \frac{N_{\theta_{1\theta_2,r_1r_2}}}{V_{\theta_{1\theta_2,r_1r_2}}}$$

Where  $V_{\theta_{1\theta_2,r_1r_2}} = \frac{2}{3} \pi (r_2^2 - r_1^2) (\cos\theta_1 - \cos\theta_2)$  is the volume of space confined within the angle and distance ranges  $\theta_1 \rightarrow \theta_2$  and  $r_1 \rightarrow r_2$  respectively around the atom Zn.

**Compuation:** Non-hydrogen atoms frozen optimized energy, molecular electrostatic potential (MEP) surface (isoval 0.001 a.u.) and natural bond orbital (NBO) calculations were performed by using M06-2X functional with GENIECP option (basis set combination of LANL2TZ for Cd and 6-311+G(d, p) for other atoms) for the monomer of a neutral Cd coordination complex, dichloro-bis(*N*-methylimidazoline-2-thione-*S*)-cadmium(II) (refcode, HIFDFA).

For the dimer of this complex, non-hydrogen atoms frozen optimized energy calculation was performed by using M06-2X functional with GENIECP option (basis set combination of LANL2TZ for Cd and 6-311+G(d, p) for other atoms). The dimerization energy was subjected to BSSE correction using the counterpoise method. This structure was then used for single-point energy and NBO calculations by using M06-2X functional with GENIECP option (basis set combination of LANL2TZ for Cd and 6-311+G(d, p) for other atoms).

All the calculations were carried out using the Gaussian 16 program.<sup>51</sup>

**Figure S1. Figures of the dimers obtained from crystal structure and from fully optimized dimer and monomer.**

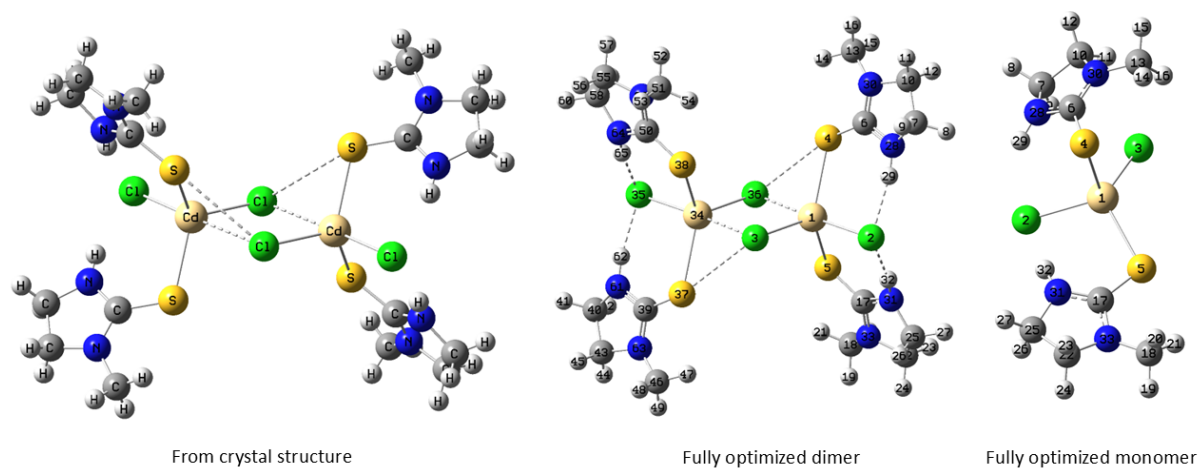

**Table S1: Comparison of geometrical parameters among the dimer obtained from crystal structure and the dimer and monomer obtained from fully optimized geometry.**

|                        | Crystal structure | Optimized dimer <sup>a</sup> | Optimized monomer <sup>a</sup> |
|------------------------|-------------------|------------------------------|--------------------------------|
| <b>Cd1-Cl2</b>         | 2.5496            | 2.6053                       | 2.5345                         |
| <b>Cd1-Cl3</b>         | 2.4502            | 2.5606                       | 2.4674                         |
| <b>Cl36...Cd1</b>      | 3.1559            | 2.7112                       |                                |
| <b>Cd1-S4</b>          | 2.5278            | 2.7062                       | 2.6949                         |
| <b>Cd1-S5</b>          | 2.5494            | 2.7030                       | 2.6309                         |
| <b>Cl36...S4</b>       | 3.4889            | 3.4574                       |                                |
| <b>∠S4-Cd1-S5</b>      | 112.477           | 121.119                      | 110.238                        |
| <b>∠S4-Cd1-Cl2</b>     | 104.882           | 98.654                       | 99.955                         |
| <b>∠S4-Cd1-Cl3</b>     | 117.181           | 116.815                      | 101.770                        |
| <b>∠C6-S4-Cd1-S5</b>   | 111.437           | 114.155                      | 170.082                        |
| <b>∠C17-S5-Cd1-S4</b>  | 85.978            | 115.519                      | 80.056                         |
| <b>∠N31-C17-S5-Cd1</b> | 11.802            | 20.880                       | 3.485                          |
| <b>∠N28-C6-S4-Cd1</b>  | 2.128             | 19.784                       | 69.749                         |

<sup>a</sup> The monomer and dimer are fully optimized by using M06-2X functional with GENECP option (basis set combination of LANL2TZ for Cd and 6-311+G(d, p) for other atoms).

All the three Cd–Cl distances are more or less similar in the fully optimized dimer, indicating a coordination bond between Cl and Cd which is in contrast with the crystal structure in which two coordinated Cd–Cl bonds are significantly shorter than the third spodium Cd...Cl bond distance. In the spodium bonding, Cl3 donates electron to the  $\sigma^*$  orbital of and Cd–Cl2. As a result, the Cd–Cl3 bond length slightly decreases and the Cd–Cl2 bond length slightly increases in the dimer (crystal structure) in comparison to fully optimized monomer. This signifies some amount of charge transfer in this interaction. Geometry of the optimized monomer is very much different from that of the single unit present in the dimer in the crystal structure which signifies the importance of the spodium bond in this dimer.

**Table S2. Data for % population vs  $\angle Y-Sp...LB$  angle for the  $Y_4Sp...LB$  interactions before cone correction.**

**(a)  $Y_4Zn...LB$  Interaction.**

| $\angle Y-Zn...LB$ angle range (°) | No of hits Before cone correction (n) | % of hits before cone correction |
|------------------------------------|---------------------------------------|----------------------------------|
| 180-175                            | 18                                    | 8.654                            |
| 175-170                            | 31                                    | 14.904                           |
| 170-165                            | 33                                    | 15.865                           |
| 165-160                            | 42                                    | 20.192                           |
| 160-155                            | 47                                    | 22.596                           |
| 155-150                            | 37                                    | 17.788                           |

**(b)  $Y_4Cd...LB$  interactions.**

| $\angle Y-Cd...LB$ angle range (°) | No of hits Before cone correction (n) | % of hits before cone correction |
|------------------------------------|---------------------------------------|----------------------------------|
| 180-175                            | 11                                    | 12.941                           |
| 175-170                            | 11                                    | 12.941                           |
| 170-165                            | 15                                    | 17.647                           |
| 165-160                            | 17                                    | 20.000                           |
| 160-155                            | 17                                    | 20.000                           |

|         |    |        |
|---------|----|--------|
| 155-150 | 14 | 16.471 |
|---------|----|--------|

**(c) Y<sub>4</sub>Hg...LB Interactions.**

| $\angle Y-Hg \dots LB$ angle range (°) | No of hits Before cone correction (n) | % of hits before cone correction |
|----------------------------------------|---------------------------------------|----------------------------------|
| 180-175                                | 48                                    | 9.339                            |
| 175-170                                | 87                                    | 16.926                           |
| 170-165                                | 96                                    | 18.677                           |
| 165-160                                | 91                                    | 17.704                           |
| 160-155                                | 110                                   | 21.401                           |
| 155-150                                | 82                                    | 15.953                           |

**Table S3. Data for % population vs  $\angle Y-Sp \dots LB$  angle for Y<sub>4</sub>Sp...LB interactions after cone correction.**

**(a) Y<sub>4</sub>Zn...LB Interactions.**

| $\angle Y-Zn \dots LB$ angle range (°) | No of hits before cone corrections (n) | Mid-point of the angle range | $\sin \theta$ | No of hits after cone correction = $n/\sin \theta$ | % of hits after cone correction |
|----------------------------------------|----------------------------------------|------------------------------|---------------|----------------------------------------------------|---------------------------------|
| 180-175                                | 18                                     | 177.5                        | 0.044         | 409.09                                             | 35.832                          |
| 175-170                                | 31                                     | 172.5                        | 0.131         | 237.50                                             | 20.803                          |
| 170-165                                | 33                                     | 167.5                        | 0.216         | 152.47                                             | 13.355                          |
| 165-160                                | 42                                     | 162.5                        | 0.301         | 139.67                                             | 12.234                          |
| 160-155                                | 47                                     | 157.5                        | 0.383         | 122.82                                             | 10.758                          |
| 155-150                                | 37                                     | 152.5                        | 0.462         | 80.13                                              | 7.019                           |

**(b) Y<sub>4</sub>Cd...LB interactions.**

| $\angle Y-Cd \dots LB$ angle range (°) | No of hits before cone corrections (n) | Mid-point of the angle range | $\sin \theta$ | No of hits after cone correction = $n/\sin \theta$ | % of hits after cone correction |
|----------------------------------------|----------------------------------------|------------------------------|---------------|----------------------------------------------------|---------------------------------|
| 180-175                                | 11                                     | 177.5                        | 0.044         | 252.18                                             | 46.958                          |
| 175-170                                | 11                                     | 172.5                        | 0.131         | 84.27                                              | 15.692                          |
| 170-165                                | 15                                     | 167.5                        | 0.216         | 69.30                                              | 12.905                          |
| 165-160                                | 17                                     | 162.5                        | 0.301         | 56.53                                              | 10.527                          |
| 160-155                                | 17                                     | 157.5                        | 0.383         | 44.42                                              | 8.272                           |
| 155-150                                | 14                                     | 152.5                        | 0.462         | 30.32                                              | 5.646                           |

**(c) Y<sub>4</sub>Hg...LB interactions.**

| $\angle Y-Hg \dots LB$ angle range (°) | No of hits before cone corrections (n) | Mid-point of the angle range | $\sin \theta$ | No of hits after cone correction = $n/\sin \theta$ | % of hits after cone correction |
|----------------------------------------|----------------------------------------|------------------------------|---------------|----------------------------------------------------|---------------------------------|
| 180-175                                | 48                                     | 177.5                        | 0.044         | 1100.43                                            | 36.950                          |
| 175-170                                | 87                                     | 172.5                        | 0.131         | 666.53                                             | 22.381                          |
| 170-165                                | 96                                     | 167.5                        | 0.216         | 443.54                                             | 14.893                          |
| 165-160                                | 91                                     | 162.5                        | 0.301         | 302.62                                             | 10.161                          |

|         |     |       |       |         |       |
|---------|-----|-------|-------|---------|-------|
| 160-155 | 110 | 157.5 | 0.383 | 287.44  | 9.652 |
| 155-150 | 82  | 152.5 | 0.462 | 177.586 | 5.963 |

**Table S4. Data for % population vs  $\angle Y-Sp \dots LB$  angle for the  $Y_5Sp \dots LB$  interactions before cone correction.**

**(a)  $Y_5Zn \dots LB$  Interactions.**

| $\angle Y-Zn \dots LB$ angle range (°) | No of hits Before cone correction (n) | % of hits before cone correction |
|----------------------------------------|---------------------------------------|----------------------------------|
| 180-170                                | 1094                                  | 8.513                            |
| 170-160                                | 2224                                  | 17.306                           |
| 160-150                                | 2734                                  | 21.275                           |
| 150-140                                | 3007                                  | 23.399                           |
| 140-130                                | 2448                                  | 19.049                           |
| 130-120                                | 1154                                  | 8.980                            |
| 120-110                                | 181                                   | 1.408                            |
| 110-100                                | 9                                     | 0.070                            |
| 100-90                                 | 0                                     | 0                                |

**(b)  $Y_5Cd \dots LB$  Interactions.**

| $\angle Y-Zn \dots LB$ angle range (°) | No of hits Before cone correction (n) | % of hits before cone correction |
|----------------------------------------|---------------------------------------|----------------------------------|
| 180-170                                | 149                                   | 11.203                           |
| 170-160                                | 251                                   | 18.872                           |
| 160-150                                | 288                                   | 21.654                           |
| 150-140                                | 287                                   | 21.579                           |
| 140-130                                | 247                                   | 18.571                           |
| 130-120                                | 83                                    | 6.241                            |
| 120-110                                | 23                                    | 1.729                            |
| 110-100                                | 2                                     | 0.150                            |
| 100-90                                 | 0                                     | 0                                |

**(c)  $Y_5Hg \dots LB$  Interactions.**

| $\angle Y-Zn \dots LB$ angle range (°) | No of hits Before cone correction (n) | % of hits before cone correction |
|----------------------------------------|---------------------------------------|----------------------------------|
| 180-170                                | 97                                    | 9.291                            |
| 170-160                                | 151                                   | 14.464                           |
| 160-150                                | 231                                   | 22.126                           |
| 150-140                                | 287                                   | 27.490                           |
| 140-130                                | 181                                   | 17.337                           |
| 130-120                                | 66                                    | 6.322                            |
| 120-110                                | 17                                    | 1.628                            |
| 110-100                                | 13                                    | 1.245                            |
| 100-90                                 | 1                                     | 0.096                            |

**Table S5. Data for % population vs  $\angle Y\text{-Sp}\cdots\text{LB}$  angle for the  $Y_5\text{Sp}\cdots\text{LB}$  interactions after cone correction.**

**(a)  $Y_5\text{Zn}\cdots\text{LB}$  Interactions.**

| $\angle Y\text{-Zn}\cdots\text{LB}$<br>angle range (°) | No of hits<br>before<br>cone<br>corrections<br>(n) | Mid-point of the<br>angle range | $\text{Sin}\theta$ | No of hits<br>after cone<br>correction =<br>$n/\text{sin}\theta$ | % of hits after cone correction |
|--------------------------------------------------------|----------------------------------------------------|---------------------------------|--------------------|------------------------------------------------------------------|---------------------------------|
| 180-170                                                | 1094                                               | 175                             | 0.0872             | 12552.24                                                         | 33.087                          |
| 170-160                                                | 2224                                               | 165                             | 0.2588             | 8592.876                                                         | 22.651                          |
| 160-150                                                | 2734                                               | 155                             | 0.4226             | 6469.195                                                         | 17.053                          |
| 150-140                                                | 3007                                               | 145                             | 0.5736             | 5242.545                                                         | 13.819                          |
| 140-130                                                | 2448                                               | 135                             | 0.7071             | 3461.995                                                         | 9.126                           |
| 130-120                                                | 1154                                               | 125                             | 0.8192             | 1408.774                                                         | 3.713                           |
| 120-110                                                | 181                                                | 115                             | 0.9063             | 199.7114                                                         | 0.526                           |
| 110-100                                                | 9                                                  | 105                             | 0.9659             | 9.317486                                                         | 0.025                           |
| 100-90                                                 | 0                                                  | 95                              | 0.9962             | 0                                                                | 0.000                           |

**(b)  $Y_5\text{Cd}\cdots\text{LB}$  Interactions.**

| $\angle Y\text{-Cd}\cdots\text{LB}$<br>angle range (°) | No of hits<br>before<br>cone<br>corrections<br>(n) | Mid-point of the<br>angle range | $\text{Sin}\theta$ | No of hits<br>after cone<br>correction =<br>$n/\text{sin}\theta$ | % of hits after cone correction |
|--------------------------------------------------------|----------------------------------------------------|---------------------------------|--------------------|------------------------------------------------------------------|---------------------------------|
| 180-170                                                | 149                                                | 175                             | 0.0872             | 1709.5833                                                        | 39.3978                         |
| 170-160                                                | 251                                                | 165                             | 0.2588             | 969.7895                                                         | 22.3490                         |
| 160-150                                                | 288                                                | 155                             | 0.4226             | 681.4661                                                         | 15.7045                         |
| 150-140                                                | 287                                                | 145                             | 0.5736             | 500.3692                                                         | 11.5311                         |
| 140-130                                                | 247                                                | 135                             | 0.7071             | 349.3107                                                         | 8.0499                          |
| 130-120                                                | 83                                                 | 125                             | 0.8192             | 101.3243                                                         | 2.3350                          |
| 120-110                                                | 23                                                 | 115                             | 0.9063             | 25.3777                                                          | 0.5848                          |
| 110-100                                                | 2                                                  | 105                             | 0.9659             | 2.0706                                                           | 0.0477                          |
| 100-90                                                 | 0                                                  | 95                              | 0.9962             | 0.0000                                                           | 0.0000                          |

**(c)  $Y_5\text{Hg}\cdots\text{LB}$  Interactions.**

| $\angle Y\text{-Hg}\cdots\text{LB}$<br>angle range<br>(°) | No of hits<br>before<br>cone<br>corrections<br>(n) | Mid-point of the<br>angle range | $\text{Sin}\theta$ | No of hits<br>after cone<br>correction =<br>$n/\text{sin}\theta$ | % of hits after cone correction |
|-----------------------------------------------------------|----------------------------------------------------|---------------------------------|--------------------|------------------------------------------------------------------|---------------------------------|
| 180-170                                                   | 97                                                 | 175                             | 0.0872             | 1112.95                                                          | 35.751                          |
| 170-160                                                   | 151                                                | 165                             | 0.2588             | 583.4192                                                         | 18.741                          |
| 160-150                                                   | 231                                                | 155                             | 0.4226             | 546.5926                                                         | 17.558                          |
| 150-140                                                   | 287                                                | 145                             | 0.5736             | 500.3692                                                         | 16.073                          |
| 140-130                                                   | 181                                                | 135                             | 0.7071             | 255.9727                                                         | 8.222                           |
| 130-120                                                   | 66                                                 | 125                             | 0.8192             | 80.57112                                                         | 2.588                           |
| 120-110                                                   | 17                                                 | 115                             | 0.9063             | 18.75742                                                         | 0.603                           |



|         |    |     |        |          |       |
|---------|----|-----|--------|----------|-------|
| 110-100 | 13 | 105 | 0.9659 | 13.45859 | 0.432 |
| 100-90  | 1  | 95  | 0.9962 | 1.00382  | 0.032 |

**Table S6. Data for the 3D plot of % population density at different Zn...O distances and  $\angle Y-Zn...O$  angles for the  $Y_5Zn...O$  complexes used for distance-cone correction.**

**(a) Number of hits (n) at different Zn...O distance and  $\angle Y-Zn...O$  angle ranges before distance-cone correction.**

| Angle range (°)       | Distance range (Å) |             |             |             |             |             |             |             |             |             |
|-----------------------|--------------------|-------------|-------------|-------------|-------------|-------------|-------------|-------------|-------------|-------------|
|                       | 4.41-4.199         | 4.199-3.988 | 3.988-3.777 | 3.777-3.566 | 3.566-3.355 | 3.355-3.144 | 3.144-2.933 | 2.933-2.722 | 2.722-2.511 | 2.511-2.300 |
| $\theta_2 - \theta_1$ | 123                | 108         | 117         | 86          | 59          | 29          | 31          | 28          | 31          | 3           |
| 180-170               | 334                | 314         | 275         | 166         | 96          | 49          | 38          | 9           | 24          | 4           |
| 170-160               | 573                | 524         | 372         | 163         | 62          | 25          | 37          | 12          | 7           | 2           |
| 160-150               | 671                | 690         | 490         | 167         | 54          | 77          | 39          | 5           | 4           | 0           |
| 150-140               | 535                | 677         | 440         | 144         | 57          | 43          | 5           | 4           | 0           | 0           |
| 140-130               | 346                | 392         | 138         | 40          | 10          | 7           | 3           | 0           | 0           | 0           |
| 130-120               | 75                 | 44          | 15          | 3           | 1           | 0           | 0           | 0           | 0           | 0           |
| 120-110               | 3                  | 5           | 0           | 0           | 0           | 0           | 0           | 0           | 0           | 0           |

**(b) % of hits before distance-cone correction.**

| Angle range (°)       | Distance range (Å) |             |             |             |             |             |             |             |             |           |
|-----------------------|--------------------|-------------|-------------|-------------|-------------|-------------|-------------|-------------|-------------|-----------|
|                       | 4.41-4.199         | 4.199-3.988 | 3.988-3.777 | 3.777-3.566 | 3.566-3.355 | 3.355-3.144 | 3.144-2.933 | 2.933-2.722 | 2.722-2.511 | 2.511-2.3 |
| $\theta_2 - \theta_1$ | 1.3844             | 1.2155      | 1.3168      | 0.9679      | 0.6640      | 0.3264      | 0.3489      | 0.3151      | 0.3489      | 0.0338    |
| 180-170               | 3.7591             | 3.5340      | 3.0951      | 1.8683      | 1.0805      | 0.5515      | 0.4277      | 0.1013      | 0.2701      | 0.0450    |
| 170-160               | 6.4491             | 5.8976      | 4.1868      | 1.8346      | 0.6978      | 0.2814      | 0.4164      | 0.1351      | 0.0788      | 0.0225    |
| 160-150               | 7.5521             | 7.7659      | 5.5149      | 1.8796      | 0.6078      | 0.8666      | 0.4389      | 0.0563      | 0.0450      | 0.0000    |
| 150-140               | 6.0214             | 7.6196      | 4.9522      | 1.6207      | 0.6415      | 0.4840      | 0.0563      | 0.0450      | 0.0000      | 0.0000    |
| 140-130               | 3.8942             | 4.4119      | 1.5532      | 0.4502      | 0.1125      | 0.0788      | 0.0338      | 0.0000      | 0.0000      | 0.0000    |
| 130-120               | 0.8441             | 0.4952      | 0.1688      | 0.0338      | 0.0113      | 0.0000      | 0.0000      | 0.0000      | 0.0000      | 0.0000    |
| 120-110               | 0.0338             | 0.0563      | 0.0000      | 0.0000      | 0.0000      | 0.0000      | 0.0000      | 0.0000      | 0.0000      | 0.0000    |

**(c) Volume of the rings (v) for different distance and angle ranges.**

| Angle range (°)       | Distance range (Å) |             |             |             |             |             |             |             |             |           |
|-----------------------|--------------------|-------------|-------------|-------------|-------------|-------------|-------------|-------------|-------------|-----------|
|                       | 4.41-4.199         | 4.199-3.988 | 3.988-3.777 | 3.777-3.566 | 3.566-3.355 | 3.355-3.144 | 3.144-2.933 | 2.933-2.722 | 2.722-2.511 | 2.511-2.3 |
| $\theta_2 - \theta_1$ | 0.1782             | 0.1612      | 0.1450      | 0.1297      | 0.1152      | 0.1016      | 0.0888      | 0.0769      | 0.0659      | 0.0557    |
| 180-170               | 0.5292             | 0.4786      | 0.4306      | 0.3851      | 0.3421      | 0.3017      | 0.2638      | 0.2284      | 0.1956      | 0.1654    |
| 170-160               | 0.8642             | 0.7816      | 0.7031      | 0.6288      | 0.5586      | 0.4926      | 0.4307      | 0.3730      | 0.3194      | 0.2700    |
| 160-150               | 1.1729             | 1.0607      | 0.9542      | 0.8534      | 0.7581      | 0.6685      | 0.5845      | 0.5062      | 0.4335      | 0.3664    |
| 150-140               | 1.4459             | 1.3077      | 1.1764      | 1.0520      | 0.9346      | 0.8241      | 0.7206      | 0.6241      | 0.5344      | 0.4518    |
| 140-130               | 1.6750             | 1.5149      | 1.3628      | 1.2187      | 1.0827      | 0.9547      | 0.8348      | 0.7229      | 0.6191      | 0.5233    |
| 130-120               | 1.8533             | 1.6761      | 1.5078      | 1.3484      | 1.1979      | 1.0563      | 0.9236      | 0.7999      | 0.6850      | 0.5790    |
| 120-110               | 1.9752             | 1.7863      | 1.6070      | 1.4371      | 1.2767      | 1.1258      | 0.9844      | 0.8525      | 0.7300      | 0.6171    |

(d) Distance-cone corrected population = Density of the populations for each ring = Number of hits/Volume of the rings (n/v) for different distance and angle ranges.

| Angle range (°)       | Distance range (Å) |             |             |             |             |             |             |             |             |           |
|-----------------------|--------------------|-------------|-------------|-------------|-------------|-------------|-------------|-------------|-------------|-----------|
|                       | 4.41-4.199         | 4.199-3.988 | 3.988-3.777 | 3.777-3.566 | 3.566-3.355 | 3.355-3.144 | 3.144-2.933 | 2.933-2.722 | 2.722-2.511 | 2.511-2.3 |
| $\theta_2 - \theta_1$ | 4.41-4.199         | 4.199-3.988 | 3.988-3.777 | 3.777-3.566 | 3.566-3.355 | 3.355-3.144 | 3.144-2.933 | 2.933-2.722 | 2.722-2.511 | 2.511-2.3 |
| 180-170               | 690.16             | 670.06      | 806.92      | 663.23      | 512.17      | 285.49      | 349.01      | 364.02      | 470.61      | 53.88     |
| 170-160               | 631.09             | 656.02      | 638.67      | 431.10      | 280.63      | 162.44      | 144.07      | 39.40       | 122.69      | 24.19     |
| 160-150               | 663.05             | 670.45      | 529.10      | 259.24      | 110.99      | 50.75       | 85.91       | 32.17       | 21.92       | 7.41      |
| 150-140               | 572.10             | 650.49      | 513.51      | 195.70      | 71.23       | 115.18      | 66.72       | 9.88        | 9.23        | 0.00      |
| 140-130               | 370.00             | 517.71      | 374.03      | 136.88      | 60.99       | 52.18       | 6.94        | 6.41        | 0.00        | 0.00      |
| 130-120               | 206.56             | 258.77      | 101.26      | 32.82       | 9.24        | 7.33        | 3.59        | 0.00        | 0.00        | 0.00      |
| 120-110               | 40.47              | 26.25       | 9.95        | 2.22        | 0.83        | 0.00        | 0.00        | 0.00        | 0.00        | 0.00      |
| 110-100               | 1.52               | 2.80        | 0.00        | 0.00        | 0.00        | 0.00        | 0.00        | 0.00        | 0.00        | 0.00      |

(e) Distance-cone corrected % population (% of the population density of the rings for different distance and angle ranges).

| Angle range (°)       | Distance range (Å) |             |             |             |             |             |             |             |             |             |
|-----------------------|--------------------|-------------|-------------|-------------|-------------|-------------|-------------|-------------|-------------|-------------|
|                       | 4.41-4.199         | 4.199-3.988 | 3.988-3.777 | 3.777-3.566 | 3.566-3.355 | 3.355-3.144 | 3.144-2.933 | 2.933-2.722 | 2.722-2.511 | 2.511-2.300 |
| $\theta_2 - \theta_1$ | 4.41-4.199         | 4.199-3.988 | 3.988-3.777 | 3.777-3.566 | 3.566-3.355 | 3.355-3.144 | 3.144-2.933 | 2.933-2.722 | 2.722-2.511 | 2.511-2.300 |
| 180-170               | 4.4893             | 4.3617      | 5.2193      | 4.3160      | 3.3198      | 1.8516      | 2.2629      | 2.3593      | 3.0531      | 0.3530      |
| 170-160               | 4.3175             | 4.4929      | 4.3752      | 2.9505      | 1.9215      | 1.1111      | 0.9862      | 0.2694      | 0.8400      | 0.1665      |
| 160-150               | 4.5668             | 4.6175      | 3.6442      | 1.7856      | 0.7644      | 0.3496      | 0.5918      | 0.2216      | 0.1509      | 0.0510      |
| 150-140               | 3.9040             | 4.4387      | 3.5042      | 1.3355      | 0.4860      | 0.7860      | 0.4553      | 0.0674      | 0.0630      | 0.0000      |
| 140-130               | 2.5102             | 3.5121      | 2.5376      | 0.9287      | 0.4137      | 0.3540      | 0.0471      | 0.0435      | 0.0000      | 0.0000      |
| 130-120               | 1.4177             | 1.7758      | 0.6950      | 0.2253      | 0.0634      | 0.0503      | 0.0247      | 0.0000      | 0.0000      | 0.0000      |
| 120-110               | 0.2779             | 0.1803      | 0.0683      | 0.0153      | 0.0057      | 0.0000      | 0.0000      | 0.0000      | 0.0000      | 0.0000      |
| 110-100               | 0.0103             | 0.0190      | 0.0000      | 0.0000      | 0.0000      | 0.0000      | 0.0000      | 0.0000      | 0.0000      | 0.0000      |

Table S7. Refcodes for the cone and distance-cone corrections.

(a) Refcodes,  $\angle Y-Zn \cdots LB$  angles and the interacting LB atoms for the cone correction of the  $CdY_5 \cdots LB$  systems.

| Refcode  | $\angle YZnLB$ | LB  | Refcode | $\angle YZnLB$ | LB   | Refcode  | $\angle YZnLB$ | LB  |
|----------|----------------|-----|---------|----------------|------|----------|----------------|-----|
| AJALEF   | 180            | N2  | QUXVUB  | 179.155        | O21  | HOPTOY   | 177.866        | O14 |
| JEKXAC   | 180            | N4  | MUJHOP  | 179.106        | O1   | IMEFOV   | 177.846        | Cl2 |
| JEKXEG   | 180            | N4  | JESSUW  | 179.098        | O1   | KAXXEO   | 177.834        | O7  |
| DUJVOW   | 180            | Cl1 | ADIZAP  | 179.095        | O29  | XEQNIR   | 177.833        | O4  |
| TEVWIA   | 180            | Cl1 | NAGZIF  | 179.065        | N4A  | LEJYAE   | 177.804        | S3  |
| YEZGAP   | 180            | Cl1 | NIJTIJ  | 179.043        | Cl3  | RUZVOX   | 177.799        | O5  |
| ZOFLOV   | 180            | Cl1 | WUBROA  | 179.005        | S1   | YIHHAB   | 177.785        | F2  |
| YAYMIX   | 180            | I3  | TAZJAH  | 178.963        | O6   | RUZVIR   | 177.755        | Cl2 |
| AFEGAV   | 180            | O3  | POCCER  | 178.95         | Cl1  | JULDEZ   | 177.734        | Cl2 |
| AFEGAV01 | 180            | O3  | OGUNIP  | 178.852        | O3   | LOSLEK   | 177.713        | Cl1 |
| BEPNER   | 180            | O5  | MIKCEP  | 178.84         | O5   | MIMRAB01 | 177.678        | O5  |
| CITTUW   | 180            | O1  | ECAVAF  | 178.814        | N8   | BIBGOJ   | 177.65         | O1  |
| FUBNOH   | 180            | O3  | BINBAE  | 178.812        | O2   | UMIJAD   | 177.647        | O4  |
| GATVAZ   | 180            | O1  | DAJLIM  | 178.772        | N4   | TOKVUK   | 177.616        | O5  |
| HAJBAW   | 180            | O4  | MOJKAY  | 178.745        | Cl13 | PUPVEC   | 177.591        | N7  |

|                |               |           |                |               |           |                |               |           |
|----------------|---------------|-----------|----------------|---------------|-----------|----------------|---------------|-----------|
| HUCLOH         | 180           | O2        | DITWEL         | 178.7         | O5        | QORKIR         | 177.583       | O6        |
| HUZHAM         | 180           | O3        | FODXAA         | 178.672       | O9        | RUZVAJ         | 177.564       | Cl4       |
| <b>Refcode</b> | <b>∠YZnLB</b> | <b>LB</b> | <b>Refcode</b> | <b>∠YZnLB</b> | <b>LB</b> | <b>Refcode</b> | <b>∠YZnLB</b> | <b>LB</b> |
| IFABIA01       | 180           | O3        | KETPAC         | 178.667       | N5        | BUSLOS         | 177.542       | O18       |
| IFABIA03       | 180           | O3        | SIYFUD         | 178.623       | O3        | IPAPEU         | 177.508       | O6        |
| IWORET01       | 180           | O2        | NEPMIF         | 178.59        | O3B       | VUDMAK         | 177.499       | O11       |
| LAYXAM         | 180           | O1        | YARBIE         | 178.567       | O3        | GIWHEA         | 177.496       | O3        |
| LEQWIP         | 180           | O3        | LUXVOR         | 178.529       | O14       | KUCVEL         | 177.488       | O5        |
| MIMRAB         | 180           | O3        | TUQWAG         | 178.404       | O6        | BETTEC         | 177.486       | O5        |
| MIMRAB02       | 180           | O3        | QIBYEJ         | 178.382       | Cl1       | QUTCUF         | 177.482       | S2        |
| POLDOL         | 180           | O11       | SOPNOB         | 178.368       | O7        | XABRIE         | 177.468       | O7        |
| RIDXIM         | 180           | O21       | FELPES         | 178.309       | O5        | PICBAE         | 177.467       | O11       |
| RIDXIM         | 180           | O21       | UKEZIV         | 178.296       | S2        | OYOWIL         | 177.446       | N23       |
| RIWWOK         | 180           | O3        | SEWVEZ         | 178.29        | O9        | WIRHUD         | 177.426       | O11       |
| UNOKIS         | 180           | O5        | WEPPUD         | 178.281       | N7        | IPUKIQ         | 177.412       | O5        |
| YETJIR         | 180           | O3        | LIHXUX         | 178.277       | O3        | RUWMON         | 177.406       | O15       |
| YETJIR         | 180           | O6        | NOJGOJ         | 178.18        | N9        | WARDUP         | 177.403       | O7        |
| BUPGEZ         | 180           | F1        | WUBROA         | 178.156       | F5        | QOLPEO         | 177.392       | O7        |
| XIVXOS         | 180           | F5        | XIYCIV         | 178.142       | O7        | EQOVIP         | 177.372       | F1        |
| LOVJEL         | 179.999       | Cl4       | QUJZAZ         | 178.069       | O3B       | DOZFOO         | 177.301       | O1        |
| GEZKED         | 179.992       | O3        | PEWGEE         | 178.064       | O4        | INAKOA         | 177.297       | S1        |
| PIPKAC         | 179.939       | N4        | VIRLAK         | 178.056       | O90       | NUWPAZ         | 177.293       | O1        |
| YIQDOV         | 179.858       | O2        | FIQDAN         | 178.048       | O5        | JAMHAH         | 177.262       | N5        |
| QIXWUR         | 179.7         | O5A       | XOQZEJ         | 178.023       | N3        | TAQTUD         | 177.261       | N8        |
| FIDFUU         | 179.51        | Cl2       | PIPKEG         | 177.963       | N4        | POCVAG         | 177.239       | N5        |
| WEGFOG         | 179.443       | Cl2       | YEJNIO         | 177.961       | S8        | BOBHEF         | 177.236       | O3        |
| NIDDIO         | 179.279       | O5        | LACXUM         | 177.937       | N22       | HAVZUA         | 177.234       | N2        |
| IQUDAA         | 179.224       | Cl1       | JULDEZ01       | 177.89        | Cl2       | IZOWAW         | 177.234       | O31G      |
| MIKBUE         | 179.218       | O3        | DOCFUX         | 177.884       | O6        | ALONEU         | 177.224       | N19       |
| LILVAD         | 179.211       | O6        | CAKGAW         | 177.876       | I2        | JUNWIA         | 177.214       | S10       |
| LEDVOJ         | 179.194       | O6        | WEMZUJ         | 177.876       | O6        | XOXHOJ         | 177.213       | Cl2       |
| LIHYEI         | 179.191       | Cl4       | PAHROG         | 177.875       | O7        | MOJKAY         | 177.199       | O92       |
| PIPKIK         | 179.164       | N4        | LOWGEM         | 177.868       | O1        | ESADUY         | 177.187       | N9        |
| UFUHAE         | 177.158       | O1        | GONJOL         | 176.665       | I3        | IBESAN         | 176.004       | N3        |
| DEHPOX         | 177.145       | O9        | CIXZOA         | 176.66        | Cl4       | MEMPAV         | 175.99        | S2        |
| VUDMUE         | 177.117       | O11       | DOYBOJ         | 176.646       | O5        | OQIPEL         | 175.986       | N8        |
| UDACEH         | 177.109       | O7        | BECSEK         | 176.643       | O13       | ICUGET         | 175.986       | O2        |
| EBITUG         | 177.094       | O3B       | YIRPUO         | 176.623       | O17       | UKEHOJ         | 175.983       | O22       |
| CAYWEG         | 177.066       | O7        | MAKHAH         | 176.616       | N15       | UDIRUW         | 175.962       | O3B       |
| MATNIF         | 177.062       | O12       | SENJEB         | 176.591       | O1C       | BAMZAR         | 175.957       | O2        |
| MALTUR         | 177.06        | N21       | YIRPUO02       | 176.551       | O17       | LIFHAJ         | 175.937       | Cl4       |
| RAHFIP         | 177.059       | O3        | VICXEK         | 176.548       | Cl2       | ZAXMIU         | 175.924       | Cl2       |
| JEXQEJ         | 177.054       | Cl1       | VIRLAK         | 176.523       | O91       | MAVZEP         | 175.898       | N2        |
| BAYVAB         | 177.052       | Cl3       | VETNAK         | 176.514       | Cl1       | IGETUK         | 175.887       | O3        |
| VIRLAK         | 177.052       | O91       | VAXVOJ         | 176.493       | O19       | PAQKUR         | 175.875       | O9        |
| LETRUB         | 177.045       | F7        | YIRPUO01       | 176.482       | O19       | XIKRUH         | 175.865       | O3        |
| NUTHUF         | 177.038       | S1        | YEQRIZ         | 176.473       | O5        | TAYBII         | 175.842       | O4        |
| XULZIQ         | 177.012       | O26       | XUYXAR         | 176.471       | O9        | QEJBIT         | 175.83        | N1        |
| CUJFOF         | 177.005       | O5        | VIRLAK         | 176.462       | O90       | CUYTUM         | 175.828       | O11       |
| SUWBOC         | 177.003       | O2        | GANGOS         | 176.453       | O6        | TUYGAX         | 175.827       | N1        |
| ACIKAA         | 176.998       | S2        | EYERAB         | 176.451       | O13       | YIZCUH         | 175.817       | O3        |
| WIBVOS         | 176.993       | Cl10      | MOCTEF         | 176.435       | O12       | UFEBIT         | 175.793       | O2        |
| EXIFUN         | 176.984       | O7        | EFASUA         | 176.433       | Cl1       | CUBWIG         | 175.772       | O12       |
| VONTOK         | 176.971       | S2        | GABVUD         | 176.418       | O5        | UQENAG         | 175.75        | N3        |
| DOMYUC01       | 176.964       | O5        | DOMYUC02       | 176.393       | O5        | TUYGAX02       | 175.736       | N2        |
| ZIVSIK         | 176.93        | O14       | YAXJEP         | 176.375       | Te1A      | QUTCUF         | 175.718       | S1        |
| MIKBOY         | 176.922       | O10       | POQSJ          | 176.367       | O5        | JAWPUV         | 175.716       | N9        |
| VETNAK01       | 176.915       | Cl1B      | SEPMOS         | 176.362       | O1A       | RUYTAG         | 175.71        | O4        |
| ODOFAQ         | 176.903       | Cl1       | FAVQOK         | 176.339       | O9        | LACXUM         | 175.706       | N5        |
| XAPGAZ         | 176.893       | O47       | TIBQAA         | 176.337       | O6        | DASQAQ         | 175.701       | O16       |

|                |               |           |                |               |           |                |               |           |
|----------------|---------------|-----------|----------------|---------------|-----------|----------------|---------------|-----------|
| FIPKUM         | 176.875       | N4        | FAYVOR         | 176.33        | N5        | RAXMUA         | 175.688       | N4        |
| XIXCIR         | 176.858       | CI6       | YAFVAC         | 176.31        | N3        | FOZJAI         | 175.68        | N1B       |
| <b>Refcode</b> | <b>∠YZnLB</b> | <b>LB</b> | <b>Refcode</b> | <b>∠YZnLB</b> | <b>LB</b> | <b>Refcode</b> | <b>∠YZnLB</b> | <b>LB</b> |
| DAWQOK         | 176.858       | O10       | MIKCEP         | 176.269       | O9        | CAFSEJ         | 175.672       | O6        |
| RETFEC         | 176.84        | N2A       | QORFAE         | 176.267       | O5        | NOPCOK         | 175.659       | O13       |
| XEKGEB         | 176.832       | O2        | IFABIA02       | 176.257       | O5        | WUSFAU         | 175.628       | O3        |
| WIYCAL         | 176.83        | O12       | MATNIF         | 176.213       | O9        | QIJKEB         | 175.613       | N6        |
| ZAZKIU         | 176.79        | O7        | NAMYUZ         | 176.205       | S1        | TEFQUQ         | 175.61        | N4        |
| HAZQIJ         | 176.786       | O2        | NAGZEB         | 176.173       | N1A       | CEYSEF         | 175.608       | O6        |
| IBUHIY         | 176.785       | N6        | QIJPUU         | 176.169       | N6        | TUYGAX01       | 175.602       | N2        |
| EFUJIA         | 176.771       | O5        | MADRAN         | 176.157       | O3        | QETFIF         | 175.599       | O3        |
| HIPYAK         | 176.761       | CI1       | TAZJAH         | 176.146       | O10       | TEHDOA         | 175.599       | O10       |
| PILHEZ         | 176.741       | N4        | LEBNIR         | 176.142       | CI1       | ETANOD         | 175.592       | O6        |
| BINKUI         | 176.74        | S8        | MUJHOP         | 176.133       | O7        | NECVAT         | 175.57        | O1        |
| FUGLOJ         | 176.739       | O6        | MIK CER        | 176.131       | O14       | ROBCIU         | 175.567       | O25       |
| SOFFEA         | 176.731       | O4        | XIDSOW         | 176.116       | N9        | LOLRUC         | 175.559       | O2        |
| EMECUV         | 176.72        | N1        | MATYIT         | 176.113       | N4        | PIPKEG         | 175.552       | N2        |
| BEMZEC         | 176.716       | O5A       | SAKRAZ         | 176.078       | O9        | XUNWIM         | 175.551       | O3        |
| VIXTOM         | 176.711       | O4        | SIGZEQ         | 176.068       | O99       | JIQVEN         | 175.549       | O1        |
| LIFHAJ         | 176.707       | CI2       | TUQWEK         | 176.06        | O3        | FEDYEU         | 175.544       | O9        |
| QAWLOT         | 176.686       | CI6       | MOSMEO         | 176.037       | O13       | MARDAN         | 175.502       | N30       |
| HOCCIO         | 176.683       | O16A      | FEFVAO         | 176.032       | O3        | PUDBIB         | 175.499       | O7        |
| MUVVUW         | 176.672       | F8        | VUNJAR         | 176.023       | N5        | FIMWAA         | 175.474       | N2        |
| XUSGUN01       | 175.464       | CI1       | MIPYIU         | 174.917       | O3        | SACNIV         | 174.534       | N8        |
| BUBYOO         | 175.463       | O6        | LINWOV         | 174.915       | N4        | LEBNIR         | 174.534       | CI3       |
| XAPXOB         | 175.456       | O1A       | CADBOC         | 174.898       | O1        | BOVNIK         | 174.529       | CI2       |
| MIHNOH         | 175.453       | O2        | KEKHEP         | 174.888       | O3        | JULDEZ01       | 174.521       | CI1       |
| BINBAE         | 175.44        | O9        | LEZVIW         | 174.885       | O13       | VAVKEK         | 174.519       | O3        |
| SESFAY         | 175.418       | O4        | NIDMOD         | 174.879       | CI2       | PANCUD         | 174.505       | S1        |
| TEXSOF         | 175.407       | N16       | SIBMEW         | 174.878       | N3        | QITRET         | 174.497       | O5        |
| IFIYEC         | 175.407       | S1        | QOFKIF         | 174.854       | O6        | LAPZUB         | 174.49        | N13       |
| QANTIJ         | 175.386       | O5        | XEHYAM         | 174.846       | O12       | IJEDIL         | 174.48        | O16       |
| UYAJIO         | 175.381       | O2        | VALFIZ         | 174.845       | N2        | VIBJEW         | 174.464       | O21       |
| SIVSUN         | 175.373       | N5        | OHUQAJ         | 174.819       | O9        | TAQXAN         | 174.448       | N4A       |
| SUZGEZ         | 175.366       | O5        | ONIWAK         | 174.815       | O4A       | RATCEW         | 174.447       | N4        |
| UFEBIT01       | 175.363       | O2        | MOJKAY         | 174.797       | CI16      | RETJIL         | 174.434       | O1        |
| QIJKEB         | 175.36        | N3        | ETUKAI         | 174.794       | CI1       | RETJIL01       | 174.434       | O1        |
| WOGHUV         | 175.36        | N1        | GIQZUF         | 174.794       | F1B       | ECONAO         | 174.432       | N4        |
| DASPUJ         | 175.356       | CI1       | SAKRAZ         | 174.785       | O9        | FAFDUM         | 174.424       | O1        |
| NIDMOD         | 175.355       | O10       | SUWFEW         | 174.784       | CI1B      | WENDEA         | 174.419       | O5A       |
| FODGAI         | 175.354       | O6        | NUYVOT         | 174.779       | O5        | RUZVIR         | 174.405       | CI1       |
| FOZGOT         | 175.336       | O3        | EJIPAP02       | 174.77        | N1        | ZOJNIX         | 174.4         | Te2B      |
| NOPCOK         | 175.322       | O5        | FIFXAU         | 174.763       | O6        | VIYDIQ         | 174.39        | F2        |
| RUCPAH         | 175.308       | O3        | YIBCAR         | 174.748       | O8        | IHECAB         | 174.379       | N2A       |
| QUGFII         | 175.297       | O8        | XUWGAY         | 174.747       | N5        | VIMNAJ         | 174.368       | O5        |
| HIYQUC         | 175.234       | N2A       | WENPIO         | 174.745       | O3        | HAHCIF         | 174.365       | O5        |
| WIYXUZ         | 175.233       | O8        | IKACEE         | 174.736       | CI5       | MOJKAY         | 174.364       | CI9       |
| ILUSIS         | 175.23        | O2        | GABBOD         | 174.735       | O9        | XOJWUP         | 174.363       | O7        |
| NEGHEN         | 175.213       | N2        | JAHNOY         | 174.713       | N4        | HEJDEJ         | 174.363       | S2A       |
| GOPDOH         | 175.207       | CI1       | KAWXUB         | 174.7         | O4        | JULDEZ         | 174.362       | CI1       |
| GICLUB         | 175.207       | O27A      | YEJNUA         | 174.696       | O1        | TAZJAH         | 174.362       | O21       |
| ICUDUG         | 175.194       | O3        | ALOKIV         | 174.691       | N1B       | EVAJUI         | 174.352       | O5        |
| QEHZIP         | 175.184       | N1        | HAGKAE         | 174.688       | O6        | QIDQON         | 174.34        | O10       |
| HOLJAV         | 175.181       | F4        | FOFVIG         | 174.686       | O2        | UDIRIL         | 174.322       | N4        |
| NOPCOK         | 175.174       | O18       | ZISCEN         | 174.682       | N2A       | QUCGAY         | 174.321       | CI2       |
| CUBWIG         | 175.171       | O10       | DASPUJ         | 174.671       | O13B      | PANCUD         | 174.317       | S8        |
| HIYBEX         | 175.162       | N2A       | IXAJOH         | 174.668       | CI3       | SATYES         | 174.314       | O6        |
| ECUGOA         | 175.14        | O7        | EIQIQIG        | 174.656       | O3        | AFOHIN         | 174.307       | O2        |
| ZEQLAK         | 175.123       | O3        | TAXLIO         | 174.646       | O2        | QUIZAN         | 174.305       | O3        |
| VUMDOZ         | 175.11        | CI3       | PELQUT         | 174.639       | O1        | CUJFOF         | 174.303       | O6        |

|                |               |           |                |               |           |                |               |           |
|----------------|---------------|-----------|----------------|---------------|-----------|----------------|---------------|-----------|
| REXPAO         | 175.106       | O1        | COKXIK         | 174.625       | C12       | ISEMEZ         | 174.302       | O26       |
| QEHZEL         | 175.092       | N1        | MOSKAJ         | 174.625       | O6B       | WIGTEP         | 174.301       | N1        |
| <b>Refcode</b> | <b>∠YZnLB</b> | <b>LB</b> | <b>Refcode</b> | <b>∠YZnLB</b> | <b>LB</b> | <b>Refcode</b> | <b>∠YZnLB</b> | <b>LB</b> |
| VONTOK         | 175.051       | S1        | JAWPUV         | 174.621       | N12       | MIVDIF         | 174.3         | O8        |
| DELWUQ         | 175.048       | O8        | BAYYEI         | 174.617       | O3        | XASDAZ         | 174.288       | O12       |
| BINKUI         | 175.031       | O26       | DEBGEY         | 174.614       | O10       | FIDFUU         | 174.287       | C11       |
| LAPZOV         | 175.022       | N1B       | WIYCAL         | 174.61        | O12       | SESHUW         | 174.283       | N11       |
| FEJJOV         | 175.005       | O10B      | WASQIR         | 174.609       | O9        | SESHUW         | 174.264       | N7        |
| NANHAO         | 175.004       | O1        | MOFWUA         | 174.566       | O4        | IBONOD         | 174.263       | C12       |
| PAKVOM         | 174.959       | O3        | JAWQAC         | 174.557       | N10       | NUMLAK         | 174.263       | O5        |
| QUXLIF         | 174.946       | O3        | EYAYAG         | 174.548       | O15       | VUMVEH         | 174.259       | O4        |
| NEQDIW         | 174.939       | O5B       | XUSGUN         | 174.548       | O7        | RAQBAO         | 174.253       | O7        |
| MOHRAD         | 174.927       | O7A       | RAFWUS         | 174.547       | N5        | PIPKAC         | 174.24        | N2        |
| PERBOF         | 174.232       | N1        | DELWUQ         | 173.863       | S7        | TEWCOP         | 173.456       | O11       |
| GAKDAX         | 174.216       | O4        | PUDBUN         | 173.849       | N19       | VOFNOV         | 173.453       | N8        |
| MOSNEN         | 174.193       | C11       | GUXJAN         | 173.841       | O4A       | QELNOO         | 173.442       | As1       |
| KEPGOF         | 174.188       | O7        | ZZZDVY02       | 173.838       | O6F       | PANCUD         | 173.435       | S8        |
| NUJVAS         | 174.177       | N4        | QUXVUB         | 173.834       | O22       | LEWQOX         | 173.431       | C14       |
| UMIQOW         | 174.163       | O8        | KEMKAP         | 173.832       | C11       | REGQUT         | 173.431       | O12       |
| KAYYUG         | 174.162       | F10       | NIQLAC         | 173.826       | O24       | XULZIQ         | 173.429       | O26       |
| HATTEE         | 174.16        | S2        | JUGXER         | 173.804       | O2        | OZINIW         | 173.428       | O6        |
| QOCVIN         | 174.153       | F8        | TULLUJ         | 173.803       | P2        | JIQPAA         | 173.428       | F9        |
| RAFWUS         | 174.15        | N5        | GUDFIX         | 173.797       | O1        | ADIZAP         | 173.424       | O14       |
| QUCGAY01       | 174.15        | C12       | JOXNIT         | 173.788       | N3        | OHUTOC         | 173.419       | N4        |
| TOJLIN         | 174.149       | F36       | PIPKIK         | 173.777       | N2        | PUDCEY         | 173.416       | N20       |
| PEWLEK         | 174.142       | N1A       | SICVUZ         | 173.777       | N1        | EZUWOL         | 173.4         | N4        |
| GECVUI         | 174.123       | N1        | GABBOD         | 173.775       | O9        | XUSGUN01       | 173.396       | O3        |
| LIYDUS         | 174.122       | N8        | GIXPIQ         | 173.77        | N28       | BUYBED         | 173.386       | O2        |
| GUQLUA         | 174.122       | O60       | NABNAI         | 173.769       | N3        | NITVER         | 173.385       | O3        |
| TIQYAU         | 174.102       | F7        | AQOHAQ         | 173.768       | O4        | TAYHIN         | 173.384       | N4B       |
| YOSSOR         | 174.095       | C13       | FEXPOP         | 173.767       | O11       | EWESAC         | 173.382       | O4N       |
| OXOGUG         | 174.09        | Se4       | GIZFAZ         | 173.759       | O16       | LULXEX         | 173.379       | O6        |
| POGMIK         | 174.078       | O8J       | KAYZAN         | 173.747       | C11       | DUVHEJ         | 173.37        | O3        |
| NEMVAD         | 174.066       | O4        | HIBTOB         | 173.733       | O2        | JAWPUV         | 173.366       | N11       |
| MOJKAY         | 174.065       | C15       | QEKNAZ         | 173.727       | O4        | OXUROQ         | 173.366       | F1        |
| GUGYEP         | 174.056       | O10       | VEHLUQ         | 173.724       | O56       | IXEBIW         | 173.354       | O9        |
| OHUQAJ         | 174.025       | O21       | JAVCEP         | 173.705       | C11       | TOJBIF         | 173.349       | O11B      |
| CUYDEH         | 174.019       | O13       | FOFVIG         | 173.696       | O1        | JOBYEG         | 173.341       | O1        |
| MOJKAY         | 174.009       | C11       | EJOGAL         | 173.686       | N2        | BASZUU         | 173.335       | O48       |
| SESHUW         | 173.993       | N3        | KARSUS         | 173.684       | I5A       | TILQAH         | 173.326       | C11       |
| UJUNAO         | 173.99        | C11       | HESPOK         | 173.679       | N4        | XOQZEJ         | 173.312       | C11       |
| QORTID         | 173.985       | C13       | HESPOK10       | 173.679       | N4        | TEHDOA         | 173.308       | O3        |
| XUSGUN01       | 173.975       | O3        | BOCROD         | 173.652       | O7        | HAGQOV         | 173.299       | N3        |
| HESPOK         | 173.971       | O4        | BIPKUK         | 173.64        | O6        | IJIVAZ         | 173.296       | O1        |
| HESPOK10       | 173.971       | O4        | RUZVAJ         | 173.639       | C13       | OYOWIL         | 173.294       | N2        |
| QORFEI         | 173.969       | C11       | OKOKEG         | 173.616       | N5        | ROXCEP         | 173.286       | O2        |
| PEMBOY         | 173.963       | O11       | QITTIY         | 173.608       | F3        | WIJDAV         | 173.286       | O9B       |
| RUZSUA         | 173.961       | O13       | GECWIX         | 173.602       | N3        | XAVKEN         | 173.286       | O13       |
| ZASWEY         | 173.959       | N8        | MAQLEY         | 173.602       | O3        | RAHGUG         | 173.282       | O30       |
| HIRKOI         | 173.949       | F1        | KATQAX         | 173.589       | O8        | YEVKIU         | 173.274       | O4        |
| QUGFII03       | 173.941       | O8        | GANZEC         | 173.58        | S7        | VIJQUA         | 173.27        | F3        |
| XUGBOR         | 173.937       | O10       | WIQDEI         | 173.541       | N2        | CIDTUH         | 173.264       | O11       |
| FELJAK         | 173.934       | O9        | HEQQUR         | 173.534       | O2        | ESIRII         | 173.263       | O2        |
| EVUSEU         | 173.919       | O6        | RUVHOF         | 173.505       | O1        | UCAROH         | 173.25        | S1        |
| EJIPAP01       | 173.904       | N7        | LEZNUC         | 173.503       | O4B       | JUFEOE         | 173.244       | N4        |
| XASDIH         | 173.904       | O12       | ICUFES         | 173.502       | O2        | HUBMEZ         | 173.241       | C11       |
| DUCLUL         | 173.898       | N4        | SITCIH         | 173.501       | S1        | IFIYEC         | 173.241       | S4        |
| XALJIE         | 173.897       | O4        | YEJNEK         | 173.483       | O5        | ZETVEB         | 173.239       | S2        |
| UDOMIK         | 173.893       | N23       | LUGLII         | 173.481       | N5I       | OYOWEH         | 173.238       | N2        |
| SESHUW         | 173.89        | O1        | POSBEG         | 173.478       | O8        | MOJKAY         | 173.233       | O44       |

|                |               |           |                |               |           |                |               |           |
|----------------|---------------|-----------|----------------|---------------|-----------|----------------|---------------|-----------|
| MARDAN         | 173.887       | O34       | SARCUN         | 173.472       | O19       | SEGHER         | 173.224       | N6        |
| ZEQQEU         | 173.869       | N3        | XUSGUN         | 173.465       | O7        | JAVJIA         | 173.2         | N10       |
| <b>Refcode</b> | <b>∠YZnLB</b> | <b>LB</b> | <b>Refcode</b> | <b>∠YZnLB</b> | <b>LB</b> | <b>Refcode</b> | <b>∠YZnLB</b> | <b>LB</b> |
| MATVAG         | 173.2         | O4        | MOJKAY         | 172.89        | O30       | RAPRIN         | 172.558       | O1        |
| LUGLII         | 173.197       | N5        | IFATEO         | 172.881       | N2F       | ZUYNAL         | 172.552       | O17       |
| HOXMIQ         | 173.182       | O1        | BAQHEG         | 172.873       | O3        | QIRKOT         | 172.524       | N2        |
| XUPROR         | 173.182       | O8        | KATHUM         | 172.87        | O4        | MOJKAY         | 172.524       | O4        |
| UKEHOJ         | 173.18        | O21       | SEBBAF         | 172.858       | O17       | HIYQOW         | 172.516       | N2        |
| SESFAY01       | 173.16        | O3        | OCIFUE         | 172.849       | N4        | ABAYUY         | 172.514       | O5        |
| RUZVIR         | 173.152       | CI4       | RUZTOV         | 172.845       | CI1       | MOJKAY         | 172.501       | CI8       |
| MURJIV         | 173.148       | N7        | TILQAH         | 172.833       | Te1       | FICBOM         | 172.5         | N3E       |
| SESFAY         | 173.148       | O2        | KEMKET         | 172.831       | O8        | LMETZN01       | 172.498       | O2        |
| TECROK         | 173.139       | S1        | LOSCEC         | 172.824       | O6        | PUPVEC         | 172.497       | O4        |
| FAXCUF         | 173.136       | O3        | QOFKIF         | 172.815       | O10       | SESHUW         | 172.492       | O10       |
| LUKFUU         | 173.125       | CI1       | GUQLUA         | 172.806       | O70       | GABBOD         | 172.491       | N4        |
| FOWQEQ         | 173.124       | O4        | LMETZN         | 172.797       | O4A       | CUBFAH         | 172.491       | O1        |
| HIYBEX         | 173.112       | N6        | KIRMOR         | 172.793       | O17       | IQEJUK         | 172.47        | O5        |
| MODZOX         | 173.108       | O5        | GOWGOQ         | 172.78        | N4        | LOVQUI         | 172.47        | O9        |
| COLBUB         | 173.107       | N9        | RUZVAJ         | 172.776       | O12       | FEDYEU         | 172.456       | O8        |
| DEFHUT         | 173.1         | O7        | OQEYUG         | 172.764       | O5        | TEXTEW         | 172.448       | N7        |
| HIYQUC         | 173.09        | N5        | MIMSOS         | 172.761       | N9        | ZIXLOK         | 172.441       | N3        |
| NAHGUA         | 173.088       | CI1       | QUCYUJ         | 172.756       | N3        | ODUSEL         | 172.433       | O15       |
| NILYUG         | 173.083       | O15       | YATKAG         | 172.753       | O5        | ASALIP         | 172.418       | N2        |
| SIYKUI         | 173.081       | F12       | BOSQIK         | 172.747       | O3        | PIXWOL         | 172.396       | O2        |
| NETFUQ         | 173.072       | O4        | BAYYEI         | 172.744       | O12       | ESISIK         | 172.387       | O1        |
| ISODUP         | 173.061       | CI2       | PEMBOY         | 172.742       | O6        | QOPHAF         | 172.385       | O5        |
| MOJKAY         | 173.059       | CI2       | RAJPAU         | 172.735       | S2        | GUXJER         | 172.38        | O5A       |
| IQUMIQ         | 173.054       | O4        | XOZGIE         | 172.731       | O1        | LEZVIW         | 172.371       | O18       |
| XUXQEN         | 173.048       | O10       | MEMNUN         | 172.724       | F1        | HIBTOB01       | 172.366       | O2        |
| QUSVEF         | 173.041       | CI1       | QORJIQ         | 172.721       | O5        | JOFMAV         | 172.343       | O6        |
| MOSNEN         | 173.039       | O5        | YUKJET         | 172.718       | CI4       | GIXPIQ         | 172.339       | N23       |
| GABXUE         | 173.037       | N8        | YATKAG         | 172.715       | O2        | JIPGOF         | 172.337       | CI11      |
| YOBHOP         | 173.017       | N5        | JAWQAC         | 172.692       | N11       | MARDAN         | 172.324       | O26       |
| KUBTIL         | 173.015       | O19       | UGADIP         | 172.691       | O11       | MOJKAY         | 172.322       | O86       |
| BEMHAG         | 173.007       | O7        | MOSNEN         | 172.687       | CI1       | QUBZOD         | 172.32        | O7        |
| NAKPUM         | 173.007       | O4        | IGAVAN         | 172.684       | O4        | RORSOI         | 172.318       | N4        |
| MEHZUU         | 172.992       | N2        | PUWKUP         | 172.676       | O2A       | IQAGUC01       | 172.315       | S1A       |
| VONCOR         | 172.97        | CI3       | QOYZUC         | 172.672       | S1        | DAFYIW         | 172.312       | O11       |
| DAJMEJ         | 172.967       | N2        | VIVNOF         | 172.67        | O2        | UGIPAC         | 172.307       | N8        |
| YEGDIA         | 172.962       | F2        | EWEQEC         | 172.655       | CI3       | FIZWAO         | 172.304       | O5        |
| KIGBIL         | 172.955       | O4        | FOMCUH         | 172.649       | O1        | ODUROU         | 172.302       | O13       |
| MUJKEI         | 172.955       | O16       | UGIPAC         | 172.646       | N4        | MUJKEI         | 172.291       | O13       |
| HIYBIB         | 172.953       | N2        | WEWKEO         | 172.646       | F13       | OMOCOK         | 172.287       | N5        |
| KEHLAO         | 172.953       | CI1       | LEZVIW         | 172.638       | O13       | NEPMIF         | 172.275       | O1        |
| MOJKAY         | 172.95        | O55       | VISCEG         | 172.619       | N9        | CTAZZN         | 172.271       | O4        |
| VIWJUH         | 172.946       | N3        | DEHPEN         | 172.606       | O2        | RAXNAH         | 172.263       | O7        |
| UDITUZ         | 172.937       | CI1       | RIRWOH         | 172.603       | I2        | ZUBZEB         | 172.262       | O6        |
| PIJKAV         | 172.936       | O5        | XIZFAR         | 172.596       | N7        | QOFKIF         | 172.255       | O19       |
| TULLUJ         | 172.932       | P1        | CAFSAF         | 172.594       | O3        | JAWPUV         | 172.252       | N10       |
| XULFEQ         | 172.917       | O7        | WINFEF         | 172.593       | N3        | IQAGUC         | 172.249       | S2A       |
| CUHKUN         | 172.904       | O8        | RUZSUA         | 172.584       | O16       | ROMQAN         | 172.244       | O14       |
| CEZRIM         | 172.892       | N3        | WALBOC         | 172.566       | O8        | DAMSUH         | 172.225       | CI4       |
| DECCUM         | 172.219       | N2        | TOPYEE         | 171.876       | N1        | AFUWEG         | 171.604       | O7        |
| XALXOX         | 172.188       | CI1       | AEPYZN         | 171.876       | O3        | QIBNOE         | 171.604       | O11A      |
| QUXLIF         | 172.18        | CI1       | RUZVIR         | 171.869       | CI3       | WABBEI         | 171.602       | O1        |
| ZERVIE         | 172.172       | O1        | VAXBAY         | 171.865       | O24       | YISMUM         | 171.593       | N7        |
| ADABOW         | 172.159       | N2        | XEXVON         | 171.858       | N19       | YEJBAS         | 171.588       | O3        |
| COYYAS         | 172.156       | N2        | SUWBOC         | 171.856       | CI1       | ETIDOD         | 171.585       | O2A       |
| COVQIQ         | 172.151       | O11       | SIBMEW         | 171.856       | O1        | BELCAZ         | 171.572       | CI2       |
| IGAVAN         | 172.123       | O8        | NUWRIH         | 171.855       | N4        | UNABAN         | 171.567       | O2        |

|                |               |           |                |               |           |                |               |           |
|----------------|---------------|-----------|----------------|---------------|-----------|----------------|---------------|-----------|
| WIBVOS         | 172.117       | CI1       | WALBOC01       | 171.854       | O6        | XIDNOP         | 171.567       | O2        |
| ROBCEQ         | 172.117       | O40       | IJOYEN         | 171.818       | O12       | VIZPAY         | 171.561       | N13       |
| <b>Refcode</b> | <b>∠YZnLB</b> | <b>LB</b> | <b>Refcode</b> | <b>∠YZnLB</b> | <b>LB</b> | <b>Refcode</b> | <b>∠YZnLB</b> | <b>LB</b> |
| ROFLUW         | 172.106       | N6        | DIWREJ         | 171.814       | O1        | GUNGUU         | 171.556       | O10       |
| RUZTEL         | 172.106       | CI1       | RUWMED         | 171.801       | N35       | VEKFUQ         | 171.55        | N2        |
| IGAVAN01       | 172.096       | O1        | QOFKIF         | 171.798       | CI1       | RIDWUX         | 171.548       | O47       |
| ZETVEB         | 172.096       | S1        | MIQVEP         | 171.784       | N2        | HOXTUL         | 171.547       | O6        |
| HALXAT         | 172.094       | O1        | XUSGEA         | 171.776       | O19       | YENVEV         | 171.544       | N3        |
| XUSGUN01       | 172.092       | O4        | QIBNOE02       | 171.772       | O3A       | GOBJAK         | 171.533       | N7        |
| XUMFIW         | 172.083       | N6A       | TAZJAH         | 171.768       | O39       | EZUWOL01       | 171.527       | N3        |
| EWEQEC         | 172.083       | CI4       | QIBNOE01       | 171.765       | O5A       | MARDAN         | 171.525       | O30       |
| YUKJET         | 172.081       | CI2       | EYURUN         | 171.745       | O2        | RUZSUA         | 171.519       | CI3       |
| ICUFOC         | 172.081       | O4        | DUVHIN         | 171.738       | O3        | TILTAN         | 171.519       | I10       |
| IXOQAQ         | 172.08        | N6        | TUFHAE         | 171.735       | O12       | MOSNOX         | 171.516       | O4        |
| JEBTUG         | 172.051       | N5        | KATVOR         | 171.733       | O9        | LEZVIW         | 171.512       | O18       |
| WAVDAY         | 172.047       | O9        | QAFSUM         | 171.732       | CI1D      | YEGYUH         | 171.512       | Se3       |
| SITVUN         | 172.045       | O2        | XUSGUN         | 171.727       | O5        | VIQYEA         | 171.51        | O3        |
| PIFDIS         | 172.044       | I2        | RECKOD         | 171.726       | N4        | POFLED         | 171.505       | N2        |
| XEHTUA         | 172.043       | O7C       | EFUJIA         | 171.723       | N7        | MOJKAY         | 171.503       | CI4       |
| EYERAB         | 172.037       | O6        | SINXEU         | 171.719       | O3A       | MIGNUN         | 171.502       | O4        |
| EBAWAH         | 172.03        | O7        | QUCRIQ         | 171.718       | O7        | RIDWUX         | 171.501       | O41       |
| BAMZAR         | 172.019       | O2        | NAWTEO         | 171.702       | O12       | XUXQAJ         | 171.5         | O4        |
| WEBRUT         | 172.018       | O7        | TESNUC         | 171.7         | O5D       | AHOFUZ         | 171.48        | O6        |
| HARHOA         | 172.006       | N3        | IDAVAN         | 171.685       | N2        | DASSIZ         | 171.479       | O2        |
| TEYCOS         | 171.997       | CI11      | HAWBEN         | 171.678       | N9        | FOYMUE         | 171.467       | N12       |
| CEGFIE         | 171.996       | N2        | UPIGAC         | 171.674       | O10       | MOSNEN         | 171.461       | O5        |
| HAGJIK         | 171.991       | CI1       | ZINWUO         | 171.666       | O6        | NAMGOY         | 171.454       | N2A       |
| TAZJAH         | 171.988       | O7        | ZINWUO10       | 171.666       | O6        | CIWVAG         | 171.452       | N8        |
| MCYSZN         | 171.982       | O2A       | LALHUD         | 171.655       | CI1       | BAMWUJ         | 171.437       | F2        |
| QELNOO         | 171.979       | Se3       | ZAZKIU         | 171.647       | O2        | LIJQOM         | 171.431       | N12       |
| IJEDIL         | 171.978       | O15       | CORCIX         | 171.646       | F3        | POCXIO         | 171.427       | CI2       |
| TESNUC         | 171.975       | O7        | RIHDUJ         | 171.642       | O4        | HIYQOW         | 171.424       | N6A       |
| WEMPAG         | 171.974       | N8        | MARDAN         | 171.64        | O12       | MEMXEH         | 171.42        | N5        |
| SARCIA         | 171.924       | O31       | UQULUQ         | 171.636       | O5        | RUWMON         | 171.412       | F13       |
| RORSOI         | 171.919       | N3        | GUPWOE         | 171.636       | S1        | RIDWUX         | 171.399       | O41       |
| AGOKOY         | 171.917       | I4        | JAWQAC         | 171.626       | N9        | BERYAC         | 171.397       | O8        |
| GABBOD         | 171.911       | N4        | UJEYIT         | 171.626       | O17       | RUCPAH         | 171.396       | CI1       |
| GOBJAK         | 171.909       | N17       | LOSCEC         | 171.622       | O5        | JARKUM         | 171.39        | N1        |
| OJOXUH         | 171.907       | N1        | QIBYUZ         | 171.621       | O2        | MOJKAY         | 171.389       | CI4       |
| IGAVAN01       | 171.902       | O7        | HALWOG         | 171.612       | N5        | TUDGUX         | 171.372       | O4        |
| OPPAZN         | 171.898       | O11       | FUJNEF         | 171.612       | O13       | CAYWEG         | 171.366       | O16       |
| UNAGUN         | 171.878       | N1        | NOLGIG         | 171.608       | O5A       | PULWOJ         | 171.352       | S1        |
| MOJKAY         | 171.346       | O62       | AGOHIP         | 171.026       | N4        | GAGSOY         | 170.778       | N7        |
| ROBCEQ         | 171.322       | O30       | TAVDUS         | 171.015       | N7        | HARHUG         | 170.778       | N3        |
| DUJTUA         | 171.316       | N5        | SUSPOL         | 171.005       | O1        | TIVJIT         | 170.77        | O22       |
| FIDFUU         | 171.313       | O7        | KEHLAO         | 171.004       | O2        | KENJEU         | 170.768       | O4        |
| KARDEO         | 171.307       | O4        | AREGAF         | 171.002       | O1        | EFASUA         | 170.766       | O23       |
| XABRIE         | 171.306       | O8        | JUZQAY         | 171           | I3        | IWEMUT         | 170.764       | O6        |
| FAXYUC         | 171.287       | CI1       | BUBYOO         | 171           | S1        | ETEJOF05       | 170.762       | CI2       |
| IQERAA         | 171.287       | O3C       | BIZDAT         | 170.995       | O3        | XEKGEB         | 170.757       | O5        |
| HINJIY         | 171.275       | N5        | ETEJOF02       | 170.991       | CI2       | GUPWUK         | 170.748       | S1        |
| PURLUM         | 171.272       | F4        | VIRJEN         | 170.987       | F7        | RUZVOX         | 170.743       | CI2       |
| HOQJUS         | 171.27        | N1        | KAPWUV         | 170.986       | O78       | UNAGUN         | 170.741       | N2        |
| RORSIC         | 171.268       | CI1       | PIKVIR         | 170.973       | N3        | UNAGOH         | 170.735       | N1        |
| KITZOD         | 171.249       | CI1       | QORFAE         | 170.967       | CI1       | WARFAX         | 170.735       | O8        |
| BUSFON         | 171.244       | N5        | UGUKUD         | 170.967       | O3C       | QARSIL01       | 170.733       | N6        |
| OQITUE         | 171.237       | CI4       | IBUHIY         | 170.953       | As2A      | JANLUF         | 170.733       | O4        |
| WEDYUB         | 171.231       | O8        | RUWMED         | 170.952       | O63       | WUWGON         | 170.725       | O5        |
| BOQPIG         | 171.227       | CI1       | BOJBAE         | 170.922       | N5        | GIZTEQ         | 170.72        | O3B       |
| MUZVUY         | 171.227       | CI4       | MARDAN         | 170.922       | N12       | KUBTIL         | 170.719       | O5        |

|                |               |           |                |               |           |                |               |           |
|----------------|---------------|-----------|----------------|---------------|-----------|----------------|---------------|-----------|
| GIZTEQ         | 171.225       | N6B       | NIPHEZ         | 170.921       | O1        | MOJKAY         | 170.719       | O1        |
| SUWBOC         | 171.206       | O12       | YOLYIK         | 170.919       | O8        | MOJKAY         | 170.714       | O21       |
| <b>Refcode</b> | <b>∠YZnLB</b> | <b>LB</b> | <b>Refcode</b> | <b>∠YZnLB</b> | <b>LB</b> | <b>Refcode</b> | <b>∠YZnLB</b> | <b>LB</b> |
| QAXGOP         | 171.204       | N1        | KAMLER         | 170.915       | O22       | DOSVAJ         | 170.7         | O4        |
| WENWUI         | 171.199       | N1        | PAGSUP         | 170.907       | N1D       | LAFQEP         | 170.7         | O3        |
| MUGYUJ         | 171.192       | F2        | MIQVAL         | 170.902       | N2        | GUCYOT         | 170.692       | O6        |
| FUMGOL         | 171.183       | O12       | NOZLIX         | 170.902       | O2        | WALBOC02       | 170.68        | O6        |
| QOCVIN         | 171.177       | F6        | TIVJIT         | 170.897       | O49       | WUWSIT         | 170.68        | O11       |
| HEQQUR         | 171.167       | N6        | OQITUE         | 170.891       | O1        | XULZIQ         | 170.675       | O8        |
| MOJKAY         | 171.156       | O32       | TOJLIN         | 170.89        | F8        | MAKYUS         | 170.648       | O6        |
| KUBVIO         | 171.149       | O5        | MATVAG         | 170.887       | O3        | JEXQEJ         | 170.645       | O14       |
| ADIGUQ         | 171.135       | O3A       | NOBHIX         | 170.882       | N6        | MUVVUW         | 170.642       | F3        |
| HYZCZN         | 171.129       | O3        | XARWOE         | 170.882       | N5        | GUPWOE         | 170.641       | S1        |
| REGQUT         | 171.129       | O9        | PIBCEL         | 170.87        | N1        | MARDAN         | 170.639       | O5        |
| JARKUM         | 171.117       | N4        | SESHUW         | 170.869       | O6        | PAHQAU         | 170.639       | O12       |
| UCAROH         | 171.111       | S3        | HATVOQ         | 170.867       | O2        | HESPOK         | 170.638       | O1        |
| SOPWIF         | 171.104       | O6        | COFDAE         | 170.866       | O4        | HESPOK10       | 170.638       | O1        |
| LJUREC         | 171.102       | N1C       | DEHPOX         | 170.861       | O6        | QUSVIJ         | 170.632       | O5        |
| NUCDIZ         | 171.1         | O10       | CEWCAJ         | 170.854       | O6        | WOJJEK         | 170.627       | O4        |
| KEPGOF         | 171.091       | O8        | RICKIA         | 170.846       | N4        | JARKOG         | 170.623       | O3        |
| PIBBUA         | 171.09        | O6        | MUGYUJ         | 170.831       | F12       | CIWVAG         | 170.621       | Cl1       |
| ETEJOF03       | 171.089       | Cl2       | BIPKUK         | 170.828       | O4        | VUFZAA         | 170.617       | N4        |
| QIBYEJ         | 171.088       | Cl4       | HETBUE         | 170.828       | O7        | SARCIA         | 170.611       | O6        |
| JALZIG         | 171.078       | S1        | GOBJAK         | 170.826       | O6        | VUMVIL         | 170.606       | N1        |
| ETEJOF04       | 171.074       | Cl2       | PAPHEV         | 170.825       | N4        | QANCAJ         | 170.591       | O3        |
| NEPNON         | 171.064       | N3        | WASFIF         | 170.824       | O4        | QEJVUW         | 170.591       | O5        |
| UJIRUB         | 171.061       | O3        | EKOBUK         | 170.817       | O2        | XOQZUZ         | 170.591       | O2        |
| NUDXOC         | 171.055       | O1        | WEKLOP         | 170.817       | O4C       | XACRUQ         | 170.582       | O5        |
| YAFJAS         | 171.051       | O6        | KERYEN         | 170.817       | F1        | MIKCEP         | 170.579       | O8        |
| FODROG         | 171.034       | N6        | KAXXEO         | 170.806       | O6        | VELROV         | 170.571       | Cl2       |
| TOJBIF         | 171.03        | O12B      | EPITEF         | 170.793       | N4        | NUWPAZ         | 170.566       | N1        |
| JAWQAC         | 171.029       | N12       | XUGDEK         | 170.779       | O6        | MUHHUT         | 170.56        | F7        |
| NEMTUV         | 170.555       | O5        | LERNAZ         | 170.189       | O7        | GOBJAK         | 169.888       | O10       |
| LORKUZ         | 170.549       | N5        | BAYTUT         | 170.184       | N3        | AWUCUQ         | 169.882       | N7        |
| DURDOM         | 170.541       | N5        | JOBPUL         | 170.184       | O5        | BIMDOT         | 169.879       | O12       |
| VAVBUQ         | 170.531       | O9        | JUFLON         | 170.183       | N11       | AGOJOX         | 169.869       | O3        |
| MEFZAC         | 170.522       | Cl2       | FUJBOD         | 170.18        | O7        | ELIYUU         | 169.862       | N3        |
| ETEJOF01       | 170.513       | Cl4       | MARDAN         | 170.162       | O22       | OFOMEE         | 169.859       | O5        |
| RAFWUS         | 170.503       | O8        | ZINLUG         | 170.154       | O15       | MUZVUY         | 169.858       | Cl3       |
| BINKUI         | 170.501       | S13       | UZOKUR         | 170.149       | O10D      | YATKAG         | 169.847       | N7        |
| OPXZND         | 170.495       | S1B       | GEGYAW         | 170.149       | F7        | PAKVOM         | 169.847       | O2        |
| XASDAX         | 170.451       | O11       | WUZFIH         | 170.144       | O2        | DATFUZ         | 169.84        | O6        |
| MEFWON         | 170.445       | Cl1       | KEMKET         | 170.137       | O14       | XUCHAF         | 169.833       | N1        |
| ZUSJII         | 170.439       | O4        | OMIDAQ         | 170.132       | O2        | OYAPOV         | 169.832       | O3        |
| HIYBIB         | 170.438       | N6A       | GEVFAR         | 170.123       | O5        | NOZLIX         | 169.824       | Cl2       |
| PEDXOM         | 170.433       | O2        | HIBHEJ         | 170.103       | O4        | JAIXOI         | 169.818       | O12       |
| DOQTIO         | 170.422       | N1A       | AGUJOC         | 170.102       | N3        | QUTCIT         | 169.818       | S2        |
| QAHHEP         | 170.419       | Cl1       | BOJYAD         | 170.098       | O4        | LAJFIN01       | 169.817       | S3        |
| RAJHIU         | 170.414       | O5        | NOBYIO         | 170.096       | O14       | ADOKEN         | 169.816       | O11       |
| YEFMUS         | 170.404       | N1        | LUNXIC         | 170.083       | N2        | MOJKAY         | 169.808       | O16       |
| YEFMUS01       | 170.404       | N1        | MULMOX         | 170.07        | O8        | FALZOL         | 169.807       | N3        |
| GOSNAG         | 170.404       | O5A       | RUHWIA         | 170.065       | O8        | YEXNOH         | 169.801       | N1        |
| ARUPUB         | 170.403       | O3        | XOMPAR         | 170.052       | N1        | KEXWAP         | 169.768       | Cl2       |
| ITALIZ         | 170.369       | S3        | YIKGIL         | 170.051       | O4        | PIKTUB         | 169.763       | N7        |
| NACZEW         | 170.363       | O16       | GETNUS01       | 169.999       | O5        | OCEYEB         | 169.757       | N1C       |
| MIQVAL         | 170.361       | N2        | FIQRUT         | 169.998       | O31       | YACFUE         | 169.751       | N2        |
| GIXNOU         | 170.355       | N3        | YOBHOP         | 169.992       | N2        | ZAZKIU         | 169.749       | O1        |
| ETEJOF         | 170.352       | Cl3       | DAWQIE         | 169.988       | O7        | PEBMES         | 169.745       | Cl5       |
| KEYXAO         | 170.342       | O13       | WEKMAC         | 169.986       | O3B       | BEMHAG         | 169.739       | Cl1       |
| UMOLAJ         | 170.342       | O5        | XUSGAW         | 169.98        | O20       | ZASVUN         | 169.726       | N8        |



|                |               |           |                |               |           |                |               |           |
|----------------|---------------|-----------|----------------|---------------|-----------|----------------|---------------|-----------|
| YEQSOF         | 170.339       | O6        | ERIRAZ         | 169.979       | O5        | GETNUS         | 169.726       | O5        |
| WEMNIN         | 170.329       | N5A       | WEZJAN         | 169.968       | O5B       | MESSIN         | 169.724       | N5        |
| <b>Refcode</b> | <b>∠YZnLB</b> | <b>LB</b> | <b>Refcode</b> | <b>∠YZnLB</b> | <b>LB</b> | <b>Refcode</b> | <b>∠YZnLB</b> | <b>LB</b> |
| CUBFAH         | 170.327       | CI2       | NAHGIO         | 169.965       | O16       | OYOWEH         | 169.723       | N3        |
| PICBAE         | 170.325       | CI2       | UNAGOH         | 169.946       | N2        | WARDUP         | 169.721       | O5        |
| CIWVAG         | 170.306       | O3        | JOXNIT01       | 169.939       | N3        | SIQZOL         | 169.714       | O6        |
| WIZMAT         | 170.295       | CI2       | JUZBUE         | 169.934       | N3        | KENKAR         | 169.713       | O1        |
| ZAHSUZ         | 170.285       | F8        | DAKZEY01       | 169.934       | O100      | WAVDAY         | 169.713       | O2        |
| ICUFIW         | 170.275       | O1        | COLBUB         | 169.926       | N17       | IDUJAT         | 169.704       | O6        |
| NABNAI01       | 170.254       | N3        | NIQLAC         | 169.925       | O24       | SEGDIT         | 169.701       | O15       |
| EREJOD         | 170.248       | O5        | MUDKOM         | 169.922       | N5G       | FASWED         | 169.694       | O22       |
| VOWYAJ         | 170.243       | CI3       | KEPPOO         | 169.913       | N3        | AGOHOV         | 169.68        | O1        |
| XUNWIM         | 170.243       | CI2       | IXUCUA         | 169.913       | CI1       | QIDQUT         | 169.68        | O14       |
| HUZZUY         | 170.239       | O1A       | HAZZEP         | 169.911       | O5        | YOLYIK         | 169.678       | CI1       |
| YEKXAR         | 170.238       | O2        | KALJEN         | 169.911       | O6        | DEKCEF         | 169.678       | O3        |
| SUWBOC         | 170.237       | O3        | XUXPAI         | 169.91        | O9        | NONNEM         | 169.676       | O1        |
| KAPBEJ         | 170.227       | O4        | VUQXUD         | 169.907       | O7A       | QITRET         | 169.676       | O1        |
| UCUJIO         | 170.224       | O21       | ASUXUJ         | 169.905       | O7        | UZUYEV         | 169.672       | N7        |
| ZZZDVY03       | 170.222       | O6A       | OVESAL         | 169.905       | F1        | XASDAX         | 169.665       | O10       |
| BERYAC         | 170.22        | CI2       | ZNTATE10       | 169.901       | S2        | NUDNIL         | 169.661       | O20       |
| EYURUN         | 170.204       | CI2       | PEWGOO         | 169.895       | CI3       | MUHVIW         | 169.646       | O4        |
| SUPLAR         | 170.202       | N1        | DAMSUH         | 169.895       | O3        | YEKVAP         | 169.636       | N2        |
| TALZEM         | 169.63        | CI2       | XIDSOW         | 169.342       | N2        | PUWKUP         | 169.15        | O9        |
| EMAQOB         | 169.628       | O6        | JIDWOL         | 169.34        | N7        | DEBSUZ         | 169.146       | O41       |
| KENJUK         | 169.627       | O1        | RORSEY         | 169.34        | S1        | QUSVEF         | 169.142       | O2        |
| KARSUS         | 169.62        | I2        | FAYROM         | 169.337       | N7        | GAKDAX         | 169.129       | O1        |
| DOHJES         | 169.586       | O9        | CAZFAO         | 169.334       | N1        | GUPBOK         | 169.126       | O5A       |
| FIZWAO         | 169.586       | O6        | NOJPIN         | 169.334       | N3        | JONNUY         | 169.121       | N7        |
| JETGIC         | 169.572       | N4        | IDAQIP         | 169.333       | O4        | GUVFUY         | 169.121       | O4        |
| VOWXUC         | 169.572       | O1        | WASQJR         | 169.33        | P1        | WEMZUJ         | 169.105       | O5        |
| MIQVEP         | 169.569       | N2        | VAJXAI         | 169.327       | O3A       | XUZHEG         | 169.103       | N1        |
| VAXBAY         | 169.569       | O19F      | GUPWOE         | 169.322       | S2        | JAKPAN         | 169.103       | O7        |
| NECVAT         | 169.567       | CI2       | DEZJUR         | 169.314       | N3        | YOWPOP         | 169.097       | N1        |
| UDOMIK         | 169.564       | N14       | ZUBZAX         | 169.308       | O6        | SIYGAK         | 169.093       | N5        |
| XASCUQ         | 169.556       | O6        | CECGID         | 169.301       | S4        | KERYIR         | 169.093       | F4        |
| RAHGUG         | 169.539       | O21       | OYOWIL         | 169.298       | N1        | YOCKUW         | 169.078       | O4        |
| UDOMIK         | 169.536       | N21       | KAGRET         | 169.295       | N3        | NUWXAF         | 169.075       | N9        |
| PERZAN         | 169.536       | O20       | EROTAJ         | 169.291       | O6        | AXOKED         | 169.07        | N6        |
| JAHNUE         | 169.524       | N4        | IFIXIE         | 169.291       | O5        | OKUXUQ         | 169.068       | O6        |
| EYEHEW         | 169.516       | S1        | QUSVEF         | 169.287       | O5        | MIKBUE         | 169.057       | O7        |
| IGUCOE         | 169.509       | N1        | SARZER         | 169.287       | S1        | ZZZDVY04       | 169.057       | O4        |
| SOPNOB         | 169.509       | O5        | EBUBEL01       | 169.283       | O7        | YOCKUW         | 169.054       | O5        |
| ADIZAP         | 169.507       | CI1       | FIKNIX         | 169.275       | O10       | EQOVIP         | 169.051       | F2        |
| IWIBOH         | 169.506       | CI3       | UVUFEY         | 169.275       | O5        | GICTAN         | 169.043       | O10       |
| KEPPEE         | 169.505       | N3        | WINGIL         | 169.274       | O3B       | CODVAV         | 169.037       | N3        |
| GUPWOE         | 169.491       | S2        | BEFHUS         | 169.266       | N8        | EYERAB         | 169.037       | O32       |
| RUWMED         | 169.487       | O40       | VEKFUQ         | 169.262       | N3        | ADIZAP         | 169.034       | CI7       |
| OYOWIL         | 169.483       | N19       | LAJFIN         | 169.262       | S2        | QORJIQ         | 169.029       | CI1       |
| DAKZEY01       | 169.477       | O99       | WUWRIS         | 169.25        | O11G      | CESKUK         | 169.02        | CI2       |
| DAJCIE         | 169.443       | O4        | GUVFUY         | 169.243       | O5        | WETFIN         | 169.008       | O9        |
| JOBPUL         | 169.44        | S1        | IQIBAN         | 169.24        | O12       | WITFEM         | 169.006       | N3        |
| RIXWED         | 169.437       | F5        | ODUSEL         | 169.224       | O15       | ADEVOV         | 168.995       | O3A       |
| FEDYAQ         | 169.425       | O8        | LINVOW         | 169.224       | F38       | NOKDIA         | 168.994       | O5        |
| NIJTIJ         | 169.415       | O5        | CISWAD         | 169.211       | F4        | EMECUV         | 168.991       | N3        |
| RUWMON         | 169.413       | O5F       | TIVJIT         | 169.207       | O54       | DAKZEY01       | 168.987       | O100      |
| PUDBAT         | 169.411       | O3        | PEPHID         | 169.205       | O1        | JIWKOQ         | 168.975       | N16       |
| JILRAB         | 169.41        | N1        | SATYES         | 169.199       | CI2       | JAWDOD         | 168.971       | CI9       |
| MUVVUW         | 169.397       | F1        | JUYROM         | 169.198       | O2C       | CAFSAF         | 168.962       | CI1       |
| VEZYOR         | 169.395       | O1        | LERNAZ         | 169.197       | CI3       | HUVHUD         | 168.962       | O7        |
| XEQNIR         | 169.395       | O4        | EBEZAQ         | 169.192       | N1        | SIYFOX         | 168.96        | N5        |

|                |               |           |                |               |           |                |               |           |
|----------------|---------------|-----------|----------------|---------------|-----------|----------------|---------------|-----------|
| KARSUS         | 169.394       | I4A       | GOSPOV         | 169.188       | S1        | ADIZAP         | 168.957       | O24       |
| CISMAU         | 169.391       | O6        | UMAWOV         | 169.174       | O9        | LOSLAG         | 168.951       | N10       |
| <b>Refcode</b> | <b>∠YZnLB</b> | <b>LB</b> | <b>Refcode</b> | <b>∠YZnLB</b> | <b>LB</b> | <b>Refcode</b> | <b>∠YZnLB</b> | <b>LB</b> |
| UJIRUB         | 169.382       | CI1       | EYERAB         | 169.167       | O18       | WEMNIN         | 168.95        | N6A       |
| OYOWIL         | 169.376       | N3        | IDUJAT         | 169.167       | S1        | UQETUI         | 168.945       | N7        |
| KAWXUB         | 169.37        | CI1       | FEDYEU         | 169.164       | CI1       | GOJWIM         | 168.943       | O12       |
| SIXJER         | 169.37        | I1        | LUBPEG         | 169.16        | O13       | SUWBOC         | 168.94        | O5        |
| MEGNUK         | 169.357       | O3F       | YIHHAB         | 169.159       | F2        | HOTVAO         | 168.938       | Se1B      |
| WUZFIH         | 169.351       | CI6       | PUGTOC         | 169.157       | N11       | IGUDEV         | 168.935       | O8        |
| EFUJIA         | 169.349       | O3        | FAYROM01       | 169.156       | N7        | DANNOY         | 168.932       | O11       |
| XARWOE         | 169.347       | N1        | JILRAB         | 169.154       | N3        | XOLQOE         | 168.931       | O5        |
| VUQXOX         | 169.343       | O6A       | FAKTIY         | 169.153       | N7        | MARDAN         | 168.921       | O24       |
| ITESUY         | 168.92        | N1C       | TOTVEF         | 168.674       | N4K       | AVIMOI         | 168.44        | O16       |
| FIYSAI         | 168.912       | O2        | VUNJAR         | 168.669       | N4        | FAVQOK         | 168.437       | O11       |
| CIYJOK         | 168.908       | O9        | XEHFIC         | 168.669       | O4        | LIDWAA         | 168.436       | O26       |
| JIWKQO         | 168.897       | N7        | XUHMOE         | 168.666       | O4        | ZASVAT         | 168.433       | N4        |
| FEXBOD         | 168.894       | O1        | YEJGOL         | 168.666       | O2        | PEMBOY         | 168.423       | CI2       |
| MIGXEI         | 168.893       | N2        | MIPYEQ         | 168.661       | N7        | GESLEX         | 168.409       | N4        |
| SEQHAY         | 168.893       | CI3       | RAXSIU         | 168.661       | O8        | ZUBZEB         | 168.405       | O4        |
| VAZZII         | 168.891       | O20       | IDEHAC         | 168.659       | O3A       | VENTOB         | 168.397       | O7        |
| BTCBZN         | 168.888       | S1        | VEXTUP         | 168.657       | O26       | SOPNOB         | 168.395       | CI1       |
| LEVZUL         | 168.887       | N1        | QAKKOD         | 168.656       | CI1       | KAQTAA         | 168.386       | N2        |
| SUSXUA         | 168.886       | N3        | MAKCIM         | 168.639       | O9        | PUKTUM         | 168.386       | O9        |
| KIZGIL         | 168.867       | O17       | OGIMOG         | 168.632       | N3        | JUCKOK         | 168.385       | N1        |
| LIMGIB         | 168.849       | N3        | OKUXUQ         | 168.63        | O8        | ATOGOF         | 168.381       | O4B       |
| DOLVOP         | 168.848       | S3        | WIBHAS         | 168.629       | O3        | BABBEM         | 168.378       | N7        |
| RAFWUS         | 168.846       | O8        | VIMZAT         | 168.621       | N6        | JETVUC         | 168.373       | O4        |
| FEXNAZ         | 168.846       | S1        | ZUGVEC         | 168.619       | O4        | DUGYOU         | 168.368       | N4        |
| TAXNOW         | 168.839       | CI1       | PEMBOY         | 168.611       | CI1       | FOVGAZ         | 168.366       | O5        |
| XUGDEK         | 168.834       | N6        | NARKEA         | 168.61        | N8        | HICLOV         | 168.362       | O11       |
| SARXAO         | 168.826       | O4        | PAPCER         | 168.6         | CI3       | IWORET         | 168.36        | O5        |
| RUCMAE01       | 168.825       | N1        | AREGOT         | 168.595       | O1        | QORLAK         | 168.359       | O12       |
| XAGNEZ         | 168.824       | O18       | DIPCIR         | 168.592       | O20       | MAPLIA         | 168.347       | O15       |
| OGIMOG         | 168.816       | N2        | ICUFUI         | 168.592       | O4        | RUNVAY         | 168.344       | O2        |
| WUJRUP         | 168.812       | O5        | CODVAV         | 168.587       | N4        | SACYOO         | 168.328       | CI2       |
| LEVDUL         | 168.808       | O4        | TAZJAH         | 168.585       | O16       | WARCAV         | 168.319       | N4        |
| OJUHOQ01       | 168.806       | O1        | ZACKAP         | 168.572       | O5        | AGUPUO         | 168.319       | O7G       |
| ZAXFAI         | 168.802       | CI2       | ZUDRUN         | 168.57        | O31       | FASWED01       | 168.319       | O12       |
| PANCUD         | 168.802       | S1        | VUMVIL         | 168.564       | N3        | UQENAG         | 168.317       | N5        |
| XIJKAC         | 168.795       | O6        | DEFHUT         | 168.563       | N8        | POGJAW         | 168.314       | O1        |
| NOBHIX         | 168.792       | O11       | VOWXUC         | 168.563       | O5        | DUCLUL         | 168.312       | O3        |
| HIYNIN         | 168.785       | N2        | TILSUG         | 168.548       | F3        | QELNOO         | 168.311       | As2       |
| CAGSAH         | 168.783       | CI1       | FAYDAN         | 168.544       | O7        | YEYVEH         | 168.305       | O11       |
| PAKVOM         | 168.77        | O6        | POMFIJ         | 168.531       | N3A       | RALRED         | 168.302       | N9        |
| FOXHAE         | 168.769       | N6        | LUMLOW         | 168.531       | O3        | UGOQUE         | 168.302       | O6A       |
| NUPRUL         | 168.767       | O16       | YIBCAR         | 168.529       | O9        | UTAPIQ         | 168.299       | O3        |
| IBUWIN         | 168.756       | N1        | URIRIX         | 168.526       | O4        | GURLUB         | 168.296       | O4        |
| FEQVEE         | 168.737       | O4F       | QAYGAY         | 168.522       | O3        | YEQSOF         | 168.293       | N6        |
| HEFRES         | 168.73        | O4A       | KOHBEP         | 168.517       | O8        | OJUHOQ         | 168.289       | O1        |
| XECTEG         | 168.72        | N1        | ZOCFAB         | 168.517       | O2A       | SEZMIW         | 168.287       | O5        |
| CEPJUE         | 168.72        | O3        | ZAZPEV         | 168.503       | O2        | ITIZES         | 168.285       | O9        |
| NABNAI01       | 168.717       | N3        | XIQFIO         | 168.499       | O2A       | SOBNIJ         | 168.285       | S2        |
| ZELPAL         | 168.709       | S1        | XECTEG         | 168.486       | N4        | SEBBAF         | 168.281       | O15       |
| JUZBUE         | 168.699       | N5        | OPAZN          | 168.476       | O1        | KENJUK         | 168.276       | O1        |
| KUDWAK         | 168.69        | N3        | ICUDOA         | 168.468       | O4        | KEKXAB         | 168.261       | O5        |
| QAYLEK         | 168.689       | N3        | DASQAQ         | 168.464       | O11       | XEPDEE         | 168.258       | N1        |
| ISEMEZ         | 168.688       | O12       | IHITUR         | 168.462       | O4        | RIZREY         | 168.254       | CI2       |
| ZASVAT         | 168.68        | N4        | CUBWIG         | 168.451       | O9        | QOFKIF         | 168.242       | CI3       |
| MULQOA         | 168.679       | O1        | XOLQIY         | 168.449       | O4        | FAHMOS         | 168.24        | O6        |
| AHINIP         | 168.677       | O12       | EQOVEL         | 168.448       | CI1       | XUPROR         | 168.239       | S3        |

|                |               |           |                |               |           |                |               |           |
|----------------|---------------|-----------|----------------|---------------|-----------|----------------|---------------|-----------|
| EMEZOM         | 168.675       | O13       | HONJOM         | 168.445       | O8        | EYEKAX         | 168.232       | O2        |
| WURBEQ         | 168.212       | O7        | MIYYEA         | 167.978       | O6        | DEKGAD         | 167.743       | O7        |
| <b>Refcode</b> | <b>∠YZnLB</b> | <b>LB</b> | <b>Refcode</b> | <b>∠YZnLB</b> | <b>LB</b> | <b>Refcode</b> | <b>∠YZnLB</b> | <b>LB</b> |
| CAYWIK         | 168.208       | CI1       | XOVVOU         | 167.978       | O4        | HOQZUJ01       | 167.742       | N1        |
| OHUQAJ         | 168.189       | O22       | MUHHUT         | 167.975       | F10       | XUXPAI         | 167.738       | O7        |
| HOCRUN         | 168.188       | N7B       | DUVHEJ         | 167.974       | CI1       | ZIPTAW         | 167.737       | CI1       |
| UDOMIK         | 168.188       | CI1       | DAJKIL         | 167.973       | N6        | LOZDOV         | 167.736       | O7        |
| JIXXUK         | 168.178       | O4        | ZZZDVY03       | 167.97        | O2        | GAKQER         | 167.731       | S2        |
| QIXWUR         | 168.177       | O8        | UJOZEY         | 167.966       | N1        | XUZHUK         | 167.729       | N1A       |
| QOFKIF         | 168.175       | CI1       | JAMHEL         | 167.954       | N3        | JALBIL         | 167.727       | I2        |
| RUZTEL         | 168.155       | O4        | USITIA         | 167.946       | O2A       | YOXMIK         | 167.716       | N7        |
| WAZDUY         | 168.149       | O1        | OFUTEQ         | 167.944       | CI1       | NAGZEB         | 167.713       | O7        |
| NOPCUQ         | 168.147       | O2        | MAPLIA         | 167.929       | O8        | CACBIU         | 167.711       | N3        |
| TAQTOV         | 168.141       | O3        | CUZJEM         | 167.928       | O7        | UJEYEP         | 167.709       | N7        |
| UJIRUB         | 168.14        | CI2       | NABMAF         | 167.924       | CI2       | EVORIS         | 167.706       | N2        |
| CEFMOS         | 168.133       | N7B       | GUGYIT         | 167.92        | O22       | DUVHIN         | 167.703       | CI2       |
| FUJBET         | 168.131       | N3        | HOQZUJ         | 167.909       | N2        | WALBOC01       | 167.702       | N2E       |
| YINWOJ         | 168.106       | N3A       | VINMIO         | 167.907       | S1        | HOCROH         | 167.7         | N3A       |
| NEYBID         | 168.106       | O2        | WUWROY         | 167.906       | O11G      | XAXBOP         | 167.698       | O4A       |
| HOTYUM         | 168.103       | O12       | LEVZUL         | 167.903       | N2        | OQEZER         | 167.689       | O11       |
| UQEOVE         | 168.099       | O7        | COSBIW         | 167.889       | O2G       | KUPHEL         | 167.688       | O6        |
| VIVNOF         | 168.098       | O3        | LIHYEI         | 167.885       | O6        | ZNTATE10       | 167.683       | N6        |
| EHAMEH         | 168.092       | CI3       | KOQBUQ         | 167.882       | O6A       | OQIMUY         | 167.681       | N2        |
| FAZCUH         | 168.09        | N3        | RECKOD         | 167.873       | N5        | ARIMUK         | 167.679       | O19       |
| IYUFOA         | 168.089       | F6        | WALBOC         | 167.872       | N5E       | EHAMEH         | 167.67        | O7        |
| JIKZAI         | 168.083       | N3A       | LIYDUS         | 167.871       | O3        | HOQCOH         | 167.666       | CI4       |
| AVOMOO         | 168.083       | O6        | IJIPIC         | 167.858       | N4        | RORSEY         | 167.663       | S2        |
| CEZWIO         | 168.079       | O11       | ZEHMAE         | 167.855       | O2        | QIBYUZ         | 167.662       | O3        |
| QAYNAF         | 168.079       | O8        | MEMXAD         | 167.852       | O1        | GIXPIQ         | 167.661       | N24       |
| PEDJIU         | 168.076       | N1        | UKEHOJ         | 167.845       | O18       | OHUTOC         | 167.661       | O1        |
| FAHMOS         | 168.076       | O8        | MARSUX         | 167.843       | N4A       | QOFKIF         | 167.647       | O7        |
| FAVHIU         | 168.073       | O11       | YIDWEO         | 167.843       | CI2       | QOCVIN         | 167.647       | F1        |
| FEQVEE         | 168.07        | O4F       | DANNOY         | 167.837       | O8        | NAHGOU         | 167.643       | O7        |
| UZAFOR         | 168.065       | O12       | UWUVEO         | 167.837       | F11       | LOQLAF         | 167.641       | O7        |
| XIDSOW         | 168.061       | N3        | MOJKAY         | 167.833       | O16       | DELWUQ         | 167.637       | S1        |
| QUSVEF         | 168.051       | O6        | MUZNUS         | 167.827       | O4        | JAVCEP         | 167.633       | O5        |
| ZEQQEU         | 168.05        | N1B       | QASPAE         | 167.825       | N7        | TULLUJ         | 167.63        | F6        |
| HOXTUL         | 168.049       | O8        | KUCVEL         | 167.821       | N1        | HIKNEX         | 167.623       | N6        |
| LEWQEN         | 168.046       | CI14      | URISOG         | 167.805       | O5        | NABMAF         | 167.623       | O7        |
| SEHLAU         | 168.026       | CI2       | SUZGEZ         | 167.8         | CI1       | BABBOW         | 167.622       | N7        |
| QOFKIF         | 168.025       | CI4       | TEJFIA         | 167.789       | CI2       | RISRER         | 167.616       | O2        |
| OFURAK         | 168.024       | O7A       | XAPXOB         | 167.783       | CI1       | EYURUN         | 167.607       | CI1       |
| NIJWAE         | 168.019       | S2        | DAJKIL         | 167.779       | N2        | FIFGOR         | 167.605       | N5        |
| FEDYEU         | 168.014       | CI1       | DUDLOF         | 167.777       | CI7       | RUWWMON        | 167.591       | S4        |
| COCPUI         | 168.013       | O16       | ZAXKOA         | 167.774       | N3        | GECVUI         | 167.588       | N1        |
| DEKXUP         | 167.998       | O13       | NAGZIF         | 167.77        | O8        | TAZJAH         | 167.582       | O10       |
| UMIQOW         | 167.987       | CI2       | DIWSAG         | 167.766       | N4        | DELTIV01       | 167.581       | O1        |
| GOCNET         | 167.986       | O11       | QAKKUJ         | 167.766       | CI2       | LAVWIO         | 167.58        | O11       |
| VICXEK         | 167.984       | O11       | AWUCUQ         | 167.76        | O2        | DEHPOX         | 167.573       | O5        |
| QUQDEN         | 167.983       | N4        | ZZZDVY02       | 167.752       | O2        | RUCMAE         | 167.568       | CI2       |
| JIPWAK         | 167.979       | N2C       | GUPWUK         | 167.747       | S2        | MIKBOY         | 167.566       | O1        |
| KEMKIX         | 167.559       | O20       | OVESAL         | 167.352       | F4        | JEMXUX         | 167.097       | O6        |
| UNADAP         | 167.551       | N1        | YOSDER         | 167.346       | N2        | RUVHOF         | 167.086       | CI2       |
| YECTEH         | 167.55        | F1        | MIPYIU         | 167.343       | CI1       | DOYBOJ         | 167.081       | O4        |
| GUGYUF         | 167.547       | O22       | LUBPEG         | 167.339       | O2        | KEVQEK         | 167.078       | N8        |
| ICAFIC         | 167.54        | N2        | ZARXUN         | 167.328       | CI4       | MINBAM         | 167.076       | N4        |
| ZEQLEO         | 167.526       | O1        | WUPTAE         | 167.324       | O5        | NIDMIX         | 167.075       | CI1D      |
| XEQNIR         | 167.524       | N1        | RUZTOV         | 167.318       | O2        | KAMLER         | 167.075       | O24       |
| IQUDAA         | 167.523       | O1        | CIBYAO         | 167.315       | O1E       | HODZIJ01       | 167.075       | S1        |
| HARHUG         | 167.516       | N2        | WITCOR         | 167.315       | S2        | ZASQAP         | 167.074       | O7        |

|                |               |           |                |               |           |                |               |           |
|----------------|---------------|-----------|----------------|---------------|-----------|----------------|---------------|-----------|
| COCQIX         | 167.513       | O15       | KEMKIX         | 167.302       | O23       | MATYOX         | 167.065       | N6        |
| VIVDUB         | 167.51        | O3        | LIWXEV         | 167.298       | O1D       | IPIJEY         | 167.063       | O6        |
| <b>Refcode</b> | <b>∠YZnLB</b> | <b>LB</b> | <b>Refcode</b> | <b>∠YZnLB</b> | <b>LB</b> | <b>Refcode</b> | <b>∠YZnLB</b> | <b>LB</b> |
| YUVWOB         | 167.51        | O2        | GURPUG         | 167.294       | O6        | QIDQUT         | 167.062       | O10       |
| CEZRIM         | 167.498       | N4        | MIKCEP         | 167.29        | O3        | TAZJAH         | 167.05        | N64       |
| CESKUK         | 167.497       | O13       | VEFQUU         | 167.285       | I2        | JOMGOK         | 167.04        | N23       |
| MOTTUM         | 167.496       | N3        | OKUXUQ         | 167.264       | O12       | FIDFUU         | 167.039       | O11       |
| LUMLOW         | 167.476       | O6        | VIRLAK         | 167.264       | O6        | HIKKOC         | 167.039       | O5        |
| CEZVIO         | 167.473       | O9        | POCXOW         | 167.259       | O4        | WUPTEI         | 167.03        | O5        |
| GIZFUT         | 167.473       | O18       | OYOWIL         | 167.249       | N13       | DAWQIE         | 167.023       | O5        |
| CAMYEW         | 167.471       | N3        | TEHDOA         | 167.243       | CI1       | JIPGOF         | 167.022       | CI15      |
| COVQIQ         | 167.471       | CI1       | LIKQED         | 167.237       | N4        | EYERAB         | 167.019       | O6        |
| UGIPAC         | 167.461       | N12       | QEXMEO         | 167.236       | O3        | FIZWAO         | 167.017       | O6        |
| IBUWIN         | 167.458       | O3        | RUWMUT         | 167.228       | O21       | IPOWUF         | 167           | O7        |
| NERTEL         | 167.457       | N3        | FALZOL         | 167.208       | N2        | FIFGOR         | 166.995       | N1        |
| PUHMIR         | 167.451       | P2        | RUWMED         | 167.202       | O21       | LONRAK         | 166.992       | O7        |
| RATXEQ         | 167.449       | N2        | VEZYOR         | 167.202       | O5        | NAWTEO         | 166.979       | O16       |
| MARDAN         | 167.449       | O35       | HAGQOV         | 167.196       | O8A       | KITZOD         | 166.971       | O3        |
| ZIQFUD         | 167.446       | O6        | MOJKAY         | 167.196       | O36       | MIKCEP         | 166.967       | O2        |
| JAXTAH         | 167.44        | CI1A      | NIQLAC         | 167.196       | O24       | CEXSOO         | 166.964       | N2        |
| TUFHAE         | 167.436       | O10       | SEZMIW         | 167.193       | O1G       | MAFKUA         | 166.961       | O5        |
| SIYGEO         | 167.433       | N5        | ICUGAP         | 167.185       | S1        | YELHAB         | 166.957       | O7        |
| LOSLAG         | 167.423       | N11       | ZINWUO         | 167.18        | O1        | TILVAM         | 166.952       | N7        |
| XEDLUP         | 167.423       | CI9       | ZINWUO10       | 167.18        | O1        | DOHPAT         | 166.943       | O6F       |
| MUWHIX         | 167.421       | O6        | CEZRIM         | 167.175       | N2        | WACRUR         | 166.942       | O18       |
| JEYTEP         | 167.414       | N2        | FAKHOQ         | 167.174       | O12       | FODNAQ         | 166.938       | O12       |
| QUMJOZ         | 167.412       | N6        | LIRNOR         | 167.17        | O6        | NEPPED         | 166.932       | O7        |
| BABBEM         | 167.409       | O1        | VICCOD         | 167.168       | O3        | JEJFOW         | 166.912       | N7        |
| UMIQOW         | 167.406       | N6        | QUSVEF         | 167.167       | O8        | ZINLUG         | 166.905       | CI1       |
| ITUBOP         | 167.402       | O3        | CAYWIK         | 167.163       | CI3       | JEMYAE         | 166.905       | O5        |
| FODGAI         | 167.398       | N2B       | JISMEG         | 167.155       | O10       | KENJEU         | 166.904       | O6        |
| EDUBEM01       | 167.395       | O7        | ZNTATE10       | 167.147       | S2        | OYOWEH         | 166.895       | N13       |
| JIQPAA         | 167.389       | F12       | MOSPAL         | 167.142       | O11       | VEHLUQ         | 166.891       | O56       |
| NEMVAD         | 167.383       | O8        | KUFLON         | 167.136       | O17       | VIRLAK         | 166.888       | O42       |
| HECHAC         | 167.382       | O2        | ZIHWIZ         | 167.124       | F2        | ZIPCUW         | 166.888       | O1        |
| BASZUU         | 167.371       | O51       | PILNED         | 167.117       | F5        | QEVSOC         | 166.885       | O5        |
| WUPTAE         | 167.366       | O5        | XUXQEN         | 167.117       | F6        | NACZEW         | 166.877       | O5        |
| EDUBEM         | 167.365       | O8        | IXUDAH         | 167.116       | N6A       | QAFHEN         | 166.876       | O8A       |
| HEJMUI         | 167.364       | N1        | KEMKIX         | 167.116       | O22       | UKAQOP         | 166.872       | N3        |
| PATDEW         | 167.358       | O16       | NAHGIO         | 167.111       | O7        | WUWRUE         | 166.87        | O11G      |
| NECZUR         | 167.356       | O2        | XALXOX         | 167.098       | O5        | DASQAQ         | 166.868       | O18       |
| EQOVEL         | 166.847       | O4        | YIBNAA         | 166.625       | O6        | OSOCUW         | 166.383       | CI1       |
| MUZROP         | 166.847       | O5        | MUNLIS         | 166.611       | N16       | RUDMUZ         | 166.382       | O12       |
| WAWJEK         | 166.846       | N1A       | ROBCEQ         | 166.61        | O43       | FUMXIX         | 166.378       | O19       |
| JOFTIJ         | 166.843       | N4        | GILVII         | 166.604       | CI1       | SOPNOB         | 166.371       | O6        |
| IPOWUF         | 166.843       | O6        | IGUDUK         | 166.597       | O4        | ADONIQ         | 166.369       | O7        |
| IFIBAA         | 166.843       | S1        | ECUGOA         | 166.588       | CI3       | CEVYIM01       | 166.36        | O6        |
| KARDEO         | 166.832       | S1        | FUGFET         | 166.584       | N3        | MUDFEW         | 166.358       | O1        |
| CAVFEN         | 166.823       | N2        | NEVHOL         | 166.58        | O10       | TEWDEF         | 166.348       | O4        |
| YISKOE         | 166.811       | O1        | EBUBOV01       | 166.58        | F3        | YENSEQ         | 166.34        | O1        |
| ERUZUP         | 166.802       | F16       | MEMPAV         | 166.577       | O10       | KAKSOI         | 166.339       | O18       |
| FOXHAE         | 166.785       | N3        | AXOTEP         | 166.57        | O6        | CAFSAF         | 166.338       | N6        |
| ZAJKOO         | 166.783       | O1        | VONCOR         | 166.563       | O8        | SEBBAF         | 166.334       | O15       |
| IBUHIY         | 166.78        | N8        | VIRLAK         | 166.549       | As14      | CEZWEK         | 166.323       | N1B       |
| ULICOH         | 166.779       | N6        | NUKTOD         | 166.545       | O7        | VUYNAF         | 166.319       | N2        |
| IDOXUU         | 166.778       | S4        | RUWMED         | 166.542       | CI9       | YOBHOP         | 166.316       | N3        |
| OMOCOK         | 166.772       | N4        | UCARUN         | 166.54        | S1A       | FEXWEM         | 166.308       | N4        |
| GLYZNS10       | 166.771       | O7        | TUGCIJ         | 166.534       | O2        | FEXWEM01       | 166.308       | N4        |
| XOQZEJ         | 166.769       | O3        | DAJKIL         | 166.531       | N12       | MOMQUC         | 166.306       | O4        |
| TEHROO         | 166.768       | O28       | LEZNEL         | 166.517       | O2        | NOWSID         | 166.305       | CI2       |

|                |               |           |                |               |           |                |               |           |
|----------------|---------------|-----------|----------------|---------------|-----------|----------------|---------------|-----------|
| ZEQLAK         | 166.757       | CI1       | KUBQOP         | 166.509       | O7        | CEPBOR         | 166.305       | O6        |
| DOSTUB         | 166.74        | O6        | EFASUA         | 166.506       | CI1       | UDOMIK         | 166.288       | N22       |
| <b>Refcode</b> | <b>∠YZnLB</b> | <b>LB</b> | <b>Refcode</b> | <b>∠YZnLB</b> | <b>LB</b> | <b>Refcode</b> | <b>∠YZnLB</b> | <b>LB</b> |
| NEPPAZ         | 166.735       | O13       | BIZNUW         | 166.505       | N3A       | ARINAR         | 166.285       | O20       |
| CECGID         | 166.731       | O8        | YEXWEH         | 166.501       | N4        | HAQJOB         | 166.282       | O13       |
| AHOFUZ         | 166.73        | N4        | QOFKIF         | 166.501       | CI2       | POCVAG         | 166.277       | N6        |
| RUQSOL         | 166.728       | O1        | BAYYEI         | 166.5         | N6        | WIWBUA         | 166.274       | O6        |
| UCARUN         | 166.728       | S2        | GETPEE         | 166.489       | O4        | XAHKAW         | 166.268       | N5F       |
| RETFEC         | 166.723       | N6A       | EDUBEM01       | 166.477       | O6        | GUHHIC         | 166.268       | O5        |
| UXOXAI         | 166.721       | N7        | CEVYIM         | 166.474       | O6        | IKELUG         | 166.263       | O9        |
| FUJNEF         | 166.717       | O13       | XUGBOR         | 166.472       | O1        | EDUBEM         | 166.249       | O6        |
| UTAZIB         | 166.715       | CI2       | SUWBOC         | 166.454       | CI3       | SOBNIJ         | 166.247       | O8        |
| JUKHII         | 166.711       | F7        | GIXPIQ         | 166.45        | N27       | QEXVOH         | 166.244       | O1        |
| CUBFAH         | 166.695       | O5        | GOCMUI         | 166.45        | O6C       | GANHEJ         | 166.229       | CI2       |
| NIDMOD         | 166.694       | O7        | KIMWUA         | 166.45        | O2        | FASWED         | 166.226       | O23       |
| NIQLIK         | 166.692       | N16       | VONCOR         | 166.445       | O10       | MUGYUJ         | 166.224       | F4        |
| RAHGUG         | 166.69        | O21       | XEJKIJ         | 166.445       | O3        | MULBAX         | 166.215       | O3        |
| LELSII         | 166.686       | O4        | TUFHAE         | 166.443       | O11       | YEQRES         | 166.214       | O7        |
| HUTYAZ         | 166.677       | S3        | UJISAI         | 166.443       | O2        | NEPPAZ         | 166.213       | O16       |
| ULEXER         | 166.673       | O17       | QELKUQ         | 166.433       | N4        | IXUCOU         | 166.202       | CI2       |
| LOJFAT         | 166.662       | O4A       | ADIZAP         | 166.433       | O3        | SIBMIC         | 166.199       | N3A       |
| WEXFIQ         | 166.659       | O2        | GUPWUK         | 166.43        | S2        | DEHPOX         | 166.196       | CI1       |
| RAHGUG         | 166.657       | O29       | YOSSIL         | 166.429       | CI3       | RUGPIU         | 166.194       | N2A       |
| FOXMIQ         | 166.654       | N10       | RERKUW         | 166.429       | O17       | MIBJEO         | 166.188       | N4        |
| DIPCEN         | 166.651       | O19       | PAPGIY         | 166.428       | N2B       | FUMXET         | 166.187       | O19       |
| CEWBUC         | 166.646       | O2        | AQEYOK         | 166.425       | O5        | XEKGEB         | 166.183       | N5        |
| IZUROM         | 166.638       | O14       | YEQRES         | 166.422       | O14       | BEJMEI01       | 166.174       | CI2       |
| FAKXAT         | 166.635       | O7        | MEBDAC         | 166.415       | N7        | ZOJNIX         | 166.173       | Te2B      |
| ERIKOG         | 166.632       | O8        | KUFLIH         | 166.406       | O17       | DUFKAT         | 166.168       | O3        |
| KAPBEJ         | 166.627       | N9        | JAQZOT         | 166.389       | O3        | JIQPAA         | 166.161       | F4        |
| TAZJAH         | 166.626       | O2        | ISODUP         | 166.388       | O7        | YOSSOR         | 166.16        | N4        |
| FUMXOD         | 166.159       | O19       | XIDBOF         | 165.894       | O8        | GEVFAR         | 165.59        | O1        |
| NEKXOU         | 166.148       | O8        | LUPPEU         | 165.891       | O9A       | IJUXUG01       | 165.587       | O7        |
| RECXUU         | 166.139       | CI3       | XAFSEF         | 165.888       | O1A       | BONNOI         | 165.585       | O6        |
| RIZREY         | 166.136       | O7        | PABJAE         | 165.882       | CI2       | WIGLAA         | 165.582       | O6        |
| DAJCIE         | 166.133       | O16       | YARNIS         | 165.878       | N3        | LULXEX         | 165.579       | N2        |
| ZEBKAS         | 166.11        | N6        | HUCHOD         | 165.874       | O3        | QORJIQ         | 165.577       | O8        |
| HUTYAZ         | 166.11        | O2        | DUSVUK         | 165.873       | O3        | WUXVOB         | 165.564       | O10       |
| MIKHEV         | 166.094       | O6        | MODHOD         | 165.872       | O3        | DOKKEU         | 165.56        | CI3       |
| ACBMZN         | 166.092       | N2C       | KIMWUA         | 165.867       | N4        | QAKKUJ         | 165.555       | O7        |
| BEJMEI         | 166.089       | CI1       | WEMNIN         | 165.867       | O4A       | IJUXUG         | 165.551       | O9E       |
| PEJWUX         | 166.068       | O12       | EBUBOV         | 165.846       | F3        | TUMGAM         | 165.55        | N5        |
| DUXLAK         | 166.066       | N5        | XUXQAJ         | 165.839       | O6        | ZUJLEX         | 165.548       | O5        |
| NAHGUA         | 166.064       | O7        | RUWMUT         | 165.836       | O17       | CEZWIO         | 165.547       | N2        |
| UJEYIT         | 166.056       | O9        | TESNUC         | 165.836       | O6        | YULXOT         | 165.545       | S1        |
| AGOKAK         | 166.053       | O1        | RICNAU         | 165.835       | O6        | MUGBOI         | 165.54        | N1        |
| FEJZON         | 166.044       | O4        | MOKTOW         | 165.819       | N2A       | OGUBAV         | 165.54        | O3A       |
| MEHGUD         | 166.042       | CI1       | OKUXUQ         | 165.813       | O13       | RALZUD         | 165.538       | O33       |
| CUHKUN         | 166.038       | CI2       | MARDAN         | 165.808       | O18       | KAGRET         | 165.537       | N3        |
| QOCVIN         | 166.038       | F3        | YEHDAT         | 165.808       | O7B       | LINVOW         | 165.537       | F3        |
| NIQLAC         | 166.034       | O24       | FAKTIY         | 165.805       | O7        | GARWIH         | 165.535       | O9        |
| HOQQEK         | 166.031       | O8        | NEPPUT         | 165.801       | O3        | FIHYOM         | 165.525       | N3        |
| KICVAU         | 166.019       | O11       | FITNIH         | 165.794       | O6C       | MEWWET         | 165.522       | O5        |
| OYOWIL         | 166.008       | N24       | XOHNEO         | 165.791       | O8        | MUZHAR         | 165.508       | O5        |
| NUGMUA         | 166.002       | N7        | BEZZOZ         | 165.785       | CI2       | AFUJAM         | 165.506       | O18       |
| WALCET         | 165.998       | O6        | VEDTOP         | 165.763       | F1        | HEJNAP         | 165.497       | N1        |
| ISUMAK         | 165.991       | N9        | JULDEZ01       | 165.755       | O2        | ZAXREX         | 165.496       | O8        |
| GIKRIF         | 165.99        | O12       | XERKIR         | 165.753       | O6        | JAJPIU         | 165.494       | O9        |
| GAMFUW01       | 165.983       | O1        | WEJYAP         | 165.738       | N1C       | DISWOU         | 165.492       | N4        |
| QADTIB         | 165.978       | N8        | ZUDHAH         | 165.72        | O12       | DEHFIH         | 165.491       | O9        |

|                |               |           |                |               |           |                |               |           |
|----------------|---------------|-----------|----------------|---------------|-----------|----------------|---------------|-----------|
| NABMAF         | 165.969       | I1        | CUBYIJ         | 165.711       | O16       | PURVAB         | 165.479       | O3        |
| ZZZDVY04       | 165.969       | O2        | JEXQEJ         | 165.706       | O5        | XOFFEG         | 165.475       | CI1       |
| <b>Refcode</b> | <b>∠YZnLB</b> | <b>LB</b> | <b>Refcode</b> | <b>∠YZnLB</b> | <b>LB</b> | <b>Refcode</b> | <b>∠YZnLB</b> | <b>LB</b> |
| NUDNIL         | 165.955       | N22       | JAHNOY         | 165.701       | N5        | UDUGOQ         | 165.474       | P2        |
| DAYZIO         | 165.954       | O10       | NAKPUM         | 165.697       | O5        | HABZIX         | 165.455       | N3        |
| RUNVAY         | 165.953       | N3        | FIKNIX         | 165.688       | O12       | NUDNIL         | 165.454       | O15       |
| CAFSEJ         | 165.953       | CI2       | GACJEC         | 165.684       | N3        | IJUGOJ         | 165.452       | O1        |
| GUPWUK         | 165.953       | S1        | INEPIC         | 165.684       | O4        | GUKZUJ         | 165.451       | I2        |
| OYOWIL         | 165.95        | O1        | BEMHEK         | 165.679       | CI1       | ZAXREX         | 165.449       | O12       |
| GAMFUW         | 165.948       | O6        | YINWOJ         | 165.678       | N2A       | DUBMUL         | 165.447       | O6        |
| KARDEM         | 165.948       | O34       | EKOCAJ         | 165.67        | N5        | VEFWOU         | 165.445       | CI6       |
| WEMZUJ         | 165.946       | CI1       | XELLIK         | 165.67        | O1        | MAXGOL         | 165.444       | N1        |
| SOPWIF         | 165.935       | O4        | TIRHEJ         | 165.668       | O6        | PIRFOL         | 165.444       | O14       |
| QORLEO         | 165.928       | O3        | XULZIQ         | 165.665       | O18       | ZIXLOK         | 165.44        | N5        |
| MEBDEG         | 165.924       | N7        | ROBCEQ         | 165.664       | O27       | CARVAW         | 165.436       | O3        |
| GEYRIO         | 165.924       | O10       | HUTYAZ         | 165.664       | S1        | MICWEE         | 165.435       | F2        |
| JULDEZ         | 165.915       | O4        | RUZVAJ         | 165.662       | O18       | DELWUQ         | 165.432       | S3        |
| NIFLEV         | 165.911       | O5        | LAFXUP         | 165.65        | O3        | ZERVIE         | 165.43        | S1        |
| GAVZUC         | 165.901       | CI2       | BEWBAI         | 165.648       | N3        | PIRFOL01       | 165.421       | O14       |
| MIWTAP         | 165.899       | N3A       | RUZVIR         | 165.641       | O11       | UMIQIQ         | 165.415       | N15       |
| XEPCOM         | 165.897       | N4        | UMIQEM         | 165.608       | N7        | GUQLUA         | 165.414       | O45       |
| MICWEE01       | 165.396       | F2        | HICLOV         | 165.122       | O4        | SUWBOC         | 164.904       | CI2       |
| ZAFKEZ         | 165.383       | O9        | WISZUT         | 165.121       | O1        | GOTLIM         | 164.9         | O11       |
| OFUGAY         | 165.369       | O22       | HIBMEM         | 165.115       | O8        | TEJFIA         | 164.898       | O9        |
| KUFLUT         | 165.359       | O17       | XOXZUI         | 165.108       | N1C       | OPUJOZ         | 164.897       | S2        |
| LAPZUB         | 165.355       | N15       | WAVDAY         | 165.106       | O7        | TUXMIL         | 164.89        | O8        |
| QADTOH         | 165.344       | N12       | ROWBEM         | 165.101       | N7        | YEQSOF         | 164.886       | N24       |
| DIPCOX         | 165.338       | O11       | MODHOD         | 165.091       | S2        | CUKMEB         | 164.883       | O2A       |
| CAYWIK         | 165.333       | O13       | JUWBIO         | 165.09        | N2C       | XIZZOZ         | 164.879       | CI2       |
| MARDAN         | 165.333       | O30       | DOBGOR         | 165.088       | N8        | FUJYAN         | 164.875       | N2        |
| VAJHIA         | 165.329       | O3F       | EGIHOR         | 165.086       | S1        | WARCOJ         | 164.873       | N1        |
| SUZGOM         | 165.327       | O4C       | VUNJIY         | 165.08        | N2        | DIFWEU10       | 164.872       | CI1A      |
| RATCEW         | 165.326       | N3        | CAKSEO         | 165.075       | O3        | QAMHUK         | 164.872       | O4        |
| QARSIL01       | 165.319       | O1        | ALUXEM         | 165.074       | O2        | NEGJOZ         | 164.87        | N1        |
| QIDXEH         | 165.317       | O4        | CAFSEJ         | 165.07        | N6        | CAVXOP         | 164.868       | N2C       |
| NAHHAH         | 165.309       | CI2       | NAHJEN         | 165.067       | O7        | WOJJEK         | 164.864       | S2        |
| KERGOE         | 165.308       | O9        | MATNIF         | 165.053       | O7        | NIDDIO         | 164.858       | CI1       |
| VIVNOF         | 165.307       | O4        | MOJKAY         | 165.052       | O10       | FEXQAC         | 164.85        | N7        |
| RISRER         | 165.305       | CI1       | KOQJIL         | 165.051       | O2A       | FODZAA         | 164.85        | O9        |
| MAYNIM         | 165.305       | O1        | YEYFIT         | 165.049       | O3        | YEYVEH         | 164.836       | O16       |
| WEXHIS         | 165.303       | CI1       | FUJBIX         | 165.042       | O7        | HOCCIO         | 164.828       | O16A      |
| DUDLOF         | 165.302       | CI3       | OBUNEI         | 165.034       | O13       | YEJNUA         | 164.816       | N12       |
| ROBCEQ         | 165.291       | O28       | KAPWUV         | 165.029       | O75       | WUCGOQ         | 164.812       | O12       |
| VIBJEW         | 165.272       | O6        | ZAHSUZ         | 165.029       | O3        | GUTDUW         | 164.81        | CI2       |
| IKELUG         | 165.266       | O9        | NABMAF         | 165.023       | I2        | DIPCUD         | 164.81        | O8        |
| ZIHWIZ         | 165.264       | F9        | CIWVAG         | 165.018       | N6        | GUCZAG         | 164.792       | O18       |
| IFIYIG         | 165.254       | S6        | ETUXUM         | 165.012       | O2A       | SARCIA         | 164.791       | O13       |
| WIRHUD         | 165.253       | O4        | NAGZIF         | 165.012       | O8        | OHAHEL         | 164.786       | O5        |
| IPUKIQ         | 165.248       | O3        | FIMWAA         | 165.007       | N1        | TALZEM         | 164.781       | O3        |
| PETFON         | 165.238       | O4        | MIKCEP         | 165.006       | O14       | NACZEZ         | 164.777       | CI2       |
| WISZUT01       | 165.237       | O3        | IXOXAV         | 165           | O2        | NASJOI         | 164.773       | N2        |
| IFAHEC         | 165.235       | O34       | KUFMAA         | 164.997       | O17       | WEZNUM         | 164.768       | O6        |
| UDOMIK         | 165.233       | O9        | XUGDEK         | 164.992       | N24       | QITTOE         | 164.767       | F3        |
| SEHDUG         | 165.23        | O6        | NENJIB01       | 164.988       | O7        | ZUBZAX         | 164.763       | O4        |
| KEKXAB         | 165.228       | O5        | XEJFIC         | 164.988       | O9        | SOCGOJ         | 164.755       | N2        |
| ESISIK         | 165.213       | O5        | NENJIB         | 164.982       | O7        | MOJKAY         | 164.745       | O21       |
| FIFWIB         | 165.208       | N3        | DUVHOT         | 164.975       | O4        | SUWTUC         | 164.735       | O6        |
| YEJNUA         | 165.203       | O1        | MEYSIW         | 164.971       | O9        | JISJUT         | 164.731       | O10A      |
| ASALIP         | 165.195       | O3B       | SARCIA         | 164.967       | O25       | HIBMEM         | 164.728       | O7        |
| TARROW         | 165.188       | O3        | WAMXEQ         | 164.961       | O3        | YACFUE         | 164.726       | N3        |

|                |               |           |                |               |           |                |               |           |
|----------------|---------------|-----------|----------------|---------------|-----------|----------------|---------------|-----------|
| VIYJAQ         | 165.184       | O2B       | SINWIW         | 164.953       | I3        | KARXIL         | 164.726       | O15       |
| UGADIP         | 165.183       | O11       | JOMGOK         | 164.952       | N27       | QOMFEF         | 164.711       | O57       |
| <b>Refcode</b> | <b>∠YZnLB</b> | <b>LB</b> | <b>Refcode</b> | <b>∠YZnLB</b> | <b>LB</b> | <b>Refcode</b> | <b>∠YZnLB</b> | <b>LB</b> |
| NOPNIS         | 165.179       | O1        | KOMRAH         | 164.952       | O19       | UQUVEI         | 164.708       | I1        |
| DEKXUP         | 165.174       | N8        | LECWEX         | 164.941       | O3        | VARRUD         | 164.708       | O13       |
| MIBJAK         | 165.174       | O4        | VENMIL         | 164.938       | O5        | GOWHEI         | 164.705       | Cl1       |
| QJKFIB         | 165.16        | S2        | JOMGOK         | 164.927       | O5        | ZAQVEW         | 164.705       | O11       |
| ZEJXOE         | 165.149       | O4        | ZACKAP         | 164.927       | O11       | QORKIR         | 164.7         | O15       |
| FAZCUH         | 165.13        | N1        | FEXPOP         | 164.926       | O4        | EBAQOO         | 164.694       | N2        |
| MEYSES         | 165.129       | O12       | UNIPUD         | 164.925       | O5        | QAVBIA         | 164.692       | O1B       |
| DIPCAJ         | 165.123       | O11       | MEYSOC         | 164.91        | O6        | DICDIG         | 164.687       | O3        |
| LAYTAJ         | 164.68        | O1A       | MICWII         | 164.477       | F2        | MUHHUT         | 164.243       | F2        |
| VALFIZ         | 164.678       | N3        | XIVMAT         | 164.475       | Cl4       | JONXIV         | 164.234       | N6        |
| NUDNIL         | 164.678       | O13       | NORCIJ         | 164.471       | N3C       | ADECOD         | 164.23        | N25       |
| QIDXIL         | 164.677       | O5        | IBONOD         | 164.471       | O6        | FASXII         | 164.23        | O15       |
| CUVNAK         | 164.674       | O5        | JIVNAH01       | 164.47        | O9B       | COCQET         | 164.228       | O10       |
| UNIQEO         | 164.673       | O1A       | TIRTAQ         | 164.464       | O9        | BOVNIK         | 164.224       | O5        |
| LOSLEK         | 164.67        | O4        | FAWLAS         | 164.46        | O27       | VUWCIA         | 164.223       | O9        |
| FAXZEN         | 164.665       | N11       | OJIPIJ         | 164.459       | N4        | AQUHIG         | 164.216       | O6        |
| MURJIV         | 164.649       | N2        | JULDEZ         | 164.454       | O6        | UDOQAH         | 164.204       | N1        |
| ROBCEQ         | 164.647       | O42       | CEFLAD         | 164.451       | O6        | APEBAZ         | 164.187       | O14       |
| QIBYEJ         | 164.635       | Cl4       | MASYAH         | 164.448       | O7        | UJEJUO         | 164.179       | F2        |
| FUZYEH         | 164.634       | O4        | MICWII01       | 164.442       | F2        | CODQOC         | 164.177       | S4        |
| ZETVEB         | 164.625       | S3        | CAFHEZ         | 164.441       | Cl1       | EBEZEU         | 164.169       | N5        |
| NICJOY         | 164.619       | N2        | QOFKIF         | 164.439       | O14       | XUXPAI         | 164.142       | O11       |
| CABPEE         | 164.617       | O10       | FOWQEQ         | 164.412       | O19       | SOPWIF         | 164.14        | N14       |
| IRULUF         | 164.612       | Cl2       | YELHAB         | 164.394       | O2        | WUPTAE         | 164.136       | O15       |
| YOPBUD         | 164.61        | N4        | ZEHMAE         | 164.393       | N2        | JETXIT         | 164.132       | O3        |
| XIZZO          | 164.598       | O2        | DELWUQ         | 164.393       | S12       | MOJKAY         | 164.124       | Cl9       |
| NABNAI         | 164.597       | N3        | ZAZKIU         | 164.386       | O6        | WUPTAE         | 164.119       | O17       |
| YIDWEO         | 164.596       | Cl4       | SUVPEH         | 164.378       | O21       | XOHNEO         | 164.119       | O7        |
| DICDIG         | 164.595       | N1        | KIBZEB         | 164.371       | O3        | KUBQOP         | 164.107       | O8        |
| IJEDOR         | 164.591       | O8        | IMEFOV         | 164.37        | O4        | KIBZIF         | 164.095       | O15       |
| VAJLID         | 164.588       | O9        | MOKYAO         | 164.37        | O1        | FECHIG         | 164.092       | N9A       |
| NEPMIF         | 164.585       | S1B       | KOZJUH         | 164.367       | O16       | MUJHOP         | 164.092       | N7        |
| QORFEI         | 164.584       | O5        | HIKMOG         | 164.35        | N5        | BIQBUB         | 164.092       | O29       |
| TIQBEB         | 164.58        | O12       | NETLOR         | 164.348       | O7        | QAWLOT         | 164.089       | O5        |
| UQENAG         | 164.579       | N2        | WUCGOQ         | 164.343       | O10       | LASMEZ         | 164.086       | O25       |
| LICHOU         | 164.573       | N11       | QOTBAE         | 164.338       | N3C       | MOJKAY         | 164.086       | O67       |
| URIQES         | 164.568       | Cl1       | BINKUI         | 164.314       | O16       | FIFXAU         | 164.085       | N3        |
| ETUXAT         | 164.558       | O4        | GUGZAM         | 164.31        | O22       | PUPVEC         | 164.083       | Cl1       |
| RADMEQ         | 164.535       | N2A       | XIDDUL         | 164.309       | O9        | YACYUX         | 164.079       | O8        |
| LUMLOW         | 164.534       | O10       | ESISIK         | 164.303       | Cl2       | UVIKES         | 164.078       | O2        |
| ZIWROP         | 164.532       | O27       | GUQLUA         | 164.302       | O68       | PEVJIK         | 164.074       | O8        |
| KIYBED         | 164.531       | N2        | HEJNAP         | 164.3         | N6        | ETUXUM         | 164.073       | Se1A      |
| MOJKAY         | 164.531       | O65       | JONNUY         | 164.3         | Cl5       | HUQWEW         | 164.068       | O7        |
| JIWPAJ         | 164.53        | O21       | DAXXAE         | 164.298       | O1        | BIPGIT         | 164.067       | O11       |
| DILBIK         | 164.528       | O4        | YORVUX         | 164.297       | N14       | OKUXUQ         | 164.062       | O7        |
| NAHGUA         | 164.526       | Cl2       | AQUHIG         | 164.293       | O9        | SOGNAG         | 164.06        | O7        |
| DASPUJ         | 164.525       | O7        | XAVKEN         | 164.286       | O14       | OCIFUE         | 164.059       | N5        |
| AZOHEC         | 164.523       | O10       | CAYWEG         | 164.284       | Cl1       | XEJKAB         | 164.05        | O3D       |
| TEXDAF         | 164.507       | N4        | RAJDOX         | 164.282       | O2        | EPEYII         | 164.047       | O14       |
| YUZQIV         | 164.499       | O3A       | AZUCIH         | 164.272       | O1B       | RIWZUW         | 164.042       | O10       |
| JIVNAH         | 164.498       | O9B       | ARIGEQ         | 164.271       | O3        | DEZYAL         | 164.037       | O23       |
| XIKWEU         | 164.491       | O1        | WOGSES         | 164.271       | F1        | QUQFUD01       | 164.034       | S1        |
| VAJLUP         | 164.487       | Cl1       | SOFFEA         | 164.265       | Cl1       | ASUXIX         | 164.03        | O13       |
| RAVKIL         | 164.483       | O1        | CEZWAG         | 164.254       | N1        | ASALIP         | 164.028       | O5        |
| RUZVIR         | 164.483       | O13       | MIWJOU         | 164.251       | O3        | KUFMEE         | 164.027       | O17       |
| YISKOE         | 164.48        | O3        | WIBTUW         | 164.251       | O2        | EFUJIA         | 164.025       | N13       |
| LAKPIY         | 164.478       | O3        | MOFWUA         | 164.246       | O5        | MATVAG         | 164.024       | O8        |

|                |               |           |                |               |           |                |               |           |
|----------------|---------------|-----------|----------------|---------------|-----------|----------------|---------------|-----------|
| OBUGIB         | 164.022       | N3A       | VICXEK         | 163.795       | O9        | QUTCUF         | 163.592       | Cl1       |
| WARFAX         | 164.017       | Cl1       | PIKYEQ         | 163.784       | O5B       | SUWBOC         | 163.59        | O13       |
| <b>Refcode</b> | <b>∠YZnLB</b> | <b>LB</b> | <b>Refcode</b> | <b>∠YZnLB</b> | <b>LB</b> | <b>Refcode</b> | <b>∠YZnLB</b> | <b>LB</b> |
| ZUBZAX         | 164.016       | Cl4       | XASDAX         | 163.783       | O5        | QORJIQ         | 163.588       | O5        |
| QOMFEF         | 164.009       | O60       | QIDREE         | 163.778       | O1        | MAPHAO         | 163.579       | N3        |
| NABNAI         | 164.001       | N2        | FAHMUY         | 163.775       | N6A       | MOJKAY         | 163.578       | O54       |
| GEVFAR         | 164           | O10E      | MARDAN         | 163.761       | O11       | YEJNIO         | 163.577       | O6        |
| QUQFUD         | 163.999       | S5B       | ERUZUP         | 163.761       | F3        | ROVFEP         | 163.572       | N28       |
| RESSUH         | 163.996       | O14       | IHIVAX         | 163.759       | N6        | FUZYEH         | 163.567       | O1        |
| GAFMIK         | 163.985       | N5        | SICDIT         | 163.757       | N3        | LERNAZ         | 163.566       | Cl2       |
| HOPTIS         | 163.983       | N6        | LIDWAA         | 163.752       | O21       | LIDWAA         | 163.559       | O12       |
| SIRFUJ         | 163.976       | N3A       | DINDIP         | 163.747       | O11       | GEGYAW         | 163.557       | F4        |
| JISKOO         | 163.969       | N3        | TUYGAX01       | 163.745       | O2        | JESQAA01       | 163.555       | O4        |
| FERFIU         | 163.968       | O10       | YEQRES         | 163.739       | Cl2       | FOCNET         | 163.551       | O5        |
| PICBAE         | 163.967       | O10       | RUZVIR         | 163.735       | O16       | ZUDHAH         | 163.548       | O7        |
| QAKKOD         | 163.966       | O5        | SEKMIH01       | 163.732       | O7        | GUQTOB         | 163.547       | O3        |
| VIRXAX         | 163.964       | O8        | WARDUP         | 163.732       | O8        | IDESAP         | 163.547       | O1        |
| COCQAP         | 163.962       | O10       | GOPDOH         | 163.731       | Cl1       | JESQAA         | 163.547       | O4        |
| QORLEO         | 163.951       | N4        | XUHM0E         | 163.729       | O7        | WIRCUX         | 163.545       | O2        |
| KELTUR         | 163.943       | O4A       | CAYWEG         | 163.724       | Cl3       | MATNIF         | 163.535       | O11       |
| ZIHWIZ         | 163.94        | F28       | USITOG         | 163.711       | O6        | AFIRUD         | 163.534       | O1D       |
| FELPES         | 163.934       | Cl1       | NEPPON         | 163.701       | O7        | ALUXEM         | 163.53        | O8        |
| HIXJUW         | 163.932       | O5        | AVOMII         | 163.7         | O5        | MOJKAY         | 163.527       | O48       |
| KATVOR         | 163.928       | O11       | EXIVUC         | 163.694       | O8        | XOQZEJ         | 163.525       | O4        |
| OMOCOK         | 163.927       | N1        | KIYBED         | 163.686       | N5        | HAPCIO         | 163.522       | N3B       |
| NEPPON         | 163.926       | O1        | UGIPAC         | 163.683       | N16       | IKELUG         | 163.519       | O8        |
| BASZUU         | 163.92        | O50       | TILTAN         | 163.678       | I2        | ANOREB         | 163.515       | N2        |
| HEXGUO         | 163.915       | O8        | IQERAA         | 163.675       | O1A       | PEBNIV         | 163.5         | N1D       |
| CUBWIG         | 163.913       | O11       | CEYSEF         | 163.675       | S2        | ZAPXUN         | 163.5         | F12       |
| JADFAZ         | 163.91        | N8        | YOXMIK         | 163.674       | N3        | VOWXIO         | 163.496       | O2        |
| SUSXUA         | 163.896       | O10       | KUFMII         | 163.674       | O17       | GARWIH         | 163.492       | O10       |
| VIRLAK         | 163.891       | O2        | ROVFEP         | 163.673       | N8        | EFOXAB         | 163.487       | N2        |
| ENUBIA         | 163.868       | O8        | HEHKOU         | 163.672       | O1        | ALELAG         | 163.487       | O8        |
| TUYGAX02       | 163.849       | O2        | HEHKOU10       | 163.672       | O1        | VAVBUQ         | 163.483       | O8        |
| MARDAN         | 163.839       | O22       | NIQLAC         | 163.67        | F3        | BAYYEI         | 163.48        | N4        |
| JULDEZ01       | 163.829       | O7        | HUDNAW         | 163.667       | N4        | TAXLIO         | 163.479       | S1        |
| ITIZES         | 163.828       | O13       | KEYLEG         | 163.666       | O11       | TUMREA         | 163.473       | O7        |
| BORKEZ         | 163.826       | N6        | NIDDEK         | 163.664       | O5        | DEKGAD         | 163.47        | O8        |
| ERIKOG         | 163.824       | O6        | COCPUI         | 163.655       | O18       | NAFHAE         | 163.468       | O3        |
| JAHNUE         | 163.823       | N10       | PUXTIN         | 163.639       | N4B       | KILYAJ         | 163.467       | O5        |
| TUYGAX         | 163.821       | O1        | NAWTEO         | 163.63        | O25       | YAKPAD01       | 163.462       | O6        |
| MUZVUY         | 163.82        | O1        | WIGLAA         | 163.629       | O5        | ROVFEP         | 163.456       | N32       |
| RUWMED         | 163.815       | Cl5       | FOZGOT         | 163.626       | O2        | DEBGEY         | 163.447       | N6        |
| AWOPUY         | 163.809       | O1        | ROVFEP         | 163.622       | N18       | XEJKIJ         | 163.447       | N1        |
| ITALIZ         | 163.803       | S6B       | KEYZAQ         | 163.608       | O46       | FODSOI         | 163.444       | N1A       |
| NUHBOI         | 163.802       | O4        | WASFIF         | 163.608       | O7        | BADPIH         | 163.443       | F2        |
| QAMKOE         | 163.799       | N2        | OHIMUQ01       | 163.602       | O11       | OHUYIB         | 163.441       | O7        |
| BEMHAG         | 163.799       | O4        | EFASUA         | 163.599       | Cl1       | ZAXKOA         | 163.439       | N2        |
| XASDAX         | 163.799       | O1        | KAMLER         | 163.595       | O17A      | EFASUA         | 163.433       | O15       |
| QOXHAO         | 163.797       | O2        | PUXTIN01       | 163.594       | N4B       | VONCOR         | 163.431       | Cl2       |
| ROVFEP         | 163.425       | N24       | UYIBUB02       | 163.263       | O2        | NIXKEM         | 163.045       | O10       |
| WEYMOE         | 163.424       | N1        | QIDRAA         | 163.259       | O1A       | KILXUC         | 163.031       | O20       |
| REJYIS01       | 163.424       | O7        | WEWPIB         | 163.259       | O8        | YAFHAQ         | 163.029       | N2B       |
| RALZUD         | 163.42        | O27       | AMAZEY         | 163.258       | O2        | VEDTOP         | 163.025       | F15       |
| FUGFET         | 163.419       | O7        | OJUJIM         | 163.252       | N4        | RUZSUA         | 163.024       | Cl4       |
| MAHVUP         | 163.414       | N3        | WUPTEI         | 163.25        | O7        | NUCRIN         | 163.023       | O2C       |
| CIHUU          | 163.414       | O15       | ROVFEP         | 163.247       | N12       | WIZMAT         | 163.02        | O8        |
| SUFZEB         | 163.408       | N4        | CAHCOH         | 163.242       | Cl6       | DOBGUX         | 163.018       | N16       |
| YEJNIO         | 163.403       | O7        | GAKDAX         | 163.236       | O15       | TUZJOO         | 163.017       | S2        |
| QEPROW         | 163.396       | O4F       | DEHPEN         | 163.235       | O1        | ANOREB         | 163.01        | O2        |



|                |               |           |                |               |           |                |               |           |
|----------------|---------------|-----------|----------------|---------------|-----------|----------------|---------------|-----------|
| ROVFEP         | 163.395       | N4        | IDUJAT         | 163.234       | O10       | LEHMUK         | 163.001       | O11       |
| PEFHAN         | 163.393       | O2        | NIDDEK         | 163.233       | C11       | MIPYEQ         | 162.994       | N7        |
| <b>Refcode</b> | <b>∠YZnLB</b> | <b>LB</b> | <b>Refcode</b> | <b>∠YZnLB</b> | <b>LB</b> | <b>Refcode</b> | <b>∠YZnLB</b> | <b>LB</b> |
| VIRLAK         | 163.392       | O10       | BABBOW         | 163.228       | O2        | ZUDHAH         | 162.986       | O5        |
| FODSOIO1       | 163.384       | N1A       | UWUVAK         | 163.227       | C11       | KALJEN         | 162.985       | C11       |
| COBRIW         | 163.383       | N1B       | IKEREV02       | 163.224       | O7        | NUCRINO1       | 162.984       | O2D       |
| DEKCEF         | 163.382       | O5        | REGMAV         | 163.212       | O3C       | CAKSEO         | 162.982       | O4        |
| BERGOV         | 163.377       | N1        | HOPJUT         | 163.209       | I4        | COLBUB         | 162.967       | N18       |
| SUFZAX         | 163.374       | N4        | REJYIS         | 163.208       | O7        | ULIBOG         | 162.959       | N1B       |
| IBIDAY         | 163.365       | O4AA      | IPUKIQ         | 163.207       | O4        | TEXDAF         | 162.947       | N3        |
| QEPRUC         | 163.355       | O5F       | XEGGEX         | 163.198       | C16       | TULLUJ         | 162.938       | F11       |
| XECTEG         | 163.354       | O4        | HECLIN         | 163.193       | N1A       | XOMPAR         | 162.933       | N2        |
| JUFCOE         | 163.353       | O4        | KAYBEU         | 163.19        | C14       | RERKUW         | 162.93        | O16       |
| DAPPAM         | 163.348       | C11       | XINTAS         | 163.186       | O19       | TECPAW         | 162.929       | N5        |
| HICLOV         | 163.343       | N2        | PEWDIG         | 163.182       | O9        | SUPLAR         | 162.928       | N4        |
| GUPWUK         | 163.338       | S3        | ISEMEZ         | 163.18        | N16       | LERSOS         | 162.924       | N5        |
| ROVFEP         | 163.336       | N16       | VELQUC         | 163.169       | N2        | EHIZAY         | 162.924       | F15       |
| CEPBOR         | 163.335       | N1        | XULZIQ         | 163.166       | O8        | JITGAV         | 162.921       | O2        |
| YELFIH         | 163.335       | O3        | OYOWIL         | 163.161       | N5        | TAVCIF         | 162.918       | N3        |
| VAMMIG         | 163.332       | F3        | QIDREE         | 163.158       | O4        | TEFKUL         | 162.918       | C12       |
| PUHWEW         | 163.33        | O5        | HAWBEN         | 163.149       | N1        | HAZYUE         | 162.918       | O7C       |
| TEJFIA         | 163.33        | O11       | OXOGUG         | 163.146       | Se4       | KARDEM         | 162.918       | O35       |
| CIWBUH         | 163.326       | O7        | BUZTEV         | 163.142       | N7        | VABCIN         | 162.915       | N23       |
| QASZAO         | 163.325       | F1B       | EZEJOL         | 163.142       | O19       | EYERAB         | 162.913       | O3        |
| LUVBAH         | 163.319       | O4        | MILRUY         | 163.132       | O6        | DUKBUH         | 162.912       | O11       |
| ROJQIS01       | 163.313       | O3        | ROWBEM         | 163.123       | N7        | RUPCIQ         | 162.911       | F67       |
| DEBSUZ         | 163.312       | O23       | ESARAT         | 163.121       | O4E       | VOWXIO         | 162.902       | C11       |
| XIZZO          | 163.312       | O8        | NAGZEB         | 163.113       | O7        | WALCET         | 162.899       | O6        |
| XELXAP         | 163.311       | O5        | ROJQIS         | 163.094       | O3        | UJEYIT         | 162.893       | C12       |
| VOJMEP         | 163.31        | O3        | FAXCUF         | 163.09        | O10       | SESPIQ         | 162.892       | O5        |
| YAKPAD         | 163.305       | O6        | WIGLAA         | 163.084       | O1        | ULAKOI         | 162.889       | N4        |
| KIBZAX         | 163.298       | O5        | COCQIX         | 163.083       | O18       | ELAMOW         | 162.887       | O3        |
| DUQZOH         | 163.296       | O3        | RISRER         | 163.081       | O3        | NEKXAG         | 162.881       | N11       |
| ONATUT         | 163.292       | N2G       | PUNQIZ         | 163.08        | O21       | CISWOR         | 162.874       | O8        |
| WUZNEN         | 163.288       | O2        | QIDRII         | 163.076       | O1        | MEDROF         | 162.871       | O4        |
| YIMWAU         | 163.288       | O5        | IGAWET         | 163.07        | N7        | FIPKUM         | 162.866       | N5        |
| SIYQAT         | 163.284       | S2        | LINWOV         | 163.061       | N5        | BAYVAB         | 162.865       | C14       |
| NEPPUT         | 163.28        | O9        | NAZVOB         | 163.061       | O9A       | QORJIQ         | 162.859       | O7        |
| EQOVEL         | 163.277       | O5        | QAKYAG         | 163.055       | C13       | WARCOJ         | 162.858       | O10       |
| GAKDAX         | 163.264       | O13       | AGOTAS         | 163.048       | O9        | GORJEE         | 162.856       | N2C       |
| YEQRES         | 162.853       | O13       | KIMFIZ         | 162.711       | N3B       | WARDUP         | 162.495       | C12       |
| EYURUN         | 162.846       | O8        | BASRULO1       | 162.706       | N3        | SUWBOC         | 162.494       | C11       |
| MOJZUG         | 162.846       | O12       | MARDAN         | 162.706       | N24       | JONNUY         | 162.481       | N1        |
| VIBJIA         | 162.845       | O33       | ALELAG         | 162.699       | O3        | DUDLIZ         | 162.479       | C14       |
| YEQSO          | 162.84        | O10       | XUGDEK         | 162.697       | O10       | COSBIW         | 162.477       | O1G       |
| KAGRET         | 162.824       | N2        | UJISAI         | 162.696       | O4        | BEQPAQ         | 162.475       | O6        |
| WISZON         | 162.821       | O1        | MARDAN         | 162.691       | O6        | FAWLAS         | 162.474       | O26       |
| PIRFOL         | 162.816       | N15       | QORJIQ         | 162.684       | O3        | WITCOR         | 162.474       | O6        |
| RATXEQ         | 162.813       | C12       | AROGIA         | 162.681       | O4A       | PAFWEY         | 162.471       | C11       |
| MUJKEI         | 162.813       | O1        | WALBOC         | 162.678       | O5        | PAFWEY10       | 162.471       | C11       |
| FODROG         | 162.812       | N5        | EKOBUK         | 162.677       | O4        | TILSUG         | 162.47        | O3        |
| LAXDOG         | 162.812       | C14       | ECUQAV         | 162.672       | O2        | WEKLOP         | 162.466       | N3        |
| PIRFOL01       | 162.811       | N15       | AZAQOJ         | 162.668       | O5        | EVUJUD         | 162.462       | O3A       |
| RALZUD         | 162.806       | N11       | FUMGOL         | 162.667       | O9        | AHOFUZ         | 162.461       | N2        |
| QIBZAG         | 162.804       | N7        | DIPCEN         | 162.661       | O15       | ZEHMAE         | 162.461       | N1        |
| PAPGUK         | 162.804       | O3A       | FIHYIH         | 162.654       | O5        | CUWNOA         | 162.455       | O10       |
| ITOBES         | 162.801       | O7B       | OGELEV         | 162.648       | O1A       | IBUTIL         | 162.45        | C13       |
| LELSOO         | 162.8         | O10       | TEVHAG         | 162.643       | O5        | WURBEQ         | 162.448       | O16       |
| QUTCIT         | 162.8         | S1A       | JAHNUE         | 162.636       | N5        | PUXTUZ         | 162.444       | O6        |
| GUCQIH         | 162.799       | O7        | CUHKUN         | 162.634       | O2        | MEZNIR         | 162.441       | O13       |

|                |               |           |                |               |           |                |               |           |
|----------------|---------------|-----------|----------------|---------------|-----------|----------------|---------------|-----------|
| UZAFOR         | 162.799       | O10       | WALBOC01       | 162.634       | O7        | MOJKAY         | 162.441       | O36       |
| IPOWUF         | 162.798       | S1        | BASZUU         | 162.63        | O46       | MIYMUC         | 162.428       | O4        |
| <b>Refcode</b> | <b>∠YZnLB</b> | <b>LB</b> | <b>Refcode</b> | <b>∠YZnLB</b> | <b>LB</b> | <b>Refcode</b> | <b>∠YZnLB</b> | <b>LB</b> |
| VAKZUE         | 162.794       | Cl6       | BAYVAB         | 162.628       | Cl14      | XUYTUJ         | 162.427       | N3        |
| NAHHAH         | 162.79        | Cl10      | GIXDOH         | 162.626       | O2        | UMIQOW         | 162.423       | N6        |
| UFANEU         | 162.789       | O1        | LASMEZ         | 162.615       | O10       | RUZVIR         | 162.423       | O14       |
| DOSVAJ         | 162.788       | O6        | DIPCIR         | 162.613       | O18       | DUGYOU         | 162.421       | O4        |
| MARDAN         | 162.784       | O17       | LABQIQ         | 162.598       | O9        | WIBTUW         | 162.415       | O3        |
| ROQKIT         | 162.776       | N1        | QITDAA01       | 162.595       | O3A       | MEBSIX         | 162.397       | N16       |
| LILVAD         | 162.776       | Cl1       | VAKZUE         | 162.593       | Cl3       | XUQZAK         | 162.394       | O4        |
| UGUQUJ         | 162.763       | S1        | LALHUD         | 162.592       | N1        | OKUXUQ         | 162.391       | O14       |
| CUWNOA         | 162.762       | O9        | NEWZIA         | 162.591       | O4A       | MIBSUM         | 162.38        | O8        |
| HABZIX         | 162.761       | O3        | KAKSIC         | 162.587       | O11       | XOQZEJ         | 162.375       | O2        |
| SUWZOC         | 162.759       | O2        | GIZGAA         | 162.582       | O9        | VISCIK         | 162.368       | O12       |
| LUVBAH         | 162.748       | O3        | LIDWAA         | 162.581       | O19       | OHUYIB         | 162.366       | O7        |
| MUHHUT         | 162.746       | F1        | XULZIQ         | 162.58        | O24       | HIDMIT         | 162.35        | N6        |
| ALIQIW         | 162.745       | N3        | XECFUI         | 162.577       | O5A       | MIVDIF         | 162.35        | Cl1       |
| DERTIH         | 162.744       | O6        | DEHPEN         | 162.574       | O8        | UJAQEB         | 162.349       | F8        |
| MOYTUR         | 162.739       | Cl1       | LADSUH         | 162.574       | O9        | BASZUU         | 162.345       | O42       |
| TAZJAH         | 162.735       | N67       | HOXNEO         | 162.568       | N4        | MARDAN         | 162.343       | O23       |
| QIJPUU         | 162.731       | N5        | VIRLAK         | 162.563       | O44       | QANCAJ         | 162.341       | Cl1       |
| ADIZAP         | 162.729       | Cl6       | PUWTOQ         | 162.559       | O8        | XOXBUI         | 162.339       | N5A       |
| BETWOO         | 162.728       | O3        | IGUDEV         | 162.542       | N4        | QAYNAF         | 162.339       | O6        |
| VIBJEW         | 162.728       | O15       | TAZJAH         | 162.536       | O27       | ONOHUV         | 162.339       | S1        |
| ETANOD         | 162.727       | N1        | YOBHOP         | 162.535       | N6        | ZASVUN         | 162.338       | N3        |
| COBRIW         | 162.724       | N2B       | VICXEK         | 162.525       | O7        | ESIRII         | 162.322       | S1        |
| TADCUA         | 162.724       | N4        | XUXQEN         | 162.519       | O13       | FAVHIU         | 162.321       | O5        |
| MARDAN         | 162.721       | N12       | UHUHOV         | 162.518       | O3        | SUWZOC         | 162.313       | O12       |
| VAZZII         | 162.72        | O4        | GIQPAB         | 162.516       | N2        | YAXNIX         | 162.306       | O11       |
| IPOSEO         | 162.718       | N3        | CETRIG         | 162.513       | F4        | XEQNIR         | 162.295       | N1        |
| SADDUY         | 162.292       | N2B       | DAJCIE         | 162.141       | O31       | NABKIK         | 161.949       | O7        |
| EPEYAA         | 162.292       | O5        | FOVGAZ         | 162.137       | O5        | SESPIQ         | 161.948       | O6        |
| OBOHAS         | 162.289       | Cl2       | DUVMUD         | 162.132       | N4        | IQIXAH01       | 161.947       | O9        |
| IMEFOV         | 162.289       | O12       | JILRAB         | 162.127       | N2        | HAGQOV         | 161.943       | O6        |
| CEBLOM         | 162.286       | Cl2       | TEDLUK         | 162.117       | O2E       | TEGRUS         | 161.937       | O6        |
| QORKIR         | 162.285       | O15       | QORJIQ         | 162.113       | O9        | BOWVOA         | 161.932       | F5        |
| EMECUV         | 162.279       | N2        | XIXPUS         | 162.105       | N3        | BOWVOA01       | 161.932       | F5        |
| IFIXOK         | 162.275       | N10       | GICTAN         | 162.098       | O12       | LABPIN         | 161.93        | Cl4       |
| XECJOE         | 162.274       | S2        | FOWQEQ         | 162.095       | Cl1       | ADOMAL         | 161.93        | O3B       |
| MOHRAD         | 162.273       | O4A       | GUHHIC         | 162.091       | O5        | ZAQVEW         | 161.93        | O10       |
| MAGBIH         | 162.255       | N2        | MUJKEI         | 162.089       | O11       | ICUGET         | 161.912       | Cl1       |
| AMOYIL         | 162.252       | O3A       | XOXHOJ         | 162.088       | N3        | VEZYOR         | 161.912       | O5        |
| MIKBUE         | 162.244       | O2        | FOBFUZ         | 162.087       | N2        | QISYAU         | 161.908       | O13       |
| ALUXEM         | 162.243       | N3        | XILRUH         | 162.083       | N2        | HECHAC         | 161.892       | O1        |
| GURPUG         | 162.238       | O10       | CIVQEG         | 162.082       | O4        | SASGEY         | 161.888       | Cl2       |
| JOBPUL         | 162.238       | O9        | TEFQOK         | 162.081       | O8        | MIMSUZ         | 161.866       | O7        |
| VOFNIP         | 162.236       | O8        | XEWGUD         | 162.077       | N2        | HAGQOV         | 161.862       | O4        |
| EMAHUH         | 162.233       | O10       | FONPAZ         | 162.076       | N6        | MARDAN         | 161.858       | N6        |
| PIRFOL01       | 162.232       | N6        | XARFOP         | 162.076       | N1        | DAPNAL         | 161.835       | O5        |
| PIRFOL         | 162.227       | N6        | MUZVUY         | 162.073       | N1        | TAZJAH         | 161.828       | O3        |
| LIMGOF         | 162.226       | O3        | XUSGUN         | 162.073       | O1        | QIRYEX         | 161.817       | O4B       |
| RUDMUZ         | 162.226       | O6        | RUWMUT         | 162.066       | O19       | HIDPOC         | 161.811       | N5        |
| QOMFEF         | 162.219       | O54       | CEYSEF         | 162.061       | O6        | LESGEY         | 161.809       | O1        |
| FELJAK         | 162.211       | O10       | XAYVAX         | 162.061       | O12       | ZUGVEC         | 161.805       | O6        |
| XEFDAQ         | 162.21        | O3        | PELXUA         | 162.056       | N6        | GICLUB         | 161.804       | O23A      |
| NIPWIT         | 162.207       | O1A       | FIQRUT         | 162.051       | O24       | XECWOT         | 161.802       | O1        |
| FEXQAC         | 162.206       | O10       | AVOKOM         | 162.046       | O9        | CUJFOF         | 161.784       | Cl2       |
| NIPWIT01       | 162.204       | O1A       | SUFZAX         | 162.046       | O6        | FEFVAO         | 161.782       | Cl1       |
| RIPSAO         | 162.194       | O3        | LIHYEI         | 162.043       | O14       | CILDOR         | 161.775       | O2        |
| EFASUA         | 162.192       | O16       | HOLNUU         | 162.039       | O2        | FASWED01       | 161.762       | O11       |

|                |               |           |                |               |           |                |               |           |
|----------------|---------------|-----------|----------------|---------------|-----------|----------------|---------------|-----------|
| ETUQEQ         | 162.192       | O2E       | XOHNEO         | 162.036       | O12       | CILDOR01       | 161.754       | O2        |
| IDIFIN         | 162.19        | N4        | ELAMUC         | 162.033       | O3        | DIYXAK         | 161.751       | N3        |
| <b>Refcode</b> | <b>∠YZnLB</b> | <b>LB</b> | <b>Refcode</b> | <b>∠YZnLB</b> | <b>LB</b> | <b>Refcode</b> | <b>∠YZnLB</b> | <b>LB</b> |
| QOYZUC         | 162.189       | N5        | SIDHET         | 162.029       | O2        | LIZYEA         | 161.745       | N12       |
| CAFSAF         | 162.181       | N6        | EXETIN         | 162.028       | O7        | KALJIU         | 161.726       | N4        |
| QUSVEF         | 162.178       | O5        | YUBJEN         | 162.019       | O10       | MODZOX         | 161.722       | N3        |
| GUBQOM         | 162.177       | O4        | DAPNAL         | 162.013       | O7        | POPFOS         | 161.722       | N2A       |
| UTIPUK         | 162.176       | O3A       | EZEJOL         | 162.012       | O11       | NALNIZ         | 161.719       | N3        |
| UJULOC         | 162.173       | O6A       | TAZJAH         | 162.009       | N63       | EBEZEU         | 161.71        | N1        |
| MUVVUW         | 162.17        | F7        | VIBJIA         | 162.002       | O42       | HUMYOG         | 161.708       | O5        |
| SOCGUN         | 162.169       | S2        | LEWHIH         | 161.989       | N3A       | FEPVEE         | 161.703       | O10       |
| PAZLAN         | 162.166       | N2        | KUTRUO         | 161.988       | O11       | HEVSUX         | 161.7         | O2        |
| YEKVET         | 162.165       | N2        | YIQPUK         | 161.987       | O5B       | WEMZUJ         | 161.698       | O4        |
| NIDFAJ         | 162.164       | N4        | SUFZEB         | 161.978       | O6        | NAKPUM         | 161.696       | O12       |
| JAXTAH         | 162.157       | C12A      | HALGUZ         | 161.97        | O23       | LAXFOJ         | 161.691       | O12       |
| MATFIZ         | 162.156       | O3        | WIBGIZ         | 161.97        | O4        | RUPCIQ         | 161.685       | F51       |
| REFLEV         | 162.147       | O4        | NEPPAZ         | 161.961       | O18       | SAQKIF         | 161.682       | O5        |
| TEHROO         | 162.147       | O37       | MIPPIM         | 161.959       | O8        | BODPOB         | 161.681       | N5        |
| ZOJXIH         | 162.143       | N1        | XAXGIN         | 161.956       | C12       | IGAWET         | 161.666       | N12       |
| PIFDIS         | 162.143       | I4        | IZOWEA         | 161.954       | O13       | GUCHAN         | 161.662       | O1        |
| GUCHAN01       | 161.662       | O5        | KEMKIX         | 161.471       | O18       | PAJMUL         | 161.221       | O5        |
| YETJEP         | 161.661       | N4        | KEGKEN         | 161.469       | N3        | NEPPED         | 161.214       | O1        |
| NUDNIL         | 161.659       | O23       | MOJKAY         | 161.464       | O55       | GUVFUY         | 161.213       | O2        |
| KEFNOZ         | 161.651       | F4        | MOKZUJ         | 161.464       | O9        | OYOWIL         | 161.203       | N10       |
| TAXNOW         | 161.648       | O3        | SAJJIZ         | 161.457       | O10       | SUFZAX         | 161.202       | O4        |
| DEPYON         | 161.647       | O5        | KUBTEH         | 161.453       | O6        | ABANAV         | 161.198       | O2A       |
| RAQBAO         | 161.645       | O10       | ZASWEY         | 161.444       | N3        | NEYVAR         | 161.198       | O8        |
| SEHFES         | 161.644       | N3A       | WALBOC02       | 161.439       | O8        | FOJVUX         | 161.195       | O6        |
| YELFED         | 161.642       | O3        | UWEDUW         | 161.438       | O19       | SADFAH         | 161.195       | O7        |
| FAVRUT         | 161.634       | O12       | VICXEK         | 161.413       | O8        | OCIREZ         | 161.194       | C13       |
| QUCYIX         | 161.628       | C16       | TERQEM         | 161.411       | O5        | PAKVOM         | 161.194       | C11       |
| GUCZAG         | 161.623       | O17       | FAXZEN         | 161.409       | N5        | IMEFOV         | 161.193       | O5        |
| ESOUYUG        | 161.621       | O6        | HAGMAG         | 161.409       | O1        | NANVON         | 161.193       | S1        |
| YAVMIS         | 161.602       | O8A       | MAGBIH         | 161.395       | O9A       | PEKVEI         | 161.192       | O19       |
| NIDMOD         | 161.589       | C12       | NEPPAZ         | 161.394       | O19       | RAXNAH         | 161.191       | C11       |
| XUXQAJ         | 161.588       | O1        | CEAMZN         | 161.392       | O3        | TAVCEB         | 161.182       | N6        |
| TAZJAH         | 161.586       | N65       | MACHIJ         | 161.391       | O10       | CEAMZN01       | 161.18        | O2        |
| KARDEM         | 161.586       | O15       | ICUFES         | 161.387       | C11       | VENMIL         | 161.18        | O9        |
| FALNIR         | 161.584       | I1        | PIHNIE         | 161.38        | O3        | OYOWIL         | 161.179       | N18       |
| YEMDIG         | 161.58        | O1        | WIJDAV         | 161.375       | O16       | LUMLOW         | 161.178       | O14       |
| AWUVEV         | 161.574       | N2        | JULDEZ         | 161.37        | O5        | RAMLEA         | 161.175       | O18       |
| FODZAA         | 161.573       | O4        | RONZAY         | 161.369       | O1C       | CUMBUI         | 161.163       | O3        |
| NUMTIA         | 161.57        | N5        | QOFKIF         | 161.366       | O6        | COSBIW         | 161.159       | O4        |
| CAFSEJ         | 161.568       | N6        | NEYTOD         | 161.359       | O8        | QOFKIF         | 161.15        | C14       |
| WAQNAH         | 161.564       | O13       | NETDOJ         | 161.357       | N2        | LERNAZ         | 161.15        | O11       |
| BOJVUR         | 161.561       | N7        | LAVWIO         | 161.353       | O5        | EFUJIA         | 161.147       | O2        |
| QIDQON         | 161.558       | O11       | LIJQOM         | 161.352       | O16       | RAQBAO         | 161.143       | O8        |
| FONPAZ         | 161.555       | N2        | ALIQES         | 161.347       | N6        | CADDEU         | 161.128       | O7        |
| YITQOK         | 161.555       | N1        | NEYTUJ         | 161.336       | O8        | NUQKIW         | 161.116       | N7        |
| HATTEE         | 161.553       | S7        | MARDAN         | 161.325       | O17       | HUVJAL         | 161.114       | O4A       |
| ZARRUJ         | 161.551       | F15       | EBUBEL         | 161.324       | F3        | ESOUYUG01      | 161.107       | O1        |
| MALFOU         | 161.548       | O11       | WIZMAT         | 161.323       | O7        | QUQGAK         | 161.099       | S5        |
| EQOGIB         | 161.546       | O4        | FOWQEQ         | 161.316       | S4        | HAWFEU         | 161.094       | O24       |
| AQEYOK         | 161.536       | C11       | GIWHEA         | 161.314       | N10       | YAXJEP         | 161.094       | Te1       |
| EPEHOZ         | 161.536       | O4        | EFASUA         | 161.312       | O23       | WIJZEV         | 161.093       | N5        |
| SUFZEB         | 161.536       | O5        | KAHMOX         | 161.309       | N1        | VISCIK         | 161.087       | O11       |
| VEMCUM         | 161.536       | O14       | NUKTOD         | 161.307       | C12       | LIRNIL         | 161.083       | O5        |
| WUCGOQ         | 161.528       | N5        | XESJIO         | 161.306       | N2        | WETFIN         | 161.083       | O9        |
| MATNOL         | 161.528       | O9        | IZOWAW         | 161.302       | P2        | ZAMFOI         | 161.08        | N3B       |
| SUFZAX         | 161.525       | O5        | ISODUP         | 161.297       | O8        | ZZZDVY03       | 161.08        | O10       |

|                |               |           |                |               |           |                |               |           |
|----------------|---------------|-----------|----------------|---------------|-----------|----------------|---------------|-----------|
| MARDAN         | 161.511       | O35       | YAFVAC         | 161.291       | N2        | MEJSIG         | 161.077       | N3        |
| WUZNEN         | 161.507       | N3        | MOJKAY         | 161.25        | O9        | YUQQEI         | 161.076       | O1        |
| <b>Refcode</b> | <b>∠YZnLB</b> | <b>LB</b> | <b>Refcode</b> | <b>∠YZnLB</b> | <b>LB</b> | <b>Refcode</b> | <b>∠YZnLB</b> | <b>LB</b> |
| NANHAO         | 161.506       | O8        | PAPFOD         | 161.245       | O3B       | XUXQAJ         | 161.069       | O7        |
| TOPHEN         | 161.501       | CI2       | BUZTEV         | 161.242       | O3        | NANZIM         | 161.058       | S2        |
| LACQIS         | 161.495       | O10       | SUFZEB         | 161.242       | O4        | UKIPAH         | 161.054       | O9        |
| IFIZOM         | 161.488       | O3        | RORSOI         | 161.241       | O4        | CINHOW         | 161.053       | O9        |
| LIZYUQ         | 161.486       | N14       | JULDEZ01       | 161.23        | O6        | CAMPOY         | 161.051       | O2        |
| IREYIO         | 161.479       | O3        | ERUZUP         | 161.23        | F1        | BUWCEE         | 161.05        | O3        |
| ICUFOC         | 161.472       | CI1       | KOZJUH         | 161.223       | O2        | XESJIO         | 161.046       | O6        |
| RUWMON         | 161.038       | F6        | BUBDIN         | 160.785       | O10       | DAYPUQ         | 160.629       | O3        |
| RUZVIR         | 161.03        | O10       | OYOWEH         | 160.779       | N10       | EYERAB         | 160.625       | O1        |
| YOCLAD         | 161.018       | O2        | WIWGEQ         | 160.77        | N1        | FOSQOV         | 160.62        | O21       |
| DASPUJ         | 161.008       | O5        | ZARXUN         | 160.77        | CI1       | XULFEQ         | 160.616       | O8A       |
| QAWLOT         | 161.007       | O2        | IWUSID         | 160.767       | O10       | ZETLER         | 160.615       | O2        |
| NIQLIK         | 161.003       | N16       | YUZQER         | 160.767       | O7        | EYAYAG         | 160.612       | O15       |
| UJAQIF         | 160.987       | N6        | DOMLEX         | 160.758       | O2        | MAKYUS         | 160.611       | O4        |
| WIWGEQ         | 160.986       | O2        | EYERAB         | 160.757       | O43       | EFASUA         | 160.61        | O14       |
| ZASWEY         | 160.983       | N4        | PAJMUL         | 160.755       | O3A       | HUMYOG         | 160.608       | O4        |
| NIKAN          | 160.979       | O5        | VAXVUL         | 160.753       | CI1       | KIXLAG         | 160.608       | O13B      |
| XAVKEN         | 160.978       | O9        | QANTIJ         | 160.75        | CI1       | NEYVIZ         | 160.596       | O8        |
| SAJJIZ         | 160.974       | O5A       | RUDMUZ         | 160.75        | CI1       | EJIPAP02       | 160.591       | N2        |
| AHITUI01       | 160.973       | N4        | NAHJIR         | 160.749       | CI1       | NEYVEV         | 160.589       | O8        |
| XIIKAC         | 160.972       | O12       | BOYSEP         | 160.736       | O10       | YEQXEA         | 160.586       | O2B       |
| RALZUD         | 160.965       | O28       | ZUFQIC         | 160.733       | O5        | FEXPOP         | 160.582       | CI3       |
| XEHYAM         | 160.962       | N6        | DAPNAL         | 160.729       | CI1       | HOSYOE         | 160.575       | N2        |
| UQEVOE         | 160.958       | O8        | IWUSEZ         | 160.722       | O11       | EDANOM         | 160.569       | N3        |
| IGOPAW         | 160.952       | O3        | XODFOM         | 160.72        | O18       | ESYUG          | 160.562       | O4        |
| FAXCUF         | 160.946       | O10       | FASWED         | 160.718       | O21       | DUSTAO         | 160.544       | CI2       |
| PIFDIS         | 160.939       | I3        | ODUPOT         | 160.716       | F7        | LAZHIG         | 160.54        | O3        |
| MOJKAY         | 160.909       | O83       | UNIPUD         | 160.712       | N1B       | FAVRUT         | 160.529       | O12       |
| NEYWEW         | 160.896       | O8        | KAKSIC         | 160.702       | O9        | GOTQUE         | 160.527       | CI8       |
| NEPLIE         | 160.892       | O6        | IWURIC         | 160.701       | O10       | MADRAN         | 160.52        | N6        |
| PICBAE         | 160.888       | CI2       | EPEYII         | 160.7         | O11       | EYERAB         | 160.515       | O10       |
| VARRUD         | 160.888       | O17       | OHIMUQ         | 160.7         | O12       | LIHYEI         | 160.511       | CI2       |
| TURHOD         | 160.887       | N6        | HEBNEJ         | 160.693       | O24       | MOJKAY         | 160.499       | O81       |
| ILORIM         | 160.885       | N16       | WALCIX         | 160.692       | N5D       | DUNXUH13       | 160.495       | O4C       |
| ROBCIU         | 160.876       | O18       | MARDAN         | 160.692       | O28       | QIBYEJ         | 160.491       | N4        |
| DIHNEO         | 160.869       | O9        | IJOYEN         | 160.691       | CI2       | ECEWEP         | 160.489       | O3        |
| GIQYOY         | 160.868       | O3        | DUSVAQ         | 160.69        | CI2       | AHOMOB01       | 160.482       | N1        |
| WENDIE         | 160.865       | O4A       | GAYZOV         | 160.681       | S1        | KUBTOR         | 160.479       | O7        |
| EBUBEL         | 160.863       | O7        | QUKMAM         | 160.681       | S1        | DEFHUT         | 160.476       | O9        |
| DOLVOP         | 160.856       | S2        | AHISAN         | 160.677       | O10       | RAXNAH         | 160.474       | O18       |
| SOXTUW         | 160.854       | O21       | REGRIG         | 160.675       | O12F      | DUCLUL         | 160.471       | O4        |
| QUCYOD         | 160.85        | N2        | VOCNAE         | 160.674       | N7        | RUWMUT         | 160.466       | O23       |
| WALCET         | 160.848       | O8        | QIJPUU         | 160.666       | N4        | OYOWEH         | 160.455       | N18       |
| ULAKIC         | 160.847       | O1        | JAHNUE         | 160.665       | N9        | ODIKOF         | 160.455       | CI6       |
| SOQDAE         | 160.846       | O1        | YOLYIK         | 160.66        | O21       | LEJQAV         | 160.455       | O7        |
| SINWIW         | 160.843       | I4        | ADECIX         | 160.659       | N10       | IYOBUV         | 160.449       | O5        |
| VIBJEW         | 160.842       | CI3       | GAWRAY         | 160.658       | CI2       | SEGHAN         | 160.436       | N6        |
| ADECOD         | 160.841       | N25       | QECNAR         | 160.656       | O8        | NETDOJ         | 160.429       | N4        |
| GUQLUA         | 160.84        | O54       | MARDAN         | 160.655       | O4        | UTEKAG         | 160.429       | O10       |
| IWUREY         | 160.836       | O10       | CAHJII         | 160.65        | O7        | ERIRAZ         | 160.427       | O6        |
| PIWNIU         | 160.829       | O6        | VISCIK         | 160.647       | O1        | JETXIT         | 160.426       | O7        |
| DUPRAI         | 160.827       | O7        | ZIPIU          | 160.646       | CI1       | EFASUA         | 160.418       | O22       |
| AEPYZN         | 160.819       | O2        | OFUGAY         | 160.64        | O5        | SETRAN         | 160.416       | N1        |
| GANGOS         | 160.801       | O1        | ESADUY         | 160.636       | O4        | BACMOJ         | 160.411       | O2A       |
| YAKYUH         | 160.787       | O4        | FERDOY         | 160.631       | N4        | MOPGAB         | 160.407       | N1C       |
| HOVJEK         | 160.786       | O6        | JIWNUB         | 160.63        | O21       | POMNAI01       | 160.4         | N12       |
| RAMLIE         | 160.399       | O21       | EMATAQ         | 160.17        | O10       | FISCEQ         | 159.94        | O9        |

|                |               |           |                |               |           |                |               |           |
|----------------|---------------|-----------|----------------|---------------|-----------|----------------|---------------|-----------|
| NAWLOP         | 160.398       | N2        | YEKWOE         | 160.169       | O2        | WEMPAG         | 159.939       | N8        |
| POMNAI         | 160.393       | N4        | LISZEU         | 160.168       | O9        | RUZQEI         | 159.939       | O6        |
| <b>Refcode</b> | <b>∠YZnLB</b> | <b>LB</b> | <b>Refcode</b> | <b>∠YZnLB</b> | <b>LB</b> | <b>Refcode</b> | <b>∠YZnLB</b> | <b>LB</b> |
| BEQSUP         | 160.391       | O7        | LORKUZ         | 160.167       | N5        | SACWEB         | 159.926       | O2A       |
| ZEFYAM         | 160.382       | N2        | MATNOL         | 160.159       | O12       | DEZJUR         | 159.918       | N4        |
| IKELUG         | 160.382       | O14       | CUHKUN         | 160.156       | O4        | TAZJAH         | 159.914       | O32       |
| KUBNIG         | 160.381       | O7        | MUZWAF         | 160.145       | N6        | FALZOL         | 159.913       | N2        |
| TAYBII         | 160.343       | O5        | DUNXUH14       | 160.143       | O4C       | RAQBAO         | 159.905       | F11       |
| IJIVAZ         | 160.339       | O2        | WUBROA         | 160.132       | O6        | WUPTEI         | 159.904       | O5        |
| PAPCER         | 160.333       | CI4       | NARKEA         | 160.127       | N3        | KAHMOX         | 159.9         | O3        |
| WUBROA         | 160.327       | O4        | XAGNEZ         | 160.123       | O17       | MARDAN         | 159.9         | O23       |
| XAXBIJ         | 160.325       | O2        | IKOSEG         | 160.118       | CI2       | WEMZUJ         | 159.894       | O3        |
| AFUWEG         | 160.323       | N5        | ISIWOZ         | 160.117       | O2        | PAWDIE         | 159.892       | O9        |
| UKESAF         | 160.321       | CI3       | UCOBOE         | 160.109       | O9        | OVESAL         | 159.886       | F2        |
| VIMKOV         | 160.316       | O4G       | REVMEN         | 160.084       | N13       | AWUCUQ         | 159.882       | O8        |
| KARXIL         | 160.309       | O15       | XIZZUB         | 160.083       | O1        | IQUDAA         | 159.882       | O2        |
| ESIWEK         | 160.3         | O6C       | SETVOE         | 160.082       | O8        | IZAPAD         | 159.881       | O2        |
| BERYAC         | 160.285       | N10       | EFASUA         | 160.078       | O23       | DEBSUZ         | 159.875       | O5        |
| ZUJLEX         | 160.281       | CI1       | GUPWOE         | 160.074       | S6        | XUXQEN         | 159.875       | O4        |
| SOQDAE         | 160.277       | O4        | GUVFUY         | 160.072       | N4        | QAJHIU         | 159.872       | CI5       |
| OFUNOW         | 160.276       | O6        | SUYCOF         | 160.069       | N4        | LEWSIT         | 159.847       | N1        |
| EVAJUJ         | 160.273       | O2B       | HIQREF         | 160.065       | N3        | GEVFAR         | 159.837       | O7C       |
| ULAKIC         | 160.266       | O2        | VOCNAE         | 160.063       | N4        | BODPOB         | 159.836       | O2        |
| SUYCOF         | 160.254       | N2        | TEQVIW         | 160.061       | O4        | TEFKOF         | 159.834       | N7        |
| YEFQOR         | 160.254       | F4        | GUCZAG         | 160.06        | O18       | MOMQUC         | 159.829       | O3        |
| XIXPUS         | 160.251       | N4        | KARXOR         | 160.059       | O10       | IKEMUI         | 159.821       | O7        |
| TAZJAH         | 160.251       | O16       | ARAZAX         | 160.057       | O6        | BOFROF         | 159.814       | O5        |
| PAWDEA         | 160.247       | O9        | FEYLIF         | 160.056       | N7        | IMOXEO         | 159.811       | O2        |
| WALCET         | 160.243       | N5D       | HUMYOG         | 160.056       | O6        | FOJZAH         | 159.804       | O16       |
| CAVFEN         | 160.241       | O8        | NEYWAS         | 160.055       | O8        | PIRFOL01       | 159.798       | O3        |
| PUXTUZ         | 160.234       | N6B       | BOFROF         | 160.05        | N3        | PIRFOL         | 159.795       | O3        |
| BEGYUJ         | 160.232       | O2B       | NIDPOF         | 160.049       | N6        | RAQBAO         | 159.79        | F9        |
| DUNXUH12       | 160.229       | O4C       | CEQTIC         | 160.04        | O7        | JEBGED         | 159.786       | O13       |
| VAJXAI         | 160.227       | O5        | YUTTEN         | 160.035       | O10       | FECHIG         | 159.785       | N8B       |
| POMNAI         | 160.22        | O2        | UFUHAE         | 160.034       | O3        | HIYNIN         | 159.783       | N4        |
| POMNAI01       | 160.214       | O3        | WAMZAN         | 160.032       | O3A       | XAVKEN         | 159.781       | O18       |
| EBUBEL01       | 160.211       | F3        | MIBJEO         | 160.03        | N9        | AQAPUE         | 159.779       | O5        |
| GIZGAA         | 160.209       | CI1       | LOWGIQ         | 160.026       | S2        | WALBOC02       | 159.778       | N5D       |
| CIFBUQ         | 160.205       | N1        | JAVCEP         | 160.016       | O3        | DUNXUH21       | 159.773       | O4C       |
| ZAXKOA         | 160.201       | O6        | VAJLID         | 160.015       | CI3       | NASJOI         | 159.767       | N1        |
| MOKZUJ         | 160.2         | N4        | BONNOI         | 160.015       | O8        | DUNXUH08       | 159.763       | O6C       |
| GECWIX         | 160.198       | N2        | ZOJXIH         | 159.991       | N5        | AFUHUE         | 159.762       | O14       |
| NIDFAJ         | 160.198       | N2        | ERUZUP         | 159.987       | F13       | CESKUK         | 159.76        | O11       |
| ZUSBIA         | 160.197       | N4        | LUKDOK         | 159.986       | N1        | CEQTOI         | 159.746       | O7        |
| YOYTUE         | 160.197       | O11       | DIJMOA         | 159.986       | CI5       | LARQAA         | 159.746       | O10       |
| YEYFIT         | 160.193       | O4        | UQUVAE         | 159.973       | N1        | MUPHOX         | 159.746       | O5        |
| FUFVAE         | 160.186       | N3        | UTEKAG         | 159.973       | O9        | CAYGEP         | 159.744       | O12       |
| BEGYUJ01       | 160.181       | O4D       | NIJWAE         | 159.962       | N6        | LOSLEK         | 159.729       | O1        |
| XIZZOV         | 160.174       | O7        | NEYVOF         | 159.956       | O7        | OKENAW         | 159.728       | O4        |
| CEZWIO         | 159.72        | N1B       | PIKYOY         | 159.514       | O6        | NEMVAD         | 159.278       | CI1       |
| PEFHAN         | 159.72        | O7        | JILRAB         | 159.507       | N3        | FUBTIF         | 159.27        | CI1       |
| QOFKIF         | 159.715       | O20       | YELFED         | 159.506       | O9        | FIFXAU         | 159.27        | O5        |
| DERTIH         | 159.709       | N5        | DAJMEJ         | 159.505       | N4        | GAFMIK         | 159.269       | N14       |
| IBESAN         | 159.707       | O6A       | ZASVUN         | 159.502       | N4        | VAZZII         | 159.268       | O21       |
| WEWKAK         | 159.704       | O7        | FULCOH         | 159.498       | O30       | POYPOL         | 159.262       | O2        |
| HIDMIT         | 159.701       | N8        | RAHGUG         | 159.496       | O2        | MUGYUJ         | 159.253       | F2        |
| MOJKAY         | 159.692       | O65       | MUMTOD         | 159.493       | O3        | FIDFUU         | 159.245       | O10       |
| WIWGEQ         | 159.69        | N6        | QUJCUV         | 159.488       | CI2       | PEWFAB         | 159.244       | CI3       |
| IFIYEC         | 159.68        | O13       | FUMGOL         | 159.486       | O11       | CAGLAB         | 159.24        | N1        |
| PILNED         | 159.677       | F4        | WEMWAP         | 159.482       | O1        | IGUFUN         | 159.239       | S2        |

|                |               |           |                |               |           |                |               |           |
|----------------|---------------|-----------|----------------|---------------|-----------|----------------|---------------|-----------|
| DUNXUH06       | 159.67        | O4A       | BABBIQ         | 159.478       | C13       | VEHLUQ         | 159.235       | O56       |
| SOGNAG         | 159.67        | O2        | MIGNUN         | 159.474       | F13       | TEHDOA         | 159.23        | S1        |
| <b>Refcode</b> | <b>∠YZnLB</b> | <b>LB</b> | <b>Refcode</b> | <b>∠YZnLB</b> | <b>LB</b> | <b>Refcode</b> | <b>∠YZnLB</b> | <b>LB</b> |
| BAMSUH         | 159.667       | N4        | HOMHOI         | 159.473       | C11       | XUXPAI         | 159.226       | F1        |
| OYOWEH         | 159.666       | N17       | JIWNOV         | 159.473       | O24       | OBORUV         | 159.22        | O2        |
| PUPVEC         | 159.663       | O3        | XEXVIH         | 159.47        | N5        | NANZIM         | 159.22        | S3        |
| OMOCOK         | 159.661       | S2        | NOJPEJ         | 159.469       | N11       | XABRIE         | 159.215       | O8        |
| CIJXID         | 159.659       | O4        | JESQAA01       | 159.468       | C11       | WUWRUE         | 159.214       | C12       |
| VIRLAK         | 159.657       | O41       | DUNXUH15       | 159.467       | O4C       | BEWBAI         | 159.212       | N4        |
| WOPNUM         | 159.637       | O1A       | MIMSUZ         | 159.465       | O11       | ZARRUJ         | 159.2         | F14       |
| RUYTAG         | 159.629       | C12       | NABMAF         | 159.465       | O7        | EFASUA         | 159.198       | O14       |
| LINYIQ         | 159.623       | N4        | JESQAA         | 159.461       | C11       | NEMTUV         | 159.197       | O4        |
| PAWDOK         | 159.619       | I5        | DUNXUH         | 159.459       | O4C       | AHONIW         | 159.195       | N1B       |
| ETOLAC         | 159.609       | N9        | PAHTIE         | 159.452       | O17A      | YEJNIO         | 159.192       | S5        |
| UVIKAO         | 159.606       | O1        | MOJKAY         | 159.451       | C15       | ZARRUJ         | 159.185       | F11       |
| XIDSOW         | 159.597       | N9        | GIMHEP         | 159.434       | O5        | VIRNUG         | 159.181       | O3        |
| DAPNEP         | 159.596       | O4        | MULQOA         | 159.432       | O6        | RUWMED         | 159.171       | O20       |
| ADABOW         | 159.591       | N3        | PIJGUM         | 159.432       | O5        | LEZGAA         | 159.167       | O10       |
| LIMGEV         | 159.59        | O3        | QIBZAG         | 159.429       | C11       | NOCTUU         | 159.165       | O5        |
| LIHYEI         | 159.581       | O7        | POXLIY         | 159.413       | N2        | AQUHIG         | 159.163       | O3        |
| PAWDAW         | 159.576       | O9        | NOXBK          | 159.413       | O20       | MEJMAT         | 159.162       | O3A       |
| LEJYAE         | 159.568       | O2        | RASXIV         | 159.4         | N1        | UMAWOV         | 159.154       | O16       |
| YUKJET         | 159.566       | C14       | TAVRAK         | 159.398       | O3        | LUMRAO         | 159.151       | F1        |
| JIWNIP         | 159.566       | O24       | MADRUH         | 159.395       | N5        | LUCCEP         | 159.15        | N9        |
| TEHROO         | 159.564       | N13       | MOJKAY         | 159.393       | O71       | NOXBK          | 159.15        | O19       |
| XIQFIO         | 159.561       | O7        | PICBAE         | 159.386       | O9        | OQAJAS         | 159.149       | F1        |
| EPEHOZ         | 159.55        | F6        | VATXIX         | 159.382       | S2        | TUSGAS         | 159.137       | O13       |
| MOJKAY         | 159.539       | O38       | QEDZUW         | 159.381       | C11       | ARARER         | 159.131       | N4        |
| WUWROY         | 159.538       | C12       | ALUXEM         | 159.359       | N2        | DUHHAP         | 159.13        | O5        |
| IROTOZ         | 159.537       | O7D       | MUZROP         | 159.344       | O9        | FOJWAE         | 159.127       | O2B       |
| OSOVEZ         | 159.534       | O3        | VUDMAK         | 159.341       | O11       | VUDMUE         | 159.126       | O11       |
| WETFOT         | 159.534       | O1        | ONIWEO         | 159.333       | O5        | RABCEE         | 159.125       | O3        |
| YIKWIC         | 159.532       | N5        | EVURUJ         | 159.327       | O6        | QIBNOE         | 159.122       | O2A       |
| XIRFEK         | 159.53        | O6A       | VAZZII         | 159.327       | O17       | NUFLUV         | 159.117       | N18       |
| MARTEI         | 159.529       | N7        | HAGHII         | 159.326       | O7        | RUZVAJ         | 159.115       | O16       |
| VIZNUQ         | 159.528       | O23       | REXLIR         | 159.325       | O10       | CEPLUF         | 159.113       | N2        |
| PALXIL         | 159.526       | C12I      | IPAZUV         | 159.314       | N2        | EXETIN         | 159.113       | O4        |
| VIRNUG01       | 159.517       | O2        | TAXNOW         | 159.302       | O2        | KIWZOJ         | 159.112       | O3        |
| XOQZUZ         | 159.516       | O6        | POYNUP         | 159.29        | O1        | NEMVAD         | 159.107       | C12       |
| RAQVOW         | 159.106       | O9        | OYOWIL         | 158.879       | N17       | WUJRUP         | 158.737       | N16       |
| NICWIF         | 159.102       | F6        | ADIZAP         | 158.877       | O15       | SIZPEY         | 158.734       | O5        |
| MARDAN         | 159.091       | O18       | QIBNOE02       | 158.874       | O8A       | KEPPOO         | 158.731       | N4        |
| VIBJEW         | 159.089       | C15       | IWOQEQ         | 158.869       | O7        | ROFLUW         | 158.718       | N7        |
| MUHVIW         | 159.081       | O2B       | TUFHAE         | 158.863       | O8        | PUXTUZ         | 158.709       | N7A       |
| XUXQAJ         | 159.079       | O8        | MIMSOS         | 158.862       | S2        | QUCYUJ01       | 158.7         | N2        |
| YEQRES         | 159.077       | C11       | KARXIL         | 158.855       | O10       | JULDEZ01       | 158.696       | O3        |
| HAGQOV         | 159.071       | N4        | GIJKOD         | 158.853       | N1        | XEYCEL         | 158.694       | O3A       |
| XICMUU         | 159.069       | O2        | NOWSID         | 158.852       | N5        | JUGPEJ         | 158.691       | O6        |
| ZETLER         | 159.068       | O10       | GANGIM         | 158.848       | O5        | KAYYOA         | 158.69        | O1        |
| LAIJFIN01      | 159.062       | S2D       | UJEJUO         | 158.845       | O38       | JUGCIA         | 158.684       | N8        |
| ENECIM         | 159.058       | O10       | ELAMOW         | 158.841       | O4        | WEXFIQ         | 158.68        | O7        |
| MEMQOO         | 159.049       | O8        | NANVON         | 158.841       | O2        | JETVUC         | 158.679       | O5        |
| NOQCAA         | 159.04        | C12       | TUKDOU         | 158.841       | O24       | DEFGEC         | 158.677       | O7        |
| SOPWIF         | 159.04        | C15       | GAFZIZ         | 158.835       | N2        | QIRYEX         | 158.674       | O6        |
| PEWDUR         | 159.038       | C13       | DASQAQ         | 158.834       | O25       | XIJDAX         | 158.668       | C11       |
| LONRAK         | 159.026       | O7        | NEMTUV         | 158.832       | C11       | VIFCAP         | 158.662       | N3        |
| QIBNOE01       | 159.025       | O11A      | HYZCZN         | 158.828       | O3        | MAPNEA         | 158.657       | N1A       |
| NAHJAJ         | 159.02        | C11       | NAJPIX         | 158.816       | O7        | PELXUA         | 158.65        | N3        |
| COQGAS         | 159.014       | O2        | PUDBAT         | 158.812       | N5        | ASIZAG         | 158.65        | O7        |
| LEHNAR         | 159.001       | O12       | UBOYOC         | 158.811       | O11       | VEFWOU         | 158.644       | C12       |

|                |               |           |                |               |           |                |               |           |
|----------------|---------------|-----------|----------------|---------------|-----------|----------------|---------------|-----------|
| JAWVEM         | 158.999       | N2        | URIQES         | 158.809       | F2        | AWEYAE         | 158.644       | O2        |
| UVUFAU         | 158.993       | O3        | DOYBOJ         | 158.807       | O4        | AJAPEH         | 158.638       | O3        |
| <b>Refcode</b> | <b>∠YZnLB</b> | <b>LB</b> | <b>Refcode</b> | <b>∠YZnLB</b> | <b>LB</b> | <b>Refcode</b> | <b>∠YZnLB</b> | <b>LB</b> |
| NUDNIL         | 158.992       | O19       | KILXUC         | 158.805       | O8        | QAKKOD         | 158.638       | O4        |
| SOFZAP         | 158.988       | S1        | EBEZOE         | 158.802       | N2        | LOQLAF         | 158.631       | O6        |
| WUWSIT         | 158.986       | CI2       | GUGYOZ         | 158.798       | O22       | WEHJUR         | 158.631       | O3        |
| UNIQEO         | 158.976       | O5        | KUZLOI         | 158.792       | O6        | NOHDOG         | 158.621       | O8        |
| GONJOL         | 158.973       | I3        | KATHUM         | 158.789       | O5        | RUZVAJ         | 158.62        | O15       |
| JUFFUN         | 158.968       | O9        | OFUNOW         | 158.789       | O7        | UGUKUD         | 158.62        | O5C       |
| KEGKEN         | 158.965       | N5        | NAZSOY         | 158.785       | F4        | XUGDEK         | 158.614       | O11       |
| DUDLOF         | 158.951       | O12       | NEBBAY         | 158.783       | N1        | MENLAS         | 158.608       | N6        |
| EFOROI         | 158.949       | O4K       | ADUGAK         | 158.782       | O4        | RUGXEZ         | 158.6         | N5        |
| AWUCUQ         | 158.943       | O7        | NUQKIW         | 158.781       | N8        | PEWFAZ         | 158.599       | O4        |
| NEVVUL         | 158.939       | O8        | MOTTUM         | 158.78        | N1        | SUQLAU         | 158.593       | O3        |
| XIXCUD         | 158.931       | CI4       | JUQPES         | 158.779       | CI1       | VONCOR         | 158.589       | O13       |
| GEVFAR         | 158.931       | O2        | FIQDAN         | 158.775       | O6A       | EXOFAZ         | 158.586       | N1        |
| KAKFEL         | 158.923       | O9        | EFASUA         | 158.773       | O17       | LEZNIPI        | 158.582       | F6        |
| JIWPAJ         | 158.918       | O7        | XEXVIH         | 158.766       | N1        | ZODKEI         | 158.575       | CI2       |
| MAKSUN         | 158.916       | O10       | XEMPEN         | 158.766       | O8A       | LUMRAO         | 158.574       | F2        |
| LUMCED         | 158.909       | O11       | ZAPXUN         | 158.766       | F16       | ZEQLEO         | 158.573       | O2        |
| YEGYUH         | 158.904       | Se2D      | HAWWAE         | 158.761       | O5        | FOZGIN         | 158.571       | O9A       |
| CEBLOM         | 158.897       | CI3A      | MAVKIG         | 158.761       | O3E       | YELFED         | 158.571       | O6A       |
| CIBKUX         | 158.892       | O1        | MEJMAT         | 158.758       | O3A       | PULWOJ         | 158.563       | O2        |
| QUSVEF         | 158.892       | O6        | CAFHEZ         | 158.754       | CI5       | MAPNEA         | 158.558       | N2A       |
| MIGXIM         | 158.889       | N1B       | EBEZOE         | 158.743       | N1        | TUKFIQ         | 158.554       | O24       |
| SEQRIS         | 158.889       | O2        | NIDFAI         | 158.743       | N4        | RUVHIA         | 158.537       | CI2       |
| ZEBKAS         | 158.885       | N1        | MEBSIX         | 158.742       | N15       | TEDSAX         | 158.537       | O9        |
| EJIPAP01       | 158.883       | N8        | TAVRAK         | 158.742       | CI2       | VARFAY         | 158.537       | O3B       |
| IZOWAW         | 158.881       | O27       | VIVNOF         | 158.742       | O8        | DEDVUF         | 158.536       | O8        |
| ITAFEQ         | 158.521       | N2        | MOJKAY         | 158.31        | O70       | DUJVUC         | 158.11        | O4        |
| DEDVUF         | 158.518       | O3        | PELXUA         | 158.309       | N1        | MUMTOD         | 158.11        | O2        |
| TUKDUA         | 158.509       | O24       | SIHFAT         | 158.308       | O2        | JIWNOV         | 158.108       | O10       |
| FAKXAT         | 158.506       | O3        | ZIWR0P         | 158.3         | O14A      | LABQOW         | 158.108       | O10       |
| EQEROJ         | 158.498       | O11       | AHITUI         | 158.299       | N4        | DIDTAP         | 158.101       | N1        |
| YUXWEV         | 158.492       | O11A      | VUKYAE         | 158.296       | S1B       | JOMGOK         | 158.092       | N14       |
| SIGGAT         | 158.489       | CI2       | MAZLOO         | 158.284       | O13       | PUNQIZ         | 158.09        | O33       |
| XIDSOW         | 158.485       | N2        | CAXPUM05       | 158.28        | O1        | HEXROV         | 158.088       | CI1       |
| CACBEQ         | 158.478       | N6        | MOJKAY         | 158.278       | O77       | ZNGLUD         | 158.088       | O6        |
| KUHWIU         | 158.469       | N1A       | ZERVOJ         | 158.272       | O4A       | TIBQAA         | 158.086       | S1B       |
| IPUKIQ         | 158.468       | CI2       | VONTOK         | 158.272       | S6        | LETLUU         | 158.08        | S4        |
| DOSTUB         | 158.467       | O5        | IZOWAW         | 158.268       | O27B      | NOPCUQ         | 158.077       | CI1       |
| XULZIQ         | 158.462       | O18       | WUJRUP         | 158.264       | O1        | QOCXOV         | 158.077       | CI2       |
| GOPFEZ         | 158.459       | I1        | YATKAG         | 158.262       | O4        | MOHLEB         | 158.067       | N3        |
| DELWUQ         | 158.457       | S11       | MOJKAY         | 158.253       | O17       | MARDAN         | 158.059       | O4        |
| YUKJET         | 158.456       | CI2       | CAXPUM02       | 158.251       | O1        | YIKTUL         | 158.058       | O1        |
| GITWOX         | 158.456       | O13       | PEWDUR         | 158.251       | O4        | QELNOO         | 158.056       | Se2       |
| WUWRIS         | 158.453       | CI2       | QORJIQ         | 158.24        | O7        | SUSDES         | 158.052       | O5        |
| QOCVIN         | 158.452       | F8        | XEPKUA         | 158.237       | N4        | IXACUF         | 158.049       | O5        |
| YEJNUA         | 158.446       | N14       | BASFEJ         | 158.237       | O3        | ITAFEQ01       | 158.048       | N2        |
| NOJVEO         | 158.442       | O1        | LUBPEG         | 158.231       | O9        | MAVZEP         | 158.045       | N3        |
| NEPNON         | 158.441       | N2        | XANVIR         | 158.228       | O6        | BODPOB         | 158.043       | O8        |
| OWAJII         | 158.441       | O27       | IKELUG         | 158.224       | O15       | ESISIK         | 158.043       | O6        |
| QIBYEJ         | 158.43        | CI5       | LOSCEC         | 158.218       | O3        | IFAHEC         | 158.042       | O36       |
| UGEZIR         | 158.416       | O8        | IJEDOR         | 158.214       | O6        | KINYOY         | 158.042       | O1        |
| TURHOD         | 158.415       | O2        | QAMLUL         | 158.208       | N4        | JIWNIP         | 158.041       | O10       |
| WUJRUP         | 158.409       | N16       | LONRAK         | 158.208       | O9C       | HAJLOV         | 158.028       | O7A       |
| BASZUU         | 158.409       | O42       | DOKKEU         | 158.201       | CI2       | NORCIJ         | 158.02        | N2O       |
| LUGREK         | 158.408       | O1        | VONCOR         | 158.195       | O3        | REHGAN         | 158.019       | O4        |
| NUFLUV         | 158.406       | N7        | FODZAA         | 158.181       | O1        | UPIGAC         | 158.018       | N10       |
| KAMLER         | 158.405       | O18       | SARCIA         | 158.176       | O47       | RUWMED         | 158.016       | O44       |

|                |               |           |                |               |           |                |               |           |
|----------------|---------------|-----------|----------------|---------------|-----------|----------------|---------------|-----------|
| LUMCIH         | 158.399       | O11       | KELTUR         | 158.173       | O1        | FUNBAU         | 158.006       | O9        |
| XOQZUZ         | 158.398       | O3        | GIXPAG         | 158.172       | O5        | KEKHEP         | 157.998       | O5        |
| <b>Refcode</b> | <b>∠YZnLB</b> | <b>LB</b> | <b>Refcode</b> | <b>∠YZnLB</b> | <b>LB</b> | <b>Refcode</b> | <b>∠YZnLB</b> | <b>LB</b> |
| DOBNEP         | 158.393       | CI1       | ZZZDVY02       | 158.172       | O11       | YELFIH         | 157.998       | O4        |
| GUVFUJ         | 158.39        | CI2       | MOJKAY         | 158.167       | O83       | ODUPOT         | 157.998       | F7        |
| LIRNOR         | 158.388       | O3V       | IFIZOM         | 158.167       | S1        | OMIDAQ         | 157.997       | N5        |
| YAYQOG         | 158.381       | O57       | JUFSAG         | 158.164       | N5        | GIXNOU         | 157.995       | N6        |
| MOKZUJ         | 158.38        | O10       | FIQRUT         | 158.164       | O4        | XIKSAL         | 157.995       | N4        |
| QORKIR         | 158.378       | O16       | VAZZII         | 158.149       | O17       | WARFAX         | 157.988       | O4        |
| PAWDOK         | 158.376       | O18       | IKASEV         | 158.148       | O6        | LODNOK         | 157.987       | N7        |
| WIJVUJ         | 158.374       | O3        | PIBLAQ         | 158.143       | O4        | PUDBIB         | 157.987       | N4        |
| ITAFEQ         | 158.369       | O5        | GEFSOC         | 158.142       | O9        | VAJLUP         | 157.987       | O3        |
| QOMFEF         | 158.361       | O45       | URISOG         | 158.141       | N6        | ZNGLUD01       | 157.98        | O6        |
| FOCLUH         | 158.356       | O1        | ITAFEQ01       | 158.14        | O5        | OHAHEL         | 157.979       | O10       |
| BIRJOD         | 158.344       | N5        | RUWMED         | 158.137       | CI1       | BODBIF         | 157.977       | O6        |
| HAZQIJ         | 158.333       | N4        | REHGAN01       | 158.137       | O6        | BOZYIA         | 157.976       | O8A       |
| QIDQIH         | 158.33        | N1B       | SOPNOB         | 158.127       | O3        | QIJZAN         | 157.97        | O6        |
| OHUTOC         | 158.327       | N2        | UHEZIT         | 158.126       | O9        | FAXZIR         | 157.954       | N5        |
| MICTAW         | 158.314       | O3        | PIBLAQ01       | 158.123       | O4        | CORLOM         | 157.953       | N2        |
| GUQTOB         | 157.951       | N1A       | QAKKUJ         | 157.774       | O8        | SUYCOF         | 157.569       | N8        |
| LOZDIP         | 157.95        | O7        | AREGAF         | 157.764       | O2        | VIRLAK         | 157.566       | O18       |
| NAHLUH         | 157.947       | CI2       | TUKFAI         | 157.761       | O24       | POMNAI01       | 157.564       | N3        |
| VAMMOM         | 157.947       | O1        | KARDEM         | 157.76        | O10       | CAYWIK         | 157.564       | O7        |
| GEHYEB         | 157.945       | O8        | BIBGOJ         | 157.759       | O2        | PEMBOY         | 157.56        | O8        |
| GOGHIT         | 157.941       | O7        | LAKPIY         | 157.758       | O1        | KATHUM         | 157.558       | CI1       |
| RABCEE         | 157.927       | O7        | RAGLUJ         | 157.757       | S2        | RAFWUS         | 157.558       | O6        |
| AMERIT         | 157.926       | O12       | XULZIQ         | 157.749       | O10       | POMNAI         | 157.554       | N13       |
| ODIPAU         | 157.917       | O12       | OFUGAY         | 157.74        | O16       | TOKZIF         | 157.554       | O2        |
| RAPZAM         | 157.911       | O3        | MIBHIQ         | 157.738       | N4        | VAKTIO         | 157.551       | N1F       |
| PUNQIZ         | 157.898       | O9        | RORSOI         | 157.736       | O1        | DEJLEK         | 157.539       | O10       |
| ICOSIF         | 157.893       | O10       | HAJBAW         | 157.734       | O2C       | BOVNIK         | 157.532       | O7        |
| EQEJEQ         | 157.891       | O3        | VOTJOG         | 157.712       | S1        | VIRLAK         | 157.532       | O12       |
| IQEYOU         | 157.891       | O2        | ADIZAP         | 157.707       | O9        | YONPUN         | 157.512       | CI2       |
| QANCAJ         | 157.891       | O1B       | PAWDOK         | 157.707       | O19       | ENEYAA         | 157.511       | O4        |
| TOVYUA         | 157.885       | N3F       | MOSNEN         | 157.702       | O7        | PAGSUP         | 157.51        | O1D       |
| ZOJNET         | 157.882       | I1        | CIDTUH         | 157.701       | N2A       | QUCYUJ01       | 157.507       | N7        |
| FALBOC02       | 157.878       | N3B       | MAPHAO         | 157.695       | O9        | VAQZUK         | 157.5         | O2        |
| FODNAQ         | 157.87        | O11       | OMIDAQ         | 157.692       | N6        | TIDJAR         | 157.499       | O11       |
| NAHGIO         | 157.865       | O16       | DUBMAR         | 157.691       | O3        | UMEVIS         | 157.498       | S1A       |
| PUWTOQ         | 157.864       | O7        | MIMSOS         | 157.686       | S1        | GAYZOV         | 157.474       | N2        |
| KUBTEH         | 157.863       | O18       | BEMPIU         | 157.685       | O5        | HIBMEM         | 157.474       | O10       |
| XAVKEN         | 157.862       | O7        | IQEJUK         | 157.684       | O5        | QAVCID         | 157.465       | O5        |
| ZOJXIH         | 157.859       | N8        | LOSLEK         | 157.683       | O3        | XAVKEN         | 157.465       | O11       |
| VODMAD         | 157.857       | O6        | LECWEX         | 157.678       | O8        | HEZFAU         | 157.464       | CI5       |
| WANFOI         | 157.856       | O2A       | UKAQAB         | 157.676       | O22       | LUMCIH         | 157.464       | O11       |
| ZNGLUD02       | 157.855       | O6        | VIZPAY         | 157.67        | O22       | DUDLOF         | 157.462       | I2        |
| NEMTUV         | 157.853       | CI2       | RAMGES         | 157.667       | O4        | MOKZUJ         | 157.461       | O8        |
| XEVQIB         | 157.851       | CI3       | IBICOL         | 157.666       | CI1A      | TAZJAH         | 157.458       | O35       |
| NETKIK         | 157.849       | N1B       | LALTAV         | 157.663       | O5        | IZAVEK01       | 157.451       | O2        |
| RAGVIH         | 157.849       | O1C       | ACORAN         | 157.662       | O3        | IMOXEO         | 157.445       | N5        |
| EBEZEU         | 157.844       | N2        | COLBUB         | 157.662       | O2        | SIDJOG         | 157.441       | N2F       |
| LUMCED         | 157.84        | O11       | AJOWED         | 157.652       | O4A       | SUYCOF         | 157.441       | N10       |
| PUXTIN         | 157.839       | N5A       | OFIQUS         | 157.652       | F8        | RUZQIM         | 157.441       | O9        |
| MOSNEN         | 157.835       | O6        | ZEJYAR         | 157.647       | O9        | DUJWAJ         | 157.436       | O2        |
| VIQZAX         | 157.835       | O10       | CIWVAG         | 157.643       | O2        | XEYCOW         | 157.435       | O5        |
| PUXTIN01       | 157.834       | N5A       | GAKTES         | 157.638       | O4        | WENPIO         | 157.434       | CI1       |
| EMEZOM         | 157.818       | O2        | WIBTUW         | 157.636       | CI2       | KAVGOH         | 157.433       | O2        |
| LIHYEI         | 157.815       | O13       | YADZUA         | 157.634       | CI1       | VONMIU         | 157.432       | O1        |
| YATKAG         | 157.81        | O1        | SUYCOF         | 157.621       | N6        | RADWOI         | 157.429       | O4        |
| QOMFEF         | 157.808       | O56       | AZOHEC         | 157.619       | O12       | VOFNIP         | 157.425       | O7        |



|                |               |           |                |               |           |                |               |           |
|----------------|---------------|-----------|----------------|---------------|-----------|----------------|---------------|-----------|
| DINDIP         | 157.799       | O10       | YAYQOG         | 157.613       | N16       | MAKYUS         | 157.421       | N7        |
| DUWJUC         | 157.799       | O9        | ZITSAY         | 157.613       | O7        | EQERUP         | 157.416       | O5A       |
| <b>Refcode</b> | <b>∠YZnLB</b> | <b>LB</b> | <b>Refcode</b> | <b>∠YZnLB</b> | <b>LB</b> | <b>Refcode</b> | <b>∠YZnLB</b> | <b>LB</b> |
| HUZDUD         | 157.793       | O1D       | GUBFAK         | 157.611       | O7        | AWOFOK         | 157.415       | Cl3       |
| GAKDAX         | 157.791       | Cl1       | GECVUI         | 157.61        | N2        | JUFEOE         | 157.414       | O2        |
| GIQPAB         | 157.788       | N1        | ONOHUV         | 157.605       | S2        | MARDAN         | 157.413       | O26       |
| CAZFES         | 157.777       | N1        | SIJREJ         | 157.585       | O6        | RIZREY         | 157.41        | O11       |
| FISDIY         | 157.774       | O6        | DAPNEP         | 157.574       | O8        | SUVPEH         | 157.406       | O36       |
| LIJQOM         | 157.774       | O11       | QORFEI         | 157.573       | O4        | MEGNUM         | 157.405       | O4F       |
| NOPSUI         | 157.401       | N3        | JULDEZ         | 157.189       | O2        | TAYFIJ         | 156.984       | O6        |
| POTVUR         | 157.394       | N1        | WALBOC02       | 157.189       | O6        | OFUNOW         | 156.983       | O6        |
| RUZQEI         | 157.393       | N1        | ELAMUC         | 157.188       | O4        | JIWNUB         | 156.981       | O13       |
| EZEJOL         | 157.39        | O11       | ASUXUJ         | 157.182       | O12       | EBALAY         | 156.975       | O8        |
| TULLUJ         | 157.389       | F1        | TEJQOQ         | 157.174       | O5        | DANNUE         | 156.972       | O28       |
| LABQIQ         | 157.382       | O6        | QIFKOJ         | 157.172       | O6B       | LUJKEI         | 156.966       | N3        |
| WOHQIV         | 157.378       | O6        | OJPIJ          | 157.171       | N5        | UVIKES         | 156.965       | O8        |
| PUDBUN         | 157.374       | N4        | LINVOW         | 157.166       | F4        | PUXNEB01       | 156.961       | O3        |
| UGEZEN         | 157.37        | O8        | MIQVEP         | 157.163       | N1        | GOPBIZ         | 156.96        | N5        |
| PUXNEB         | 157.368       | O3        | PEJWUX         | 157.16        | O8        | MIQVAL         | 156.96        | N1        |
| MOSKAJ         | 157.36        | O2A       | QUZWEO         | 157.158       | O4A       | NIYNUG         | 156.96        | O2        |
| NEVBAT         | 157.359       | Cl1       | MOJKAY         | 157.148       | O59       | IQIXAH01       | 156.958       | O7        |
| DAYPUQ         | 157.358       | O5        | PIKVAJ         | 157.145       | N4        | VIQMEO         | 156.955       | O8        |
| KAGSUJ         | 157.345       | N5        | BIKTOH         | 157.139       | Cl1       | AGEXAP         | 156.951       | O8        |
| IGOPAW         | 157.343       | O5        | PAFWEY         | 157.135       | O5        | PUXNEB         | 156.951       | O3        |
| JOGBAK         | 157.342       | O2        | PAFWEY10       | 157.135       | O5        | VOMSEW         | 156.95        | I2        |
| GIQTOQ         | 157.338       | Cl2       | SERCOI         | 157.134       | Cl1       | SIQTUJ         | 156.948       | N2        |
| SEBBAF         | 157.338       | O17       | KODYOT         | 157.132       | Cl1       | LEJQAV         | 156.945       | O6        |
| PEWFED         | 157.337       | O4        | SIVXEC         | 157.13        | N1        | VAJLID         | 156.934       | Cl4       |
| NENCOZ         | 157.33        | O5        | MOMQUC         | 157.126       | O4        | LODQOK         | 156.932       | N1        |
| XUYVAS         | 157.324       | O5        | RAQBAO         | 157.118       | O6        | MARDAN         | 156.927       | O10       |
| XEVVUT         | 157.322       | S2        | MEPXEL         | 157.115       | O9        | CUBWIG         | 156.924       | O2        |
| ULIBOG         | 157.317       | N1        | SUWBOC         | 157.113       | O4        | MOYNIA         | 156.92        | O7        |
| DUWJUC         | 157.313       | O13       | IGUQOQ         | 157.109       | O4        | CUXLOZ         | 156.918       | O3        |
| MIMRAB         | 157.306       | O2F       | OPOBAX         | 157.109       | O3A       | LIHYEI         | 156.917       | O16       |
| OZUNEF         | 157.302       | O4A       | VELROV         | 157.107       | O8        | PEJWUX         | 156.917       | O8        |
| PUXNEB01       | 157.301       | O3        | BOPZAJ         | 157.105       | N1        | IJOSEH         | 156.908       | O5        |
| ZOGER          | 157.301       | O6        | CEXTAB         | 157.105       | O2        | NANZIM         | 156.9         | S5        |
| GABBOD         | 157.3         | O8        | MOJKAY         | 157.096       | O37       | NOCGUH         | 156.898       | N6        |
| IQUMIQ         | 157.298       | Cl1       | DUKBHU         | 157.077       | N2        | KADSEP         | 156.895       | O2        |
| JIDXEC         | 157.289       | N15       | DIFWEU10       | 157.071       | Cl2A      | ROFLUW         | 156.891       | N10       |
| RUWMED         | 157.284       | O49       | NAQLAT         | 157.053       | O17       | CANJEK         | 156.871       | O8        |
| PAWCUP         | 157.263       | O13       | WUJRUP         | 157.051       | N18       | OCIFUE         | 156.867       | N3        |
| AZIXUD         | 157.26        | N3        | ADOBAY         | 157.05        | N1        | RIWWOK         | 156.866       | O2C       |
| SARXAO         | 157.252       | N1        | OFIQUS02       | 157.047       | F8        | BINKUI         | 156.86        | O15       |
| AWUCUQ         | 157.251       | O2        | RAFVED         | 157.043       | O10       | IHECAB         | 156.859       | N4B       |
| MADRUH         | 157.25        | N6        | YELFIH         | 157.04        | O4K       | POXDIQ         | 156.859       | O5        |
| AJOWON         | 157.24        | O4A       | UFANEU         | 157.033       | O2        | LINVOW         | 156.842       | F39       |
| AWUCUQ         | 157.24        | O3        | RUZVIR         | 157.031       | O8        | JULDEZ01       | 156.837       | O5        |
| ZITMIB         | 157.236       | N6E       | TULLUJ         | 157.031       | F8        | VIRLAK         | 156.834       | O46       |
| KAPBEJ         | 157.236       | O9        | FOBFIO         | 157.028       | I2        | RAJHIU         | 156.832       | O2        |
| AWUVEV         | 157.231       | O7        | KITZOD         | 157.024       | O5        | HATVOQ         | 156.828       | N4        |
| VUYBEX         | 157.218       | O1        | KILYAJ         | 157.008       | O24       | JIDXEC         | 156.824       | N1        |
| UKIPAH         | 157.217       | O17       | YESFOS         | 157.008       | O4C       | DAWQOK         | 156.824       | O12       |
| XIQFIO         | 157.217       | O8        | LUBPEG         | 157.005       | O1        | QUDKAC         | 156.816       | O8        |
| LIDWAA         | 157.213       | O17       | TEHROO         | 157.004       | O40       | UJEYEP         | 156.813       | N8        |
| MAPMUP         | 157.207       | N1B       | XUQCOB         | 156.997       | N10       | XABROK         | 156.807       | N2        |
| HIJSIG         | 157.203       | O3        | XACGUD         | 156.994       | N4        | CAYWEG         | 156.807       | O23       |
| VELROV         | 157.197       | O7        | MIBJAK         | 156.991       | O5        | AQOHAQ         | 156.804       | O4        |
| MURJIV         | 156.803       | N6        | KEPPEE         | 156.626       | N4        | MEBSUJ         | 156.42        | F2        |
| WANFUO         | 156.798       | O2A       | PEWGII         | 156.624       | N2        | FESTOQ         | 156.419       | O17       |

|                |               |           |                |               |           |                |               |           |
|----------------|---------------|-----------|----------------|---------------|-----------|----------------|---------------|-----------|
| FUWXOL         | 156.797       | N4A       | BUSLOS         | 156.62        | N7        | MIYMUC         | 156.418       | O5        |
| KAMHIS         | 156.777       | O6        | DASQAQ         | 156.616       | O4        | CAYWIK         | 156.415       | O15       |
| <b>Refcode</b> | <b>∠YZnLB</b> | <b>LB</b> | <b>Refcode</b> | <b>∠YZnLB</b> | <b>LB</b> | <b>Refcode</b> | <b>∠YZnLB</b> | <b>LB</b> |
| ZAFKAV         | 156.776       | O5        | RUZVIR         | 156.613       | O9        | IBONOD         | 156.412       | O8        |
| VIRLAK         | 156.775       | O16       | PAYCAX         | 156.611       | N10       | LAJFIN         | 156.4         | S1D       |
| XUSGUN01       | 156.775       | O2        | XUSGUN         | 156.609       | O2        | UBOYOC         | 156.393       | O12       |
| CUWMEN         | 156.774       | O6        | HOQJUS         | 156.594       | N2        | IBUSUW         | 156.39        | C14       |
| AMERIT         | 156.771       | O4        | SABHAF         | 156.594       | O9        | WALCET         | 156.388       | N3B       |
| GOCMUI         | 156.768       | O5A       | LOCWAE         | 156.587       | O4        | UZANUF         | 156.386       | O5        |
| IRINUT         | 156.756       | N3        | SIJREJ         | 156.585       | O4        | WAJGAQ         | 156.385       | O8        |
| HIJSOI         | 156.756       | O1        | LUFVAM         | 156.57        | O3        | WALCIX         | 156.382       | N3B       |
| SEGHAN         | 156.755       | S2        | XEHFIC         | 156.567       | O9        | MARDAN         | 156.376       | O36       |
| RATJUT         | 156.754       | F5        | RAXNAH         | 156.566       | O8        | ROBCEQ         | 156.375       | O25       |
| EBIZUM         | 156.753       | C13A      | MEMPAV         | 156.559       | O9        | RORSOI         | 156.372       | N9        |
| INAKOA         | 156.752       | O1        | TIRJAH         | 156.554       | O3        | EWESAD         | 156.36        | N7        |
| TAZJAH         | 156.75        | O8        | IGAWET         | 156.551       | N8        | BEMHAE         | 156.36        | O20       |
| HUNMUA         | 156.747       | O2A       | CEMPUJ         | 156.544       | O2A       | WASFIF         | 156.357       | O5        |
| XECTEG         | 156.746       | O2        | FUJNEF         | 156.544       | O4B       | GAVNAV         | 156.356       | O6        |
| KAFLUB         | 156.736       | S1A       | TIRHOT         | 156.543       | O6        | NARKEA         | 156.356       | O9        |
| HYZCZN         | 156.734       | N4        | VOMSEW04       | 156.542       | I2        | AHOMUH         | 156.349       | N2        |
| SOKQIU         | 156.73        | O1        | IDAVIT         | 156.535       | O10       | SIRVIC         | 156.342       | S3        |
| VEZYOR         | 156.727       | O6        | FOJQAY         | 156.534       | N6A       | NESGAU         | 156.341       | N1        |
| NOQCEE         | 156.725       | C12       | OPOBAX         | 156.526       | N2        | NUKTOD         | 156.338       | O8        |
| BAZSII         | 156.725       | O3A       | TAHFEO         | 156.518       | N2        | HIKMUM         | 156.334       | N5        |
| CABPEE         | 156.723       | O12       | QASPAE         | 156.507       | N8        | LUZZAI         | 156.325       | N2B       |
| MIXLAI         | 156.721       | O2        | GUJFIB         | 156.503       | O2C       | NOQCII         | 156.324       | C12       |
| HOVRAM         | 156.716       | N2        | EZEJOL         | 156.502       | O18       | MIMRAB02       | 156.323       | O1A       |
| ROJVIW         | 156.716       | O4B       | MUYPIH         | 156.499       | O8        | AJAPEH         | 156.314       | O10       |
| YEFQOR         | 156.714       | F2        | SIBMIC         | 156.493       | N4A       | HIHBUX         | 156.313       | O1        |
| MARDAN         | 156.712       | O6        | IDAVIT         | 156.493       | O11       | ZEFYAM         | 156.313       | O8        |
| MIPYIU         | 156.706       | O6        | AFUHUE         | 156.491       | O9        | OWABOE         | 156.311       | N2        |
| WARFAX         | 156.705       | O7        | XAXGIN         | 156.486       | C11       | IFABIA03       | 156.306       | O2E       |
| LERNAZ         | 156.701       | O12       | TITRIY         | 156.486       | O4        | YUBFUX01       | 156.304       | N1J       |
| QOMFEF         | 156.701       | O51       | MOJKAY         | 156.481       | O66       | FEMNOE         | 156.303       | N5        |
| QULHUC         | 156.701       | O5        | IYEYOC         | 156.478       | N7        | ZZZDVY04       | 156.301       | O9        |
| WEWPIB         | 156.696       | O10       | JITRIR         | 156.469       | O1        | AQERUJ         | 156.297       | C14       |
| YIMXIC01       | 156.693       | O2B       | UDOMIK         | 156.464       | O8        | URIRIX         | 156.294       | O2        |
| ODUPOT         | 156.686       | F28       | LIJQOM         | 156.463       | O15       | QIBZAG         | 156.29        | O3        |
| YEJNUA         | 156.679       | N13       | XUXQEN         | 156.458       | O5        | DUDQUR         | 156.287       | O6        |
| VOFNOV         | 156.673       | O14       | LIYDUS         | 156.448       | O4        | ULOWOH         | 156.287       | O12       |
| CIXZOA         | 156.668       | C13       | TEGFOB         | 156.448       | S2        | NUYPUV         | 156.283       | O5        |
| DOMFOC         | 156.66        | N2A       | XARVEV         | 156.447       | O15       | NHBZZN10       | 156.269       | O2C       |
| NAXVOB         | 156.651       | O3        | HISWAK         | 156.445       | O6C       | RUHWIA         | 156.265       | O4        |
| TEZKUF         | 156.648       | O4        | SUWCEU         | 156.442       | O1A       | DUVHIN         | 156.264       | O2        |
| MEPXEL         | 156.643       | O11       | OFIQUS01       | 156.441       | F8        | IFABIA01       | 156.263       | O1B       |
| BOHYED         | 156.641       | O11       | MULQOA         | 156.434       | O11       | QARVIP         | 156.261       | O9        |
| VIZPAY         | 156.63        | O22       | UKIMEI         | 156.431       | O3        | OYOWIL         | 156.26        | O17       |
| ZNTATE10       | 156.627       | N6        | VIQZAX         | 156.424       | O12       | VAJSUW         | 156.249       | O5        |
| HEFRES         | 156.247       | N1        | WUDMAJ         | 156.107       | O2        | BUBSOJ         | 155.898       | O1        |
| YEHYOB         | 156.247       | O5        | YADZUA         | 156.105       | N4        | LEQWIP         | 155.893       | O1A       |
| OHANIW         | 156.238       | O12       | NAZZOG         | 156.1         | O5        | GUBQOM         | 155.889       | O3        |
| VOMSEW03       | 156.237       | I2        | QIDREE         | 156.099       | O5        | JISNEF         | 155.889       | O2        |
| IDIFIN         | 156.233       | O2        | OQAJAS         | 156.096       | O6        | OVIQER         | 155.889       | O8        |
| EPUVUH         | 156.227       | O9        | TURHOD         | 156.093       | O6        | DUJTOU         | 155.879       | O2        |
| UVIKAO         | 156.226       | O10       | POMRIT         | 156.088       | S2        | POCVAG         | 155.87        | N7        |
| YUXWEV         | 156.226       | O12A      | BEJQAJ         | 156.086       | O7        | GESNAW         | 155.865       | N6        |
| WAGJEV         | 156.225       | N3        | DORHID         | 156.086       | O6        | LAHMAL         | 155.865       | N2        |
| KUYGER         | 156.223       | O3        | KUBTEH         | 156.082       | O5        | MOJKAY         | 155.861       | O78       |
| NOPCOK         | 156.221       | O9        | JAVJIA         | 156.078       | O5        | AZAQOJ         | 155.856       | O6        |
| ROBCEQ         | 156.218       | O37       | BUNMEE         | 156.077       | O15       | EFASUA         | 155.854       | O15       |

|                |               |           |                |               |           |                |               |           |
|----------------|---------------|-----------|----------------|---------------|-----------|----------------|---------------|-----------|
| NAZZOG01       | 156.216       | O1        | LUGTAJ         | 156.073       | O1        | UGEZEN         | 155.85        | O2        |
| KIBZAX         | 156.21        | O6        | NENCOZ         | 156.066       | O4        | YEQSOF         | 155.842       | O4        |
| <b>Refcode</b> | <b>∠YZnLB</b> | <b>LB</b> | <b>Refcode</b> | <b>∠YZnLB</b> | <b>LB</b> | <b>Refcode</b> | <b>∠YZnLB</b> | <b>LB</b> |
| VAFTUR         | 156.206       | N4        | TUKDOU         | 156.058       | O50       | PUYTAF         | 155.828       | O7        |
| GANVAV         | 156.204       | O14       | NIDFAI         | 156.044       | N1        | WARCOJ         | 155.828       | O12       |
| HIQREF         | 156.201       | O3        | LOXZED         | 156.044       | O7        | EXIWEP         | 155.827       | Cl3       |
| NETTAK         | 156.199       | S1        | RAFWUS         | 156.04        | O7        | MEHZUU         | 155.821       | N4        |
| QAWLOT         | 156.194       | N4        | AREGAF         | 156.037       | O4        | BEMHEI         | 155.821       | O4A       |
| JANLUF         | 156.194       | O2        | DOLVOP         | 156.029       | O4        | IWOQEQ         | 155.817       | N4        |
| OXPAZN         | 156.191       | O5        | RUPSUS         | 156.025       | O4A       | MALFOU         | 155.812       | O7        |
| LAJBII         | 156.189       | N9        | QARVIP         | 156.023       | N4        | YEQSOF         | 155.811       | N24       |
| MITFEB         | 156.186       | O13       | EQEJEQ         | 156.02        | O3        | ZZZDVY04       | 155.803       | O10       |
| QIDRII         | 156.181       | O6        | LIDFIR         | 156.014       | N2        | TENLUX         | 155.802       | O2        |
| TEYCOS         | 156.173       | Cl7       | AWEYAE         | 156.008       | O3        | AKOFEO         | 155.801       | O7        |
| NAZZOG01       | 156.17        | O6        | ZARYEZ         | 155.997       | O8        | EBALAY         | 155.801       | O18       |
| HORCID         | 156.163       | O9        | YEJNAG         | 155.996       | N1        | QELNOO         | 155.801       | Se5       |
| YOYTUE         | 156.163       | O5        | IHECAB         | 155.996       | O3        | WEYMOE         | 155.796       | N2        |
| OHIMUQ         | 156.159       | N4        | NIDDEK         | 155.988       | O3        | NOPCOK         | 155.785       | O10       |
| BEMHEK         | 156.157       | Cl2       | WALBOC01       | 155.984       | O6        | GAKTES         | 155.781       | O4        |
| LOVSAS         | 156.154       | O20       | QAWLOT         | 155.951       | N8        | CUWMEN01       | 155.772       | O6        |
| XEXVIH         | 156.148       | N3        | YAKCEW         | 155.95        | Cl1       | HAWBEN         | 155.767       | N2        |
| CEYSEF         | 156.145       | O5        | LEXMUY         | 155.946       | N8        | BEQPAQ         | 155.766       | O4        |
| FUPQOW         | 156.144       | O10       | QUCYOD         | 155.945       | N9        | OHIBAL         | 155.763       | N3A       |
| NAZZOG         | 156.138       | O10       | MEJYIN         | 155.943       | O1        | CEAMZN01       | 155.76        | O3        |
| RETJIL         | 156.132       | O2        | KUBNAX         | 155.939       | O10       | BERGOV         | 155.757       | N5        |
| RETJIL01       | 156.132       | O2        | QUFFED         | 155.939       | O3A       | OHIMUQ01       | 155.757       | N2        |
| NALNIZ         | 156.131       | N4        | MAPMOJ         | 155.937       | N2A       | FEXNIH         | 155.757       | S1        |
| JONYIX         | 156.131       | Cl2       | ODUKEH         | 155.932       | O8        | FEDYEU         | 155.755       | O10       |
| QAYGAY         | 156.128       | O2B       | TURHOD         | 155.931       | O7        | MAYNIM         | 155.746       | S1        |
| KILLOI         | 156.127       | O3        | YAKPAD01       | 155.931       | O6        | FODXAA         | 155.743       | O10       |
| PAWDEA         | 156.127       | O10       | QOMFEF         | 155.928       | O53       | QUCYIX         | 155.736       | N2        |
| LAPTIJ         | 156.123       | N4        | GANVID         | 155.927       | O14       | AQERUJ         | 155.724       | Cl8       |
| PENPAB         | 156.122       | O5F       | GASREA         | 155.927       | O3        | HIBHEJ         | 155.708       | Cl1       |
| PAFWEY         | 156.111       | O11       | HOVRAM01       | 155.926       | N3        | GITWOX         | 155.707       | N8        |
| PAFWEY10       | 156.111       | O11       | WIJDAV         | 155.923       | O1        | RUVHOF         | 155.704       | O4        |
| RETDAZ         | 156.111       | O2        | XUGDEK         | 155.92        | N24       | HICLOV         | 155.701       | N5        |
| OFABIG         | 156.11        | N2        | BUNLUT         | 155.915       | O4A       | HEXROV         | 155.696       | O2        |
| OTOZOO         | 156.109       | O1A       | AZOHII         | 155.899       | O8        | COBROC         | 155.695       | N3A       |
| JEBGED         | 155.693       | O14       | LINYIQ         | 155.533       | N1        | EWEDOA         | 155.342       | N3        |
| RICDIR         | 155.69        | N5        | IPAPEU         | 155.533       | O3        | DAPPAM         | 155.342       | O1        |
| YIHHAB         | 155.689       | F3        | YAXNIX         | 155.53        | O4        | MARDAN         | 155.338       | O24       |
| LINYIQ         | 155.686       | N3        | DOHBEI         | 155.527       | O6        | NOHDOG         | 155.338       | O8        |
| CAQGUY         | 155.683       | S1        | ZARYEZ         | 155.527       | O8        | IROTOZ         | 155.326       | O1D       |
| WIJZEV         | 155.679       | N3        | MUVVUW         | 155.524       | F2        | RUSFOC         | 155.324       | N15       |
| REHGAN         | 155.676       | O4        | DAWQIE         | 155.523       | O1C       | FEDYAQ         | 155.322       | O5A       |
| REHGAN01       | 155.668       | O6        | TEVHAG         | 155.521       | N6        | YEFQOR         | 155.312       | F8        |
| DOYRUF02       | 155.667       | O4        | ENEYAA         | 155.521       | O2        | NUDNIL         | 155.31        | N23       |
| WAVDAY         | 155.667       | O6        | ZOVSEI         | 155.52        | N2        | NANZIM         | 155.31        | S4        |
| OMODIF         | 155.663       | N3        | SABGEI         | 155.517       | O3        | DAMSUH         | 155.308       | O2        |
| HIJSOI         | 155.654       | Cl1       | XOPVAC         | 155.515       | Cl5       | YIHHIJ         | 155.307       | F2        |
| YOQYUZ         | 155.653       | O5A       | YAKPAD         | 155.511       | O6        | GIQNUT         | 155.302       | O3        |
| YEQSOF         | 155.649       | N22       | GIZFUT         | 155.507       | Cl3       | VOCNAE         | 155.3         | O4        |
| VOMSEW02       | 155.647       | I2        | MEHZUU         | 155.502       | N3        | FAXZEN         | 155.297       | S1        |
| JEXQEJ         | 155.647       | O7        | JAZKII         | 155.502       | O2C       | FIMWAA         | 155.295       | N1        |
| WABFEL         | 155.644       | Cl1       | QOFKIF         | 155.502       | O11       | YUBZAX         | 155.29        | O6        |
| ZETKOA         | 155.639       | O13       | QEHVUW         | 155.496       | O24       | VUJKIW         | 155.289       | Cl2A      |
| QITTIY         | 155.635       | F4        | OKIJAW         | 155.495       | O9        | YEYVEH         | 155.286       | Cl3       |
| MAZLOO         | 155.63        | O29       | OQITUE         | 155.494       | Cl3       | MARDAN         | 155.283       | O10       |
| CAFHUP         | 155.627       | O14       | RAMDOZ         | 155.493       | N3B       | LOHRAE         | 155.279       | O12       |
| EQOVEL         | 155.614       | O2        | UJAQEB         | 155.49        | F9        | NAKPUM         | 155.274       | Cl1       |

|                |               |           |                |               |           |                |               |           |
|----------------|---------------|-----------|----------------|---------------|-----------|----------------|---------------|-----------|
| BECKEC         | 155.613       | O2        | XUGDEK         | 155.485       | O4        | MCYSZN         | 155.274       | O1A       |
| VOMSEW06       | 155.609       | I3        | UZAFOR         | 155.481       | O11       | HOXMIQ         | 155.268       | O4        |
| <b>Refcode</b> | <b>∟YZnLB</b> | <b>LB</b> | <b>Refcode</b> | <b>∟YZnLB</b> | <b>LB</b> | <b>Refcode</b> | <b>∟YZnLB</b> | <b>LB</b> |
| KEGKEN         | 155.606       | O1        | EYODAZ         | 155.479       | O2B       | XIMWAS         | 155.268       | O1        |
| LARQAA         | 155.606       | O1        | FIDFUU         | 155.474       | O8        | ONOHUV         | 155.267       | S1        |
| ODUPOT         | 155.598       | F27       | WEYCEK         | 155.473       | O6        | XIDSOW         | 155.261       | N4        |
| TEXDEJ         | 155.597       | N4        | JETGAU         | 155.469       | O8        | XITSUR         | 155.258       | N4        |
| NOQCOO         | 155.595       | CI2       | EBIVAO         | 155.464       | CI3A      | GIXDOH         | 155.257       | N1        |
| MARDAN         | 155.59        | N36       | DIWSAG         | 155.453       | N3        | JEXQEJ         | 155.256       | O4        |
| CUMBUI         | 155.589       | O5        | SABGIM         | 155.447       | O3        | ROBCIU         | 155.256       | O29       |
| TALZEM         | 155.585       | O4        | YUDMIV         | 155.444       | N1        | NECZUR         | 155.251       | O3        |
| TEFKEV         | 155.583       | CI2       | MOJKAY         | 155.441       | O20       | TIKXET         | 155.245       | O9        |
| PUDCEY         | 155.575       | N3        | XUXPAI         | 155.436       | O6        | OYOWIL         | 155.244       | O3        |
| AYOCUN         | 155.57        | O3        | XUHMoe         | 155.435       | CI1       | XUXPAI         | 155.243       | O10       |
| LUJKEI         | 155.566       | N6        | XIXPIE         | 155.428       | O19       | XUXQAJ         | 155.235       | F4        |
| XUXPAI         | 155.564       | O8        | MOJKAY         | 155.413       | O69       | GECWIX         | 155.233       | N2        |
| DEPYON         | 155.561       | O6        | NETKIK         | 155.4         | N1        | ASUXOD         | 155.232       | O28       |
| KUBTOR         | 155.558       | O10       | WEBRUT         | 155.397       | N4A       | MALVAZ         | 155.228       | N19       |
| RAMGES         | 155.555       | O6        | HOPMIL         | 155.396       | S3        | UJAPOL         | 155.226       | O15       |
| ZIPCOQ         | 155.554       | N2        | GITWOX         | 155.381       | O13       | DUVHEJ         | 155.224       | O2        |
| NOPCOK         | 155.554       | O11       | ODUSAH         | 155.377       | F8        | HEMWO0         | 155.218       | O2        |
| MUJKEI         | 155.551       | O8        | UKIPAH         | 155.374       | O21       | NOWSID         | 155.206       | CI1       |
| LAFXUP         | 155.546       | S1        | DAFYIW         | 155.37        | N10       | JEYVAO         | 155.203       | O4        |
| PUDCEY         | 155.544       | N13       | NAHHUB         | 155.365       | O29       | QAYLEK         | 155.197       | N7        |
| NETYUI         | 155.541       | O4A       | XANVIR         | 155.36        | O10       | AEZNPB         | 155.19        | CI1       |
| BAXWUW         | 155.539       | O3        | HECHAC         | 155.354       | O1        | XOPVAC         | 155.188       | CI7       |
| PIDMEV         | 155.539       | O7        | AQOHEU         | 155.35        | N3B       | CEQJER         | 155.186       | O4        |
| XUNWIM         | 155.534       | O5        | MULMOX         | 155.349       | N2        | KASVAC         | 155.182       | O1B       |
| LAVWIO         | 155.177       | O7        | EDOVUQ         | 155.012       | O7        | EHEWIY         | 154.844       | O8        |
| DUHHIZ         | 155.168       | O6A       | CUBFAH         | 155.01        | O8        | XAMNIJ         | 154.84        | O5        |
| ADIZAP         | 155.167       | O20       | LOGZAK         | 155.008       | O7        | IWIBOH         | 154.837       | CI3       |
| DUUPER         | 155.159       | O3A       | FACLI02        | 155.006       | N1        | OMUVUO         | 154.835       | O7        |
| VIBJEW         | 155.15        | O12       | HEQQUR         | 155.004       | O3        | TECGUF         | 154.834       | O1        |
| SACWEB         | 155.143       | N2        | DAGYAM         | 155           | O7        | IGAVAN         | 154.825       | O7        |
| IXOQAQ         | 155.142       | N7        | OYOWIL         | 154.985       | N12       | CUYCUW         | 154.823       | N3        |
| SIHJEZ         | 155.137       | CI1       | MATNOL         | 154.984       | O12       | COSBIW         | 154.819       | O6        |
| CEWCAJ         | 155.132       | N1        | VIRLAK         | 154.984       | O4        | NONNEM         | 154.816       | O4        |
| CATVUS01       | 155.131       | O18       | JETWIP         | 154.981       | N1        | HEMWO0         | 154.814       | O1B       |
| AVIMOI         | 155.13        | O18       | WALBOC         | 154.981       | O8        | BEWBAl         | 154.812       | O2        |
| MIHNOH         | 155.122       | O7        | DOLVOP         | 154.979       | S3        | JIDWUR         | 154.809       | N14       |
| DOMFES         | 155.115       | N2A       | ROWBAI         | 154.974       | O2        | EBEZEU         | 154.806       | N6        |
| TAZJAH         | 155.112       | O19       | WENTAN         | 154.974       | O3        | VIXVIJ         | 154.804       | O10       |
| XUCFUX         | 155.108       | O1        | FUZXUW         | 154.973       | F1        | NIXQOB         | 154.799       | N6        |
| TAZJAH         | 155.104       | O18       | NABMAF         | 154.969       | CI4       | NEGJOZ         | 154.792       | N4        |
| CATVUS03       | 155.103       | O18       | RUZVAJ         | 154.965       | O11       | IGAVAN01       | 154.787       | O2        |
| LOSCEC         | 155.102       | O1        | YUVWOB         | 154.953       | CI2       | MIPPIM         | 154.786       | N7        |
| DAPNAL         | 155.094       | O2        | YUZQER         | 154.953       | O1        | MURJIV         | 154.784       | N3        |
| SEGHAN         | 155.089       | N6        | SOPNOB         | 154.952       | CI1       | RUZVIR         | 154.782       | O3        |
| AZOHIJ         | 155.084       | O7        | YUPGUN         | 154.946       | CI2       | WIPSUJ         | 154.777       | O2        |
| CATVUS05       | 155.082       | O18       | KIGBIL         | 154.933       | O3        | KAPBEJ         | 154.773       | N20       |
| QORJIQ         | 155.08        | O5        | WUJREA         | 154.933       | F1        | UJEYEP         | 154.772       | N8        |
| AVIMOI         | 155.079       | O6        | ERIRAZ         | 154.932       | N4        | QIJPUU         | 154.77        | N2        |
| SENJEB         | 155.079       | O4C       | TEFKEV         | 154.914       | CI1       | CAYWEG         | 154.769       | O21       |
| KAKSOI         | 155.078       | CI1       | AZIXUD         | 154.907       | O13       | DOQTIP         | 154.766       | O5        |
| IQIBAN         | 155.075       | O20       | CAFHEZ         | 154.903       | CI6       | DADXUD         | 154.765       | O11       |
| QUFGII         | 155.074       | O5        | FOMCUH         | 154.902       | N2        | TAHFOY         | 154.762       | N1        |
| IHIJUH         | 155.064       | F4        | SEWVEZ         | 154.899       | O10B      | IJUZAQ         | 154.754       | O1B       |
| CATVUS02       | 155.061       | O18       | FAKHOQ         | 154.892       | O11       | CAYWIK         | 154.751       | O5        |
| EQOGIB         | 155.055       | O5        | VIQMEO         | 154.892       | O6        | ZIZMEC         | 154.75        | O4        |
| CITTUW         | 155.054       | O2A       | EFEBEA         | 154.889       | N3        | DEHFUR01       | 154.749       | O5E       |

|                |               |           |                |               |           |                |               |           |
|----------------|---------------|-----------|----------------|---------------|-----------|----------------|---------------|-----------|
| FACLI          | 155.053       | N1        | LUKRIT01       | 154.889       | O3        | PURLUM         | 154.746       | F2        |
| CATVUS04       | 155.046       | O18       | OXUZAK         | 154.887       | O1        | LAPZUB         | 154.738       | N12       |
| <b>Refcode</b> | <b>∠YZnLB</b> | <b>LB</b> | <b>Refcode</b> | <b>∠YZnLB</b> | <b>LB</b> | <b>Refcode</b> | <b>∠YZnLB</b> | <b>LB</b> |
| OCIFUE         | 155.044       | N5        | LUKRIT         | 154.885       | O3        | QIFKUP         | 154.737       | O6B       |
| FEBYIW         | 155.044       | O27       | WENTUE         | 154.884       | O1        | KUBZIR         | 154.736       | N3        |
| MIMZEP         | 155.043       | O6B       | QIPLAE         | 154.883       | O2        | SEHLAU         | 154.734       | CI2       |
| LIRNOR         | 155.042       | O8        | NASJOI         | 154.877       | N5        | KUJWAO         | 154.729       | CI2       |
| FEBYIW         | 155.037       | O5        | FODZAA         | 154.877       | O3        | XEYBEL         | 154.726       | O4        |
| AXOTEP         | 155.035       | O2        | KEGKEN         | 154.871       | N1        | IGAVAN01       | 154.721       | O8        |
| EXIWIT         | 155.034       | CI3       | UHARIE         | 154.869       | CI2       | FAHJEF         | 154.716       | O17       |
| WIJDAV         | 155.027       | O12       | GAWTEF         | 154.869       | O9        | TEDVON         | 154.71        | N4        |
| PUDBUN         | 155.025       | N20       | MUHHUT         | 154.865       | F10       | QUCYIX         | 154.702       | N19       |
| FOSQOV         | 155.024       | O14       | OYOWEH         | 154.863       | N7        | GABYEO         | 154.689       | O7        |
| YUQQEI         | 155.023       | O2        | GICMAI         | 154.863       | O28       | NINSOW         | 154.689       | O3B       |
| WUFBUV         | 155.021       | O4        | KUHWIU         | 154.857       | N10       | HOKTUY         | 154.687       | S4        |
| CERGA          | 155.015       | O4        | BEFHUS         | 154.85        | N4        | YUTTEN         | 154.683       | O4        |
| CAWLIY         | 155.013       | O2A       | XOJWUP         | 154.849       | N2        | MARDAN         | 154.68        | O16       |
| MATVAG         | 155.013       | O4        | TIQWOJ         | 154.844       | N2        | WALCIX         | 154.677       | N7E       |
| DEBSUZ         | 154.677       | As5       | OYOWEH         | 154.537       | N12       | FAVRAX         | 154.377       | O3        |
| WARCOJ         | 154.675       | N2        | MUJKEI         | 154.536       | O10       | QOMFEF         | 154.377       | O46       |
| ASUXOD         | 154.674       | O30       | JILREF         | 154.535       | N1        | NESQOT         | 154.37        | N3        |
| XUXPAI         | 154.672       | O10       | FONNUR         | 154.531       | O11       | RAMROP         | 154.37        | O5        |
| ZERVOJ         | 154.672       | O6A       | QELKUQ         | 154.524       | N4        | IDIFIN         | 154.368       | O9        |
| POLDOL         | 154.667       | O4        | FEDYEU         | 154.518       | O7        | JIXLUY         | 154.367       | O1        |
| ZZZDVY02       | 154.665       | N2F       | CORLOM         | 154.514       | O1        | UNAGUN         | 154.362       | O13       |
| PIBCEL         | 154.661       | N2        | ZIXLOK         | 154.513       | N1        | ZAPXUN         | 154.361       | F10       |
| NAHHAH         | 154.656       | CI1       | LUFXUI         | 154.51        | O4        | MARTEI         | 154.359       | N6        |
| GAHXEU         | 154.656       | O12       | QUHVUM         | 154.509       | F26       | GUCHAN         | 154.357       | O2        |
| HORCID         | 154.656       | O10       | LICHOU         | 154.506       | O8        | GUCHAN01       | 154.357       | O1        |
| POSBEG         | 154.655       | O7        | XAGNEZ         | 154.506       | O21       | VUYNAF         | 154.356       | N6        |
| DAYPOK         | 154.654       | O3        | KUBTEH         | 154.5         | O19       | YIJDAY         | 154.356       | O4A       |
| KOMRAH         | 154.649       | O18       | XUXQEN         | 154.487       | O11       | OCADAY         | 154.342       | O2        |
| CATVUS         | 154.648       | O18       | IWOPOZ         | 154.486       | N2        | COWCAU         | 154.341       | O10       |
| IWEMUT         | 154.647       | O6        | JONYET         | 154.485       | CI1       | QUMJOZ         | 154.34        | N8        |
| ZZZDVY03       | 154.644       | N1A       | EMEZOM         | 154.482       | O12       | LEWSIT         | 154.336       | N4        |
| HECHAC         | 154.643       | O8        | FUJBIX         | 154.474       | O6        | IGAVAN         | 154.334       | O1        |
| BEMHAG         | 154.64        | CI2       | VIXVIJ         | 154.473       | O6        | REFDEN         | 154.334       | O11       |
| EKOZUB         | 154.639       | O5        | CAGLAB         | 154.472       | N14       | EBUBEL01       | 154.329       | O6        |
| LIGVAY         | 154.639       | O10       | TUKFAI         | 154.471       | O43       | QIQDOL         | 154.324       | O1        |
| QUZWEO         | 154.637       | N4        | GIXPIQ         | 154.462       | N25       | GUPWUK         | 154.321       | S6        |
| ZUFQEY         | 154.637       | O10       | MIVDIF         | 154.456       | O6        | IJUZAQ         | 154.319       | N2B       |
| MOJKAY         | 154.628       | O90       | MIBHIQ         | 154.453       | N7        | SADFAH         | 154.316       | CI2       |
| IJURAI         | 154.611       | O2        | UVUFAU         | 154.449       | O2        | POWFUD         | 154.315       | CI2D      |
| BOPHAR         | 154.604       | O5A       | IRAFEN         | 154.44        | N8        | WEWKEO         | 154.311       | F1        |
| FIZWAO         | 154.603       | O5        | WUJRUP         | 154.437       | N7        | TILVAM         | 154.309       | N5        |
| DAJLEI         | 154.602       | O2        | OYOWEH         | 154.434       | O1        | MUGYUJ         | 154.302       | F3        |
| FAXCUF         | 154.599       | O8        | ATAHAE         | 154.433       | O4B       | LASMEZ         | 154.296       | O21       |
| QARVIP         | 154.591       | N10       | MAJDUY         | 154.428       | O1        | UNAGOH         | 154.287       | O13       |
| XUCVOG         | 154.587       | O5        | KUBNAX         | 154.426       | O4        | KIJNUP         | 154.286       | O12       |
| MUGBOI         | 154.585       | N2        | CIMDAF         | 154.422       | O9        | JOYZEE         | 154.285       | O6        |
| DIYXEO         | 154.583       | N3        | LERVOV         | 154.418       | O4        | IXOFUY         | 154.275       | O7        |
| UIIRUB         | 154.583       | O2        | VOCNAE         | 154.418       | O12       | BAVVUS         | 154.272       | O8        |
| CEAMZN         | 154.58        | O1        | NADCUS         | 154.417       | O7        | OXPAZN         | 154.268       | CI2       |
| MUMTOD         | 154.578       | O6        | DOYRUF01       | 154.416       | O4        | TENLUX         | 154.268       | O1        |
| ZATCEG         | 154.577       | S1        | EYEHEW         | 154.414       | S1        | YOQYIN         | 154.264       | N2        |
| QAYLEK         | 154.573       | O2        | WEYFIR         | 154.412       | O7        | TEXRUM         | 154.25        | CI1       |
| OYAPOV         | 154.572       | N1        | OYOWIL         | 154.411       | N4        | DEFHUT         | 154.229       | O8        |
| PUPMOD         | 154.566       | O5A       | AJOWON         | 154.411       | O10       | LOYMET         | 154.221       | N1        |
| HOKTUY         | 154.56        | S2        | EWUXOL         | 154.409       | CI1F      | NAHHOV         | 154.218       | CI3       |
| LAGVEX         | 154.559       | O5        | HOLJAV         | 154.409       | F5        | ETUXAT         | 154.215       | O5        |

|                |               |           |                |               |           |                |               |           |
|----------------|---------------|-----------|----------------|---------------|-----------|----------------|---------------|-----------|
| DASPUJ         | 154.557       | O9        | AMIMIU         | 154.402       | O3        | LIMNOL         | 154.213       | N1        |
| SERIZN10       | 154.556       | O5        | LAXSAH         | 154.402       | O9        | MUYCOB         | 154.213       | O2A       |
| <b>Refcode</b> | <b>∠YZnLB</b> | <b>LB</b> | <b>Refcode</b> | <b>∠YZnLB</b> | <b>LB</b> | <b>Refcode</b> | <b>∠YZnLB</b> | <b>LB</b> |
| ZINLUG         | 154.556       | O14       | BOCRIX         | 154.395       | O7        | FAXZEN         | 154.201       | S2        |
| EWOJAC         | 154.552       | O12       | SOBNIJ         | 154.395       | O7        | WALBOC02       | 154.199       | N7E       |
| FIPRUR         | 154.55        | N3        | WIJDAV         | 154.393       | O20       | MOJKAY         | 154.193       | O33       |
| CIHWEX         | 154.548       | O5        | WENTAN01       | 154.388       | O10       | VIRJEN         | 154.187       | F8        |
| TIRHUZ         | 154.541       | O3        | QUSVEF         | 154.383       | O4        | GASRIE         | 154.186       | O3        |
| PAKVOM         | 154.185       | CI2       | KODJIY         | 154.02        | N7        | VONTOK         | 153.858       | S3        |
| EQECOV         | 154.18        | N4        | VIRXAX         | 154.012       | N3A       | GIZFUT         | 153.856       | O19       |
| LUVBAH         | 154.173       | O2        | MUMTOD         | 154.012       | O7        | LELDEM         | 153.856       | O5        |
| ETUXAT         | 154.169       | O7        | SOKZOJ         | 154.011       | O13       | PELXUA         | 153.855       | N8        |
| PAWDAW         | 154.166       | O10       | SOXQEE         | 154.011       | O3A       | QARSIL01       | 153.855       | O2        |
| OYEXOI         | 154.165       | O21       | IDEFII         | 154.009       | O2        | XIDSOW         | 153.846       | N10       |
| EHOPAV         | 154.16        | O6        | IGOPAW         | 154.009       | O2        | NIQREK         | 153.84        | O4        |
| FIFWIB01       | 154.156       | N3        | VIXVOP02       | 154.009       | O1A       | TUDSET         | 153.839       | O6        |
| MIKCEP         | 154.156       | O12       | AHOMUH         | 153.984       | N1        | OXOGUG         | 153.837       | Se4       |
| UGEZOX         | 154.148       | O2        | ISOKOQ         | 153.979       | O4        | GUQLUA         | 153.833       | O57       |
| GOSBEX         | 154.144       | N2        | QAKMAQ         | 153.979       | O2        | GIXDOH         | 153.832       | O1        |
| WALCET         | 154.144       | N7E       | XASCUQ         | 153.979       | O2        | POCCAN         | 153.827       | F1        |
| YEQSOE         | 154.142       | N5        | CAMYEW         | 153.978       | N2        | NETYUI         | 153.826       | O5A       |
| ISODOJ         | 154.136       | O4        | YOLYIK         | 153.978       | O9        | NAQKOH         | 153.825       | N3        |
| WUPTAE         | 154.131       | O17       | MIKBOY         | 153.976       | O11       | GASSAX         | 153.822       | O3        |
| ZURXUF         | 154.131       | O4        | ZETLAN         | 153.975       | O13       | DAPNAL         | 153.821       | CI2       |
| NEPMIF         | 154.128       | O4        | UJEYIT         | 153.969       | O5        | IFAHEC         | 153.817       | O35       |
| MOJKAY         | 154.124       | O82       | MARDAN         | 153.968       | O28       | BOCRIX         | 153.814       | O7        |
| SINWUI         | 154.12        | CI2       | AFIQUB         | 153.966       | O8        | SEZMIW         | 153.814       | O4        |
| VIBJEW         | 154.119       | O5        | YIMQES         | 153.963       | O7A       | TUJWIH         | 153.802       | O4        |
| MUVVUW         | 154.117       | O10       | AFUJAM         | 153.962       | O16       | QANTIJ         | 153.799       | O1        |
| XUGDEK         | 154.113       | N22       | SOQDAE         | 153.958       | O8        | DEHFIH         | 153.789       | O10       |
| MAKCEI         | 154.108       | O7        | WEWKEO         | 153.958       | F6        | IZIPAI         | 153.779       | O2        |
| QICJEU         | 154.107       | N2        | NILRAF         | 153.95        | N2C       | AHOFUZ         | 153.771       | O5        |
| WERJOT         | 154.107       | O13       | ZOJXIH         | 153.948       | N10       | TUKDUA         | 153.77        | O43       |
| NASJUO         | 154.106       | N1        | UTIPUK01       | 153.946       | O4        | DEHFUR01       | 153.769       | O2        |
| OYEXIC         | 154.104       | O19       | CUHKUN         | 153.943       | O6        | KASVAC         | 153.768       | N1B       |
| XULZIQ         | 154.097       | O10       | DEHFUR         | 153.942       | O9        | KITZOD         | 153.763       | O4        |
| YOHZOL         | 154.095       | O5        | EFEBEA         | 153.941       | N2        | QAMKOE         | 153.76        | N9        |
| LAPZUB         | 154.094       | N17       | OHUQAJ         | 153.939       | O21       | TIQBEB         | 153.757       | O15       |
| BATXIG         | 154.094       | O12       | KIFVIG         | 153.933       | N1        | EBUBEL01       | 153.75        | O4        |
| YUDMIV         | 154.084       | N3        | RUQSOL         | 153.932       | CI2       | ZAWHIQ         | 153.747       | O12       |
| RUZTOV         | 154.079       | O3        | VIXVOP03       | 153.932       | O1A       | MUPHOX         | 153.745       | O6        |
| HERTAA         | 154.072       | N8A       | HOXMIQ         | 153.931       | O6        | SITVUN         | 153.743       | O1        |
| DEBSUZ         | 154.072       | O11       | JENWIL         | 153.926       | O5        | CAPKOW         | 153.74        | F2        |
| MOJKAY         | 154.072       | O15       | VUDWUP         | 153.922       | O1B       | SEHFOC         | 153.739       | O6        |
| SOPWIF         | 154.071       | O4        | VIXTOM         | 153.915       | O2A       | ZUSJII         | 153.735       | N1        |
| RINSIT         | 154.066       | O3        | XIJDAX         | 153.907       | N3        | ASIYUZ         | 153.734       | O7        |
| GOBJAK         | 154.056       | O9        | OZUNEF         | 153.901       | O5C       | DOYRUF         | 153.728       | O4        |
| TAHFIS         | 154.051       | N3        | ZIJJEK         | 153.899       | O8        | MAPNAW         | 153.721       | N4A       |
| CEPJUE         | 154.048       | O2        | RUPLEV         | 153.898       | F28       | KOHBEP         | 153.72        | O7        |
| CESKUK         | 154.046       | O8        | XALMAC         | 153.887       | N8        | GEYRIO         | 153.718       | O5        |
| VIXVOP01       | 154.046       | O1A       | SOPLOA         | 153.886       | N3        | FUPQOW         | 153.716       | O6        |
| SARXAO         | 154.044       | O3C       | TUKFIQ         | 153.878       | O43       | LADTAO         | 153.714       | O9        |
| VELQUC         | 154.043       | O6        | KOMRAH         | 153.873       | O18       | TEXDEJ         | 153.712       | N5        |
| MAYNEI         | 154.043       | S1        | VABQIC         | 153.868       | O5        | HYZCZN         | 153.711       | N4        |
| CIJXID         | 154.041       | O4        | VIXVOP04       | 153.863       | O1A       | REGREE         | 153.711       | O10       |
| RUTQUS         | 154.04        | CI2       | QUJCUV         | 153.862       | CI4       | ITUBOP         | 153.71        | CI1       |
| MEJYIN         | 154.028       | O2        | BUJBUG         | 153.858       | O9        | KUBTIL         | 153.704       | O16       |
| IRINON         | 153.691       | CI4       | LETRIP         | 153.52        | O2        | UVIKES         | 153.353       | O5        |
| DUBMEV         | 153.688       | O5        | WURQUW         | 153.519       | CI1       | JACKIL         | 153.35        | CI1       |
| FUFVIM01       | 153.683       | S1        | PIDMEV01       | 153.514       | O5D       | BEJMEI         | 153.342       | CI1       |

|                |               |           |                |               |           |                |               |           |
|----------------|---------------|-----------|----------------|---------------|-----------|----------------|---------------|-----------|
| JUCROO         | 153.68        | N5        | RUSFOC         | 153.512       | N2        | TUKDOU         | 153.341       | O43       |
| YIFYIY01       | 153.678       | N2        | DUQZOH         | 153.51        | O2        | RUZQAE         | 153.327       | O6        |
| <b>Refcode</b> | <b>∠YZnLB</b> | <b>LB</b> | <b>Refcode</b> | <b>∠YZnLB</b> | <b>LB</b> | <b>Refcode</b> | <b>∠YZnLB</b> | <b>LB</b> |
| TENZET         | 153.676       | F7        | KIMFIZ         | 153.509       | N4N       | XUWGAY         | 153.326       | N2        |
| BUBSOJ         | 153.668       | N1        | LUNXIC         | 153.509       | N3        | BACMOJ         | 153.323       | N1        |
| ADIZAP         | 153.661       | O4        | DAYZEK         | 153.507       | O10       | ZIKQOD         | 153.323       | CI2       |
| LAVWIO         | 153.661       | O6        | FASQUN         | 153.5         | O5        | WEYMOE         | 153.323       | O5        |
| GUVFUY         | 153.66        | CI1       | ACORAN         | 153.499       | O6        | JEQSIL         | 153.322       | N4        |
| WARCOJ         | 153.66        | O10       | YECTEH         | 153.494       | S1        | KEBGIK         | 153.321       | O12       |
| VUMVEH         | 153.659       | N4        | SIPJIL         | 153.493       | O5        | REHGAN         | 153.317       | O8        |
| OHALAL         | 153.657       | N4D       | EFOXAB         | 153.488       | N1        | WODGED         | 153.316       | CI1       |
| KUBVOU         | 153.654       | O5        | CAYWIK         | 153.479       | O10       | SOQDAE         | 153.315       | O7        |
| YUPGUN         | 153.654       | O2        | LODQEA         | 153.472       | N2A       | HAGQUB         | 153.312       | O1A       |
| KIFVOM         | 153.65        | N12       | LUMLUC         | 153.472       | O4        | LUPPEU         | 153.31        | O5A       |
| VIXTOM         | 153.649       | O3        | SUWCEU         | 153.472       | O7        | NANZIM         | 153.304       | S6        |
| AQIFOW         | 153.648       | O10       | UXAMEN02       | 153.469       | O6        | WAXNUE         | 153.303       | N3        |
| VAJSUW         | 153.643       | O4        | OYAPUB         | 153.468       | O6        | KILLOI         | 153.3         | O6        |
| XUXQEN         | 153.642       | O1        | EFOXEF         | 153.467       | O6        | ULEPOS         | 153.3         | O2        |
| YEFVAI         | 153.641       | O10       | PENPAB         | 153.466       | N2        | FOWQEQ         | 153.292       | O3        |
| LIQHUQ         | 153.639       | CI1       | GOBJAK         | 153.461       | O5        | QETTOZ         | 153.289       | N3        |
| YUXRAM         | 153.636       | O2        | BOCRIX         | 153.459       | O8        | GOZGOT         | 153.285       | N3        |
| YUZQIV         | 153.635       | O2        | KAYBEU         | 153.454       | CI15      | DEKGAD         | 153.285       | O15       |
| OLELID         | 153.628       | N2        | BEMHAG         | 153.45        | O2        | LISXEU         | 153.281       | O6A       |
| YEFVAI         | 153.628       | O4        | ZAWTOI         | 153.445       | O4A       | QEKNAZ         | 153.281       | O3        |
| XUGREZ         | 153.616       | N6        | KEHGUD         | 153.444       | F3        | TAVDUS         | 153.279       | N6        |
| XALXOX         | 153.616       | O2        | NOPCOK         | 153.44        | O10       | YIFYIY         | 153.276       | N2        |
| MOJKAY         | 153.615       | O18       | DOPGUL         | 153.439       | CI5       | ATEMET         | 153.275       | CI1A      |
| XUGDEK         | 153.604       | N5        | ZARYEZ         | 153.432       | O5        | REHGAN         | 153.274       | O3        |
| XOHNEO         | 153.603       | O9A       | YUBBAY         | 153.431       | O19       | UHOQEN         | 153.274       | O6        |
| KEKXAB         | 153.598       | O3        | FIXPOT         | 153.429       | N2        | FAKJIM         | 153.271       | O6        |
| YIMKEM         | 153.598       | O7        | XUWGAY         | 153.422       | N4        | VOFNIP         | 153.271       | O1B       |
| EZEJOL         | 153.597       | O13       | RUZQIM         | 153.42        | N1        | EBUBOV01       | 153.27        | O4C       |
| JENWIL         | 153.596       | O7        | RERKUW         | 153.418       | O18       | LETRIP         | 153.27        | F18       |
| WIHMIK         | 153.591       | S3        | XUHMoe         | 153.417       | CI1       | CUWMEN         | 153.267       | O2        |
| CUJFOF         | 153.587       | O3        | ADUGAK         | 153.413       | CI1       | QUTHOE         | 153.265       | O3        |
| SAVLIK01       | 153.586       | N3        | MUDKOM         | 153.409       | O5        | PIDTOO         | 153.262       | O6        |
| EYEHEW         | 153.581       | S1        | TUMGAM         | 153.397       | N1        | VUWCIA         | 153.262       | O2        |
| RUVHIA         | 153.58        | CI1       | WOLKUF         | 153.395       | O1        | UWIQEX         | 153.26        | O4        |
| NUMTAS         | 153.578       | N1        | EDOZAY         | 153.393       | CI16      | DOMHOD         | 153.253       | O1        |
| GIZTEQ         | 153.558       | O4B       | HAWFEU         | 153.392       | O36       | KIWZOJ         | 153.248       | O8        |
| NOBHIX         | 153.554       | O12       | CUWMEN01       | 153.39        | O3        | YISPAV         | 153.247       | O7        |
| TUFHAE         | 153.546       | O7        | HAGQOV         | 153.385       | O4        | HUQWOG         | 153.246       | O24       |
| EMOQIH         | 153.545       | O17       | NIQLAC         | 153.385       | O17       | SEKNAA         | 153.234       | O5        |
| MOBFOB         | 153.537       | O6        | CEAMZN         | 153.38        | O2        | DEHFUR         | 153.231       | O18       |
| VIXVOP10       | 153.532       | O4A       | ZZZDVY02       | 153.372       | N1F       | DAWQOK         | 153.23        | O6        |
| VIMNAJ         | 153.526       | O5        | ISODUP         | 153.371       | O9        | ASUXOD         | 153.224       | O35       |
| SAVLIK         | 153.52        | N4        | VIVNOF         | 153.364       | O11       | JAQRIG         | 153.212       | N3A       |
| ADIZAP         | 153.208       | O22       | TUXMIL         | 153.027       | O9        | SUWZOC         | 152.823       | O40       |
| NOZLIX         | 153.207       | O4        | YOXMIK         | 153.019       | CI3       | FEYDOD         | 152.822       | N3        |
| WIRHUD         | 153.201       | O9        | UMAMED         | 153.011       | O1A       | LAWHAV         | 152.819       | O16C      |
| ZUSBIA         | 153.196       | N2C       | TILQAH         | 153.009       | CI1       | QIYROH         | 152.815       | N3        |
| UQEDIE         | 153.192       | O4D       | NIDMOD         | 153.008       | O9        | LAKPIY         | 152.813       | CI2       |
| WARCAV         | 153.191       | O2        | LILVAD         | 153.005       | O4        | RUGYIE         | 152.813       | O25       |
| KAXHIE         | 153.19        | N7        | PABJAE         | 153.004       | CI2       | NEKPOK         | 152.81        | O4        |
| BERGOV         | 153.188       | N2        | RESSUH         | 153.004       | CI4       | WUHBOS         | 152.803       | CI1       |
| REHGAN01       | 153.178       | O1        | CEAMZN01       | 152.997       | O1        | GURLUB         | 152.801       | O3        |
| LENSON         | 153.172       | O5        | FUFVIM         | 152.993       | S1        | KAPBEJ         | 152.799       | N20       |
| WOHQIV         | 153.166       | O5        | MAKHAH         | 152.992       | N3        | XUXQEN         | 152.799       | O9        |
| JIDWUR         | 153.161       | N12       | VAJHIA         | 152.992       | O4F       | TIRHEJ         | 152.793       | O8        |
| KAPGUH         | 153.159       | S4        | XUGREZ         | 152.991       | N3        | FURDEB         | 152.792       | N2        |

|                |               |           |                |               |           |                |               |           |
|----------------|---------------|-----------|----------------|---------------|-----------|----------------|---------------|-----------|
| RESSUH         | 153.156       | O15       | GUWXIG         | 152.99        | O1        | RUWMUT         | 152.787       | F4        |
| JOXNIT01       | 153.154       | N1        | SIZPOJ         | 152.984       | N3        | XAXZIG         | 152.775       | O9        |
| <b>Refcode</b> | <b>∠YZnLB</b> | <b>LB</b> | <b>Refcode</b> | <b>∠YZnLB</b> | <b>LB</b> | <b>Refcode</b> | <b>∠YZnLB</b> | <b>LB</b> |
| VENMIL         | 153.153       | CI1       | TAYBII         | 152.981       | O5        | ICUFOC         | 152.771       | O1        |
| OCIFUE         | 153.148       | N4        | KOKBAO         | 152.967       | O1        | WAJGAQ         | 152.76        | O7        |
| XIIKAC         | 153.143       | O5        | XUQZAK         | 152.966       | O3        | SASGEY         | 152.756       | O6        |
| NUMJUD         | 153.136       | O5        | LECMOW         | 152.961       | CI1       | EFOXAB         | 152.751       | O5        |
| FORWOA         | 153.13        | O2        | MAHWIC         | 152.959       | N3        | FODNAQ         | 152.748       | O11       |
| BEJMEI01       | 153.129       | CI2       | EMOQIH         | 152.957       | N9        | ZIJJEK         | 152.748       | O8        |
| CEXRII         | 153.126       | CI1       | GICLUB         | 152.953       | O29       | VUDQET01       | 152.746       | O2B       |
| RAJSAA         | 153.125       | O10       | LAPYOU         | 152.951       | N9A       | CEAMZN01       | 152.745       | O2        |
| YEYVEH         | 153.125       | O7        | EHIZAY         | 152.946       | F14       | VIZSEE         | 152.742       | O7        |
| ZOGNER         | 153.123       | O2        | LEZNIP         | 152.944       | F3        | PETFON         | 152.74        | O11       |
| EBUBOV         | 153.116       | O4C       | IJUXUG01       | 152.94        | O4        | FUJBOD         | 152.739       | O8        |
| PIDMEV         | 153.113       | O5D       | KEHNIW         | 152.939       | O24       | JARKOG         | 152.731       | N3C       |
| GUQLUA         | 153.107       | O65       | KANNUK         | 152.937       | S3        | NOHFAU         | 152.727       | O6        |
| IJEXOL         | 153.107       | O1E       | QENFAR         | 152.936       | O9        | HOTNIQ         | 152.726       | O16       |
| WARCOJ         | 153.106       | O1        | MAHWIC01       | 152.925       | N2        | JENBIQ         | 152.723       | N5        |
| REHGAN01       | 153.103       | O3        | UVIKES         | 152.924       | N5        | TOHYUM01       | 152.721       | O17       |
| YUZQER         | 153.103       | O2        | YEHYOB         | 152.924       | O5        | DAYPUQ         | 152.718       | O6        |
| WUCFEI         | 153.1         | O9        | BOVNIK         | 152.922       | O6        | CIVQEG         | 152.715       | N6        |
| IXOFUY         | 153.089       | O4        | WIJDAV         | 152.922       | O14       | OHUQAJ         | 152.715       | O1        |
| JEPVIM         | 153.088       | N9        | MAZLOO         | 152.921       | O23       | OJUHUV         | 152.714       | O2        |
| MARDAN         | 153.087       | O2        | TILSUG         | 152.921       | O2        | FAZCUH         | 152.713       | O11       |
| DUCJOB01       | 153.086       | O5        | JENBIQ         | 152.912       | N8        | DUBMIZ         | 152.708       | O4        |
| ASUXOD         | 153.077       | O36       | IJUXUG         | 152.9         | O4        | DORFUN         | 152.704       | O2A       |
| XEYSOM         | 153.077       | O8        | LECTUK         | 152.882       | O1        | ZOGNER         | 152.703       | O5        |
| NUWRON         | 153.076       | O3        | WUDMAJ         | 152.881       | O1        | NOPCOK         | 152.694       | O9        |
| NEPPAZ         | 153.069       | O12       | HUZDUD         | 152.879       | O2        | XULZIQ         | 152.688       | O24       |
| NOLYIW         | 153.068       | O2F       | QELNOO         | 152.879       | Se5       | CAKYIX         | 152.687       | N1        |
| JISNEF         | 153.061       | O3        | CINQAT         | 152.857       | N3        | EVUJUD         | 152.687       | N1A       |
| KEHLAO         | 153.059       | O3        | ETUCOM         | 152.845       | O1        | OQOFUW         | 152.686       | O5        |
| EYACUC         | 153.054       | O7        | VAJHIA         | 152.837       | O5C       | HEXGUO         | 152.684       | O11       |
| FAKTIY         | 153.043       | O4        | OQOFIK         | 152.835       | N5        | ZASVUN         | 152.681       | N7        |
| ICUGIX         | 153.043       | O5        | HIYNIN         | 152.833       | N1        | FIQDAN         | 152.679       | N1        |
| WALCIX         | 153.034       | O3        | NUWXAF         | 152.833       | N8        | HAGQUB         | 152.679       | O2A       |
| USITUM         | 153.033       | O3A       | EMOQIH         | 152.83        | O14       | COVQIQ         | 152.675       | O23       |
| CEAMZN         | 152.671       | O3        | ROLNEM         | 152.499       | O2        | VEVVID         | 152.344       | O4        |
| UGEZIR         | 152.669       | O2        | NIKLUP         | 152.494       | N11       | KEDQOB         | 152.336       | O6        |
| BIZFUL         | 152.667       | O5        | BETTEC         | 152.492       | O1        | QEHVUW         | 152.334       | O11       |
| VUDPUI         | 152.661       | O2B       | FUPQOW         | 152.484       | O4        | WAZBAC         | 152.329       | CI1       |
| XEBSIG         | 152.661       | O3        | KAMTID         | 152.481       | O1        | WUYHUU         | 152.329       | O5        |
| YEYVEH         | 152.66        | CI4       | TEFQIE         | 152.48        | N4        | FUBTIF         | 152.327       | O1        |
| ZZZDVY02       | 152.653       | O1F       | IHITUR         | 152.476       | O4        | VEHLUQ         | 152.327       | O70       |
| QUBLAB         | 152.648       | O9        | LIDWAA         | 152.475       | O5        | CABPEE         | 152.323       | O11       |
| QANZEL         | 152.644       | O1        | ZAQVOG         | 152.474       | O10       | JIDWUR         | 152.322       | N8        |
| VUDPIW         | 152.64        | O2B       | DAMTEQ         | 152.47        | N1        | QAKLEU         | 152.318       | O5        |
| BAMZAR         | 152.638       | O4        | UQEDIE         | 152.469       | O4D       | ASUXUJ         | 152.316       | O2        |
| BADRUU         | 152.637       | CI2       | JABDID         | 152.467       | CI1       | XIMWAS         | 152.313       | O7B       |
| DATVUQ         | 152.635       | O12       | YEFQOR         | 152.464       | O8        | MUVVUW         | 152.307       | O4        |
| URIQES         | 152.633       | CI1       | DUDLUL         | 152.457       | CI5       | DUCHUF         | 152.306       | O11       |
| VUDQET         | 152.63        | O2B       | XANVIR         | 152.454       | O5        | NIXKEM         | 152.304       | O8D       |
| TATZOG         | 152.627       | S1        | RETDAZ         | 152.451       | O6B       | OXUYOX         | 152.3         | O8        |
| LAYTAJ         | 152.625       | O2        | ATULIM         | 152.448       | O5        | TUFJAG         | 152.296       | O1        |
| VUDPOC         | 152.623       | O2B       | VONCOR         | 152.448       | O4        | QIDRAA         | 152.292       | O3        |
| VUDPUI01       | 152.621       | O2B       | BAYVAB         | 152.446       | CI10      | KUBTIL         | 152.279       | O12       |
| SIKBEV         | 152.62        | O9        | GUQTOB         | 152.431       | N1A       | XIDSOW         | 152.277       | N11       |
| VUJTOK         | 152.617       | N3        | EMATAQ         | 152.429       | O11       | DUCJUH         | 152.277       | O10       |
| DEDYES         | 152.616       | O2        | WAQFIG         | 152.426       | O13       | BEYLAW         | 152.273       | N2D       |
| DEWVOR         | 152.613       | CI3       | ISOKOQ         | 152.425       | N5        | LABQIQ         | 152.267       | O10       |



|                |               |           |                |               |           |                |               |           |
|----------------|---------------|-----------|----------------|---------------|-----------|----------------|---------------|-----------|
| XAGQAZ         | 152.609       | O4        | CEBCUJ         | 152.42        | O4        | IFIXAW         | 152.26        | O18       |
| CEXTEI         | 152.605       | N8        | VEKWUE         | 152.42        | O8        | JIDWUR         | 152.249       | N2        |
| <b>Refcode</b> | <b>∠YZnLB</b> | <b>LB</b> | <b>Refcode</b> | <b>∠YZnLB</b> | <b>LB</b> | <b>Refcode</b> | <b>∠YZnLB</b> | <b>LB</b> |
| EDONOE         | 152.603       | O6        | VEGLOK         | 152.413       | O13       | LISXEU         | 152.249       | S1A       |
| ULEXER         | 152.599       | O4        | SACYOO         | 152.411       | CI10      | YELHAB         | 152.247       | O3        |
| FEXBOD         | 152.596       | O8        | VUPPUS         | 152.404       | N3        | MIXLAI         | 152.246       | O5        |
| GAPDAE         | 152.593       | O13       | MOJKAY         | 152.4         | O76       | GIZGAA         | 152.242       | O15       |
| QJIPUU         | 152.589       | N1        | AQEYOK         | 152.393       | O10       | QARVIP         | 152.242       | O8        |
| BAVVUS         | 152.588       | O2        | EBEZUK         | 152.39        | N4        | JURQAQ         | 152.238       | O9        |
| VUDQOD         | 152.587       | O1B       | YEXNOH         | 152.388       | N3        | MUVVUW         | 152.238       | O7        |
| TAHFOY         | 152.583       | N3        | NUHHIK         | 152.387       | O4        | REXPES         | 152.236       | O2        |
| WALCET         | 152.58        | O4        | ELAMUC         | 152.386       | O4        | CIHWEX         | 152.232       | O5        |
| JIQPAA         | 152.574       | O1        | MATVAG         | 152.385       | O3        | POQSUJ         | 152.228       | CI5       |
| VUDXAW         | 152.572       | O2B       | WANFOI         | 152.379       | N1A       | BIBGOJ         | 152.227       | O3        |
| YEJMOT         | 152.563       | N3        | DADXOX         | 152.378       | O4        | CEAMZN         | 152.218       | O2        |
| OMODEB         | 152.562       | N4        | ADUGAK         | 152.377       | O3        | NASJOI         | 152.212       | N7        |
| YENVEV         | 152.562       | N2        | JIDWOL         | 152.375       | N8        | NANZIM         | 152.202       | S1        |
| DUBMOF         | 152.559       | O5        | UFAGAK         | 152.371       | O7        | XOMMIX         | 152.2         | O5A       |
| LUBPEG         | 152.549       | O14A      | FODZAA         | 152.369       | O8        | ACOGOP         | 152.197       | O3        |
| MAZLOO         | 152.538       | O15       | KEDQOB         | 152.364       | O5        | ALERAM         | 152.197       | O7        |
| UDACEH         | 152.537       | O6        | UKESAF         | 152.363       | CI3       | NOPCOK         | 152.194       | O11       |
| LUZZEM         | 152.525       | O5A       | IXUDAH         | 152.359       | N8A       | JIQPAA         | 152.192       | O2        |
| QOFKIF         | 152.525       | O9        | DILBIK         | 152.357       | O7        | EBIPUC         | 152.189       | O5A       |
| YAKYIV         | 152.519       | S2        | WEJXAO         | 152.35        | N2A       | RUTWUZ         | 152.185       | O13       |
| AJOWED         | 152.518       | O7        | LUJQIS         | 152.349       | O3        | INUWOD         | 152.181       | N7        |
| XAGQAZ01       | 152.51        | O8        | ICUFIW         | 152.346       | CI1       | UXUTAK         | 152.174       | O7        |
| QUTCUF         | 152.507       | CI2       | ZZZDVY03       | 152.346       | O9        | SUNQUN         | 152.172       | N7        |
| ZIPTAW         | 152.172       | CI2       | UMOVIC         | 152.026       | N4        | WETFOT         | 151.88        | O2        |
| AHOMUH         | 152.172       | O8        | TOHYUM         | 152.023       | O16       | NIYNUG         | 151.879       | O4        |
| UGAFIS         | 152.171       | N4        | QISYAU         | 152.022       | N3A       | ESAVEB         | 151.878       | N1        |
| ACACZM01       | 152.171       | O1        | JOMGOK         | 152.02        | O4        | EYURUN         | 151.876       | O6        |
| RUZTEL         | 152.167       | O2        | QETTOZ         | 152.017       | N2        | NOPRAM         | 151.876       | O19       |
| BOTPOQ         | 152.164       | O3D       | QEDPIB         | 152.016       | O3        | NELHUJ         | 151.874       | O9        |
| SASGEY         | 152.157       | O5        | WOHQIV         | 152.015       | O9        | UYAJIO         | 151.869       | O3        |
| JABDID         | 152.155       | N3        | LAVWIO         | 152.012       | O4        | EBITAM         | 151.867       | CI1A      |
| DUCKIW         | 152.152       | O11       | VIVXOO         | 152.007       | O1        | QEKQUW         | 151.867       | CI1       |
| BIZFUL         | 152.151       | O4        | OYOWEH         | 152.003       | N4        | SIKBIZ         | 151.864       | O8        |
| JONXIV         | 152.147       | N14       | DEXPAB         | 152           | CI2       | BUYBED         | 151.859       | O1        |
| RESBEW         | 152.144       | N4A       | QAMLUL         | 151.999       | N5        | SUPTIH         | 151.855       | F11       |
| GAKQER         | 152.143       | O4        | CEPBOR         | 151.999       | O2        | BEQVEA         | 151.854       | N1        |
| NOQDAA         | 152.134       | N3        | KALJEN         | 151.998       | O8        | FAYROM01       | 151.853       | N8        |
| ARAFOQ         | 152.133       | O8        | EYURUN         | 151.992       | O5        | ZAPXUN         | 151.85        | F21       |
| SIKTAI         | 152.13        | N5        | DAGXUF         | 151.989       | O12       | DEKGAD         | 151.849       | O4        |
| DAXXAE         | 152.13        | O2        | QUSVIJ         | 151.987       | O2        | FIKNIX         | 151.847       | O8        |
| JUFVIS         | 152.129       | O2        | TUFLOW         | 151.987       | O9        | XOQXEH         | 151.843       | O6        |
| RICKIA         | 152.127       | N2A       | CEVYIM01       | 151.98        | O6        | ULEXER         | 151.842       | O11       |
| UYUBAS         | 152.127       | O2        | LUNBIF         | 151.979       | O6        | BAQHOQ         | 151.827       | N12       |
| EMOJUM         | 152.126       | N1A       | QORFAE         | 151.977       | O2        | FAYROM         | 151.817       | N6        |
| GAKQER         | 152.123       | O8        | PAHPIB         | 151.971       | O7        | RAGVIH         | 151.813       | O10       |
| ITOBES         | 152.119       | O4B       | KIXVAS         | 151.966       | CI1       | DAPNEP         | 151.81        | CI1       |
| KEMKIX         | 152.117       | O19       | NEMVAD         | 151.966       | O6        | KUJCIE         | 151.808       | O4        |
| MONDUQ         | 152.116       | O4        | LAVWIO         | 151.965       | O7        | XUXPAI         | 151.805       | N3        |
| LULWUM         | 152.112       | O5        | ZITSAY         | 151.959       | O7        | CECFEY         | 151.804       | N4        |
| NEYSUH         | 152.109       | O6A       | WIGLAA         | 151.95        | O5        | TEHDOA         | 151.8         | O6        |
| XAPXOB         | 152.109       | O2A       | RUNSOI         | 151.939       | O5        | QUCYOD         | 151.796       | N6        |
| FEDYAQ         | 152.108       | CI1       | QIDQIH         | 151.938       | O2B       | RABCEE         | 151.794       | O2        |
| SIXTAV         | 152.107       | O6        | TIBQAA         | 151.935       | O3        | YEPLIR         | 151.793       | O10       |
| CODVAV         | 152.103       | O5        | BEMPIU         | 151.932       | O1        | ZOGNER         | 151.786       | O3A       |
| SEQRIS         | 152.094       | O3        | MATVAG         | 151.931       | O7        | NOLXOD         | 151.784       | O3        |
| ZZZDVY03       | 152.093       | O1A       | YUZQIV         | 151.93        | N2        | ULEPOS         | 151.782       | N3        |

|                |               |           |                |               |           |                |               |           |
|----------------|---------------|-----------|----------------|---------------|-----------|----------------|---------------|-----------|
| OYOWIL         | 152.086       | O3        | HUNMUA         | 151.929       | N5        | CEVYIM         | 151.766       | O6        |
| EDUBEM         | 152.08        | O1        | JOXGIP         | 151.925       | O3        | LAVWIO         | 151.766       | O5        |
| <b>Refcode</b> | <b>∠YZnLB</b> | <b>LB</b> | <b>Refcode</b> | <b>∠YZnLB</b> | <b>LB</b> | <b>Refcode</b> | <b>∠YZnLB</b> | <b>LB</b> |
| GIZGAA         | 152.073       | O10       | CEXSOO         | 151.923       | N1        | EXOFAZ         | 151.763       | O9        |
| ASIZAG         | 152.072       | O1        | GAYZIP01       | 151.922       | O4        | VAJLID         | 151.763       | O15       |
| IBIDAY         | 152.066       | O5        | UNAGOH         | 151.922       | O14       | XOQZUZ         | 151.763       | O1        |
| AQUHIG         | 152.065       | O2        | GUPBOK         | 151.91        | O3        | KIXLAG         | 151.762       | O2        |
| OYOWEH         | 152.064       | N23       | DUCJAN         | 151.904       | O10       | LAXSAH         | 151.758       | O2        |
| EPEYII         | 152.064       | O12       | NAFHAE         | 151.901       | O4        | DEBSUZ         | 151.755       | O44       |
| QUCYOD         | 152.06        | N8        | JIDXEC         | 151.899       | N13       | IGAWET         | 151.737       | N11       |
| OPICOI         | 152.06        | O22       | MAKHAH         | 151.895       | N4        | PUDBAT         | 151.737       | N13       |
| JOMGOK         | 152.05        | O3        | JITRIR         | 151.889       | O2        | TAVCIF         | 151.731       | N2        |
| UNAGUN         | 152.05        | O14       | TIBQEE         | 151.883       | F2        | RIFNAW         | 151.73        | O7        |
| QUCZUK         | 152.046       | Cl6       | SESPIQ         | 151.882       | O1        | SEQHAY         | 151.728       | Cl2       |
| GIBROA         | 152.046       | O4        | JOXGIP         | 151.881       | Cl4       | HISWAK         | 151.724       | O9        |
| QUBLAB         | 152.041       | O7        | YERAB          | 151.881       | O4        | ISEMEZ         | 151.721       | O20       |
| IJEXOL         | 152.038       | O7F       | CEBLOM         | 151.88        | Cl3       | VOQVOO         | 151.712       | O1A       |
| AJOSUN         | 151.702       | O1D       | NENXUC         | 151.527       | O3A       | HOQZUJ         | 151.339       | N1        |
| FAXZIR         | 151.697       | S1        | OPIRAJ         | 151.526       | O19       | KADXAQ         | 151.334       | Cl3       |
| NEGJOZ         | 151.684       | N8        | VAJLUP         | 151.525       | O1        | EMOTOQ         | 151.333       | O5        |
| ROZDAN         | 151.679       | N7        | KEMKET         | 151.523       | O16       | OXUSIK         | 151.332       | N8        |
| EWOVET         | 151.678       | N2C       | HOQZUJ01       | 151.517       | N2        | BUBDIN         | 151.332       | O10       |
| AMERIT         | 151.678       | O9        | NEGHUD         | 151.514       | N10       | NAFYAX         | 151.332       | O4        |
| EWUXIF         | 151.678       | O6A       | COKXIK         | 151.514       | Cl2       | DAMSUH         | 151.323       | O4        |
| TAHFIS         | 151.676       | N4        | KUBVOU         | 151.5         | O5        | KIXVAS         | 151.323       | O5        |
| RIPLEJ         | 151.676       | O5        | NAKPUM         | 151.499       | Cl2       | MIJNEB         | 151.321       | S2        |
| USATIS         | 151.674       | O6        | UJAPOL         | 151.499       | O7A       | OQIPEL         | 151.319       | N7        |
| ALELAG         | 151.673       | S1        | ISUMAK         | 151.492       | N8        | URORAX         | 151.308       | O9A       |
| WILQUF         | 151.663       | N2        | OPIFIE         | 151.492       | O2C       | VIMNAJ         | 151.306       | O2        |
| EDUBEM01       | 151.661       | O4        | ASOYAK02       | 151.489       | O2        | HUPXUM         | 151.299       | O5        |
| DIJMOA         | 151.65        | Cl8       | NECVAT         | 151.474       | O2        | UPUSUU         | 151.295       | O2B       |
| RORSOI         | 151.647       | O1        | JIWKOQ         | 151.473       | N14       | GETPEE         | 151.294       | O8        |
| YAXNIX         | 151.647       | O13       | ANOREB         | 151.473       | O1        | XIQFIO         | 151.294       | O3        |
| KOBKIY         | 151.643       | O6        | ELAMOW         | 151.473       | O4        | CORCIX         | 151.293       | O8        |
| YEXJOB         | 151.642       | N6        | ALONEU         | 151.472       | N4        | XUHFOX         | 151.286       | O2A       |
| YUZQER         | 151.639       | N2        | KIWZOJ         | 151.465       | O2        | KOZLIX         | 151.284       | N9        |
| NIQSUD         | 151.639       | O15       | EWOHUU         | 151.461       | O10       | XEYSOM         | 151.277       | S2        |
| QARVEL         | 151.633       | O5        | KOZJUH         | 151.453       | O5        | MEBSIX         | 151.272       | N15       |
| ECURIF         | 151.63        | Cl2       | KEJTIG         | 151.45        | N3        | DURMAF         | 151.271       | O2        |
| MURQIA         | 151.628       | N1        | XUNWIM         | 151.448       | O6        | RAJDOX         | 151.27        | O7        |
| QAMLUL         | 151.624       | O3        | ROBCIU         | 151.445       | O15       | UPUSUU03       | 151.268       | O3B       |
| CAPWAU         | 151.623       | O4        | HUKSAK         | 151.437       | O12       | NUDHEB         | 151.265       | O7        |
| AWEHOC01       | 151.621       | Cl2       | RORSEY         | 151.428       | O6        | EBUBEL         | 151.26        | O6        |
| LEZCUR         | 151.619       | O2        | TOLMUF         | 151.425       | O4        | QUBKII         | 151.259       | O11       |
| LOQFEE         | 151.613       | O2        | ROFLUW         | 151.422       | O1        | KODYOT         | 151.251       | Cl1       |
| QIBZAG         | 151.612       | O2        | ZZZDVY03       | 151.419       | N2A       | GAYZIP         | 151.25        | O1        |
| NEWVIU         | 151.609       | O11       | IBONOD         | 151.417       | O1        | UNECUN         | 151.249       | O10       |
| GIQZEP         | 151.605       | O4        | SUYBIA         | 151.417       | O14       | EBISUF         | 151.248       | Cl5       |
| HAHZEW         | 151.596       | O5        | LUGTAJ         | 151.414       | O4        | UZOCUK         | 151.242       | O2G       |
| DEHFUR         | 151.593       | O1        | ZEPPOC         | 151.403       | N4        | UPUSUU04       | 151.241       | O2B       |
| IYUGEO         | 151.591       | N8        | MOPFUU         | 151.397       | N3C       | UWADUT01       | 151.232       | O5        |
| AJOSUN01       | 151.591       | O1D       | UBOYOC         | 151.395       | O6        | WENTAN01       | 151.221       | O1        |
| UJEYIT         | 151.59        | O12       | IDUJAT         | 151.394       | O7        | OHALAL         | 151.22        | O2D       |
| XIDROS         | 151.589       | O11       | NOQCAA         | 151.387       | Cl4       | MUZVUY         | 151.219       | N1        |
| PIDMEV01       | 151.588       | O7        | DUPRAI         | 151.386       | O6        | RAMGES         | 151.219       | O5        |
| TERQEM         | 151.588       | O2        | VIWJIW         | 151.385       | O4        | JAWVEM         | 151.201       | N1        |
| LISZEU         | 151.587       | O11       | JUKHII         | 151.383       | O5E       | VETNAK01       | 151.198       | O4        |
| CUYDAD         | 151.581       | N7        | NAHGOU         | 151.378       | Cl1       | ELAMUC         | 151.196       | O3        |
| ISEMEZ         | 151.576       | O11       | OXOGUG         | 151.37        | Se2       | WENTAN         | 151.196       | O8E       |
| LESSEI         | 151.575       | Cl2       | CAGLAB         | 151.365       | N12       | MOLQOV         | 151.195       | O6        |

|                |               |           |                |               |           |                |               |           |
|----------------|---------------|-----------|----------------|---------------|-----------|----------------|---------------|-----------|
| RUGYIE         | 151.569       | O24       | MOJKAY         | 151.365       | O71       | EDOZEC         | 151.187       | N3A       |
| AYISEH01       | 151.561       | O1        | NAHHEL         | 151.361       | CI2       | VUNJAR         | 151.187       | O14       |
| <b>Refcode</b> | <b>∠YZnLB</b> | <b>LB</b> | <b>Refcode</b> | <b>∠YZnLB</b> | <b>LB</b> | <b>Refcode</b> | <b>∠YZnLB</b> | <b>LB</b> |
| MARDAN         | 151.556       | O5        | RUHWIA         | 151.357       | O8        | OYOWEH         | 151.185       | O1        |
| LELDEM         | 151.549       | O3        | HOPLOQ         | 151.346       | N3        | GECVAO         | 151.182       | F5        |
| ZZZDVY04       | 151.538       | N1        | NAHGUB         | 151.346       | N5        | FUPQOW         | 151.18        | O22       |
| XOLCEH         | 151.53        | O17       | CAVVIG         | 151.345       | O24       | MOJZUG         | 151.18        | O13A      |
| TUFLOW         | 151.179       | O10       | BULFIZ         | 150.992       | O5        | OZUNEF         | 150.801       | O6        |
| RERKUW         | 151.17        | O20       | PENQIK         | 150.991       | N3        | ASEROI         | 150.797       | O9        |
| SIZRIC         | 151.169       | N9        | YEYFIT         | 150.99        | O18       | MEZNIR         | 150.793       | O12       |
| CEAMZN01       | 151.168       | O1        | AQAPUE         | 150.985       | N6        | NACZIE         | 150.784       | O10       |
| TEHDOA         | 151.159       | O11       | KIBZAX         | 150.975       | O8        | IDATUE         | 150.776       | N2        |
| MIPYEQ         | 151.158       | O7        | YEZFUI         | 150.972       | N3        | NEZDEB         | 150.775       | O1        |
| WAZBAC01       | 151.144       | CI2       | MOJKAY         | 150.97        | O8        | QARVELO1       | 150.764       | O5        |
| WEZNUM         | 151.144       | O6        | SIXJIV         | 150.967       | O4        | BUYBAZ         | 150.757       | O2        |
| ISODOJ         | 151.14        | O12       | EJINOB         | 150.959       | O2        | BUYBAZ         | 150.747       | O2        |
| ZOJXIH         | 151.139       | N3        | DEDNAF         | 150.958       | O10       | REGQUT         | 150.747       | O21       |
| TODJUT         | 151.136       | O16       | FEYQAD         | 150.953       | O4        | POMNAI         | 150.746       | N2        |
| ASOYAK01       | 151.135       | O2        | QOFKIF         | 150.938       | O4        | XIKSAL         | 150.739       | F8        |
| LIWYAS         | 151.134       | O11       | KADXAQ01       | 150.929       | CI13      | POMNAI01       | 150.738       | N14       |
| KIWZOJ         | 151.124       | O1        | PEMBOY         | 150.929       | O4        | NIKMAW         | 150.727       | N14       |
| LAVWIO         | 151.122       | CI3       | KIJKEW         | 150.925       | O6        | KIWZOJ         | 150.719       | O6        |
| YUXRAM01       | 151.122       | O3        | BOCRET         | 150.921       | CI4       | LOZQEY         | 150.713       | O6        |
| EXETIN         | 151.12        | O8        | NOKDIA         | 150.91        | O5        | QUCGAY01       | 150.71        | O6        |
| ASOYAK         | 151.119       | O2        | TUFJAG         | 150.91        | O1        | TUMGAM         | 150.705       | N6        |
| EBUBOV01       | 151.118       | O5A       | QUMJOZ         | 150.909       | N5        | JENBIQ         | 150.704       | N1        |
| FUBTIF         | 151.118       | O2        | ADOKEN         | 150.908       | O13       | HYZCZN         | 150.698       | O1        |
| XEMYUM         | 151.117       | O4A       | RUDWUJ         | 150.897       | N3B       | IREYOW         | 150.698       | O13       |
| SENFUP         | 151.108       | O7        | SIJHUR         | 150.892       | O10       | VUNJIY         | 150.698       | O4        |
| YAXNIX         | 151.107       | O6        | MAZLOO         | 150.889       | O18       | CEBCUJ         | 150.695       | O4        |
| MIGXOS         | 151.093       | N2D       | UDIRUW         | 150.888       | O4        | NUDNIL         | 150.695       | O13       |
| WARCOJ         | 151.078       | O11       | DIZDIC         | 150.886       | N1        | JONXIV         | 150.692       | N3        |
| SUYBEW         | 151.076       | O14       | YORQII         | 150.886       | O9        | TAPREK         | 150.691       | O3        |
| XEPCOM         | 151.075       | O6        | LEZCUR         | 150.883       | O5        | IDOHEs         | 150.689       | O1        |
| FOVGAZ         | 151.074       | O4        | DARPET         | 150.881       | O13       | NARKEA         | 150.689       | O5        |
| QOLDIF         | 151.074       | O2        | HAILOV         | 150.877       | O8        | PIKYOY         | 150.685       | O7        |
| XUXQEN         | 151.061       | F16       | WUJRUP         | 150.877       | O4        | ZAJKOO         | 150.685       | O4        |
| FEDYEU         | 151.057       | O10       | UGEZEN         | 150.876       | O3        | LARLUN         | 150.679       | O7        |
| CAFSAF         | 151.053       | O4        | LOXZED         | 150.875       | O8        | TULLUJ         | 150.676       | F2        |
| LOYMET         | 151.052       | F5        | IWAYOV         | 150.874       | CI1       | ISEMEZ         | 150.67        | O25       |
| DEHFUR01       | 151.045       | O20       | GICMAI         | 150.871       | O28       | IQAGUC         | 150.669       | S1A       |
| VEHDER         | 151.04        | O3        | QOPNOA         | 150.869       | N4        | NAHHEL         | 150.668       | CI3       |
| MOSNEN         | 151.039       | O8        | IGAVIV         | 150.867       | N10       | GARWIH         | 150.668       | O9        |
| QEKQUW         | 151.034       | O2        | PAFWEY         | 150.864       | O6        | QAYWUM         | 150.667       | O3B       |
| FUPQOW         | 151.032       | O14       | PAFWEY10       | 150.864       | O6        | AYISEH         | 150.656       | O2        |
| BEQVEA         | 151.028       | N4        | MUJKEI         | 150.855       | CI1       | XIXCUD         | 150.652       | CI18      |
| EJINUH         | 151.025       | O1        | JAHZOI         | 150.853       | O6        | PAWDOK         | 150.652       | O17       |
| NEPLIE         | 151.024       | O5        | NOJPEJ         | 150.844       | N3        | XIKWEU         | 150.645       | O6        |
| LACGAA01       | 151.02        | O2        | FEJJOV         | 150.837       | O16       | AFUWEG         | 150.642       | N7        |
| VOTJOG         | 151.016       | S2        | ELALOT         | 150.836       | F6        | EMOQIH         | 150.642       | N5        |
| WEMZUJ         | 151.012       | O6        | QEXMEO         | 150.835       | O5        | CIVQEG         | 150.641       | O5        |
| MAHSUL         | 151.012       | S1        | WALBOC02       | 150.835       | O3        | TAPRIO         | 150.639       | O3        |
| BOJVUR         | 151.011       | O1        | EPITEF         | 150.822       | N3        | ASEROI         | 150.63        | O5        |
| BOFGEL         | 151.009       | O4        | WUPZOY         | 150.814       | N1        | WETFOT         | 150.626       | O5        |
| ERIRAZ         | 151.008       | O2        | ESoyUG         | 150.813       | O8        | PUMGOV         | 150.624       | O4        |
| LOCVIL         | 150.995       | O2        | YEYSAY         | 150.804       | N5        | VETNAK         | 150.624       | O3        |
| UQENAG         | 150.622       | S2        | FODNAQ         | 150.467       | O9        | TAVCEB         | 150.289       | N7        |
| MELGIX         | 150.621       | N3        | ITOBEE         | 150.466       | O8        | OQEZER         | 150.287       | O10       |
| TIRHIN         | 150.621       | O3        | QITDAA01       | 150.459       | O4        | IDAVAN         | 150.284       | O4        |
| UTEJUJ         | 150.621       | O9        | NENXUC         | 150.45        | O6A       | IZOWEA         | 150.284       | P1        |

|                |               |           |                |               |           |                |               |           |
|----------------|---------------|-----------|----------------|---------------|-----------|----------------|---------------|-----------|
| WARCAV         | 150.619       | N6        | QIBYEJ         | 150.445       | C12       | HIYXIZ         | 150.274       | O12       |
| FONNUR         | 150.619       | O1        | DUJTIO         | 150.441       | O2        | LUMLUC         | 150.272       | O1A       |
| <b>Refcode</b> | <b>∠YZnLB</b> | <b>LB</b> | <b>Refcode</b> | <b>∠YZnLB</b> | <b>LB</b> | <b>Refcode</b> | <b>∠YZnLB</b> | <b>LB</b> |
| MUDKOM         | 150.618       | O6        | MOKYAO         | 150.439       | N1        | EMOQIH         | 150.268       | N2        |
| ESoyUG01       | 150.617       | O4        | WAZBAC01       | 150.438       | C11       | KUBVOU         | 150.265       | O10       |
| PEMBOY         | 150.617       | O9        | PIJGUM         | 150.436       | N7        | HESFIY         | 150.264       | N5B       |
| MOJKAY         | 150.614       | O74       | BIZFUL         | 150.428       | O5        | WEBRAZ         | 150.256       | O8        |
| IREYIO         | 150.605       | N2        | EBUBOV         | 150.425       | O5A       | SUPRUQ         | 150.253       | N5        |
| LASMEZ         | 150.605       | O8        | ISODOJ         | 150.425       | O10       | WAZBAC         | 150.25        | C12       |
| CATRAR         | 150.598       | N1        | YAVMIS         | 150.42        | N2        | OFUGAY         | 150.248       | O8        |
| RAXNAH         | 150.598       | O10       | JILQUU         | 150.416       | N2        | NACZIE         | 150.245       | O12       |
| BASZUU         | 150.596       | O34       | MAPNAW         | 150.414       | N3A       | XUQCOB         | 150.241       | C11       |
| SINXEU         | 150.596       | O10       | KEMKIX         | 150.411       | O24       | ELAMOW         | 150.232       | O3        |
| MOTTUM         | 150.581       | O11       | RUNVAY         | 150.409       | N2        | HENYUV         | 150.23        | O3        |
| AFIQUB         | 150.58        | O10       | IQAGUC01       | 150.402       | S2A       | MUHVIW         | 150.228       | O1C       |
| FIZGUT         | 150.58        | O3        | JONXIV         | 150.399       | N13       | JEVCAP         | 150.222       | O5        |
| IJEDOR         | 150.57        | O5        | DUGYUA         | 150.399       | O6E       | SIXJER         | 150.219       | O1        |
| VIGBAQ         | 150.57        | O4        | ESoyUG         | 150.398       | O5        | BUQROV         | 150.218       | N1        |
| LASMEZ         | 150.569       | O25       | ICUDIU         | 150.397       | O2        | SARCIA         | 150.218       | O9        |
| RIPLUB         | 150.567       | N5        | WUJRUP         | 150.395       | N7        | GANGIM         | 150.215       | O4        |
| SUYBEW         | 150.565       | O15       | LAPYIO         | 150.382       | N6A       | KUPHEL         | 150.212       | O5        |
| SUWBOC         | 150.564       | O11       | DUDLUL         | 150.375       | C15       | KUBNAX         | 150.208       | N1        |
| UMIQOW         | 150.562       | O6        | MUVVUW         | 150.375       | O1        | VIRLAK         | 150.201       | O47       |
| RAJDOX         | 150.559       | O7        | ERIKOG         | 150.367       | O2        | BIZFUL         | 150.196       | O4        |
| XIDJUR         | 150.558       | O6        | AVOKOM         | 150.355       | O4        | XAGBOZ         | 150.195       | N7        |
| RUZSUA         | 150.553       | O18       | JAHNOY         | 150.347       | O5        | QOFKIF         | 150.192       | O17       |
| WOJJEK         | 150.553       | O5        | QANZEL         | 150.347       | O1        | FALMUC         | 150.19        | O2A       |
| VOWYAJ         | 150.552       | C11       | RATXAN         | 150.346       | O7        | VUFJUB         | 150.189       | O3        |
| LESGOI         | 150.552       | O1        | JONNUY         | 150.341       | C12       | OMEWOU         | 150.188       | N3        |
| NACHOR         | 150.543       | O8A       | JIDXEC         | 150.34        | N3        | SIBMIC         | 150.18        | N4A       |
| HUDMOJ         | 150.539       | O16       | ETUXUM         | 150.334       | O3B       | OFUGAY         | 150.173       | O37       |
| CEJZAW         | 150.527       | N2        | WECKOH         | 150.334       | O10       | MEMNUN         | 150.171       | O9        |
| KEMKET         | 150.524       | O19       | JOBPUL         | 150.331       | O6        | DEHFUR01       | 150.166       | O1        |
| VAJHIA         | 150.523       | O4F       | REXUU          | 150.33        | O4        | IXACUF         | 150.161       | O9        |
| QUMJOZ         | 150.521       | N7        | REFLEV         | 150.319       | O2        | YEYVEH         | 150.152       | O6        |
| DAYPOK         | 150.517       | O3        | LUGREK         | 150.314       | N1        | QUCGAY         | 150.146       | O6        |
| ZIDBUN         | 150.509       | O1A       | QAPBER         | 150.312       | O6        | PIJBAM         | 150.144       | O15       |
| ELUKOO         | 150.508       | O7        | WEYHEP         | 150.308       | O5        | OGUQAL         | 150.139       | O10       |
| NOJPIN         | 150.503       | N4        | ZIHQIU         | 150.308       | O4        | SUPLAR         | 150.135       | O9        |
| XUXQEN         | 150.503       | O1        | HENQIB         | 150.303       | C13       | QOMFEF         | 150.131       | O58       |
| UWABEB         | 150.499       | O9        | ELUKII         | 150.302       | O19       | ACUGUD         | 150.129       | N8        |
| GIJLIY         | 150.486       | N6        | NANHAO         | 150.3         | O4        | PEWGOO         | 150.115       | C16       |
| KOBKIY         | 150.481       | O7        | VUYBEX         | 150.3         | O5        | ONOPOX         | 150.113       | C111      |
| WOMWIH         | 150.478       | O5        | XAGNEZ         | 150.3         | O17       | SEBXIG         | 150.109       | N2        |
| TUBPIR         | 150.477       | N2        | KEBGIK         | 150.296       | O10       | SEBXIG10       | 150.109       | N2        |
| CAYFUE         | 150.467       | O11       | SOTJAN         | 150.296       | O22       | BINBAE         | 150.102       | O3        |
| ISIWOZ         | 150.087       | N6        | TESNUC         | 149.931       | O8        | DUDRIG         | 149.751       | O6        |
| VUMNAU         | 150.087       | N4        | WUXVUH         | 149.928       | O8        | MOHRAD         | 149.747       | O4A       |
| RATJUT         | 150.086       | F1        | TIPJEL         | 149.927       | O3        | TIVJIT         | 149.747       | O38       |
| RESSUH         | 150.079       | O8        | IXOQIY         | 149.924       | N13       | YEKVAP         | 149.74        | N1        |
| ACUGUD         | 150.069       | N5        | VELROV         | 149.919       | O6        | VIJNUZ         | 149.739       | N10       |
| IZAPAD         | 150.06        | O14       | HEZFAU         | 149.914       | C18       | JIDWUR         | 149.738       | N6        |
| QAPBIV         | 150.058       | O6        | XAPXOB         | 149.914       | O2        | NOPCUQ         | 149.736       | O12       |
| DATFUZ         | 150.056       | O6        | XIDBOF         | 149.914       | O10A      | UMAMED         | 149.73        | O2A       |
| IGAWET         | 150.055       | O5        | LAPYOU         | 149.907       | N1A       | QEHZAH         | 149.728       | O4        |
| KOZJUH         | 150.051       | O16       | SINWUI         | 149.907       | O2        | ROBCIU         | 149.724       | O27       |
| SEBXIG         | 150.05        | N1        | JENBEM         | 149.9         | N4        | DAGXUF         | 149.722       | O11       |
| SEBXIG10       | 150.05        | N1        | FUPQOW         | 149.895       | O7        | MAZLOO         | 149.716       | O18       |
| KIBZAX         | 150.05        | C11       | YOVBIV         | 149.883       | O2        | ADECAP         | 149.715       | O4        |
| HAWCOY         | 150.045       | C12       | LUWTAY         | 149.88        | N6        | SETRER         | 149.713       | N2        |

|                |               |           |                |               |           |                |               |           |
|----------------|---------------|-----------|----------------|---------------|-----------|----------------|---------------|-----------|
| ZIWROP         | 150.041       | O3        | OMAKUL         | 149.871       | N3        | IFIYIG         | 149.711       | O18       |
| ACUGUD         | 150.039       | N5        | ZUJZUB         | 149.868       | O9        | ESIWEK         | 149.71        | O5        |
| <b>Refcode</b> | <b>∠YZnLB</b> | <b>LB</b> | <b>Refcode</b> | <b>∠YZnLB</b> | <b>LB</b> | <b>Refcode</b> | <b>∠YZnLB</b> | <b>LB</b> |
| MUZROP         | 150.039       | N1        | DAPPAM         | 149.864       | O4        | TALTUX         | 149.705       | N3        |
| KEMKET         | 150.036       | O9        | ACOGOP         | 149.862       | O3        | DATFUZ         | 149.705       | O4        |
| MAQLEY         | 150.034       | O3        | QANCAJ         | 149.856       | O2B       | DAGYAM         | 149.702       | O7        |
| RAXNAH         | 150.034       | O21       | SERIZN10       | 149.85        | O6        | NEKPOK         | 149.691       | O7        |
| PATDEW         | 150.027       | CI3       | XINZUR         | 149.849       | O1A       | WUPTAE         | 149.69        | O14       |
| HOLJAV         | 150.027       | F1        | GATHUF         | 149.848       | CI1       | BUBDIN         | 149.688       | O11       |
| IXUDAH         | 150.025       | N7A       | KEPGOF         | 149.848       | O10       | SUYBEW         | 149.688       | O13       |
| QIDXIL         | 150.024       | CI1B      | LUJQIS01       | 149.846       | O3        | YIMKEM         | 149.687       | O4C       |
| IMEFOV         | 150.02        | CI1       | BIMMAO         | 149.842       | O5        | JIDWOL         | 149.686       | N1        |
| HENYUV01       | 150.018       | O3        | XUYXEV         | 149.835       | O6        | JUQZOM         | 149.686       | N5        |
| SINXEU         | 150.012       | O12       | VIQYEA         | 149.834       | O2        | PATZUF         | 149.686       | O15       |
| OVIDEF         | 150.009       | O5        | EBEZAQ         | 149.83        | N2        | KAPWUV         | 149.685       | O72       |
| TISGOR         | 150.009       | O3        | MAPMOJ         | 149.829       | N1A       | JAKPAN         | 149.679       | O3A       |
| NEKXOU         | 150.007       | O4        | YIMWAU         | 149.828       | O1        | GIXPIQ         | 149.676       | N26       |
| MIQVAL         | 150.003       | O4        | CERGAI         | 149.822       | O5        | CUHKUN         | 149.676       | CI1       |
| ESASUN         | 149.999       | O6        | ACUGUD         | 149.819       | N8        | MOJKAY         | 149.673       | O89       |
| QOFKIF         | 149.985       | O12       | EKOZUA         | 149.818       | O1        | PAYCAX         | 149.669       | O9        |
| QOMFEF         | 149.979       | O55       | ZZZDVY02       | 149.81        | O5F       | AWUCUQ         | 149.668       | O8        |
| DUDROM         | 149.976       | O6        | BOBHEF         | 149.807       | O3        | LASMEZ         | 149.661       | O5        |
| KEDQUH         | 149.975       | O1        | JENBEM         | 149.805       | N1        | CEYWEL         | 149.657       | CI10      |
| DIFWEU10       | 149.971       | N3A       | VAJLID         | 149.792       | O13       | ISOKOQ         | 149.648       | O6        |
| KIFNEV         | 149.954       | O2        | EQERUP         | 149.789       | O5        | XUSGUN         | 149.64        | O5        |
| JOHLUQ         | 149.951       | O2        | SUWBOC         | 149.782       | O8        | PENQIK         | 149.637       | O6        |
| DITWEL         | 149.95        | O4        | IXELOO         | 149.773       | O5        | RUCMAE01       | 149.636       | O1        |
| IDOHES         | 149.95        | O2B       | XAGNEZ         | 149.773       | O20       | IBUHIY         | 149.636       | Se6A      |
| BEPLUF         | 149.949       | O2D       | PIFFEQ         | 149.772       | N1        | VUSHIC         | 149.634       | N2        |
| SOXQEE         | 149.948       | N1        | ROFLUW         | 149.77        | N11       | IFIXAW         | 149.634       | O22       |
| MUJQAL         | 149.946       | O7        | SUYBIA         | 149.766       | O13       | FEQVEE         | 149.633       | O2        |
| LASMEZ         | 149.943       | O15       | KABXUI         | 149.764       | S3        | BOFGEL         | 149.629       | O1        |
| LAGVEX         | 149.939       | N13       | BOFVAU         | 149.761       | O5        | WERJOT         | 149.618       | O11       |
| CORCIX         | 149.938       | O4        | XEGGEX         | 149.758       | CI6       | HISWAK         | 149.612       | N1        |
| JENBIQ         | 149.933       | N4        | SITCIH         | 149.758       | O3        | KEDQER         | 149.61        | O10       |
| CABPEE         | 149.932       | O12       | GEXWIS         | 149.752       | N4        | SUVPEH         | 149.6         | O24       |
| MOSNOX         | 149.593       | O7        | DELKOY         | 149.429       | O5        | UGEZIR         | 149.262       | O3        |
| PEDPIY         | 149.59        | N4        | MIVDIF         | 149.427       | CI1       | DISWOU         | 149.26        | O5        |
| CERGAI         | 149.59        | O6B       | QIBNOE         | 149.426       | O3A       | FUNPOW01       | 149.255       | O1        |
| LETROV         | 149.587       | O1        | BASZUU         | 149.424       | O31       | DINTAX         | 149.252       | N6        |
| COGLES         | 149.586       | O5        | SUSWAF         | 149.424       | O6        | MOJZUG         | 149.25        | O14A      |
| MULQOA         | 149.584       | O13       | LICXED         | 149.419       | O9        | VEXTUP         | 149.25        | O22       |
| DUNXUH         | 149.57        | O1        | ZZZDVY04       | 149.417       | O3        | IVOXAT         | 149.248       | O4        |
| MIQVEP         | 149.565       | O4        | FEBFIC         | 149.414       | CI2       | QIBNOE02       | 149.248       | O1A       |
| FIFWIB         | 149.563       | N7        | DUNXUH06       | 149.41        | O5        | UQULUQ         | 149.24        | O7        |
| YOXMIK         | 149.554       | N5        | DUNXUH15       | 149.408       | O1        | DUNXUH08       | 149.231       | O1        |
| EQOZOB         | 149.548       | O5        | WEBRUT         | 149.408       | O8        | JULKUZ         | 149.217       | N2A       |
| CEZVIO         | 149.545       | O6        | XIYZUA         | 149.408       | O10       | DUNXUH21       | 149.217       | O1        |
| NIPWIT         | 149.545       | O6C       | SARXAO         | 149.405       | O6        | VIMKOV         | 149.214       | N6        |
| EVURUJ         | 149.543       | O3        | MIBHIQ         | 149.401       | N1        | QIBNOE01       | 149.209       | O9A       |
| ZZZDVY03       | 149.54        | O5A       | BEPJOY         | 149.401       | O8        | ARAGUX         | 149.207       | O4B       |
| XIYBUE         | 149.532       | O3        | FODZAA         | 149.398       | N2        | WARCOJ         | 149.2         | O12       |
| UTEXID         | 149.531       | N3        | AWEJOE         | 149.397       | S1        | MAKSOI         | 149.196       | O2A       |
| OJUJIM         | 149.527       | N3        | OJUJIM         | 149.386       | N3        | SIGZEQ         | 149.193       | O98       |
| KIFWAZ         | 149.515       | N5        | TIQBEB         | 149.379       | O16       | FEFVAO         | 149.192       | O4        |
| PIJGUM         | 149.514       | N3        | OZUNEF         | 149.377       | O6        | YILBIG         | 149.19        | O4J       |
| IKACAA         | 149.514       | O2        | OZUNEF         | 149.376       | O7        | VOWXIO         | 149.186       | O3        |
| UHEZIT         | 149.514       | O9        | EKOZUA         | 149.374       | O4        | KEHNIW         | 149.185       | O9        |
| AQUHIG         | 149.512       | CI3       | HUPSIV         | 149.374       | O2        | GUVFUY         | 149.183       | O10       |
| XOFFEG         | 149.511       | CI1       | MOJZUG         | 149.368       | O9A       | XEDLUP         | 149.182       | CI9       |

|                |               |           |                |               |           |                |               |           |
|----------------|---------------|-----------|----------------|---------------|-----------|----------------|---------------|-----------|
| NOHFAU         | 149.51        | O3        | NITTIT         | 149.368       | O2        | OHUQAJ         | 149.182       | O18       |
| ETAPOG         | 149.506       | O16B      | DOSVAJ         | 149.365       | O5        | DATFUZ         | 149.18        | O2        |
| <b>Refcode</b> | <b>∠YZnLB</b> | <b>LB</b> | <b>Refcode</b> | <b>∠YZnLB</b> | <b>LB</b> | <b>Refcode</b> | <b>∠YZnLB</b> | <b>LB</b> |
| CAKYET         | 149.502       | N5        | FOXMIQ         | 149.355       | O25       | HAWFEU         | 149.178       | O35       |
| IBUHIY         | 149.5         | N9        | FUNPOW         | 149.354       | O1        | NUDNIL         | 149.175       | O16       |
| COVQIQ         | 149.5         | O14       | XAMSUC         | 149.354       | O8        | QUBLAB         | 149.169       | O10       |
| MIYMUC         | 149.5         | O6        | RATCEW         | 149.339       | N5        | QEXMEO         | 149.166       | O5        |
| KEKHEP         | 149.499       | O4        | TUYGAX01       | 149.338       | O3        | VETNAK01       | 149.166       | O5        |
| ROBCEQ         | 149.499       | O19       | PIJKAV         | 149.327       | O12A      | VOJMEP         | 149.163       | O2        |
| SENFUP         | 149.493       | N2A       | WUMXIM         | 149.325       | N5        | QORKIR         | 149.161       | O14       |
| PUMGOV         | 149.49        | O27       | EPEHOZ         | 149.322       | O3        | BOTPOQ         | 149.157       | O3        |
| PIJBAM         | 149.487       | O9        | LEZGAA         | 149.319       | N2        | JETGAU         | 149.156       | O3        |
| EFUJIA         | 149.486       | O4        | FAHJIJ         | 149.316       | O15       | LEYRIQ         | 149.129       | Cl1       |
| ROBCEQ         | 149.483       | O17       | MIXTAP         | 149.31        | O5        | CAWLIY         | 149.129       | O5        |
| JIDXEC         | 149.48        | N7        | COYHIJ         | 149.298       | O6        | DUNXUH14       | 149.126       | O1        |
| JIDWUR         | 149.479       | N4        | TUYGAX         | 149.297       | O3        | KUBVOU         | 149.126       | O10       |
| NERQAC         | 149.477       | O4A       | QAGGIS         | 149.294       | N4        | MEMPAV         | 149.126       | O11       |
| UZUYEV         | 149.473       | N4        | TUYGAX02       | 149.286       | O3        | LEWFAV         | 149.123       | O1        |
| HAWBEN         | 149.471       | N13       | HOSYOE         | 149.28        | N3        | CAGLAB         | 149.122       | N3        |
| CAVVIG         | 149.469       | O23       | CUWNOA         | 149.277       | O7B       | IREYOW         | 149.122       | O22       |
| MIGNUN         | 149.46        | O1        | FASWED         | 149.277       | O23       | TAXLIO         | 149.111       | O4        |
| MIVDEB         | 149.46        | O5        | DAPNAL         | 149.276       | O10       | OFUNOW         | 149.109       | O7        |
| BUZGUZ         | 149.446       | O4        | NOJPIN         | 149.275       | N5        | DATVUQ         | 149.105       | O5        |
| WIJDAV         | 149.436       | O5        | MAKSUN         | 149.275       | O10       | LMETZN         | 149.105       | O3A       |
| EVUJUD         | 149.435       | O7        | HIQVUZ         | 149.272       | O11       | ABAXIN         | 149.104       | S2        |
| SAMSIL         | 149.43        | O3        | AWUCUQ         | 149.264       | N7        | ACENIF         | 149.099       | O9M       |
| LITDAV         | 149.094       | O14B      | OHUTOC         | 148.934       | N3        | ZETKUG         | 148.747       | O11       |
| WEHGEY         | 149.093       | N3        | KOTTEU         | 148.929       | O7        | BOYXEU         | 148.743       | N4        |
| QENFAR         | 149.089       | O4        | MIYMUC         | 148.923       | O6        | CAGSAH         | 148.742       | O3        |
| NEZDEB         | 149.087       | O1        | UFEBIT         | 148.921       | O4        | IFIYIG         | 148.739       | O15       |
| TOKZIF         | 149.082       | O3        | PEGBEL         | 148.915       | O4A       | NOQCEE         | 148.738       | Cl4       |
| WENWUI         | 149.08        | N2        | GOKXOT         | 148.91        | S3        | SUVPEH         | 148.738       | O29       |
| REJXOX         | 149.078       | O2        | FUJNAB         | 148.907       | O3        | FIPKUM         | 148.728       | O13       |
| DEPYIH         | 149.076       | O12       | SUQGUH         | 148.905       | Cl3       | PONVIA         | 148.727       | O7        |
| OVIPAM         | 149.07        | N2        | ONIWAK         | 148.901       | O11A      | MIPYIU         | 148.724       | O4        |
| IRAFEN         | 149.063       | N3        | ELESIA         | 148.899       | N4        | WABFIP         | 148.723       | Cl3       |
| QUCYIX         | 149.059       | N17       | JUJQEK         | 148.893       | O13       | DAXGOA         | 148.721       | N3A       |
| GIXPAG         | 149.054       | O6        | OMOCOK         | 148.893       | S1        | ZEBKAS         | 148.72        | N6        |
| QITRET         | 149.052       | O5        | GERPID01       | 148.892       | O2A       | RALZUD         | 148.714       | O37       |
| UKEHOJ         | 149.05        | O25       | GAFMIK         | 148.891       | N4        | DAFYIW         | 148.71        | O9        |
| ABAXIN         | 149.049       | N1        | LAFXUP         | 148.891       | O6        | KIWZOJ         | 148.708       | O14       |
| ISEMEZ         | 149.049       | O40B      | SEHFAO         | 148.89        | N2A       | DIYXAK         | 148.706       | N1        |
| DUNXUH12       | 149.048       | O1        | WUXVOB         | 148.889       | O8        | VOTJOG         | 148.706       | O2        |
| FURDEB         | 149.041       | O20       | PENPAD01       | 148.888       | O10       | SANVOT         | 148.701       | N5        |
| KELTUR         | 149.041       | O6        | WIJDAV         | 148.885       | N4        | ECOFOT         | 148.7         | N5        |
| WOSBUB         | 149.04        | O4B       | LEMDIU         | 148.883       | N4        | HOPTIS         | 148.695       | N8        |
| QALHET         | 149.038       | O30       | ABOWUL         | 148.88        | O5        | EMEYUR         | 148.695       | O3        |
| URISOG         | 149.038       | O6        | FUJBOD         | 148.879       | O8        | XOQXEH         | 148.694       | O6        |
| AFIQUB         | 149.031       | O10       | PUSWAC         | 148.876       | F8        | GOHJEV         | 148.682       | O6        |
| BONVOQ         | 149.03        | O2        | DUNXUH13       | 148.874       | O1        | CAPWAU         | 148.679       | O9        |
| XAMSIQ         | 149.022       | O8        | JONNUY         | 148.863       | O1        | TUFTOF         | 148.679       | O7        |
| DEHPOX         | 149.006       | O2        | ALONEU         | 148.86        | N10       | PIBCEL         | 148.668       | N3        |
| TIVJIT         | 149.006       | O52       | YIMQES         | 148.859       | O10       | ACACZM         | 148.668       | O1        |
| ADECET         | 149.004       | O3        | JETGEY         | 148.857       | O3        | XACGUD         | 148.667       | O1        |
| XUSGUN         | 149.003       | O2        | AZUCIH         | 148.853       | O1B       | EKOZUA         | 148.656       | O2        |
| VOQTOM         | 149.003       | S1        | HIKKOC         | 148.835       | N1        | OHUQAJ         | 148.649       | O22       |
| ULAKIC         | 148.999       | I1        | KUBVIO         | 148.827       | O6        | YEQSOF         | 148.646       | N3        |
| NIPWIT01       | 148.996       | O6C       | REPQEM         | 148.819       | O8        | TEFKEV         | 148.645       | O4        |
| ONOPOX         | 148.995       | Cl3       | TEBDOT         | 148.813       | O1        | BOYXEU         | 148.644       | N5        |
| PIJKAV         | 148.995       | O16       | MIMSOS         | 148.811       | N11       | QUDKOQ         | 148.642       | O8        |

|                |               |           |                |               |           |                |               |           |
|----------------|---------------|-----------|----------------|---------------|-----------|----------------|---------------|-----------|
| RUNSOI         | 148.995       | O2        | XEPCOM         | 148.808       | O2        | RALZUD         | 148.638       | O34       |
| BAMWOD         | 148.993       | O7        | GIQZUF         | 148.804       | O4        | RORSEY         | 148.638       | O6        |
| <b>Refcode</b> | <b>∠YZnLB</b> | <b>LB</b> | <b>Refcode</b> | <b>∠YZnLB</b> | <b>LB</b> | <b>Refcode</b> | <b>∠YZnLB</b> | <b>LB</b> |
| DOMYUC01       | 148.983       | O3B       | FODMUJ         | 148.799       | O2A       | KAPBEJ         | 148.637       | O2        |
| CACKEA         | 148.975       | CI2       | FEDYEU         | 148.79        | O7        | CODVAV         | 148.628       | O10       |
| TEJFIA         | 148.975       | O8        | ULEPOS         | 148.788       | N4        | IZAPAD         | 148.628       | O6        |
| FUJBET         | 148.974       | O4        | GOVXEX         | 148.783       | N2        | AWECUB01       | 148.627       | O6        |
| FUPQOW         | 148.971       | O16       | SANVOT01       | 148.779       | N6        | HOPTIS         | 148.62        | N8        |
| TAZJAH         | 148.968       | O5        | MUFCAAT        | 148.778       | O9        | VOZCIY         | 148.619       | O5        |
| LOJFAT         | 148.959       | O9        | BOBHEF         | 148.777       | CI2       | WEMPAG         | 148.616       | N4        |
| ZIRNUM         | 148.959       | O12       | EMOTOQ         | 148.768       | O4        | CUHKUN         | 148.615       | CI1       |
| FAQFAI         | 148.95        | O17       | ZEJYAR         | 148.765       | N6B       | CAGLAB         | 148.612       | N16       |
| EBAWAH         | 148.948       | N6        | KARDEM         | 148.765       | O16       | NARKEA         | 148.61        | O5        |
| KOZLIX         | 148.946       | O4        | TIVJIT         | 148.759       | O46       | RUWMED         | 148.603       | O26       |
| KEDQER         | 148.944       | O9        | SOCGIB         | 148.758       | O5        | YUZQIV         | 148.598       | O6        |
| XIDHUP         | 148.943       | O7        | GIZFUT         | 148.749       | O18       | KETPAC         | 148.587       | N4        |
| FORWOA         | 148.581       | O21       | NAXVOB         | 148.442       | N3C       | OGUBAV         | 148.27        | N1        |
| CAHFOK         | 148.575       | O5        | TARYET         | 148.433       | O6        | VETNAK         | 148.263       | O4        |
| REHGAN01       | 148.566       | O8        | KADXAQ01       | 148.431       | CI5       | WUDBOO         | 148.26        | O75       |
| PUKYOM         | 148.564       | O12       | BEQVEA         | 148.429       | CI1       | PICBAE         | 148.259       | O13       |
| XINTAS         | 148.558       | N2        | TURMUP         | 148.428       | O2        | IQIBAN         | 148.255       | O20       |
| NOQCII         | 148.557       | CI4       | PAKVOM         | 148.424       | O4        | JENBEM         | 148.243       | N2        |
| OKENAW         | 148.556       | N2        | QOMFEF         | 148.424       | O44       | CEQJER         | 148.242       | O2        |
| MUJHOP         | 148.556       | O5        | GIXPIQ         | 148.42        | N18       | RUZQUY         | 148.242       | O2D       |
| USITUM         | 148.55        | N2        | ISEMEZ         | 148.415       | O7        | MAKYUS         | 148.235       | O7        |
| ISEMEZ         | 148.546       | O34       | KEHNIW         | 148.411       | O7        | RUSFOC         | 148.234       | N19       |
| OJUJIM         | 148.542       | N4        | SIPJIL         | 148.405       | O4        | VENTOB         | 148.234       | O5        |
| SEBBAF         | 148.537       | O18       | MAKHAH         | 148.399       | N16       | GIQFOF         | 148.232       | O8A       |
| PUYSUY         | 148.536       | O13       | CEYWEL         | 148.398       | CI7       | TEBDOT         | 148.229       | N3        |
| YOQYUZ         | 148.533       | O3A       | HAVZUA         | 148.393       | N6        | FASQUN         | 148.229       | O5        |
| ROQKIT         | 148.531       | O6A       | LAPZOV         | 148.393       | O1B       | WEWVOM         | 148.227       | O3        |
| CIDTOB         | 148.524       | N9        | PICBAE         | 148.392       | O13       | WEMZUJ         | 148.224       | O7        |
| QIJXUE         | 148.52        | O6        | FUPQOW         | 148.384       | O9        | UVUFAU         | 148.209       | O1        |
| GOVXEX         | 148.518       | O7        | RAHFIP         | 148.382       | O10D      | ISEMEZ         | 148.208       | O6        |
| DUFJUM         | 148.517       | O1C       | WUJRUP         | 148.377       | N17       | EBUBEL         | 148.204       | O4        |
| LICXAZ         | 148.517       | O8        | AXAVAZ         | 148.375       | O7        | SOTJAN         | 148.203       | O15       |
| JISNEF         | 148.515       | O1        | LUNBIF         | 148.374       | O5        | ZOXTAJ         | 148.199       | O11       |
| REHGAN         | 148.513       | O6        | OMUVUO         | 148.368       | O9        | CAYWEG         | 148.196       | O8        |
| YOCKUW         | 148.511       | CI1       | ZNETAM10       | 148.366       | I2        | IXOQAQ         | 148.195       | O5        |
| RECKOD         | 148.511       | S2        | SABGEI         | 148.366       | O22       | MULQOA         | 148.195       | O12A      |
| NORBUT         | 148.51        | O6G       | ZZZDVY02       | 148.364       | O1        | WEZJAN         | 148.195       | O4B       |
| XINTAS         | 148.506       | N4        | SASGOJ         | 148.362       | O6        | ZZZDVY04       | 148.191       | O1        |
| MOYNIA         | 148.506       | O6        | WENDEA         | 148.357       | O3        | ZINDAD         | 148.184       | O17       |
| COGLES         | 148.502       | O15       | BOSQIK         | 148.355       | O7        | ASUWUI         | 148.182       | O4        |
| FEWGIY         | 148.498       | N1        | BABXEL         | 148.351       | O5A       | KEYLEG         | 148.175       | O5        |
| EHEWIY         | 148.491       | N3        | RAFZIJ         | 148.347       | F12       | GIYHED         | 148.172       | O1A       |
| ZASWEY         | 148.489       | N7        | FEQVEE         | 148.345       | O1A       | FELPES         | 148.171       | O4        |
| WAQNAH         | 148.489       | O8        | UFEBIT01       | 148.34        | O4        | SOXVUY         | 148.17        | O5        |
| IHOCIT01       | 148.487       | O11       | CORCIX         | 148.332       | O6        | ROBQAB         | 148.166       | O9        |
| RUVHOF         | 148.485       | O2        | ZEBKAS         | 148.332       | O2        | NASJUO         | 148.163       | N3        |
| YOCKUW         | 148.48        | CI1       | QIDRII         | 148.331       | O5        | ULEXER         | 148.157       | O20       |
| FAVRUT         | 148.479       | O10       | QIDREE         | 148.327       | O6        | WEZNUM         | 148.154       | O6        |
| AGUJUI         | 148.478       | O4        | LMETZN01       | 148.326       | O1        | XEHFIC         | 148.151       | O5        |
| RUZQAE         | 148.476       | O6        | JOBYEG         | 148.322       | N6        | NUMTAS         | 148.147       | N4        |
| HUVHUD         | 148.472       | O3        | JIDWUR         | 148.32        | N16       | BUQZOD         | 148.147       | O2        |
| TAZJAH         | 148.472       | O2        | CAGLAB         | 148.31        | N7        | DEHFUR         | 148.147       | O3        |
| EQOVEL         | 148.47        | O4        | KUBZIR         | 148.305       | O6        | RAXNAH         | 148.141       | O9        |
| EQEJEQ         | 148.468       | O2A       | YONNUL         | 148.303       | O19       | OCOKUM         | 148.14        | O1        |
| ETOJII         | 148.466       | N1        | QOMTIV         | 148.302       | O2        | HAZYUE         | 148.138       | O2        |
| PUKYIG         | 148.46        | O11       | IFIXOK         | 148.3         | O13       | PUDBUN         | 148.136       | N3        |

|                |               |           |                |               |           |                |               |           |
|----------------|---------------|-----------|----------------|---------------|-----------|----------------|---------------|-----------|
| FEQVEE         | 148.456       | O5A       | CUNVAJ         | 148.298       | O10       | OJUHUV         | 148.133       | O5        |
| ROMQAN         | 148.454       | O7        | LERVOV         | 148.282       | O12       | XELNOS02       | 148.131       | O5        |
| <b>Refcode</b> | <b>∟YZnLB</b> | <b>LB</b> | <b>Refcode</b> | <b>∟YZnLB</b> | <b>LB</b> | <b>Refcode</b> | <b>∟YZnLB</b> | <b>LB</b> |
| ULOWOH         | 148.451       | O17       | KEBGIK         | 148.278       | N1        | XUGDEK         | 148.13        | N3        |
| UDABUX         | 148.446       | CI1       | ESIWEK         | 148.277       | O8B       | AWECUB         | 148.118       | O3        |
| LUNBIF         | 148.444       | O7        | UNIQEO         | 148.276       | O4B       | LASMEZ         | 148.117       | O20       |
| SOQDAE         | 148.109       | O5        | OHUQAJ         | 147.955       | O15       | HODZIU01       | 147.78        | N2        |
| ERIRAZ         | 148.106       | N2        | PIRFOL         | 147.954       | O4        | DUBMAR         | 147.772       | O4        |
| RORSEY         | 148.105       | O3        | UGEZOX         | 147.954       | O5        | TOTMIB         | 147.771       | O22       |
| JENBEM         | 148.104       | N3        | EPITF          | 147.949       | N2        | EFEBEA         | 147.77        | O6        |
| FUTYUQ         | 148.102       | O15       | NABROY01       | 147.949       | O7        | GERPID03       | 147.76        | O1A       |
| DIDTAP         | 148.096       | O1C       | HOKTUY         | 147.949       | S4        | LITHUU         | 147.76        | O9        |
| DAYPOK         | 148.094       | O4        | YAQQAK         | 147.948       | S2        | NERTEL         | 147.756       | CI1       |
| JETFUN         | 148.092       | O4        | PIRFOL01       | 147.944       | O4        | WARDUP         | 147.753       | O6        |
| ACACZM02       | 148.089       | O5        | GERPID02       | 147.933       | O1A       | ZEJSUF         | 147.752       | O4        |
| FUNBAU         | 148.088       | O9        | MAKSOI         | 147.914       | O5        | GASSUR         | 147.75        | O6        |
| SIZTEA         | 148.082       | N1        | DAFYIW         | 147.913       | N7        | QEPRUC         | 147.74        | O6        |
| AQOHAQ         | 148.078       | O3        | GERPID         | 147.91        | O1A       | EHUXOX         | 147.737       | O3        |
| XARZUN         | 148.077       | O16       | FAYROM         | 147.902       | N5        | GUCHAN01       | 147.733       | O4        |
| BIQHIU         | 148.076       | O2        | UDIDUI         | 147.902       | N4A       | WUBREQ         | 147.727       | O7        |
| BULFIZ         | 148.074       | CI1       | JENBIQ         | 147.898       | N2        | ZEYFIV         | 147.725       | O19       |
| LOCWAE         | 148.074       | O2        | HAWBEN         | 147.894       | N10       | XAXBIJ         | 147.722       | O1        |
| DODJAK         | 148.073       | O6        | JIDXEC         | 147.891       | N9        | CEQJER         | 147.717       | O18       |
| GAKQIV         | 148.071       | O4        | HULNOU         | 147.885       | O9        | XUQCOB         | 147.713       | CI2       |
| EQUFON         | 148.063       | N7        | LINYIQ         | 147.882       | O1        | HUXDUC         | 147.712       | O14       |
| MOJKAY         | 148.063       | O3        | QIFKUP         | 147.873       | O3B       | EKOZUA         | 147.707       | O7        |
| KADXAQ         | 148.062       | CI7       | LAQJEV         | 147.872       | O4        | GIXPIQ         | 147.706       | N10       |
| REXKIO         | 148.06        | CI2       | PEKTEG         | 147.869       | O14       | VOWXUC         | 147.705       | N3        |
| DOSVAJ         | 148.057       | O2        | IJIVIH         | 147.856       | N1        | TOPYEE         | 147.702       | N3        |
| GAFMIK         | 148.054       | N12       | WARFAX         | 147.853       | O6        | SOXTUW         | 147.699       | O21       |
| KIJKAS         | 148.052       | O7        | UHAZAE         | 147.849       | S2        | NIDMOD         | 147.698       | O7        |
| SOFFEA         | 148.05        | O2        | GOCMIW         | 147.847       | O7        | TOLMUF         | 147.698       | O5        |
| HEZFEE         | 148.048       | CI13      | PUMGOV         | 147.84        | N5        | YUBZAX         | 147.689       | O2        |
| KIGJAP         | 148.045       | CI1       | RAGXUU         | 147.84        | CI1       | NAKTOM         | 147.688       | O4        |
| YEKWOE         | 148.043       | N4        | CAFSEJ         | 147.836       | O9        | SUVPEH         | 147.685       | O26       |
| XUGDEK         | 148.034       | O7        | PERNUW         | 147.834       | N3        | IDUFUL         | 147.682       | O8        |
| FAYROM01       | 148.033       | N1        | ACUGUD         | 147.83        | N3        | WENPIO         | 147.68        | O6        |
| EYERAB         | 148.029       | O8        | LIWXEV         | 147.83        | O6D       | NOQCOO         | 147.675       | CI4       |
| GICLUB         | 148.024       | O29       | BUWCEE         | 147.828       | O6        | UQEDIE         | 147.675       | O4D       |
| ROBQAB         | 148.013       | O10       | LETROV         | 147.825       | F4        | IJOYEN         | 147.673       | O10       |
| RIPSAO         | 148.009       | O5        | LAHRET         | 147.815       | O3        | BEQPAQ         | 147.672       | O2        |
| SEBBAF         | 148.009       | O18       | QOXROL         | 147.814       | N2        | WAZVOM         | 147.67        | O4B       |
| LIJREC         | 148.003       | O7        | NAHHOV         | 147.814       | CI4       | DAYPOK         | 147.66        | O5        |
| GIQFOF         | 147.99        | O6A       | WEMZUJ         | 147.813       | O3        | TAYFIJ         | 147.657       | N2A       |
| PEGBEL         | 147.989       | O1G       | EHUXOX         | 147.81        | O2        | DOHBEI         | 147.657       | O4        |
| SEBBAF         | 147.989       | O24       | FIQRUT         | 147.804       | O12       | KENJUK         | 147.653       | O2        |
| XELNOS01       | 147.989       | O5C       | VIRLAK         | 147.803       | O88       | NARKEA         | 147.64        | N8        |
| IWORET01       | 147.981       | O4        | SEBBAF         | 147.798       | O6        | GIQZEP         | 147.64        | O5        |
| POMRIT         | 147.979       | O3        | XELNOS         | 147.798       | O5C       | QEDTUR         | 147.639       | S2A       |
| YEQSOF         | 147.976       | O7        | NEYBID         | 147.795       | O3        | OWUHOF         | 147.636       | O21       |
| XEFPII         | 147.975       | O7        | SADFAH         | 147.793       | O3        | AXOCEW         | 147.634       | O5        |
| RANQAA         | 147.973       | O6D       | MAZLOO         | 147.786       | O14       | NIXQOB         | 147.629       | N4B       |
| MINBAM         | 147.972       | N2C       | RENXOZ         | 147.783       | O3C       | OXPAZN         | 147.628       | O10       |
| BEWBAL         | 147.971       | O4        | YUTTEN         | 147.782       | O5        | AGAWUA         | 147.624       | O10       |
| NEPMIF         | 147.967       | O5B       | GEHYEB         | 147.78        | N4        | EFASUA         | 147.62        | O15       |
| LIMDOE         | 147.612       | O2        | QETFIF         | 147.448       | O4        | ZODGEH         | 147.274       | O1        |
| FIHYOM         | 147.604       | N2        | OSACIX         | 147.447       | O3        | HITVOZ         | 147.273       | O13       |
| KUBSIK         | 147.598       | O3A       | UDACEH         | 147.44        | CI2       | XAYKOY         | 147.272       | N3A       |
| SOFWAM         | 147.597       | O7        | SEZMIW         | 147.432       | O4        | MULKOT         | 147.272       | O10       |
| OFUNOW         | 147.596       | O8        | ROWBEM         | 147.429       | N2        | PUNQOF         | 147.269       | O7        |



|                |               |           |                |               |           |                |               |           |
|----------------|---------------|-----------|----------------|---------------|-----------|----------------|---------------|-----------|
| ZENHEI         | 147.592       | O1        | IVUTOJ         | 147.427       | O38       | SEGDIT         | 147.261       | N5        |
| JAMVOM         | 147.584       | O10       | LERNAZ         | 147.427       | O8        | EYURUN         | 147.259       | O9        |
| <b>Refcode</b> | <b>∠YZnLB</b> | <b>LB</b> | <b>Refcode</b> | <b>∠YZnLB</b> | <b>LB</b> | <b>Refcode</b> | <b>∠YZnLB</b> | <b>LB</b> |
| DIMKAN         | 147.583       | O11       | NUHYAR         | 147.426       | O3C       | NAMGOY         | 147.255       | N7A       |
| YACSEC         | 147.572       | O42       | QARVIP         | 147.425       | O6        | TAMZEQ         | 147.249       | O12       |
| ZIHWIZ         | 147.562       | F23       | MOLQAF         | 147.424       | N10       | YEFKAY         | 147.247       | O2        |
| XUXPAI         | 147.549       | F1        | LOGZAK         | 147.424       | O1        | QORKIR         | 147.245       | O16       |
| SOXTAC         | 147.548       | O21       | FAMBIG         | 147.422       | O3        | DOHPAT         | 147.237       | N1        |
| MAVZEP         | 147.547       | N1        | MUNLEO         | 147.415       | S1        | KEMKET         | 147.215       | O11       |
| WUPTAE         | 147.547       | O6        | WAMZAN         | 147.404       | O2C       | COTJUT         | 147.214       | O2        |
| NEMTUV         | 147.544       | O6        | MEJMAT         | 147.397       | O3A       | UJEYIT         | 147.214       | O10       |
| MALFOU         | 147.537       | O9        | RAFZUV         | 147.393       | O2        | LUWTAY         | 147.212       | N3        |
| MUJQAL         | 147.533       | O1        | EFASUA         | 147.392       | O14       | SOKZOJ         | 147.21        | O14       |
| KUZLOI         | 147.529       | O9        | QAVBIA         | 147.389       | O5B       | PAVZES         | 147.206       | O5        |
| HIQMUR         | 147.527       | O11       | MAQKOH         | 147.385       | N10B      | HUXDUC         | 147.205       | O5        |
| IDAVAN         | 147.524       | N6        | DIFVIB         | 147.379       | O12       | QUIZAZ         | 147.202       | O1        |
| SOWCOY         | 147.521       | O2C       | BOMZEL         | 147.377       | O8        | DAGYEQ         | 147.196       | O5        |
| GOJWIM         | 147.518       | O12       | UZOKUR         | 147.377       | O8D       | OFUGAY         | 147.196       | O7        |
| ULIBOG         | 147.516       | O5        | IVAZUA01       | 147.374       | O4        | OCEYEB         | 147.194       | O7        |
| PIDMEV01       | 147.512       | O8        | VIRLAK         | 147.372       | O45       | EHOLUJ         | 147.193       | O1        |
| ZZZDVY03       | 147.512       | O1        | ZIHWIZ         | 147.368       | F1        | REGQUT         | 147.187       | O8        |
| NAMGOY         | 147.509       | N3A       | CAKSEO         | 147.363       | O5        | TARWUF         | 147.187       | O3        |
| VEHLUQ         | 147.508       | O30       | MUZVOS         | 147.356       | O26       | OPOLUC         | 147.186       | N4        |
| SENJEB         | 147.506       | O2C       | SAHFEN         | 147.356       | O12       | RAMDOZ         | 147.186       | N3        |
| FIMVUT         | 147.503       | S5        | DUWJUC         | 147.355       | O10       | UPOZEG         | 147.184       | N1        |
| GICLUB         | 147.501       | O22A      | GUVSEW         | 147.354       | N2        | RADMEQ         | 147.183       | N2        |
| HAHCIF         | 147.497       | O5        | FONPUV         | 147.354       | O9        | JOBYEG         | 147.183       | O3        |
| NEMVAD         | 147.492       | O1        | PIDTOO         | 147.354       | O7        | BUBSOJ         | 147.18        | O4        |
| IYOBUV         | 147.487       | O2        | GIQZEP         | 147.344       | N3        | IQUMIQ         | 147.171       | O7        |
| MAJDUY         | 147.482       | I1        | PETFON         | 147.343       | O9A       | IDOXUU         | 147.171       | S1        |
| EVUSEU         | 147.481       | O5        | QUKRAS         | 147.343       | O2        | PENPAD         | 147.166       | O10       |
| POFCUJ         | 147.48        | O2        | HIJSOI         | 147.342       | O2        | MEGNUK         | 147.161       | O4F       |
| SIJHUR         | 147.473       | O2        | DAGYEQ         | 147.341       | O5        | QOXREB         | 147.153       | N2        |
| DELTIY         | 147.472       | O3        | BUBSOJ         | 147.34        | O6        | YEQXEA         | 147.15        | O2        |
| TATZEX         | 147.467       | N1A       | KIJKAS         | 147.327       | O3        | MAKSUN         | 147.148       | O10       |
| ZOZYUK         | 147.466       | O5        | OFUGAY         | 147.318       | O30       | VEKGUR         | 147.144       | CI5       |
| IPOSEO         | 147.465       | N4        | NACZIE         | 147.317       | O8        | NAKTOM         | 147.144       | O6        |
| CIKQEW         | 147.465       | O4        | XUGBOR         | 147.308       | O1        | HOPLOQ         | 147.141       | N9        |
| VIRLAK         | 147.464       | O81       | IDEFII         | 147.295       | O9        | ZAQXEX         | 147.141       | O4        |
| JOBPUL         | 147.463       | N2        | YEFVAI         | 147.295       | O7        | ITIBAO         | 147.14        | O2        |
| TAHFEO         | 147.457       | N3        | ACUGUD         | 147.28        | N2        | TUXMIL         | 147.14        | O11       |
| QIBYEJ         | 147.454       | CI3       | POKQIS         | 147.28        | O5        | GAPDAE         | 147.138       | O4        |
| SIYSUQ         | 147.452       | O10       | PERZAN         | 147.279       | O8        | SUWZOC         | 147.136       | O18       |
| AJIGEG         | 147.45        | O25       | FISCEQ         | 147.277       | O14       | IRUVUP         | 147.135       | O6        |
| DEFJII         | 147.448       | O5        | CIDTOB         | 147.275       | N6        | HEHVOI         | 147.131       | N1        |
| WIHMIK         | 147.118       | O12       | ICOSIF         | 147.002       | O9        | UQENAG         | 146.824       | N5        |
| NUPDAE         | 147.113       | N9        | BEMHEI         | 146.997       | O15       | WIPSUJ         | 146.821       | O3        |
| CACBEQ         | 147.111       | O10       | KUJNUB         | 146.996       | O8        | GIXPIQ         | 146.818       | N21       |
| KUBTEH         | 147.11        | O20       | BEMHEI         | 146.992       | O9        | CAMPOY         | 146.817       | O1        |
| OYOWIL         | 147.109       | N17       | OPIRAJ         | 146.981       | O16       | YENSEQ         | 146.816       | O2        |
| BONVOQ         | 147.109       | O2        | FECHIG         | 146.98        | O3        | UXOXEM         | 146.813       | N10       |
| FUPQOW         | 147.108       | O19       | IQIZUD         | 146.979       | N2A       | ATOWUE         | 146.806       | O30       |
| JOYZEE         | 147.108       | O6        | JETFUN         | 146.979       | O8        | PIJGUM         | 146.805       | N4        |
| DIHNEO         | 147.107       | O8        | CAQHAF         | 146.977       | O49       | NESGAU         | 146.8         | O4E       |
| FONPUV         | 147.105       | O9        | FAHJAB         | 146.971       | O2E       | GIZFAZ         | 146.798       | O16       |
| ECAVAF         | 147.102       | N7        | TAZJAH         | 146.97        | O12       | DINTAX         | 146.786       | N5        |
| SUSPOL         | 147.101       | O5        | DUJWEN         | 146.961       | O4        | XECFUI         | 146.78        | O3A       |
| SIJDOF         | 147.097       | O8A       | NOVQOH         | 146.951       | O9        | UZOCUK         | 146.779       | O3G       |
| FODXAA         | 147.096       | O10       | KEPPII         | 146.947       | S1        | FAMBIG         | 146.775       | O1A       |
| TADCUA         | 147.088       | O5C       | FOJVUX         | 146.934       | O8        | DEJLIO         | 146.769       | O15       |

|                |               |           |                |               |           |                |               |           |
|----------------|---------------|-----------|----------------|---------------|-----------|----------------|---------------|-----------|
| PEBNIV         | 147.086       | O2D       | ZEYFIV         | 146.932       | O20       | CEYSEF         | 146.764       | O8        |
| GUCQIH         | 147.084       | O8        | ULAPAZ         | 146.93        | CI2       | PEFEX          | 146.76        | O3        |
| <b>Refcode</b> | <b>∠YZnLB</b> | <b>LB</b> | <b>Refcode</b> | <b>∠YZnLB</b> | <b>LB</b> | <b>Refcode</b> | <b>∠YZnLB</b> | <b>LB</b> |
| CISCEO         | 147.083       | CI1       | FUPQOW         | 146.926       | O22       | VAZZII         | 146.755       | O21       |
| HEZFEY         | 147.077       | CI7       | ETUQEQ         | 146.924       | O1A       | XUQZAK         | 146.749       | CI1       |
| OPICOI         | 147.073       | O19       | ECAJAV         | 146.921       | N5        | NILRAF         | 146.749       | O3        |
| BEMHAE         | 147.072       | O11A      | NAKPUM         | 146.916       | O11       | ACIKAA         | 146.743       | O4        |
| SIJLED         | 147.07        | O8        | VIRNUG         | 146.915       | N2        | JIDWUR         | 146.741       | N10       |
| FORWOA         | 147.069       | O13       | NAHGIO         | 146.911       | O17       | HOKQED         | 146.738       | O1        |
| BUBJAM         | 147.067       | N16       | MURJIV         | 146.908       | N8        | CAGLAB         | 146.727       | N10       |
| CUJFOF         | 147.064       | CI1       | SIJLIH         | 146.9         | O3        | GILFUF         | 146.718       | O2E       |
| YEFKAY01       | 147.062       | O3        | PIJKAV         | 146.897       | O13       | LAKPIY         | 146.718       | O2        |
| MOFWUA         | 147.06        | O1        | XIQFIO         | 146.895       | O9        | XOZKAY         | 146.717       | O10       |
| ROBCEQ         | 147.055       | O24       | NOPLUC         | 146.894       | N2        | YEYFIT         | 146.716       | O10       |
| TEXRUM         | 147.054       | CI2       | JENBIQ         | 146.893       | N3        | FISDIY         | 146.715       | O2        |
| DEZCIW         | 147.051       | N1        | NIXKEM         | 146.89        | O1J       | DEFHUT         | 146.711       | N8        |
| FUJNAB         | 147.051       | O4I       | WIPCAB         | 146.889       | N6        | IYUVOP         | 146.711       | N2        |
| JOBYEG         | 147.05        | N9        | QEPRUC         | 146.889       | O6F       | CAMPOY         | 146.71        | S1        |
| MOJTAH         | 147.048       | O1        | FAHMUY         | 146.886       | N4A       | VIRNUG01       | 146.708       | N2        |
| JIWCAW         | 147.045       | N14B      | ZAWTOI         | 146.884       | O3        | WEYMOE         | 146.708       | O1        |
| JEMYAE         | 147.041       | O3        | YOLVED         | 146.882       | O4        | WUJRUP         | 146.706       | N15       |
| NAHJEN         | 147.037       | O15       | IRUVUP         | 146.881       | O4        | SOTCAF         | 146.702       | S3A       |
| FIRPOO         | 147.032       | N3        | XEFPII         | 146.881       | O1        | QORLEO         | 146.701       | O4        |
| FURDEB         | 147.03        | O15       | JEMXUX         | 146.877       | O4        | IFOKAP         | 146.699       | N14       |
| KIFVOM         | 147.027       | CI3       | IVODEC         | 146.869       | O3A       | IHEMUF         | 146.698       | N5        |
| QEKNAZ         | 147.027       | O1        | WUWGON         | 146.868       | O2        | HUBZAG         | 146.693       | CI4       |
| PUGTOC         | 147.022       | N7        | DOVHEB         | 146.867       | O9        | GIZFAZ         | 146.692       | O14       |
| VIGFAW         | 147.02        | O9A       | QAKLEU         | 146.864       | O6        | RERKUW         | 146.692       | O8        |
| UTAZIB         | 147.018       | O1        | UNECUN         | 146.862       | O3B       | PAGSUP         | 146.689       | O3G       |
| OXUYIR         | 147.015       | O5        | SIYGAK         | 146.861       | O1        | JEQSIL         | 146.677       | S1        |
| XEJKIJ         | 147.012       | O2        | YAYQOG         | 146.859       | O66       | PAYCAX         | 146.676       | O7        |
| TOLMUF         | 147.01        | O4        | EVURUJ         | 146.856       | N3        | FUBNOH         | 146.674       | O1E       |
| UGIPAC         | 147.008       | N13       | XEHYAM         | 146.848       | O10       | SUWBOC         | 146.674       | O3        |
| FAKHOQ         | 147.006       | O10       | SOGNAG         | 146.841       | N8        | SIJREJ         | 146.667       | O4        |
| HEHMOY         | 147.004       | S6        | RERKUW         | 146.841       | O10       | XOMHIQ         | 146.662       | N2        |
| YIHPAI         | 146.657       | S4        | ETANOD         | 146.489       | O2A       | PIRFOL         | 146.344       | O13       |
| BIBGOJ         | 146.655       | N5        | SETRIV         | 146.488       | N1        | YUTGIF         | 146.344       | O5        |
| NAFYAX         | 146.655       | O2        | XALXIS01       | 146.485       | N2C       | SIDHET         | 146.343       | CI2       |
| XUXQEN         | 146.655       | F4        | RERKUW         | 146.485       | O1        | BUJBOA         | 146.339       | O8        |
| VIVXOO         | 146.654       | O1        | EHUXOX         | 146.478       | O1        | SARCUN         | 146.333       | O11       |
| DARNIV         | 146.653       | O16       | PIBCAH         | 146.475       | O7        | YUMJUO         | 146.315       | O1        |
| GIKQEA         | 146.645       | O9A       | RUWMUT         | 146.472       | O24       | MOKYAO         | 146.308       | O1A       |
| JAJPIU         | 146.645       | O10       | AWECUB01       | 146.469       | O5        | PEPHID         | 146.307       | N2        |
| LAYLAB         | 146.637       | O2        | JABDID         | 146.465       | N2        | ZUFQIC         | 146.305       | O6        |
| OBOHAS         | 146.633       | O13       | ZAQXEX         | 146.459       | O2        | YUMJUO         | 146.295       | O4        |
| MEGNUK         | 146.63        | O5C       | WAVDAY         | 146.457       | N2        | RICNAU         | 146.294       | O2        |
| NOQDEE         | 146.629       | S1        | ALALEG         | 146.454       | F1        | CACBEQ         | 146.292       | O4        |
| OXOXEG         | 146.626       | O4        | IPUKIQ         | 146.45        | O7        | EYEDIY         | 146.279       | O7        |
| QUCZUK         | 146.614       | CI3       | MEJSIG         | 146.448       | O4        | WEXHUF         | 146.278       | O8B       |
| LIDWAA         | 146.614       | O7        | MUHVIW         | 146.446       | O2B       | NIPWIT         | 146.276       | O4A       |
| DAJKAB         | 146.611       | CI1       | NACZEW         | 146.443       | O15       | GLYZNS10       | 146.275       | N2        |
| MUDFEW         | 146.609       | O4        | MOWLER         | 146.442       | N1D       | BUNNOQ         | 146.268       | O5        |
| MATYOX         | 146.604       | N4        | YOXMIK         | 146.441       | CI4       | NIPWIT01       | 146.268       | O4A       |
| HEJNOD         | 146.601       | N1        | DUGYOU         | 146.44        | N2        | MUDKOM         | 146.261       | O6        |
| VEGLUQ         | 146.595       | O13       | YUMJOI         | 146.438       | O2        | DOSTUB         | 146.26        | O2        |
| XAGQAZ01       | 146.594       | O2        | RUGXEZ         | 146.43        | O21       | KARXOR         | 146.257       | O5        |
| RECKIX         | 146.588       | O3        | SASVIT         | 146.424       | O2        | FISDIY         | 146.252       | O7        |
| GUBFAK         | 146.586       | O2        | DIYXEO         | 146.423       | N4        | GIXDOH         | 146.252       | O8        |
| BOCRIX         | 146.583       | O8        | YUXRIU         | 146.42        | O7        | WIBHAS         | 146.249       | N2        |
| QUMJOZ         | 146.58        | O1        | BASFEJ         | 146.417       | O5        | WIBHAS         | 146.249       | N4        |

|                |               |           |                |               |           |                |               |           |
|----------------|---------------|-----------|----------------|---------------|-----------|----------------|---------------|-----------|
| VUDMAK         | 146.576       | O12       | LETRIP         | 146.413       | O1        | CUJFOF         | 146.246       | O5        |
| PUDBUN         | 146.571       | N12       | KAPBEJ         | 146.412       | N9        | EBAWAH         | 146.244       | O11       |
| <b>Refcode</b> | <b>∠YZnLB</b> | <b>LB</b> | <b>Refcode</b> | <b>∠YZnLB</b> | <b>LB</b> | <b>Refcode</b> | <b>∠YZnLB</b> | <b>LB</b> |
| AZUCIH         | 146.567       | O2        | NIQLAC         | 146.408       | F1        | WITCOR         | 146.22        | O1        |
| XAGQAZ         | 146.566       | O8        | MAQLEY         | 146.407       | O1        | EBAWAH         | 146.219       | O10       |
| UNOKIS         | 146.559       | O7        | WEXFIQ         | 146.401       | O6        | GUPBOK         | 146.218       | O1        |
| GIWHEA         | 146.558       | N5        | YUTGIF         | 146.398       | N1        | TOJLIN         | 146.217       | F9        |
| XULFEQ         | 146.558       | O4        | YUMJOI         | 146.397       | O3        | SEBBAF         | 146.215       | O20       |
| XUQHOH         | 146.555       | O11       | JABDID         | 146.392       | N1        | IBUSUW         | 146.213       | CI3       |
| EMOQIH         | 146.55        | O15       | OPIDAV         | 146.385       | O16       | DOVHAX         | 146.212       | O10       |
| TITRIY         | 146.55        | O7        | RAFQEV         | 146.383       | O7        | LAXFUP         | 146.207       | CI1       |
| IQIZUD01       | 146.549       | N2C       | SARXAO         | 146.373       | O5        | UJAPOL         | 146.205       | O3        |
| ZOGNER         | 146.549       | O1        | PUDBAT         | 146.372       | N12       | DUPRAI         | 146.202       | O3B       |
| TAQTOV         | 146.545       | N2        | COTJUT         | 146.37        | O5        | IVEQAB         | 146.2         | N4        |
| FACLI02        | 146.542       | O1        | IFIZOM         | 146.37        | O1        | WEZJAN         | 146.199       | O2B       |
| NENXIQ         | 146.537       | O10       | OJUHUW         | 146.367       | S1        | OXUYIR         | 146.183       | O5        |
| FACLII         | 146.532       | O5        | EWUPOC         | 146.364       | I1E       | ODEPAR         | 146.178       | N1        |
| ADEVOV         | 146.528       | O2A       | HEJNOD         | 146.361       | N7        | CISMAU         | 146.164       | N4        |
| UGOQUE         | 146.523       | O9        | RERKUW         | 146.357       | O12       | BEMZEC         | 146.164       | O7        |
| RIHDUJ         | 146.522       | O3        | SOXQEE         | 146.355       | O2B       | BUBHUE         | 146.162       | N14       |
| MULKOT         | 146.518       | O10       | FAXCUF         | 146.352       | O1        | KARDEO         | 146.157       | O6        |
| CEWCAJ         | 146.505       | O5        | TUJVUS         | 146.351       | N1        | JISYIX         | 146.156       | O2        |
| NHBZZN10       | 146.499       | O3B       | PIRFOL01       | 146.35        | O13       | AWECUB         | 146.15        | O4        |
| QENZAK         | 146.493       | O7        | VEGMAX         | 146.349       | O13       | YUCBEE         | 146.15        | O9        |
| UGIPAC         | 146.489       | N9        | AJIGEG         | 146.346       | O7        | NEPPAZ         | 146.137       | O2        |
| XIGMEH         | 146.136       | N3        | NOVWON         | 145.99        | O8        | NOVWON         | 145.839       | O3B       |
| ROGMEG         | 146.136       | O5D       | SIYFOX         | 145.987       | O1        | HOQJUS         | 145.837       | N1        |
| UWUVEO         | 146.133       | F10       | NIJWAE         | 145.985       | N6        | LIRNOR         | 145.837       | O9        |
| IZOWEA         | 146.125       | O4        | FIHYOM         | 145.983       | N2        | KARDEO         | 145.832       | O5        |
| HOJJIC         | 146.123       | O6        | SETRAN         | 145.983       | N2        | PENPAD         | 145.828       | O9        |
| QIPLAE         | 146.123       | O7        | CEPBOR         | 145.981       | O5C       | QUCYUJ         | 145.825       | N4        |
| SIZPOJ         | 146.122       | O5        | HECWOD         | 145.98        | O4        | EPEHOZ         | 145.825       | F2        |
| WULQAX         | 146.117       | O7        | DAYZEK         | 145.979       | N6        | PUDBIB         | 145.824       | N3        |
| DASQAQ         | 146.113       | O24       | KASQUS         | 145.977       | O14       | NOBHIX         | 145.822       | O2        |
| HEJDEJ         | 146.11        | N6A       | XESBIS         | 145.976       | N4        | XEGJIF         | 145.822       | O9        |
| IRINON         | 146.107       | CI1       | FISCEQ         | 145.975       | CI1       | DAGXOZ         | 145.821       | O8        |
| MALFOU         | 146.098       | O6        | XAFLOG         | 145.972       | O19       | VETNAK         | 145.819       | N3        |
| WIHMIK         | 146.082       | S2        | YILXAT         | 145.962       | O5        | TUQWEK         | 145.818       | N1        |
| ONAVAB         | 146.079       | O1        | BUBJAM         | 145.957       | N9        | IHEMUF         | 145.816       | O6        |
| ZOJXIH         | 146.078       | N2        | KENJUK         | 145.957       | O3        | WIRCUX         | 145.813       | F4        |
| SUVPEH         | 146.069       | O21       | FOCNET         | 145.956       | O8        | ZINWUO         | 145.8         | O2        |
| FAXDAM         | 146.066       | O8B       | YUVWOB         | 145.954       | O1        | ZINWUO10       | 145.8         | O2        |
| HURFOR         | 146.066       | O11       | NAQLAT         | 145.953       | O16       | GICTAN         | 145.788       | O10       |
| SETRIV01       | 146.061       | N1        | PETFON         | 145.951       | O2        | CEPLUF         | 145.787       | O4        |
| FAHMIM         | 146.061       | O6        | ZERVIE         | 145.951       | S2        | EDUBEM01       | 145.787       | O2        |
| PENPAD01       | 146.059       | O7        | BABBAI         | 145.95        | N14       | QORJIQ         | 145.782       | N6        |
| GUQTOB         | 146.056       | O9        | UYUBAS         | 145.937       | O3A       | QOMFEF         | 145.778       | O48       |
| PIBLAQ01       | 146.054       | O2A       | WUJRUP         | 145.931       | N8        | KAMTID         | 145.775       | N6D       |
| BABBAI         | 146.051       | N13       | XALXIS         | 145.929       | N2C       | NACZIE         | 145.775       | O7A       |
| SOGNAG         | 146.049       | N7        | HOWXOH         | 145.928       | O8        | LIHXUX         | 145.774       | O9        |
| LINVOW         | 146.046       | F7        | GASRIE         | 145.926       | O2A       | RALZUD         | 145.768       | O29       |
| HIYXIZ         | 146.045       | O8        | JELNUM         | 145.925       | O8        | MAVNUU         | 145.766       | O3        |
| WAZVOM         | 146.045       | O10       | ULEXER         | 145.923       | O1        | CESQUP         | 145.759       | O5F       |
| XAFLOG         | 146.044       | O19       | QAHVUS         | 145.921       | O8        | MEHZUU         | 145.757       | O1        |
| HEFRES         | 146.043       | O2A       | EXETIN         | 145.919       | N6        | BEQPAQ         | 145.756       | O7        |
| PIBLAQ         | 146.038       | O2A       | MUZVUY         | 145.917       | CI2       | JUFSAG         | 145.755       | N4        |
| UWADUT01       | 146.036       | O9        | JUJQEK         | 145.909       | O11       | PILCIZ         | 145.751       | N4        |
| AWUCUQ         | 146.032       | N3        | NOPCUQ         | 145.906       | O4        | YIHHIJ         | 145.746       | F2        |
| HEJDEJ         | 146.027       | N5A       | LEKNUN         | 145.895       | O3G       | GAYZOV         | 145.745       | N2        |
| QANTIJ         | 146.024       | O2        | LAGVEX         | 145.887       | N8        | PEZLOY         | 145.745       | N2A       |

|                |               |           |                |               |           |                |               |           |
|----------------|---------------|-----------|----------------|---------------|-----------|----------------|---------------|-----------|
| GUVFUY         | 146.016       | N12       | RUWMON         | 145.884       | N17       | JIVNUB         | 145.744       | N5        |
| LAVWIO         | 146.015       | CI1       | REYCIJ         | 145.881       | O3        | FOTBUO         | 145.74        | O13       |
| <b>Refcode</b> | <b>∠YZnLB</b> | <b>LB</b> | <b>Refcode</b> | <b>∠YZnLB</b> | <b>LB</b> | <b>Refcode</b> | <b>∠YZnLB</b> | <b>LB</b> |
| ZEPPOC         | 146.012       | O5        | EPEYAA         | 145.879       | O5        | OKIJAW         | 145.738       | O9        |
| SUPLAR         | 146.011       | O5        | XIYGIV         | 145.879       | O3        | DEJLIO         | 145.734       | O17       |
| RUWMON         | 146.009       | O17       | DUGYOU         | 145.876       | O14       | GUBQOM         | 145.731       | N4        |
| AMUWOV         | 146.004       | CI4       | QEXVOH         | 145.874       | O3        | DAWQOK         | 145.717       | O9        |
| KIDWUQ         | 146.002       | N4B       | PEJWUX         | 145.873       | O7        | JETFUN01       | 145.714       | O3        |
| OZOQAX         | 146.001       | O10       | IJEDIL         | 145.87        | O15       | LOLRUC         | 145.712       | N2        |
| WIHMIK         | 146.001       | S1        | HINJUK         | 145.866       | O3        | CUBYIJ         | 145.711       | O33       |
| NIQMEH         | 146           | O1A       | FURDEB         | 145.856       | O23       | NIDMOD         | 145.711       | O8        |
| YODDAZ         | 146           | O3        | ICOLUK         | 145.849       | O6        | GIYHED         | 145.71        | O4A       |
| TUMQOJ         | 145.997       | O11       | LALTAV         | 145.844       | O8        | IJIVIH         | 145.71        | S2        |
| XOVXIQ         | 145.996       | O6        | LEKNUN         | 145.84        | O2A       | XINTAS         | 145.7         | O2        |
| VUDMUE         | 145.991       | O12       | VETNAK01       | 145.839       | N3        | DEDYES         | 145.693       | O7        |
| GARWIH         | 145.69        | O10       | ONAKUL         | 145.52        | O7        | FONPAZ         | 145.376       | O6        |
| TISBIG         | 145.69        | O6        | SARCIA         | 145.518       | N12       | WIRHUD         | 145.373       | O1        |
| MAPNAW         | 145.683       | O5A       | GUQLUA         | 145.515       | O47       | EDUBEM         | 145.372       | O5        |
| WANFUO         | 145.679       | N1A       | HOTNIQ         | 145.504       | O15       | NENBUF         | 145.372       | O24       |
| MEMPAV         | 145.677       | O8        | OWUJEX         | 145.502       | O10       | JUCKIE         | 145.37        | O4        |
| JEXQEJ         | 145.675       | O11       | OSAXIQ         | 145.499       | O3E       | LARRUT02       | 145.357       | O2        |
| COVQIQ         | 145.673       | O3        | HOPMAD         | 145.497       | S3        | UJAPOL         | 145.356       | O8A       |
| REGROO         | 145.672       | N1        | FASWED01       | 145.496       | O12       | BEYLAW         | 145.354       | O2        |
| MUZVOS         | 145.658       | O25       | NOMQAJ01       | 145.496       | O1A       | LMETZN01       | 145.353       | N1        |
| EBITUG         | 145.648       | O5B       | JIWKOQ         | 145.494       | N23       | MODHOD         | 145.349       | N1A       |
| LODNOK         | 145.642       | N8        | MAPNAW         | 145.494       | O7A       | HEHLOY         | 145.346       | O2D       |
| HEXGOI         | 145.638       | O8        | IBICOL         | 145.488       | O1D       | ZASVUN         | 145.343       | N2        |
| JAHZOI         | 145.638       | O2        | AGOKAK         | 145.479       | O3        | TOBRIO         | 145.343       | O6        |
| ZIHWIZ         | 145.633       | F6        | MIGXOS         | 145.479       | O4        | QUCYUJ01       | 145.341       | N3        |
| XUXQAJ         | 145.632       | O9        | QOVSAZ         | 145.479       | O5        | DAFYIW         | 145.341       | O10       |
| JONNUY         | 145.63        | CI1       | YUZQIV         | 145.479       | O5        | FEBFAU         | 145.341       | O3        |
| KASQUS         | 145.63        | O12       | ZEFXUF         | 145.477       | O6        | XAPNOT         | 145.332       | N1A       |
| PEJWUX         | 145.628       | O13       | OJUJIM         | 145.466       | N7        | XUCHAF         | 145.332       | O2        |
| TUFLOW         | 145.613       | N3        | DAWQIE         | 145.459       | O10       | BEQSUL         | 145.324       | O6        |
| NOGWIR         | 145.613       | CI3       | ROBCEQ         | 145.458       | O38       | WAVDAY         | 145.322       | O3        |
| NOMQAJ         | 145.61        | O2E       | POLRIU         | 145.456       | O3        | EDONOE         | 145.313       | O6        |
| ITAFEQ         | 145.605       | O3        | QOCVIN         | 145.452       | F5        | GAVNAV         | 145.313       | O4        |
| LERNAZ         | 145.605       | O10       | QUKRAS         | 145.446       | O3        | LARRUT         | 145.313       | O2        |
| AJUKUN         | 145.603       | CI1       | HUCHOD         | 145.445       | O4        | NAZWES         | 145.311       | N2        |
| XOZJOL         | 145.597       | O14       | AGOKOY         | 145.444       | O7        | WIJDAV         | 145.308       | O11       |
| MAGBIH         | 145.594       | O15       | WOPGUF         | 145.442       | O8        | MARDAN         | 145.305       | O5        |
| LETLUU         | 145.585       | S5        | DONREE         | 145.437       | O11       | WISQIA         | 145.3         | N2        |
| FOPREI         | 145.584       | N5        | OHUYIB         | 145.435       | N6        | DAWQOK         | 145.299       | O11       |
| SOXTAC         | 145.581       | O19       | DAWQIE         | 145.435       | O9        | RISRER         | 145.299       | O8        |
| XECFUI         | 145.58        | O6        | OJIPIJ         | 145.433       | N2A       | RULDUX         | 145.298       | O3        |
| XOZJOL         | 145.579       | O10       | GIQZUF         | 145.423       | O5        | PUDBAT         | 145.286       | N22       |
| WUJRUP         | 145.578       | O3        | GIWHEA         | 145.423       | O1        | SUVPEH         | 145.286       | O22       |
| DIWNOP         | 145.577       | O4        | HUZZUY         | 145.419       | O4A       | EMATAQ         | 145.285       | O9        |
| YELHAB         | 145.576       | O5        | EXEVOT         | 145.419       | S1        | LESGIC         | 145.28        | O1        |
| WARCOJ         | 145.573       | O3        | EQOVIP         | 145.413       | O1        | DEHFUR01       | 145.278       | O23       |
| MAVMUU         | 145.566       | O6        | FUZYEH         | 145.413       | O3        | GAYZOV         | 145.272       | S2        |
| PUWKUP         | 145.566       | O7        | UJAPOL         | 145.408       | O16       | ZIHQIU         | 145.263       | O5        |
| GUQLUA         | 145.557       | O53       | OWUJEX         | 145.407       | O13       | OXPTZN         | 145.262       | CI3       |
| HIXJUW         | 145.556       | O6        | MAKCEI         | 145.406       | O14       | DUWFOS         | 145.258       | O3        |
| UMAWOV         | 145.553       | O5        | PUGXOE         | 145.398       | N1        | NEPPAZ         | 145.256       | O18       |
| XOJWUP         | 145.55        | O4B       | EMEZAY         | 145.398       | O14       | AGOJOX         | 145.255       | O1        |
| OKUXUQ         | 145.544       | O10       | HOJJOI         | 145.397       | O9        | HIYNIN         | 145.242       | O10       |
| LARRUT01       | 145.541       | O3        | KAQGIV         | 145.395       | O11       | UYIBUB02       | 145.238       | O2        |
| GUBVUW         | 145.535       | O4C       | ROBQAB         | 145.387       | O1        | CAYWEG         | 145.234       | O14       |
| LAHRIX         | 145.532       | O3        | OXUROQ         | 145.386       | O5        | ZEJSUF         | 145.231       | O5        |

|                |               |           |                |               |           |                |               |           |
|----------------|---------------|-----------|----------------|---------------|-----------|----------------|---------------|-----------|
| RIWZUW         | 145.529       | O9        | AXOCEW         | 145.383       | O4C       | CESQUP         | 145.226       | O7A       |
| LOGZAK         | 145.525       | O9        | OFUNOW         | 145.381       | O4        | FAXDAM         | 145.225       | O2        |
| <b>Refcode</b> | <b>∠YZnLB</b> | <b>LB</b> | <b>Refcode</b> | <b>∠YZnLB</b> | <b>LB</b> | <b>Refcode</b> | <b>∠YZnLB</b> | <b>LB</b> |
| FULCOH         | 145.523       | O17       | VIRLAK         | 145.381       | O87       | PIKYOY         | 145.225       | S1        |
| ERIKOG         | 145.52        | O1        | WISQEW         | 145.38        | N2        | DUDLOF         | 145.221       | I1        |
| NAZZOG01       | 145.221       | O11       | YUXQIT02       | 145.076       | O7        | ITAFEQ01       | 144.94        | O4        |
| RIWGIO         | 145.221       | O7        | WACRUR         | 145.074       | O19       | OYOWEH         | 144.938       | N17       |
| NIQLAC         | 145.217       | F4        | CAQHAF         | 145.061       | O48       | LUWTOM         | 144.938       | O2        |
| MORLIR         | 145.21        | O2B       | JEMYAE         | 145.059       | N1        | BOWVOA         | 144.929       | F4        |
| XEYSOM         | 145.206       | N7        | PAFWEY         | 145.059       | O2        | BOWVOA01       | 144.929       | F4        |
| MARDAN         | 145.205       | O34       | PAFWEY10       | 145.059       | O2        | KAMTID         | 144.924       | O2F       |
| RIDWUX         | 145.203       | O21       | UBOWIT         | 145.054       | O5        | VEKGEA         | 144.922       | O6        |
| SUWZOC         | 145.201       | O44       | VONCOR         | 145.049       | O9        | JENBIQ         | 144.911       | N6        |
| QORFAE         | 145.198       | O10       | IMUZIZ         | 145.047       | O4A       | ICUFOC         | 144.905       | O2        |
| DUGYOU         | 145.195       | O11       | YESFOS         | 145.042       | O1        | EBAWAH         | 144.903       | N4        |
| FEFVAO         | 145.187       | O6        | QARVIP         | 145.035       | N11       | IDOVUV         | 144.901       | O50       |
| SUPGAO01       | 145.186       | O3        | XEHFIC         | 145.03        | O10       | JABGUR         | 144.901       | O2        |
| NIDMIX         | 145.182       | N3D       | QARVIP         | 145.025       | O8        | MOFWUA         | 144.898       | O2        |
| IHEMUF         | 145.174       | O11       | ONAVAB         | 145.022       | O1        | ETANOD         | 144.896       | O3        |
| WISQOG         | 145.173       | N2        | PITNAJ         | 145.022       | O5        | OHANIW         | 144.895       | O13       |
| JAMVOM         | 145.173       | O12       | RANTEF         | 145.019       | N2        | VIBJEW         | 144.895       | O14       |
| CUWMEN         | 145.166       | O4        | ARAGUX         | 145.018       | N3B       | ALOKES         | 144.893       | O10       |
| TOLPIW         | 145.165       | N2A       | QASZOC         | 145.017       | O7        | DOBGUX         | 144.893       | O1        |
| JENBIQ         | 145.164       | N7        | FETXAG         | 145.012       | O15       | NAZZOG         | 144.89        | O12       |
| KIKFIW         | 145.163       | I3        | DUDLOF         | 145.008       | I2        | UZIDAJ         | 144.89        | O8        |
| MUTVIH         | 145.162       | O6        | RACYAW         | 145.008       | O3        | DASQAQ         | 144.882       | O23       |
| QASPAE         | 145.159       | N1        | MILRUY         | 145.006       | O3        | NEGJOZ         | 144.882       | S1        |
| OPOYUO         | 145.157       | O6        | DEBSUZ         | 145.004       | O10       | OJIPIJ         | 144.874       | N6A       |
| SUWBOC         | 145.156       | O14       | LODQIF         | 145.003       | C13       | COFCIL         | 144.866       | O5        |
| ICUBUE         | 145.153       | O2        | SUPGAO         | 145.003       | O4        | KATQIF         | 144.864       | O6        |
| WUFBUV         | 145.15        | O9        | ZEFWOY         | 145.003       | O2        | LOWGIQ         | 144.863       | S2        |
| BAVSOJ         | 145.144       | O11       | GASREA         | 145.001       | O1        | OGUBAV         | 144.858       | N5        |
| BAMWUJ         | 145.143       | F7        | RUWMUT         | 144.998       | O18       | KEMKET         | 144.858       | O15       |
| JEXQEJ         | 145.141       | O5        | MUYCOB         | 144.996       | O1C       | LMETZN01       | 144.855       | O3        |
| CUWMEN01       | 145.14        | O2        | LOLFID         | 144.991       | O6        | GLYZNS10       | 144.852       | O8        |
| BUBHUE         | 145.138       | N15       | JUYROM         | 144.989       | N1        | BINBAE         | 144.85        | O8        |
| EMOQIH         | 145.138       | O14       | YUXQIT         | 144.989       | O7        | PUJVEY         | 144.849       | O6        |
| APANUC         | 145.135       | N6        | AJEDEZ         | 144.988       | O7        | SIQFAA         | 144.845       | O9        |
| ADIGUQ         | 145.131       | O2A       | FETPOM         | 144.986       | O9        | FIPKIA         | 144.841       | S1        |
| LASMEZ         | 145.128       | O12       | DUYJOY         | 144.983       | O4        | VOCNAE         | 144.838       | O11       |
| RAQBAO         | 145.118       | O13       | UHEWEM         | 144.981       | N3        | AFIQUB         | 144.836       | O15       |
| KENJUK         | 145.112       | O2        | CAYGEP         | 144.98        | O12       | PIJKAV         | 144.836       | O7        |
| QETCAT         | 145.098       | O7        | FEXPOP         | 144.98        | O12       | TOBPOS         | 144.834       | O6        |
| WIJDAV         | 145.097       | N5        | IYUVAB         | 144.978       | N1        | YUXROA01       | 144.83        | O1        |
| WUSFAU         | 145.094       | N4        | LAWHAV         | 144.978       | O14B      | VIQMEO         | 144.826       | N1        |
| DIDTAP         | 145.094       | O2E       | UWADUT01       | 144.973       | O6        | HITVOZ         | 144.818       | O15       |
| LOYMET         | 145.094       | O2A       | KOHBEP         | 144.965       | O1        | MAJZAB         | 144.807       | O3        |
| JEMXUX         | 145.093       | N2        | QELKEA         | 144.965       | O30       | LODQIF         | 144.805       | N17       |
| RECKIX         | 145.091       | O2        | DIYXEO         | 144.957       | N1        | NESQOT         | 144.803       | O9        |
| SENFUP         | 145.091       | O2A       | LASMEZ         | 144.948       | O23       | MIQYER         | 144.801       | O4        |
| KARDEM         | 145.078       | O12       | JEXXUG         | 144.946       | N2        | YUXQIT01       | 144.797       | O7        |
| UNOKIS         | 145.078       | O7        | GUVFUY         | 144.946       | O11       | XUTCOG         | 144.796       | O11       |
| NUHHIK         | 145.077       | O2        | NOWSID         | 144.943       | N3        | PAGSUP         | 144.793       | O5        |
| TARWUF         | 145.076       | N4        | REPQEM         | 144.942       | O4        | BUQZOD         | 144.791       | N4F       |
| YOQYUZ         | 144.786       | N2A       | WIGTEP         | 144.643       | N2        | UYAGUZ         | 144.519       | S5        |
| NALNIZ         | 144.784       | S1        | NAZZOG01       | 144.643       | O12       | EPEYII         | 144.518       | O10       |
| PEBNIV         | 144.777       | O6D       | MEYPIT         | 144.642       | O7        | UGEZEN         | 144.517       | O4        |
| IJUXUG01       | 144.773       | O2        | OHUYIB         | 144.64        | N3        | LAYLAB         | 144.515       | O3        |
| LASMEZ         | 144.772       | O2        | GAGSOY         | 144.635       | S1        | DIFVIB         | 144.509       | O8        |
| MORLIR         | 144.772       | O5A       | AMERIT         | 144.632       | O1        | YUXWEV         | 144.509       | O8A       |

|                |               |           |                |               |           |                |               |           |
|----------------|---------------|-----------|----------------|---------------|-----------|----------------|---------------|-----------|
| UGUKUD         | 144.771       | O4A       | SOMKUC         | 144.63        | O4B       | YUXROA         | 144.507       | O7        |
| IJUVAN         | 144.77        | F6        | SUPLAR         | 144.629       | O8        | DIHNEO         | 144.499       | S2        |
| <b>Refcode</b> | <b>∠YZnLB</b> | <b>LB</b> | <b>Refcode</b> | <b>∠YZnLB</b> | <b>LB</b> | <b>Refcode</b> | <b>∠YZnLB</b> | <b>LB</b> |
| RUWMED         | 144.764       | O38       | ZNGLUD02       | 144.628       | O6        | IVEQAB         | 144.496       | O23       |
| VUTDAR         | 144.762       | O6        | QIBNOE02       | 144.622       | O9        | NUWWAE         | 144.493       | O2        |
| WIJDAV         | 144.762       | O6A       | ZNGLUD         | 144.607       | N1        | BAFTAF         | 144.491       | O3        |
| IJUXUG         | 144.761       | O2        | OTIVUJ         | 144.6         | O7        | QIBNOE01       | 144.49        | O3        |
| PEPHID         | 144.76        | O5        | LUWSIF         | 144.597       | O3        | ZIDBUN         | 144.487       | O2C       |
| DAGXOZ         | 144.759       | O6        | NAZZOG         | 144.597       | O11       | MOHLEB         | 144.485       | O5        |
| GUCQIH         | 144.756       | O9        | ULEPOS         | 144.595       | O1A       | KIFVOM         | 144.484       | N12       |
| ESADUY         | 144.753       | O6        | PAPGUK         | 144.591       | CI2       | SARCIA         | 144.476       | N14       |
| ZIHQIU         | 144.75        | O3        | ESADUY         | 144.59        | CI1       | UWUVAK         | 144.469       | CI2       |
| BAVVUS         | 144.744       | O5        | LALTAV         | 144.589       | N5        | HAYDOC         | 144.466       | O5        |
| FUPQOW         | 144.744       | O20       | XAGQAZ01       | 144.582       | O6        | JEDNAK         | 144.461       | CI3       |
| OWUHOF         | 144.744       | O18       | SIRVIC         | 144.58        | S1        | XAGQAZ         | 144.454       | O3        |
| RUWMED         | 144.74        | O19       | REFLEV         | 144.579       | N3        | FIPRUR         | 144.452       | O4        |
| ZNGLUD02       | 144.738       | N1        | YAKYER         | 144.578       | S1        | IBESAN         | 144.449       | O12       |
| NOMQAJ01       | 144.737       | O3A       | OFOPUV         | 144.577       | O9        | OQEYUG         | 144.445       | O4        |
| QOMFEF         | 144.737       | O52       | NEKXOU         | 144.576       | O3        | RUWMUT         | 144.445       | O20       |
| GUGXOY         | 144.727       | O10       | BICJEG         | 144.575       | O4        | KIJKEW         | 144.443       | N4        |
| NOMQAJ01       | 144.723       | O2B       | NADCUS         | 144.575       | O6        | PUWKUP         | 144.435       | O5        |
| OGUHAA         | 144.721       | O3        | ZNGLUD01       | 144.57        | N1        | ICUGET         | 144.432       | O4        |
| AZOLAD         | 144.716       | N2        | CUBWIG         | 144.569       | O5        | SOTJAN         | 144.426       | O20       |
| CIVBAL         | 144.714       | CI2       | GOCMIW         | 144.569       | O7        | DEYVUA         | 144.425       | O2B       |
| KUBTEH         | 144.713       | O8        | KUBNIG         | 144.568       | O8        | RAGVIH         | 144.422       | O11       |
| YIHLOS         | 144.713       | O6        | DOVHAX         | 144.564       | O9        | IXOQOE         | 144.42        | O9        |
| OHICUG         | 144.71        | O7        | LOLRUC         | 144.562       | O6        | QOJYIZ         | 144.412       | O6        |
| MUDFEW         | 144.708       | N2        | AHONIW         | 144.559       | O2        | COLBUB         | 144.411       | O1        |
| RUZSUA         | 144.707       | O11       | ADABOW         | 144.558       | N5        | ZNGLUD01       | 144.406       | O6        |
| GERPID         | 144.706       | O3A       | WIRHUD         | 144.558       | O12       | UHAZAE         | 144.405       | S1        |
| UMIJAD         | 144.706       | O5        | REJXOX         | 144.551       | O4        | MADRUH         | 144.4         | N5        |
| WIJZEV         | 144.7         | N4        | LUGREK         | 144.547       | O2        | ECUHER         | 144.393       | CI1       |
| CISMAU         | 144.699       | O2        | GERPID03       | 144.546       | O4A       | NOVQOH         | 144.392       | O14       |
| VAMMOM         | 144.698       | N1        | ZODKEI         | 144.545       | CI3       | WABFIP         | 144.39        | CI3       |
| MIJJOJ         | 144.694       | N5C       | GUGXUE         | 144.544       | O8        | SOWCOY         | 144.383       | O3D       |
| GASSAX         | 144.692       | O2        | IFIBAA         | 144.543       | N1        | SIYGAK         | 144.382       | O4        |
| XIQFIO         | 144.69        | N10       | AQIFOW         | 144.542       | O10       | PUTGOA         | 144.381       | N6        |
| NUCDIZ         | 144.689       | O12       | SIYGEO         | 144.541       | O1        | ROFLUW         | 144.381       | N1        |
| LELSOO         | 144.688       | O10       | ZNGLUD         | 144.54        | O6        | EXIFUN         | 144.38        | O7        |
| MAPMUP         | 144.687       | O3        | QOFKIF         | 144.539       | O18       | WIJDAV         | 144.38        | O8A       |
| SOLYEA         | 144.671       | N2        | BORJIC         | 144.537       | N6        | MAPMOJ         | 144.379       | O4A       |
| PENPAB         | 144.665       | O4B       | JIDXEC         | 144.531       | N5        | ALOPAS01       | 144.377       | O2        |
| PIWZOO         | 144.658       | O6        | IGUDEV         | 144.528       | O9        | XEKYOE         | 144.371       | O2B       |
| DAFYIW         | 144.643       | N9        | CUVJEL         | 144.526       | O5        | EYAYAG         | 144.366       | O15       |
| MAPMOJ         | 144.363       | O6A       | TERFUT         | 144.204       | N3        | RUWMUT         | 144.068       | O29       |
| HOMPUV         | 144.362       | CI5       | TAYBII         | 144.201       | O2        | XEMPEN         | 144.064       | O7        |
| SIYFOX         | 144.361       | O4        | BAFTAF         | 144.198       | O2        | NETTAK         | 144.063       | S1        |
| ZUSVEO         | 144.361       | F3A       | XOYDEX         | 144.197       | O3B       | COKCEN         | 144.057       | O19       |
| ICOSIF         | 144.355       | N10       | CUMBUI         | 144.183       | N3        | FONPAZ         | 144.051       | N8        |
| YEJNAF         | 144.355       | O3        | REHGAN         | 144.178       | O8        | MAPNEA         | 144.05        | O6A       |
| GERPID01       | 144.353       | O1A       | MATKAX         | 144.177       | F15       | QUQDEN         | 144.049       | N3        |
| GERPID02       | 144.352       | O5A       | BIZFUL         | 144.172       | O10       | WIJDAV         | 144.043       | O12       |
| SICDIT         | 144.352       | O2        | MULKUZ         | 144.17        | O8        | GEHYEB         | 144.033       | O9        |
| VONCOR         | 144.349       | O3        | QOCVIN         | 144.17        | O2        | TITRIY         | 144.032       | O5        |
| GUQLUA         | 144.335       | O49       | XUGBOR         | 144.168       | O10       | ASUWUI         | 144.03        | O7        |
| DIYXAK         | 144.332       | N4        | UYAJIO         | 144.166       | N3        | CEFLEH         | 144.026       | O11       |
| VOCNAE         | 144.323       | O3A       | OFIQUS01       | 144.165       | F2        | WABBEI         | 144.025       | N5        |
| NUDNIL         | 144.32        | N17       | TIVJIT         | 144.164       | O50       | KEYXAO         | 144.025       | O11       |
| WULQAX         | 144.319       | O6        | CUWNOA         | 144.161       | O8A       | BEGZOE         | 144.022       | O1B       |
| NETJAB         | 144.316       | N2A       | DARNUH         | 144.16        | O10       | YIRPUO02       | 144.021       | O17A      |

|                |               |           |                |               |           |                |               |           |
|----------------|---------------|-----------|----------------|---------------|-----------|----------------|---------------|-----------|
| XANCEV         | 144.315       | O2        | KEDRAO         | 144.153       | O7        | YIRPUO01       | 144.019       | O19A      |
| ALOPAS02       | 144.314       | O4        | SECXUU         | 144.15        | Cl2       | OHALAL         | 144.017       | O5        |
| <b>Refcode</b> | <b>∠YZnLB</b> | <b>LB</b> | <b>Refcode</b> | <b>∠YZnLB</b> | <b>LB</b> | <b>Refcode</b> | <b>∠YZnLB</b> | <b>LB</b> |
| QIBNOE         | 144.31        | O6        | ZASWEY         | 144.147       | N2        | AVIMOI         | 144.015       | O17       |
| UDIRUW         | 144.307       | O2        | MOCTEF         | 144.147       | O12       | EBEVOZ         | 144.011       | Cl2       |
| LEHNAR         | 144.305       | O11       | VIXTOM         | 144.144       | O2B       | FAKTIY         | 144.009       | O8        |
| OWUJEX         | 144.305       | O9        | ZEFXUF         | 144.143       | O3        | POLDOL         | 144.002       | O5        |
| QIFKOJ         | 144.304       | O7        | ROJQJS         | 144.142       | N4        | HUZDUD         | 144           | O3D       |
| AFUJAM         | 144.288       | O18       | DENHUA         | 144.142       | O18       | JAJPIU         | 143.991       | O11       |
| TUFLOW         | 144.287       | N4        | AQEQUI         | 144.138       | O6        | AXOSOY         | 143.983       | O1        |
| NOHFAU         | 144.283       | O7        | GLYZNS10       | 144.137       | O10       | GABVUD         | 143.977       | O6        |
| FEXNAZ         | 144.283       | S1A       | KOZJUH         | 144.135       | N6        | RERKUW         | 143.975       | O4        |
| WIRHUD         | 144.281       | O8        | DUQZOH         | 144.132       | O8        | QARVEL         | 143.972       | N2        |
| HIJSUO         | 144.279       | O1        | XAGQAZ01       | 144.129       | O5        | REGROO         | 143.971       | O9A       |
| CIMJOA         | 144.277       | O3        | DARPAP         | 144.127       | O10       | OZUNEF         | 143.97        | O2        |
| XOJWUP         | 144.276       | O6        | LODNOK         | 144.126       | O5        | GEYRIO         | 143.969       | O10       |
| DINTAX         | 144.275       | N9        | NAMCUA         | 144.122       | O2        | SUVPEH         | 143.968       | O32       |
| NUJVAS         | 144.268       | O1        | WEBRAZ         | 144.122       | O7        | XAGQAZ         | 143.965       | O7        |
| REHGAN01       | 144.266       | O3        | RUNVAY         | 144.116       | Cl1       | MAPNEA         | 143.964       | O5A       |
| ZUSJII         | 144.265       | O2        | MUDFEW         | 144.114       | O10       | QARVIP         | 143.963       | O10       |
| AXOSOY         | 144.264       | N2        | MODHOD         | 144.108       | S2        | QUCGAY         | 143.962       | N3        |
| VOQDEL01       | 144.255       | O2        | OXUROQ         | 144.1         | N4        | WIWDUD         | 143.961       | O4A       |
| BOPZAJ         | 144.242       | N2        | EXOFAZ         | 144.099       | O1        | MEWPIQ         | 143.96        | O1I       |
| FONPAZ         | 144.241       | O4        | WERQIT         | 144.098       | F3        | HAZYUE         | 143.958       | O7C       |
| CAYWEG         | 144.24        | O22       | WUJREA         | 144.094       | F6        | LAGROC         | 143.955       | O1I       |
| VEGSAF         | 144.239       | O3        | LUKDOK         | 144.09        | O3        | ICUBUE         | 143.951       | O3        |
| XOZKAY         | 144.238       | O14       | MAGBIH         | 144.086       | O18       | VAJHIA         | 143.946       | O8        |
| NEXKUX         | 144.236       | O5        | DEBSUZ         | 144.085       | O13       | CIVBAL         | 143.943       | O7        |
| UDITEJ         | 144.231       | O1        | LIJQOM         | 144.084       | O15       | CAQHAF         | 143.942       | O55       |
| NOMQAJ         | 144.225       | O1A       | MUJFUV01       | 144.083       | N2A       | DERTIH         | 143.932       | N5        |
| BOJVUR         | 144.221       | N8        | OXPAZN         | 144.083       | Cl2       | CIVBAL         | 143.928       | O21       |
| QEMDOB         | 144.214       | O3        | SIZRIC         | 144.081       | O2        | VAMMOM         | 143.924       | N1        |
| MILRUY         | 144.207       | O5        | AFUWEG         | 144.075       | O16       | MEWPIQ         | 143.918       | O3G       |
| ALOPAS         | 144.206       | O4        | AHOMOB01       | 144.07        | O2B       | YEQRES         | 143.917       | O11       |
| GIDCUT         | 143.911       | O20       | XIKSAL         | 143.742       | F7        | CITTUW         | 143.551       | O4C       |
| GUPBOK         | 143.909       | O4        | NACZIE         | 143.741       | O5        | ULEQEJ         | 143.548       | N1        |
| JEXQEJ         | 143.898       | Cl1       | GIXDOH         | 143.735       | O7        | DEYVUA         | 143.548       | O3E       |
| IPUKIQ         | 143.897       | O6        | GIQNUT         | 143.73        | O3        | AMUWOV         | 143.547       | Cl1       |
| NODDAM         | 143.896       | N6C       | QUDKOQ         | 143.728       | N4        | TOJBIF         | 143.547       | O11B      |
| ROQKIT         | 143.896       | O1        | LEPPUU         | 143.728       | O6A       | MEWWET         | 143.53        | O4A       |
| HUQCOL         | 143.895       | S3        | HYZCZN         | 143.71        | N2        | IFABIA03       | 143.519       | O1A       |
| YIRPUO         | 143.894       | O17A      | FUPQOW         | 143.71        | O21       | BOYFOM         | 143.511       | O8        |
| EBAWAH         | 143.88        | O8        | UFAGAK         | 143.707       | O7        | REPJUS         | 143.501       | Cl1       |
| BOVLAA         | 143.877       | O7        | YIKGIL         | 143.706       | N3        | HOJJIC         | 143.499       | O3        |
| LITHUU         | 143.875       | O10       | KUBSIK         | 143.703       | S2A       | DEHFON         | 143.494       | O4        |
| QARVEL01       | 143.87        | N1        | VUMVEH         | 143.699       | N1        | NUJTUK         | 143.488       | N10       |
| WARCOJ         | 143.87        | O10       | MALFOU         | 143.699       | O10       | TEBMIA         | 143.488       | O9        |
| FEQVEE         | 143.865       | O7A       | SOMNOA         | 143.696       | O1C       | QUCGAY01       | 143.481       | N1        |
| WIJDAV         | 143.851       | O15       | EKOZUA         | 143.692       | O6        | BEPNER         | 143.481       | O12       |
| FUBNOH         | 143.849       | O2A       | ROGMEG         | 143.684       | O2G       | OYOWIL         | 143.479       | N16       |
| JISYIX         | 143.849       | O5        | OZOJIZ         | 143.678       | N2A       | MATYIT         | 143.476       | F4        |
| RAMROP         | 143.848       | O7        | XILGUU         | 143.677       | O9        | TOJLIN         | 143.471       | F37       |
| MUJFUV         | 143.846       | N2A       | DUGYUA         | 143.675       | N6D       | LASMEZ         | 143.468       | O27       |
| WIHMIK         | 143.846       | S2        | OWUJIB         | 143.67        | O9        | MIMRAB02       | 143.465       | O2E       |
| EMOTOQ         | 143.835       | O3        | FOTBUO         | 143.661       | O7B       | LETRUB         | 143.461       | F8        |
| ESASUN         | 143.834       | O6        | ROBCEQ         | 143.661       | O16       | ULEXER         | 143.457       | O18       |
| OGUHAA         | 143.834       | O1A       | QOMFEF         | 143.653       | O54       | UFARAX         | 143.452       | O1A       |
| NOBYIO         | 143.83        | O12       | YIHKUZ         | 143.648       | O20       | KARSUS         | 143.44        | I5        |
| RASGOK         | 143.827       | O8        | PETFON         | 143.646       | O2        | MALFOU         | 143.437       | O8        |
| RASGAW         | 143.825       | O8        | MUZVUY         | 143.633       | O10       | GAYZIP         | 143.434       | N1        |

|                |               |           |                |               |           |                |               |           |
|----------------|---------------|-----------|----------------|---------------|-----------|----------------|---------------|-----------|
| HOWHOQ         | 143.823       | CI2       | YUXQIT         | 143.63        | O7        | OPICIC         | 143.434       | O19       |
| LIWXEV         | 143.819       | O6D       | POMNAI         | 143.621       | O6        | VIQZAX         | 143.424       | O8A       |
| <b>Refcode</b> | <b>∠YZnLB</b> | <b>LB</b> | <b>Refcode</b> | <b>∠YZnLB</b> | <b>LB</b> | <b>Refcode</b> | <b>∠YZnLB</b> | <b>LB</b> |
| JIDXEC         | 143.816       | N11       | TISPER         | 143.62        | O3        | XULFEQ         | 143.42        | O9A       |
| LACQIS         | 143.815       | O8        | OYAPUB         | 143.618       | O6        | GARMAR         | 143.418       | O3        |
| TICDAM         | 143.815       | O5        | POMNAI01       | 143.618       | O7        | FUMYUI         | 143.416       | O16       |
| WALBOC         | 143.811       | O6        | TISBIG         | 143.617       | O6        | YUXQIT01       | 143.413       | O7        |
| VIHLAK         | 143.81        | O93       | MIGXIM         | 143.612       | O2        | HIQMUR         | 143.41        | O10       |
| OBUNEI         | 143.809       | O12       | RUPZEK         | 143.602       | O5        | TUFJAG         | 143.404       | O6        |
| GAYZIP01       | 143.806       | O5        | WIGTEP         | 143.601       | O3        | YOWPOP         | 143.4         | N1        |
| HEJNOD         | 143.805       | N8        | LEPPUU         | 143.599       | O8        | GASSUR         | 143.4         | O3G       |
| PUSWAC         | 143.805       | F11       | NOMQAJ01       | 143.599       | O4B       | JEXXUG         | 143.399       | S3        |
| EBIKAB         | 143.801       | O8        | SUVPEH         | 143.598       | O34       | GOTLIM         | 143.396       | O5        |
| MAQLEY         | 143.801       | O2        | WENPIO         | 143.597       | CI2       | POTWAZ         | 143.393       | O11       |
| JETGEY         | 143.792       | O8        | COKCEN         | 143.592       | O21       | XATQOB         | 143.391       | N8        |
| FASMOF         | 143.79        | O5        | LEQWIP         | 143.592       | O2C       | QANZEL         | 143.385       | O6        |
| KIYBED         | 143.784       | N4        | IFABIA01       | 143.59        | O2F       | MOKMUW         | 143.384       | N6        |
| ZODKEI         | 143.777       | CI3       | JAJPIU         | 143.58        | O11       | GUJFIB         | 143.383       | O1A       |
| GAYZIP01       | 143.771       | N2        | RAXNAH         | 143.573       | O11       | RASFUP         | 143.377       | O8        |
| ZNGLUD02       | 143.763       | O3C       | ROBCEQ         | 143.563       | O15       | NELTII         | 143.376       | O5        |
| TUQWAG         | 143.757       | N2        | VIWJUJ         | 143.561       | N4        | MAKHAH         | 143.373       | N9        |
| MIQSIR         | 143.75        | O9        | RASGEA         | 143.559       | O8        | RUZSUA         | 143.364       | O12       |
| MAKHAH         | 143.748       | N14       | GOJHUJ         | 143.557       | O4B       | WARCAV         | 143.36        | O3        |
| CEZWAG         | 143.742       | O2        | ZIJZEZ         | 143.553       | O4        | RERKUW         | 143.359       | O5        |
| DAXXAE         | 143.358       | O3        | OFIQUJ         | 143.155       | F2        | BASZUU         | 142.963       | O10       |
| IXOQOE         | 143.355       | N15       | HECYOF         | 143.149       | O3A       | NAKPUM         | 142.963       | O1        |
| YUXQIT02       | 143.349       | O7        | HIYNIN         | 143.145       | O5        | FIPKUM         | 142.956       | N1        |
| FEDYAQ         | 143.346       | O8        | GARMAR         | 143.133       | N1        | NEKXOU         | 142.953       | O5        |
| BIXXAI         | 143.34        | N9        | FAHMIM         | 143.13        | O8        | UJEJJO         | 142.95        | O22       |
| YUSGID         | 143.339       | S1        | OFIQUJ02       | 143.129       | F2        | UWADUT01       | 142.948       | O4        |
| IQOJAB         | 143.337       | O14       | TOTNAU         | 143.128       | O16       | HIYNIN         | 142.945       | O2        |
| DUHHAP         | 143.331       | S1        | AQEYOK         | 143.123       | O6        | PAHPIB         | 142.945       | O7        |
| NERQAC         | 143.329       | O3A       | OJUHOQ         | 143.121       | O1        | UMAWOV         | 142.945       | O10       |
| DOGMIV         | 143.323       | O1B       | KAKFEL         | 143.12        | O2        | NUDNIL         | 142.942       | O19       |
| CUBWIG         | 143.313       | O28       | WUYHUU         | 143.12        | O4        | TAQTOV         | 142.939       | N4        |
| XIGMEH         | 143.311       | N1        | WIZLUM         | 143.116       | O2        | NUJVAS         | 142.937       | O3        |
| JILREF         | 143.308       | N2        | NUHHON         | 143.108       | O4        | FUDGIW         | 142.932       | O2E       |
| AYUZUP         | 143.29        | O5        | OGUHAA         | 143.107       | O3A       | GAYZIP         | 142.928       | O5        |
| EBAWAH         | 143.287       | N8        | EKOBUJ         | 143.093       | N10       | QIBYEJ         | 142.92        | N8        |
| POWDOV         | 143.283       | O2        | TATLUZ         | 143.09        | O6        | ROJQIS01       | 142.92        | N3        |
| GOWHEI         | 143.275       | O4        | TEBDOT         | 143.089       | O2        | ARAZAX         | 142.918       | CI1       |
| DEHFUR         | 143.274       | O20       | IDOHES         | 143.086       | N3        | LAXSAH         | 142.918       | O11       |
| NOHDOG         | 143.268       | O5        | GASSUR         | 143.083       | O4F       | HEZFEY         | 142.902       | CI11      |
| BINBAE         | 143.267       | O10       | UZANEP         | 143.082       | O9        | ZIHQIU         | 142.902       | O2        |
| ZIWLAS         | 143.263       | O5        | PUMGOV         | 143.078       | N10       | NOHDOG         | 142.899       | O7        |
| RIDWUX         | 143.262       | O36       | NIPWIT         | 143.077       | O5B       | MIVDIF         | 142.89        | O7        |
| EBIROY         | 143.257       | O5A       | BECSEK         | 143.073       | O9        | RECKIX         | 142.889       | N4        |
| OGIHIY         | 143.257       | O6        | NEPMIF         | 143.058       | N3        | QETFIF         | 142.886       | N3        |
| RORSEY         | 143.25        | O5        | LEHMUK         | 143.058       | O12       | FODMUJ         | 142.886       | O3A       |
| HAILOV         | 143.249       | O1        | PUDCEY         | 143.052       | N12       | YOYTUE         | 142.879       | O6        |
| JABTOY         | 143.248       | N4        | SUYBIA         | 143.045       | O11       | AFEGAV01       | 142.869       | O3        |
| MIMRAB         | 143.242       | O1B       | COTJUT         | 143.044       | O8        | WOPNUM         | 142.867       | O7A       |
| VIBJEW         | 143.241       | O23       | YESFOS         | 143.038       | O5A       | BEMHAG         | 142.865       | O8        |
| XATQIV         | 143.237       | N7        | FOTBUO         | 143.037       | O12B      | SIYGAK         | 142.863       | O2        |
| RULXEC         | 143.23        | O1        | POGJAW         | 143.031       | N3        | CEZRIM         | 142.859       | N4        |
| QUDKAC         | 143.226       | N2        | DASSIZ         | 143.031       | CI1       | NEPPAZ         | 142.852       | O3        |
| AQUHIG         | 143.226       | CI1       | IXOQIY         | 143.021       | CI3       | LILVAD         | 142.848       | O7        |
| PUFYAR         | 143.219       | O9        | MIVDIF         | 143.018       | O9        | NIPWIT01       | 142.847       | O5B       |
| HOMGEX         | 143.217       | O3        | PERBOF         | 143.007       | O1        | DUDLOF         | 142.843       | I1        |
| FIPRUR         | 143.21        | O5        | ZOTMON         | 143           | N6        | RUWMED         | 142.841       | O52       |



|                |               |           |                |               |           |                |               |           |
|----------------|---------------|-----------|----------------|---------------|-----------|----------------|---------------|-----------|
| DISWOU         | 143.203       | O2        | PENMOO         | 142.997       | N3C       | MAJDUY         | 142.841       | S1        |
| UKEHOJ         | 143.197       | O17       | LUWTEC         | 142.996       | O6        | VEGSAF         | 142.839       | O2        |
| <b>Refcode</b> | <b>∠YZnLB</b> | <b>LB</b> | <b>Refcode</b> | <b>∠YZnLB</b> | <b>LB</b> | <b>Refcode</b> | <b>∠YZnLB</b> | <b>LB</b> |
| HODZIJ01       | 143.194       | N3        | TIMQEM         | 142.995       | O7        | MALTUR         | 142.833       | N19       |
| WEXCIN         | 143.189       | O6        | NODDAM         | 142.987       | N3        | OXOGUG         | 142.831       | Se3       |
| MIVDIF         | 143.187       | O5        | HIKNEX         | 142.986       | N4        | IVEQAB         | 142.829       | N5        |
| RUZQAE         | 143.174       | O5        | KEBGIK         | 142.986       | N2        | HAGMAG         | 142.828       | O3        |
| MAKYUS         | 143.172       | O4        | ZAQXEX         | 142.981       | O4        | NACZIE         | 142.825       | O6        |
| BAYYON         | 143.17        | N1        | PIXVUO         | 142.979       | N2        | LOYMET         | 142.821       | O1        |
| DIHNEO         | 143.168       | O10       | OJUHOQ01       | 142.978       | O1        | SARCIA         | 142.816       | N2        |
| WENDIE         | 143.166       | O2C       | VAJXAI         | 142.974       | N4        | WALBOC01       | 142.81        | O8        |
| CAVXOP         | 143.156       | O4        | AZAQOJ         | 142.972       | O1        | LUQKOA         | 142.809       | O9        |
| GUPBOK         | 143.156       | O1        | KAQGIV         | 142.965       | O9        | QOVSAK         | 142.807       | N6        |
| TIKXET         | 143.155       | O6        | SOQDAE         | 142.965       | O4        | GILFUF         | 142.807       | O1D       |
| KEDQOB         | 142.805       | O5        | OGIMOG         | 142.666       | O3        | CUBYIJ         | 142.503       | O26       |
| XEKYOE         | 142.8         | O1A       | OWUJIB         | 142.666       | O10       | FAMBIG         | 142.502       | O8        |
| COYHIJ         | 142.796       | N5        | GAYZOV         | 142.664       | N1        | JEXQEJ         | 142.498       | O1        |
| ITUBOP         | 142.795       | O1        | RIHJOJ         | 142.663       | O2A       | TEDYAE         | 142.496       | O14       |
| SASGEY         | 142.795       | O2        | BIZFUL         | 142.656       | O11       | CEZVIO         | 142.486       | O5        |
| KEHNIW         | 142.794       | O21       | OFOPUV         | 142.65        | O9        | CEPLUF         | 142.483       | O3        |
| KIJKAS         | 142.787       | N1        | RAXSIU         | 142.645       | N3        | RIWWOK         | 142.483       | O1A       |
| NUCDIZ         | 142.784       | O6        | CILDOR         | 142.644       | O5        | ZIHWIZ         | 142.482       | F27       |
| ADOKEN         | 142.783       | O12       | PICBAE         | 142.64        | O8        | EBALAY         | 142.478       | O2        |
| RIXQIA         | 142.782       | N7        | GIQZUF         | 142.637       | N3        | ZIWLAS         | 142.468       | O6        |
| QOJYIZ         | 142.779       | O5        | XUQHOH         | 142.635       | O8        | NUDNIL         | 142.467       | N18       |
| EBALAY         | 142.771       | O3        | AJIGEG         | 142.623       | O26       | MULKOT         | 142.466       | O12       |
| ISODUP         | 142.765       | O8        | UZAMUE         | 142.623       | O9        | PUKTUM         | 142.466       | O9        |
| MIBSUM         | 142.765       | O8        | HECWOD         | 142.619       | O15       | VOZCIY         | 142.459       | O4        |
| MEMXAD         | 142.763       | N4        | KEBGIK         | 142.618       | O8        | FAMFAC         | 142.457       | O4        |
| OPOLUC         | 142.763       | O1        | MEYPIT         | 142.617       | O4        | RUPSUS         | 142.455       | O6        |
| JIWKOQ         | 142.759       | N18       | SIVXAY         | 142.613       | O4C       | AQIFOW         | 142.452       | O10       |
| TISBIG         | 142.759       | O7        | LIDWAA         | 142.602       | O2        | NOVQOH         | 142.452       | O6        |
| QASPAE         | 142.755       | O11       | TARYET         | 142.601       | O5        | TEDXUX         | 142.446       | O15       |
| DOLVOP         | 142.751       | S4        | ZIHWIZ         | 142.597       | F29       | YEYVEH         | 142.445       | O18       |
| TIVJIT         | 142.75        | O4        | MOKZUJ         | 142.596       | O7        | SIYGEO         | 142.427       | O2        |
| CILDOR01       | 142.748       | O5        | SUZGOM         | 142.595       | O2        | LOHRAE         | 142.422       | O11       |
| OPOZAV         | 142.746       | O3G       | HYZCZN         | 142.594       | O1        | ULITIV         | 142.421       | F3        |
| XEKYOE         | 142.742       | O4C       | HISWAK         | 142.593       | O5A       | XIXPEA         | 142.415       | O13       |
| OXPAZN         | 142.737       | O8        | MOJTAH         | 142.589       | O6        | WECKOH         | 142.412       | O10       |
| QOCVIN         | 142.735       | F1        | QICTEC         | 142.589       | O1B       | QAVBIA         | 142.406       | O4B       |
| VUJTIE         | 142.727       | O5        | LEJYAE         | 142.588       | O3        | ZEBJUL         | 142.399       | N2        |
| YISMUM         | 142.725       | CI2       | OMEBIS         | 142.584       | O6        | ABUQEW         | 142.39        | O10       |
| CAPXEY         | 142.712       | O8        | LOZQEY         | 142.565       | O7        | ROVFEP         | 142.39        | O20       |
| WEHGEY         | 142.711       | N8        | VIZPAY         | 142.564       | O20       | ROVFEP         | 142.383       | O17       |
| PENMAA         | 142.709       | N3C       | BAQHEG         | 142.556       | O5        | HAZYUE         | 142.382       | O3B       |
| BUZVOI         | 142.709       | O5        | HOMGEX         | 142.551       | O4        | VAJSUW         | 142.382       | O1        |
| SUYBEW         | 142.702       | O7        | LIDWAA         | 142.546       | O23       | RUCMAE         | 142.381       | O2        |
| OTOZOO         | 142.701       | O3        | ROVFEP         | 142.546       | O5        | SADFAH         | 142.381       | O5        |
| TAHNIB         | 142.701       | O7        | YAXJEP         | 142.536       | Te5A      | ROVFEP         | 142.38        | O16       |
| XIKWEU         | 142.699       | CI1       | AFOHIN         | 142.535       | O2        | UFARAX         | 142.378       | O2C       |
| QOBTEI         | 142.697       | CI5       | NAXVOB         | 142.534       | N2A       | QASPAE         | 142.376       | O12       |
| LAPTIJ         | 142.696       | O2        | YELFED         | 142.534       | O7        | LAKPIY         | 142.372       | O4        |
| VAMMOM         | 142.69        | N5        | PENMAA02       | 142.531       | N3C       | MEPXL          | 142.371       | N5        |
| PENMAA01       | 142.689       | N3C       | SUJLOB         | 142.529       | N1A       | DEFHUT         | 142.371       | O8        |
| YEJBAS         | 142.689       | O4        | AJUQIH         | 142.529       | O5        | HAJBAW         | 142.364       | O1A       |
| AMETOB         | 142.688       | N6        | AQEQUI         | 142.523       | O6        | GUCXEI         | 142.361       | O9        |
| TENLUX         | 142.688       | O5C       | EHIZAY         | 142.516       | F8        | YADZUA         | 142.36        | N4        |
| NICWIF         | 142.683       | F5        | REXPES         | 142.509       | O3        | HEHVOI         | 142.353       | O6K       |
| UFUGIP         | 142.681       | N4        | VIGFAW         | 142.509       | O3A       | PUWKUP         | 142.342       | O3        |
| WUVZIZ         | 142.675       | O4        | DUVPER         | 142.508       | O4        | QARVIP         | 142.341       | N10       |

|                |               |           |                |               |           |                |               |           |
|----------------|---------------|-----------|----------------|---------------|-----------|----------------|---------------|-----------|
| XUSGUN01       | 142.672       | O4        | VUPQON         | 142.508       | O1        | JEVCAP         | 142.335       | O1        |
| ICUFES         | 142.669       | O3        | DURMAF         | 142.506       | O3        | JIPVUD         | 142.333       | O3B       |
| <b>Refcode</b> | <b>∟YZnLB</b> | <b>LB</b> | <b>Refcode</b> | <b>∟YZnLB</b> | <b>LB</b> | <b>Refcode</b> | <b>∟YZnLB</b> | <b>LB</b> |
| MODHOD         | 142.666       | N2A       | XARFOP         | 142.506       | O3        | IGUDEV         | 142.332       | N14       |
| PACWIA         | 142.329       | O5E       | KEQJEX         | 142.175       | O3        | MADYID         | 142.013       | I2        |
| GOTLIM         | 142.327       | O9        | TEFQOL         | 142.174       | O3        | QAKFOA         | 142.012       | O2        |
| VUNJAR         | 142.326       | N1        | GIWHAW         | 142.172       | CI1       | FOWQEQ         | 142.003       | O5        |
| LUMCIH         | 142.326       | O1        | XELNOS01       | 142.17        | O7        | YEVVOL         | 142.002       | O5        |
| ALOKES         | 142.324       | O7        | GIWHAW01       | 142.166       | CI1       | EYERAB         | 142.001       | O16       |
| LINVOW         | 142.324       | F41       | WUDBOO         | 142.166       | O78       | MIQVAL         | 141.995       | O3        |
| ZIHWIZ         | 142.315       | F7        | NEMTUV         | 142.163       | O7        | YUZQIV         | 141.992       | O7        |
| AFEGAV         | 142.314       | O3        | ROVFEP         | 142.146       | O9        | LETRIP         | 141.987       | F1        |
| YIHKUZ         | 142.311       | O22       | QARCUJ         | 142.14        | O5        | PEDIPIY        | 141.979       | N4        |
| ACEPIL         | 142.31        | O1A       | HIZXEU         | 142.135       | O2        | YOCKUW         | 141.971       | O3        |
| CITTUW         | 142.306       | O1        | GEVFAR         | 142.129       | O3        | VIBJIA         | 141.968       | O19       |
| NAZZOG         | 142.306       | O12       | LILVAD         | 142.129       | O7        | HAJBAA         | 141.963       | O4        |
| LIRDAS         | 142.304       | N1        | WECKOH         | 142.116       | O6        | NAZZOG01       | 141.963       | O11       |
| ROVFEP         | 142.304       | O8        | PUWKUP         | 142.112       | O9        | GAKDAX         | 141.962       | O2        |
| PUDBIB         | 142.3         | N19       | COQGAS         | 142.111       | O4B       | TIVJIT         | 141.962       | O21       |
| GAYZOV         | 142.299       | S2        | LABQIQ         | 142.108       | O7A       | ZEJSUF         | 141.96        | O5        |
| SOQDAE         | 142.297       | O6        | UTUBAP         | 142.108       | O1B       | YUZQER         | 141.951       | O8        |
| UZANAL         | 142.296       | O9        | OSAXIQ         | 142.103       | O4C       | AQEYOK         | 141.944       | O8        |
| REVJUB         | 142.294       | N8        | KOZLIX         | 142.101       | N19       | VIRJEN         | 141.939       | F6        |
| KUBNAX         | 142.289       | O5        | GEHYEB         | 142.092       | N4        | VAKTIO         | 141.934       | O14       |
| POQSOD         | 142.285       | O8        | PUPXEE         | 142.091       | O1        | NACHOR         | 141.926       | O10       |
| ASUXIX         | 142.284       | O13       | YEYVEH         | 142.086       | O12       | CEBCUJ         | 141.918       | O6        |
| ROVFEP         | 142.273       | O12       | WERQIT         | 142.075       | F3        | OXPAZN         | 141.918       | O7        |
| TOFSOW         | 142.272       | O14       | YONPUN         | 142.073       | CI1       | UVIKAO         | 141.916       | O9        |
| NIDFAI         | 142.271       | N3        | QOMFEF         | 142.071       | O42       | GOGHAM         | 141.914       | S1        |
| LUMCED         | 142.271       | O6        | RAXNAH         | 142.066       | O7        | ARASIW         | 141.912       | N11       |
| JUZSEE         | 142.269       | O2        | VAXBAY         | 142.063       | O2F       | GECXUH02       | 141.907       | O6A       |
| NAZKOQ         | 142.268       | S1        | SIYGEO         | 142.062       | O3        | LUKRIT         | 141.905       | O1        |
| AZAQOJ         | 142.255       | O2        | WUMXIM         | 142.062       | O12       | BEQPAQ         | 141.9         | O1        |
| IXOQOE         | 142.255       | O24       | WUJRUP         | 142.061       | O6        | XUYVAS         | 141.899       | O8        |
| LIDWAA         | 142.254       | O13       | HEJDEJ         | 142.059       | N4A       | XIXPEA         | 141.89        | O13       |
| NEMVAD         | 142.254       | O3        | JUHZOD         | 142.056       | CI1       | RENXOZ         | 141.884       | O4A       |
| FAXCUF         | 142.253       | O5        | LOCVIL         | 142.055       | O3        | WALBOC02       | 141.881       | O7        |
| MARDAN         | 142.25        | O31       | XELNOS02       | 142.055       | O7        | MADQUG         | 141.88        | O3        |
| QAGGIS         | 142.241       | N1        | JEPVIM         | 142.054       | N3        | KENJUK         | 141.872       | O3        |
| GUBQOM         | 142.241       | O4        | RIWWOK         | 142.052       | O3        | AGEXAP         | 141.866       | O9        |
| ROVFEP         | 142.24        | O13       | PIFFEQ         | 142.05        | O1        | WENPIO         | 141.866       | O2        |
| IJIVIH         | 142.234       | S4        | NUKTOD         | 142.047       | O6        | YOCKUW         | 141.855       | O2        |
| XELNOS         | 142.229       | O7        | CEYSEF         | 142.046       | O3        | AFUWEG         | 141.853       | O6        |
| QANCAJ         | 142.227       | O3        | GAYZOV         | 142.043       | N2        | IJIVIH         | 141.852       | S1        |
| UKEHOJ         | 142.221       | O23       | ECAVAF         | 142.041       | N4        | NILRAF         | 141.849       | N3B       |
| AFIQUB         | 142.212       | O11       | MATYIT         | 142.032       | N3        | GUGYEP         | 141.849       | O9        |
| SIYFOX         | 142.205       | O2        | SOMNOA         | 142.032       | O3B       | OBOHAS         | 141.848       | O13       |
| DISWOU         | 142.203       | O4        | DEZYAL         | 142.023       | O25       | XELNOS01       | 141.847       | O6        |
| QEKRAC         | 142.192       | O19       | DEYVUA         | 142.022       | O1E       | MAXGOL         | 141.843       | O3D       |
| PATZUF         | 142.18        | O11       | ACEPIL         | 142.021       | O3        | UTEJUZ         | 141.838       | N4        |
| XEPDEE         | 142.178       | N4        | WEMZUJ         | 142.021       | O9        | ORETAH         | 141.835       | O9        |
| CEQJER         | 142.177       | N1        | XACMOD         | 142.017       | O8        | MUSMAQ         | 141.829       | O9        |
| MAJDUY         | 142.176       | S2        | AYUKIQ         | 142.016       | O11       | JOHMAW         | 141.822       | O13       |
| SAXRIU         | 141.816       | O2        | CEXSOO         | 141.594       | O3        | RUHWIA         | 141.451       | O9        |
| ALIQES         | 141.814       | O14       | NABMAF         | 141.588       | O1        | QAHVUS         | 141.45        | O10B      |
| PAGSUP         | 141.811       | O5        | YEYFIT         | 141.585       | O1        | SOMNOA         | 141.444       | O4        |
| UJEYIT         | 141.804       | O16       | NAKPUM         | 141.584       | O3        | GIZGAA         | 141.439       | O8        |
| TAVDUS         | 141.803       | N6        | UMIJAD         | 141.581       | O3        | NAHHUB         | 141.439       | O4        |
| XULFEQ         | 141.802       | O2A       | FAHMIM         | 141.579       | O4B       | HOPTIS         | 141.435       | N10       |
| MEBSUJ         | 141.797       | F4        | KIWZOJ         | 141.577       | O12       | HUQWOG         | 141.435       | O24       |

|                |               |           |                |               |           |                |               |           |
|----------------|---------------|-----------|----------------|---------------|-----------|----------------|---------------|-----------|
| MARGES         | 141.796       | O10       | GABWEN         | 141.576       | O5        | IFABIA01       | 141.434       | O3        |
| NAZZOG         | 141.796       | O11       | WUDBOO         | 141.574       | N10       | MIJJOF         | 141.433       | N5        |
| <b>Refcode</b> | <b>∠YZnLB</b> | <b>LB</b> | <b>Refcode</b> | <b>∠YZnLB</b> | <b>LB</b> | <b>Refcode</b> | <b>∠YZnLB</b> | <b>LB</b> |
| PEMRIK         | 141.789       | O10       | FIBVET         | 141.572       | O5        | FODMUJ         | 141.424       | O1        |
| MEFXII         | 141.786       | O5        | QIBNOE         | 141.572       | O8A       | NIKMAZ         | 141.411       | O3        |
| KUIJZAT        | 141.784       | O1        | LULXEX         | 141.565       | O3D       | LEQWIP         | 141.401       | O3        |
| CIKQEW         | 141.783       | F9        | GUNGUU         | 141.564       | O3        | KEBGIK         | 141.399       | O11       |
| KEPGOF         | 141.782       | O11       | QIBNOE02       | 141.563       | O11A      | MEWPIQ         | 141.397       | O4        |
| OMEXIQ         | 141.778       | O22       | WENDEA         | 141.563       | O7A       | QICTEC         | 141.395       | O2D       |
| ACUGUD         | 141.775       | N1        | KIBZAX         | 141.558       | CI2       | JIPVUD         | 141.392       | O4Q       |
| HATCEN         | 141.773       | O1        | NAZZOG01       | 141.55        | O12       | XOYDEX         | 141.39        | O1C       |
| POLDOL         | 141.768       | O11       | TUJWED         | 141.549       | O5        | SIZGEQ         | 141.387       | CI7       |
| ITOBZ          | 141.767       | O5C       | QAKFOA         | 141.543       | O3        | FIKNIX         | 141.386       | O14       |
| RECKOD         | 141.757       | N2        | CORCIX         | 141.541       | O5        | QASZOC         | 141.381       | O6        |
| XOJXIE         | 141.753       | O9B       | TOLMUF         | 141.538       | O10       | VUMNAU         | 141.38        | O4        |
| AXOSOY         | 141.749       | O2        | MARDAN         | 141.532       | O6        | JEVCAP         | 141.378       | O3        |
| DICDIG         | 141.748       | N3        | WUPTEI         | 141.528       | O6        | IFABIA03       | 141.376       | O3        |
| GIKRIF         | 141.747       | O8        | TUJJO          | 141.522       | O7        | OTAMEC         | 141.376       | O4        |
| MEMXAD         | 141.744       | O1        | EMECUV         | 141.521       | O14       | NAHHUB         | 141.372       | O3        |
| IXOQOE         | 141.735       | O21       | WENTAN01       | 141.52        | O11       | NOPCOK         | 141.362       | CI2       |
| XINTAS         | 141.733       | O20       | FASWED         | 141.517       | O22       | UXIFAJ         | 141.361       | O20       |
| AGOHOV         | 141.725       | O3        | QIBNOE01       | 141.516       | O1A       | MAPLIA         | 141.357       | O16       |
| HEJMUI         | 141.714       | O2        | MUHHUT         | 141.512       | O5        | QENFAR         | 141.349       | O1        |
| LUKRIT01       | 141.699       | O1        | YUTGIF         | 141.512       | O5        | NOPCOK         | 141.346       | CI2       |
| GECXUH02       | 141.688       | O2        | WENDEA         | 141.511       | O10       | NUWWIM         | 141.337       | O3        |
| DEBSUZ         | 141.682       | O24       | OPOZAV         | 141.51        | O4F       | DUZQOG         | 141.335       | O3        |
| LECWEX         | 141.675       | F11       | XELNOS02       | 141.51        | O6        | GECXUH01       | 141.334       | O3        |
| GASSUR         | 141.673       | O1D       | NOFHUM         | 141.504       | O6        | YUXWEV         | 141.33        | O8A       |
| UTUBAP         | 141.67        | O2        | GEHYEB         | 141.503       | O7        | BOPZAJ         | 141.327       | N2        |
| CAGLAB         | 141.661       | N5        | MARDAN         | 141.501       | N29       | REYCIJ         | 141.322       | O13       |
| OQEYUG         | 141.653       | O11       | KEHNIW         | 141.499       | O15A      | NANHAO         | 141.318       | O7        |
| UDOQAH         | 141.644       | O1        | POCQUU         | 141.499       | O14       | QIDQON         | 141.315       | O9        |
| LISXEU         | 141.643       | O10       | XIXPAW         | 141.499       | O9        | DAGXUF         | 141.312       | O11       |
| BECKEC         | 141.641       | O15       | KEDQOB         | 141.497       | O6        | MIMRAB         | 141.312       | O3        |
| BOYSIT         | 141.639       | O6        | MIQVEP         | 141.496       | O3        | KALJIU         | 141.285       | N2        |
| MIQSIR         | 141.632       | O9        | HAGJIK         | 141.493       | CI1       | JEQPEB         | 141.284       | O2        |
| LOZKES         | 141.628       | O5        | AGUJOC         | 141.482       | O6        | NEMTUV         | 141.284       | O3        |
| VEHLUQ         | 141.625       | O67       | MUYCOB         | 141.469       | O3        | FODGAI         | 141.283       | O2        |
| MIMRAB02       | 141.623       | O3        | RUDWUJ         | 141.469       | O6        | OXPTZN         | 141.274       | CI2       |
| FALMUC         | 141.617       | O3        | MEMXEH         | 141.467       | N4        | BUQROV         | 141.263       | O2        |
| TOPYEE         | 141.613       | N4        | PEJREE         | 141.461       | S1        | FITNIH         | 141.263       | O1B       |
| XIQVAV         | 141.608       | S7        | EYERAB         | 141.458       | O17       | SARCIA         | 141.26        | N3        |
| XELNOS         | 141.606       | O6        | MOHRAD         | 141.457       | O3A       | WINFEF         | 141.257       | CI2       |
| PIYJEQ         | 141.254       | O4        | TEYYIH         | 141.111       | O16       | RAHFIP         | 140.944       | O4C       |
| SAVGEF         | 141.253       | CI4       | GUJFIB         | 141.109       | O3        | GEVFAR         | 140.941       | O12       |
| JAVJIA         | 141.246       | O5        | LIHXUX         | 141.108       | O2        | MEZNR          | 140.941       | O14       |
| ACUGUD         | 141.242       | N1        | YEPKUC         | 141.107       | O8        | LASMEZ         | 140.936       | O27       |
| FEWREH         | 141.235       | O1E       | QELNOO         | 141.107       | Se1       | NEMVAD         | 140.936       | O7        |
| GUMWER01       | 141.233       | S2A       | ICOSIF         | 141.104       | N5B       | VARRUD         | 140.936       | O18       |
| GECXUH         | 141.227       | O2        | DUCKAQ         | 141.104       | O6        | OHUQAJ         | 140.935       | O15       |
| SOTJAN         | 141.227       | O21       | COKCEN         | 141.103       | O23       | BEQPAQ         | 140.933       | O7        |
| GARMAR         | 141.224       | O5        | OYOWIL         | 141.102       | N15       | LASMEZ         | 140.929       | O28       |
| MEGNUK         | 141.22        | N6D       | OXOGUG         | 141.102       | Se1       | ULUQAW         | 140.925       | O9        |
| DUDLUL         | 141.216       | CI5       | GUCQIH         | 141.101       | O3        | POCQUU         | 140.921       | O6A       |
| AFEJAX         | 141.216       | O3        | GOZGOT         | 141.098       | O1        | DUWGIN         | 140.92        | CI1       |
| MUJKEI         | 141.215       | O15       | ETOLEG         | 141.093       | O3B       | LEVPAE         | 140.919       | N3        |
| RIDWUX         | 141.209       | O30       | LIDWAA         | 141.089       | O33       | PUMGOV         | 140.918       | O15       |
| GECXUH03       | 141.208       | O2        | XEDLUP         | 141.082       | CI2       | UBOYOC         | 140.917       | CI3       |
| WOTREF         | 141.207       | O7        | IGOPAW         | 141.08        | O1        | TEGQEF         | 140.909       | O25       |
| AJOVUS         | 141.2         | O10       | LARXUB         | 141.077       | N2        | CORLOM         | 140.907       | O3        |

|                |               |           |                |               |           |                |               |           |
|----------------|---------------|-----------|----------------|---------------|-----------|----------------|---------------|-----------|
| VUJTIE         | 141.198       | N2        | GURPUG         | 141.076       | O9        | SOMPUI         | 140.903       | O21       |
| JESSUW         | 141.197       | O5        | KUHCIC         | 141.073       | O16H      | OCOKUM         | 140.9         | O2        |
| <b>Refcode</b> | <b>∠YZnLB</b> | <b>LB</b> | <b>Refcode</b> | <b>∠YZnLB</b> | <b>LB</b> | <b>Refcode</b> | <b>∠YZnLB</b> | <b>LB</b> |
| RAGVIH         | 141.195       | O11       | VAJHIA         | 141.072       | N1D       | URABIA         | 140.897       | O4A       |
| NENCOZ         | 141.194       | O3        | FAVHEQ         | 141.07        | O3        | GICTAN         | 140.896       | O8        |
| MOKZUJ         | 141.192       | O6        | HOPTIS         | 141.06        | N10       | LEHMUK         | 140.89        | O12       |
| GUMWER         | 141.188       | S1A       | QARVEL         | 141.054       | O5        | DOZFOO         | 140.886       | O10       |
| RERKUW         | 141.187       | O19       | QICTAY         | 141.052       | O4        | MUZVOS         | 140.882       | O25       |
| GANGIM         | 141.184       | O6        | TOTNAU01       | 141.052       | O14       | OQECUJ         | 140.877       | O15       |
| MEWPIQ         | 141.18        | O2P       | TAWVEU         | 141.051       | O8        | KUBNAX         | 140.872       | N4        |
| SOLYEA         | 141.178       | N2        | IDUFOF         | 141.049       | O8        | OYAZUL02       | 140.871       | O18       |
| ULEXER         | 141.178       | O7        | WEWVOM         | 141.049       | O4        | BOPHAR         | 140.865       | O7        |
| MONDUQ         | 141.172       | O7        | BAMWUJ         | 141.045       | F1        | GABXUE         | 140.86        | N1        |
| WETFIN         | 141.17        | O10       | OYOWIL         | 141.043       | N15       | NUWWIM         | 140.852       | O12       |
| HOGYIO         | 141.163       | O4A       | SAHFEN         | 141.042       | Cl2       | MOJKAY         | 140.85        | O61       |
| EHAMEH         | 141.162       | O7        | TEYED          | 141.035       | O16       | MIQVAL         | 140.849       | O5        |
| HAGHII         | 141.16        | O5        | OXOGUG         | 141.032       | Se3       | ERIRAZ         | 140.846       | N1        |
| CATBAD         | 141.159       | O10       | VAKTIO         | 141.017       | O14       | QARVEL01       | 140.845       | O5        |
| TIWSEZ         | 141.159       | O2        | EPEYII         | 141.016       | O16       | FAZSEH         | 140.841       | O9        |
| HUKSAK         | 141.154       | O15       | LIMDOE         | 141.008       | O5A       | SANVOT         | 140.835       | N2        |
| PUDZAQ         | 141.154       | O3        | AJOVUS         | 141.002       | O6        | FICBOM         | 140.833       | O1G       |
| OGUNIP         | 141.154       | F7        | TOTNAU         | 140.996       | O13       | IBUHIY         | 140.831       | Se5A      |
| MIXWUO         | 141.153       | O25       | HYZCZN         | 140.995       | N1        | WIHMIK         | 140.83        | S3        |
| UQUSAB         | 141.153       | O5        | RIRWUN         | 140.99        | O6        | MUYPIH         | 140.827       | O3        |
| WENTAN         | 141.149       | O11       | HOCCIO         | 140.978       | O29       | UKAWOV         | 140.826       | O7        |
| LUMLOW         | 141.146       | O4        | GEJBOQ         | 140.973       | O12       | YEJGOL         | 140.821       | N3        |
| FETPOM         | 141.143       | O12       | VIBJIA         | 140.972       | O59       | GLYZNS10       | 140.821       | O7        |
| MEVNEG         | 141.136       | N5        | LONRAK         | 140.967       | O11       | NELMEZ         | 140.815       | O5A       |
| YUQQEI         | 141.136       | O5B       | FEBFAU         | 140.96        | N9        | AROGIA         | 140.813       | N1        |
| UZAWAU         | 141.132       | O5        | FETPOM         | 140.958       | O16       | AFEJAX         | 140.813       | O2        |
| EVURUJ         | 141.13        | O2        | OKUXUQ         | 140.954       | O11       | XOFTAP         | 140.812       | O2        |
| FUJBIX         | 141.124       | O6        | MOTTUM         | 140.953       | O11       | RUZSUA         | 140.807       | O3        |
| CAYFUE         | 141.112       | O8        | EMEZIG         | 140.948       | O7        | UHEWEM         | 140.804       | N6        |
| QETFIF         | 140.801       | N3        | SIJLED         | 140.668       | O4        | LODQIF         | 140.515       | N6        |
| WUPTAE         | 140.794       | O7        | OXPAZN         | 140.666       | O5        | ROFLUW         | 140.513       | N2        |
| VEHMUS         | 140.793       | O5A       | SEGDIT         | 140.663       | N4        | JIWNOV         | 140.513       | O20       |
| VEZDIR         | 140.792       | Cl3       | DUHHIZ         | 140.658       | O4        | LIGVAY         | 140.513       | O10       |
| GECXUH         | 140.791       | O3        | LIMNOL         | 140.654       | N4D       | XUWGAY         | 140.511       | O1        |
| SOMNOA         | 140.79        | O2A       | NOPCOK         | 140.653       | Cl2       | ELIYUU         | 140.508       | N3        |
| FUPQOW         | 140.788       | O21       | NHBZZN10       | 140.651       | N2        | MEHZUU         | 140.506       | N2        |
| UIJULOC        | 140.785       | O4        | GECXUH03       | 140.651       | O3        | BUBLIV         | 140.501       | O9        |
| KEGTAU         | 140.782       | O5        | ALOKIV         | 140.65        | N4B       | IJUGOJ         | 140.491       | O1        |
| COLCUD         | 140.781       | O5        | UTAPIQ         | 140.648       | O1        | DIWREJ         | 140.49        | O2        |
| DAWQOK         | 140.776       | O4        | KUBTOR         | 140.646       | O9        | UJEYIT         | 140.49        | O12       |
| KEDBON         | 140.771       | O3        | SOLBAY         | 140.638       | O15A      | RADWOI         | 140.488       | O7        |
| TISGOR         | 140.766       | O1        | KILYAJ         | 140.627       | O14       | CUWNOA         | 140.487       | O4C       |
| KUCVEL         | 140.763       | O3D       | ZELPAL         | 140.624       | O1        | YINXAV         | 140.483       | O15       |
| UVIKAO         | 140.761       | O2        | CINPOG         | 140.62        | N10       | YACYUX         | 140.479       | O9        |
| SANVOT01       | 140.756       | N3        | BACMOJ         | 140.616       | N1        | UTIPUK         | 140.474       | O4E       |
| RAMRIJ         | 140.756       | O5        | UWADUTO1       | 140.616       | O6        | PUKLIT         | 140.471       | O5        |
| DAXXAE         | 140.754       | O3K       | HOXTUL         | 140.615       | O1A       | XECTEG         | 140.469       | O6        |
| QASZOC         | 140.75        | O8        | SARXAO         | 140.615       | O5C       | QANTIJ         | 140.467       | O3        |
| MUZWAF         | 140.747       | O11       | ITESUY         | 140.613       | O3        | RIRWUN         | 140.46        | O5        |
| SENFUP         | 140.743       | O5A       | SISTUN         | 140.613       | O2        | JANLUF         | 140.454       | N2        |
| BEPMIU         | 140.742       | O3        | NESGAU         | 140.603       | O3D       | PAPGIY         | 140.448       | Cl2       |
| XOHNEO         | 140.74        | O8        | ONIWAK         | 140.601       | O10       | YACFUE         | 140.44        | N5        |
| HAGQOV         | 140.727       | O8        | NARKEA         | 140.6         | O8        | MUDFEW         | 140.433       | O9        |
| LAFXUP         | 140.726       | O2        | IBICIH         | 140.598       | O3        | FOWQEQ         | 140.432       | O5        |
| WOSBUB         | 140.723       | N1A       | SOTTIH         | 140.592       | N2        | FUJYAN         | 140.43        | N2        |
| ETUXUM         | 140.721       | O3A       | IHAMAI         | 140.589       | N1        | QOMFEF         | 140.423       | O60       |

|                |               |           |                |               |           |                |               |           |
|----------------|---------------|-----------|----------------|---------------|-----------|----------------|---------------|-----------|
| HIKMUM         | 140.715       | N6        | VERSOB         | 140.589       | N8        | QUXVUB         | 140.415       | N4        |
| HATHET         | 140.715       | O4        | YEKWOE         | 140.589       | O1        | HIYNIN         | 140.412       | O7        |
| <b>Refcode</b> | <b>∠YZnLB</b> | <b>LB</b> | <b>Refcode</b> | <b>∠YZnLB</b> | <b>LB</b> | <b>Refcode</b> | <b>∠YZnLB</b> | <b>LB</b> |
| RUZPOR         | 140.714       | O2        | LUVBAH         | 140.588       | O2        | MIQVEP         | 140.411       | N4        |
| LEDLAJ         | 140.71        | O7        | DIHTAR         | 140.587       | O13       | VIRLAK         | 140.411       | O83       |
| COFCIL         | 140.707       | O14       | WENTAN         | 140.586       | N1        | IYOBUV         | 140.407       | N1        |
| SARZER         | 140.707       | S2        | XEYSOM         | 140.582       | O9        | YEFKAY01       | 140.407       | O6        |
| AVAVUQ         | 140.702       | O12       | JIWPAJ         | 140.58        | O28       | ZOCFAB         | 140.406       | O3A       |
| HEJMOC         | 140.699       | O2        | CODQOC         | 140.579       | S1        | NIRRUE         | 140.404       | O2        |
| MULKOT         | 140.699       | O12       | GECXUH01       | 140.577       | O2        | KIKZAG         | 140.401       | O15       |
| XEKYOE         | 140.697       | O3        | GICLUB         | 140.575       | O30       | FEDYEU         | 140.391       | O8        |
| YOHZOL         | 140.693       | N5        | XARZUN         | 140.57        | O19       | RAXNAH         | 140.391       | O8        |
| WOGHUV         | 140.691       | N1        | AQUHIG         | 140.569       | O5        | CAYWEG         | 140.388       | O19       |
| WEKLOP         | 140.686       | N1        | ETUCOM         | 140.569       | O6        | LAVWIO         | 140.384       | C1        |
| AXOSOY         | 140.686       | O3        | LOQLAF         | 140.567       | O1        | MAKHAH         | 140.383       | N13       |
| REGQUT         | 140.685       | O11       | VARZEV         | 140.563       | O1        | EHEWIY         | 140.381       | O9        |
| ZISCCEM        | 140.683       | N3A       | SADFAH         | 140.558       | O2        | ROGMEG         | 140.379       | O30       |
| IZOWAW         | 140.68        | O27A      | BAVYON         | 140.55        | O3B       | UWADUT01       | 140.376       | S2        |
| NOHDOG         | 140.68        | O2        | LEHNAR         | 140.547       | O11       | RACYAW         | 140.371       | O5        |
| SOFZAP         | 140.676       | O5        | ARIFIQ         | 140.538       | O8        | DONREE         | 140.364       | O11       |
| AJEDEZ         | 140.672       | O7        | UMAWOV         | 140.535       | O15       | QQQAZD01       | 140.36        | O3        |
| TIWROI         | 140.669       | N7        | SICMOJ         | 140.533       | N2        | YEFKAY         | 140.346       | O6        |
| DISWOU         | 140.668       | O6        | ALOKIV         | 140.528       | N2B       | IBICAZ         | 140.344       | O3        |
| LIMNOL         | 140.338       | O1        | SACYII         | 140.18        | O4        | MOJKAY         | 139.985       | O75       |
| QUXVUB         | 140.337       | N4        | MOFWUA         | 140.176       | O7        | KUBZIR         | 139.98        | O7        |
| ZEQQEU         | 140.332       | O4        | WIRCUX         | 140.175       | O6        | QUFFED         | 139.972       | O1B       |
| VAJMAV         | 140.331       | O22       | SOWCOY         | 140.169       | O1B       | HOVJEK         | 139.959       | O5        |
| XATPUD         | 140.329       | O7        | SUVWIR         | 140.159       | O6        | DUQZOH         | 139.951       | O7        |
| POCGIZ         | 140.328       | C1F       | LETRUB         | 140.158       | O4        | LEDVOJ         | 139.951       | O6        |
| VIZSEE         | 140.322       | N5        | HAZQIJ         | 140.148       | N2        | NIQREK         | 139.951       | O2        |
| JONXIV         | 140.317       | N11       | GILFUF         | 140.148       | O3F       | QUBLAB         | 139.947       | O2        |
| WENWUI         | 140.313       | O3D       | JEXXUG         | 140.146       | N9        | CAHJII         | 139.944       | O7        |
| PIDMEV01       | 140.312       | O6A       | KILXUC         | 140.144       | O26       | MUZVUY         | 139.942       | O10       |
| BEQSUP         | 140.308       | N3        | RUPZIM         | 140.137       | N2        | SEBBAF         | 139.94        | O19       |
| JABKAY         | 140.303       | O2        | HUKSAK         | 140.136       | O14A      | MULQOA         | 139.939       | O13       |
| MOHLEB         | 140.302       | O5        | LORKUZ         | 140.132       | N7        | IGAWET         | 139.938       | O6        |
| OMIDAQ         | 140.299       | O10       | KAPWUV         | 140.131       | O12       | NAKLET         | 139.927       | N7        |
| LELDEM         | 140.297       | O2        | YEKVAP         | 140.126       | O4F       | SIHLAZ         | 139.925       | O16       |
| KUKHEF         | 140.294       | O14       | TEFQUQ         | 140.122       | O1        | CUQRUD         | 139.923       | N1D       |
| JAVCEP         | 140.293       | O10       | HUPXUM         | 140.121       | O3        | POCQUU         | 139.921       | O10       |
| XIGMEH         | 140.29        | N5        | LEVCAU         | 140.117       | O2        | MIGXEI         | 139.92        | O4B       |
| WIGTEP         | 140.287       | O2B       | AWIGAQ         | 140.116       | O29       | MIQVAL         | 139.917       | N4        |
| QUWHOG         | 140.283       | O1        | OGOWEN         | 140.114       | O10       | FAKTOD         | 139.916       | O8        |
| JIWNIP         | 140.281       | O20       | LESFAT         | 140.108       | O2        | FODZAA         | 139.916       | O10       |
| QASZOC         | 140.279       | O8        | TIKXET         | 140.107       | O3        | ASUXUJ         | 139.911       | O12       |
| NOHFAU         | 140.275       | O7        | PUPVEC         | 140.105       | N7        | DEKGAD         | 139.904       | O3        |
| GASSUR         | 140.264       | O2E       | HIQVUZ         | 140.104       | O1        | MIQVEP         | 139.903       | O5        |
| REYCIJ         | 140.261       | O7        | GEVFAR         | 140.103       | O12       | MORLIR         | 139.894       | O4C       |
| VIXVIJ         | 140.261       | O4        | YACFUE         | 140.101       | N4        | DOVHEB         | 139.886       | O4        |
| QUIJAZ         | 140.259       | O4B       | PAHROG         | 140.097       | O8        | RANQAA         | 139.879       | O2        |
| QUMJOZ         | 140.258       | N2        | BINBAE         | 140.095       | N9        | UMAWOV         | 139.877       | O11       |
| DEFGAY         | 140.253       | N3        | RAMRUV         | 140.094       | O5        | GARVAZ         | 139.876       | N3        |
| WENTAN01       | 140.249       | N1        | DASPUJ         | 140.093       | O15       | AWEJOE         | 139.875       | O6        |
| UKEHOJ         | 140.246       | O9        | KAPWUV         | 140.091       | O68       | VAXVUL         | 139.871       | C12       |
| FURDEB         | 140.244       | O21       | ASEROI         | 140.088       | O9        | ULIBOG         | 139.871       | O1        |
| POMNAI01       | 140.242       | N4        | GEFSIW         | 140.085       | O4        | RAMSAC         | 139.868       | O6        |
| WALCET         | 140.241       | O7        | XIZGAO         | 140.081       | O3        | JIQDUM         | 139.866       | O7        |
| RUDMUZ         | 140.236       | O4        | IXOSOE         | 140.075       | O6        | PAKVOM         | 139.853       | O7        |
| JEXXUG         | 140.236       | S1        | QARBOC         | 140.07        | N7        | JOBYEG         | 139.847       | N2        |
| POMNAI         | 140.234       | N6        | NOVQOH         | 140.058       | O2        | XIXPIE         | 139.84        | O11       |

|                |               |           |                |               |           |                |               |           |
|----------------|---------------|-----------|----------------|---------------|-----------|----------------|---------------|-----------|
| BAMZAR         | 140.231       | O5        | IKAVEX         | 140.048       | N3B       | MODZIR         | 139.839       | O34       |
| FOWQEQ         | 140.23        | O8        | VIGBAQ         | 140.045       | O6        | JUFFUN         | 139.837       | O10       |
| <b>Refcode</b> | <b>∠YZnLB</b> | <b>LB</b> | <b>Refcode</b> | <b>∠YZnLB</b> | <b>LB</b> | <b>Refcode</b> | <b>∠YZnLB</b> | <b>LB</b> |
| IWORET         | 140.228       | O6        | JIWKOQ         | 140.038       | N16       | KANQEW         | 139.835       | N4        |
| IDOHES         | 140.227       | N4        | TEFQOL         | 140.034       | O3        | WUTFAS         | 139.823       | O4        |
| AQIFOW         | 140.22        | O10       | WUPTEI         | 140.034       | O9        | IQIBAN         | 139.822       | O18       |
| DATFUZ         | 140.215       | O2        | XASCUQ         | 140.022       | O7        | MOSNEN         | 139.817       | O10       |
| ENANAJ         | 140.215       | O9I       | SIFPEF         | 140.02        | O24       | GOSPOV         | 139.811       | S4        |
| COTJUT         | 140.212       | O8        | IHITUP         | 140.017       | N4        | OMEBIS         | 139.81        | O1        |
| SEGHER         | 140.208       | N6        | ENUQIO         | 140.014       | O4        | HESPOK         | 139.807       | N3        |
| XIQFIO         | 140.198       | O1A       | YOGTIA         | 140.014       | O1        | HESPOK10       | 139.807       | N3        |
| DUCKAQ         | 140.188       | O2        | VADCAI         | 140.008       | O5        | IXOQOE         | 139.806       | N37       |
| VAVBUQ         | 140.184       | N4        | LARXUB         | 140.002       | N4        | CUYTUM         | 139.8         | O13       |
| QUBKII         | 139.791       | O2        | EVURUJ         | 139.607       | O7        | XIXPAW         | 139.421       | O9        |
| LASMEZ         | 139.788       | O26       | NUFBIB         | 139.603       | O2        | TEXDAF         | 139.419       | N4        |
| MOHRAD         | 139.788       | O2        | BUQROV         | 139.601       | O2        | JIWNIP         | 139.408       | O6        |
| HOQZUJ         | 139.787       | O2D       | HIKKOC         | 139.596       | O4        | ASIZAG         | 139.395       | O8        |
| ZAWHIQ         | 139.785       | O12       | VUFBUU         | 139.59        | C12       | DEBSUZ         | 139.392       | O12       |
| ZIJZEZ         | 139.783       | O12       | MALFOU         | 139.59        | O10       | PIDMEV01       | 139.388       | O4C       |
| SUPGAO         | 139.782       | O1B       | IJEDIL         | 139.589       | O15       | GAKQER         | 139.382       | O4        |
| VIRJEN         | 139.781       | F5        | KOGGIX         | 139.588       | O3        | AQIFOW         | 139.381       | O9        |
| MUHVIW         | 139.776       | O3C       | DAYPUQ         | 139.584       | C11       | SUZGOM         | 139.367       | O2C       |
| HEXGUO         | 139.773       | O9        | SUWZOC         | 139.578       | O43       | RUPCIQ         | 139.366       | F34       |
| JAYJOJ         | 139.772       | O11       | AYISEH         | 139.577       | O5        | POLYEW         | 139.365       | N2        |
| TABSIA         | 139.769       | O3        | SOVTOO         | 139.571       | O7        | UKIMEI         | 139.364       | O3        |
| HOQZUJ01       | 139.763       | O1D       | SOVTOO01       | 139.571       | O7        | RAFZIJ         | 139.362       | F4        |
| QAVBIA         | 139.763       | O5B       | VIZPAY         | 139.568       | O20       | VEZJUI         | 139.352       | N3A       |
| MORLIR         | 139.749       | O3        | NIPWIT01       | 139.566       | O2        | PUDCEY         | 139.341       | N4        |
| VIZPAY         | 139.748       | O19       | WOTREF         | 139.563       | O10       | JISNEF         | 139.34        | C11       |
| JUKHII         | 139.745       | O6A       | NIPWIT         | 139.556       | O2        | HIQNAY         | 139.337       | O10       |
| OFUNOW         | 139.743       | O8        | XOMMIX         | 139.553       | O1A       | PETFON         | 139.335       | O4A       |
| VAJLID         | 139.743       | O11       | WARCOJ         | 139.547       | N14       | ATAHAE         | 139.333       | O2A       |
| OCEYEB         | 139.737       | O2        | FISCEQ         | 139.546       | O7        | IGUMEF         | 139.328       | O5A       |
| XOHNEO         | 139.736       | O5        | LUZDOB         | 139.535       | O32       | LIZYUQ         | 139.325       | N20       |
| POFLED         | 139.733       | N10       | RASFID         | 139.535       | O7        | JIWNOV         | 139.325       | O6        |
| IQUMIQ         | 139.733       | O8        | KEDRAO         | 139.527       | O7        | MIXLAI         | 139.321       | O3        |
| MAGBIH         | 139.729       | O11       | NAFHAE         | 139.525       | O1        | HOGYIO         | 139.316       | O2        |
| HIKMOG         | 139.727       | N4        | HIQREF         | 139.523       | O4        | AWIGAQ         | 139.314       | O27       |
| WITFEM         | 139.723       | O8        | IKEMUI         | 139.522       | O2        | RADWOI         | 139.312       | O2        |
| QUXVUB         | 139.712       | N2        | RUZPOR         | 139.521       | O5        | RILWOA         | 139.308       | O10       |
| TERQEM         | 139.705       | O3        | MACHIJ         | 139.505       | O10J      | XUQH0H         | 139.306       | O13       |
| UJAPOL         | 139.704       | O4        | TADCUA         | 139.505       | O4A       | YUPKAW         | 139.304       | O2        |
| JUGXER         | 139.698       | O4B       | TERQEM         | 139.505       | O3        | SUPGAO01       | 139.301       | O2B       |
| QOMFEF         | 139.695       | O39       | ALUXEM         | 139.504       | O9        | JIWKOQ         | 139.292       | N19       |
| SARCIA         | 139.692       | N6        | GOWHEI         | 139.497       | O1        | ENUDEX         | 139.285       | O7B       |
| YACSOM         | 139.692       | O6        | KIYBED         | 139.493       | O5        | QAGFAF         | 139.279       | N5        |
| KEHTOJ         | 139.684       | O7F       | LAVWIO         | 139.489       | O10       | UPOZEG         | 139.275       | O21       |
| KIWZOJ         | 139.678       | O14       | TUMREA         | 139.487       | O6        | XAGQAZ         | 139.27        | O6        |
| TIVJIT         | 139.673       | O36       | EFOBIN         | 139.485       | O4        | BIZFUL         | 139.265       | O9        |
| SARZER         | 139.665       | S3        | IMIHUH         | 139.482       | S3        | GOJHUJ         | 139.26        | O4B       |
| XOZJOL         | 139.663       | O10       | WITWEE         | 139.469       | O7        | LECMOW         | 139.26        | O2        |
| HUZDUD         | 139.659       | O5        | OPAZN          | 139.468       | O7        | JEQPEB         | 139.258       | N2        |
| NEPPAZ         | 139.653       | O17       | OFUNOW         | 139.465       | O3        | FEDYAQ         | 139.256       | O8A       |
| ICUPUV         | 139.647       | O9        | GLYZNS10       | 139.462       | N3        | GAYZIP01       | 139.255       | N2        |
| HOHGAN         | 139.638       | O3        | QUJZAZ         | 139.462       | O1        | CAWLIY         | 139.255       | O1B       |
| LASMEZ         | 139.636       | O29       | VAJLID         | 139.449       | O16       | SOCGOJ         | 139.252       | O2        |
| QOPNOA         | 139.635       | N1        | CADCOD         | 139.446       | O6        | QOYZUC         | 139.25        | N6        |
| RICDIR         | 139.63        | N6H       | UKEZIV         | 139.442       | O3        | AYISEH01       | 139.231       | O5        |
| BODQAP         | 139.624       | O13       | NUDNIL         | 139.441       | O12       | FURDEB         | 139.221       | O17       |
| BOPHAR         | 139.623       | O8A       | USITOG         | 139.438       | O7        | NIYNUG         | 139.221       | O5        |

|                |               |           |                |               |           |                |               |           |
|----------------|---------------|-----------|----------------|---------------|-----------|----------------|---------------|-----------|
| NUHBOI         | 139.619       | N1        | ERIKOG         | 139.43        | O4        | YEFBOC         | 139.217       | S1        |
| QETBOG         | 139.61        | O7        | ESIRII         | 139.429       | O3        | NELMEZ         | 139.216       | O6C       |
| <b>Refcode</b> | <b>∠YZnLB</b> | <b>LB</b> | <b>Refcode</b> | <b>∠YZnLB</b> | <b>LB</b> | <b>Refcode</b> | <b>∠YZnLB</b> | <b>LB</b> |
| VIJNUZ         | 139.215       | O1        | BUQZOD         | 139.088       | N3F       | DEQFOX         | 138.945       | O8        |
| MAVZEP         | 139.206       | S1        | IJIVIH         | 139.086       | O16       | ZIHWIZ         | 138.942       | F33       |
| QAHNUK         | 139.205       | O2        | DEYVUA         | 139.084       | O4B       | ICUFIW         | 138.936       | O3        |
| UKEHOJ         | 139.202       | O24       | WUPTAE         | 139.083       | O16       | KIXLAG         | 138.934       | O21       |
| SIBYAG         | 139.199       | O5        | EKOLOG         | 139.082       | O4A       | VARRUD         | 138.932       | O12       |
| FEBFAU         | 139.188       | CI2       | PASDEU         | 139.08        | O2        | WEZNUM         | 138.932       | O5        |
| PIKYOY         | 139.182       | S1        | WEXHIS         | 139.077       | O17       | TEXDEJ         | 138.93        | N4        |
| JIQPAA         | 139.178       | N7        | WURQUW         | 139.075       | O1        | LAVWIO         | 138.93        | O3        |
| DUPRAI         | 139.175       | O5        | FASWED         | 139.073       | O19       | GOKXOT         | 138.927       | S1        |
| VODMAD         | 139.175       | O3        | MIWJOU         | 139.071       | N4        | DEHFIH         | 138.914       | O5        |
| RUNVEC         | 139.17        | O3        | NEVHOL         | 139.058       | O10       | SIYQOH         | 138.908       | O1        |
| DOCKOW         | 139.169       | N4        | NOLYIW         | 139.058       | O3F       | USITIA         | 138.903       | O2        |
| XANVIR         | 139.167       | CI1       | RAHFIP         | 139.058       | O4        | WIZGUI         | 138.895       | O6        |
| HIYNIN         | 139.166       | O1        | HEJMOC         | 139.056       | O5        | TUMDAI         | 138.892       | O6        |
| NUWPAZ         | 139.164       | O6B       | WAVDAY         | 139.056       | O4        | LEVDUL         | 138.889       | O4        |
| BOYSEP         | 139.163       | N3        | GAYZIP         | 139.046       | N1        | LIDBEI         | 138.888       | F5        |
| RUDROA         | 139.162       | O2        | YUXWEV         | 139.04        | O2A       | YOTVIO         | 138.883       | S1        |
| WUSFAU         | 139.161       | O1        | HUZZUY         | 139.037       | N5        | KOQJIL         | 138.876       | O5        |
| YOQYIN         | 139.16        | N1F       | UVUWAL         | 139.034       | S2        | VIQMEO         | 138.871       | O2        |
| IKAVEX         | 139.155       | N1A       | LEHNAR         | 139.033       | O12       | IGUGAT         | 138.869       | O3        |
| AJIGEG         | 139.155       | O19       | GUQTOB         | 139.029       | O5A       | BASZUU         | 138.868       | O52       |
| GILFUF         | 139.155       | O4G       | GEFSIW         | 139.027       | O3        | AWEYAE         | 138.863       | O5C       |
| UJUCIM         | 139.155       | O10       | QIDREE         | 139.025       | O6        | AGAWUA         | 138.855       | O2        |
| ROBQAB         | 139.153       | O1A       | FAKTOD         | 139.021       | O13       | KEYPAG         | 138.855       | O4        |
| ZUTNUZ         | 139.152       | O1        | REFLEV         | 139.019       | O3        | NINSOW         | 138.855       | O7        |
| KIDTOH         | 139.15        | N2        | GAYZOV         | 139.014       | O3        | KUBVOT         | 138.854       | O2        |
| GAHXEU         | 139.15        | O12       | DEBSUZ         | 139.012       | O24       | DEHPOX         | 138.853       | O7        |
| PIBHUF         | 139.15        | O6        | MULQOA         | 139.012       | O2        | QIBNOE01       | 138.853       | O8        |
| CEZVIO         | 139.148       | O4        | YOVVIQ         | 139.004       | O6        | SIJHUR         | 138.851       | O4        |
| YUXQIT01       | 139.147       | O4        | WUSFAU         | 139.002       | N1        | JAZKII         | 138.847       | O4C       |
| DEKGAD         | 139.146       | O15       | OKUXUQ         | 138.999       | O11       | PEJPOL         | 138.845       | O8        |
| GIXPAG         | 139.145       | O4        | IGUDEV         | 138.991       | N3        | QUZWEO         | 138.842       | O5        |
| ULEXER         | 139.144       | O8        | YUXQIT02       | 138.988       | O2        | UZIDAJ         | 138.84        | O6        |
| KUTRUO         | 139.141       | O11       | KIGBIL         | 138.978       | N2        | TEGRUS         | 138.837       | O3        |
| ROBQAB         | 139.137       | O13A      | NACZIE         | 138.977       | O12       | CAHJII         | 138.836       | O6B       |
| FEBYIW         | 139.136       | O5        | GOCMUI         | 138.976       | O2        | HOZRUM         | 138.835       | O1A       |
| VEGSAF         | 139.136       | O1        | PEWGOO         | 138.972       | O7        | PAVZES         | 138.831       | O3        |
| BEPPAP         | 139.135       | O3        | VIRLAK         | 138.971       | O81       | QIDRII         | 138.831       | O5        |
| UMAMOM         | 139.133       | N2        | HEBRIR         | 138.966       | N3        | XUYXEV         | 138.831       | O5        |
| KEXWOA         | 139.133       | O4        | VOPTAX         | 138.965       | O5        | AMUWOV         | 138.83        | CI5       |
| USITOG         | 139.126       | O3        | ZIFCUO         | 138.965       | O15       | PUDBAT         | 138.823       | N21       |
| PUMGOV         | 139.124       | O31       | IQEYOU         | 138.963       | O2        | GUBQOM         | 138.822       | N3C       |
| VIBJEW         | 139.12        | O12       | ALONEU         | 138.959       | N20       | MIBJAK         | 138.822       | O1        |
| YAXJEP         | 139.119       | Te6A      | COWCAU         | 138.958       | O2        | CIRGAP         | 138.821       | O8        |
| XAGQAZ01       | 139.117       | O7        | WENTAN01       | 138.953       | O2        | OKUXUQ         | 138.806       | O4        |
| EMOJUM         | 139.102       | O7        | XUXQAJ         | 138.952       | O1        | TUFJAG         | 138.806       | O2        |
| YUXQIT         | 139.1         | O5        | ASIYUZ         | 138.95        | O2        | WINFEF         | 138.804       | CI4       |
| KEMKET         | 139.094       | O17       | PIDMEV         | 138.949       | O6A       | NAHHUB         | 138.804       | O18       |
| JEBTIU         | 139.091       | O10       | QOTWEE         | 138.945       | N5        | ECEZEV         | 138.801       | O12       |
| WISVUR         | 138.798       | N2        | CAVFEN         | 138.619       | O2        | POTWAZ         | 138.418       | O23       |
| KARXIL         | 138.798       | O2        | FAKXAT         | 138.617       | O2        | DINDIP         | 138.417       | O9A       |
| AJOVUS         | 138.795       | O7        | MOJKAY         | 138.616       | O59       | GARTID         | 138.415       | O6        |
| BAMWUJ         | 138.786       | F4        | BIZFUL         | 138.615       | O9        | TECPAW         | 138.414       | N6        |
| VENMIL         | 138.781       | O6        | KAVVUA         | 138.614       | O3D       | RIHDUJ         | 138.408       | O2        |
| DIHNEO         | 138.78        | O9        | YIMWAU         | 138.612       | O2        | LIMNOL         | 138.406       | N2A       |
| VUPQON         | 138.78        | O3        | IXOQOE         | 138.611       | O15       | FAHJAB         | 138.406       | O3        |
| DORRAG         | 138.778       | N9        | EXETIN         | 138.606       | O8        | CIHJOU         | 138.404       | O7A       |

|                |               |           |                |               |           |                |               |           |
|----------------|---------------|-----------|----------------|---------------|-----------|----------------|---------------|-----------|
| GIXPIQ         | 138.778       | O12       | OKIHUO         | 138.605       | O4        | LUNBIF         | 138.403       | O4        |
| WENTAN         | 138.777       | O7        | FAFWEQ         | 138.596       | O1        | TILQAH         | 138.392       | Cl1       |
| <b>Refcode</b> | <b>∠YZnLB</b> | <b>LB</b> | <b>Refcode</b> | <b>∠YZnLB</b> | <b>LB</b> | <b>Refcode</b> | <b>∠YZnLB</b> | <b>LB</b> |
| QIBNOE         | 138.773       | O9A       | GUCQIH         | 138.581       | O10       | TENLUX         | 138.391       | O4B       |
| FESTEG         | 138.771       | O6        | ZODGEH         | 138.572       | O3        | SOFPOV         | 138.379       | S2        |
| GESNAW         | 138.766       | N4        | YEFQOR         | 138.569       | F6        | KAWXUB         | 138.371       | O4        |
| AGUJUI         | 138.766       | O3        | JAZKII         | 138.567       | O3A       | GUCZAG         | 138.362       | O17       |
| XOLQIY         | 138.765       | O2        | MADQUG         | 138.567       | O2        | OKUXUQ         | 138.355       | O5        |
| RIDWUX         | 138.76        | O26       | RAMROP         | 138.566       | O8        | OYOWIL         | 138.35        | N11       |
| MAVNUU         | 138.758       | O4        | RUSFOC         | 138.563       | N20       | LEKNUN         | 138.347       | O1B       |
| NENXUC         | 138.745       | O8        | XIDBOF         | 138.561       | O9        | ROYIYI         | 138.347       | O4        |
| HOZRUM         | 138.744       | O4A       | CESQUP         | 138.56        | O6C       | IDOHES         | 138.343       | N6        |
| LOWGIQ         | 138.743       | N3        | PASDEU         | 138.558       | O11       | YEFVAI         | 138.337       | Cl2       |
| ORUMIY         | 138.74        | N3        | BOVLAA         | 138.557       | O6        | XECTEG         | 138.332       | O3        |
| QETFIF         | 138.73        | O5        | LUWSIF         | 138.557       | O5        | NAKPUM         | 138.32        | O1        |
| HUBMID         | 138.729       | O1        | JOFDUG         | 138.556       | O2E       | OXUROQ         | 138.314       | O6        |
| SEBBAF         | 138.728       | O16       | CEQJER         | 138.55        | N14       | XELNOS         | 138.31        | O6        |
| BEMHAG         | 138.726       | O9        | HOXTUL         | 138.546       | O5        | XIXNUO         | 138.31        | O11       |
| KADXEU         | 138.724       | O5        | JESSUW         | 138.539       | O2A       | EBEZAQ         | 138.302       | O8        |
| IGAQEM         | 138.722       | O3F       | WISNET         | 138.537       | N2        | OYAPOV         | 138.302       | O4A       |
| XILGUU         | 138.717       | O6        | ROQKIT         | 138.522       | O5C       | QANZEL         | 138.299       | O4        |
| CATBAD         | 138.705       | O10       | OMIDAQ         | 138.518       | O1        | CIFBUQ         | 138.298       | O3        |
| RUGXIC         | 138.703       | N1        | LERVOV         | 138.497       | O7        | DORRAG         | 138.295       | N2        |
| LOCWAE         | 138.701       | O3        | ESEVON         | 138.492       | O6        | YAFTOO         | 138.285       | O3        |
| QIBNOE02       | 138.701       | O5A       | DILBIK         | 138.478       | O3        | DUDLOF         | 138.28        | I2        |
| XAXBOP         | 138.7         | O8        | SAEDZN10       | 138.478       | O2        | OKIJE          | 138.28        | O6        |
| IJUGOJ         | 138.695       | Cl2       | AWIGEU         | 138.476       | O25       | GETNUS01       | 138.277       | N2        |
| YULHAR         | 138.695       | O7        | ZNETAM10       | 138.463       | I1        | ZEJYAR         | 138.274       | N6        |
| PAXCAT         | 138.689       | N2        | LIJREC         | 138.463       | O1        | HANXED         | 138.272       | N4F       |
| NAPHOD         | 138.687       | O2        | SETRAN         | 138.456       | N3        | TOVSAA         | 138.263       | N8        |
| AVOKOM         | 138.683       | O9        | FODROG         | 138.455       | N6        | TURMUP         | 138.26        | S2        |
| UVIKES         | 138.677       | N4        | GUPBOK         | 138.45        | O1        | SACYII         | 138.259       | O3        |
| HOVJEK         | 138.675       | O2        | OXPAZN         | 138.449       | O10       | DAYNIE         | 138.255       | S2        |
| FOHNEY         | 138.675       | F1        | YANLAE         | 138.449       | O4        | XIZFAR         | 138.254       | Cl2       |
| CODVAV         | 138.671       | O11       | WEMPAG         | 138.447       | N3        | KARXIL         | 138.25        | O4        |
| AQOHAQ         | 138.661       | N3A       | XELNOS01       | 138.443       | O6        | TOJBIF         | 138.238       | O7B       |
| JIQPAA         | 138.661       | N3        | DAJIE          | 138.439       | O31       | MATKAX         | 138.238       | F9A       |
| SAHFEN         | 138.661       | O7        | WISVUR         | 138.433       | N4        | OMADOX         | 138.237       | N2        |
| ULEQEJ         | 138.66        | O3        | TEDLUK         | 138.431       | O4D       | EZEJOL         | 138.233       | O17       |
| LAXSAH         | 138.659       | O2        | INUGEE         | 138.427       | O1        | JIWNUB         | 138.222       | O24       |
| ONATUT         | 138.654       | N3C       | ZIHWIZ         | 138.427       | F31       | XINQAQ         | 138.22        | O2        |
| RAGVIH         | 138.652       | O7        | BOPZAJ         | 138.421       | O4        | ASALIP         | 138.218       | O1        |
| AWEYAE         | 138.218       | O1B       | ADEKEB         | 138.022       | O3        | ZUSJII         | 137.859       | O7        |
| IGUDEV         | 138.213       | N5        | MUZVOS         | 138.016       | Cl4       | SOXTUW         | 137.858       | O20       |
| OMEWOU         | 138.213       | N1        | XUXQEN         | 138.014       | O7        | NEYTOD         | 137.848       | O11       |
| CEBCUJ         | 138.211       | O5        | YEPKOW         | 138.01        | O7        | VIRLAK         | 137.847       | O82       |
| GAPDAE         | 138.21        | O13       | TOTMIB         | 138.007       | O21       | NACHOR         | 137.845       | O9        |
| DEFHUT         | 138.209       | O7        | XAPXOB         | 138.004       | O5        | QIBYUZ         | 137.844       | N6        |
| BEGZOE         | 138.203       | O1B       | OJUJIM         | 137.997       | N8        | QIBNOE01       | 137.843       | O10A      |
| MOJZUG         | 138.202       | O15B      | CAHHOL         | 137.989       | O8        | JIMGOE01       | 137.84        | N2        |
| UCEFER         | 138.196       | O5        | NEWZEX         | 137.979       | O2A       | FAVPEA         | 137.835       | O3        |
| NEKXOU         | 138.192       | O9        | AYISEH         | 137.978       | O1        | JONXIV         | 137.832       | O6        |
| JAIBOO         | 138.186       | O1        | HOPXAM         | 137.977       | O5A       | TOLHEI         | 137.829       | O9        |
| XELNOS02       | 138.185       | O6        | BINBAE         | 137.973       | O5        | GUVFUY         | 137.822       | O6        |
| LAXSAH         | 138.182       | O1        | FEBFIC         | 137.973       | O3        | ZETLER         | 137.822       | O5B       |
| MOTTUM         | 138.175       | O5        | PUDBIB         | 137.971       | N13       | IPAPEU         | 137.818       | O14       |
| GETNUS         | 138.17        | N2        | NEQDIW         | 137.969       | O2        | WESVAS         | 137.818       | O22       |
| DISWOU         | 138.165       | O8        | XIZGAO         | 137.962       | O3        | GOWMEM         | 137.816       | O5        |
| OFUNOW         | 138.163       | O9A       | WIJDAV         | 137.958       | O13       | BUZGUZ         | 137.813       | O2        |
| FISCEQ         | 138.161       | O7        | KATHUM         | 137.954       | O2        | FORWOA         | 137.81        | O25       |



|                |               |           |                |               |           |                |               |           |
|----------------|---------------|-----------|----------------|---------------|-----------|----------------|---------------|-----------|
| PIVGUZ         | 138.16        | O3        | COLBUB         | 137.952       | N13       | QIBNOE02       | 137.805       | O4A       |
| MIKYUE         | 138.154       | O3        | BUZGUZ         | 137.952       | O7        | ASEDEK         | 137.794       | O1A       |
| <b>Refcode</b> | <b>∟YZnLB</b> | <b>LB</b> | <b>Refcode</b> | <b>∟YZnLB</b> | <b>LB</b> | <b>Refcode</b> | <b>∟YZnLB</b> | <b>LB</b> |
| XIXPIE         | 138.154       | O11       | RERKUW         | 137.947       | O20       | NUJVAS         | 137.791       | O2        |
| LAVWIO         | 138.147       | O4        | YUVWOB         | 137.946       | O3        | CAPWAU         | 137.789       | O5        |
| DOCPIV         | 138.147       | F39       | FOTBUO         | 137.939       | O9        | GUWXIG         | 137.786       | O5        |
| NEYQUG         | 138.146       | N2        | ROGMEG         | 137.938       | O4L       | DEHFUR         | 137.783       | O6        |
| MUZWAF         | 138.142       | N6        | JIWNUB         | 137.937       | O29       | FAHNIN         | 137.783       | O6        |
| PAVZES         | 138.142       | O2        | MUDFEW         | 137.937       | O7        | MUMTOD         | 137.781       | CI2       |
| HUZZUY         | 138.141       | O5        | SOCNAB         | 137.937       | O9        | KOKBAO         | 137.774       | S1        |
| UVUFEY         | 138.13        | O2A       | QAKFOA         | 137.936       | O1        | COQGAS         | 137.772       | O5C       |
| VEGLOK         | 138.127       | O12       | NOZSIE         | 137.935       | N4        | QUFFED         | 137.772       | O4        |
| RAMHOC01       | 138.105       | O9        | LOQFEE         | 137.932       | O6        | ICUNUS         | 137.771       | O71       |
| JIWKOQ         | 138.101       | N22       | CEYGIY         | 137.916       | O10       | NOFLUR         | 137.771       | O22       |
| GIXPIQ         | 138.097       | N18       | SOVTOO         | 137.916       | O5        | JIMGOE         | 137.767       | N1        |
| SOTTIH         | 138.092       | N4        | SOVTOO01       | 137.916       | O5        | ZZZDVY04       | 137.767       | O10       |
| XELTOZ         | 138.09        | O3        | RUKZEE         | 137.905       | O3        | KAYHAT01       | 137.765       | O6        |
| GUVSEW         | 138.085       | O3B       | FONPUV         | 137.894       | O9        | KEDRAO         | 137.764       | O6        |
| VUSHIC         | 138.084       | O1        | SIHJEZ         | 137.894       | O2        | PIKYOY         | 137.762       | O4        |
| ZETLER         | 138.082       | O4C       | NEYTUJ         | 137.893       | O11       | EGIHOR         | 137.758       | O2        |
| FISZAK         | 138.077       | O10       | YEJBAS         | 137.889       | O5        | QIBNOE         | 137.755       | O4A       |
| HOJCOY         | 138.076       | O3        | XANMUV         | 137.883       | O6        | PAHTIE         | 137.751       | O19       |
| QAKFOA         | 138.075       | O10       | LIJGIY         | 137.88        | CI1       | BUZGUZ         | 137.748       | O5        |
| XUXQEN         | 138.066       | O8        | MUVVUW         | 137.88        | O9        | BINBAE         | 137.747       | N1        |
| DEHFUR01       | 138.064       | O18       | TEFKEV         | 137.879       | CI1       | NABMAF         | 137.744       | O8        |
| NAKPUM         | 138.061       | O14       | XUXPAI         | 137.878       | O4        | WUYHUU         | 137.744       | O2        |
| VIZSEE         | 138.052       | O7        | QUGWOF         | 137.872       | O3        | RIPLEJ         | 137.743       | O5        |
| NEQYIS         | 138.048       | S2        | NUFBIB         | 137.868       | O10       | YIZCUH         | 137.741       | O1        |
| MEGNUK         | 138.04        | O5C       | OKIJE          | 137.868       | O3        | CANLEJ         | 137.735       | O7        |
| WAJGAQ         | 138.038       | O4        | VIRLAK         | 137.867       | O72       | XULFEQ         | 137.728       | N1A       |
| HUBMID         | 138.031       | O3A       | VEHMUS         | 137.862       | O5A       | ZOJXAZ         | 137.725       | N9        |
| VAJSUW         | 138.03        | O6        | NEBNOZ         | 137.861       | O11       | TOLPIW         | 137.724       | N2        |
| PIJBAM         | 137.716       | O13A      | TOMKEN         | 137.562       | O12       | NEPMIF         | 137.37        | N5B       |
| RUZQOS         | 137.716       | O2        | TUFJAG         | 137.561       | O3        | IJIVIH         | 137.37        | O17       |
| IJIVIH         | 137.713       | O1        | ZIHWIZ         | 137.552       | F5        | MAKSUN         | 137.365       | O1        |
| SOWCOY         | 137.713       | O4E       | JUKHAA         | 137.544       | O6        | GAYZIP01       | 137.365       | S1        |
| SOCSEI         | 137.711       | O8        | MULKUZ         | 137.542       | O8        | GOTLIM         | 137.364       | O13       |
| HOJCOY         | 137.71        | O1        | GAYZIP         | 137.539       | S2        | XAXZIG         | 137.364       | O10       |
| KARDEO         | 137.703       | O5        | TIRTAQ         | 137.527       | O9        | YELFED         | 137.364       | O1        |
| INAKOZ         | 137.702       | N1B       | HIQVUZ         | 137.524       | O12       | EQERUP         | 137.363       | O1        |
| VOWXIO         | 137.701       | O6        | TAMZEQ         | 137.522       | S1        | GOBHUC         | 137.36        | O1A       |
| QUSVIJ         | 137.7         | O2        | EBEZOE         | 137.521       | O3        | MULKUZ         | 137.352       | O6        |
| FOZJAI         | 137.695       | O6        | FEBYIW         | 137.518       | O5        | OBUNEI         | 137.35        | O14       |
| BEVZUZ         | 137.691       | O8        | SOLYEA         | 137.516       | N3        | ICUBUE         | 137.347       | O4        |
| JIMGOE01       | 137.69        | N5        | XIXNUO         | 137.515       | O11       | RECKOD         | 137.344       | O2        |
| SEHFAO         | 137.685       | N3A       | ROPGIO         | 137.514       | F25       | SIJLIH         | 137.341       | O5        |
| BOVLAA         | 137.684       | O7        | BIZFUL         | 137.513       | O7        | FERFIU         | 137.34        | O10       |
| ECOZUT         | 137.684       | O14       | CAWSID         | 137.506       | CI12      | CACKEA         | 137.335       | O4        |
| ESASUN         | 137.678       | O6        | MOKTOW         | 137.505       | O4A       | ADUJUJH        | 137.333       | O18       |
| DEHFUR         | 137.677       | O23       | CEMPUJ         | 137.504       | O1        | NOXBEB         | 137.332       | O7        |
| TOTNAU01       | 137.676       | O16       | NEYVIZ         | 137.503       | O11       | HIQVUZ         | 137.329       | O10       |
| VENMIL         | 137.674       | O3        | ADUKES         | 137.501       | O17       | FASWED01       | 137.326       | O10       |
| QUJDAC         | 137.672       | O6        | PUDBAT         | 137.496       | N14       | XIBGOI         | 137.326       | O4        |
| ZZZDVY02       | 137.67        | O9        | HOJJIC         | 137.491       | O9        | FUJNAB         | 137.322       | O4I       |
| NEYVAR         | 137.664       | O11       | RAMHOC         | 137.491       | O2        | CINQAT         | 137.319       | N10       |
| LIXZUP         | 137.651       | O9        | XEHTUA         | 137.487       | O8        | ARAZAX         | 137.318       | O7        |
| NIJTIJ         | 137.644       | O4        | FAVPOK         | 137.484       | N11       | IJEDIL         | 137.314       | O2        |
| AGUJUI         | 137.636       | O5        | OKIJE          | 137.48        | O7        | JISJUT         | 137.313       | O7A       |
| YUVWOB         | 137.628       | O2        | DOZFOO         | 137.478       | O11       | PIJKAV         | 137.313       | O16       |
| ATOWUE         | 137.621       | O33       | DOZFOO         | 137.467       | N4        | JEXYAN         | 137.296       | N1        |

|                |               |           |                |               |           |                |               |           |
|----------------|---------------|-----------|----------------|---------------|-----------|----------------|---------------|-----------|
| XULFEQ         | 137.62        | O10       | SIXJER         | 137.467       | I1        | QQQAZD01       | 137.287       | O3        |
| NEYVEV         | 137.619       | O11       | WENDEA         | 137.464       | O10       | QANZEL         | 137.282       | O3        |
| <b>Refcode</b> | <b>∠YZnLB</b> | <b>LB</b> | <b>Refcode</b> | <b>∠YZnLB</b> | <b>LB</b> | <b>Refcode</b> | <b>∠YZnLB</b> | <b>LB</b> |
| LOZQEY         | 137.618       | O2        | RIBWEH         | 137.461       | CI1       | EVAVAY         | 137.281       | O1        |
| XACRUQ         | 137.618       | O4        | AHOMUH         | 137.46        | O4        | KAQGIV         | 137.28        | O11       |
| PIPKAC         | 137.615       | O21       | EBUBOV01       | 137.459       | O6        | SAHFEN         | 137.277       | O10       |
| SICDIT         | 137.615       | O1        | IQUMIQ         | 137.444       | O6        | YEMDIG         | 137.275       | O9A       |
| JIWPAJ         | 137.614       | O30       | ESoyUG         | 137.441       | N4        | FOWQEQ         | 137.274       | O8        |
| COTJUT         | 137.612       | O3        | AYISEH01       | 137.428       | O2        | GARVAZ         | 137.273       | N3        |
| BUQROV         | 137.606       | N2E       | BIZFUL         | 137.418       | O2        | EYEHEW         | 137.269       | CI2       |
| XUYXEV         | 137.605       | O7        | KICVAU         | 137.416       | O5        | ZUJZUB         | 137.265       | O10       |
| SETRER         | 137.6         | N3        | GICTAN         | 137.404       | O11       | MAZLOO         | 137.262       | O13       |
| BAMWOD         | 137.597       | O7        | CEBCUJ         | 137.403       | O1        | GINFAM         | 137.256       | O7        |
| UYAJIO         | 137.597       | O5        | BAZSII         | 137.393       | O5        | NEYWEW         | 137.255       | O12       |
| MUNKIR         | 137.596       | O3B       | GIQFOF         | 137.39        | O1A       | JESREF         | 137.25        | N5        |
| IVEQAB         | 137.595       | N6B       | IGAQIQ         | 137.39        | O3F       | IWORET         | 137.246       | O6        |
| KUHCIC         | 137.595       | O15       | SOCGOJ         | 137.384       | O3        | AXUQER         | 137.244       | N4        |
| UKIMEI         | 137.59        | O1        | KEBGIK         | 137.378       | O9        | YEPKUC         | 137.243       | O6        |
| CIVBAL         | 137.577       | O22       | ZAWTOI         | 137.378       | O3C       | OVIPAM         | 137.238       | N1        |
| YEJBAS         | 137.57        | O6        | CINPUM         | 137.371       | N10       | LESFAT         | 137.238       | O3        |
| KIKZAG         | 137.235       | O11       | QUCYUJ01       | 137.064       | CI1       | DUNXUH08       | 136.898       | O7A       |
| NEYQUG         | 137.232       | N8        | WENPIO         | 137.058       | O1        | DUNXUH21       | 136.896       | O5A       |
| EQOVIP         | 137.224       | F6        | HIYNIN         | 137.057       | O6        | ULOZIH         | 136.887       | O4        |
| ICUNUS         | 137.222       | O82       | ITELIE         | 137.056       | O7        | KIZGIL         | 136.883       | O18       |
| WOGTAQ         | 137.215       | N1        | ATEFIQ         | 137.054       | N3        | KAWHOG         | 136.882       | O6        |
| QUIJAZ         | 137.207       | O2        | CEBCUJ         | 137.054       | O2        | ELESIA         | 136.881       | O12       |
| TOBPOS         | 137.207       | O2        | JIWNOV         | 137.052       | O30       | WUPTAE         | 136.881       | O18       |
| KARSUS         | 137.204       | I4        | DUFJUM         | 137.05        | O3A       | SOLYEA         | 136.877       | N7        |
| SAEDZN10       | 137.203       | O3        | HOQCIB         | 137.047       | CI2       | GETNUS         | 136.876       | O1        |
| IJEDIL         | 137.189       | O8        | MUVVUW         | 137.045       | O12       | ILUSIS         | 136.867       | O1        |
| QEVDAZ         | 137.189       | S3A       | WIJDAV         | 137.045       | O11       | LUMCED         | 136.863       | O4        |
| HAHCIF         | 137.187       | O5        | XIQVAV         | 137.045       | S2        | NAHHIP         | 136.854       | O7        |
| NADCUS         | 137.187       | S1        | POMRIT         | 137.037       | O5        | RUWMED         | 136.852       | O76       |
| TEFQOK         | 137.184       | O7        | HUPXOG         | 137.034       | N1        | KAYPUW         | 136.847       | O7        |
| JIWNIP         | 137.181       | O30       | XAGQAZ01       | 137.034       | O7        | ZUGVEC         | 136.847       | O6        |
| GICMAI         | 137.178       | O29       | FIHYOM         | 137.032       | N3        | ONIWAK         | 136.846       | O1A       |
| HIQREF         | 137.178       | O3        | AGOHOV         | 137.031       | N2        | IWOPUF         | 136.845       | N5        |
| CUHKUN         | 137.176       | O1        | KIRMOR         | 137.025       | O11       | NOZSIE         | 136.842       | N2        |
| KIKZAG         | 137.176       | O7        | ZEBKAS         | 137.023       | CI2       | UKEZIV         | 136.841       | O3        |
| NEYVOF         | 137.175       | O11       | QANZEL         | 137.021       | O2        | WIRCUX         | 136.839       | O3        |
| RAFWUS         | 137.173       | O9        | RAFWUS         | 137.02        | O9        | ASUBIZ         | 136.838       | O6        |
| ETAXON         | 137.172       | O12       | AWIGAQ         | 137.018       | O27       | FUJNEF         | 136.835       | O11       |
| MUVVUW         | 137.171       | O3        | INAKOZ         | 137.017       | O1A       | MUDFEW         | 136.82        | O6        |
| DOMYUC02       | 137.17        | N3        | ODUSEL         | 137.009       | O22       | DITWEL         | 136.816       | N3        |
| TUFJAG         | 137.17        | O4        | KAQTAA         | 137.007       | O4B       | AZUCIH         | 136.815       | S1        |
| NAKPUM         | 137.161       | O2        | OZUNEF         | 137.005       | O2        | EYEDIY         | 136.811       | O6        |
| ECUGOA         | 137.152       | O8        | NARKEA         | 136.998       | O7        | ADEVOV         | 136.801       | N4        |
| NUWRIH         | 137.15        | S2A       | EQOVIP         | 136.992       | N3        | PAFWEY         | 136.801       | O1        |
| GAKQIV         | 137.146       | O4        | TAPRAG         | 136.988       | O4        | PAFWEY10       | 136.801       | O1        |
| LIGVAY         | 137.141       | O6A       | GIQYOY         | 136.987       | O3B       | GEHYEB         | 136.8         | O7        |
| COSBIW         | 137.136       | O4G       | NUDNIL         | 136.987       | O18       | VIRNUG01       | 136.797       | O5        |
| JUFHAV         | 137.13        | O2        | KUBSIK         | 136.978       | O5A       | ELESIA         | 136.794       | O13       |
| SEQHAY         | 137.128       | CI3       | YIZCUH         | 136.977       | O6E       | VIRNUG         | 136.789       | O4        |
| MAZVAK         | 137.128       | O6        | ODUSEL         | 136.974       | O19       | ADUKAO         | 136.778       | O18       |
| UHUVID         | 137.122       | O3        | VIBJIA         | 136.972       | O4        | CUWNOA         | 136.778       | O5        |
| DUZQOG         | 137.115       | O2        | ULEXER         | 136.963       | O2        | NEYWAS         | 136.776       | O12       |
| TATPUC         | 137.112       | O27       | LERVVOV        | 136.962       | O8        | VIZTAB         | 136.775       | N8        |
| SEQHAY         | 137.111       | N2        | IJEDOR         | 136.961       | O4        | PUMGOV         | 136.772       | O23       |
| TUMDAI         | 137.106       | O7        | USASEP         | 136.953       | O29       | ILIZOT         | 136.771       | O1        |
| BASZUU         | 137.1         | O43       | RAMHOC01       | 136.944       | O5        | NAMCUA         | 136.768       | O5        |

|                |               |           |                |               |           |                |               |           |
|----------------|---------------|-----------|----------------|---------------|-----------|----------------|---------------|-----------|
| ZIWLAS         | 137.096       | O1        | XUQNOM         | 136.941       | N5F       | LMETZN01       | 136.767       | N1        |
| IKAVEX         | 137.095       | N4        | RUWMED         | 136.94        | O50       | TUWPAF         | 136.766       | O5        |
| <b>Refcode</b> | <b>∠YZnLB</b> | <b>LB</b> | <b>Refcode</b> | <b>∠YZnLB</b> | <b>LB</b> | <b>Refcode</b> | <b>∠YZnLB</b> | <b>LB</b> |
| XAGBOZ         | 137.094       | N2        | LICXED         | 136.93        | O7        | MENLAS         | 136.764       | Cl1       |
| TAPQUZ         | 137.088       | O4        | YIKGIL         | 136.928       | O4        | DEZXUE         | 136.762       | O26       |
| IPOWUF         | 137.083       | N5        | PUXJAV         | 136.924       | Cl5       | NEYVUL         | 136.758       | O11       |
| QENFAR         | 137.082       | O1        | CAZFES         | 136.919       | O6        | TOBRIO         | 136.754       | O2        |
| QIDRAA         | 137.073       | O3        | EQECOV         | 136.914       | N4        | XOMHIQ         | 136.751       | O4        |
| SENJEB         | 137.072       | O6        | XELLIK         | 136.901       | N4        | SENJEB         | 136.748       | O6        |
| QOMFEF         | 137.065       | O53       | IXACUF         | 136.901       | O4        | NAKPUM         | 136.747       | O7        |
| DOMYUC01       | 136.744       | N2        | BIZFUL         | 136.496       | O8        | QAKFOA         | 136.325       | O8        |
| NEPPAZ         | 136.741       | O16       | ABAXIN         | 136.495       | N2        | JITNEJ         | 136.321       | O3        |
| LUMCIH         | 136.729       | O5        | ARAFOQ         | 136.495       | O7        | CUHKUN         | 136.32        | O2        |
| VENMIL         | 136.717       | O6        | NOXBK          | 136.488       | O14       | GIWHAW01       | 136.314       | Cl1       |
| ALUXEM         | 136.716       | O10       | KEPGOF         | 136.486       | O11       | TOLMUF         | 136.313       | O5        |
| GETNUS01       | 136.711       | O1        | ZUTNUZ         | 136.486       | O5        | KIPLUT         | 136.31        | N3B       |
| REHGAN01       | 136.711       | O5        | DASSIZ         | 136.481       | Cl2       | ALUXEM         | 136.303       | O5        |
| CEXTAB         | 136.709       | O3        | NABMAF         | 136.47        | O8        | KIPSOV         | 136.302       | O6        |
| KOZLIX         | 136.706       | N18       | ICUGIX         | 136.466       | S1        | TICDAM         | 136.289       | O5        |
| MOJKAY         | 136.698       | O69       | JIVDUR         | 136.464       | O7        | XEGFOE         | 136.274       | N3        |
| PAHQAU         | 136.695       | O4        | DUDLOF         | 136.459       | O12       | FAVPOK         | 136.263       | N11       |
| SUPLAR         | 136.695       | O6        | DIPCUD         | 136.453       | O9        | MUVVUW         | 136.262       | O6        |
| GIKQEA         | 136.691       | O7        | DAWQIE         | 136.447       | O4        | COKCEN         | 136.254       | O22       |
| FIDFUU         | 136.687       | Cl2       | HAHCIF         | 136.445       | O2        | WOLKUF         | 136.253       | O4        |
| ZZZDVY02       | 136.678       | O11       | UDIRUW         | 136.43        | N2B       | AXOCEW         | 136.25        | O3A       |
| EWESAD         | 136.666       | O12       | NISBIC         | 136.424       | O1A       | HUBMID         | 136.249       | O5A       |
| JOHLUQ         | 136.663       | O3        | GIWHAW         | 136.421       | Cl1       | RAXNAH         | 136.246       | O18       |
| XAGQAZ         | 136.653       | O6        | DOVHEB         | 136.418       | O10       | DIPCAJ         | 136.238       | O13       |
| IKOYUE         | 136.643       | N7        | RIRWIB         | 136.417       | O6        | SARCIA         | 136.231       | O10       |
| ZUJZUB         | 136.639       | O5        | PUBBUN         | 136.411       | N5        | RIBWAD         | 136.229       | Cl7       |
| SEYLEQ         | 136.635       | O26       | KAYPUW         | 136.411       | O4        | TAPRIO         | 136.227       | O7        |
| YEGGOJ         | 136.63        | S3        | MURQIA         | 136.404       | O1        | ZATSUL         | 136.226       | N4        |
| FAQYUU         | 136.629       | N8        | PUMGOV         | 136.399       | O12       | DOKKEU         | 136.225       | Cl1       |
| UGOQIS         | 136.629       | O10       | BIZFUL         | 136.397       | O1        | LECWEX         | 136.225       | F5        |
| IGUGUO         | 136.62        | S3        | GETPEE         | 136.394       | N1        | ADEKEB         | 136.224       | O4        |
| XOZKAY         | 136.617       | O10       | AZIRUW         | 136.392       | O4        | DOTHEB         | 136.221       | O5        |
| FOCFOV         | 136.612       | N2        | RAJHIU         | 136.386       | O12       | OFOPOP         | 136.22        | O24       |
| LUGREK         | 136.6         | N2        | YUXWEV         | 136.384       | O2A       | KEYPAG         | 136.216       | O2        |
| JEMYAE         | 136.6         | O7        | POGMIK         | 136.381       | O9P       | NAKPUM         | 136.215       | O6        |
| BOVLAA         | 136.598       | O6        | EQERUP         | 136.375       | O4A       | IJUVAN         | 136.21        | N6        |
| QEDTUR         | 136.592       | O7A       | WARCOJ         | 136.375       | O2        | DUCKAQ         | 136.205       | O9A       |
| RUWMON         | 136.59        | O18       | JEMXUX         | 136.364       | O1        | EBUBOV         | 136.2         | O6        |
| LIQDOH         | 136.589       | O37       | VIRJEN         | 136.362       | F3        | FEBFAU         | 136.199       | Cl2       |
| RAFWUS         | 136.589       | O2        | QUWHOG         | 136.36        | O2        | EZEGIC         | 136.196       | N2        |
| NABROY01       | 136.584       | O2        | CESQUP         | 136.358       | O4D       | DIPCOX         | 136.192       | O14       |
| REHGAN         | 136.579       | O1        | SOMKUC         | 136.358       | O7B       | ZINDAD         | 136.192       | O19       |
| FAXPOM         | 136.576       | O3        | REHGAN01       | 136.355       | O7        | DILBIK         | 136.188       | O2        |
| FAXQUT         | 136.552       | O8        | JOBYEG         | 136.352       | N2        | GUQTOB         | 136.183       | O7        |
| HOPTUC         | 136.549       | O7        | AGOKAK         | 136.35        | N2        | UKIMEI         | 136.18        | O2        |
| GAFMIK         | 136.548       | S3        | XEHYAM         | 136.348       | O8        | XIXPIE         | 136.18        | O12       |
| WOGSIW         | 136.546       | F1A       | COCQAP         | 136.347       | O8        | HOZRUM         | 136.178       | O3        |
| LUZDOB         | 136.543       | O24       | NEJGER         | 136.347       | O16       | ETIXAI         | 136.167       | O5        |
| TEDLUK         | 136.54        | O5F       | KIYFAC         | 136.344       | O4A       | JIVNAH01       | 136.164       | N4        |
| VUPQON         | 136.526       | O2        | GANGOS         | 136.338       | O2        | TUGCIJ         | 136.162       | N3        |
| OJUHOQ         | 136.524       | N3        | UGUQUJ         | 136.333       | O16       | JICNIS         | 136.156       | O2        |
| OMIDAQ         | 136.524       | O4        | VIFFUM         | 136.331       | O5        | OYAPOV         | 136.153       | O1        |
| VAXVUL         | 136.503       | Cl1       | YUQQEI         | 136.331       | O4C       | PUNQIZ         | 136.153       | O32       |
| DUFMAU         | 136.497       | O10       | WASQIR         | 136.329       | N2        | JIVNAH         | 136.146       | N4        |
| PIKYEQ         | 136.497       | O9A       | NAWTEO         | 136.329       | O25       | MIKYUE         | 136.142       | O4        |
| XEJKAB         | 136.141       | N1        | XOLCEH         | 135.976       | O22       | YEQRIZ         | 135.781       | O2C       |

|                |               |           |                |               |           |                |               |           |
|----------------|---------------|-----------|----------------|---------------|-----------|----------------|---------------|-----------|
| GETPEE         | 136.137       | O1        | DAGYAM         | 135.969       | O6        | RAXJIL         | 135.779       | O4        |
| TIHNON         | 136.137       | O6        | BINBAE         | 135.967       | O6        | CODVAV         | 135.777       | O11       |
| <b>Refcode</b> | <b>∠YZnLB</b> | <b>LB</b> | <b>Refcode</b> | <b>∠YZnLB</b> | <b>LB</b> | <b>Refcode</b> | <b>∠YZnLB</b> | <b>LB</b> |
| YOQYUZ         | 136.132       | O6        | PESYIV         | 135.967       | O9        | SEGKIT         | 135.768       | O2        |
| NODCOZ         | 136.131       | N3        | TAYBII         | 135.966       | O1        | ROPGIO         | 135.768       | F15       |
| SISFOR         | 136.131       | O10       | YUPGUN         | 135.963       | C13       | OCADAY         | 135.756       | O2        |
| MUZVOS         | 136.123       | O29       | QUXVUB         | 135.955       | O19       | VIXVIJ         | 135.752       | O8        |
| REHGAN         | 136.116       | O5        | ZOCFAB         | 135.955       | O6        | FUPQOW         | 135.742       | C11       |
| XIDNOP         | 136.113       | O7        | NICCN          | 135.952       | O3        | CEPBOR         | 135.739       | O3A       |
| SULKEQ         | 136.112       | O5        | BIXXAI         | 135.949       | N11       | DOQJUQ         | 135.739       | O10       |
| XIYFAM         | 136.11        | O2        | IZAZAL         | 135.948       | O7        | EWEDOA         | 135.739       | O3        |
| RILWOA         | 136.107       | O1        | QIDQUT         | 135.944       | O12       | IKEYAA         | 135.729       | O11       |
| XIYFAM01       | 136.107       | O5        | XAXNUF         | 135.939       | N2        | ZAQXEX         | 135.726       | O3        |
| BINBAE         | 136.1         | O1        | LISXEU         | 135.928       | O9        | FIPRUR         | 135.722       | O2        |
| WIHMIK         | 136.093       | O11       | RATCEW         | 135.924       | N4        | FUWXOL         | 135.721       | N6B       |
| PUDBAT         | 136.089       | N21       | LULWUM         | 135.923       | O5        | PUXJAV         | 135.721       | C13       |
| DUNXUH15       | 136.084       | O5A       | XIXPIE         | 135.911       | O12       | COCQET         | 135.721       | O8        |
| ZZZDVY03       | 136.082       | O9        | LIDWAA         | 135.905       | O33       | GUNGUU         | 135.719       | O2        |
| GAKHAD         | 136.07        | N1        | GOTLIM         | 135.899       | O12       | GICTAQ         | 135.712       | O4        |
| GETZAH         | 136.07        | O5        | YUZQIV         | 135.898       | N1        | QETFIF         | 135.705       | O1        |
| LAXDOG         | 136.067       | O3        | DIJMUG         | 135.898       | S1        | AJAPFH         | 135.703       | N3        |
| QIBNOE02       | 136.062       | O10       | ESAVEB         | 135.897       | O5        | SITCIH         | 135.702       | O3        |
| MAHTAS         | 136.061       | O11       | ZEJSUF         | 135.878       | O5        | GICFIK         | 135.7         | O4        |
| PEWFUT         | 136.06        | O7        | SUNYAC         | 135.877       | C15       | ZIHWIZ         | 135.698       | F25       |
| EFIXUO         | 136.055       | O9        | GIQGAS         | 135.877       | O5A       | QISFIL         | 135.686       | O17B      |
| LOZQEY         | 136.054       | O9        | DICDIG         | 135.876       | N1        | WIYCAL         | 135.685       | O3        |
| PIBCEL         | 136.053       | O4A       | UPOZEG         | 135.876       | N2        | ASIZAG         | 135.673       | O5        |
| TIHNON         | 136.053       | O9        | QALHET         | 135.875       | O16       | YAXNIX         | 135.673       | O3        |
| FONPUV         | 136.049       | O9        | UZIDAJ         | 135.875       | O5        | RUPCIQ         | 135.671       | F71       |
| PUDCEY         | 136.046       | N14       | XIFWAM         | 135.875       | O3        | ROZDAN         | 135.67        | S1        |
| PIKHIA         | 136.044       | N7        | GICTEU         | 135.874       | O4        | RAMSAC         | 135.669       | O5        |
| QIBNOE01       | 136.043       | O7A       | MEWWET         | 135.874       | O6        | XUGBOR         | 135.664       | N3        |
| ULAKOI         | 136.04        | N2        | VUQXUD         | 135.873       | O12       | XAVKEN         | 135.664       | O6        |
| VONMIU         | 136.039       | O3        | SOLYEA         | 135.861       | N6        | VIBJEW         | 135.662       | O6        |
| QUKRAS         | 136.037       | O1        | GUFQEE         | 135.861       | O8        | LIRDAS         | 135.645       | S3        |
| FEBFIC         | 136.023       | O3        | XIXPEA         | 135.858       | O11       | MIHNOH         | 135.641       | O6        |
| OPOLUC         | 136.022       | O2        | AGOHIP         | 135.851       | O5        | HECHAC         | 135.634       | N5        |
| FIKNIX         | 136.02        | O13       | TOJBIF         | 135.848       | O9B       | DUDQUR         | 135.632       | O6        |
| KILYAJ         | 136.017       | O27       | KILXUC         | 135.837       | O14       | KEPGOF         | 135.626       | O10       |
| KERGOE         | 136.01        | O5        | NEQDIW         | 135.827       | O4        | PIPKEG         | 135.619       | O21       |
| KEFNOZ         | 136.009       | F3        | YIZCUH         | 135.809       | O4        | JAJPIU         | 135.617       | O9        |
| RANTEF         | 136.001       | N3        | SOXTUW         | 135.805       | O19       | DAWQIE         | 135.61        | O2D       |
| ONIWAK         | 135.999       | O10A      | WEMWAP         | 135.805       | O2V       | XANVIR         | 135.61        | O13       |
| BUYBAZ         | 135.997       | O6        | SACXIH         | 135.804       | N4        | KIHZOS         | 135.6         | C12       |
| PIPKIK         | 135.997       | O21       | LEKNUN         | 135.802       | O4D       | XUYYAS         | 135.599       | O7B       |
| TAPREK         | 135.996       | O7        | VIRLAK         | 135.802       | O14       | PIHNIE         | 135.593       | O7        |
| QIBNOE         | 135.994       | O10       | GAKHAD01       | 135.795       | N1        | CAPWAU         | 135.592       | O10       |
| AFUWEG         | 135.99        | O2        | POCQUU         | 135.794       | O7        | SECXUU         | 135.59        | O2        |
| WAPQUC         | 135.988       | N4        | RICKIA         | 135.789       | O7A       | KEYLEG         | 135.587       | O11       |
| GUNGUU         | 135.583       | O10       | MAQKOH         | 135.359       | N11       | BASZUU         | 135.163       | O41       |
| OHUTOC         | 135.577       | N1        | HIQVUZ         | 135.353       | O5        | XIFYET         | 135.151       | O8        |
| TEFPIG         | 135.576       | O24       | MOHLEB         | 135.343       | O3D       | YOCKUW         | 135.149       | O2        |
| DAZCOX         | 135.572       | O9        | SOPWIF         | 135.339       | O5        | SEPMOS         | 135.144       | O5A       |
| JAHZOI         | 135.572       | O5        | XIXCUD         | 135.332       | C18       | IMIHHU         | 135.144       | S5        |
| ERIRAZ         | 135.568       | O3        | DOMYUC02       | 135.329       | O1C       | IZIPAI         | 135.142       | O2        |
| OFUNOW         | 135.567       | O13A      | QIDRII         | 135.326       | O6        | TUJVUS         | 135.141       | O4        |
| GIZGAA         | 135.566       | O10       | OTOZOO         | 135.325       | O4B       | KEPGOF         | 135.135       | O11       |
| ETIPII         | 135.564       | O10       | QIDREE         | 135.323       | O5        | FOZJAI         | 135.132       | O3        |
| IKEYAA         | 135.56        | N3        | MIKKAV         | 135.32        | O3B       | OQIJII         | 135.126       | N6        |
| LACQIS         | 135.558       | O8        | KUBVIO         | 135.318       | O5        | DEFGAY         | 135.124       | O4        |

|                |               |           |                |               |           |                |               |           |
|----------------|---------------|-----------|----------------|---------------|-----------|----------------|---------------|-----------|
| UZICUC         | 135.554       | N2        | WONXED         | 135.317       | O6        | AMOYIL         | 135.121       | N2        |
| LAWHAV         | 135.554       | O6        | WUPTEI         | 135.315       | O3        | HUMCUN         | 135.114       | S2        |
| <b>Refcode</b> | <b>∠YZnLB</b> | <b>LB</b> | <b>Refcode</b> | <b>∠YZnLB</b> | <b>LB</b> | <b>Refcode</b> | <b>∠YZnLB</b> | <b>LB</b> |
| CAPWAU         | 135.55        | O3        | WIMDOP         | 135.314       | N4        | NEPLIE         | 135.109       | O3        |
| VOQDEL01       | 135.546       | O3        | KAMLER         | 135.312       | O21       | NOMQAJ01       | 135.101       | N1        |
| CAPWAU         | 135.544       | O6        | NAMCUA         | 135.31        | O2        | NAZZOG01       | 135.075       | O7        |
| EBIKAB         | 135.543       | O7        | VIVDUB         | 135.305       | O1A       | HETWAF         | 135.071       | O6        |
| ZZZDVY04       | 135.54        | O9        | PUXNEB01       | 135.302       | O4        | MOHRAD         | 135.065       | O1        |
| EGUQOO         | 135.536       | O10       | GAKTIW01       | 135.288       | O7        | PIYFEM         | 135.064       | N5        |
| NAKPUM         | 135.533       | O8        | UMAWOV         | 135.287       | O12       | HIBHEJ         | 135.063       | O6        |
| TAMZEQ         | 135.53        | O14       | BOFGEL         | 135.285       | O3        | ESOUYUG        | 135.057       | O7        |
| PUDBIB         | 135.52        | N5        | SOKROC         | 135.284       | O5        | CAPWAU         | 135.048       | O8        |
| FOYMUE         | 135.514       | O41       | YOVCAP         | 135.277       | O9        | PIDMEV         | 135.048       | O4C       |
| LEZVIW         | 135.499       | O24       | HOTFED         | 135.271       | O7        | TOMKEN         | 135.04        | O10       |
| GAKTIW         | 135.494       | O7        | BULSUX         | 135.267       | Cl4A      | FOCLUH         | 135.038       | O4V       |
| DOMYUC01       | 135.493       | O1        | ATOWUE         | 135.265       | O12       | OGIBEM         | 135.027       | O14       |
| MULKUZ         | 135.487       | O6        | DAGYAM         | 135.259       | O6        | YEMDIG         | 135.023       | O2        |
| ARIFIQ         | 135.479       | O8A       | IKOYUE         | 135.253       | N2        | MEXRIT         | 135.015       | O14       |
| MUDKOM         | 135.478       | N6C       | SENJEB         | 135.253       | O4C       | BUYBED         | 135.004       | O2        |
| DAGXOZ         | 135.471       | O7        | DUNXUH         | 135.251       | O5A       | RAMRUV         | 135.004       | O6        |
| PUWKUP         | 135.471       | O8        | JIWPAJ         | 135.248       | O10       | EVEJEW         | 135.001       | O7        |
| BTCBZN         | 135.466       | N2        | LACGAA01       | 135.247       | O3        | HATTEE         | 135           | Cl6       |
| WIHMIK         | 135.466       | O12       | PIKYOY         | 135.247       | O8        | DEFGEC         | 134.999       | O7        |
| RIBWEH         | 135.465       | Cl2       | PUXNEB         | 135.247       | O4        | PUDBAT         | 134.998       | N13       |
| VUQXUD         | 135.437       | O11       | YILXAT         | 135.237       | O6        | EREQUP         | 134.997       | O11       |
| IHIVAZ         | 135.432       | O4        | EVUSAQ         | 135.233       | O8A       | QAKFOA         | 134.997       | O9        |
| YODYUO         | 135.429       | O12       | VAJMAV         | 135.223       | O12       | FOCNET         | 134.983       | N2        |
| FISCEQ         | 135.419       | N7        | TUKFAI         | 135.222       | O23       | DUNXUH06       | 134.983       | O3C       |
| PEGBEL         | 135.414       | O2A       | ABOLAG         | 135.214       | O5        | HIHBUX         | 134.976       | O4        |
| IGUDUK         | 135.402       | O4        | QUGWOF         | 135.213       | O8        | XUXQEN         | 134.975       | F9        |
| EYEDIY         | 135.396       | O6        | VOJMEP         | 135.206       | O6        | DAXGOA         | 134.972       | O9        |
| CESQUP         | 135.384       | N2        | LISZEU         | 135.205       | O10       | VIGFAW         | 134.972       | O1A       |
| FIHYOM         | 135.383       | O7        | UVUWAL         | 135.202       | O9        | VIIQAX         | 134.971       | O1        |
| CAHJII         | 135.375       | O7        | WIRHUD         | 135.195       | O14       | GAPDAE         | 134.965       | O11       |
| REXKIO         | 135.374       | N6        | KALJEN         | 135.187       | O10       | SAEDZN11       | 134.965       | O1        |
| NABMAF         | 135.368       | O6        | PETFON         | 135.183       | O2        | NAZZOG         | 134.956       | O3        |
| FASWED         | 135.366       | O20       | FIKNIX         | 135.175       | O6        | RUNSOI         | 134.954       | O5        |
| LEYRAJ         | 135.363       | N15       | RECKIX         | 135.172       | O3        | LIDWAA         | 134.952       | O35       |
| PUWKUP         | 135.36        | N2        | OBUGIB         | 135.165       | S2        | AMETOB         | 134.946       | O6        |
| EQUUNUA        | 134.944       | O7        | DIWREJ         | 134.711       | N5        | VARZEV         | 134.543       | O8        |
| ODUPOT         | 134.94        | F8        | GAPDAE         | 134.711       | O4        | TEGQEF         | 134.534       | O26       |
| OFIQUUS        | 134.935       | F9        | COFCIL         | 134.707       | O4        | SEZMIW         | 134.531       | O2        |
| ETIPII         | 134.933       | O9        | YUPKAW         | 134.705       | O1        | SUPGAO         | 134.519       | O4        |
| AFEJAX         | 134.927       | O1        | LIQDOH         | 134.697       | O42       | XUYHAA         | 134.515       | N6        |
| XUGDEK         | 134.924       | O2        | OXIXEA         | 134.697       | O2        | RAVGAY         | 134.511       | O3B       |
| JABKAY         | 134.914       | O4        | RUZQIM         | 134.697       | O8        | NEPLIE         | 134.51        | O2        |
| XEDLUP         | 134.906       | Cl12      | CAPWAU         | 134.686       | O2        | XEGTEM         | 134.479       | O6        |
| SAMHAP         | 134.901       | Cl3       | AGAWUA         | 134.684       | O1        | DEPYIH         | 134.476       | N18       |
| MAKSOI         | 134.896       | O6A       | PUNQIZ         | 134.67        | O23       | ROCWAH         | 134.473       | O7        |
| MONDUQ         | 134.895       | O2        | ZUGVEC         | 134.667       | O5        | TEDFOY         | 134.473       | O4        |
| NAZZOG         | 134.895       | O7        | KAKFEL         | 134.659       | O4        | YUPKAW         | 134.473       | O4        |
| IFIZOM         | 134.892       | O2        | YEXJOB         | 134.656       | O3        | CAXPUM04       | 134.471       | N8        |
| CILDORO1       | 134.89        | O6        | MIDQAU         | 134.654       | F2A       | XIYGAN         | 134.47        | O4        |
| UGUZEC         | 134.881       | O9        | LIDWAA         | 134.653       | O23       | YOCKUW         | 134.47        | O3        |
| UTATOZ         | 134.879       | O3        | LIWXEV         | 134.649       | O3        | NIQSUD         | 134.439       | O8        |
| JIWNUB         | 134.87        | O10       | KAZBEU         | 134.642       | N3        | POWDOV         | 134.431       | O6        |
| GENZAD         | 134.863       | O20       | TAYBII         | 134.629       | O3        | OHIYAH         | 134.43        | N1A       |
| VEGSEJ         | 134.861       | O15       | TUKFIQ         | 134.628       | O23       | TUJWED         | 134.43        | O1        |
| LOQFEE         | 134.858       | O6        | ENEYEE         | 134.626       | O5        | YEQSOF         | 134.429       | O2        |
| EQOVIP         | 134.855       | N2        | GIDCUT         | 134.626       | O18       | ZILTIA         | 134.423       | N4        |

|                |               |           |                |               |           |                |               |           |
|----------------|---------------|-----------|----------------|---------------|-----------|----------------|---------------|-----------|
| DORFUN         | 134.854       | O4A       | PIPKAC         | 134.621       | O22       | YODDAZ         | 134.418       | N3        |
| PIPKEG         | 134.847       | O22       | QARBOC         | 134.619       | N2D       | PUPMOD         | 134.415       | O7        |
| <b>Refcode</b> | <b>∠YZnLB</b> | <b>LB</b> | <b>Refcode</b> | <b>∠YZnLB</b> | <b>LB</b> | <b>Refcode</b> | <b>∠YZnLB</b> | <b>LB</b> |
| ONIWAK         | 134.84        | S1A       | RICKIA         | 134.619       | O1        | EMOQIH         | 134.413       | O7        |
| CILDOR         | 134.835       | O6        | MAYNIM         | 134.616       | F3        | YUBJEN         | 134.408       | O22       |
| NOXBK          | 134.835       | O15       | QASZAO         | 134.615       | F3        | LABQIQ         | 134.406       | O3A       |
| UZOCUK         | 134.833       | O1A       | HONJOM         | 134.614       | C12       | QOMFEF         | 134.406       | O45       |
| YAPNEM         | 134.829       | O4        | KEYQAJ         | 134.607       | O20       | JOFDUG         | 134.404       | O3E       |
| NOMQAJ01       | 134.827       | N1        | IDOHES         | 134.598       | O7        | IGAVAN01       | 134.401       | O7        |
| QUBLAB         | 134.824       | O4        | TUKDUA         | 134.598       | O23       | PERBOF         | 134.401       | O2        |
| KATHUM         | 134.821       | N2        | BOFGEL         | 134.596       | O5        | NOHDOG         | 134.398       | O7        |
| DEFGIG         | 134.819       | O3        | ZACKAP         | 134.593       | O10       | DACBOB         | 134.391       | O1B       |
| NALNIZ         | 134.817       | N2        | RAXSIU         | 134.591       | O6        | IWOQEQ         | 134.379       | O2        |
| VIQMEO         | 134.816       | O1        | VAXVOJ         | 134.588       | O19       | TAYBII         | 134.379       | O6        |
| NAQLAT         | 134.804       | O14       | HODZIJ01       | 134.586       | N4        | XEHTUA         | 134.378       | O6A       |
| NEKWAB         | 134.797       | O3        | RIDWUX         | 134.586       | O22       | MUZHAR         | 134.377       | O8        |
| RUWMED         | 134.788       | O89       | YIJDAY         | 134.586       | O6        | KALJEN         | 134.37        | O4        |
| XEDFAN         | 134.772       | N1        | FIDFUU         | 134.583       | O12       | ABOWOF         | 134.367       | O6        |
| WABFEL         | 134.761       | C11       | OGUQAL         | 134.581       | N3        | KOQXAR         | 134.367       | O4        |
| GUPWOE         | 134.761       | S5        | TAVSUH         | 134.581       | O6        | MUZVUY         | 134.359       | C12       |
| REFLEV         | 134.757       | O3        | EYERAB         | 134.578       | O44       | GICLUB         | 134.353       | O22A      |
| PEGBEL         | 134.75        | O3G       | WECHOD         | 134.577       | O10       | XAVKEN         | 134.339       | O8        |
| AGOTAS         | 134.746       | O6        | XOLQIY         | 134.574       | O4        | WUVZIZ         | 134.336       | O4        |
| UREPAL         | 134.744       | O5        | CUBWIG         | 134.571       | O4        | DEZXIS         | 134.329       | O22       |
| LICXAZ         | 134.737       | O7        | FEDYEU         | 134.563       | O13       | HEBZEV         | 134.32        | C11       |
| NAZZOG01       | 134.736       | O2        | KEYQAJ01       | 134.557       | O21       | SUPGAO01       | 134.319       | O3        |
| KOQXAR01       | 134.724       | O4        | VAJHIA         | 134.557       | O7        | GAYZIP         | 134.317       | O2        |
| WUPZOY         | 134.722       | O13       | UJAZAG         | 134.553       | O9        | SAHFEN         | 134.303       | O6        |
| CUMZAN         | 134.714       | N1        | TISBIG         | 134.551       | O7        | FAKHOQ         | 134.302       | O1        |
| HUPFAZ         | 134.299       | O2        | HUPXIA         | 134.115       | N3        | ROQKIT         | 133.927       | O3        |
| AQUHIG         | 134.295       | O10       | SOYBEO         | 134.115       | S2        | XIXNUO         | 133.925       | S1        |
| YUCBEE         | 134.29        | O6        | AJOVUS         | 134.107       | O3        | GEZXUH03       | 133.919       | O5        |
| JIWNOV         | 134.283       | O29       | QETFIF         | 134.103       | N6        | VUYBEX         | 133.911       | O4        |
| JUZQAY         | 134.283       | O2        | ASEROI         | 134.102       | O8        | HOKWAF         | 133.907       | O11       |
| QOJYEV         | 134.283       | O9        | GEZXUH02       | 134.102       | O5        | GICLUB         | 133.906       | O30       |
| YAWBAD         | 134.281       | N5        | ESOUUG01       | 134.101       | O3        | HAZYUE         | 133.897       | O4B       |
| POLDOL         | 134.272       | O1A       | HOPLOQ         | 134.096       | N2        | HUXTUP         | 133.894       | O6        |
| AZAQOJ         | 134.269       | O9        | IVUTOJ         | 134.082       | O12       | INUWOD         | 133.887       | C12       |
| NAKPUM         | 134.267       | O2        | VIKOW          | 134.076       | O2        | OYOWEH         | 133.883       | O3        |
| PAHPIB         | 134.266       | O8        | NETVUF         | 134.072       | O5        | ZZZDVY03       | 133.871       | O10       |
| LUZDOB         | 134.262       | O27       | IGAVAN01       | 134.071       | O1        | JAWDOD         | 133.869       | C11       |
| WICJAT         | 134.257       | O7L       | OFIQUS02       | 134.069       | F9        | UJAPOL         | 133.864       | O11       |
| UWUVAK         | 134.257       | F11       | DOKKEU         | 134.067       | C11       | WUPTEI         | 133.857       | O1        |
| MEXRIT         | 134.25        | O15       | CUFNID         | 134.058       | O4B       | DUNXUH14       | 133.855       | O5A       |
| YISKER         | 134.237       | C13       | EYUMES         | 134.055       | S4        | ROPGIO         | 133.853       | O2        |
| REVJUB         | 134.237       | O20       | LIZYUQ         | 134.049       | O52       | TEDVON         | 133.852       | S4        |
| FIPRUR         | 134.235       | O1        | GICTAN         | 134.043       | O11       | MPZHZN         | 133.851       | O3        |
| HIQVUZ         | 134.235       | O9        | XUNWIM         | 134.041       | O5        | GEYRIO         | 133.85        | O9        |
| QUXVUB         | 134.221       | O5        | IREYOW         | 134.022       | O11       | QARVIP         | 133.843       | O11       |
| DEFGEC         | 134.22        | O6        | HOJJOI         | 134.015       | O3        | JVDUR          | 133.839       | O14       |
| NENXUC         | 134.214       | O7        | DOZFOO         | 134.011       | N1        | UWUVEO         | 133.839       | F1        |
| LAGROC         | 134.209       | O3B       | QIRYEX         | 134.01        | N2        | MEHBIL         | 133.836       | O1        |
| COFCIL         | 134.207       | O1        | AXOCEW         | 134.01        | O6B       | PUDBUN         | 133.835       | N4        |
| JOGBAK         | 134.206       | O3        | OCOKUM         | 134.01        | S6        | FAHMIM         | 133.835       | O5C       |
| WUHLAO         | 134.205       | O3A       | CAWLIY         | 134.009       | O2        | IREYOW         | 133.833       | O26       |
| GEZXUH         | 134.201       | O5        | IBIZAV         | 134.008       | N6        | XOZJOL         | 133.833       | O14       |
| XINQAQ         | 134.199       | O3A       | AWIGEU         | 134.008       | O25       | RUPCIQ         | 133.827       | F58       |
| WIYFES         | 134.194       | O14       | NEYBID         | 134.002       | O4        | FOCNET         | 133.823       | O3A       |
| KEHNIW         | 134.191       | O14A      | GABVUD         | 133.993       | N2        | AMERIT         | 133.821       | O2        |
| JAHNUE         | 134.19        | O6        | GAYZIP01       | 133.987       | O3        | DIFWEU10       | 133.82        | C12A      |

|                |               |           |                |               |           |                |               |           |
|----------------|---------------|-----------|----------------|---------------|-----------|----------------|---------------|-----------|
| KIZGIL         | 134.19        | O20       | DUDKOE         | 133.986       | O18       | NEPPON         | 133.807       | O5        |
| QAYNAF         | 134.183       | O8        | SIQZOL         | 133.986       | O6        | FASWED         | 133.797       | O23       |
| <b>Refcode</b> | <b>∟YZnLB</b> | <b>LB</b> | <b>Refcode</b> | <b>∟YZnLB</b> | <b>LB</b> | <b>Refcode</b> | <b>∟YZnLB</b> | <b>LB</b> |
| UVIKES         | 134.18        | O1        | DEPYIH         | 133.98        | N7        | BOQPIG         | 133.796       | O2        |
| UNIQEO         | 134.171       | O2C       | XUWGAY         | 133.975       | N5        | RICNAU         | 133.792       | O1D       |
| COFCIL         | 134.17        | O13       | MOJKAY         | 133.974       | O68       | DEDNAF         | 133.787       | O15       |
| JEFBUV         | 134.159       | O4        | TEDSAX         | 133.962       | O10       | OQIJII         | 133.783       | N5        |
| QORKOX         | 134.153       | O11       | LESGIC         | 133.958       | O2        | RAGXOO         | 133.777       | O5        |
| ZUGVEC         | 134.149       | O3        | SIXJER         | 133.954       | O2        | TAPHOJ         | 133.777       | O3        |
| LEJQAV         | 134.145       | O7        | GECXUH01       | 133.952       | O5        | NAZVOB         | 133.775       | O10       |
| NAHGUA         | 134.14        | CI2       | LARGIX         | 133.951       | O6        | CAXPUM03       | 133.772       | N8        |
| RULDUX         | 134.13        | O8        | TUKDOU         | 133.95        | O23       | WEXHIS         | 133.77        | O17       |
| GESPEC         | 134.128       | O10       | DISSOR         | 133.941       | O5        | OKUXUQ         | 133.764       | O4        |
| SIRFUY         | 134.128       | O5        | XOZJOL         | 133.938       | O8        | ETANOD         | 133.761       | O1        |
| GUWXIG         | 134.127       | O9        | JIWNIP         | 133.937       | O29       | UMENOQ         | 133.753       | O4A       |
| RIDWUX         | 134.127       | O27       | OYEXOI         | 133.934       | O23       | DEBSUZ         | 133.727       | O13       |
| CIBYAO         | 134.126       | O3E       | GUPBOK         | 133.933       | O8        | UDOQAH         | 133.715       | O7        |
| IGAVAN         | 134.125       | O8        | GABWEN         | 133.93        | O5        | LAYXAM         | 133.705       | O3        |
| EMOQIH         | 134.124       | N3        | SENJEB         | 133.93        | O3C       | ASIZAG         | 133.698       | O10       |
| ICUPUV         | 133.69        | O7        | XUQH0H         | 133.503       | O10       | ECOZUT         | 133.263       | O15       |
| KICVAU         | 133.681       | O6        | PUPXEE         | 133.502       | O3        | FEBYIW         | 133.262       | O27       |
| YAFTOO         | 133.679       | O2        | OCOLAT         | 133.496       | N4        | NEPPUT         | 133.262       | O7        |
| VEXTUP         | 133.666       | O24       | CEWCAJ         | 133.493       | O5        | JIVDUR         | 133.258       | O7        |
| BINBAE         | 133.66        | O10       | ZUGVEC         | 133.493       | O5        | ACACZM         | 133.252       | O2        |
| AYIFUL         | 133.654       | O1        | UPOZEG         | 133.492       | N4        | YOSZUC         | 133.243       | O5        |
| NAZZOE         | 133.652       | O3        | QUQTED         | 133.484       | S2        | ZOJLAN         | 133.241       | Te2       |
| ROPGIO         | 133.648       | O4        | GAVPAY         | 133.482       | N3        | GUFPUU         | 133.239       | N2        |
| FEQVEE         | 133.647       | O2A       | ZEBJUL         | 133.482       | O2        | FIPRUR         | 133.239       | O2        |
| OYOWIL         | 133.643       | N18       | GECVAO         | 133.468       | F7        | GACWUG         | 133.237       | O6        |
| HETDIT         | 133.629       | O3        | AYISEH01       | 133.464       | O3        | IDOHES         | 133.236       | O6        |
| FAHJAB         | 133.625       | O4F       | AWIGUK         | 133.449       | O25       | DOMJOH         | 133.235       | CI2       |
| AHOFUZ         | 133.621       | O10       | GASRIE         | 133.447       | O1        | XASDAZ         | 133.229       | O12       |
| WERLOV         | 133.613       | O5        | IHIVAZ         | 133.447       | O4        | QOXROL         | 133.226       | N5        |
| WENDEA         | 133.612       | N6        | RORSEY         | 133.445       | N3        | GOSNAG         | 133.226       | O3A       |
| EQUYOU         | 133.61        | O10       | JIWPAJ         | 133.443       | O29       | SIXJIV         | 133.226       | O2        |
| LUFVAM         | 133.61        | O1        | RAWPIP         | 133.441       | N3        | OYEXIC         | 133.225       | O24       |
| WEYLUK         | 133.606       | O3A       | AMETOB         | 133.414       | O5        | KAPWUV         | 133.224       | O18       |
| TAQXAN         | 133.604       | N1A       | GOSNAG         | 133.414       | O9        | DONPAY         | 133.217       | O5        |
| MEYPIT         | 133.603       | O9        | HYZCZN         | 133.414       | O4A       | AWIGIY         | 133.21        | O26       |
| NEWZEX         | 133.6         | O8        | TAYQIU         | 133.414       | O1        | VEGSAF         | 133.206       | O4        |
| OGOQOR         | 133.595       | O5        | DEJLIO         | 133.411       | O18       | YAKYOB         | 133.206       | S4        |
| IWUSAV         | 133.594       | O7        | UTEKAG         | 133.402       | O9        | GEYRIO         | 133.205       | O9        |
| HONJOM         | 133.59        | CI4       | HICLOV         | 133.401       | O21       | KAPWUV         | 133.205       | O64       |
| LABPIN         | 133.59        | CI2       | NOVQOH         | 133.4         | O13       | PEMPAZ         | 133.205       | O3B       |
| IFIBEH         | 133.589       | N10       | HIYNIN         | 133.398       | O9        | EVUSAQ         | 133.2         | N1        |
| OVIQER         | 133.58        | O4        | XOMHOW         | 133.386       | CI2       | ADIGUQ         | 133.194       | N3        |
| LAZBEU         | 133.578       | O6A       | BEGZOE         | 133.38        | O6        | BEPLUF         | 133.186       | O1A       |
| HIQVUZ         | 133.572       | O8        | LEJDUD         | 133.375       | O4E       | SAMHAP         | 133.185       | CI3       |
| BODBIF         | 133.566       | O7        | QENZAK         | 133.364       | O7        | ZAXKOA         | 133.179       | O5        |
| LUZDOB         | 133.566       | O33       | XIXPEA         | 133.363       | O11       | YILBIG         | 133.178       | O3E       |
| NASJOI         | 133.563       | O7        | IGAVAN         | 133.355       | O4        | UCUJIO         | 133.169       | O12       |
| KAPWUV         | 133.557       | O45       | YEGZAP         | 133.352       | S1        | VIZNUQ         | 133.169       | O26       |
| JISJUT         | 133.555       | O5A       | ETUXUM         | 133.351       | O1        | HEHMOY         | 133.164       | S7        |
| EPEYII         | 133.552       | O13       | OFUNOW         | 133.35        | O14       | WOGSIW         | 133.164       | F1        |
| PIWNIU         | 133.55        | O5        | PIYFEM         | 133.342       | N6        | JOFDUG         | 133.161       | O5        |
| TISPIV         | 133.547       | O4        | CIBYAO         | 133.342       | O4G       | DATFUZ         | 133.16        | N3        |
| QUQTED01       | 133.547       | S2        | FERUYU         | 133.34        | O4        | UJAZAG         | 133.159       | O6        |
| TIHNON         | 133.539       | O8        | OFUNOW         | 133.337       | O8        | PUNQIZ         | 133.157       | O10       |
| IFIBEH         | 133.537       | N4        | TATCUO         | 133.329       | O3        | MIVDEB         | 133.156       | O5        |
| JUKHAA         | 133.537       | O5        | DEZXIS         | 133.327       | O30       | BUYBED         | 133.153       | O4        |

|                |               |           |                |               |           |                |               |           |
|----------------|---------------|-----------|----------------|---------------|-----------|----------------|---------------|-----------|
| KEBGIK         | 133.537       | O8        | WOJJEK         | 133.299       | O3        | ESoyUG         | 133.15        | O3        |
| JAKPAN         | 133.532       | O4B       | DEBSUZ         | 133.297       | O6        | FOCLUH         | 133.149       | O3EA      |
| <b>Refcode</b> | <b>∠YZnLB</b> | <b>LB</b> | <b>Refcode</b> | <b>∠YZnLB</b> | <b>LB</b> | <b>Refcode</b> | <b>∠YZnLB</b> | <b>LB</b> |
| NUMTAS         | 133.532       | O2        | GICMAI         | 133.281       | O29       | LOQLAF         | 133.14        | O4        |
| QARVIP         | 133.514       | O11       | AGIWAQ         | 133.276       | O3B       | AYISEH         | 133.134       | O4        |
| EQUONIO        | 133.512       | O10       | WALBOC         | 133.274       | N6A       | JAHNOY         | 133.132       | O2        |
| MAPMOJ         | 133.511       | O1A       | WALBOC01       | 133.274       | N3A       | BIBGOJ         | 133.131       | O3        |
| COFCIL         | 133.504       | O10       | ICOLUK         | 133.273       | O5        | XEJFIC         | 133.122       | O3B       |
| CELGIL         | 133.503       | O2B       | UNOKIS         | 133.266       | O1        | QAHXUU         | 133.116       | O5        |
| BEMPIU         | 133.115       | O8        | TOJPOX         | 132.938       | N6        | YITKEV         | 132.738       | O12       |
| ODIRID         | 133.11        | O2        | WALBOC         | 132.936       | O6        | MOJKAY         | 132.737       | O72       |
| WEYMOE         | 133.108       | O3        | XELTOZ         | 132.933       | O1        | MIGXOS         | 132.736       | O2D       |
| KAMLER         | 133.107       | O20       | IFAWAN         | 132.928       | N10       | GAYZOV         | 132.734       | O6        |
| KAHCIH         | 133.104       | Cl1       | CUBWIG         | 132.928       | O19       | MADYID         | 132.733       | I4        |
| FEQVEE         | 133.101       | O1A       | XOHNEO         | 132.928       | O6        | XAWNAK         | 132.731       | O3        |
| YEYFIT         | 133.098       | O7        | VARZEV         | 132.924       | O5        | LEJQAV         | 132.73        | O5        |
| LEJQAV         | 133.096       | O3        | JAHNUE         | 132.921       | O4        | NUJVAS         | 132.724       | O3        |
| IWUROI         | 133.094       | O13       | FEGWOH         | 132.921       | F4        | ACACZM02       | 132.721       | O3        |
| POKQAK         | 133.093       | O8        | QORKIR         | 132.916       | O17       | BUBJAM         | 132.711       | N8        |
| UMOLAJ         | 133.092       | O4        | JAVMEY         | 132.914       | N6        | LAYTAJ         | 132.708       | O1        |
| TUBBAV         | 133.088       | O2        | QEVSOC         | 132.901       | O11       | LEJQAV         | 132.697       | O6        |
| ESAVEB         | 133.084       | O10       | LEJQAV         | 132.893       | O2        | HOWQOA         | 132.69        | O20       |
| EDONOE         | 133.079       | O7        | MEPXUB         | 132.887       | N6        | NACZIE         | 132.688       | O1        |
| LEHMUK         | 133.079       | O11       | OTIVUJ         | 132.886       | O9        | WARCOJ         | 132.682       | O5        |
| RAFZIJ         | 133.079       | O9        | EBEZOE         | 132.883       | O6        | HEFRES         | 132.669       | O8        |
| KAPWUV         | 133.072       | O50       | JISJUT         | 132.88        | N2A       | SEZMIW         | 132.652       | O2        |
| DUFKAT         | 133.068       | O9        | OYOWIL         | 132.873       | O6        | DAXXOR         | 132.649       | O2        |
| OGOWEN         | 133.066       | O4A       | EBEZEU         | 132.871       | O5        | OFUGAY         | 132.646       | O48       |
| DUNXUH12       | 133.063       | O5A       | XEQNOX         | 132.868       | O12       | TABSIA         | 132.644       | O2        |
| SOPNOB         | 133.056       | O1        | KIBZAX         | 132.866       | O7        | BOFVAU         | 132.63        | O7        |
| KEYLEG         | 133.043       | O6        | GIQZEP         | 132.861       | O3        | EQERUP         | 132.629       | O2B       |
| WECHOD         | 133.041       | O9        | COLBUB         | 132.86        | N8        | KIRQIP         | 132.628       | O9        |
| MIPYIU         | 133.034       | O10       | BUBHUE         | 132.857       | N8        | EBEZEU         | 132.624       | O15       |
| XUYGED         | 133.034       | O2        | FAVPEA         | 132.852       | O1        | IZAVEK         | 132.623       | O6        |
| WECHUJ         | 133.031       | O4C       | ZEFFEV         | 132.845       | N2A       | SORBOQ         | 132.622       | O7        |
| FOWQEQ         | 133.023       | O10       | XAGBOZ         | 132.844       | N12       | HETWAF         | 132.614       | O5        |
| SETROB         | 133.021       | O6        | NUCCEW         | 132.825       | O15       | OSAXIQ         | 132.611       | O7A       |
| IQUMIQ         | 133.015       | O9        | SADFAH         | 132.825       | O1        | FEDYEU         | 132.59        | O9        |
| RESSUH         | 133.013       | O16       | QURBOX         | 132.818       | O4        | URORAX         | 132.585       | O8        |
| OMEWOU         | 133.009       | O5        | XEQNOX         | 132.817       | O9        | NARKEA         | 132.578       | O7        |
| LMETZN01       | 133.008       | N2        | XOZKAY         | 132.816       | O14       | TIRTAQ         | 132.577       | O8B       |
| LIMGOF         | 133.006       | N7        | NANZIM         | 132.815       | O10       | KEQJEX         | 132.572       | O2        |
| XAVKEN         | 133.006       | O5        | LOKL0M         | 132.811       | O4        | MIXWUO         | 132.563       | O19       |
| OGUBAV         | 133.005       | O4        | CAXPUM05       | 132.81        | N2        | EBEZOE         | 132.561       | N4        |
| LUZDOB         | 133.002       | O35       | TIQBEB         | 132.807       | O13       | VIBJEW         | 132.56        | O20       |
| SOLYEA         | 132.997       | N3        | CAXPUM02       | 132.806       | N2        | IY0BUV         | 132.551       | O7        |
| QUJCUV         | 132.997       | O12       | QARVEL01       | 132.801       | S1        | HEJMOC         | 132.544       | O14       |
| YEYFIT         | 132.992       | O16       | QARVIP         | 132.797       | O7        | IXOQIY         | 132.539       | N12       |
| NUWWIM         | 132.986       | N3        | SESFAY         | 132.795       | O4        | QEPRUC         | 132.539       | O6        |
| NOBYIO         | 132.982       | O8A       | CIMDAF         | 132.783       | O9        | IZAVEK01       | 132.535       | O6        |
| CIWBUH         | 132.97        | O1        | LAPTIJ         | 132.775       | N5        | RAXSIU         | 132.532       | N3        |
| HAGMAG         | 132.97        | O2        | OFIQU01        | 132.773       | F9        | QOYSEF         | 132.526       | O6        |
| LERNAZ         | 132.962       | O4        | PIPKIK         | 132.765       | O22       | CEXTEI         | 132.511       | S2        |
| RAMGES         | 132.954       | O2        | HAGHII         | 132.764       | O6B       | LMETZN01       | 132.509       | O4A       |
| DUNXUH13       | 132.947       | O5A       | APANUC         | 132.76        | O4        | WICJAT         | 132.507       | O13       |
| UZOCUK         | 132.945       | O4A       | RAFZIJ         | 132.75        | F3        | KAPBEJ         | 132.498       | O6        |
| PIKVIR         | 132.943       | N4        | DONPAY         | 132.739       | O6        | UXIQUO         | 132.493       | F46       |
| DOMJOH         | 132.941       | Cl4       | AWEJOE         | 132.738       | O3        | AYISEH01       | 132.492       | O4        |
| IVOXEX         | 132.492       | O2        | XARFOP         | 132.231       | O2        | NASLAY         | 132.042       | S1        |
| ENEYAA         | 132.482       | O6        | VEHLUQ         | 132.225       | O69       | QEVEDD         | 132.036       | S6        |



|                |               |           |                |               |           |                |               |           |
|----------------|---------------|-----------|----------------|---------------|-----------|----------------|---------------|-----------|
| SOCSEI         | 132.475       | O5        | LOPFIH         | 132.223       | O2        | KANQEW         | 132.033       | S4        |
| YIKGIL         | 132.471       | N2        | LETMOO         | 132.219       | O4        | TATPUC         | 132.026       | O28       |
| <b>Refcode</b> | <b>∠YZnLB</b> | <b>LB</b> | <b>Refcode</b> | <b>∠YZnLB</b> | <b>LB</b> | <b>Refcode</b> | <b>∠YZnLB</b> | <b>LB</b> |
| IXACUF         | 132.469       | O8        | QUXVUB         | 132.215       | O20       | QIBNOE01       | 132.019       | O4A       |
| HUPXOG         | 132.466       | N3        | ZILTIA         | 132.213       | N6        | KUJNUB         | 132.015       | O3        |
| VIRNUG         | 132.465       | O2        | OFOPOP         | 132.213       | O22       | IPAPEU         | 132.007       | O7        |
| DEHFUR01       | 132.461       | O12       | OYOWIL         | 132.205       | N3        | PUDBUN         | 132.004       | O3        |
| LEYSUG         | 132.457       | O2B       | VUDXAW         | 132.205       | O1G       | IFIZOM         | 132.002       | O1        |
| MAKSOI         | 132.453       | O1        | DEZXIS         | 132.202       | O22       | GASREA         | 131.986       | O2        |
| CIYJOK         | 132.452       | O3        | OYOWEH         | 132.199       | N3        | QARVEL         | 131.978       | S1        |
| UVUFAU         | 132.449       | O11       | FAFROW         | 132.197       | O8        | AYISEH         | 131.974       | O3        |
| CIJXID         | 132.447       | O3        | KUJZAT         | 132.193       | O3A       | GOBHUC         | 131.974       | O5A       |
| RUZQEI         | 132.444       | O5        | ZENQIV         | 132.184       | N3B       | RICNAU         | 131.971       | O3F       |
| WIYCAL         | 132.443       | O11       | NAHGUB         | 132.183       | N4A       | IFAHEC         | 131.969       | N3        |
| NEPLIE         | 132.439       | O6        | UGUQUJ         | 132.18        | O15       | MIK CER        | 131.969       | O2        |
| UDITUZ         | 132.438       | C1        | UPURII         | 132.18        | O1        | KIFNEV         | 131.968       | O4        |
| WISZUT01       | 132.435       | O4        | TESNUC         | 132.174       | O1        | KEHTOJ         | 131.962       | O1A       |
| NOLYIW         | 132.431       | O5        | CAXPUM04       | 132.165       | N2        | FEXPOP         | 131.961       | O19       |
| BEMPIU         | 132.428       | O9A       | ABAXIN         | 132.157       | N3        | LUGLII         | 131.958       | N4        |
| ZEFFEY         | 132.426       | N1        | GUQHOQ         | 132.155       | N5        | KOZLIX         | 131.953       | N8        |
| RENTAG         | 132.425       | N5        | DUWGIN         | 132.155       | O4        | ENEYAA         | 131.949       | O3        |
| YAKCEW         | 132.423       | C14       | FIPRUR         | 132.154       | O1        | QIBNOE02       | 131.948       | O2A       |
| CUBYIJ         | 132.413       | O25       | IQUMIQ         | 132.147       | O3        | FUQHUV         | 131.944       | C12       |
| YEVVOL         | 132.41        | O1        | PEZLOY         | 132.142       | O6A       | EFEBEA         | 131.944       | O4        |
| TAQXAN         | 132.408       | N3A       | KEPGOF         | 132.137       | O10       | LOVSAS         | 131.944       | O4        |
| IPIJ EY        | 132.406       | O4        | VUDQET         | 132.128       | O1G       | GAMFUW         | 131.941       | O4        |
| MAPNAW         | 132.396       | O1A       | EWUXUR         | 132.126       | O4        | LUZDOB         | 131.937       | O28       |
| ICUPUV         | 132.392       | O6        | MUZROP         | 132.122       | O6        | PETXAO         | 131.926       | O10A      |
| ALALEG         | 132.385       | F5        | MOSPAL         | 132.12        | O11       | PUJVEY         | 131.925       | O6        |
| AHOFUZ         | 132.368       | O2        | PUDBIB         | 132.117       | O4        | GAMFUW01       | 131.921       | O3        |
| DEFGIG         | 132.368       | O5        | OGUQAL         | 132.101       | N3        | QEVDED         | 131.907       | S5        |
| YEJXOC         | 132.367       | O6        | VUDPUI01       | 132.098       | O1G       | USITUM         | 131.898       | O3        |
| TUMHAN         | 132.357       | N10       | UCUJIO         | 132.095       | O15       | UDOQAH         | 131.895       | O6        |
| GIXPIQ         | 132.34        | N5        | OVIPEQ         | 132.093       | O9A       | GOZCUT         | 131.894       | O6        |
| IKEMUI         | 132.332       | O3        | XASDIH         | 132.092       | O12       | CIMJOA         | 131.879       | O2        |
| ALELAG         | 132.331       | O5        | UZANEP         | 132.09        | O11       | WACNOE         | 131.875       | S2A       |
| PUGTOC         | 132.319       | N6        | ACACZM01       | 132.088       | O2        | VIZPAY         | 131.864       | O19       |
| IWURAU         | 132.313       | O13       | KARDEO         | 132.086       | N2B       | YELFIH         | 131.863       | O6        |
| TUMHAN         | 132.307       | N6        | RUGYIE         | 132.084       | O23       | MOJKAY         | 131.861       | O12       |
| TIVJIT         | 132.302       | O5        | XELLIK         | 132.08        | N4        | XEHTUA         | 131.859       | O5C       |
| BUZVOI         | 132.298       | O9        | NAKPUM         | 132.065       | O8        | HUKSAK         | 131.858       | O11A      |
| ECAVAF         | 132.278       | N7B       | VUDPUI         | 132.064       | O1G       | XIYFUG         | 131.858       | O4        |
| VUDPIW         | 132.276       | O1G       | VUDPOC         | 132.062       | O1G       | DACCAO         | 131.844       | O1A       |
| MAGBAZ         | 132.267       | O8        | KEWKIH         | 132.056       | O2        | JAIBOO         | 131.84        | O2        |
| ICUPUV         | 132.244       | O2        | WALBOC01       | 132.048       | O8        | ZOCFAB         | 131.831       | O5A       |
| KORDIH         | 132.239       | N7        | XECTEG         | 132.043       | C18       | IWURUO         | 131.812       | O13       |
| EWUYAY         | 132.234       | O4        | LMETZN01       | 132.043       | O1        | XIDNOP         | 131.801       | O7        |
| RETDAZ         | 132.233       | O6        | DEZXUE         | 132.042       | O26       | JUJVER         | 131.787       | N2        |
| SUWSUA         | 131.781       | O1        | MIYMUC         | 131.532       | O6        | VETNAK         | 131.317       | O5        |
| JONNUY         | 131.775       | C15       | ETUCOM         | 131.529       | O2        | RAXNAH         | 131.315       | C11       |
| VUWCIA         | 131.775       | O12       | LUKDOK         | 131.525       | O8        | TUDGUX         | 131.314       | O2        |
| HAGJIK         | 131.774       | O2        | MUZWAF         | 131.525       | O5        | BASZUU         | 131.311       | O53       |
| XANVIR         | 131.766       | O3        | TAXQIW         | 131.522       | N1        | WIRCUX         | 131.305       | O4        |
| JUGXER         | 131.753       | O1        | LIJQOM         | 131.52        | N13       | PAHPIB         | 131.294       | O7        |
| KAPWUV         | 131.752       | O6A       | QEVDED         | 131.515       | S3        | YEKVET         | 131.294       | O3E       |
| WISZUT         | 131.739       | O4        | LARQAA         | 131.514       | O7        | XOZKAY         | 131.29        | O8        |
| SUPLAR         | 131.723       | N7        | KEYZAQ         | 131.496       | O41       | RAXJEH         | 131.288       | O1        |
| QQQAZD01       | 131.716       | O2A       | MCYSZN         | 131.494       | O2A       | NIJZUC         | 131.276       | O6        |
| SOYBEO         | 131.709       | S3        | JUCKIE         | 131.49        | O3        | NOCTOO         | 131.271       | N7        |
| MOYNIA         | 131.708       | O1        | RATZET         | 131.49        | O3        | WALCET         | 131.271       | O7        |

|                |               |           |                |               |           |                |               |           |
|----------------|---------------|-----------|----------------|---------------|-----------|----------------|---------------|-----------|
| XEJFIC         | 131.703       | O9        | AYONAE         | 131.489       | N7        | EFOPOE         | 131.268       | N5E       |
| KAMLER         | 131.701       | O23       | RUZPOR         | 131.484       | O2        | POMFIJ         | 131.266       | O1A       |
| <b>Refcode</b> | <b>∠YZnLB</b> | <b>LB</b> | <b>Refcode</b> | <b>∠YZnLB</b> | <b>LB</b> | <b>Refcode</b> | <b>∠YZnLB</b> | <b>LB</b> |
| AZAQOJ         | 131.698       | O3        | RAJHIU         | 131.482       | O9        | ZOXTAJ         | 131.265       | O10       |
| XEHYAM         | 131.697       | N1        | DOCLAJ         | 131.473       | O7        | KOTTEU         | 131.263       | O4        |
| QIBNOE         | 131.681       | O5A       | FAXCUF         | 131.472       | O3        | ESARAT         | 131.251       | O5C       |
| WICJAT         | 131.679       | O12       | IYUVEF         | 131.462       | O4        | DEZYAL         | 131.236       | O24       |
| FASWED         | 131.677       | O12       | CAHJII         | 131.461       | O3        | SAZXIB         | 131.229       | O4        |
| VUDQET01       | 131.677       | O1G       | ASALIP         | 131.46        | O4A       | HIYNIN         | 131.226       | O4        |
| BEQSUL         | 131.672       | O6        | COFDAE         | 131.46        | O7        | USATIS         | 131.221       | CI1       |
| XECTEG         | 131.672       | O5        | UPUREE         | 131.457       | O1        | CAQPUI         | 131.218       | O11       |
| JANLUF         | 131.665       | O4        | XEGFOE         | 131.448       | O2        | EMURUZ01       | 131.217       | S2A       |
| HOQJUS         | 131.654       | O3B       | MALVAZ         | 131.447       | N22       | VEGMAX         | 131.215       | O15       |
| OSACIX         | 131.654       | O4A       | BEYLAW         | 131.431       | O4D       | DIYXAK         | 131.205       | O1        |
| GICMEM         | 131.647       | O9        | ESAVEB         | 131.429       | O8B       | TEWZAY         | 131.199       | O6A       |
| TUJJOY         | 131.647       | F13       | LMETZN         | 131.427       | O4A       | FEWREH         | 131.192       | O2A       |
| POZHOE         | 131.64        | CI3       | QUXVUB         | 131.424       | O7        | YUZZQIV        | 131.18        | O4        |
| VUDQOD         | 131.639       | O2G       | YITKEV         | 131.422       | O11       | UZAMUE         | 131.162       | O11       |
| RIWZUW         | 131.635       | O9        | YITKEV         | 131.421       | O13       | BELHAD         | 131.16        | S1        |
| QOFKIF         | 131.629       | O20       | XIVMAT         | 131.42        | O2        | VUMVEH         | 131.154       | O2        |
| LMETZN01       | 131.628       | O2        | HEJMOC         | 131.411       | O7        | WOTREF         | 131.152       | O10       |
| RAXNAH         | 131.621       | CI1       | SAEDZN11       | 131.411       | O2        | VEGLUQ         | 131.144       | O15       |
| MULQOA         | 131.613       | O4        | MUZHEV         | 131.406       | O3        | EBEZEU         | 131.13        | O3        |
| SEPMOS         | 131.61        | N2        | TATZOG         | 131.387       | N3        | SAJJIZ         | 131.127       | O12       |
| RIHJID         | 131.607       | O9        | TOHYUM         | 131.38        | O17       | RUPCIQ         | 131.115       | F52       |
| SOKCOM         | 131.602       | O10A      | OSAXIQ         | 131.379       | O3D       | UZANAL         | 131.111       | O11       |
| ARASAO         | 131.594       | CI5       | REJYIS         | 131.37        | O7        | EYERAB         | 131.11        | O2        |
| PIBBUA         | 131.593       | O5        | WICJAT         | 131.356       | O5L       | REJYIS01       | 131.107       | O7        |
| KUJNUB         | 131.586       | N1        | XALJIE         | 131.355       | CI2       | MARDAN         | 131.102       | O25       |
| YEQRES         | 131.583       | O7        | TIRHEJ         | 131.353       | O7        | KEDRAO         | 131.097       | O4        |
| OKUXUQ         | 131.579       | O3        | ZNGLUD02       | 131.347       | O4A       | LOWGIQ         | 131.086       | N6        |
| OYOWEH         | 131.578       | N12       | HEBZAR         | 131.339       | O2Q       | XAXZIG         | 131.086       | O15       |
| VIRNUG01       | 131.576       | O4        | GUPWOE         | 131.338       | S5        | IYUVAB         | 131.085       | O4        |
| XACMOD         | 131.575       | O12       | LUZDOB         | 131.329       | O30       | BONJOE         | 131.081       | O1        |
| GETZAH         | 131.574       | N1        | JUGXER         | 131.326       | O5        | VUWCIA         | 131.075       | O11       |
| HIYXOF         | 131.562       | O7        | AGOTAS         | 131.325       | O6        | CIKQEW         | 131.062       | F7        |
| MIQYER         | 131.539       | O4        | PAQKUR         | 131.324       | O6        | CAWLIY         | 131.056       | N1F       |
| YEPKOW         | 131.533       | O6        | FOCFOV         | 131.318       | N6        | ZUSJII         | 131.038       | O2        |
| GABWEN         | 131.029       | O3        | HOTFED         | 130.813       | O7        | VUPQON         | 130.526       | F4        |
| WEPPUD         | 131.021       | N5        | LEZGAA         | 130.797       | O4        | PIFFEQ         | 130.513       | O3        |
| GOZGOT         | 131.018       | O2        | HEBZEV         | 130.796       | O2Q       | GICLUB         | 130.51        | O21       |
| HUPSIV         | 131.012       | O3        | KESPIJ         | 130.794       | O6        | TUYGAX01       | 130.51        | O1        |
| WUZVIX         | 131.012       | O5        | POCVAG         | 130.793       | N3        | GETNUS01       | 130.507       | N3A       |
| OCOKUM         | 131.011       | S3        | REGRIG         | 130.792       | O4        | RIHJID         | 130.506       | O8        |
| CAQGUY         | 131.01        | O7        | HECWOD         | 130.788       | O17       | SUPLAR         | 130.506       | O6        |
| GAYZIP01       | 131.01        | O1        | CISMAU         | 130.787       | O1        | VOQVOO         | 130.499       | O2        |
| CUBWIG         | 131.003       | O43       | QEPROW         | 130.782       | O3        | LIZYUQ         | 130.489       | O56       |
| FEBFAU         | 131.001       | O7        | MIKHEV         | 130.758       | O7        | NISBIC         | 130.479       | O2G       |
| DUDQUR         | 130.99        | O2B       | YEKVET         | 130.74        | O2D       | DEKGAD         | 130.479       | F2        |
| VUDWUP         | 130.988       | O2G       | AFIRUD         | 130.738       | O5        | HEBZAR         | 130.47        | N4D       |
| NOBYIO         | 130.978       | O11       | SAEDZN10       | 130.732       | O1        | HOPLOQ         | 130.468       | N8        |
| GADLUT01       | 130.956       | O2        | CAPKOW         | 130.728       | F4        | UWUVAK         | 130.454       | F6        |
| UWUVEO         | 130.952       | F12       | TEWZAY         | 130.718       | O16       | HOPTIS         | 130.451       | N12       |
| GAKFEG         | 130.948       | N5        | ZUSBIA         | 130.716       | N3G       | NANZIM         | 130.45        | O8        |
| RAMDOZ         | 130.947       | O4        | XIFYET         | 130.707       | O7        | MAKYUS         | 130.445       | N7        |
| DATFUZ         | 130.946       | O3        | ECURIF         | 130.697       | O4        | DOPGUL         | 130.445       | O2        |
| DEZXUE         | 130.943       | O31       | EKOBUC         | 130.694       | N5        | MOYTUR         | 130.444       | O8        |
| QASYUH         | 130.937       | N2G       | HECWOD         | 130.694       | O16       | WIHMIK         | 130.428       | O10       |
| VETNAK01       | 130.937       | O3        | YULGUK         | 130.683       | O8        | QEPRUC         | 130.422       | O4        |
| SAHFEN         | 130.933       | O4        | DEBSUZ         | 130.67        | O29       | HEBZEV         | 130.416       | N4D       |

|                |               |           |                |               |           |                |               |           |
|----------------|---------------|-----------|----------------|---------------|-----------|----------------|---------------|-----------|
| GUCYOT         | 130.93        | O11       | RIFNAW         | 130.659       | O6        | GEYRIO         | 130.415       | O6        |
| HECJAE         | 130.922       | O17       | HACYEQ         | 130.653       | O6        | VUMNAU         | 130.414       | N3        |
| <b>Refcode</b> | <b>∟YZnLB</b> | <b>LB</b> | <b>Refcode</b> | <b>∟YZnLB</b> | <b>LB</b> | <b>Refcode</b> | <b>∟YZnLB</b> | <b>LB</b> |
| CAXPUM03       | 130.917       | N2        | HUCHOD         | 130.648       | O7        | OYOWIL         | 130.412       | N12       |
| ECUHAN         | 130.912       | O15       | FAYDAN         | 130.646       | O3A       | EMOTOQ         | 130.408       | N2        |
| PENPAD01       | 130.91        | O11       | LIJQOM         | 130.642       | O20       | IXACUF         | 130.403       | O3        |
| WETKEM         | 130.907       | O5        | CEWBUC         | 130.633       | O7        | MUZWAF         | 130.393       | N5        |
| TOHYUM01       | 130.901       | O16       | TUYGAX02       | 130.628       | O1        | XUNJEW         | 130.392       | N4H       |
| EMURUZ         | 130.901       | S1A       | IRUSIY         | 130.612       | N8        | OQOFIK         | 130.389       | N3        |
| ZIGSUD         | 130.892       | O7        | NEQDIW         | 130.612       | O8        | YUSGID         | 130.386       | O5        |
| BAFTAF         | 130.887       | O5        | DUPRAI         | 130.607       | O8        | UVAPIR         | 130.385       | O8        |
| RUCMAE         | 130.884       | O1        | PUDBIB         | 130.606       | N4        | VEHLUQ         | 130.385       | O55       |
| VIZNUQ         | 130.883       | O22       | VEGSAF         | 130.601       | O5        | VUQXUD         | 130.383       | O10       |
| OXIXEA         | 130.881       | C18       | WIHMIK         | 130.599       | O8        | DEGRAK         | 130.382       | N5        |
| IGAQIQ         | 130.879       | O5        | HOPTIS         | 130.595       | N12       | YUPKAW         | 130.379       | O3        |
| TUFHAE         | 130.879       | O15       | NEKWAB         | 130.591       | O6        | UKEZIV         | 130.376       | O1        |
| DUDLUL         | 130.877       | C11       | DUPRAI         | 130.587       | O4        | ZAHSUZ         | 130.354       | O3        |
| IJOSEH         | 130.862       | O2        | BAVSOJ         | 130.582       | O14       | BEMPIU         | 130.347       | O7        |
| GADLUT         | 130.856       | O5        | FAQZAB         | 130.577       | N2        | VADFIR         | 130.342       | O8        |
| JIKZAI         | 130.855       | N3        | IHITUP         | 130.567       | N3        | GETNUS         | 130.338       | N3A       |
| GAYZIP         | 130.845       | O4        | JESREF         | 130.551       | O5        | GOTLIM         | 130.334       | O12       |
| DEHFON         | 130.841       | O8        | WEMZUJ         | 130.547       | O4        | ODEPAR         | 130.333       | O8        |
| YIMQES         | 130.841       | O2A       | EVUJUD         | 130.542       | O1        | UGUQUJ         | 130.329       | O16       |
| NENXUC         | 130.833       | O4        | BOPHAR         | 130.541       | O6        | PUSWAC         | 130.327       | P2        |
| RALQEC         | 130.833       | S2        | TUFHAE         | 130.536       | O15       | WEHVUB         | 130.316       | N4        |
| EHAMEH         | 130.823       | C13       | TUYGAX         | 130.536       | O2        | IFIBAA         | 130.307       | C12       |
| CAQHOT         | 130.823       | O28       | LAWHAV         | 130.534       | O17A      | FESTOQ         | 130.294       | O12       |
| EMOQIH         | 130.814       | O11       | QEPRUC         | 130.53        | O1        | YOXAR          | 130.294       | O11       |
| MUYWAF         | 130.293       | O1        | EMECUV         | 130.01        | N4        | AGAWUA         | 129.756       | O9A       |
| XAXBOP         | 130.291       | O6A       | QELKUQ         | 130.007       | O1        | SUWFEW         | 129.743       | O2        |
| BOFGEL         | 130.29        | O2        | KELJUI         | 130.004       | N3        | DOGMIW         | 129.741       | O5        |
| KIGBIL         | 130.289       | O4        | FIDFUU         | 130.004       | O7        | NEPPED         | 129.74        | O6        |
| EBIKAB         | 130.286       | O10       | TUFTOF         | 129.989       | O2        | QECNEV         | 129.733       | N3        |
| CAQHOT         | 130.284       | O22       | ODIVUU         | 129.984       | O5        | ILOROS         | 129.733       | O17       |
| LIJQOM         | 130.282       | O23       | XOJGEL         | 129.963       | O4        | HOQZUJ         | 129.727       | O3E       |
| LABPIN         | 130.266       | C13       | IKAVEX         | 129.957       | O3        | MIWJOU         | 129.727       | O5        |
| FAKTOD         | 130.266       | O11       | XEHTUA         | 129.949       | N1        | AWIGEU         | 129.712       | O24       |
| BOFVAU         | 130.255       | O7        | JONXIV         | 129.947       | N5        | TUMGAM         | 129.71        | O2        |
| QEXVOH         | 130.245       | O6        | REJYIS01       | 129.945       | O6        | GICTAN         | 129.704       | O10       |
| WUPTEI         | 130.241       | O10       | HOQZUJ01       | 129.934       | O2E       | VETNAK         | 129.701       | C11B      |
| FAXCUF         | 130.23        | O7        | OHUYIB         | 129.934       | O5        | UMAMED         | 129.691       | O2A       |
| SOTBUZ         | 130.226       | O4        | KAPWUV         | 129.932       | O38A      | AGOJOX         | 129.682       | N2        |
| UDOQAH         | 130.217       | O8        | VEHLUQ         | 129.927       | O21       | PATZUF         | 129.672       | O12       |
| ASEDEK         | 130.207       | O4A       | NANZIM         | 129.924       | O7        | KAQGIV         | 129.671       | O10       |
| GUPBOK         | 130.201       | O7        | ZIDBUN         | 129.921       | O3B       | CODVAV         | 129.666       | O10       |
| YUBBOM         | 130.201       | O7        | VEZYOR         | 129.919       | O6        | UXAMEN02       | 129.663       | O7        |
| ZEPPUJ         | 130.198       | O24       | CAXPUM02       | 129.9         | N8        | FEPPID         | 129.66        | O12       |
| RUZQOS         | 130.196       | O7        | CAXPUM05       | 129.889       | N8        | LAVWIO         | 129.649       | O9        |
| YEXJOB         | 130.194       | O2        | LIGVAY         | 129.887       | O4        | POLDOL         | 129.648       | O6A       |
| QEXVOH         | 130.191       | O5        | JEXQEJ         | 129.882       | O9        | VIMKOV         | 129.645       | N2F       |
| PAHROG         | 130.188       | O11       | KEKHEP         | 129.881       | O6        | NANZIM         | 129.64        | O5        |
| DOBGUX         | 130.184       | N7B       | HABRIN         | 129.872       | O6        | MATYIT         | 129.635       | O3        |
| WALBOC02       | 130.176       | O7        | DICDIG         | 129.862       | O2        | HUCLOH         | 129.622       | O5        |
| PUDBUN         | 130.171       | N13       | KUJNUB         | 129.86        | N7        | DUKBIV         | 129.618       | O7        |
| FASWED01       | 130.163       | O12       | EYUMES         | 129.859       | S2        | ASEPIX         | 129.613       | O5        |
| MILWIP         | 130.152       | N3G       | ICOLUK         | 129.858       | O5        | AZIMIH         | 129.61        | O19       |
| HUPXUM         | 130.138       | O6        | WENPIO         | 129.855       | O5        | DAWQIE         | 129.605       | O4        |
| YAVMIS         | 130.125       | O7        | EYEDIY         | 129.852       | N1A       | QAYLEK         | 129.594       | O3        |
| CIDTUH         | 130.12        | N2A       | CISWOR         | 129.847       | O5        | ALUXEM         | 129.592       | O7        |
| EWUXOL         | 130.118       | O7        | OJUHUV         | 129.847       | O6        | YEQYEB         | 129.583       | O5        |

|                |               |           |                |               |           |                |               |           |
|----------------|---------------|-----------|----------------|---------------|-----------|----------------|---------------|-----------|
| RORSOI         | 130.115       | O2        | SIDHET         | 129.842       | O5        | SENJEB         | 129.582       | O6        |
| LERVOV         | 130.108       | O12       | QANCAJ         | 129.841       | CI1       | CEJZAW         | 129.578       | N8        |
| <b>Refcode</b> | <b>∟YZnLB</b> | <b>LB</b> | <b>Refcode</b> | <b>∟YZnLB</b> | <b>LB</b> | <b>Refcode</b> | <b>∟YZnLB</b> | <b>LB</b> |
| QUJCUV         | 130.102       | O11       | AHOMUH         | 129.831       | O6        | NOHDOG         | 129.574       | O4        |
| DIMKAN         | 130.098       | O10       | EQEFOW         | 129.83        | O6        | JAVWOT         | 129.571       | O5        |
| YAXNIX         | 130.09        | O2        | UXUTAK         | 129.824       | N2        | GETPEE         | 129.564       | N3B       |
| LIDWAA         | 130.078       | O20       | PENPAD         | 129.808       | O11       | PUXNEB         | 129.562       | O1        |
| LEZGAA         | 130.071       | N2        | KAKFEL         | 129.805       | O9        | DIMKAN         | 129.551       | O4A       |
| PAVZES         | 130.06        | O5        | RUDROA         | 129.804       | F4        | FOZGIN         | 129.55        | O9A       |
| QEVDED         | 130.057       | S4        | JUKHII         | 129.803       | O12A      | NOCGUH         | 129.549       | O3        |
| MIKCER         | 130.053       | O14       | ASULAD         | 129.801       | O3        | EBIKAB         | 129.544       | O4        |
| OKUXUQ         | 130.05        | O10       | ILOROS         | 129.799       | O21       | PUXNEB01       | 129.538       | O2        |
| DEXPAB         | 130.045       | CI3       | RUPSUS         | 129.798       | O3C       | FEBFAU         | 129.534       | CI1       |
| RUPCIQ         | 130.036       | F107A     | LAFXUP         | 129.788       | F1        | COMVIK         | 129.522       | O5        |
| TEFLIA         | 130.035       | CI2       | VAPXUG         | 129.786       | CI1       | FEKWUP         | 129.522       | O3        |
| QEPROW         | 130.03        | O5        | PENQIK         | 129.769       | O4        | XUYVAS         | 129.518       | O6        |
| XUNWIM         | 130.03        | O3        | IKEYAA         | 129.767       | N6        | POLKIL         | 129.515       | O10       |
| GUFQEE         | 130.015       | O7        | FEBFAU         | 129.757       | O7        | QELKUQ         | 129.498       | O1        |
| RICNAU         | 129.493       | O6        | SIJREJ         | 129.245       | O5        | JAKPAN         | 128.953       | O7        |
| HOKTUY         | 129.485       | S3        | HATCEN         | 129.242       | O2        | LIQDOH         | 128.933       | O37       |
| DEZXUE         | 129.474       | O21       | QUJZAZ         | 129.221       | O5D       | SACWEB         | 128.927       | O3C       |
| EYERAB         | 129.473       | O45       | ROYTIL         | 129.22        | O7        | VEHLUQ         | 128.915       | O68       |
| QOCVIN         | 129.473       | F3        | UMAWOV         | 129.219       | O11       | CAHHOL         | 128.913       | CI3       |
| ZAHSUZ         | 129.465       | O3        | AZAQOJ         | 129.205       | O4        | SEZMIW         | 128.911       | O1        |
| PIBCAH         | 129.456       | N1A       | IGAQEM         | 129.204       | O5        | ARASOC         | 128.91        | CI1       |
| AWIGAQ         | 129.452       | O26       | MEPXEL         | 129.186       | O12       | NICWIF         | 128.908       | O2        |
| DUFKAT         | 129.451       | O2A       | FIDFUU         | 129.178       | O11       | ODUSEL         | 128.905       | O14       |
| LIQDOH         | 129.449       | O28       | UMOVIC         | 129.177       | O6        | NENCOZ         | 128.904       | O4        |
| POPPOS         | 129.443       | N5A       | IHALUB         | 129.175       | O2        | PUDCEY         | 128.898       | N13       |
| YUBFUX         | 129.432       | N2J       | QAHGEM         | 129.155       | S4A       | QAKMAQ         | 128.879       | O3        |
| HEXGUO         | 129.427       | O7C       | ILIZEJ         | 129.146       | N2        | ICUBUE         | 128.873       | CI1       |
| WEMWAP         | 129.422       | O3EA      | TIVJIT         | 129.141       | O31       | ADOMAL         | 128.858       | O1B       |
| ZOLXUT         | 129.422       | O3F       | YAXNIX         | 129.141       | O8        | QOXREB         | 128.842       | N3        |
| MIGNUN         | 129.421       | F14       | HESPOK         | 129.135       | O5        | MIXWUO         | 128.838       | O27       |
| SECXUU         | 129.414       | O5        | HESPOK10       | 129.135       | O5        | JAYJOJ         | 128.824       | O12       |
| HAGHII         | 129.402       | O8        | ASUXUJ         | 129.134       | O12       | MOJKAY         | 128.821       | O85       |
| MEXRIT         | 129.397       | O17       | MIKNEA         | 129.13        | O4        | PEGVOQ         | 128.821       | O2        |
| AGUPUO         | 129.395       | O1        | DAYPUQ         | 129.12        | O3        | FOJWAE         | 128.815       | O4B       |
| YOJSUM         | 129.388       | O7        | HUVJAL         | 129.11        | O11A      | EYERAB         | 128.811       | O18       |
| MUSMAQ         | 129.386       | O9        | QEHZAH         | 129.109       | O4        | KAPWUV         | 128.81        | O33       |
| OPOBAX         | 129.377       | O4        | QOMFEF         | 129.101       | O41       | XIVMAT         | 128.809       | O6        |
| FAWLAS         | 129.376       | O18       | HUZRUQ         | 129.1         | S4A       | YEFQOR         | 128.808       | F7        |
| LECMOW         | 129.376       | O2        | XEGTEM         | 129.091       | O6        | ZOXTAJ         | 128.803       | O2A       |
| HOTNIQ         | 129.371       | O17       | LADFUT         | 129.082       | O7        | QEXVOH         | 128.802       | O5        |
| XOJXIE         | 129.364       | O2        | FUPQOW         | 129.078       | O20       | HALGUZ         | 128.798       | O18       |
| ZOVSIM         | 129.363       | O1        | MILWIP         | 129.066       | O2Q       | IYUVOP         | 128.798       | O4        |
| XEMYUM         | 129.356       | O5A       | FACLII         | 129.063       | O1        | DAWQOK         | 128.797       | O2        |
| GACWUG         | 129.355       | O6        | FOSQOV         | 129.059       | O41       | AFUWEG         | 128.796       | O17       |
| GOSNAG         | 129.353       | O6        | NHBZZN10       | 129.045       | O4        | NEJGER         | 128.791       | O13       |
| CANJAG         | 129.35        | N6        | SIVXAY         | 129.043       | O3A       | YETJIR         | 128.787       | O2        |
| HUCHOD         | 129.35        | O6        | NONNEM         | 129.037       | O6        | QISXAT         | 128.784       | N14       |
| FICBOM         | 129.344       | O8        | LIDWAA         | 129.025       | O16       | XOQZUZ         | 128.776       | O2        |
| JIDXEC         | 129.344       | F19       | VETNAK01       | 129.022       | CI1       | CAVXOP         | 128.774       | N3A       |
| SAZXIB         | 129.329       | O2        | KAPWUV         | 129.017       | O9        | SOCGOJ         | 128.768       | O1        |
| REPQEM         | 129.322       | O7        | QOSKIS         | 129.017       | O6        | JUWBIO         | 128.765       | N3A       |
| QICTEC         | 129.321       | O1F       | DAXGUF         | 129.016       | O4        | IQUMIQ         | 128.765       | O8        |
| XUNJEW         | 129.321       | O2P       | TOFSOW         | 129.009       | O6        | HIWHOL         | 128.764       | O1        |
| MAPNAW         | 129.316       | O8A       | DUKBIV         | 129.005       | O4        | OHIYEL         | 128.757       | N5A       |
| RIHDUJ         | 129.316       | O3        | MEXRIT         | 128.998       | O16       | EFUDOB         | 128.751       | O3        |
| OKUXUQ         | 129.296       | O9        | ODUSEL         | 128.991       | O12       | LIXTUJ         | 128.749       | O5        |

|                |               |           |                |               |           |                |               |           |
|----------------|---------------|-----------|----------------|---------------|-----------|----------------|---------------|-----------|
| MAGBIH         | 129.285       | O10G      | VIQNOA         | 128.989       | O7        | QICTEC         | 128.744       | O2E       |
| EQECOV         | 129.283       | O4        | JIDREX         | 128.977       | N3        | IJOSEH         | 128.738       | O2        |
| <b>Refcode</b> | <b>∠YZnLB</b> | <b>LB</b> | <b>Refcode</b> | <b>∠YZnLB</b> | <b>LB</b> | <b>Refcode</b> | <b>∠YZnLB</b> | <b>LB</b> |
| OFIQU01        | 129.278       | F1        | HEBNEJ         | 128.972       | O23       | QUHVUM         | 128.738       | F24       |
| JARLAT         | 129.273       | O14       | KAPWUV         | 128.971       | O74       | MATKAX         | 128.737       | P3        |
| BODBIF         | 129.262       | O5        | DOMYUC01       | 128.97        | O4F       | JOHMAW         | 128.733       | O12       |
| DEPYON         | 129.247       | O8        | IQIXAH01       | 128.97        | O3        | MOJKAY         | 128.733       | O76       |
| FACLI02        | 129.246       | O2        | UQEVUK         | 128.969       | O7        | POLRIU         | 128.73        | O3        |
| XICMUU         | 128.712       | O2        | AGUPUO         | 128.385       | O1        | AFEGAV01       | 128.008       | O2        |
| BUYBAZ         | 128.709       | O4        | PEFEX          | 128.38        | O1        | ZIPIU          | 128.007       | N6        |
| TIQBEB         | 128.7         | O14       | OJITAC         | 128.378       | O3        | KETTIN         | 128.007       | O6        |
| QARCET         | 128.695       | N17       | LUWTOM         | 128.374       | O8        | QEKNAZ         | 127.983       | O2        |
| YETJIR         | 128.692       | O5        | HIQREF         | 128.368       | O3        | JISMEG         | 127.972       | O9        |
| TUFHAE         | 128.69        | O13       | QUFFED         | 128.355       | O2C       | GIQZUF         | 127.962       | O3        |
| RUWMUT         | 128.679       | N32       | WAMXEQ         | 128.355       | O1        | QAYGAY         | 127.96        | O8        |
| OFIQU5         | 128.676       | F1        | AFEGAV         | 128.348       | O1        | QAKLEU         | 127.958       | O2        |
| IKAVEX         | 128.671       | O2        | BAHTOT         | 128.347       | O8        | JETRUZ         | 127.956       | O4        |
| VAJSUW         | 128.669       | O3        | NUFBIB         | 128.347       | O6        | KEYLEG         | 127.936       | CI2       |
| VIQMEO         | 128.663       | O5        | QUGWOF         | 128.347       | O4        | MAPMOJ         | 127.924       | O8A       |
| AWIGUK         | 128.66        | O25       | OFIQU02        | 128.341       | F1        | LIMNOL         | 127.915       | O3        |
| OFUGAY         | 128.659       | O10       | XIFWAM         | 128.34        | O2        | JAHNOY         | 127.903       | O6        |
| JAZKII         | 128.653       | O1A       | UFEBIT         | 128.329       | O4        | OHUYIB         | 127.897       | O2        |
| BECSIO         | 128.651       | O5        | CAVVAY         | 128.324       | O1        | POCCER         | 127.877       | CI1       |
| DAWQIE         | 128.644       | O6        | SEHLAU         | 128.311       | CI2       | ABUQEW         | 127.872       | O10       |
| KOZJUH         | 128.633       | O15       | OTOZOO         | 128.301       | O2C       | XOMMET         | 127.87        | O3        |
| KEJFAK         | 128.629       | O6        | BOFVAU         | 128.299       | O4        | OYOWEH         | 127.868       | N19       |
| XOJXIE         | 128.628       | O3        | CODQOC         | 128.281       | S6        | UTIPUK01       | 127.866       | O2A       |
| YENSEQ         | 128.624       | N9        | TIVJIT         | 128.279       | O29       | BOPZAJ         | 127.859       | O3        |
| YEGGOJ         | 128.623       | N4        | JAJBOO         | 128.27        | O3        | VIIJAJ         | 127.858       | O5B       |
| WIYFES         | 128.606       | O15       | MAPLIA         | 128.256       | O1        | CEYSEF         | 127.857       | O4        |
| PAYCAX         | 128.566       | N2        | FAFJIH         | 128.251       | O6        | GOKXOT         | 127.836       | S2        |
| OYAPOV         | 128.565       | O3        | IFIBAA         | 128.215       | CI1       | RICKIA         | 127.829       | O5        |
| XOLCEH         | 128.565       | O14       | QOMFEF         | 128.214       | O55       | TEXRUM         | 127.828       | O3        |
| WIYCAL         | 128.538       | O9        | YAKBIY         | 128.212       | O5        | UGOQUE         | 127.827       | O9        |
| VUQXOX         | 128.502       | O5A       | CAVVIG         | 128.204       | O16A      | YAXNIX         | 127.768       | O10       |
| XACGUD         | 128.498       | O5        | MAHTAS         | 128.197       | O9        | CEXSOO         | 127.766       | O2        |
| LENSON         | 128.494       | O3        | TUFHAE         | 128.192       | O13       | ZUFQEY         | 127.764       | O5A       |
| AXAVAZ         | 128.478       | O8        | JOHMAW         | 128.191       | O8        | QOMFEF         | 127.755       | O40       |
| LUFXUI         | 128.478       | O5        | VUYBEX         | 128.184       | O2        | KEYLEG         | 127.754       | O3        |
| FEPPEZ         | 128.477       | O10       | OYOWIL         | 128.173       | N19       | TOFSOW         | 127.741       | O12       |
| FASWED01       | 128.473       | O5        | DUHNUQ         | 128.154       | CI2       | BAXQUN         | 127.735       | O5        |
| LIGVAY         | 128.468       | O7A       | YAPNAI         | 128.145       | O5        | TUJWIH         | 127.732       | O4        |
| NIXKEM         | 128.465       | O2D       | KUBNAX         | 128.139       | O2        | XOVVOU         | 127.726       | N5G       |
| TIBQAA         | 128.44        | O1        | MOQGAB         | 128.132       | O4        | ALUXEM         | 127.722       | O4        |
| PALHUG         | 128.431       | O7        | KOQJIL         | 128.129       | O4A       | RIWWOK         | 127.713       | O1B       |
| ALUXEM         | 128.43        | O3        | DEHFUR01       | 128.124       | O7        | WUCFEI         | 127.709       | O2        |
| KAPWUV         | 128.411       | O47       | GICTAN         | 128.102       | O9        | WUPTAE         | 127.699       | O11       |
| DEZXIS         | 128.408       | O25       | MEHBIL         | 128.101       | O2        | MAPLIA         | 127.697       | O1        |
| YUKKIY         | 128.408       | O6        | TAPRIO         | 128.07        | O1        | TIMQEM         | 127.691       | O3        |
| YUKKIY10       | 128.408       | O6        | FUPQOW         | 128.069       | O19       | PAHQAU         | 127.684       | O8        |
| ALUXEM         | 128.406       | O6        | MOHLEB         | 128.063       | O4F       | NOXBK          | 127.683       | O16       |
| UFEBIT01       | 128.399       | O4        | ARAFOQ         | 128.049       | O6        | WIWBUA         | 127.673       | N2        |
| WUSFAU         | 128.395       | N6        | ADUROH         | 128.043       | O4        | MEJMAT         | 127.666       | O2A       |
| XECTEG         | 128.395       | CI4       | NOHDOG         | 128.036       | O1        | FIKNIX         | 127.662       | O8        |
| JEBTOA         | 128.392       | O2        | ABEGOG         | 128.033       | O2        | LEDLAJ         | 127.66        | O9        |
| WEYFIR         | 128.389       | N2        | RAXSIU         | 128.033       | O1        | DUGYOU         | 127.659       | O13       |
| IGUDUK         | 128.386       | O7        | WIQSAS01       | 128.01        | O14       | ROYIYQ         | 127.647       | O3        |
| NABMAF         | 127.64        | O3        | DEZXIS         | 127.318       | O31       | QIDQUT         | 126.997       | O11       |
| VIGBAQ         | 127.635       | O6        | ESOUUG         | 127.315       | O10       | PUSWAC         | 126.994       | F10       |
| DEHFIH         | 127.629       | O11       | KUBNAX         | 127.309       | O8        | LALTAV         | 126.993       | O6        |

|                |               |           |                |               |           |                |               |           |
|----------------|---------------|-----------|----------------|---------------|-----------|----------------|---------------|-----------|
| POLDOL         | 127.619       | O1A       | BECSEK         | 127.301       | O6C       | LISXEU         | 126.993       | O10       |
| BUZGUZ         | 127.61        | O4        | IFABIA03       | 127.301       | O1F       | TUMGAM         | 126.987       | N4        |
| <b>Refcode</b> | <b>∟YZnLB</b> | <b>LB</b> | <b>Refcode</b> | <b>∟YZnLB</b> | <b>LB</b> | <b>Refcode</b> | <b>∟YZnLB</b> | <b>LB</b> |
| HIVBAR         | 127.576       | O5        | YEXLAR01       | 127.284       | N4        | QARBOC         | 126.986       | N3D       |
| CAGLAB         | 127.575       | O3        | HOPLOQ         | 127.283       | O3        | ZUNFIZ         | 126.981       | CI2       |
| MAGBIH         | 127.57        | O8A       | ENEYEE         | 127.277       | O5        | CAPWAU         | 126.98        | O1        |
| MEPXEL         | 127.563       | O10       | IVODEC         | 127.275       | O8        | ROCWAH         | 126.975       | O6        |
| LIMDOE         | 127.553       | O5A       | RANQAA         | 127.267       | O2        | REFDEN         | 126.974       | O10       |
| DEBSUZ         | 127.551       | O7        | RAMLIE         | 127.261       | O23       | DIJMOA         | 126.97        | S2        |
| LIDWAA         | 127.548       | O15       | OHALAL         | 127.245       | O4        | TAPREK         | 126.963       | O7        |
| JITCIZ         | 127.543       | S1        | RUZQAE         | 127.236       | O4        | LEQWIP         | 126.956       | O2        |
| KESPIJ         | 127.541       | O2A       | IJEXOL         | 127.23        | O5        | TAPRIO         | 126.938       | O7        |
| AHISER         | 127.539       | O8C       | ASEPIX         | 127.221       | O7        | EDANOM         | 126.936       | O2        |
| REXNUG         | 127.538       | O1        | HAIJBAW        | 127.191       | O1        | FAHMIM         | 126.935       | O4B       |
| TOMKEN         | 127.537       | O8        | ESoyUG01       | 127.19        | O5        | MOJSUA         | 126.933       | O5        |
| HERTEE         | 127.533       | CI4       | HEBNEJ         | 127.163       | O23       | RICDIR         | 126.916       | N5C       |
| WEMXAP         | 127.523       | O2        | YALKUR         | 127.163       | O3        | MIXWEY         | 126.913       | O13       |
| YEXLAR         | 127.511       | N4        | ZUSBIA         | 127.162       | N5        | GIXDOH         | 126.909       | O2        |
| MIXXAV         | 127.509       | O13       | PUKTUM         | 127.154       | O8        | GLYZNS10       | 126.907       | S1        |
| JUKHAA         | 127.495       | O2        | RUPLEV         | 127.148       | F30       | POGMIK         | 126.903       | O7        |
| DEFHUT         | 127.491       | O6        | MADYID         | 127.129       | N5        | BICJEG         | 126.897       | O17       |
| SAPNOO         | 127.488       | O1        | YULGUK         | 127.129       | O10       | TOFSOW         | 126.894       | O18       |
| BEPJOY         | 127.478       | O1        | WUMXIM         | 127.125       | O6        | KUKXAS         | 126.893       | O2        |
| UQETUI         | 127.47        | O7        | PIKYOY         | 127.119       | O8        | QALHET         | 126.891       | O12       |
| JAPIU          | 127.467       | O9        | AFIRUD         | 127.116       | O6D       | QAHHEP         | 126.876       | O3        |
| BAXQUN01       | 127.461       | O6A       | IKUWIW         | 127.111       | N2        | ASUXOD         | 126.87        | O35       |
| YAXNIX         | 127.46        | O15       | EHEWIY         | 127.107       | N2        | PESYIV         | 126.862       | O3        |
| TAPREK         | 127.458       | O6        | JETVUC         | 127.103       | O4        | REPQEM         | 126.847       | O3        |
| MULQOA         | 127.437       | O14       | TUDGUX         | 127.091       | O5        | UTEKAG         | 126.838       | O10       |
| MURQIA         | 127.434       | O2        | HOPLOQ         | 127.089       | O4        | KUKXAS         | 126.835       | O4        |
| IWORET         | 127.424       | O3        | ESoyUG         | 127.087       | O1        | DEHFUR         | 126.834       | O19       |
| JIQDUM         | 127.415       | O4        | GASSAX         | 127.071       | O1        | FASWED         | 126.827       | O22       |
| CEPJUE         | 127.411       | O3        | DOTHEB         | 127.07        | O6        | HAWWAE         | 126.814       | O2        |
| XAVKEN         | 127.409       | O10       | RUWMUT         | 127.068       | O26       | AWIGIY         | 126.811       | O26       |
| SIYSUQ         | 127.407       | O1        | MIXWIC         | 127.066       | O13       | MIMRAB         | 126.799       | O1E       |
| TECGUF         | 127.406       | O1        | KIMWUA         | 127.063       | O3        | KEKHEP         | 126.774       | O2        |
| JUQPES         | 127.402       | N5        | RUWMED         | 127.052       | O90       | IKEYAA         | 126.747       | O11       |
| EPITEF         | 127.398       | N9        | NAPFAN         | 127.048       | O5        | MIMRAB02       | 126.746       | O2        |
| CANJEK         | 127.395       | N6        | YELFED         | 127.047       | O1        | UMAVOW         | 126.745       | O15       |
| USATIS         | 127.39        | O4        | TOFSOW         | 127.041       | O8        | VIVDUB         | 126.733       | O2E       |
| SIHJEZ         | 127.387       | O4        | BETTEC         | 127.032       | O6        | GUJFIB         | 126.726       | O1B       |
| QOMFEF         | 127.373       | O51       | ULIBOG         | 127.031       | O4        | PUWKUP         | 126.724       | O1        |
| XODTAL         | 127.369       | O9        | FAXZAJ         | 127.03        | N10       | YIHLOS         | 126.711       | O3D       |
| WUDMAJ         | 127.36        | O5        | FAQZAB         | 127.023       | N1        | KUBNAX         | 126.707       | O11       |
| CAPWAU         | 127.345       | O7        | AVIMOI         | 127.022       | O1        | IGOPAW         | 126.702       | O2        |
| RAXNAH         | 127.333       | O19       | MIXWOI         | 127.007       | O13       | TERQEM         | 126.661       | O1        |
| IFABIA01       | 127.323       | O2        | MALFOU         | 127.003       | O9        | IFABIA02       | 126.648       | O4        |
| JOHLOJ         | 126.648       | O6A       | SIJREJ         | 126.281       | O2        | WAMZAN         | 125.765       | O2C       |
| JUZQAY         | 126.635       | O2        | FAXCUF         | 126.267       | O6C       | IWORET01       | 125.761       | O3        |
| QEXMEO         | 126.633       | O2        | QEXJAF         | 126.263       | O3        | MUYCOB         | 125.76        | O1        |
| KAWXUB         | 126.618       | O3B       | LOQLAF         | 126.261       | O5        | POKQEO         | 125.751       | O8        |
| XECTEG         | 126.618       | O1        | FAYROM01       | 126.226       | N6        | UTIPUK01       | 125.75        | O1C       |
| WEXFIQ         | 126.611       | O7        | LACGAA         | 126.211       | O1        | LERVOV         | 125.749       | O9        |
| LEZGAA         | 126.608       | O4        | LUMCIH         | 126.184       | O9        | LUMCED         | 125.694       | O9        |
| QECGIS         | 126.607       | N1        | DEKCEF         | 126.169       | O3        | DEHFUR01       | 125.693       | O19       |
| MIMRAB01       | 126.6         | O4        | AZUCIH         | 126.168       | O2        | FAXZAJ         | 125.69        | N5        |
| OHIYEL         | 126.588       | O6        | XODTAL         | 126.161       | O10       | FERFIU         | 125.686       | O2        |
| NIJTIJ         | 126.58        | O1        | CIYJOK         | 126.157       | O7        | DURMAF         | 125.685       | O4        |
| QECGEO         | 126.572       | N1A       | LODNOK         | 126.14        | O4        | XIRFEK         | 125.684       | O12       |
| QAYGAY         | 126.568       | O3B       | XIMWAS         | 126.132       | O10       | HOXMIQ         | 125.682       | O5        |

|                |               |           |                |               |           |                |               |           |
|----------------|---------------|-----------|----------------|---------------|-----------|----------------|---------------|-----------|
| ORUZOS         | 126.561       | N4        | PIJGUM         | 126.13        | N8        | ULEQEJ         | 125.681       | N1        |
| TIRHEJ         | 126.55        | O5        | ALUWIQ         | 126.122       | O2        | CITTUW         | 125.657       | O4        |
| <b>Refcode</b> | <b>∠YZnLB</b> | <b>LB</b> | <b>Refcode</b> | <b>∠YZnLB</b> | <b>LB</b> | <b>Refcode</b> | <b>∠YZnLB</b> | <b>LB</b> |
| NABMAF         | 126.547       | O4        | BOHYED         | 126.122       | O3        | NIQSUD         | 125.646       | O1        |
| XOVBAL         | 126.534       | O6        | LIWXEV         | 126.116       | O2A       | UGUQUJ         | 125.63        | O15       |
| QUKRAS         | 126.53        | O3        | AHOMUH         | 126.105       | O1        | WARCAV         | 125.63        | O4        |
| ZAQXEX         | 126.521       | O1        | KUHCIC         | 126.096       | O14       | WALBOC01       | 125.621       | N6D       |
| MODHOD         | 126.507       | O3        | MAPMUP         | 126.084       | O1B       | LIMGOF         | 125.621       | O9        |
| JESREF         | 126.505       | O4        | OBUMUU         | 126.06        | O17       | QIPLAE         | 125.616       | O4        |
| EPITEF         | 126.501       | N1        | YEPKUC         | 126.06        | O8        | YEKVAP         | 125.611       | O3G       |
| ICOLUK         | 126.485       | O6        | WALBOC         | 126.046       | N3D       | ORETAH         | 125.593       | O7        |
| VOQDEL01       | 126.464       | O1        | PAHROG         | 126.046       | O10       | QOMFEF         | 125.588       | O46       |
| RUNSOI         | 126.461       | O3        | ALONEU         | 126.043       | O10       | TAYBII         | 125.586       | O1        |
| YACFUE         | 126.435       | N5        | HUVJAL         | 125.985       | O7A       | OGOWEN         | 125.579       | N4        |
| GIKRIF         | 126.428       | O10A      | TERQEM         | 125.983       | O4        | QUZWEO         | 125.577       | O1A       |
| EBALAY         | 126.427       | O19       | OBUMUU         | 125.942       | O1        | AXOTEP         | 125.575       | O1        |
| MADYID         | 126.423       | N12       | RIDWUX         | 125.941       | O4        | UGADIP         | 125.569       | O9        |
| MOSNEN         | 126.418       | O7        | ALEKOT         | 125.933       | N5        | SEBBAF         | 125.566       | O17       |
| WENWUI         | 126.418       | O4F       | POWDOV         | 125.931       | O6        | JARKOG         | 125.554       | N2J       |
| XEBSIG         | 126.416       | O5        | LEBHUY         | 125.929       | O3        | IHIVAX         | 125.532       | N5        |
| XOXBUI         | 126.414       | N2A       | GIKQEA         | 125.916       | O4A       | AJOVUS         | 125.528       | O10       |
| ICOLUK         | 126.391       | O6        | GECXUH03       | 125.909       | O6        | NEPWIO         | 125.519       | O4        |
| OZOQAX         | 126.383       | O2        | ENECIM         | 125.904       | N1        | POCCER         | 125.506       | CI1       |
| OHUQAJ         | 126.371       | O14       | CABPAA         | 125.904       | O6        | QAHHEP         | 125.505       | O4        |
| YODYUO         | 126.371       | S1        | KADSEP         | 125.903       | O3        | MOJKAY         | 125.501       | O13       |
| SOKFUW         | 126.367       | O6A       | DEHFUR         | 125.899       | O8        | VAVBUQ         | 125.499       | N3        |
| ZITMIB         | 126.351       | N5F       | NOCTOO         | 125.881       | CI1       | YAKBIY         | 125.485       | O1        |
| DEZYAL         | 126.35        | O27       | GECXUH01       | 125.879       | O6        | VAXVUL         | 125.48        | CI2       |
| SAPNOO         | 126.346       | O3        | MACHIJ         | 125.863       | O10K      | OSACIX         | 125.472       | O4        |
| IZAZAL         | 126.34        | O8        | TEFQIE         | 125.863       | O4        | HEVSEI         | 125.467       | O18       |
| DAXGUF         | 126.333       | O6        | OFURAK         | 125.862       | O9        | GUPWUK         | 125.462       | S5        |
| UDOQAH         | 126.304       | O7        | HEZFAU         | 125.846       | CI4A      | GUTZAX         | 125.46        | O3        |
| GLYZNS10       | 126.302       | O9        | GECXUH         | 125.838       | O6        | GECXUH02       | 125.447       | O1        |
| FAYROM         | 126.293       | N8        | ESIWEK         | 125.817       | O2C       | VIRLAK         | 125.41        | O92       |
| FIRPOO         | 126.292       | O4        | FAMFAC         | 125.815       | N3G       | GUTZAX01       | 125.405       | O1        |
| QUFGII         | 126.29        | O10       | ETOJII         | 125.806       | O2        | EBEZEU         | 125.4         | O12       |
| CEZEZV         | 126.282       | O11       | JAQRIG         | 125.784       | N2H       | OKUXUQ         | 125.393       | O3        |
| DOHPAT         | 125.368       | O5B       | MOPFUU         | 124.999       | N2L       | DEZXUE         | 124.543       | O24       |
| KELTUR         | 125.361       | O5        | WOLKUF         | 124.987       | O3        | QEHZEL         | 124.541       | N1        |
| LUKDOK         | 125.353       | O8        | KEXPOT         | 124.982       | CI1       | LAYLAB         | 124.541       | O1        |
| GUTZAX         | 125.343       | O5        | NALNIZ         | 124.981       | O2        | LISZEU         | 124.51        | O1        |
| FASWED         | 125.341       | O1        | CIFBUQ         | 124.973       | O1        | KOZJUH         | 124.501       | O4        |
| KIRMOR         | 125.326       | O2        | HOHGAN         | 124.963       | CI1       | HALGUZ         | 124.476       | O20       |
| UKEHOJ         | 125.319       | O21       | FAWLAS         | 124.962       | O19       | WIMDOP         | 124.464       | O4        |
| IKEYAA         | 125.312       | O6        | LETRIP         | 124.961       | F1        | QOSCIM         | 124.463       | O7        |
| DEZXUE         | 125.31        | O21       | KEPGOF         | 124.951       | O3        | NILWEM         | 124.455       | N2        |
| CEZVIO         | 125.303       | O8        | HAXJEX         | 124.947       | O8        | HAPCIO         | 124.453       | N2C       |
| UWEDOQ         | 125.299       | O25       | XOZJOL         | 124.947       | O6        | FELBUU         | 124.45        | O3        |
| BIBGOJ         | 125.298       | O5        | VUKYAE         | 124.934       | O6        | NEHGAK         | 124.448       | O4E       |
| IWORET         | 125.296       | O2        | SENJEB         | 124.918       | O5        | ZEJXOE         | 124.429       | O1        |
| VAKTIO         | 125.295       | O15       | SOMKUC         | 124.912       | O8        | ELIYUU         | 124.412       | N2        |
| CEPLUF         | 125.288       | O4        | HAHCIF         | 124.903       | O4        | QARVIP         | 124.411       | O2        |
| WEYFIR         | 125.288       | O8        | QUCZUK         | 124.903       | O3        | LISZEU         | 124.41        | O11       |
| POMFIJ         | 125.287       | N2E       | AHONIW         | 124.902       | O3B       | YOTVIO         | 124.392       | O2        |
| ACOCIF01       | 125.28        | N2        | DUBHEO         | 124.89        | O6        | QEMDOB         | 124.39        | O5        |
| FURDEB         | 125.235       | O22       | BEJZEW         | 124.884       | N2        | PUFYAR         | 124.381       | O7        |
| QECNAR         | 125.22        | N4        | NENCOZ         | 124.843       | O2        | REPJUS         | 124.375       | N2        |
| ICUBUE         | 125.205       | CI1       | MIGXIM         | 124.811       | O4B       | GIWHEA         | 124.363       | CI2       |
| ACACZM02       | 125.202       | O1        | QITRET         | 124.8         | O4D       | ACUGUD         | 124.337       | N4        |
| YUCKAJ         | 125.19        | O9        | FAFROW         | 124.775       | O11       | ALONEU         | 124.335       | O11       |

|                |               |           |                |               |           |                |               |           |
|----------------|---------------|-----------|----------------|---------------|-----------|----------------|---------------|-----------|
| QASZAO         | 125.175       | F2        | REGRIG         | 124.746       | O11G      | DUFKAT         | 124.329       | O1        |
| YUDMAM         | 125.174       | N2        | KASQUS         | 124.739       | O13       | ALUWIQ         | 124.322       | O4A       |
| <b>Refcode</b> | <b>∠YZnLB</b> | <b>LB</b> | <b>Refcode</b> | <b>∠YZnLB</b> | <b>LB</b> | <b>Refcode</b> | <b>∠YZnLB</b> | <b>LB</b> |
| TOMTAR         | 125.171       | N1        | ESIWEK         | 124.711       | O1C       | CIFHIJ         | 124.316       | O2        |
| MAPNEA         | 125.166       | O2A       | MIGNUN         | 124.711       | O6        | ICUNUS         | 124.312       | O6        |
| MAPNEA         | 125.163       | O1A       | YAPNAI         | 124.706       | O8A       | DOKRIG         | 124.306       | O1        |
| ERIKOG         | 125.161       | O2        | GUQTOB         | 124.686       | O10A      | WEJXAO         | 124.304       | N3H       |
| FIKNIX         | 125.152       | O13       | DUDQUR         | 124.679       | O5        | ETIDOD         | 124.303       | O3A       |
| ASIZAG         | 125.143       | O3        | FISDIY         | 124.672       | O14       | CISCEO         | 124.301       | O2        |
| LACGAA         | 125.138       | O3        | HEZFAU         | 124.664       | CI1       | DEZXIS         | 124.286       | O25       |
| NAQKOH         | 125.126       | N4A       | DAWQIE         | 124.661       | O8        | FECHIG         | 124.258       | O3        |
| HUNMUA         | 125.121       | O1        | UWEDUW         | 124.66        | O25       | QEHZIP         | 124.254       | N1        |
| ACACZM         | 125.108       | O5        | OKOKEG         | 124.645       | O2        | LEYRAJ         | 124.236       | N4        |
| FIDFUU         | 125.091       | O8        | XASCUQ         | 124.636       | O3        | MUMTOD         | 124.235       | O6        |
| MOJKAY         | 125.091       | O28       | NEPLIE         | 124.626       | O1        | HALGUZ         | 124.234       | O19       |
| TOTVEF         | 125.088       | N2        | QOYSEF         | 124.626       | O12       | KEYLEG         | 124.225       | CI1       |
| QISXAT         | 125.077       | N16       | RUWMED         | 124.623       | O89       | TOFSOW         | 124.202       | O17       |
| VAJSUW         | 125.065       | N1        | TEFKEV         | 124.615       | O4        | QOJYEV         | 124.2         | O6        |
| EMOTOQ         | 125.065       | O4        | YIMKEM         | 124.606       | O5B       | DASSIZ         | 124.187       | CI1       |
| QOCVIN         | 125.062       | O3        | CEXTAB         | 124.604       | O2        | YAJYEO         | 124.187       | O2        |
| QEJBIT         | 125.061       | N1        | LUPPEU         | 124.6         | O8        | AHOMOB01       | 124.186       | O3        |
| JEXQEJ         | 125.057       | O10       | VIBJIA         | 124.597       | O53       | VOGSIW         | 124.177       | O4        |
| NARKEA         | 125.047       | O3        | XIHBAR         | 124.597       | O1        | XIYGIV         | 124.165       | O7        |
| JEKXAC         | 125.03        | N3        | FAWLAS         | 124.596       | O20       | TIVJIT         | 124.142       | O22       |
| TAHFOY         | 125.022       | O5        | KAYPUW         | 124.593       | O12       | BTCBZN         | 124.134       | O1        |
| QECVIH         | 125.018       | O6        | UTEJUJ         | 124.592       | O5        | REYPIV         | 124.134       | O4        |
| KAMTID         | 125.011       | N5        | ACOCIF         | 124.582       | N2        | BUQZOD         | 124.131       | O2        |
| QIBNOE         | 124.126       | O5A       | HOWVAR         | 123.565       | O17       | TAHFEO         | 123.044       | O5        |
| NEHFUD         | 124.122       | O4G       | WIGTEP         | 123.528       | O1C       | QAHHEP         | 123.043       | O5        |
| ROYTIL         | 124.102       | O6        | NIBSAU         | 123.517       | N2A       | NIBRUN         | 123.008       | N2A       |
| LESGEZ         | 124.081       | O7        | HUMYOG         | 123.509       | O3        | KAPWUV         | 122.965       | O73       |
| JUYROM         | 124.078       | O5A       | WEXFIQ         | 123.509       | O3        | XOZKAY         | 122.943       | O6        |
| FUNPOW         | 124.071       | O2        | VUMVEH         | 123.508       | N3        | SIXJER         | 122.931       | O1        |
| LEWFAV         | 124.067       | O2        | FAYROM01       | 123.501       | N2        | LIRDAS         | 122.928       | N5        |
| DEZXIS         | 124.066       | O21       | ZONZAF         | 123.5         | O3        | SATHED         | 122.925       | O5A       |
| CEYSEF         | 124.061       | O7        | IRINUT         | 123.487       | N5        | NUVXOT         | 122.916       | O5        |
| YAFJAS         | 124.059       | O5A       | JEKXEG         | 123.48        | N5        | OFUQUD         | 122.9         | O4        |
| DEZXUE         | 124.057       | O28       | HUXDUC         | 123.477       | O8        | MABMEI         | 122.898       | O1        |
| ESAVEB         | 124.038       | O10       | WIRCUX         | 123.474       | O3        | VOGSIW         | 122.89        | O4        |
| PIHYAI         | 124.038       | O6        | LARQAA         | 123.461       | O8        | FAYROM         | 122.882       | N4        |
| ADOMAL         | 124.029       | O5        | EBUBEL         | 123.457       | O3        | XOLCEH         | 122.88        | O16       |
| MATKAX         | 124.02        | F14       | QAHVUS         | 123.442       | O4        | NEHDOV         | 122.838       | O4E       |
| QIBNOE01       | 124.003       | O4A       | CIMJOA         | 123.438       | O1        | QEXJAF         | 122.824       | O5        |
| UJAZAG         | 123.983       | O3        | NUCRIN01       | 123.437       | N1E       | MIQYER         | 122.817       | O5        |
| DEZXIS         | 123.982       | O28       | EYIPOS         | 123.43        | O2        | CISWAD         | 122.814       | O5        |
| FEDYEU         | 123.975       | O7        | MATKAX         | 123.414       | P2        | SATHIH         | 122.809       | O7C       |
| FUNPOW01       | 123.964       | O2        | MIKCER         | 123.412       | O13       | ITOBEB         | 122.807       | O2        |
| KAXHIE         | 123.957       | O5        | SIXJER         | 123.387       | O4        | DARNIV         | 122.805       | N3B       |
| FAQFAI         | 123.953       | O18       | HATCEN         | 123.378       | O3        | SASQIP         | 122.798       | O6A       |
| RASFID         | 123.95        | O3        | XIHBEV         | 123.375       | O1        | ACACZM01       | 122.791       | O5        |
| FEDYEU         | 123.932       | O10       | SIXJIV         | 123.373       | O4        | HUPDUR         | 122.764       | O2        |
| BOVHEB         | 123.92        | N8C       | UQEDIE         | 123.367       | O2D       | NOHFAU         | 122.742       | O4        |
| NEHFOX         | 123.912       | O4D       | FETJOE         | 123.356       | O2        | NIBSAU         | 122.729       | N3C       |
| QIBNOE02       | 123.893       | O2A       | NILWOW         | 123.35        | N1        | TOFSOW         | 122.723       | O11       |
| KAYPUW         | 123.878       | O11       | KALJIU         | 123.337       | N5        | CIVQEG         | 122.718       | O6        |
| VEHDER         | 123.874       | O4        | NEHFAJ         | 123.337       | O4F       | IHECAB         | 122.713       | N3C       |
| NEHFIR         | 123.842       | O4D       | SOQDAE         | 123.336       | O2        | IJEDOR         | 122.712       | O5        |
| VIGBAQ         | 123.84        | O5        | FIDFUU         | 123.335       | O10       | JIPWAK         | 122.705       | N1K       |
| XOMHIQ         | 123.83        | O3        | ECUQAV         | 123.308       | O3        | SASVIT         | 122.704       | O3        |
| NEHFEN         | 123.825       | O4E       | FETJOE01       | 123.306       | O5        | KASQUS         | 122.695       | O11       |



|                |               |           |                |               |           |                |               |           |
|----------------|---------------|-----------|----------------|---------------|-----------|----------------|---------------|-----------|
| FIKNIX         | 123.823       | O4        | TESNUC         | 123.281       | O5D       | FUFVIM01       | 122.694       | O2        |
| JESQAA         | 123.823       | O10       | XACGUD         | 123.274       | O2        | SATHUT         | 122.693       | O3A       |
| <b>Refcode</b> | <b>∟YZnLB</b> | <b>LB</b> | <b>Refcode</b> | <b>∟YZnLB</b> | <b>LB</b> | <b>Refcode</b> | <b>∟YZnLB</b> | <b>LB</b> |
| JESQAA01       | 123.823       | O10       | HAGJIK         | 123.261       | O6        | TAQTOV         | 122.691       | O1        |
| ICUNUS         | 123.777       | O8        | SATHON         | 123.246       | O1        | OFABIG         | 122.681       | O5B       |
| LOPGAA         | 123.747       | O2        | JOMGOK         | 123.221       | O5        | ACACZM         | 122.667       | O1        |
| MAKYUS         | 123.743       | O3        | WUSFAU         | 123.219       | N5        | POWDOV         | 122.663       | O2        |
| UJIRUB         | 123.739       | CI1       | CUTQOY         | 123.201       | O4        | EXOFAZ         | 122.634       | O2        |
| YACSIG         | 123.704       | N5        | IQIZUD         | 123.199       | O7B       | BEGZOE         | 122.602       | O5B       |
| XEYSOM         | 123.686       | O11       | YACSEC         | 123.193       | CI3       | UGOQIS         | 122.596       | O6A       |
| OXUWIQ         | 123.673       | O26       | MIHNOH         | 123.168       | O6        | VIRNUG01       | 122.575       | O4        |
| OXUHOH         | 123.64        | O26       | LUWTEC         | 123.149       | O4        | POLDOL         | 122.55        | O6A       |
| SISFOR         | 123.634       | O8B       | CITGIW         | 123.146       | S6        | GUCQIH         | 122.546       | O10       |
| RAQVIQ         | 123.604       | N4        | NEHDUB         | 123.11        | O4G       | JAIXOI         | 122.546       | O16       |
| HUMYOG         | 123.584       | O5        | ACACZM01       | 123.092       | O1        | VIRXAX         | 122.528       | O3        |
| OXUHOH01       | 123.584       | O26       | KAHBOO         | 123.054       | O2        | FAZCUH         | 122.514       | O10       |
| FEDYEU         | 123.577       | O15       | NIBRUN         | 123.049       | N1C       | WUFBUV         | 122.506       | O9        |
| XEGQIM         | 122.499       | O5        | PIBLAQ         | 121.947       | O3        | OGIHIY         | 121.245       | O2        |
| EBUBEL01       | 122.493       | O3        | NOHFAU         | 121.944       | O1        | XAKHUQ         | 121.24        | O2        |
| DARNOB         | 122.49        | N4B       | PIBLAQ01       | 121.942       | O1        | EQEROJ         | 121.197       | O4A       |
| MOPGAB         | 122.489       | N3G       | PENMAA         | 121.909       | N2N       | ESASUN         | 121.197       | O6        |
| EBOQEU         | 122.467       | O1        | PENMAA02       | 121.889       | N1N       | GOJHUJ         | 121.197       | O3C       |
| IGAWET         | 122.464       | O8        | IHEMUF         | 121.863       | O10       | OFUQUD         | 121.188       | O8        |
| RUPCIQ         | 122.452       | F11A      | TOFSOW         | 121.86        | O5        | RETBEZ         | 121.166       | O8        |
| MOSNEN         | 122.451       | O8        | QAHHIT         | 121.853       | O4        | FUFVIM         | 121.158       | O1        |
| YIMKEM         | 122.423       | O1B       | GEGJUZ         | 121.852       | O2        | TUDGUX         | 121.158       | O3        |
| ACACZM02       | 122.416       | O5        | WISZON         | 121.837       | O2        | YATDUV         | 121.151       | N3        |
| MORTOD         | 122.406       | N4        | QAHVUS         | 121.81        | O9        | ALOPAS01       | 121.071       | O6        |
| PASFUN         | 122.404       | O9        | DARPET         | 121.788       | N4B       | REYPIV02       | 121.055       | O4        |
| DOLVOP         | 122.401       | S1        | GUVSEW         | 121.769       | O4C       | WAWGOQ         | 121.045       | O8        |
| LUNKUD         | 122.396       | N4        | WIRLUH         | 121.757       | O3        | ALOPAS02       | 121.043       | O6        |
| QUQDEN         | 122.375       | N5        | VIRNUG         | 121.751       | O2        | YILWUM         | 121.027       | O3        |
| QUJCUV         | 122.374       | O9        | UWEDUW         | 121.742       | O20       | MIFKOF         | 121.026       | O3        |
| KAPWUV         | 122.373       | O69       | MAKSUN         | 121.741       | O5        | LECWOG         | 121.015       | O2        |
| TUFHAE         | 122.372       | O13       | DARNOB         | 121.737       | N3B       | LUGTAJ         | 120.992       | O2        |
| AEPYZN         | 122.347       | O5        | MIWJOU         | 121.733       | O6        | ULAJJO         | 120.983       | O1        |
| PENMOO         | 122.344       | N2N       | QOMFEF         | 121.731       | O47       | MIBSUM         | 120.963       | O6        |
| YACSEC         | 122.297       | O44       | UFOPEM         | 121.723       | S1        | RUGYIE         | 120.957       | O7        |
| AGUJOC         | 122.268       | O3        | CUTQOY         | 121.676       | O6        | QOTBAE         | 120.946       | N2K       |
| NAPFIV         | 122.263       | O2        | MUVVUW         | 121.668       | O8        | REYPIV01       | 120.909       | O4        |
| MOYTUR         | 122.226       | O9        | QUKRAS         | 121.657       | O2        | ILIZEJ         | 120.894       | N1A       |
| KIFNEV         | 122.222       | O1        | EMOQIH         | 121.651       | O16       | SIGLUP         | 120.853       | O2        |
| XAXZIG         | 122.216       | O12       | NIPWIT01       | 121.635       | O1        | TIWSEZ         | 120.852       | O2        |
| XUQZAK         | 122.198       | O2        | IGUDEV         | 121.622       | N4        | DARPAP         | 120.845       | N4B       |
| KEKXAB         | 122.167       | O5        | LARRUT01       | 121.589       | O4C       | LIRDAS         | 120.832       | O3        |
| PASFUN01       | 122.154       | O9        | ONOHUV         | 121.58        | O3        | HALGUZ         | 120.831       | O18       |
| HOPTUC         | 122.145       | O11A      | OBUMUU         | 121.578       | O18       | BICJEG         | 120.81        | O7        |
| CEVYIM         | 122.134       | O2        | XOXZUI         | 121.569       | N20       | IWEMUT         | 120.797       | N3A       |
| ZUTQIO         | 122.115       | O4        | LARRUT         | 121.566       | O1        | QARCET         | 120.77        | N20A      |
| NAPHOD         | 122.113       | O2        | FAWLAS         | 121.517       | O18       | WEXFIQ         | 120.745       | N3        |
| CEVYIM01       | 122.092       | O3        | NIPWIT         | 121.517       | O1        | DARNUH         | 120.725       | N4B       |
| MUZHAR         | 122.09        | O2E       | NETVUF         | 121.513       | N5        | LORYEX         | 120.674       | O3        |
| NEKXAG         | 122.045       | N7        | KUBVOU         | 121.51        | O3        | DARPET         | 120.669       | N3B       |
| FEBFAU         | 122.045       | O8        | LUMCED         | 121.503       | O5        | AGIWAQ         | 120.622       | O8B       |
| SIXJIV         | 122.037       | O1        | IFEYOH         | 121.478       | O29       | CAHHOM         | 120.619       | O8        |
| RIDWUX         | 122.029       | O18       | LARRUT02       | 121.458       | O5C       | QIPLAE         | 120.619       | O9        |
| NAHGUB         | 122.009       | N1B       | HUVJAL         | 121.447       | O6        | RAXNAH         | 120.58        | O8        |
| AXOTEP         | 122.007       | O5        | KUBVOU         | 121.423       | O1        | BECKEC         | 120.574       | O14       |
| NUCSOU         | 121.998       | O7        | DEKCEF         | 121.406       | O1C       | EWUYAY         | 120.561       | O6        |
| GEXDAS         | 121.99        | N2        | LUMCIH         | 121.403       | O10       | GUBQOM         | 120.503       | N2D       |

|                |               |           |                |               |           |                |               |           |
|----------------|---------------|-----------|----------------|---------------|-----------|----------------|---------------|-----------|
| RECKIX         | 121.985       | O4        | BUQROV         | 121.381       | N4F       | OHUQAJ         | 120.503       | O24       |
| PENMAA01       | 121.984       | N1N       | KEPGOF         | 121.36        | O5B       | POCCAN         | 120.497       | N4        |
| <b>Refcode</b> | <b>∟YZnLB</b> | <b>LB</b> | <b>Refcode</b> | <b>∟YZnLB</b> | <b>LB</b> | <b>Refcode</b> | <b>∟YZnLB</b> | <b>LB</b> |
| NAKTOM         | 121.984       | O5        | DARNIV         | 121.344       | N4B       | VAXVUL         | 120.497       | O1        |
| HOKQED         | 121.983       | O2        | MEFWON         | 121.31        | O4        | RICDIR         | 120.458       | N4D       |
| ONIWEO         | 121.975       | O4        | ALOPAS         | 121.274       | O6        | EWUXUR         | 120.45        | O8        |
| UWEDOQ         | 121.955       | O20       | WIRHUD         | 121.246       | O7        | YODDAZ         | 120.448       | N5        |
| HOQQEK         | 120.405       | O6A       | WALCET         | 119.561       | N2F       | ROVFEP         | 118.605       | O7        |
| WISZUT01       | 120.403       | O2        | OBUMUU         | 119.556       | O12       | BAVYON         | 118.603       | O4A       |
| KUPHEL         | 120.396       | N2        | ROKSUI         | 119.546       | O8        | ESIWEK         | 118.6         | O2B       |
| USATIS         | 120.391       | O5        | VEGMAX         | 119.499       | O11       | IGOPAW         | 118.594       | O1        |
| MUVVUW         | 120.377       | O5        | HURFEH         | 119.484       | O14       | PIBHUF         | 118.572       | O4        |
| FAVPEA         | 120.374       | O2        | OHALAL         | 119.473       | O3D       | XIWJUJ         | 118.563       | N4E       |
| XEYBEL         | 120.364       | N9        | JIWKOQ         | 119.465       | N18       | YUBFUX01       | 118.507       | N2D       |
| ASUBIZ         | 120.355       | O5        | ISENOK         | 119.456       | O7        | ZONSIG         | 118.503       | O8        |
| WEJYAP         | 120.353       | N2K       | WEBRAZ         | 119.45        | O8        | ROVFEP         | 118.496       | O19       |
| OWABOE         | 120.326       | O5        | TETXEX         | 119.403       | O10       | KOJQOP         | 118.489       | O7        |
| QOMFEF         | 120.324       | O50       | ACENIF         | 119.398       | O10J      | AQOHEU         | 118.477       | N2D       |
| ZAZKIU         | 120.317       | N7        | FEQVEE         | 119.397       | O2        | ROVFEP         | 118.391       | O6        |
| FEBFIC         | 120.302       | O1        | KUBVOU         | 119.396       | O7        | JIWKOQ         | 118.388       | N14       |
| HUDMOJ         | 120.264       | O12       | CAVRAU         | 119.39        | O8        | ROVFEP         | 118.367       | O10       |
| AJAPEH         | 120.24        | O4        | DEZJUR         | 119.35        | O34       | XASDAX         | 118.348       | O7        |
| YACSIG         | 120.237       | N6        | XIZGAO         | 119.313       | O1        | ROVFEP         | 118.329       | O14       |
| PUNQIZ         | 120.23        | O31       | PUNQEV         | 119.304       | O11A      | HAWWAE         | 118.304       | O1        |
| WISZUT         | 120.199       | O2        | OZUNEF         | 119.293       | O5C       | ROVFEP         | 118.218       | O18       |
| MUVVUW         | 120.194       | O2        | KEYLEG         | 119.266       | O13       | REGROO         | 118.214       | O8        |
| XIMWAS         | 120.182       | O1        | SUWCEU         | 119.213       | O2        | JOMGOK         | 118.183       | N20       |
| MUVVUW         | 120.175       | O11       | ZEFFEV         | 119.213       | O1A       | POLKIL         | 118.139       | O10       |
| LUTXUT         | 120.164       | O2        | DUYJOY         | 119.212       | O3        | RUPCIQ         | 118.131       | F22       |
| GULLOP         | 120.161       | N5D       | WOJJEK         | 119.197       | O3        | ROVFEP         | 118.104       | O11       |
| VEHDER         | 120.14        | O3        | DUGYUA         | 119.161       | N3D       | JEJIV          | 117.991       | N1        |
| PIJBAM         | 120.108       | O15       | REWFAB02       | 119.148       | O4        | QOMFEF         | 117.987       | O49       |
| ASIZAG         | 120.053       | O6        | HIXWAN         | 119.118       | O2        | KIPLUT         | 117.986       | N1C       |
| ICUBUE         | 120.041       | O2        | DARPAP         | 119.072       | N3B       | LADTAO         | 117.95        | O7A       |
| KIDTOH         | 120.039       | N1        | ZAZKIU         | 119.055       | N3        | EHAMEH         | 117.948       | O8        |
| TEDSAX         | 120.012       | O6        | XUQHOH         | 119.044       | O16       | KUBVOU         | 117.944       | O9        |
| HURFOR         | 120.006       | O10       | AGOTAS         | 118.977       | O5        | WEKLOP         | 117.877       | O3G       |
| VONMIU         | 120.004       | O5        | WIWBUA         | 118.948       | O6        | QAYWUM         | 117.854       | O3        |
| VAJXAI         | 119.979       | O4        | DARNUH         | 118.879       | N3B       | GLYZNS10       | 117.668       | O5        |
| WALBOC01       | 119.97        | N7F       | REWFAB         | 118.865       | O5        | JIWKOQ         | 117.636       | N23       |
| WALBOC         | 119.969       | N1F       | REWFAB01       | 118.843       | O5        | LAGROC         | 117.545       | O4        |
| GORJEE         | 119.941       | N10       | HURFUX         | 118.829       | O8        | UCECOU         | 117.373       | O5A       |
| KOKBAO         | 119.914       | O6        | XIZGAO         | 118.794       | O2        | FAXCUF         | 117.305       | O4        |
| NAHGUB         | 119.863       | O5        | XULFEQ         | 118.793       | O10       | RIFNUQ         | 117.225       | O7        |
| CABPAA         | 119.826       | O4        | AROGIA         | 118.789       | O5C       | LUGLII         | 117.195       | N4H       |
| VIQZAX         | 119.823       | O7        | AJAPEH         | 118.767       | O7        | XUQHOH         | 117.19        | O16       |
| BUYDAC         | 119.774       | N9B       | PUNQIZ         | 118.738       | O26       | NEYQUG         | 117.126       | N4A       |
| HEVCER         | 119.766       | O6        | QOMFEF         | 118.723       | O43       | BAQHEG         | 117.055       | O2        |
| KIGBIL         | 119.691       | O2A       | XUNWIM         | 118.683       | O6        | QALHET         | 116.885       | O14       |
| AYIFUL         | 119.676       | O3        | EQOVIP         | 118.672       | F1        | ZITMIB         | 116.833       | N3B       |
| VEGLUQ         | 119.674       | O11       | OGIHIY         | 118.666       | O5        | BUYDAC         | 116.814       | N1B       |
| GATVAZ         | 119.661       | O3        | QITRET         | 118.651       | O3G       | DOPNOO         | 116.742       | N12       |
| WALCIX         | 119.616       | N2F       | WALBOC02       | 118.645       | N2F       | JIXLUY         | 116.737       | N1        |
| TATPUC         | 119.606       | O1        | ROVFEP         | 118.645       | O15       | CEZVIO         | 116.733       | O7        |
| MOKZUJ         | 119.58        | O8        | KOQJIL         | 118.626       | O3        | PIBCEL         | 116.675       | N1A       |
| PUGXOE         | 119.569       | O8        | GACWUG         | 118.605       | O6        | HEJNAP         | 116.544       | O1        |
| BABXEL         | 116.539       | O6        | BACMOJ         | 113.611       | O6A       | ATOWIQ         | 114.34        | N2A       |
| WADZIL         | 116.534       | O6        | HOWQOA         | 113.432       | O21       | OMEBIS         | 114.237       | O5        |
| MULQOA         | 116.523       | O2        | MOPGAB         | 113.422       | N5D       | XAHKAW         | 114.161       | N13E      |
| AJOVUS         | 116.519       | O7        | ZUCHOX         | 113.404       | O6        | HEHVOI         | 114.051       | O7E       |

|                |               |           |                |               |           |                |               |           |
|----------------|---------------|-----------|----------------|---------------|-----------|----------------|---------------|-----------|
| NETYUI         | 116.482       | O3A       | EYEDIY         | 113.055       | N4A       | MOPGEF         | 114.038       | N2L       |
| CUMBUI         | 116.391       | O4A       | PAGSUP         | 112.911       | O4B       | PUNQEV         | 113.82        | O7A       |
| <b>Refcode</b> | <b>∠YZnLB</b> | <b>LB</b> | <b>Refcode</b> | <b>∠YZnLB</b> | <b>LB</b> | <b>Refcode</b> | <b>∠YZnLB</b> | <b>LB</b> |
| MOPGEF         | 116.334       | N1O       | AQOHAQ         | 112.666       | N2B       | GUXJER         | 115.28        | O3        |
| BICJEG         | 116.106       | O6        | MATKAX         | 112.664       | F8        | EKOZUB         | 115.268       | O5        |
| JAIPUI         | 116.1         | O4        | NUHBOI         | 112.519       | O3A       | EWESAC         | 115.267       | O5K       |
| NIYNUG         | 116.094       | O1A       | ESIWEK         | 112.169       | O1C       | XICDOC         | 115.171       | O3A       |
| HUXDUC         | 115.983       | O10       | NAMGAN         | 111.854       | O9F       | ZODGIL         | 115.144       | O5        |
| SASQUB         | 115.814       | O3A       | FEBFAU         | 111.621       | O1        | SASQOV         | 115.138       | O1C       |
| TATPUC         | 115.667       | O11       | PUNQIZ         | 111.071       | O7        | KUJCIE         | 115.105       | O2A       |
| MOPGAB         | 115.647       | N6G       | XEJKAB         | 110.646       | O2B       | ZENQIV         | 115.045       | N1C       |
| SAPNOO         | 115.638       | O2        | UGOQIS         | 110.613       | O9A       | ZOGNER         | 114.955       | N3        |
| QASYUH         | 115.616       | N1D       | AMOYIL         | 110.223       | O4        | SATHON         | 114.799       | O4        |
| PIJGUM         | 115.568       | O8        | CUQRUD         | 109.814       | N2G       | FUMYUI         | 114.738       | O17       |
| GUXJAN         | 115.529       | O2        | DOYRUF02       | 109.443       | O9        | HUPXUM         | 114.705       | O2        |
| KOHBEP         | 115.529       | O4        | PUNQIZ         | 109.176       | O16       | SATHIH         | 114.52        | O5        |
| PIJGUM         | 115.504       | O9        | DOYRUF         | 108.656       | O9        | FAPJIT         | 114.482       | O4A       |
| MIXLAI         | 115.445       | O1A       | RORSEY         | 108.315       | O1        | ETAPOG         | 114.426       | N5B       |
| SATHED         | 115.396       | O7C       | DOYRUF01       | 107.981       | O9        | RUGYIE         | 114.39        | O18       |
| ROMQAN         | 115.317       | O14       | COKBIQ         | 103.24        | O4D       | FAMFAC         | 115.285       | N2D       |
| SATHUT         | 115.309       | O2C       | USAHAZ         | 102.758       | O5F       | MOSJUC         | 100.973       | O3        |

**(b) Refcodes, ∠Y–Cd…LB angles and the interacting LB atoms for the cone correction of the CdY<sub>5</sub>…LB systems.**

| <b>Refcode</b> | <b>∠YCdLB</b> | <b>LB</b> | <b>Refcode</b> | <b>∠YCdLB</b> | <b>LB</b> | <b>Refcode</b> | <b>∠YCdLB</b> | <b>LB</b> |
|----------------|---------------|-----------|----------------|---------------|-----------|----------------|---------------|-----------|
| USECEC         | 180           | N3        | NAQGAR         | 175.998       | Cl3       | JOSZOJ         | 172.445       | O4B       |
| VUCSAN         | 180           | N1        | OHIMIC         | 175.873       | N4        | DIFDAZ         | 172.366       | N2A       |
| AJIQIU         | 180           | O3        | SOPNUH         | 175.805       | O7        | BUSPOX         | 172.344       | N11       |
| EGUHOD02       | 180           | O3        | KEVDAR01       | 175.697       | Cl1       | HOQBIA         | 172.289       | Cl3       |
| HUZGUF         | 180           | O3        | IFIDIL         | 175.668       | N4        | NASTEG         | 172.229       | O6        |
| IFEWUL         | 180           | O4        | EMUMII         | 175.632       | Cl1       | XETBAA         | 172.153       | O6        |
| JAVQIH01       | 180           | O3        | PUPVIG         | 175.076       | O14       | TIZDIQ         | 172.041       | Cl1       |
| OFKIB          | 180           | O3        | JUHMEG         | 174.988       | Cl2       | SOPNUH         | 171.931       | Cl1       |
| OVEJOR         | 180           | O3        | LIVKIM         | 174.799       | I2        | KITCIC         | 171.93        | N4        |
| RIWXAX         | 180           | O1        | WASCAX         | 174.778       | N4        | KITCIC01       | 171.93        | N4        |
| RIWXAX01       | 180           | O3        | EKEYID         | 174.639       | N4        | HADXOD         | 171.868       | N5        |
| IVUXEC         | 180           | Cl2       | ZASVIB         | 174.619       | N8        | KITCIC02       | 171.84        | N5        |
| COVVUG01       | 179.676       | Cl5       | ATOSIO         | 174.613       | Cl3       | KUVNUN         | 171.829       | O1        |
| ZEDLAX         | 179.575       | Cl2       | WASCEB         | 174.55        | N3        | HUKYAP         | 171.799       | O2        |
| COVVUG01       | 179.491       | Cl14      | MARKOH         | 174.55        | O2        | EMUMII         | 171.766       | O2        |
| KITCIC02       | 179.357       | N4        | EMUMII         | 174.444       | O4        | BEPZUS         | 171.731       | F1        |
| KEXWAM         | 179.296       | O3        | LEZQAL         | 174.34        | O1        | DUHCOZ         | 171.647       | N2        |
| ZASVAS         | 179.288       | O1        | EVATUQ01       | 174.135       | N1B       | OHIMIC         | 171.636       | N2        |
| HADXOD         | 179.241       | N4        | XORBAI         | 174.089       | O1        | AHILUA         | 171.624       | O1        |
| BAQDAC01       | 179.075       | Cl3       | GUCWUX         | 174.077       | O5        | PUPVIG         | 171.599       | Cl3       |
| COVVUG01       | 179.046       | Cl11      | QEMBIW         | 174.071       | I3        | XIDBIZ         | 171.582       | O11       |
| MEFHIO         | 178.92        | F5        | COVVUG01       | 174.062       | Cl1       | NAQGAR         | 171.428       | O18       |
| BAQDAC         | 178.851       | Cl4       | RALRIG         | 174.039       | N2A       | PUPVIG         | 171.358       | O2        |
| COVVUG01       | 178.695       | Cl8       | FAKNUC         | 173.925       | O8        | SOHSIR         | 171.337       | Cl3       |
| COVVUG03       | 178.674       | Cl3       | ZUMTOS         | 173.834       | O5        | PUPVIG         | 171.167       | Cl3       |
| ITAFAL         | 178.365       | I7        | PARKUQ         | 173.735       | O6B       | XETGUA         | 171.156       | N4        |
| UWANUE         | 178.31        | O5        | ODUPEZ         | 173.696       | F8        | PEYLEK         | 171.146       | N3        |
| PRATCE         | 177.943       | N1        | XORBAI         | 173.591       | O4        | NAQGAR         | 171.129       | Cl6       |
| ACUROF         | 177.837       | O4        | ITEHEW         | 173.579       | Cl2       | QATWIT         | 171.032       | O3        |
| KEXXAN         | 177.71        | O4        | BERXUV         | 173.53        | O11       | NAQGAR         | 170.77        | O25       |
| PUPVIG         | 177.462       | O10       | EFOPUK         | 173.439       | N4        | XEVSAT         | 170.768       | Cl2       |
| QEFLEW         | 177.458       | I2        | EGANOP         | 173.332       | N8        | ABUYIG         | 170.76        | N8        |
| MURXAY         | 177.42        | O5        | AGUTEC         | 173.302       | O4        | TEZKER         | 170.759       | O7        |

|                |               |           |                |               |           |                |               |           |
|----------------|---------------|-----------|----------------|---------------|-----------|----------------|---------------|-----------|
| NAQGAR         | 177.409       | O7        | CUNJAY         | 173.288       | CI1       | KUVNOH         | 170.736       | CI2       |
| DOKSUT         | 177.331       | N5        | EMUMII         | 173.216       | O4        | KALJAJ         | 170.722       | O6        |
| <b>Refcode</b> | <b>ZYCdLB</b> | <b>LB</b> | <b>Refcode</b> | <b>ZYCdLB</b> | <b>LB</b> | <b>Refcode</b> | <b>ZYCdLB</b> | <b>LB</b> |
| ZAYPUM         | 177.326       | I4        | IWAXOU         | 173.194       | O9        | GIXNIO         | 170.714       | N3        |
| ASAWAT         | 177.11        | N2        | ITEHEW         | 173.17        | CI2       | KEXXAN         | 170.705       | O8        |
| COVVUG01       | 177.024       | CI16      | INOXUE         | 173.055       | O3        | FOBLAK         | 170.649       | N3        |
| XOQZIN         | 176.889       | N3        | QAFQIZ         | 172.922       | N17       | QAGFEJ         | 170.624       | N6        |
| BOQQUU         | 176.811       | CI1       | ITEHEW         | 172.854       | CI1       | MAQYIO         | 170.551       | O6        |
| KITCIC         | 176.685       | N1        | CADRAC         | 172.788       | O7        | QEMBIW         | 170.528       | I5        |
| KITCIC01       | 176.685       | N1        | XETBAA         | 172.77        | O1        | KITCIC         | 170.523       | N2        |
| COVVUG02       | 176.425       | CI1       | AGUTEC         | 172.68        | N12       | KITCIC01       | 170.523       | N2        |
| SADXIG         | 176.368       | N1B       | BOCCOM         | 172.525       | I2A       | FOBLAK01       | 170.515       | N3        |
| PUPVIG         | 176.266       | CI2       | XEDRUT         | 172.516       | N4        | KITCIC02       | 170.45        | N2        |
| PUPVIG         | 176.227       | CI4       | FEHVOF         | 172.499       | O3        | PUPVIG         | 170.408       | O7        |
| OMOFON         | 176.011       | N4        | TUMGEP         | 172.497       | N3A       | HADXOD         | 170.38        | N2        |
| ABUYIG         | 170.356       | O3A       | ITEHEW         | 168.588       | O7        | ROXJEW         | 166.757       | N4        |
| KITCIC02       | 170.344       | N6        | QEPSIO         | 168.585       | O5        | BERXUV         | 166.667       | CI3       |
| SEBMAQ         | 170.341       | N2        | WUSCAR         | 168.549       | CI4       | RAYZIE         | 166.625       | N3        |
| RIRTIW         | 170.293       | N4        | FEHVOF         | 168.534       | O2        | UMAQIJ         | 166.56        | O1        |
| HADXOD         | 170.25        | N6        | BALQIS         | 168.495       | O4        | BAQLOW         | 166.559       | N6        |
| QEMBIW         | 170.114       | I4        | ZASVAS         | 168.487       | O8        | NOXTEC         | 166.532       | S1        |
| MAHVOJ         | 170.052       | CI1       | DEHPIR         | 168.445       | CI1       | DAMZEZ         | 166.526       | O10       |
| DUHCOZ         | 170.005       | S1        | PUPVIG         | 168.43        | CI3       | XIKXAR         | 166.517       | N3        |
| FOPSIN         | 169.955       | O2        | JUJSUC         | 168.418       | O1        | XEDRUT         | 166.517       | O1        |
| NAQGAR         | 169.927       | O3        | PUPVIG         | 168.343       | CI4       | NAQBUD         | 166.507       | O4        |
| TOFJEG         | 169.917       | N8        | XORBAI         | 168.298       | CI1       | SEBMAQ         | 166.498       | N3        |
| HADXOD         | 169.898       | N3        | TOFJEG         | 168.294       | N4        | ITEHEW         | 166.483       | O4        |
| PUPVIG         | 169.871       | O11       | HIFTEY         | 168.227       | O1        | KOHZIT         | 166.446       | N2        |
| TAJDOZ         | 169.866       | N3        | GICVIZ         | 168.145       | N5        | BUTWOD         | 166.356       | N3        |
| JAQRUO         | 169.864       | I1        | UNIYUM         | 168.04        | O1        | BAQLUC         | 166.336       | N3        |
| KITCIC         | 169.858       | N3        | GOCPAR         | 167.992       | O1C       | ZUDZAB         | 166.283       | S1        |
| KITCIC01       | 169.858       | N3        | ZULWIP         | 167.971       | CI1       | VONPIZ         | 166.251       | N3        |
| KITCIC02       | 169.858       | N3        | BUSPOX         | 167.952       | N14       | XETBAA         | 166.202       | CI4       |
| FEMFOV         | 169.719       | I2        | AKIWEY         | 167.93        | N3        | BUSSAK         | 166.194       | O4        |
| ENANUD         | 169.688       | O6A       | MARKOH         | 167.726       | CI3       | KEXXAN         | 166.177       | CI1       |
| SIZGIS         | 169.676       | N1        | CADRAC         | 167.68        | O3        | CEXYOU         | 166.145       | O2F       |
| RALRIG         | 169.639       | S1A       | FEMFAH         | 167.676       | O1        | FULVAL         | 166.064       | N2A       |
| NAQGAR         | 169.577       | O2        | HOQBIA         | 167.479       | CI2       | EKEYID         | 165.952       | N1        |
| DAHHAH         | 169.532       | O3        | PICQCD         | 167.443       | N2        | XOQZIN         | 165.925       | O3        |
| FOPSIN         | 169.486       | O1        | PEXBIF         | 167.398       | N3        | PUPVIG         | 165.804       | CI4       |
| VOGMIP         | 169.465       | O5        | WAHZOY         | 167.366       | O5        | JOSZOJ         | 165.796       | O5        |
| BERXUV         | 169.443       | CI1       | EYAQOK         | 167.306       | S5B       | VATHUW         | 165.648       | N4        |
| SAQFIC         | 169.399       | N4        | WASCEB         | 167.299       | I1        | EWODUP         | 165.647       | CI9       |
| KITCIC         | 169.24        | N6        | UXOLEA         | 167.296       | O5        | SOPNUH         | 165.552       | O5        |
| KITCIC01       | 169.24        | N6        | WAHZIS         | 167.29        | O3        | FULVAL         | 165.549       | O1A       |
| PUPVIG         | 169.189       | CI1       | WAKLAY         | 167.256       | N1        | BUSPOX         | 165.531       | O1        |
| SUFPOY         | 169.147       | S2        | TUMGEP         | 167.252       | N2A       | XIKXAR         | 165.421       | N6        |
| ITAFAL         | 169.129       | I2        | HABSAG         | 167.241       | O8        | XEDRON         | 165.396       | N3        |
| XOQZIN         | 169.049       | CI1       | ABUYIG         | 167.171       | O27       | DURXUK         | 165.394       | O1        |
| OMOFON         | 168.986       | N3        | ITEHEW         | 167.158       | N7        | BUQDEZ         | 165.382       | N3        |
| NAZVER         | 168.985       | O6A       | WOYPAD         | 167.139       | N3        | XETBAA         | 165.31        | CI3       |
| XIWJOD         | 168.984       | N1        | TAJDOZ         | 167.121       | N2        | IJAXIC         | 165.303       | O3A       |
| WACSAY         | 168.851       | S1        | XUVWIW         | 167.12        | N3        | FOXBOL         | 165.238       | N1        |
| EWODUP         | 168.849       | CI6       | CAGBAP         | 167.081       | O2        | IHEYAW         | 165.223       | N4        |
| MOKXER         | 168.834       | CI3       | NENJAS         | 167.056       | CI7       | TUBMIO         | 165.203       | I1        |
| PUPVIG         | 168.813       | O1        | YAQQOY         | 167.05        | O2        | MALZUY         | 165.188       | N5        |
| ISUDUY         | 168.788       | O6        | NAQGAR         | 167.005       | CI2       | KESFIZ         | 165.122       | O6        |
| ISUDIM         | 168.749       | O6        | EGANOP         | 166.997       | N6        | MOKXER         | 165.061       | CI6       |
| OWEZOG         | 168.745       | O1A       | ZUDZAB         | 166.985       | O4        | PUPVIG         | 164.953       | O15       |
| ITEHEW         | 168.679       | O7        | KESNAZ         | 166.928       | O6        | ZULWIP         | 164.922       | N5        |

|                |               |           |                |               |           |                |               |           |
|----------------|---------------|-----------|----------------|---------------|-----------|----------------|---------------|-----------|
| CADRAC         | 168.66        | CI2       | GIFHAH         | 166.907       | O1        | WIZSIH         | 164.916       | N1        |
| BERLAO         | 168.65        | I1        | BAQLUC01       | 166.872       | N9        | XORBAI         | 164.9         | CI3       |
| <b>Refcode</b> | <b>ZYCdLB</b> | <b>LB</b> | <b>Refcode</b> | <b>ZYCdLB</b> | <b>LB</b> | <b>Refcode</b> | <b>ZYCdLB</b> | <b>LB</b> |
| ZUDZAB         | 168.614       | O3        | BAQLOW01       | 166.834       | N3        | PUPVIG         | 164.886       | O4        |
| KOHZIT         | 168.595       | N1        | PUPVIG         | 166.768       | CI1       | XOVGUK         | 164.838       | CI1       |
| TUDQOZ         | 164.793       | O12F      | XIWJOD         | 162.632       | N4C       | NAQGAR         | 160.711       | O20       |
| NAQGAR         | 164.766       | CI5       | ITAFAL         | 162.621       | I9        | ZECCIW         | 160.698       | O1        |
| BERXUV         | 164.763       | O1        | WAPKEE         | 162.554       | I1        | GOCPAR         | 160.686       | O2A       |
| KOMVUG         | 164.762       | N1        | DUHJAR         | 162.447       | O4        | GIXNEJ         | 160.685       | O10       |
| LALSOI         | 164.682       | N3        | FOPFUM         | 162.416       | F4        | ITEHEW         | 160.637       | O3        |
| QIPQIT         | 164.613       | O3C       | SOPNUH         | 162.359       | O6        | SIZGIS         | 160.597       | O3B       |
| PUYOS          | 164.612       | N2        | LEZQAL         | 162.319       | N4        | JAMHOV         | 160.548       | N4        |
| ZUDZAB         | 164.593       | S4        | ULUDOV         | 162.305       | N2        | WAHZIS         | 160.463       | O4        |
| ZIQZEI         | 164.536       | N6D       | RALQAY         | 162.203       | O5        | LOFJUM         | 160.448       | S3        |
| SOPNUH         | 164.482       | O3        | MILXUD         | 162.13        | CI1       | UXOLEA         | 160.367       | O6        |
| WIRQAR         | 164.469       | CI4       | ITEHEW         | 162.112       | O10       | NAQBUD         | 160.267       | O5        |
| LAVWEK         | 164.39        | O3        | HECYUL         | 162.094       | O2        | WAHZOY         | 160.133       | O9        |
| DUHCOZ         | 164.263       | N2        | JAYFAU         | 162.062       | O4        | KESNAZ         | 160.116       | O7        |
| BERXUV         | 164.248       | O4        | YAWNOD         | 162.017       | O5        | DEHPIR         | 160.053       | O2        |
| UTOGIU         | 164.185       | CI1       | ZASVIB         | 162.009       | N1        | BENBIH         | 159.976       | O5B       |
| HUSPER         | 164.18        | N2        | ULILAE         | 162.008       | N7A       | LAVWEK         | 159.785       | O1        |
| BUSRIR         | 164.146       | N4        | TEGGAO         | 161.996       | S2        | JONWOB         | 159.776       | O1        |
| DIHGOU         | 164.114       | O3        | TEGGAO         | 161.989       | S2        | CADRAC         | 159.761       | CI1       |
| QEKHUJ         | 164.109       | N4        | NOLYIY         | 161.938       | CI1       | YACGEP         | 159.73        | S2        |
| FIGHEJ         | 164.032       | O1        | PUPVIG         | 161.918       | O13       | TAFTAY         | 159.719       | N3        |
| PYNOCD         | 163.908       | I1        | XEDSAA         | 161.879       | N5        | NUKSOC         | 159.683       | CI1       |
| WAPKEE         | 163.908       | I2        | LALQEW         | 161.825       | O3        | ORUJOC         | 159.681       | O1        |
| DEHPIR         | 163.895       | O1        | XEDRON         | 161.797       | N4        | VATHUW         | 159.635       | N5        |
| NAQGAR         | 163.844       | O21       | KIXXAU         | 161.781       | O2        | HIVMAB         | 159.626       | N2A       |
| MURXAY         | 163.832       | CI1       | CICBOI         | 161.696       | S1A       | ACUROF         | 159.601       | CI1       |
| LAPROM         | 163.784       | O4        | MIDYUT         | 161.667       | CI4B      | LEZPUE         | 159.587       | N3        |
| EYAQIE         | 163.779       | S5B       | QIXSEY         | 161.625       | N2        | YUNGEU         | 159.533       | I3        |
| FAMJUA         | 163.698       | N1        | NUKSOC         | 161.61        | O2        | HEWWAK         | 159.45        | O2        |
| PUPVIG         | 163.655       | O8        | LALSOI         | 161.604       | N4        | EQUHIH         | 159.369       | O1        |
| PUPVIG         | 163.649       | O12       | VONPIZ         | 161.58        | CI1       | EJEMOV         | 159.359       | N2A       |
| NAQGAR         | 163.613       | O10       | PUPVIG         | 161.579       | O5        | IJEBOO         | 159.318       | CI2       |
| BAQLUC01       | 163.578       | N5        | DEHPIR         | 161.527       | O4        | JOSZOJ         | 159.301       | O1        |
| ZILPUH         | 163.503       | N4A       | PUPVIG         | 161.51        | O6        | FIHVOL         | 159.26        | O5        |
| XOQZIN         | 163.494       | O2        | NAQGAR         | 161.49        | O11       | WIZSIH         | 159.248       | O2        |
| TESZOG         | 163.435       | CI5       | EQUHIH         | 161.483       | O1        | VATHUW         | 159.147       | N3        |
| KESNAZ         | 163.426       | O7        | GALLEM         | 161.472       | O8        | BANQIS         | 159.131       | O12       |
| WIZSIH         | 163.404       | N2        | YUBNAK         | 161.453       | S1        | JUJSUC         | 159.064       | S1        |
| XEVSAT         | 163.401       | CI1       | JADTIU         | 161.284       | N2        | YUNGEU         | 159.062       | I4        |
| ZAYPUM         | 163.325       | I2        | KEXXAN         | 161.239       | O5        | EHAZAP         | 159.058       | N2        |
| PUPVIG         | 163.273       | O9        | ULILAE         | 161.218       | O1        | NUKSOC         | 159.049       | O4        |
| KALJAJ         | 163.243       | CI1       | MIDYUT01       | 161.156       | CI8       | GICVAR         | 159.039       | O5        |
| MOKXER         | 163.123       | CI8       | BUYWEZ         | 161.079       | O2        | XORBAI         | 158.981       | O11       |
| ULARAB         | 163.087       | CI1       | ORUJOC         | 161.076       | S2        | JAQRUO         | 158.949       | N1        |
| JAYFAU         | 163.023       | O3        | MANBOV         | 161.074       | O11       | YAQQOY         | 158.881       | O7        |
| MAJZUU         | 163.008       | I1        | JAGLAF         | 161.054       | N2        | QAGQAU         | 158.82        | O1        |
| PELWIO         | 162.994       | O2        | JAGLAF         | 160.951       | S1        | ITAFAL         | 158.711       | I11       |
| XAQBAU         | 162.714       | N3B       | PUHWIA         | 160.93        | S3        | QEPSIO         | 158.642       | I2        |
| ABUYIG         | 162.714       | O31       | PUPVIG         | 160.829       | O14       | DAVQOI         | 158.606       | N2A       |
| POMNAH         | 162.679       | N2        | CYTPCD10       | 160.735       | O3B       | GEKPIY         | 158.567       | I1        |
| GIQPIG         | 158.564       | O1        | LAVFOF         | 156.99        | N1        | CDSUTU         | 155.231       | N2A       |
| ABUYIG         | 158.493       | O30       | ODUPEZ         | 156.971       | CI2       | ALULIF         | 155.1         | CI1       |
| PUPVIG         | 158.477       | O13       | LAPROM         | 156.96        | O2        | OMODOL         | 154.994       | N1        |
| RUDVIW         | 158.474       | S1        | QIFKEZ         | 156.927       | O6B       | XETBAA         | 154.986       | O2        |
| NIRWET         | 158.44        | O7        | ABUYIG         | 156.902       | O31       | WOCNAD         | 154.976       | O1        |
| SUYCAR         | 158.386       | N3        | AZAGAL         | 156.893       | O10       | SUGPOC         | 154.968       | O6        |

|                |               |           |                |               |           |                |               |           |
|----------------|---------------|-----------|----------------|---------------|-----------|----------------|---------------|-----------|
| AZAGEP         | 158.359       | O11       | XORBAI         | 156.856       | O8        | RUDVIW         | 154.862       | S2        |
| DODJIS         | 158.311       | O3A       | EMUMII         | 156.843       | O5        | POMNAH         | 154.759       | N3D       |
| <b>Refcode</b> | <b>ZYCdLB</b> | <b>LB</b> | <b>Refcode</b> | <b>ZYCdLB</b> | <b>LB</b> | <b>Refcode</b> | <b>ZYCdLB</b> | <b>LB</b> |
| BUSSAK         | 158.311       | S1        | DUHCOZ         | 156.839       | N3        | TOFJEG         | 154.722       | N7        |
| ULILAE         | 158.268       | O1A       | IFIDIL         | 156.799       | S1        | LAVFOF         | 154.671       | O2        |
| REXWIC         | 158.195       | O9        | ITEHEW         | 156.755       | O9        | SUYCAR         | 154.592       | N1        |
| ZASVIB         | 158.171       | N4        | POMNAH         | 156.579       | N2D       | ABUYIG         | 154.59        | O30       |
| BANQIS         | 158.155       | O11       | AZAGEP         | 156.573       | O10       | BUPKED         | 154.578       | O4        |
| IFAWIV         | 158.148       | S1        | ITEHEW         | 156.556       | O6        | LALSOI         | 154.545       | Se1       |
| VATHUW         | 158.07        | N4        | PUPVIG         | 156.511       | Cl2       | FOHFUF         | 154.529       | S1B       |
| XETBAA         | 158.03        | O7        | EYAQIE         | 156.456       | S4B       | BUSRIR         | 154.502       | N1        |
| WEHQOP         | 158.028       | N2        | YEHNII         | 156.445       | O2        | QEPSIO         | 154.451       | O3        |
| LAYVIR         | 157.96        | N2        | XOQZIN         | 156.425       | O4        | PUPVIG         | 154.354       | O12       |
| NEGWIF         | 157.928       | O5        | WOCNAD         | 156.369       | O2        | ASAWAT         | 154.323       | O3        |
| XETHAH         | 157.916       | I1        | QOWSUS         | 156.354       | I1        | TIGJID         | 154.209       | O1        |
| AZAGAL         | 157.886       | O11       | OQOFEG         | 156.247       | N2E       | NAQGAR         | 154.203       | N2        |
| MAJFEK         | 157.873       | S2        | MURXAY         | 156.156       | O6        | XAQBAU         | 154.202       | O19       |
| WEHQEF         | 157.753       | N3        | TAWSAN         | 156.137       | O1G       | GIXNIO         | 154.14        | N4B       |
| BEPZUS         | 157.74        | F2        | IJEBOO         | 156.106       | Cl1       | FOXBOL         | 154.068       | N4        |
| CADRAC         | 157.7         | O1        | NAQGAR         | 156.102       | O23       | QIVRAR         | 154.021       | N2        |
| GAJSIV         | 157.673       | O11       | DEHPIR         | 156.098       | O7        | QIVRAR02       | 153.976       | N5        |
| VISXAZ         | 157.654       | O3        | XETBAA         | 156.068       | O2        | FIGHEJ         | 153.966       | N5        |
| JAMHUB         | 157.62        | N4        | FAZYOV         | 156.061       | O4B       | CADRAC         | 153.94        | I1        |
| KOMVUG         | 157.603       | S1        | UVENIT         | 156.006       | O2A       | EGANOP         | 153.925       | O5        |
| IFAWIV         | 157.592       | N2        | RIRTIW         | 155.992       | N3        | HABSAG         | 153.91        | N10B      |
| NAQGAR         | 157.584       | O12       | AJOJOY         | 155.865       | Cl1       | JAVQIH01       | 153.84        | O7        |
| REZKUF         | 157.555       | N2        | IXADIU         | 155.774       | O6        | ENANUD         | 153.802       | O2G       |
| AZAGAL         | 157.54        | O9        | ROFQEK         | 155.619       | N1        | QIVRAR01       | 153.79        | N6A       |
| RAXTER         | 157.501       | O1        | DUPSUD         | 155.619       | O4        | BEPZUS         | 153.642       | N5        |
| AZAGEP         | 157.479       | O9        | WASCEB         | 155.616       | I2        | IWAXOU         | 153.629       | F4        |
| CELSMAH        | 157.457       | O8        | TUDQOZ         | 155.598       | N6        | AJIQIU         | 153.609       | O9A       |
| XEDSAA         | 157.406       | I2        | LEZQAL         | 155.585       | O2        | MURXAY         | 153.594       | O1A       |
| EQINUO         | 157.402       | N3        | BOQKEZ         | 155.571       | O6        | TOFJEG         | 153.593       | O7        |
| OJEQUR         | 157.392       | N1        | ZINPUJ         | 155.543       | N4        | IBEWIW         | 153.505       | N3        |
| HEWWAK         | 157.375       | N4        | SAQFIC         | 155.503       | N3        | ZUMTOS         | 153.479       | N2        |
| WIZSIH         | 157.332       | O1        | BOQQUU         | 155.496       | Cl2       | XAPQUC         | 153.398       | N2B       |
| JONWOB         | 157.291       | N1C       | BUSSAK         | 155.444       | S4        | YUBNAK         | 153.395       | Cl2B      |
| ITEHEW         | 157.283       | O9        | BENBIH         | 155.347       | O6A       | ITAFAL         | 153.377       | O1        |
| TIZDIQ         | 157.273       | F1        | NIBZEE         | 155.336       | O3        | RALRIG         | 153.376       | I3        |
| CEMBOO         | 157.268       | O1        | NUTYEH         | 155.331       | N1D       | QIVQUK02       | 153.363       | N2A       |
| HOQBLA         | 157.164       | O1        | AJOJOY         | 155.328       | Cl4       | RIWXAX01       | 153.35        | N5        |
| NAQGAR         | 157.162       | Cl1       | ECOWUR         | 155.316       | N3        | ORUJOC         | 153.341       | O1A       |
| COSVIR         | 157.137       | O51       | YIHNEK         | 155.308       | N1        | ZEGGOL         | 153.338       | O3        |
| IJEBOO         | 157.084       | Cl4       | CEBDAQ         | 155.289       | O4        | MIYHUY01       | 153.237       | N1        |
| DUPSUD         | 153.217       | O4        | XOQZIN         | 151.68        | O1        | TUBMIO         | 150.293       | N3        |
| ETUHAD         | 153.2         | N3        | LIVKIM         | 151.662       | I1        | BERXUV         | 150.266       | O3        |
| QIVQUK01       | 153.2         | N5        | KALJAJ         | 151.661       | O8        | CANHAC         | 150.233       | O6        |
| OFIKIB         | 153.13        | O1A       | BUYWUN10       | 151.59        | O1        | PEMGOG         | 150.165       | O1        |
| GIXNIO         | 153.12        | N2        | ALULIF         | 151.587       | Cl1       | XETBAA         | 150.064       | O3        |
| CEBDAQ         | 153.061       | O4        | XIWCOX         | 151.562       | N11       | FAZYOV         | 150.019       | O4E       |
| RIWXAX         | 153.042       | O2A       | KOMVUG         | 151.517       | Cl1       | GIXNEJ         | 149.99        | O11       |
| QIVREV02       | 153.024       | N5        | BAYMAQ         | 151.509       | S1        | LESROQ         | 149.965       | S4A       |
| PUPVIG         | 153.02        | O16       | ODUPUZ         | 151.481       | Cl2       | POMNAH         | 149.951       | N3        |
| ULUDOV         | 152.976       | S1        | IPAGUB         | 151.472       | S1        | MALZUY         | 149.869       | N4        |
| PUPVIG         | 152.956       | O10       | VIXNEX         | 151.434       | O1        | DIFYEZ         | 149.841       | N4        |
| PICQCD         | 152.955       | N3        | GAKMOV         | 151.394       | N2        | OQOFEG         | 149.678       | O3        |
| QIVQUK         | 152.94        | N6        | VATHUW         | 151.392       | N5        | OPOYOI         | 149.663       | N4        |
| VIDKOI         | 152.897       | S3        | UQUWEJ         | 151.343       | Cl1       | QAGFEJ         | 149.579       | N4        |
| QUKLUE         | 152.854       | S1        | BUYWUN10       | 151.341       | O3        | HIRLAV         | 149.554       | N2A       |
| XAKWUF         | 152.843       | I1        | BUSSAK         | 151.33        | S3        | JEZNUB         | 149.495       | S1        |

|                |               |           |                |               |           |                |               |           |
|----------------|---------------|-----------|----------------|---------------|-----------|----------------|---------------|-----------|
| QIVREV         | 152.731       | N6        | EYAQOK         | 151.274       | S3B       | PUPVIG         | 149.453       | O16       |
| NOLYIY         | 152.728       | O1        | CEXROO         | 151.253       | Cl1       | HIRLAV01       | 149.425       | N2A       |
| <b>Refcode</b> | <b>ZYCdLB</b> | <b>LB</b> | <b>Refcode</b> | <b>ZYCdLB</b> | <b>LB</b> | <b>Refcode</b> | <b>ZYCdLB</b> | <b>LB</b> |
| QIVREV01       | 152.723       | N5        | DEHPIR         | 151.22        | O3        | XORBAl         | 149.212       | O12       |
| PAPHIZ         | 152.713       | O6A       | XIWCOX         | 151.193       | N7        | SEBMAQ         | 149.189       | N1        |
| FIGHAF         | 152.691       | I2        | JITFAU         | 151.189       | I1        | OPOYOI         | 149.178       | O4        |
| NAQGAR         | 152.689       | O23       | WECSIJ         | 151.17        | N1A       | FIKJUF         | 149.177       | O14       |
| DUKLAZ         | 152.683       | O3C       | FOPFUM         | 151.135       | F5        | ZENHOS         | 149.171       | O1        |
| KEXXAN         | 152.562       | O6        | WEMBIB         | 151.123       | N1        | ZENHOS01       | 149.16        | O1        |
| EGUHODO2       | 152.546       | O2F       | CYTPCD10       | 151.091       | O2B       | GIFKUE         | 149.089       | O2        |
| BAQLow         | 152.506       | N5        | KEXXAN         | 151.073       | O2        | YATXEY01       | 149.055       | N6        |
| RISZAV         | 152.488       | O4        | XECCAK         | 151.029       | O10       | YATXEY         | 149.03        | N2        |
| XORBAl         | 152.446       | O5        | SOPNUH         | 151.019       | Cl1       | LAVWEK         | 149.002       | S1        |
| DAHhAX         | 152.443       | F3        | MIYHUY01       | 150.945       | N6        | PUPVIG         | 148.981       | O4        |
| IHEWIC         | 152.435       | O7        | BAQLUC01       | 150.915       | N6        | XETBAA         | 148.917       | O5        |
| VALMUU         | 152.281       | O3        | TAWSAN         | 150.904       | N1        | POJZUL         | 148.843       | Cl3       |
| NAQGAR         | 152.275       | Cl1       | PUPVIG         | 150.901       | Cl2       | GATZOR         | 148.832       | O12       |
| BAQLow01       | 152.267       | N4        | LALQEW         | 150.894       | O3        | MOYPEW         | 148.826       | O5        |
| NAQGAR         | 152.264       | O6        | BAQLUC01       | 150.856       | N10       | ULUDOV         | 148.817       | S2        |
| VONPIZ         | 152.263       | Cl1       | AFEDAS         | 150.854       | O2        | ZESVAW         | 148.767       | N6        |
| IFAWIV         | 152.251       | N3        | DINBIN         | 150.846       | O1        | TUDQOZ         | 148.724       | O13       |
| BUNMII         | 152.218       | O8        | MUGWOC         | 150.785       | N6        | ZEGGOL         | 148.706       | N5        |
| XEDSAA         | 152.147       | N3        | YAQQOY         | 150.736       | S1        | TAFTEC         | 148.69        | O4        |
| NAQGAR         | 152.144       | O4        | BUSPOX         | 150.679       | N10       | PELWIO         | 148.67        | N2        |
| NASTEG         | 152.075       | O5        | YATXEY01       | 150.674       | N4        | PUHWIA         | 148.62        | N4        |
| YIHNEK         | 152.073       | N3        | OPOYIC         | 150.635       | N4        | PAQVEJ         | 148.557       | S2A       |
| FOWLEJ         | 152.032       | N5        | MUXVOT         | 150.585       | O6        | UQUWEJ         | 148.526       | N4        |
| RILWAM         | 151.903       | I1        | KESFIZ         | 150.575       | O1        | GACYIV         | 148.479       | N2        |
| NIBZAA         | 151.883       | O3        | ROXJEW         | 150.558       | N3        | CICXIW         | 148.468       | O3        |
| KEXXAN         | 151.882       | O3        | YATXEY         | 150.505       | N4        | OSIVAQ         | 148.46        | O1        |
| OVEJOR         | 151.844       | O2A       | PEMGOG01       | 150.372       | O1        | XIBQUV         | 148.454       | N1        |
| BAQLUC         | 151.821       | N4        | OPOYIC         | 150.37        | O4        | ACUDOT         | 148.452       | N4        |
| PUPVIG         | 151.813       | O12       | ECEJON         | 150.325       | N4A       | GATZOR01       | 148.432       | O12       |
| XUYNEM         | 151.809       | O1        | XURNAC         | 150.314       | O4        | GALWAS         | 148.42        | O2        |
| OXIWEZ         | 148.265       | O5        | OPOYIC         | 146.324       | O1        | QAWHII         | 144.649       | N3        |
| FOWHOP         | 148.245       | N6        | GOXBAY         | 146.313       | N3B       | EQUHHI         | 144.6         | N4        |
| QATWIT         | 148.222       | O3        | AGUTEC         | 146.302       | O1        | ZASVIB         | 144.587       | N2        |
| ACUROF         | 148.213       | O6        | FIKJUF         | 146.292       | O14       | RALRIG         | 144.572       | N2        |
| ABUYIG         | 148.123       | O26       | EGANOP         | 146.281       | N9B       | ABUYIG         | 144.535       | O33       |
| GOXBAY         | 148.105       | Cl1B      | KITCIC         | 146.245       | O4        | XIBQUV         | 144.499       | N2        |
| UWANUE         | 147.987       | O5        | KITCIC01       | 146.245       | O4        | GATZOR01       | 144.499       | O5        |
| DUHJAR         | 147.967       | S2        | MOZFAJ         | 146.239       | O2        | GALLEM         | 144.467       | O8        |
| ZIMGOT         | 147.964       | O1        | NAQGAR         | 146.137       | O1        | XAGCEQ         | 144.418       | I1        |
| FAZYOv         | 147.877       | O3D       | IDIKIR         | 146.107       | S1        | SIZGIS         | 144.412       | O2F       |
| CADRAC         | 147.867       | O4        | WASCEB         | 146.101       | N4        | NAQBUD         | 144.403       | O1        |
| GEKPIY         | 147.847       | S1        | QELKIE         | 146.01        | N4        | XEVSA          | 144.395       | O1        |
| ROFQEK         | 147.844       | Cl1       | PUPVIG         | 145.902       | N1        | POMNAH         | 144.387       | Cl2D      |
| IJAXIC         | 147.624       | O4A       | XIRHAI01       | 145.881       | N3A       | FAKNUC         | 144.385       | O5        |
| TUDQOZ         | 147.599       | O16       | XIRHAI         | 145.839       | N3A       | FULVAL         | 144.384       | O4        |
| LOFJIA         | 147.463       | N3        | JOFMOH         | 145.745       | O2        | GATZOR         | 144.383       | O8        |
| XIKXAR         | 147.417       | N6        | UNIYUM         | 145.7         | N2        | DEHPIR         | 144.375       | O1        |
| FAZYOv         | 147.411       | O3D       | RABHUX         | 145.698       | O8        | GEMCIM         | 144.351       | S2        |
| VUCSAN         | 147.387       | N2        | EYAQOK         | 145.638       | S4B       | OVEJOR         | 144.255       | O1C       |
| BERXUV         | 147.384       | O9        | NUTYEH         | 145.623       | N3B       | WAHZIS         | 144.218       | O2        |
| FOPYUG         | 147.348       | N8        | URCLCD         | 145.617       | N1N       | WAHZOY         | 144.214       | O12       |
| PONYAU         | 147.326       | N11       | CICXIW         | 145.606       | N6        | FIKJOZ         | 144.174       | O14       |
| ACUROF         | 147.317       | O5        | TIGDUJ         | 145.555       | O4        | CYTPCD10       | 144.11        | O10       |
| RIPKAG         | 147.207       | O11       | LAJWOJ         | 145.54        | S1B       | DUPSUD         | 144.099       | O6        |
| ACUROF         | 147.175       | O1E       | PENPOR         | 145.539       | O10       | OFIKIB         | 144.098       | O2C       |
| ULUDOV         | 147.172       | S2        | FIKJUF         | 145.506       | O14       | EYAIQIE        | 144.066       | S3B       |

|                |               |           |                |               |           |                |               |           |
|----------------|---------------|-----------|----------------|---------------|-----------|----------------|---------------|-----------|
| OMODOL         | 147.166       | O1        | HADXOD         | 145.501       | O4        | PELWIO         | 144.05        | N1        |
| OWEZOG         | 147.124       | O19A      | BENBIH         | 145.454       | O4        | EBOJIQ         | 144.034       | O4        |
| <b>Refcode</b> | <b>ZYCdLB</b> | <b>LB</b> | <b>Refcode</b> | <b>ZYCdLB</b> | <b>LB</b> | <b>Refcode</b> | <b>ZYCdLB</b> | <b>LB</b> |
| FIKUUF         | 147.031       | O14       | GELMUI         | 145.438       | N3        | QELVAH         | 144.034       | CI1F      |
| BUSSAK         | 147.028       | N4        | HANBIK         | 145.41        | N4        | NENXOW         | 144.011       | O6B       |
| ROFQEK         | 146.875       | CI6       | KITCIC02       | 145.395       | O4        | MAJFEK         | 143.997       | N3        |
| BANQIS         | 146.822       | O10       | PRATCE         | 145.384       | S1        | REXWIC         | 143.983       | O9        |
| DUHCOZ         | 146.755       | N3        | CICXIW         | 145.354       | O1        | NIBZEE         | 143.979       | N4        |
| FOPFUM         | 146.738       | F3        | LOFJOG         | 145.291       | N3        | FIKJUF         | 143.913       | O14       |
| OBOLOI         | 146.732       | S1        | XORBAI         | 145.232       | O2        | GICVIZ         | 143.905       | O4B       |
| XETBAA         | 146.68        | O4        | LALTEY         | 145.219       | O2        | QAFQIZ         | 143.863       | N6        |
| ZASVIB         | 146.679       | N5        | NENXOW         | 145.178       | O10       | SIRJAH         | 143.796       | O8        |
| IXADIU         | 146.624       | O9        | ORUJOC         | 145.176       | N3        | MURXAY         | 143.748       | O3        |
| SOPNUH         | 146.615       | N2        | ENANUD         | 145.174       | O1A       | URCLCD         | 143.709       | N1N       |
| BUCZOP         | 146.605       | O1        | OMOFON         | 145.13        | O2        | SIRHUZ         | 143.613       | O7        |
| XEVSAT         | 146.581       | CI1       | NAQBUD         | 145.045       | O2        | BUSPOX         | 143.572       | O2        |
| PONYIC         | 146.572       | N4        | FIKJOZ         | 144.958       | O14       | MURXAY         | 143.567       | O9        |
| BOQSOQ         | 146.571       | O3A       | OPOYOI         | 144.915       | O1        | DIFYEZ         | 143.54        | N3        |
| BUPKED         | 146.461       | O3        | NAZVER         | 144.909       | N2B       | QATWIT         | 143.539       | N3        |
| XAGCAM         | 146.448       | O2        | LAVWEK         | 144.784       | O6        | PENPOR         | 143.528       | O5        |
| CADRAC         | 146.445       | O5        | EQUHIH         | 144.77        | N8        | YAWVUQ         | 143.509       | O15       |
| REXRUI         | 146.433       | O3C       | QAWHII         | 144.768       | N1        | FULVAL         | 143.5         | O3A       |
| QIPQIT         | 146.425       | O1A       | EBOJEM         | 144.68        | O5        | DUKLAZ         | 143.499       | O2        |
| BUSSAK         | 146.365       | S2        | AFEDAS         | 144.668       | O3        | RIPKAG         | 143.494       | O5        |
| YELTIV         | 143.476       | S1        | IBEBEB         | 141.558       | N4B       | EYEGOF         | 139.905       | S1        |
| SIRJOV         | 143.451       | O7        | EGUHOD02       | 141.558       | O1B       | GIFKUE         | 139.896       | N3        |
| NOLYIY         | 143.435       | N1        | JEPTAA         | 141.549       | N2        | FOQQUY         | 139.857       | N3        |
| CEYOU          | 143.429       | O1B       | KUVNOH         | 141.508       | O5        | SIRJEL         | 139.822       | O6        |
| YAQQOY         | 143.403       | O7        | AJIQIU         | 141.47        | O2C       | PUDFAW         | 139.813       | N3        |
| EMUMII         | 143.326       | O2        | EWODUP         | 141.467       | CI10      | BUTWOD         | 139.796       | O1        |
| IRUZIG         | 143.243       | O35       | XORBAI         | 141.383       | N2        | FIRWOU         | 139.79        | O4        |
| FIKJOZ         | 143.213       | O14       | BUPKED         | 141.368       | O5        | MOZFAJ         | 139.778       | CI1       |
| SIRJUB         | 143.193       | O9        | NAQGAR         | 141.356       | CI6       | QIVRAR         | 139.761       | N4        |
| PAPTIL         | 143.138       | O2        | FOBLAK         | 141.35        | N2        | WAHZOY         | 139.7         | O11       |
| GELMUI         | 143.004       | N6        | JOSZOJ         | 141.319       | O3B       | REXRUI         | 139.678       | O4A       |
| RUVHAS         | 142.958       | O2        | DINBIN         | 141.297       | O6        | SOPNUH         | 139.602       | O4        |
| AFEDAS         | 142.784       | O6        | VUCZOL         | 141.271       | O8        | WACSAY         | 139.59        | N3        |
| XORBAI         | 142.777       | O9        | RIWXAX01       | 141.259       | O2C       | NOLYIY         | 139.582       | N4        |
| GATZOR         | 142.772       | O4        | UWANUE         | 141.215       | CI1       | DINBIN         | 139.581       | O5        |
| ZEGGOL         | 142.765       | N3        | RIWXAX         | 141.205       | O3C       | CEYOU          | 139.519       | O2        |
| CADRAC         | 142.747       | O9        | WAKLAY         | 141.166       | O1        | QIVQUK02       | 139.416       | N4        |
| GATZOR         | 142.735       | O7        | KESFIZ         | 141.131       | O6        | WEMJOP         | 139.395       | O5        |
| CADRAC         | 142.717       | O6        | ORUJOC         | 141.016       | O2        | YOGTEW         | 139.379       | O9A       |
| GATZOR01       | 142.696       | O1        | IFIDIL         | 141.015       | S2        | RIWXAX         | 139.349       | O1        |
| GATZOR01       | 142.635       | O6        | URCLCD         | 141.008       | O1N       | NUTYEH         | 139.301       | N4D       |
| CEBDAQ         | 142.521       | O6        | FOBLAK01       | 140.919       | N2        | QIVRAR01       | 139.293       | N4        |
| POKMIM         | 142.489       | CI2       | IJAXIC         | 140.861       | O3        | FOBLAK         | 139.288       | N2        |
| UWANUE         | 142.477       | CI2       | QAVROW         | 140.801       | N4        | NENXOW         | 139.281       | O9B       |
| ISEKUN         | 142.476       | CI1       | INOXUE         | 140.757       | N2C       | BUTWOD         | 139.263       | N1        |
| URCLCD         | 142.41        | O2        | AGOYAA         | 140.754       | N1        | RIWXAX01       | 139.216       | O3        |
| DUPSUD         | 142.379       | O1        | XECCAK         | 140.649       | O14       | NIBZAA         | 139.173       | N2        |
| MAJFEK         | 142.35        | N2        | WAHZIS         | 140.623       | O12       | PUPVIG         | 139.135       | O6        |
| DIFDAZ         | 142.326       | N2        | WEMBIB         | 140.569       | N3        | FOBLAK01       | 139.132       | N1        |
| JAVQIH01       | 142.278       | O1C       | PELWIO         | 140.558       | O3        | YUQJUR01       | 139.124       | O1        |
| FOWLEJ         | 142.251       | N4        | LOFJUM         | 140.533       | O1C       | MURXAY         | 139.098       | O8        |
| NEGWIF         | 142.231       | I2        | FIRWOU         | 140.513       | O5        | UCEYEK         | 139.086       | N7        |
| ZUDZAB         | 142.137       | S2        | PUPVIG         | 140.5         | N19       | WEMBIB         | 139.073       | N1        |
| XUDWIE         | 142.07        | CI9       | JUJSUC         | 140.458       | N1        | PARKUQ         | 138.986       | N2        |
| LOFJUM         | 142.067       | O4B       | BUSPOX         | 140.446       | N9        | NUKSOC         | 138.982       | O1        |
| CADRAC         | 142.051       | CI1       | COPBOZ         | 140.368       | O3        | OVEJOR         | 138.946       | O3        |



|                |               |           |                |               |           |                |               |           |
|----------------|---------------|-----------|----------------|---------------|-----------|----------------|---------------|-----------|
| ITADUD         | 142.038       | I4        | MARKOH         | 140.347       | CI2       | EBOJEM         | 138.89        | O8        |
| HECYUL         | 142.022       | O6        | ZASVIB         | 140.332       | O1        | AFEDAS         | 138.881       | O4        |
| <b>Refcode</b> | <b>ZYCdLB</b> | <b>LB</b> | <b>Refcode</b> | <b>ZYCdLB</b> | <b>LB</b> | <b>Refcode</b> | <b>ZYCdLB</b> | <b>LB</b> |
| QATWIT         | 141.981       | N6        | CADRAC         | 140.316       | O8        | BUYWUN10       | 138.873       | N3        |
| TIZDOW         | 141.978       | O1        | WEMBIB         | 140.244       | N1        | QIVQUK01       | 138.835       | N4        |
| CEBDAQ         | 141.969       | O1        | FOBLAK01       | 140.215       | N2        | PUYSOS         | 138.79        | CI2       |
| CADRAC         | 141.894       | O8        | CADRAC         | 140.187       | N2        | VIYXEG         | 138.787       | O8        |
| PRATCE         | 141.85        | S2        | FOBLAK         | 140.127       | N1        | NOJQIM         | 138.779       | N1D       |
| IRUZIG         | 141.831       | O33       | QIVRAR02       | 140.122       | N4        | XIWCOX         | 138.741       | N16       |
| IXADIU         | 141.808       | O7        | VIYXEG         | 140.104       | O7        | SAGZEG         | 138.726       | O2        |
| ZUDZAB         | 141.803       | S3        | FOQQUY         | 140.076       | O1        | KITCIC         | 138.707       | N3        |
| CYTPCD10       | 141.757       | O4C       | PAPGAQ         | 140.027       | O6        | KITCIC01       | 138.707       | N3        |
| IZIFUT         | 141.705       | CI4       | JOSZOJ         | 139.948       | O2        | OMODOL         | 138.615       | N2        |
| EWODUP         | 141.594       | CI7       | KUCPUU         | 139.937       | O5        | QIVREV02       | 138.541       | N4        |
| QIVQUK         | 138.531       | N7        | NAQGAR         | 137.15        | O22       | JOSZOJ         | 135.283       | O2        |
| MOKXER         | 138.5         | CI6       | KEMYAG         | 137.089       | CI4       | HUVXON         | 135.265       | N3        |
| OFIKIB         | 138.492       | O3        | KEVDAR01       | 137.025       | N2        | FIRWOU         | 135.263       | O6        |
| EGUHOD02       | 138.362       | O3        | BAQQUH         | 137.016       | O6        | HUVXON         | 135.24        | N2        |
| IFEWUL         | 138.304       | O4        | TOFJEG         | 136.972       | N2        | BUNMII         | 135.195       | O7        |
| SUFPOY         | 138.296       | N2        | XIRHAI01       | 136.97        | CI2A      | CYTPCD10       | 135.187       | O4C       |
| BEQHAI         | 138.293       | O7F       | XIRHAI         | 136.94        | CI2A      | COVVUG01       | 135.16        | N1        |
| XOQZIN         | 138.29        | N1        | CIVQAC         | 136.793       | O4        | IRUZIG         | 135.134       | O31       |
| XEDRON         | 138.225       | N5        | BAHXAM         | 136.732       | S3        | LALSOI         | 135.036       | N4        |
| ZUMJUP         | 138.199       | O5        | INIBAL         | 136.719       | O4        | IYONUI         | 135.028       | N2        |
| LAVWEK         | 138.198       | CI1       | NIBZEE         | 136.614       | O3        | HAZGAR         | 135.019       | S1        |
| EDUMEW         | 138.188       | O1        | ICAJUT         | 136.612       | O2        | NIBZAA         | 134.972       | O3        |
| TOJWOF         | 138.175       | N4        | PAQFAQ         | 136.569       | N2        | PAQVEJ         | 134.97        | S1        |
| TAWSAN         | 138.105       | N2        | ISEKUN         | 136.51        | F1        | COVVUG01       | 134.859       | N4        |
| AFEDAS         | 138.098       | O7        | MOKXER         | 136.458       | CI3       | BAQDAC01       | 134.833       | N1        |
| QIVREV         | 138.056       | N7        | COVVUG01       | 136.453       | N5        | DUKLAZ         | 134.798       | O2A       |
| FEHVOF         | 138.008       | O2        | NAQGAR         | 136.383       | O24       | HUVXON         | 134.794       | N1        |
| NAQGAR         | 138           | O2        | KINGIZ         | 136.367       | O2B       | LAPROM         | 134.698       | O1        |
| AJIQIU         | 137.961       | O3        | CEBDAQ         | 136.354       | O5        | KALJAJ         | 134.651       | O10       |
| WEMJOP         | 137.942       | O4A       | GATZOR         | 136.314       | O3        | KALJAJ         | 134.457       | O4        |
| QIVREV01       | 137.924       | N4        | HABSAG         | 136.313       | O9        | COVVUG01       | 134.428       | N3        |
| KITCIC02       | 137.906       | N6        | SOPNUH         | 136.287       | O1        | ITEHEW         | 134.312       | N7        |
| NAQGAR         | 137.86        | O1        | GUCWUX         | 136.285       | O3        | COVVUG01       | 134.309       | N6        |
| KEXWAM         | 137.822       | O7        | GATZOR01       | 136.261       | O2        | ZEDLAX         | 134.259       | N1        |
| FOWLEJ         | 137.81        | O1        | RABHUX         | 136.214       | O7        | XEDRUT         | 134.095       | O1        |
| HADXOD         | 137.806       | N6        | CADRAC         | 136.199       | O5        | MUXVOT         | 134.01        | O5        |
| ROPCOO01       | 137.801       | S2        | FOBLAK         | 136.187       | N3        | UWEZUT         | 133.96        | O2        |
| ROPCOO         | 137.781       | S2        | PUYSOS         | 136.137       | S1        | ROPCOO         | 133.951       | N2        |
| DUKLAZ         | 137.773       | N1        | COVVUG01       | 136.135       | N5        | ROPCOO01       | 133.939       | N2        |
| LIQKUU         | 137.741       | O37       | COVVUG01       | 136.116       | N4        | VALMUU         | 133.838       | O4A       |
| EWAPIE         | 137.727       | F4        | COVVUG01       | 136.094       | N3        | WASCAX         | 133.756       | O2        |
| DEGUJ          | 137.67        | O3B       | LEZQAL         | 136.066       | N3        | SUFPOY         | 133.706       | N3        |
| XEDRUT         | 137.658       | N4        | ZEDLAX         | 136.045       | N1D       | QAFQIZ         | 133.693       | O21       |
| NOXJES         | 137.626       | O1        | COVVUG03       | 135.809       | N1        | GAJSIV         | 133.668       | O4        |
| COSVIR         | 137.619       | O50       | FAVHER         | 135.797       | O5        | YOGTEW         | 133.638       | O4A       |
| XIWCOX         | 137.561       | N4        | NAQBUD         | 135.711       | O3        | COVVUG03       | 133.593       | N1        |
| UYEWIF         | 137.516       | N2A       | FOBLAK01       | 135.688       | N3        | AGUTEC         | 133.469       | O2        |
| JAVQIH01       | 137.515       | O3        | ZULWIP         | 135.634       | N1        | QAVDUQ         | 133.427       | N2        |
| DUPSUD         | 137.488       | O5        | PUPVIG         | 135.623       | O7        | ZOCZIA         | 133.147       | S2        |
| QIRPUE         | 137.486       | O1A       | BUSPOX         | 135.62        | N12       | XUWWIW         | 133.137       | S4        |
| LALQEW         | 137.448       | O2        | XECCAK         | 135.61        | O11       | SOHSIR         | 133.121       | N1        |
| COVVUG01       | 137.392       | N2        | CADRAC         | 135.573       | O13       | FOHFUF         | 133.112       | O1        |
| UQUWEJ         | 137.319       | N6        | BAJNUZ         | 135.503       | O2        | TUDQOZ         | 133.029       | N8        |
| DACBUH         | 137.313       | O1B       | MAJFEK         | 135.449       | N6        | COVVUG01       | 132.994       | N2        |
| COVVUG02       | 137.271       | N1        | IXADIU         | 135.437       | O1        | PARKUQ         | 132.841       | O4C       |
| PUPVIG         | 137.236       | O21       | QAFQIZ         | 135.413       | O13       | OQOFEG         | 132.746       | O4A       |

|                |               |           |                |               |           |                |               |           |
|----------------|---------------|-----------|----------------|---------------|-----------|----------------|---------------|-----------|
| XIFTOZ         | 137.231       | S2A       | MOZFAJ         | 135.38        | C1        | BAQDAC         | 132.732       | N2        |
| DAHAX          | 137.229       | F4        | IRUZIG         | 135.331       | O35       | ORUJOC         | 132.731       | O1        |
| <b>Refcode</b> | <b>∟YCdLB</b> | <b>LB</b> | <b>Refcode</b> | <b>∟YCdLB</b> | <b>LB</b> | <b>Refcode</b> | <b>∟YCdLB</b> | <b>LB</b> |
| GOCPAR         | 137.151       | O4        | XIKXAR         | 135.324       | N3        | XORBAI         | 132.678       | O3        |
| EVATUQ         | 132.615       | S2A       | PARKUQ         | 129.788       | O3A       | RALQAY         | 126.511       | S4        |
| FEMBOR         | 132.528       | N4H       | KEVDAR01       | 129.78        | N2        | IFAWIV         | 126.227       | N5        |
| UFULOY         | 132.449       | N2B       | ATOSIO         | 129.771       | N2        | JUJSUC         | 126.221       | N1        |
| KITCIC         | 132.245       | N5        | KOMVUG         | 129.694       | N1        | WEZZUX         | 126.058       | O2        |
| KITCIC01       | 132.245       | N5        | CYTPCD10       | 129.662       | O9        | SIZGIS         | 125.96        | O6A       |
| NIBZAA         | 132.237       | N3        | EBOJIQ         | 129.594       | O3        | YEHNIJ         | 125.587       | O3        |
| COVVUG01       | 132.172       | N6        | PENPOR         | 129.537       | O11       | YAWVUQ         | 125.55        | O14       |
| ZILPUH         | 132.161       | O5A       | RISZAV         | 129.327       | O4        | HOKFUI         | 125.348       | O3        |
| QAGFEJ         | 132.155       | N5        | ULILAE         | 129.29        | N6        | ORUJOC         | 125.103       | O3        |
| BAQDAC         | 132.145       | N1        | BENBIH         | 129.185       | O3        | CADRAC         | 124.98        | O6        |
| PUYCOS         | 132.097       | N1B       | NAQGAR         | 129.069       | O12       | KEXWAM         | 124.877       | O2        |
| IXADIU         | 132.048       | O6        | GAPSIC         | 129.041       | N1        | IFAWER         | 124.817       | N5        |
| KITCIC02       | 132.026       | N1        | WESCOQ         | 128.993       | C14       | TUDQOZ         | 124.797       | N10       |
| HADXOD         | 131.974       | N1        | NAQBUD         | 128.973       | O3D       | MURXAY         | 124.663       | O6        |
| UNIYUM         | 131.963       | O1        | SUFPOY         | 128.963       | S2        | XECCAK         | 124.1         | O9        |
| XALNUW         | 131.905       | S2        | EWAPIE         | 128.962       | F2        | EBOJEM         | 124.029       | O6        |
| JOSZOJ         | 131.877       | O4        | XEDRUT         | 128.962       | N5        | BEYKIA         | 123.836       | O4        |
| COVVUG02       | 131.542       | N1        | IFELUB         | 128.916       | N3F       | UJOGEI         | 123.507       | O7A       |
| QETKUV         | 131.491       | C1        | FOTGOK         | 128.818       | O3B       | SOHSIR         | 123.407       | N1        |
| ATOSIO         | 131.475       | N1        | COVVUG01       | 128.816       | N1        | QAFQIZ         | 122.877       | O24       |
| BUYWEZ         | 131.473       | O3        | ESIFIX         | 128.794       | O2N       | FEMBOR         | 122.844       | O2J       |
| NAQGAR         | 131.44        | O1        | FAMCON         | 128.703       | O6        | BAYMAQ         | 122.829       | S2        |
| PRATCE         | 131.249       | N3        | AVEROJ         | 128.231       | N1E       | BAQDAC         | 122.811       | N1        |
| WAHZIS         | 131.213       | O1        | FUSSY          | 128.207       | N2        | BAQDAC         | 122.649       | N2        |
| UCEYEK         | 131.203       | N8        | WAHZIS         | 128.203       | O9        | VALMUU         | 122.042       | O1        |
| WAHZOY         | 131.175       | O3        | ABUYIG         | 128.058       | O20       | SIRJIP         | 121.762       | O10       |
| PRATCE         | 131.11        | N5        | WAHZOY         | 128.021       | O2        | PAQNUQ         | 121.58        | O12       |
| TICLAT         | 131.047       | N2        | RIPKAG         | 127.941       | O10       | NUTYEH         | 121.283       | N5C       |
| RABHUX         | 131.034       | C12       | EFOPUK         | 127.926       | N5        | PARKUQ         | 121.281       | O5        |
| BUYWUN10       | 130.954       | O2        | KITCIC         | 127.865       | N1        | MOZFAJ         | 121.254       | O1        |
| PONYAU         | 130.924       | N14       | KITCIC01       | 127.865       | N1        | PAQNUQ         | 121.192       | O8        |
| SIRJEL         | 130.703       | O7        | OJEQR          | 127.813       | S2        | QUKLUE         | 120.95        | O2        |
| BORBOB         | 130.665       | S3        | FAZYOV         | 127.63        | O3D       | GUCWUX         | 120.607       | O5        |
| FOWLEJ         | 130.617       | N5        | KITCIC02       | 127.629       | N4        | GATZOR01       | 120.068       | O12       |
| BENBIH         | 130.609       | O6        | RISZAV         | 127.544       | N1        | MOZFAJ         | 119.96        | O1        |
| FOQQUY         | 130.515       | O5        | DIFYEZ         | 127.536       | N3        | GICVIZ         | 119.905       | N4F       |
| GAPSIC         | 130.493       | O8        | HADXOD         | 127.503       | N4        | TUDQOZ         | 119.771       | N9B       |
| BENBIH         | 130.462       | O6        | XECCAK         | 127.359       | O8A       | XURNAC         | 119.73        | O1        |
| TAWSAN         | 130.416       | O2A       | PUPVIG         | 127.282       | O20       | TUDQOZ         | 119.641       | O11B      |
| XECCAK         | 130.372       | O13       | UNIYUM         | 127.179       | N1        | YACGIT         | 119.592       | N5        |
| ITAFAL         | 130.329       | I6        | RISZAV         | 127.149       | N1        | GATZOR         | 119.545       | O12       |
| XEDRON         | 130.282       | N4        | AVEROJ         | 127.053       | N2J       | YACGEP         | 119.194       | N5        |
| PAQVEJ         | 130.279       | N1        | MAJFEK         | 127.05        | C1B       | GALLEM         | 118.565       | O8        |
| FAVTUR         | 130.278       | S4        | NAQGAR         | 127.038       | O5        | WEZZUX         | 117.992       | O2        |
| XORBAI         | 130.25        | O6        | LAPROM         | 126.967       | O1        | RIWXAX01       | 117.628       | O2        |
| ESIFIX         | 130.236       | N4D       | ATOSIO         | 126.759       | N2        | SIZGIS         | 117.473       | N1        |
| HUVXON         | 130.235       | N2        | GOXBAY         | 126.606       | N6C       | IFELUB         | 117.446       | N4D       |
| ATOSIO         | 130.196       | N2        | BUCZOP         | 126.593       | O1        | XOPWUV         | 117.358       | S4B       |
| ATOSIO         | 130.035       | N1        | ATOSIO         | 126.521       | N1        | AJIQIU         | 116.656       | O2        |
| SUFPOY         | 116.187       | S3        | HIVMAB         | 158.394       | N2        | HEPBIN         | 146.352       | N2        |
| QAWHII         | 116.102       | N1        | ACUROF         | 114.879       | O7        | ABUYIG         | 113.004       | O21       |
| QAWHII         | 115.453       | N3        | HUSPIV         | 111.859       | N2        | FOTGUQ         | 111.661       | O1A       |
| INOXUE         | 112.945       | N3A       | PAQFAQ         | 109.162       | O2        | FAKNUC         | 108.586       | O2        |

**(c) Refcodes,  $\angle Y-Hg \cdots LB$  angles and the interacting LB atoms for the cone correction of the  $CdY_5 \cdots LB$  systems.**

| <i>Refcode</i> | $\angle YHgLB$ | LB   | <i>Refcode</i> | $\angle YHgLB$ | LB  | <i>Refcode</i> | $\angle YHgLB$ | LB   |
|----------------|----------------|------|----------------|----------------|-----|----------------|----------------|------|
| FAHVEP         | 180            | Cl3  | OQAKAT         | 174.037        | S1  | QAHMAO         | 169.826        | O1   |
| HEQYIP         | 180            | Cl1  | ISADEM         | 174.021        | N3  | UGUBUU         | 169.72         | O3   |
| HEQYIP         | 180            | Cl5  | TAMPIH         | 173.935        | O1A | NAYJIH         | 169.694        | N3   |
| CELCAY         | 180            | I1   | XIPCAB         | 173.84         | Cl3 | EMAWUN         | 169.583        | N4   |
| DEBMAY         | 180            | N1   | TAMPIH         | 173.824        | N1A | FOTNEJ         | 169.581        | I1   |
| NAQYOT         | 180            | N2   | DAZWOR         | 173.611        | O5  | YESRUJ01       | 169.568        | S8   |
| HUBMEY         | 179.448        | N1   | HIMDUF         | 173.6          | N4  | MIKZIS         | 169.539        | O6   |
| IZUQEB         | 178.843        | N3   | MUJXIY         | 173.43         | O8  | ATAWOJ         | 169.435        | Cl1  |
| QEZQOD         | 178.565        | I2   | IZUQOL         | 173.403        | N3  | YESRUJ         | 169.273        | S8   |
| QEZQIX         | 178.56         | I2   | VUWVUE         | 173.32         | Cl7 | SADFIP01       | 169.166        | O13  |
| PUVHEW         | 178.525        | O36  | TUWRIN         | 173.268        | S1A | BUTYOG         | 169.161        | N7B  |
| QUVZUE         | 178.394        | N2   | IZUQUR         | 173.224        | N3  | LELYEG03       | 169.111        | S9   |
| QUVXEM         | 177.964        | N2   | DAXGAN         | 173.203        | N3  | NEBCII         | 169.098        | S1   |
| WAHJIB         | 177.94         | I1   | MESWEM         | 173.172        | S1  | DUXXEC         | 169.053        | N3   |
| KUKDOM         | 177.607        | Cl2  | HULKUW         | 173.172        | Cl9 | HOSQAJ         | 169.014        | N1   |
| FOVDIF         | 177.429        | Cl2  | WIGNUW         | 173.159        | O21 | MIJNEY         | 168.957        | Cl3  |
| QEZNOA         | 177.343        | Cl1  | UTENIS         | 172.905        | Cl8 | LELYEG05       | 168.858        | S9   |
| ALIFOS         | 176.973        | Cl4  | UJECER         | 172.89         | N3  | QAHNIX         | 168.857        | S4   |
| FASZIK         | 176.86         | S2A  | DAZWOR         | 172.511        | Cl1 | NUMMOX         | 168.797        | O4   |
| HULKUW         | 176.765        | Cl6  | VUPWIN         | 172.5          | Cl3 | LELYEG04       | 168.735        | S9   |
| TUWREJ         | 176.63         | N4A  | ITAXEH         | 172.38         | O5  | VOMQAR         | 168.666        | N4B  |
| AYIMUR         | 176.369        | N6D  | FUBVOP         | 172.256        | I1  | WALNOQ         | 168.603        | N5A  |
| SAXDOK         | 176.254        | Cl1  | POPHIL         | 172.119        | N1  | FAQVEY         | 168.597        | Cl2  |
| AHIMAH         | 175.868        | O1   | VOVRIJ         | 171.886        | O2  | PUPQUN         | 168.481        | O1   |
| EXUGEL         | 175.793        | S2   | WAHJIB         | 171.854        | I2  | EJOXUY         | 168.344        | Cl1  |
| YOHSUJ         | 175.77         | O5   | VUPWIN         | 171.808        | O9  | OCIVIG         | 168.26         | N2   |
| VUPXAG         | 175.498        | Cl2  | ADOKAG         | 171.79         | Cl1 | IZUPOK         | 168.232        | N4   |
| DICMAE         | 175.431        | Cl1A | XOYHAW         | 171.493        | I1  | XIPCAB         | 168.107        | Cl1  |
| XELQOV         | 175.411        | Cl1  | DAXGOB         | 171.26         | N3  | WAHJEX         | 168.064        | N1   |
| UZEGOW         | 175.366        | O1   | LELYEG01       | 171.149        | S9  | UYUZIZ         | 167.981        | Cl1  |
| DAXGIV         | 175.147        | N3   | LELYEG         | 171.141        | S12 | JATVAB         | 167.915        | Cl1  |
| NENTAC         | 175.109        | O8   | GOGLUK         | 171.11         | N9  | IZUPUQ         | 167.894        | N8   |
| XANGAX         | 175.1          | I3   | AZUVID         | 171.082        | Cl2 | PAYRAL         | 167.876        | N4B  |
| MIKZUE         | 175.065        | O5   | HADJII         | 170.949        | O1B | BABXOV         | 167.827        | O4   |
| LABPUD         | 175.048        | O11  | VUPWIN         | 170.911        | O11 | UJECAN         | 167.73         | N3   |
| NABPOV         | 174.97         | O2   | GUVKUF         | 170.881        | N4A | RANBOB         | 167.657        | Cl1A |
| HUPKOU         | 174.944        | N11  | VUBKEI         | 170.818        | F5  | BIHZEZ         | 167.629        | Cl1  |
| CEGNAD         | 174.78         | Cl2  | UQAPOU         | 170.768        | S2  | CUSBY          | 167.59         | Cl3  |
| YIQPAQ         | 174.749        | Cl3  | RIXGUA         | 170.733        | Cl1 | EHIVUN         | 167.557        | Cl1  |
| VUPWIN         | 174.712        | Cl3  | LELYEG02       | 170.69         | S9  | MIJNEY         | 167.503        | Cl3  |
| QUMVIE         | 174.42         | Cl2  | RINXET         | 170.662        | Cl2 | RANBOB         | 167.42         | O7A  |
| DAXGER         | 174.371        | N1   | UQEQEP         | 170.428        | Cl4 | DAZWOR         | 167.289        | O3   |
| HULKUW         | 174.289        | Cl8  | TTHPHG         | 170.417        | O5  | UQEREO         | 167.287        | N1   |
| ITAXEH         | 174.277        | O3   | MIJNEY         | 170.343        | Cl1 | AVIYUB         | 167.231        | I2   |
| ISADEM         | 174.276        | Cl2  | LELYEG         | 170.329        | S10 | GUYZIL         | 167.196        | N8B  |
| RASGIC         | 174.196        | S4   | XEWKOA         | 170.218        | I2  | GIDRET         | 167.033        | Cl4A |
| QAHRIC         | 174.139        | Cl3  | BEDXER         | 170.133        | I1  | BUQDID         | 167.002        | N3   |
| ONOFAZ         | 174.118        | Cl2  | TTHPHG         | 170.016        | Cl2 | MODKAS         | 166.975        | O7   |
| VUYDEA         | 174.068        | Cl1  | UQEQEP         | 169.842        | Cl3 | MIKZUE         | 166.957        | O6   |
| REZWEZ         | 166.778        | Cl2  | RANBOB         | 163.616        | O6A | GOGLUK         | 160.036        | N8   |
| TRPHGA         | 166.768        | N2   | PUPQUN         | 163.43         | N9  | QAHNIX         | 160.021        | Cl1  |
| MOVFEK         | 166.178        | S2   | GUVKOZ         | 163.426        | S3  | YEVQOI         | 160.02         | N3   |
| RIHGUL         | 166.147        | Cl1  | CUSBIC         | 163.413        | I2  | EFIJEK         | 159.956        | Cl1  |
| HOSPOW         | 166.028        | I1   | FARPUJ         | 163.391        | S1A | AROVEJ         | 159.909        | O10  |
| BABXUB         | 166.024        | O6   | OCIVIG         | 163.374        | O4  | RUXBOD         | 159.891        | Cl1  |
| UWIGIR         | 166.014        | N7   | OHURAM         | 163.341        | O1  | HOSPUC         | 159.83         | N5   |

| <i>Refcode</i> | <i>∠YHgLB</i> | <i>LB</i> | <i>Refcode</i> | <i>∠YHgLB</i> | <i>LB</i> | <i>Refcode</i> | <i>∠YHgLB</i> | <i>LB</i> |
|----------------|---------------|-----------|----------------|---------------|-----------|----------------|---------------|-----------|
| VUWVIS         | 165.914       | CI1       | XUHG0X         | 163.321       | N4        | XANGAX         | 159.793       | I2        |
| DAVHEO         | 165.696       | O13       | CETYAC         | 163.312       | N7        | LACVAO         | 159.716       | CI1       |
| ANABOH         | 165.634       | O7        | ABIXAO         | 163.307       | O2        | XANBIX         | 159.621       | I2F       |
| FEJRIZ         | 165.584       | CI1B      | ISADEM         | 163.293       | N2        | HUBMEY         | 159.613       | I2        |
| UJABAK         | 165.502       | I3        | PEJYEI         | 163.29        | O2        | FEYDAP         | 159.601       | CI4       |
| IYAJAW         | 165.466       | N2        | ABIWUH         | 163.145       | O2        | HIYMIM         | 159.51        | I1        |
| NABPOV         | 165.452       | S1        | QAHRIC         | 163.087       | CI3B      | TIBNOK         | 159.506       | S3        |
| JIRMUT         | 165.322       | O7        | TRPHGA         | 162.925       | N3        | LAPKEW         | 159.504       | I2        |
| XOKPAR         | 165.294       | S3A       | PUPNUJ         | 162.903       | S10       | MODKAS         | 159.491       | O5        |
| NAQYOT         | 165.215       | N1        | DAVHEO         | 162.619       | O7        | UMETUC         | 159.491       | N18       |
| NEHQUM01       | 165.168       | CI7       | MIKZUE         | 162.616       | O4        | PUVHEW         | 159.451       | N4        |
| YACHEQ         | 165.153       | N5A       | HUPKOU         | 162.604       | O7        | XOPWAB         | 159.401       | N9B       |
| ZIXTEI01       | 165.109       | CI1       | HUPKOU         | 162.575       | O18       | ISADEM         | 159.377       | O1        |
| VUYDEA         | 165.079       | O1        | BEVDAJ         | 162.534       | CI1       | YEVRAV         | 159.256       | N3        |
| ZIXTEI         | 165.078       | CI2       | LABPUD         | 162.524       | O14       | PUKJAG         | 159.242       | S1        |
| FETHUI         | 164.862       | S1        | RIBNAR         | 162.351       | N12A      | LATXOV         | 159.212       | CI4       |
| SAYLAF         | 164.81        | CI6       | IZUPOK         | 162.348       | N8        | KEZBAT         | 159.179       | CI6       |
| DOVPUC         | 164.764       | N2        | TUWREJ         | 162.288       | N5A       | FOKSAC         | 159.162       | N3A       |
| LOWKEQ         | 164.723       | S1        | LEKSOL         | 162.191       | N2B       | YEXVUV         | 159.142       | O7        |
| SADFIP01       | 164.615       | O6        | KUJVOB         | 162.078       | CI2       | XEHWUE         | 159.128       | I1        |
| DIXPAD01       | 164.344       | CI2       | HUBMEY         | 162           | I1        | DAXFUG         | 159.078       | N6        |
| JAGMOU         | 164.342       | N1D       | TOXFIX         | 161.908       | N4        | FTFHGC10       | 159.077       | S2        |
| TUCPUF         | 164.315       | I3        | FODREX         | 161.869       | S1        | FTFHGC10       | 158.942       | S6A       |
| JAGLOT         | 164.296       | N5B       | HUKSUE         | 161.699       | N2        | HEKLUE         | 158.93        | O4        |
| CITGIX         | 164.129       | S1        | QAHMAO         | 161.69        | N6        | LEKSEB         | 158.817       | CI3       |
| UGUCAB         | 164.092       | O2        | KOYGOU         | 161.676       | N3        | KENZEK         | 158.799       | O4        |
| BUNVAK         | 164.082       | O3B       | JAGLIN         | 161.606       | N5B       | XEHWUE01       | 158.794       | I1        |
| NUDCAQ         | 164.039       | N1        | DAZWOR         | 161.521       | CI1       | XIYBUD         | 158.746       | N2        |
| NENTAC         | 164.025       | O4        | ARULII         | 161.296       | O1        | JAGMUA         | 158.727       | CI2       |
| WALNOQ         | 163.983       | N4A       | DAZWOR         | 161.247       | O4        | NALNEV         | 158.64        | O3        |
| KUJVOB         | 163.961       | CI4       | IZUPUQ         | 161.178       | N4        | GADLED         | 158.54        | O2        |
| NALNUL         | 163.924       | O6        | OGARUL         | 161.05        | S4        | AVONIK         | 158.443       | N2        |
| NINHUO         | 163.869       | S2        | HOSPUC         | 160.931       | N1        | VOBJOM         | 158.436       | S2B       |
| DAZWOR         | 163.851       | O5        | IFAWUH         | 160.93        | N2        | XIPVOI         | 158.41        | S1        |
| IGEMOX         | 163.842       | N1        | DUCBAG         | 160.852       | O26       | FTFHGC10       | 158.409       | CI5       |
| DOVPUC         | 163.825       | N2        | EHIAUW         | 160.717       | CI3       | LABPUD         | 158.401       | O22       |
| AROVEJ         | 163.719       | O9        | QAHNIX         | 160.682       | CI2       | RACYUS         | 158.386       | O6        |
| SIKPAF         | 163.717       | O6        | OHIBUF         | 160.542       | O9        | OSUZUZ         | 158.298       | O1B       |
| ANABUN         | 163.702       | O7        | MUJXIY         | 160.345       | O1        | ENORUV         | 158.276       | I1        |
| ABIWUH         | 163.681       | CI1       | QATYOB         | 160.28        | O6        | GEXMII         | 158.261       | N3        |
| IYAJEA         | 163.676       | N2        | DIXNUU         | 160.257       | N7        | IJOLIE         | 158.246       | O11       |
| ITAXEH         | 163.641       | O7        | FOWBID         | 160.077       | CI1B      | NEWLUZ         | 158.195       | N3        |
| FEYDAP         | 158.14        | CI2       | VUPWIN         | 155.671       | O3        | HABMIK         | 153.155       | I1        |
| XEMBAT         | 158.072       | F2        | PUVHEW         | 155.58        | O40       | AVONIK         | 153.149       | N3        |
| XETXED         | 157.994       | O3        | MUJXIY         | 155.478       | CI2       | IBUWEJ         | 153.12        | CI2       |
| DAXGIV         | 157.993       | N2        | DAZWOR         | 155.356       | O6        | SADFIP01       | 153.104       | CI2       |
| DIXPAD01       | 157.968       | CI3       | HOSPOW         | 155.351       | I2A       | AXOJAY         | 153.055       | O1        |
| POCGAQ         | 157.965       | N4        | UMETUC         | 155.173       | N17       | XETXED         | 152.99        | O1        |
| WIGNUW         | 157.86        | CI4       | IYANEE         | 155.171       | N3        | NEWMAG         | 152.911       | O2A       |
| MEPHUN         | 157.797       | S1        | DAXGIV         | 155.167       | O1        | UGUBII         | 152.893       | O11       |
| JAGLIN         | 157.796       | N3B       | TUWROT01       | 155.009       | N3B       | XIYCEO         | 152.869       | N3        |
| VUPWIN         | 157.767       | O4        | EFIJEK         | 155           | O1        | FECQAJ         | 152.864       | S2D       |
| DAXGOB         | 157.494       | N2        | TTHPHG         | 154.995       | O8        | OVEFIF         | 152.846       | CI2A      |
| OHIBUF         | 157.467       | N2        | UMETUC         | 154.923       | N16       | YEVREZ         | 152.843       | I2        |
| DAXGAN         | 157.399       | N2        | TAMPIH         | 154.92        | O3A       | JUVHIU         | 152.834       | N3        |
| ZOSDOD         | 157.277       | N4        | HIYMOS         | 154.701       | I2        | NABPOV         | 152.811       | O8        |
| PUVHEW         | 157.238       | N7        | COQFAQ         | 154.658       | N5        | QIXGUA         | 152.782       | N2        |
| VUBKEI         | 157.234       | F1        | FISCAL         | 154.562       | CI6       | SORNUL         | 152.768       | I6        |
| FETHUI         | 157.226       | O4        | BUTZEX         | 154.433       | I2D       | JAMJIR         | 152.733       | CI1A      |

| <i>Refcode</i> | $\angle$ YHgLB | LB   | <i>Refcode</i> | $\angle$ YHgLB | LB   | <i>Refcode</i> | $\angle$ YHgLB | LB   |
|----------------|----------------|------|----------------|----------------|------|----------------|----------------|------|
| DOMDIS10       | 157.226        | CI2  | VEJHOK         | 154.421        | CI2  | HOSQAJ         | 152.689        | N3   |
| OSUZUZ         | 157.191        | O2B  | ABUBEI         | 154.413        | O1   | ASABON         | 152.662        | F3   |
| BICMUV         | 157.115        | F1   | HIMDUF         | 154.407        | N5   | EXUGUB         | 152.609        | N3D  |
| JAGMUA         | 157.093        | CI1  | LATXOV         | 154.331        | CI3  | HEQYIP         | 152.592        | N1   |
| XUHGOX         | 157.081        | N3   | DAXGER         | 154.308        | N2   | VUPWIN         | 152.567        | O6   |
| ZOSDOD02       | 157.032        | N4   | TUDKIM         | 154.289        | O4   | DAXGIV         | 152.535        | N7   |
| YOHSUJ         | 157.02         | O2   | IBUWEJ         | 154.264        | CI4  | CESZIM         | 152.523        | N2   |
| OPUKAM         | 156.963        | S2   | COQFAQ         | 154.168        | S2   | EKEJAG         | 152.519        | O8   |
| DAVHEO         | 156.959        | O11  | ARISAX         | 154.152        | N1   | ZAJZIX         | 152.499        | I3   |
| HIRWIO         | 156.85         | CI1  | OCIVIG         | 154.1          | O3   | LATXOV         | 152.483        | CI1  |
| PEDTEX         | 156.795        | O8   | RIBNAR         | 154.082        | O19  | VAGYOT         | 152.472        | O14  |
| LAMLAO         | 156.736        | CI1  | DIJSY          | 154.024        | N2   | JOZBEF         | 152.376        | O3   |
| BUMHEA         | 156.621        | O2   | DAXGER         | 153.954        | O1   | HOSQAJ         | 152.37         | N2   |
| TAMPIH         | 156.563        | O2A  | IJIMAR         | 153.953        | O5A  | GUYZIL         | 152.281        | S2B  |
| LEKROK         | 156.53         | N3A  | EHMERIV        | 153.934        | I2   | HOSPUC         | 152.259        | N3   |
| POCGAQ         | 156.519        | O5   | PAQBER         | 153.933        | CI3  | PEDTEX         | 152.211        | O2   |
| NALNEV         | 156.471        | O1   | BABXOV         | 153.859        | O5   | HABMIK         | 152.211        | I3   |
| FOKSAC         | 156.462        | N3   | CUYGUZ         | 153.842        | O2   | FIMJUJ         | 152.203        | N5   |
| CUSBY          | 156.42         | CI2A | JAGLIN         | 153.841        | N2B  | SADFIP01       | 152.147        | CI4  |
| DUXXEC         | 156.395        | N2   | HOSPIQ         | 153.717        | I4   | LIVCIC         | 152.097        | O4   |
| CAZQUP         | 156.355        | N1B  | VUPWIN         | 153.677        | O8   | YOLMAO         | 152.091        | S1   |
| PUPQUN         | 156.321        | N10A | DAXGER         | 153.603        | N6   | GEXMOO         | 152.015        | N6   |
| DAXGAN         | 156.245        | O2   | UGUBUU         | 153.589        | O4   | KUSMAM         | 151.973        | CI4  |
| JAGLOT         | 156.234        | N3B  | MODKAS         | 153.563        | O8   | DAVHEO         | 151.961        | CI4  |
| NABPOV         | 156.181        | O1   | JAGLOT         | 153.546        | N2B  | XOPWAB         | 151.953        | S5B  |
| YEVQIC         | 156.013        | N3   | QAHMAO         | 153.412        | O2   | ABUBEI         | 151.937        | S1   |
| PIHJUM         | 155.886        | N2   | YOHSUJ         | 153.284        | O3   | KUSMAM01       | 151.833        | CI3  |
| NEHQUM01       | 155.875        | CI1  | XAHSUX         | 153.267        | N2   | POCFUJ         | 151.822        | O4   |
| PRMHGA         | 155.784        | O2   | HIRWIO         | 153.233        | CI2  | FADFAR         | 151.82         | Se1A |
| CEFLEG         | 155.763        | N1F  | WURCIY         | 153.232        | N3   | SADFIP01       | 151.736        | O5   |
| YACGUF         | 155.707        | S2   | MIKZUE         | 153.205        | O2   | LOWKEQ         | 151.729        | N4   |
| SOHRIS         | 155.68         | O2B  | HIMDOZ         | 153.183        | N6   | NECMEQ         | 151.645        | N2A  |
| XECVUY         | 151.628        | CI1  | JOTXOF         | 149.725        | CI3A | BUTYOG         | 148.156        | S1B  |
| VUPWIN         | 151.613        | CI1  | YOLMAO         | 149.651        | N6   | XAHTAE         | 148.057        | N3   |
| IFAWUH         | 151.598        | S1   | NUMMOX         | 149.568        | O5   | CURZUL         | 148.049        | S1   |
| DAXGOB         | 151.517        | O2   | PUFBUO         | 149.541        | S1   | CAMFIG         | 148.022        | F4   |
| RUQNAT         | 151.464        | CI2  | PUPQUN         | 149.499        | N8   | ERIMAU         | 147.973        | S1   |
| QATYOB         | 151.452        | O4   | MEPHUN         | 149.43         | N1   | RACYUS         | 147.973        | N7   |
| DIJSY          | 151.447        | S2   | MODKAS         | 149.392        | N2   | KUJVOB         | 147.936        | N4   |
| MEPHUN         | 151.443        | S1   | LABPUD         | 149.334        | O18  | UJECER         | 147.864        | CI1  |
| RETJAB         | 151.437        | O12  | HAVCEO         | 149.328        | CI7  | CUSBIC         | 147.832        | O1   |
| IZUQOL         | 151.415        | N4   | LEKROK         | 149.166        | N4A  | NUMMOX         | 147.8          | O4   |
| OQAKAT         | 151.268        | S4   | RETJAB         | 149.16         | O11  | DUCBAG         | 147.78         | O21  |
| ZAZVIH         | 151.24         | N6   | POYYUY         | 149.144        | O9   | NEBCEE         | 147.556        | S2   |
| DAVHEO         | 151.053        | CI3  | VUGHEK         | 149.132        | F6   | HUBMEY         | 147.538        | N3   |
| IZUQUR         | 151.05         | N4   | AYIMUR         | 149.128        | N5D  | EJOPEZ         | 147.531        | CI1  |
| BABXUB         | 151.037        | N2   | SORNUL         | 149.035        | I2A  | LOLFIC         | 147.524        | S1   |
| ABUBEI         | 150.99         | S1   | IZUPUQ         | 149.004        | N3   | YEXNUK         | 147.505        | CI3  |
| SADFIP         | 150.985        | O1   | HUPKOU         | 148.973        | O15  | QATYOB         | 147.394        | CI1  |
| BIHZEZ         | 150.956        | O2   | NAQYOT         | 148.966        | N1   | DAXGER         | 147.311        | O2   |
| AGAJEB         | 150.921        | O51  | LABPUD         | 148.956        | O22  | HAVCIS         | 147.283        | O1   |
| KIZSAR         | 150.904        | I2   | NUMMOX         | 148.956        | N1   | ICEFAX         | 147.275        | F3   |
| CUSBY          | 150.891        | O1   | NUMMOX         | 148.917        | O2C  | EXUGEL         | 147.223        | N3A  |
| BUTYOG         | 150.721        | N5   | ACOMOX         | 148.89         | N1   | JUVHIU         | 147.193        | N4   |
| GAVBOV         | 150.704        | CI2A | SADFIP01       | 148.879        | CI3  | XEMBAT         | 147.127        | F11  |
| GUVKOZ         | 150.695        | N3   | EXUGIP         | 148.875        | N3A  | TAPJUS         | 147.016        | I4   |
| COQFAQ         | 150.672        | O8   | NUDCAQ         | 148.845        | O10  | SADFIP01       | 146.959        | O4   |
| SADFIP01       | 150.634        | O3   | RETJAB         | 148.784        | O11  | UMETUC         | 146.958        | N17  |
| MIVJEG         | 150.566        | S2   | ULAMEA         | 148.783        | O2B  | OGARUL         | 146.937        | S3   |

| <i>Refcode</i> | <i>∠YHgLB</i> | <i>LB</i> | <i>Refcode</i> | <i>∠YHgLB</i> | <i>LB</i> | <i>Refcode</i> | <i>∠YHgLB</i> | <i>LB</i> |
|----------------|---------------|-----------|----------------|---------------|-----------|----------------|---------------|-----------|
| XIYCEO         | 150.519       | O5        | UXUYAP         | 148.752       | O1C       | IZUQAX         | 146.906       | N7        |
| VUPWIN         | 150.511       | CI2       | UGUBII         | 148.713       | O13       | QEPXAK         | 146.9         | N1        |
| NODWUB         | 150.497       | N1        | AXOJAY         | 148.695       | O5        | POYYUY         | 146.858       | O6        |
| TAPJUS         | 150.31        | I2        | EWAWEG         | 148.689       | CI1       | IJILUK         | 146.851       | O7A       |
| EMAWUN         | 150.305       | N6        | XANFOK         | 148.678       | CI1       | DAVHEO         | 146.811       | CI2       |
| PUPQUN         | 150.199       | O2        | FETHUI         | 148.646       | O1        | BICMUV         | 146.706       | F10       |
| PAYRAL         | 150.091       | CI3B      | WIGNUW         | 148.614       | O20       | IZUQEB         | 146.699       | N4        |
| COQFAQ         | 150.091       | N11       | WALNOQ         | 148.583       | N3A       | LEKROK         | 146.657       | N7        |
| XAHSUX         | 150.052       | N3        | MUJXIY         | 148.573       | O7        | QATYAN         | 146.622       | O1        |
| HOSPUC         | 150.026       | N6        | VIXLIA         | 148.538       | N1        | HOYMAL         | 146.549       | I1        |
| RETJAB         | 150.019       | O12       | RANBOB         | 148.533       | O5A       | ITAXEH         | 146.509       | O2        |
| UXUYAP         | 149.999       | O2A       | CURZUL         | 148.526       | S2        | AFAPOP         | 146.428       | CI4       |
| EWAWEG         | 149.956       | N1        | DIYVEM         | 148.462       | S2        | AWOYAN         | 146.392       | O9        |
| LEFCAE         | 149.908       | As1       | RINXET         | 148.433       | O2        | TAPKIH         | 146.328       | I2B       |
| ZEDDUJ         | 149.897       | N3        | SADFIPO1       | 148.411       | O11       | RIBNAR         | 146.191       | N14       |
| UGUBII         | 149.825       | O9        | NIYDAA         | 148.353       | CI1       | BUTYOG         | 146.168       | N8        |
| IZUPOK         | 149.817       | N7        | VUBKEI         | 148.333       | F3        | ABUBEI         | 146.151       | S2        |
| ZAZVIH         | 149.789       | S1        | CUSBAU         | 148.277       | O1        | QIXGUA         | 146.142       | N4A       |
| OHURAM         | 149.782       | O1        | AGAJUR         | 148.257       | O43       | PAYRAL         | 146.111       | N4        |
| BUTYOG         | 149.769       | S3B       | LEKROK         | 148.216       | N6        | KENZEK         | 146.103       | O4        |
| XAHTAE         | 149.736       | N2        | XOPWAB         | 148.186       | S6        | DAVHEO         | 146.098       | O2        |
| FOVDIF         | 149.731       | N4        | NALNUL         | 148.163       | N8        | QEGQOJ         | 146.062       | O25       |
| CITHUJ         | 145.966       | S2A       | MODKAS         | 144.444       | O6        | OZOBIQ         | 142.856       | I1        |
| UXUXAO         | 145.948       | O1C       | QEGQOJ         | 144.377       | O36       | DAXGAN         | 142.851       | O3        |
| CAMFOM         | 145.918       | F14       | AFAPOP         | 144.309       | O1        | BUBKUH         | 142.747       | N1        |
| MIKZIS         | 145.891       | CI1       | ABUBEI         | 144.296       | O3        | LEKROK         | 142.694       | N8        |
| LATXOV         | 145.867       | CI2       | IJILUK         | 144.252       | N2A       | KUJYIA         | 142.631       | CI8       |
| HOSPUC         | 145.849       | I2        | WURCIY         | 144.236       | S3        | MUJXIY         | 142.629       | O6        |
| AGAJEB         | 145.838       | O51       | UQEREO         | 144.222       | N3        | OYILUF         | 142.603       | O1        |
| XEMBAT         | 145.829       | P2        | DUXXEC         | 144.22        | N3        | MODKAS         | 142.592       | O3        |
| GOGLUK         | 145.787       | N12       | NALNEV         | 144.165       | N7        | IJILY          | 142.557       | O5A       |
| WIGNUW         | 145.763       | O19       | YEXVUV         | 144.164       | O6        | BICMUV         | 142.535       | F3        |
| PEJYIM         | 145.75        | O9        | NINHUO         | 144.153       | S1        | CAMFOM         | 142.529       | F11       |
| IJIMEV         | 145.708       | O4A       | VEZVED         | 144.112       | O16       | BIXCUG01       | 142.505       | O7A       |
| VEZVED         | 145.679       | O7        | RINXET         | 144.098       | O2        | KIMFOB         | 142.503       | O5        |
| REZDAF         | 145.663       | CI10      | PIXWAV         | 144.098       | N2        | BABXOV         | 142.425       | O3        |
| AGAJEB         | 145.644       | O50       | NALNEV         | 144.074       | O4        | KUSMAM01       | 142.412       | CI4       |
| YUMBEP         | 145.609       | O6        | FISCAL         | 144.069       | CI2       | TAPKIH         | 142.382       | I1B       |
| JIRMUT         | 145.599       | N6        | IZUQAX         | 144.066       | N3        | DAVHEO         | 142.328       | CI1       |
| GOGLUK         | 145.572       | N12       | IJILY          | 144.029       | N2A       | MOVFEK         | 142.3         | N3A       |
| DEBWIR         | 145.533       | I3        | MUJXIY         | 143.991       | CI2       | BIXCUG01       | 142.296       | O6A       |
| GIZVIV         | 145.522       | N11       | SADFIPO1       | 143.9         | CI1       | NALNEV         | 142.261       | S1        |
| NALNEV         | 145.508       | N3        | FETHUI         | 143.874       | O4B       | KUSMAM         | 142.197       | CI2       |
| OWOHUF         | 145.49        | S3B       | UGUBII         | 143.821       | O5        | IJIMAR         | 142.181       | O7A       |
| SAYLAF         | 145.459       | N6        | JIRMUT         | 143.761       | O8        | YAZQEZ         | 142.144       | O4        |
| IJIPOI         | 145.405       | O7A       | XEMBAT         | 143.665       | F5        | JOZBEF         | 142.139       | S1        |
| KARROL         | 145.302       | N2A       | IJIMAR         | 143.526       | O6A       | FISCAL         | 142.135       | N2        |
| EWAWEG         | 145.222       | N2C       | AXOJAY         | 143.475       | CI1       | MIKZUE         | 142.123       | O1        |
| XUBZEB         | 145.163       | CI3       | TUDKIM         | 143.466       | O3        | MIKZIS         | 142.089       | O5        |
| YIQPAQ         | 145.159       | CI3       | HULKUW         | 143.444       | N6        | QATYOB         | 142.065       | O5        |
| DAXGAN         | 145.154       | O1        | AFETAI         | 143.442       | CI1       | QATYAN         | 142.052       | O3        |
| TUCPUF         | 145.154       | I3        | QAHNIX         | 143.442       | I2        | BIXCUG         | 142.018       | O6A       |
| IJILUK         | 145.073       | O6A       | PAQBER         | 143.405       | N1        | PYOHGP         | 141.963       | O5        |
| SADFIPO1       | 145.055       | O12       | VEZVED         | 143.274       | O10       | BELNIR         | 141.954       | F4        |
| JIRMUT         | 144.968       | N4        | PUPQUN         | 143.267       | N7A       | DEBWIR         | 141.954       | I4        |
| ULAMEA         | 144.94        | N3B       | BUBKUH         | 143.264       | CI2       | IJILY          | 141.91        | O6A       |
| ZEDDUJ         | 144.929       | O1        | CURZUL         | 143.25        | N10       | IYAJAW         | 141.88        | N1        |
| DAXZUA         | 144.907       | N5        | MIGHAN         | 143.23        | CI2       | XEMBAT         | 141.877       | F8        |
| OHIBUF         | 144.903       | N1        | DAXGOB         | 143.161       | O1        | ICEFAX         | 141.862       | F1        |

| <i>Refcode</i> | <i>∠YHgLB</i> | <i>LB</i> | <i>Refcode</i> | <i>∠YHgLB</i> | <i>LB</i> | <i>Refcode</i> | <i>∠YHgLB</i> | <i>LB</i> |
|----------------|---------------|-----------|----------------|---------------|-----------|----------------|---------------|-----------|
| QAHMAO         | 144.897       | O3        | PAQBER         | 143.146       | O5        | HULKUW         | 141.835       | N6        |
| SADFIP         | 144.89        | O2        | KIMFOB         | 143.125       | O1        | BIHZEZ         | 141.798       | O2        |
| QATYOB         | 144.785       | O7        | WURCIY         | 143.123       | S2        | SADFIP01       | 141.795       | O9        |
| MUJXIY         | 144.697       | O14       | DUCBAG         | 143.117       | CI6       | LUQKUG         | 141.736       | O9        |
| QATYAN         | 144.678       | N7        | JOTXUL         | 143.113       | N1        | LOWKEQ         | 141.723       | S2B       |
| DEBWIR         | 144.647       | I1        | IJPOI          | 143.08        | N2A       | HUKSUE         | 141.489       | N1        |
| ABUBEI         | 144.629       | N2        | FISCAL         | 143.045       | CI7       | DIJSIY         | 141.438       | S2        |
| DAVHEO         | 144.611       | O3        | XOKPAR         | 143.023       | CI1A      | ABOCAX         | 141.241       | O5        |
| DAVHEO         | 144.596       | O8        | BIXCUG         | 142.959       | O7A       | TOXFIX         | 141.233       | S1        |
| IJIMAR         | 144.544       | N2A       | SADFIP01       | 142.911       | O7        | CITHUJ         | 141.193       | N1        |
| KENZEK         | 144.517       | O5        | KEZBAT         | 142.86        | CI2       | MIKZIS         | 141.172       | N2        |
| KUJYOG         | 144.495       | CI8       | QATYOB         | 142.859       | CI2       | IYAJEA         | 141.157       | N1        |
| WIGNUW         | 141.112       | O21       | LITREL         | 139.472       | N4        | DAVHEO         | 136.922       | O6        |
| IZUPOK         | 141.034       | N3        | NIZSIY         | 139.449       | O13       | UGUBII         | 136.903       | O15       |
| JUVHIU         | 140.904       | N2        | OKIHIA         | 139.446       | S3        | AYIMUR         | 136.889       | N5D       |
| UJUWAA         | 140.893       | N1        | JATVAB         | 139.421       | N1        | MOVFEK         | 136.866       | N4A       |
| HULKUW         | 140.874       | N4        | FAQVEY         | 139.354       | S1        | LABPUD         | 136.685       | O18       |
| FEJRIZ         | 140.856       | CI2B      | ZIXTEI         | 139.303       | N2        | SADFIP01       | 136.65        | O8        |
| KUJVOB         | 140.81        | N2        | ZIXTEI01       | 139.293       | N2        | MOVFEK         | 136.603       | N4A       |
| HULKUW         | 140.783       | N5        | BIXCUG         | 139.247       | N2A       | SEPCIA         | 136.53        | N8        |
| BUTZEX         | 140.777       | I1D       | TOXFIX         | 139.21        | N1        | YACHIU         | 136.381       | N4        |
| DUCBAG         | 140.774       | CI5       | GIZVIV         | 139.166       | N5        | NALNUL         | 136.339       | O4        |
| DUCBAG         | 140.738       | O22       | YEVQIC         | 139.156       | N2        | MODKAS         | 136.249       | O8        |
| YEVQOI         | 140.737       | N2        | NALNUL         | 139.144       | O5        | EGUGIZ         | 136.216       | O28       |
| NODWIP         | 140.73        | N1        | BIXCUG01       | 139.113       | N2A       | MOVFEK         | 136.196       | N7A       |
| ZIXTEI01       | 140.667       | CI2       | RIBNAR         | 139.111       | O19       | NAYJIH         | 136.177       | N3        |
| HIYMOS         | 140.651       | N2A       | OCIVIG         | 139.002       | N1        | UJUWAA         | 136.084       | N1        |
| ZIXTEI         | 140.605       | CI1       | SACHOV         | 138.835       | CI2       | SAYLAF         | 136.044       | N2        |
| MIKZUE         | 140.559       | O3        | LUKYAS         | 138.774       | CI2       | ZIXTEI         | 136.043       | N2        |
| XOPWAB         | 140.54        | N10       | TRPHGA         | 138.715       | N2        | VUBKEI         | 136.042       | F2        |
| YUMBEP         | 140.514       | CI2       | WIGNUW         | 138.692       | CI4       | JIRMUT         | 135.981       | O6        |
| DAVHEO         | 140.479       | O16       | DUCBAG         | 138.691       | O20       | CUYGUZ         | 135.96        | O4        |
| QIXGUA         | 140.422       | N5A       | FEMSUL10       | 138.66        | N10       | ZIXTEI01       | 135.916       | N2        |
| DUXXEC         | 140.34        | N2        | BICZIW         | 138.633       | S1        | QEGQOJ         | 135.865       | O11       |
| KUJWOD         | 140.307       | CI3       | ZEDDUJ         | 138.593       | O3        | AFAPOP         | 135.854       | CI4F      |
| VOMQAR         | 140.243       | S3B       | AGAJUR         | 138.572       | O42       | JATVAB         | 135.844       | N6        |
| DOBDOO         | 140.171       | N2        | FASZIK         | 138.481       | N6A       | CUYGUZ         | 135.808       | CI1       |
| GOGLUK         | 140.141       | N7        | UJUWAA         | 138.445       | N1        | BUTZEX         | 135.797       | I2        |
| KUJYOG         | 140.112       | CI6       | IZUPUQ         | 138.371       | N7        | MOVFEK         | 135.787       | N1        |
| QATYAN         | 140.063       | O2        | VEZVED         | 138.347       | O11       | YESRUJ         | 135.786       | N1B       |
| MIKZUE         | 140.024       | O4        | FTFHGC10       | 138.312       | S6        | NALNEV         | 135.743       | O2        |
| FTFHGC10       | 140.019       | S7A       | DUNCOH         | 138.31        | CI3       | LITREL         | 135.708       | N3        |
| TRPHGA         | 140.011       | N2        | QEGQOJ         | 138.294       | O7        | ATAWOJ         | 135.685       | CI1       |
| HEKLUE         | 139.962       | O5        | LITREL         | 138.252       | N2        | MIKZUE         | 135.649       | O8        |
| VUWVUE         | 139.943       | N1        | TRPHGB         | 138.118       | N1        | MUJXIY         | 135.449       | O5        |
| DAVHEO         | 139.906       | O9        | RIBNAR         | 138.104       | O20       | XIPVOI         | 135.44        | S2        |
| SADFIP01       | 139.886       | O14B      | BELNIR         | 138.092       | F1        | POYYUY         | 135.396       | CI1       |
| RIBNAR         | 139.849       | O13A      | QEGQOJ         | 137.948       | O14       | JOZBEF         | 135.385       | S2        |
| BABXOV         | 139.836       | N3        | KIMFOB         | 137.937       | O4        | ADOKAG         | 135.314       | CI2       |
| AGOYEE         | 139.831       | N1        | PIXVEY         | 137.892       | O3        | ICEFAX         | 135.309       | F4        |
| RIBNAR         | 139.793       | N9A       | IJPOI          | 137.768       | O6A       | YEVQOI         | 135.094       | O1        |
| YEVRAV         | 139.769       | N2        | VUGHEK         | 137.436       | F5        | UQEREO         | 135.086       | N1        |
| POYYUY         | 139.74        | CI2       | AYIMUR         | 137.435       | N4D       | NIYDAA         | 134.982       | S18       |
| JAMMUI         | 139.718       | CI2A      | KUSMAM         | 137.419       | CI1       | IZUPOK         | 134.92        | N6        |
| OKIHIA         | 139.663       | S5        | KUSMAM01       | 137.342       | CI1       | VUGHEK         | 134.91        | P2        |
| KUJYIA         | 139.623       | CI6       | HADJII         | 137.242       | O1B       | VIXLIA         | 134.901       | S6        |
| SEPCIA         | 139.567       | N5        | KUJWOD         | 137.215       | CI7       | LELYEG01       | 134.86        | N1A       |
| JAGMOU         | 139.565       | CI2D      | JAGLUZ         | 137.185       | N5        | AFETAI         | 134.825       | O3        |
| AROVEJ         | 139.548       | O4        | RETJAB         | 137.111       | O3A       | VUGHEK         | 134.821       | F1        |

| <i>Refcode</i> | <i>∠YHgLB</i> | <i>LB</i> | <i>Refcode</i> | <i>∠YHgLB</i> | <i>LB</i> | <i>Refcode</i> | <i>∠YHgLB</i> | <i>LB</i> |
|----------------|---------------|-----------|----------------|---------------|-----------|----------------|---------------|-----------|
| UQEREO         | 139.508       | N2        | HULKUW         | 137.107       | N2        | PIXVEY         | 134.687       | O3        |
| PUPQUN         | 139.481       | N20       | RIBNAR         | 137.056       | O20       | MUJXIY         | 134.6         | O5        |
| AXOJAY         | 134.535       | CI2       | RIBNAR         | 131.57        | N11A      | DICMAE         | 126.373       | S2A       |
| HIDMAL         | 134.439       | N4        | KOYGOU         | 131.551       | N3        | HULKUW         | 126.174       | N4        |
| IZUPUQ         | 134.397       | N2        | XELQOV         | 131.413       | CI2       | VUWVIS         | 126.147       | N1        |
| JIRMUT         | 134.339       | O6        | HEQYIP         | 131.388       | N3        | RIBNAR         | 126.104       | N14       |
| YUMBEP         | 134.334       | O5        | UGUBUU         | 131.357       | N1        | XUKSAZ         | 126.054       | O12       |
| NODWUB         | 134.33        | O1        | FETHUI         | 131.105       | O2B       | OCIVIG         | 125.838       | O2        |
| NALNEV         | 134.325       | O7        | AVONIK         | 131.079       | N1        | HULKUW         | 125.809       | N3        |
| RASGIC         | 134.322       | N4        | YOHSUJ         | 131.051       | O4        | HULKUW         | 125.444       | N2        |
| VUWVUE         | 134.315       | N4        | BABXOV         | 130.984       | N2        | XOBBUN         | 125.28        | S4        |
| BICMUV         | 134.278       | O8        | PEJYIM         | 130.895       | O6        | ZOSDOD         | 125.228       | N3        |
| HULKUW         | 134.253       | N2        | TRPHGB         | 130.873       | N1        | ZOSDOD02       | 125.087       | N3        |
| YEVRAV         | 134.179       | O1        | FAHVEP         | 130.855       | N1        | HULKUW         | 124.927       | N4        |
| VEYFAH         | 134.078       | N3B       | OYILUF         | 130.786       | O2        | SUNHUH         | 124.896       | N2        |
| YOHSUJ         | 133.891       | O4        | VUWVUE         | 130.747       | N2        | SUNHUH         | 124.825       | N4        |
| RIHGUL         | 133.835       | N2        | HULKUW         | 130.592       | N3        | NUMMOX         | 124.817       | O3        |
| GAPCOT         | 133.779       | CI2       | RIBNAR         | 130.382       | O20       | OJANES         | 124.716       | N1        |
| UJECAN         | 133.756       | O2N       | QEGQOJ         | 129.922       | O1A       | JAVJUM         | 124.521       | N5        |
| AXOJAY         | 133.693       | O7        | GAPCOT         | 129.876       | CI2       | ZASLOU         | 124.315       | S15       |
| XUHGOX         | 133.566       | S1D       | BICMUV         | 129.786       | O1        | VUWVUE         | 124.31        | N3        |
| ANABUN         | 133.565       | O6        | FEMSUL10       | 129.647       | N6        | PEJYIM         | 124.206       | O8        |
| FAVVAZ         | 133.565       | S4        | HOMDUJ         | 129.413       | O2        | IFAWUH         | 123.633       | N5        |
| PIHJUM         | 133.23        | N1A       | QEGQOJ         | 129.41        | O5A       | FEMSUL10       | 123.515       | N5        |
| YOHSUJ         | 133.215       | O1        | YOHSUJ         | 129.387       | O1        | BUNQEH         | 122.249       | S2        |
| HEQYIP         | 133.151       | N3        | JATVAB         | 129.143       | N1        | JITJAX         | 121.809       | N1        |
| REZWEZ         | 133.1         | N1        | POYYUY         | 129.124       | O10       | PEJYIM         | 121.619       | N10       |
| DOBCAZ         | 133.075       | CI9A      | NALNUL         | 129.105       | N1        | XOBBUN         | 121.535       | S1        |
| ROVVAB         | 133.013       | S4A       | NALNEV         | 129.032       | N6        | AXOJAY         | 121.097       | O8        |
| QAHRIC         | 132.984       | CI3       | MODKAS         | 128.931       | O5        | ZEDDUJ         | 120.887       | O4        |
| XOKPAR         | 132.882       | S1A       | AXOJAY         | 128.925       | O2        | VOWZOW         | 120.811       | O28       |
| FAHVEP         | 132.753       | N3        | KUJYIA         | 128.818       | CI7       | BABXOV         | 120.522       | O4        |
| ANABOH         | 132.629       | O6        | ZOSDOD         | 128.78        | N1        | BUNQEH         | 120.508       | S1        |
| FODREX         | 132.62        | S3        | YOHSUJ         | 128.75        | O2        | RIBNAR         | 120.482       | N14       |
| VEZVED         | 132.604       | CI2       | ZOSDOD02       | 128.567       | N1        | RIBNAR         | 120.19        | O24       |
| OQAKAT         | 132.464       | S1        | OSUZUZ         | 128.533       | O1B       | CUYGUZ         | 119.051       | O5        |
| DUCBAG         | 132.42        | O12       | KUJYOG         | 128.351       | CI7       | EJOPEZ         | 118.9         | CI1       |
| MIKZUE         | 132.314       | O1        | FEJRIZ         | 128.24        | N2B       | RIBNAR         | 118.549       | O16       |
| VAZKIR         | 132.292       | S1B       | DUCBAG         | 128.214       | O9        | RIBNAR         | 118.099       | O22       |
| DOBDOO         | 132.24        | N2        | MODKAS         | 127.846       | O2        | UGUBUU         | 118.052       | O4        |
| IGEMOX         | 132.166       | CI1       | ICEFAX         | 127.827       | F1        | MOVFEK         | 118.043       | N8A       |
| RIBNAR         | 132.151       | O18       | RETJAB         | 127.721       | O10       | HIYMIM         | 118.025       | N2D       |
| RASGIC         | 132.129       | CI4       | FODRAT         | 127.66        | S1        | YACGUF         | 117.863       | N5        |
| YACHIU         | 132.092       | N8        | LUKYAS         | 127.542       | CI1       | ICEFAX         | 117.304       | F2        |
| DAXFUG         | 131.997       | O2        | HULKUW         | 127.536       | N5        | MUJXIY         | 117.065       | O4        |
| QEGQOJ         | 131.878       | O18       | SACHOV         | 127.409       | CI1       | NIZSIY         | 116.529       | O16       |
| KIMFOB         | 131.873       | O7        | MIKZUE         | 127.221       | O7        | RIBNAR         | 115.786       | O21       |
| UGUBII         | 131.858       | O7        | LITREL         | 127.089       | N1        | BABXOV         | 115.636       | O2        |
| DUCBAG         | 131.67        | O24       | FETHUI         | 126.999       | O1B       | VOWZOW         | 112.675       | O28       |
| RIBNAR         | 131.65        | O18       | HEQYIP         | 126.73        | N2        | XUHGOX         | 112.12        | N2D       |
| YEVQUO         | 131.607       | I1        | DUCBAG         | 126.534       | O25       | RIBNAR         | 111.884       | O21       |
| RIBNAR         | 111.664       | O18       | BICMUV         | 109.87        | O4        | RIBNAR         | 109.488       | O21       |
| RIBNAR         | 109.071       | O22       | VOWZOW         | 107.802       | O17       | GEVJIA         | 106.494       | O10       |
| RIBNAR         | 108.667       | O23       | RIBNAR         | 107.323       | O23       | JIRMUT         | 105.761       | N4        |
| AWOYAN         | 108.413       | O5        | VOWZOW         | 106.878       | O32       | ICEFAX         | 104.456       | F3        |
| VOWZOW         | 103.438       | O24       | YAZQEZ         | 102.986       | O6B       | VOWZOW         | 99.933        | O28       |



**(d) Refcodes,  $\angle Y-Zn\cdots O$  angles and  $Zn\cdots O$  distances ( $d_{ZnO}$ ) for the distance-cone correction of  $ZnY_5\cdots O$  systems.**

| Refcodes | $\angle YZnO$ | $d_{ZnO}$ | Refcodes | $\angle YZnO$ | $d_{ZnO}$ | Refcodes | $\angle YZnO$ | $d_{ZnO}$ |
|----------|---------------|-----------|----------|---------------|-----------|----------|---------------|-----------|
| YETJIR   | 180           | 3.945     | SEWVEZ   | 178.29        | 3.856     | XULZIQ   | 177.012       | 4.349     |
| BEPNER   | 180           | 3.701     | LIHXUX   | 178.277       | 4.208     | CUJFOF   | 177.005       | 3.884     |
| UNOKIS   | 180           | 3.968     | XIYCIV   | 178.142       | 4.133     | SUWBOC   | 177.003       | 3.871     |
| HAJBAW   | 180           | 4.305     | QUJZAZ   | 178.069       | 4.257     | EXIFUN   | 176.984       | 3.632     |
| AFEGAV   | 180           | 4.212     | PEWGEE   | 178.064       | 4.177     | DOMYUC01 | 176.964       | 3.766     |
| AFEGAV01 | 180           | 4.18      | VIRLAK   | 178.056       | 3.739     | ZIVSIK   | 176.93        | 4.222     |
| FUBNOH   | 180           | 4.113     | FIQDAN   | 178.048       | 3.834     | MIKBOY   | 176.922       | 4.382     |
| HUZHAM   | 180           | 4.011     | DOCFUX   | 177.884       | 4.399     | XAPGAZ   | 176.893       | 3.72      |
| IFABIA01 | 180           | 4.38      | WEMZUJ   | 177.876       | 3.451     | DAWQOK   | 176.858       | 3.531     |
| IFABIA03 | 180           | 4.374     | PAHROG   | 177.875       | 3.847     | XEKGEB   | 176.832       | 3.951     |
| LEQWIP   | 180           | 4.371     | LOWGEM   | 177.868       | 3.883     | WIYCAL   | 176.83        | 3.448     |
| MIMRAB   | 180           | 4.359     | HOPTOY   | 177.866       | 4.181     | ZAZKIU   | 176.79        | 4.178     |
| MIMRAB02 | 180           | 4.38      | KAXXEO   | 177.834       | 4.244     | HAZQIJ   | 176.786       | 3.627     |
| RIWWOK   | 180           | 4.301     | XEQNIR   | 177.833       | 3.625     | EFUJIA   | 176.771       | 3.003     |
| YETJIR   | 180           | 3.938     | RUZVOX   | 177.799       | 3.337     | FUGLOJ   | 176.739       | 4.335     |
| RIDXIM   | 180           | 3.83      | MIMRAB01 | 177.678       | 4.374     | SOFFEA   | 176.731       | 3.984     |
| RIDXIM   | 180           | 3.649     | BIBGOJ   | 177.65        | 4.378     | BEMZEC   | 176.716       | 2.855     |
| HUCLOH   | 180           | 2.852     | UMIJAD   | 177.647       | 2.715     | VIXTOM   | 176.711       | 4.212     |
| IWORET01 | 180           | 4.144     | TOKVUK   | 177.616       | 4.212     | HOCCIO   | 176.683       | 3.885     |
| POLDOL   | 180           | 3.568     | QORKIR   | 177.583       | 3.694     | DOYBOJ   | 176.646       | 4.306     |
| CITTUW   | 180           | 4.362     | BUSLOS   | 177.542       | 2.626     | BECSEK   | 176.643       | 3.018     |
| GATVAZ   | 180           | 4.064     | IPAPEU   | 177.508       | 3.932     | YIRPUO   | 176.623       | 4.383     |
| LAYXAM   | 180           | 3.965     | VUDMAK   | 177.499       | 2.595     | SENJEB   | 176.591       | 3.533     |
| GEZKED   | 179.992       | 4.215     | GIWHEA   | 177.496       | 3.775     | YIRPUO02 | 176.551       | 4.394     |
| YIQDOV   | 179.858       | 4.348     | KUCVEL   | 177.488       | 2.672     | VIRLAK   | 176.523       | 3.876     |
| QIXWUR   | 179.7         | 4.237     | BETTEC   | 177.486       | 4.162     | VAXVOJ   | 176.493       | 3.858     |
| NIDDIO   | 179.279       | 3.505     | XABRIE   | 177.468       | 4.132     | YIRPUO01 | 176.482       | 4.395     |
| MIKBUE   | 179.218       | 4.294     | PICBAE   | 177.467       | 3.005     | YEQRIZ   | 176.473       | 3.768     |
| LILVAD   | 179.211       | 2.827     | WIRHUD   | 177.426       | 3.099     | XUYXAR   | 176.471       | 3.382     |
| LEDVOJ   | 179.194       | 3.025     | IPIKIQ   | 177.412       | 4.223     | VIRLAK   | 176.462       | 3.805     |
| QUXVUB   | 179.155       | 4.347     | RUWMON   | 177.406       | 3.023     | GANGOS   | 176.453       | 4.297     |
| MUJHOP   | 179.106       | 4.088     | WARDUP   | 177.403       | 4.27      | EYERAB   | 176.451       | 3.96      |
| JESSUW   | 179.098       | 4.382     | QOLPEO   | 177.392       | 2.866     | MOCTEF   | 176.435       | 4.387     |
| ADIZAP   | 179.095       | 3.532     | DOZFOO   | 177.301       | 4.064     | GABVUD   | 176.418       | 3.931     |
| TAZJAH   | 178.963       | 4.192     | NUWPAZ   | 177.293       | 2.755     | DOMYUC02 | 176.393       | 3.756     |
| OGUNIP   | 178.852       | 4.123     | BOBHEF   | 177.236       | 3.834     | POQSJ    | 176.367       | 3.726     |
| MIKCEP   | 178.84        | 4.229     | IZOWAW   | 177.234       | 4.295     | SEPMOS   | 176.362       | 4.131     |
| BINBAE   | 178.812       | 3.164     | MOJKAY   | 177.199       | 3.799     | FAVQOK   | 176.339       | 4.141     |
| DITWEL   | 178.7         | 3.188     | UFUHAE   | 177.158       | 3.886     | TIBQAA   | 176.337       | 3.257     |
| FODXAA   | 178.672       | 3.897     | DEHPOX   | 177.145       | 4.143     | MIKCEP   | 176.269       | 4.327     |
| SIYFUD   | 178.623       | 2.684     | VUDMUE   | 177.117       | 2.629     | QORFAE   | 176.267       | 3.078     |
| NEPMIF   | 178.59        | 3.93      | UDACEH   | 177.109       | 3.148     | IFABIA02 | 176.257       | 4.352     |
| YARBIE   | 178.567       | 4.241     | EBITUG   | 177.094       | 4.248     | MATNIF   | 176.213       | 4.403     |
| LUXVOR   | 178.529       | 4.052     | CAYWEG   | 177.066       | 3.534     | MADRAN   | 176.157       | 3.97      |
| TUQWAG   | 178.404       | 4.202     | MATNIF   | 177.062       | 4.313     | TAZJAH   | 176.146       | 4.264     |
| SOPNOB   | 178.368       | 3.934     | RAHFIP   | 177.059       | 4.377     | MUJHOP   | 176.133       | 4.017     |
| FELPES   | 178.309       | 3.097     | VIRLAK   | 177.052       | 3.696     | MIKCER   | 176.131       | 4.144     |
| SAKRAZ   | 176.078       | 4.117     | ILUSIS   | 175.23        | 2.69      | VIBJEW   | 174.464       | 4.079     |
| SIGZEQ   | 176.068       | 4.045     | GICLUB   | 175.207       | 2.644     | RETJIL   | 174.434       | 3.841     |
| TUQWEK   | 176.06        | 4.279     | ICUDUG   | 175.194       | 4.385     | RETJIL01 | 174.434       | 3.841     |
| MOSMEO   | 176.037       | 4.4       | NOPCOK   | 175.174       | 4.284     | FAFDUM   | 174.424       | 4.059     |
| FEFVAO   | 176.032       | 3.032     | CUBWIG   | 175.171       | 3.995     | WENDEA   | 174.419       | 3.911     |
| ICUGET   | 175.986       | 3.407     | ECUGOA   | 175.14        | 3.819     | VIMNAJ   | 174.368       | 3.681     |
| UKEHOJ   | 175.983       | 2.665     | ZEQLAK   | 175.123       | 4.175     | HAHCIF   | 174.365       | 3.906     |
| UDIRUW   | 175.962       | 3.82      | REXPAO   | 175.106       | 3.535     | XOJWUP   | 174.363       | 4.402     |
| BAMZAR   | 175.957       | 4.347     | DELWUQ   | 175.048       | 4.3       | TAZJAH   | 174.362       | 3.942     |

| Refcodes | ∠YZnO   | d <sub>ZnO</sub> | Refcodes | ∠YZnO   | d <sub>ZnO</sub> | Refcodes | ∠YZnO   | d <sub>ZnO</sub> |
|----------|---------|------------------|----------|---------|------------------|----------|---------|------------------|
| IGETUK   | 175.887 | 4.101            | BINKUI   | 175.031 | 2.873            | EVAJUI   | 174.352 | 4.21             |
| PAQKUR   | 175.875 | 4.13             | FEJJOV   | 175.005 | 4.026            | QIDQON   | 174.34  | 3.794            |
| XIKRUH   | 175.865 | 4.126            | NANHAO   | 175.004 | 3.61             | SATYES   | 174.314 | 3.323            |
| TAYBII   | 175.842 | 2.838            | PAKVOM   | 174.959 | 4.333            | AFOHIN   | 174.307 | 4.023            |
| CUYTUM   | 175.828 | 4.409            | QUXLIF   | 174.946 | 3.303            | QIJZAN   | 174.305 | 4.283            |
| YIZCUH   | 175.817 | 3.031            | NEQDIW   | 174.939 | 2.573            | CUJFOF   | 174.303 | 4.337            |
| UFEBIT   | 175.793 | 3.655            | MOHRAD   | 174.927 | 2.705            | ISEMEZ   | 174.302 | 3.778            |
| CUBWIG   | 175.772 | 3.696            | MIPYIU   | 174.917 | 2.753            | MIVDIF   | 174.3   | 3.22             |
| RUYTAG   | 175.71  | 3.709            | CADBOC   | 174.898 | 3.429            | XASDAZ   | 174.288 | 2.766            |
| DASQAQ   | 175.701 | 3.743            | KEKHEP   | 174.888 | 3.42             | NUMLAK   | 174.263 | 4.11             |
| CAFSEJ   | 175.672 | 3.571            | LEZVIW   | 174.885 | 3.501            | VUMVEH   | 174.259 | 4.211            |
| NOPCOK   | 175.659 | 4.299            | QOFKIF   | 174.854 | 3.785            | RAQBAO   | 174.253 | 4.147            |
| WUSFAU   | 175.628 | 2.975            | XEHYAM   | 174.846 | 4.117            | GAKDAX   | 174.216 | 4.008            |
| CEYSEF   | 175.608 | 3.707            | OHUQAJ   | 174.819 | 3.968            | KEPGOF   | 174.188 | 3.592            |
| QETFIF   | 175.599 | 3.104            | ONIWAK   | 174.815 | 3.14             | UMIQOW   | 174.163 | 3.63             |
| TEHDOA   | 175.599 | 3.979            | SAKRAZ   | 174.785 | 3.723            | GUQLUA   | 174.122 | 4.371            |
| ETANOD   | 175.592 | 4.184            | NUYVOT   | 174.779 | 3.961            | POGMIK   | 174.078 | 3.275            |
| NECVAT   | 175.57  | 3.22             | FIFXAU   | 174.763 | 4.094            | NEMVAD   | 174.066 | 3.156            |
| ROBCIU   | 175.567 | 4.017            | YIBCAR   | 174.748 | 3.906            | GUGYEP   | 174.056 | 4.391            |
| LOLRUC   | 175.559 | 3.893            | WENPIO   | 174.745 | 3.894            | OHUQAJ   | 174.025 | 4.039            |
| XUNWIM   | 175.551 | 2.874            | GABBOD   | 174.735 | 2.981            | CUYDEH   | 174.019 | 3.835            |
| JIQVEN   | 175.549 | 4.318            | KAWXUB   | 174.7   | 3.05             | XUSGUN01 | 173.975 | 4.262            |
| FEDYEU   | 175.544 | 2.738            | YEJNUA   | 174.696 | 4.331            | HESPOK   | 173.971 | 3.443            |
| PUDBIB   | 175.499 | 4.399            | HAGKAE   | 174.688 | 3.667            | HESPOK10 | 173.971 | 3.443            |
| BUBYOO   | 175.463 | 2.754            | FOFVIG   | 174.686 | 2.625            | PEMBOY   | 173.963 | 3.209            |
| XAPXOB   | 175.456 | 3.009            | DASPUJ   | 174.671 | 3.794            | RUZSUA   | 173.961 | 3.034            |
| MIHNOH   | 175.453 | 4.096            | EIQIQIG  | 174.656 | 3.455            | QUGFII03 | 173.941 | 3.57             |
| BINBAE   | 175.44  | 3.292            | TAXLIO   | 174.646 | 2.676            | XUGBOR   | 173.937 | 4.328            |
| SESFAY   | 175.418 | 3.999            | PELQUT   | 174.639 | 3.454            | FELJAK   | 173.934 | 3.724            |
| QANTIJ   | 175.386 | 2.589            | MOSKAJ   | 174.625 | 3.926            | EVUSEU   | 173.919 | 3.517            |
| UYAJIO   | 175.381 | 4.404            | BAYYEI   | 174.617 | 4.328            | XASDIH   | 173.904 | 2.681            |
| SUZGEZ   | 175.366 | 3.388            | DEBGEY   | 174.614 | 3.321            | XALJIE   | 173.897 | 2.912            |
| UFEBIT01 | 175.363 | 3.653            | WIYCAL   | 174.61  | 2.626            | SESHUW   | 173.89  | 3.91             |
| NIDMOD   | 175.355 | 2.601            | WASQIR   | 174.609 | 3.542            | MARDAN   | 173.887 | 3.554            |
| FODGAI   | 175.354 | 2.918            | MOFWUA   | 174.566 | 3.99             | GUXJAN   | 173.841 | 3.18             |
| FOZGOT   | 175.336 | 3.695            | XUSGUN   | 174.548 | 3.814            | ZZZDVY02 | 173.838 | 3.441            |
| NOPCOK   | 175.322 | 4.32             | EYAYAG   | 174.548 | 2.671            | QUXVUB   | 173.834 | 4.213            |
| RUCPAH   | 175.308 | 4.008            | VAVKEK   | 174.519 | 4.32             | NIQLAC   | 173.826 | 3.487            |
| QUGFII   | 175.297 | 3.598            | QITRET   | 174.497 | 3.48             | JUGXER   | 173.804 | 3.158            |
| WIYXUZ   | 175.233 | 4.266            | IJEDIL   | 174.48  | 3.8              | GUDFIX   | 173.797 | 3.795            |
| GABBOD   | 173.775 | 3.389            | SESFAY01 | 173.16  | 3.881            | RAPRIN   | 172.558 | 3.93             |
| AQOHAQ   | 173.768 | 2.875            | SESFAY   | 173.148 | 3.884            | ZUYNAL   | 172.552 | 3.525            |
| FEXPOP   | 173.767 | 3.165            | FAXCUF   | 173.136 | 4.319            | MOJKAY   | 172.524 | 3.403            |
| GIZFAZ   | 173.759 | 3.968            | FOWQEQ   | 173.124 | 3.087            | ABAYUY   | 172.514 | 3.674            |
| HIBTOB   | 173.733 | 3.779            | MODZOX   | 173.108 | 4.13             | LMETZN01 | 172.498 | 2.656            |
| QEKNAZ   | 173.727 | 2.702            | DEFHUT   | 173.1   | 2.957            | PUPVEC   | 172.497 | 3.481            |
| VEHLUQ   | 173.724 | 4.13             | NILYUG   | 173.083 | 4.172            | SESHUW   | 172.492 | 3.908            |
| FOFVIG   | 173.696 | 2.706            | NETFUQ   | 173.072 | 3.822            | CUBFAH   | 172.491 | 4.25             |
| BOCROD   | 173.652 | 4.081            | IQUMIQ   | 173.054 | 2.547            | LOVQUI   | 172.47  | 3.638            |
| BIPKUK   | 173.64  | 3.866            | XUXQEN   | 173.048 | 3.919            | IQEJUK   | 172.47  | 3.943            |
| MAQLEY   | 173.602 | 3.864            | MOSNEN   | 173.039 | 2.56             | FEDYEU   | 172.456 | 2.702            |
| KATQAX   | 173.589 | 3.645            | KUBTIL   | 173.015 | 4.154            | ODUSEL   | 172.433 | 4.225            |
| HEQQUR   | 173.534 | 2.937            | BEMHAG   | 173.007 | 3.821            | PIXWOL   | 172.396 | 4.096            |
| RUVHOF   | 173.505 | 3.315            | NAKPUM   | 173.007 | 2.86             | ESISIK   | 172.387 | 3.884            |
| LEZNUC   | 173.503 | 3.747            | KIGBIL   | 172.955 | 3.757            | QOPHAF   | 172.385 | 4.244            |
| ICUFES   | 173.502 | 3.36             | MUJKEI   | 172.955 | 4.392            | GUXJER   | 172.38  | 3.241            |
| YEJNEK   | 173.483 | 4.33             | MOJKAY   | 172.95  | 3.891            | LEZVIW   | 172.371 | 4.214            |
| POSBEG   | 173.478 | 4.346            | PIJKAV   | 172.936 | 4.274            | HIBTOB01 | 172.366 | 3.706            |
| SARCUN   | 173.472 | 4.016            | XULFEQ   | 172.917 | 4.359            | JOFMAV   | 172.343 | 4.222            |

| Refcodes | ∠YZnO   | d <sub>ZnO</sub> | Refcodes | ∠YZnO   | d <sub>ZnO</sub> | Refcodes | ∠YZnO   | d <sub>ZnO</sub> |
|----------|---------|------------------|----------|---------|------------------|----------|---------|------------------|
| XUSGUN   | 173.465 | 3.734            | CUHKUN   | 172.904 | 3.656            | MARDAN   | 172.324 | 4.014            |
| TEWCOP   | 173.456 | 3.614            | MOJKAY   | 172.89  | 3.566            | MOJKAY   | 172.322 | 3.909            |
| REGQUT   | 173.431 | 3.919            | BAQHEG   | 172.873 | 2.821            | QUBZOD   | 172.32  | 3.71             |
| XULZIQ   | 173.429 | 4.232            | KATHUM   | 172.87  | 3.389            | DAFYIW   | 172.312 | 4.053            |
| OZINIW   | 173.428 | 3.091            | SEBBAF   | 172.858 | 4.135            | FIZWAO   | 172.304 | 4.161            |
| ADIZAP   | 173.424 | 3.805            | KEMKET   | 172.831 | 4.29             | ODUROU   | 172.302 | 4.214            |
| XUSGUN01 | 173.396 | 4.114            | LOSCEC   | 172.824 | 4.06             | MUJKEI   | 172.291 | 3.963            |
| BUYBED   | 173.386 | 3.745            | QOFKIF   | 172.815 | 4.086            | NEPMIF   | 172.275 | 4.006            |
| NITVER   | 173.385 | 3.501            | GUQLUA   | 172.806 | 4.329            | CTAZZN   | 172.271 | 4.37             |
| EWESAC   | 173.382 | 3.096            | LMETZN   | 172.797 | 2.729            | RAXNAH   | 172.263 | 2.693            |
| LULXEX   | 173.379 | 3.056            | KIRMOR   | 172.793 | 3.73             | ZUBZEB   | 172.262 | 3.669            |
| DUVHEJ   | 173.37  | 4.231            | RUZVAJ   | 172.776 | 2.854            | QOFKIF   | 172.255 | 3.768            |
| IXEBIW   | 173.354 | 3.715            | OQEYUG   | 172.764 | 2.747            | ROMQAN   | 172.244 | 3.802            |
| TOJBIF   | 173.349 | 3.384            | YATKAG   | 172.753 | 3.874            | ZERVIE   | 172.172 | 4.13             |
| JOBYEG   | 173.341 | 3.858            | BOSQIK   | 172.747 | 4.209            | COVQIQ   | 172.151 | 3.783            |
| BASZUU   | 173.335 | 4.28             | BAYYEI   | 172.744 | 3.445            | IGAVAN   | 172.123 | 3.587            |
| TEHDOA   | 173.308 | 3.518            | PEMBOY   | 172.742 | 3.046            | ROBCEQ   | 172.117 | 4.196            |
| IJIVAZ   | 173.296 | 3.752            | XOZGIE   | 172.731 | 4.045            | IGAVAN01 | 172.096 | 3.625            |
| WIJDAV   | 173.286 | 4.221            | QORJIQ   | 172.721 | 3.814            | HALXAT   | 172.094 | 2.736            |
| ROXCEP   | 173.286 | 3.73             | YATKAG   | 172.715 | 4.275            | XUSGUN01 | 172.092 | 2.856            |
| XAVKEN   | 173.286 | 4.185            | UGADIP   | 172.691 | 4.291            | ICUFOC   | 172.081 | 4.362            |
| RAHGUG   | 173.282 | 4.382            | IGAVAN   | 172.684 | 3.621            | WAVDAY   | 172.047 | 3.444            |
| YEVKIU   | 173.274 | 4.108            | PUWKUP   | 172.676 | 3.129            | SITVUN   | 172.045 | 3.82             |
| CIDTUH   | 173.264 | 4.117            | VIVNOF   | 172.67  | 3.808            | XEHTUA   | 172.043 | 3.897            |
| ESIRII   | 173.263 | 2.599            | FOMCUH   | 172.649 | 3.982            | EYERAB   | 172.037 | 3.839            |
| MOJKAY   | 173.233 | 3.486            | LEZVIW   | 172.638 | 3.738            | EBAWAH   | 172.03  | 3.915            |
| MATVAG   | 173.2   | 3.567            | DEHPEN   | 172.606 | 4.301            | BAMZAR   | 172.019 | 4.225            |
| XUPROR   | 173.182 | 3.507            | CAFSAF   | 172.594 | 3.605            | WEBRUT   | 172.018 | 4.004            |
| HOXMIQ   | 173.182 | 4.126            | RUZSUA   | 172.584 | 3.525            | TAZJAH   | 171.988 | 4.019            |
| UKEHOJ   | 173.18  | 4.313            | WALBOC   | 172.566 | 3.922            | MCYSZN   | 171.982 | 3.605            |
| IJEDIL   | 171.978 | 4.103            | VIQYEA   | 171.51  | 3.978            | COFDAE   | 170.866 | 4.063            |
| TESNUC   | 171.975 | 4.27             | MIGNUN   | 171.502 | 3.974            | DEHPOX   | 170.861 | 3.868            |
| SARCIA   | 171.924 | 3.797            | RIDWUX   | 171.501 | 3.811            | CEWCAJ   | 170.854 | 3.676            |
| IGAVAN01 | 171.902 | 3.606            | XUXQAJ   | 171.5   | 3.72             | HETBUE   | 170.828 | 3.505            |
| OPAZN    | 171.898 | 3.123            | AHOFUZ   | 171.48  | 3.215            | BIPKUK   | 170.828 | 3.823            |
| AEPYZN   | 171.876 | 4.044            | DASSIZ   | 171.479 | 4.016            | GOBJAK   | 170.826 | 2.839            |
| VAXBAY   | 171.865 | 4.277            | MOSNEN   | 171.461 | 2.602            | WASFIF   | 170.824 | 3.708            |
| SIBMEW   | 171.856 | 3.734            | RIDWUX   | 171.399 | 3.702            | WEKLOP   | 170.817 | 3.102            |
| WALBOC01 | 171.854 | 3.935            | BERYAC   | 171.397 | 3.271            | EKOBUK   | 170.817 | 3.636            |
| IJOYEN   | 171.818 | 3.346            | TUDGUX   | 171.372 | 3.381            | KAXXEO   | 170.806 | 3.988            |
| DIWREJ   | 171.814 | 3.901            | CAYWEG   | 171.366 | 3.808            | XUGDEK   | 170.779 | 3.402            |
| XUSGEA   | 171.776 | 3.365            | MOJKAY   | 171.346 | 3.545            | TIVJIT   | 170.77  | 2.762            |
| QIBNOE02 | 171.772 | 2.936            | ROBCEQ   | 171.322 | 4.204            | KENJEU   | 170.768 | 4.196            |
| TAZJAH   | 171.768 | 4.01             | FIDFUU   | 171.313 | 2.902            | EFASUA   | 170.766 | 3.753            |
| QIBNOE01 | 171.765 | 2.933            | KARDEO   | 171.307 | 2.501            | IWEMUT   | 170.764 | 3.648            |
| EYURUN   | 171.745 | 3.968            | XABRIE   | 171.306 | 4.02             | XEKGEB   | 170.757 | 4.244            |
| DUVHIN   | 171.738 | 4.281            | IQERAA   | 171.287 | 3.698            | WARFAX   | 170.735 | 4.35             |
| TUFHAE   | 171.735 | 3.285            | WEDYUB   | 171.231 | 4.154            | JANLUF   | 170.733 | 3.659            |
| KATVOR   | 171.733 | 4.072            | SUWBOC   | 171.206 | 3.979            | WUWGON   | 170.725 | 4.09             |
| XUSGUN   | 171.727 | 3.843            | FUMGOL   | 171.183 | 4.301            | GIZTEQ   | 170.72  | 2.896            |
| SINXEU   | 171.719 | 3.985            | MOJKAY   | 171.156 | 3.651            | KUBTIL   | 170.719 | 4.171            |
| QUCRIQ   | 171.718 | 3.691            | KUBVIO   | 171.149 | 3.782            | MOJKAY   | 170.719 | 3.792            |
| NAWTEO   | 171.702 | 4.087            | ADIGUQ   | 171.135 | 4.297            | MOJKAY   | 170.714 | 3.8              |
| TESNUC   | 171.7   | 3.575            | REGQUT   | 171.129 | 3.924            | DOSVAJ   | 170.7   | 3.889            |
| UPIGAC   | 171.674 | 3.873            | HYZCZN   | 171.129 | 3.551            | LAFQEP   | 170.7   | 4.04             |
| ZINWUO   | 171.666 | 4.001            | SOPWIF   | 171.104 | 3.94             | GUCYOT   | 170.692 | 4.158            |
| ZINWUO10 | 171.666 | 4.001            | NUCDIZ   | 171.1   | 4.408            | WALBOC02 | 170.68  | 3.956            |
| ZAZKIU   | 171.647 | 3.668            | KEPGOF   | 171.091 | 3.514            | WUWSIT   | 170.68  | 3.175            |
| RIHDUJ   | 171.642 | 3.822            | PIBBUA   | 171.09  | 2.609            | XULZIQ   | 170.675 | 4.012            |

| Refcodes | ∠YZnO   | d <sub>ZnO</sub> | Refcodes | ∠YZnO   | d <sub>ZnO</sub> | Refcodes | ∠YZnO   | d <sub>ZnO</sub> |
|----------|---------|------------------|----------|---------|------------------|----------|---------|------------------|
| MARDAN   | 171.64  | 3.989            | UJIRUB   | 171.061 | 3.382            | MAKYUS   | 170.648 | 4.366            |
| UQULUQ   | 171.636 | 4.113            | NUDXOC   | 171.055 | 4.087            | JEXQEJ   | 170.645 | 3.192            |
| UJEYIT   | 171.626 | 4.34             | YAFJAS   | 171.051 | 4.392            | MARDAN   | 170.639 | 3.758            |
| LOSCEC   | 171.622 | 3.19             | TOJBIF   | 171.03  | 4.19             | PAHQAU   | 170.639 | 4.379            |
| QIBYUZ   | 171.621 | 3.48             | SUSPOL   | 171.005 | 4.175            | HESPOK   | 170.638 | 4.082            |
| FUJNEF   | 171.612 | 3.95             | KEHLAO   | 171.004 | 2.757            | HESPOK10 | 170.638 | 4.082            |
| NOLGIG   | 171.608 | 4.332            | AREGAF   | 171.002 | 4.143            | QUSVIJ   | 170.632 | 4.149            |
| AFUWEG   | 171.604 | 3.707            | BIZDAT   | 170.995 | 3.797            | WOJJEK   | 170.627 | 4.179            |
| QIBNOE   | 171.604 | 2.934            | KAPWUV   | 170.986 | 2.372            | JARKOG   | 170.623 | 3.835            |
| WABBEI   | 171.602 | 4.042            | UGUKUD   | 170.967 | 4.381            | SARCIA   | 170.611 | 3.798            |
| YEJBAS   | 171.588 | 3.869            | RUWMED   | 170.952 | 3.501            | QEVVUW   | 170.591 | 3.619            |
| ETIDOD   | 171.585 | 4.125            | NIPHEZ   | 170.921 | 4.063            | QANCAJ   | 170.591 | 4.204            |
| UNABAN   | 171.567 | 3.46             | YOLYIK   | 170.919 | 3.159            | XOQZUZ   | 170.591 | 3.481            |
| XIDNOP   | 171.567 | 4.15             | KAMLER   | 170.915 | 3.409            | XACRUQ   | 170.582 | 3.757            |
| GUNGUU   | 171.556 | 4.181            | NOZLIX   | 170.902 | 3.77             | MIKCEP   | 170.579 | 4.354            |
| RIDWUX   | 171.548 | 2.93             | TIVJIT   | 170.897 | 2.605            | NEMTUV   | 170.555 | 3.685            |
| HOXTUL   | 171.547 | 3.654            | OQITUE   | 170.891 | 4.195            | VAVBUQ   | 170.531 | 4.079            |
| MARDAN   | 171.525 | 4.212            | MATVAG   | 170.887 | 3.644            | RAFWUS   | 170.503 | 2.618            |
| MOSNOX   | 171.516 | 4.287            | SESHUW   | 170.869 | 3.919            | XASDAX   | 170.451 | 3.445            |
| LEZVIW   | 171.512 | 3.818            | HATVOQ   | 170.867 | 4.149            | ZUSJII   | 170.439 | 3.69             |
| PEDXOM   | 170.433 | 3.785            | GOBJAK   | 169.888 | 2.87             | VUQXOX   | 169.343 | 4.023            |
| RAJHIU   | 170.414 | 4.144            | BIMDOT   | 169.879 | 3.343            | IDAQIP   | 169.333 | 4                |
| GOSNAG   | 170.404 | 4.28             | AGOJOX   | 169.869 | 3.631            | VAJXAI   | 169.327 | 3.218            |
| ARUPUB   | 170.403 | 3.778            | OFOMEI   | 169.859 | 4.161            | ZUBZAX   | 169.308 | 3.576            |
| NACZEW   | 170.363 | 3.473            | PAKVOM   | 169.847 | 3.9              | EROTAJ   | 169.291 | 3.781            |
| UMOLAJ   | 170.342 | 3.883            | DATFUZ   | 169.84  | 3.527            | IFIXIE   | 169.291 | 3.845            |
| KEYXAO   | 170.342 | 3.933            | OYAPOV   | 169.832 | 3.596            | QUSVEF   | 169.287 | 3.305            |
| YEQSOF   | 170.339 | 3.383            | JAIXOI   | 169.818 | 3.408            | EBUBEL01 | 169.283 | 4.09             |
| CIWVAG   | 170.306 | 3.766            | ADOKEN   | 169.816 | 3.571            | UVUFY    | 169.275 | 4.363            |
| ICUFIW   | 170.275 | 3.7              | MOJKAY   | 169.808 | 3.923            | FIKNIX   | 169.275 | 3.345            |
| EREJOD   | 170.248 | 3.643            | ZAZKIU   | 169.749 | 3.7              | WINGIL   | 169.274 | 3.383            |
| HUZZUY   | 170.239 | 3.345            | GETNUS   | 169.726 | 3.629            | WUWRIS   | 169.25  | 3.202            |
| YEKXAR   | 170.238 | 3.832            | WARDUP   | 169.721 | 4.37             | GUVFUY   | 169.243 | 4                |
| SUWBOC   | 170.237 | 4.211            | SIQZOL   | 169.714 | 4.287            | IQIBAN   | 169.24  | 2.627            |
| KAPBEJ   | 170.227 | 3.37             | WAVDAY   | 169.713 | 4.213            | ODUSEL   | 169.224 | 3.931            |
| UCUJIO   | 170.224 | 3.359            | KENKAR   | 169.713 | 2.3              | TIVJIT   | 169.207 | 2.725            |
| ZZZDVY03 | 170.222 | 3.563            | IDUJAT   | 169.704 | 3.625            | PEPHID   | 169.205 | 4.155            |
| LERNAZ   | 170.189 | 2.31             | SEGDIT   | 169.701 | 4.15             | JUYROM   | 169.198 | 3.065            |
| JOBPUL   | 170.184 | 3.577            | FASWED   | 169.694 | 3.92             | UMAWOV   | 169.174 | 4.027            |
| FUJBOD   | 170.18  | 4.178            | QIDQUT   | 169.68  | 3.8              | EYERAB   | 169.167 | 4.026            |
| MARDAN   | 170.162 | 3.962            | AGOHOV   | 169.68  | 3.839            | LUBPEG   | 169.16  | 4.211            |
| ZINLUG   | 170.154 | 3.963            | DEKCEF   | 169.678 | 4.155            | PUWKUP   | 169.15  | 4.267            |
| UZOKUR   | 170.149 | 3.772            | NONNEM   | 169.676 | 4.183            | DEBSUZ   | 169.146 | 4.268            |
| WUZFIH   | 170.144 | 4.183            | QITRET   | 169.676 | 4.071            | QUSVEF   | 169.142 | 4.074            |
| KEMKET   | 170.137 | 4.114            | XASDAX   | 169.665 | 3.573            | GAKDAX   | 169.129 | 3.941            |
| OMIDAQ   | 170.132 | 3.186            | NUDNIL   | 169.661 | 4.376            | GUPBOK   | 169.126 | 3.179            |
| GEVFAR   | 170.123 | 3.496            | MUHVIW   | 169.646 | 3.954            | GUVFUY   | 169.121 | 4.031            |
| HIBHEJ   | 170.103 | 3.083            | EMAQOB   | 169.628 | 3.847            | WEMZUJ   | 169.105 | 4.404            |
| BOJYAD   | 170.098 | 2.582            | KENJUK   | 169.627 | 2.326            | JAKPAN   | 169.103 | 3.978            |
| NOBYIO   | 170.096 | 4.319            | DOHJES   | 169.586 | 4.253            | YOCKUW   | 169.078 | 3.818            |
| MULMOX   | 170.07  | 4.333            | FIZWAO   | 169.586 | 3.618            | OKUXUQ   | 169.068 | 3.806            |
| RUHWIA   | 170.065 | 3.921            | VOWXUC   | 169.572 | 4.064            | MIKBUE   | 169.057 | 3.772            |
| YIKGIL   | 170.051 | 3.477            | VAXBAY   | 169.569 | 3.159            | ZZZDVY04 | 169.057 | 3.565            |
| GETNUS01 | 169.999 | 3.609            | XASCUQ   | 169.556 | 4.236            | YOCKUW   | 169.054 | 3.815            |
| FIQRUT   | 169.998 | 4.294            | RAHGUG   | 169.539 | 4.384            | GICTAN   | 169.043 | 3.938            |
| DAWQIE   | 169.988 | 3.674            | PERZAN   | 169.536 | 4.256            | EYERAB   | 169.037 | 4.364            |
| WEKMAC   | 169.986 | 4.007            | SOPNOB   | 169.509 | 3.695            | WETFIN   | 169.008 | 3.638            |
| XUSGAW   | 169.98  | 3.232            | RUWMED   | 169.487 | 3.599            | ADEVOV   | 168.995 | 4.395            |
| ERIRAZ   | 169.979 | 4.37             | DAKZEY01 | 169.477 | 4.139            | NOKDIA   | 168.994 | 4.278            |

| Refcodes | ∠YZnO   | d <sub>ZnO</sub> | Refcodes | ∠YZnO   | d <sub>ZnO</sub> | Refcodes | ∠YZnO   | d <sub>ZnO</sub> |
|----------|---------|------------------|----------|---------|------------------|----------|---------|------------------|
| WEZJAN   | 169.968 | 3.751            | DAJCIE   | 169.443 | 3.941            | DAKZEY01 | 168.987 | 4.158            |
| NAHGIO   | 169.965 | 4.059            | FEDYAQ   | 169.425 | 4.359            | HUVHUD   | 168.962 | 4.275            |
| DAKZEY01 | 169.934 | 4.187            | NIJTIJ   | 169.415 | 4.178            | ADIZAP   | 168.957 | 3.469            |
| NIQLAC   | 169.925 | 3.965            | RUWMON   | 169.413 | 3.937            | GOJWIM   | 168.943 | 3.805            |
| KALJEN   | 169.911 | 2.772            | PUDBAT   | 169.411 | 4.199            | SUWBOC   | 168.94  | 4.063            |
| HAZZEP   | 169.911 | 3.933            | XEQNIR   | 169.395 | 3.284            | IGUDEV   | 168.935 | 4.054            |
| XUXPAI   | 169.91  | 3.66             | VEZYOR   | 169.395 | 4.205            | DANNOY   | 168.932 | 4.236            |
| VUQXUD   | 169.907 | 4.021            | CISMAU   | 169.391 | 4.134            | XOLQOE   | 168.931 | 3.612            |
| ASUXUJ   | 169.905 | 3.954            | MEGNUK   | 169.357 | 4.37             | MARDAN   | 168.921 | 4.042            |
| DAMSUH   | 169.895 | 3.5              | EFUJIA   | 169.349 | 3.416            | FIYSAI   | 168.912 | 3.898            |
| CIYJOK   | 168.908 | 3.608            | DASQAQ   | 168.464 | 3.482            | CEZWIO   | 168.079 | 3.808            |
| FEXBOD   | 168.894 | 3.588            | IHITUR   | 168.462 | 4.294            | FAHMOS   | 168.076 | 4.335            |
| VAZZII   | 168.891 | 4.231            | CUBWIG   | 168.451 | 3.858            | FAVHIU   | 168.073 | 3.991            |
| KIZGIL   | 168.867 | 2.699            | XOLQIY   | 168.449 | 4.312            | FEQVEE   | 168.07  | 4.097            |
| RAFWUS   | 168.846 | 2.705            | HONJOM   | 168.445 | 3.744            | UZAFOR   | 168.065 | 4.383            |
| SARXAO   | 168.826 | 3.776            | AVIMOI   | 168.44  | 4.378            | QUSVEF   | 168.051 | 3.735            |
| XAGNEZ   | 168.824 | 3.594            | FAVQOK   | 168.437 | 4.127            | HOXTUL   | 168.049 | 3.749            |
| WUJRUP   | 168.812 | 4.112            | LIDWAA   | 168.436 | 4.268            | OFURAK   | 168.024 | 4.261            |
| LEVDUL   | 168.808 | 3.753            | ZUBZEB   | 168.405 | 3.562            | COCPUI   | 168.013 | 3.746            |
| OJUHOQ01 | 168.806 | 4.074            | VENTOB   | 168.397 | 4.173            | DEKXUP   | 167.998 | 4.164            |
| XIJKAC   | 168.795 | 4.408            | PUKTUM   | 168.386 | 4.061            | GOCNET   | 167.986 | 3.91             |
| NOBHIX   | 168.792 | 4.219            | ATOGOF   | 168.381 | 4.344            | VICXEK   | 167.984 | 4.162            |
| PAKVOM   | 168.77  | 3.804            | JETVUC   | 168.373 | 2.528            | MIYYEA   | 167.978 | 3.059            |
| NUPRUL   | 168.767 | 4.142            | FOVGAZ   | 168.366 | 4.304            | XOVVOU   | 167.978 | 3.963            |
| FEQVEE   | 168.737 | 4.136            | HICLOV   | 168.362 | 3.125            | ZZZDVY03 | 167.97  | 3.374            |
| HEFRES   | 168.73  | 4.311            | IWORET   | 168.36  | 4.27             | USITIA   | 167.946 | 4.085            |
| CEPJUE   | 168.72  | 4.039            | QORLAK   | 168.359 | 4.311            | MAPLIA   | 167.929 | 4.197            |
| ISEMEZ   | 168.688 | 4.345            | MAPLIA   | 168.347 | 4.098            | CUZJEM   | 167.928 | 4.363            |
| MULQOA   | 168.679 | 4.393            | RUNVAY   | 168.344 | 3.889            | GUGYIT   | 167.92  | 3.917            |
| AHINIP   | 168.677 | 4.188            | AGUPUO   | 168.319 | 4.283            | WUWROY   | 167.906 | 3.199            |
| EMEZOM   | 168.675 | 3.988            | FASWED01 | 168.319 | 3.937            | COSBIW   | 167.889 | 2.759            |
| XEHFIC   | 168.669 | 4.024            | POGJAW   | 168.314 | 4.381            | LIHYEI   | 167.885 | 3.457            |
| XUHMOE   | 168.666 | 3.508            | DUCLUL   | 168.312 | 4.055            | KOQBUQ   | 167.882 | 3.284            |
| YEJGOL   | 168.666 | 4.134            | YEYVEH   | 168.305 | 3.366            | LIYDUS   | 167.871 | 3.317            |
| RAXSIU   | 168.661 | 4.284            | UGOQUE   | 168.302 | 4.393            | ZEHMAE   | 167.855 | 3.767            |
| IDEHAC   | 168.659 | 4.194            | UTAPIQ   | 168.299 | 4.082            | MEMXAD   | 167.852 | 4.128            |
| VEXTUP   | 168.657 | 3.531            | GURLUB   | 168.296 | 4.409            | UKEHOJ   | 167.845 | 3.846            |
| MAKCIM   | 168.639 | 4.209            | OJUHOQ   | 168.289 | 4.057            | DANNOY   | 167.837 | 4.305            |
| OKUXUQ   | 168.63  | 3.773            | SEZMIW   | 168.287 | 3.197            | MOJKAY   | 167.833 | 4.099            |
| WIBHAS   | 168.629 | 2.722            | ITIZES   | 168.285 | 4.254            | MUZNUS   | 167.827 | 3.9              |
| ZUGVEC   | 168.619 | 4.22             | SEBBAF   | 168.281 | 3.774            | URISOG   | 167.805 | 3.821            |
| AREGOT   | 168.595 | 3.716            | KENJUK   | 168.276 | 2.362            | NAGZIF   | 167.77  | 4.206            |
| ICUFUI   | 168.592 | 4.082            | KEKXAB   | 168.261 | 4.25             | AWUCUQ   | 167.76  | 3.706            |
| DIPCIK   | 168.592 | 3.96             | FAHMOS   | 168.24  | 2.304            | ZZZDVY02 | 167.752 | 3.455            |
| TAZJAH   | 168.585 | 4.106            | EYKAX    | 168.232 | 4.364            | DEKGAD   | 167.743 | 3.717            |
| ZACKAP   | 168.572 | 4.304            | WURBEQ   | 168.212 | 4.069            | XUXPAI   | 167.738 | 4.234            |
| ZUDRUN   | 168.57  | 3.165            | OHUQAJ   | 168.189 | 3.709            | LOZDOV   | 167.736 | 3.985            |
| VOWXUC   | 168.563 | 3.759            | JIXXUK   | 168.178 | 4.054            | NAGZEB   | 167.713 | 4.107            |
| FAYDAN   | 168.544 | 4.195            | QIXWUR   | 168.177 | 4.034            | XAXBOP   | 167.698 | 4.349            |
| LUMLOW   | 168.531 | 3.842            | RUZTEL   | 168.155 | 3.41             | OQEZER   | 167.689 | 4.075            |
| YIBCAR   | 168.529 | 4.328            | WAZDUY   | 168.149 | 4.263            | KUPHEL   | 167.688 | 4.315            |
| URIRIX   | 168.526 | 4.084            | NOPCUQ   | 168.147 | 3.789            | ARIMUK   | 167.679 | 3.804            |
| QAYGAY   | 168.522 | 2.987            | TAQTOV   | 168.141 | 3.167            | EHAMEH   | 167.67  | 3.145            |
| KOHBEP   | 168.517 | 4.048            | NEYBID   | 168.106 | 4.179            | QIBYUZ   | 167.662 | 3.427            |
| ZOCFAB   | 168.517 | 3.733            | HOTYUM   | 168.103 | 4.267            | OHUTOC   | 167.661 | 3.797            |
| ZAZPEV   | 168.503 | 3.56             | UQEVOE   | 168.099 | 3.627            | QOFKIF   | 167.647 | 3.782            |
| XIQFIO   | 168.499 | 3.767            | VIVNOF   | 168.098 | 4.373            | NAHGOU   | 167.643 | 4.155            |
| OXPAZN   | 168.476 | 4.368            | AVOMOO   | 168.083 | 4.179            | LOQLAF   | 167.641 | 3.966            |
| ICUDOAA  | 168.468 | 4.08             | QAYNAF   | 168.079 | 3.806            | JAVCEP   | 167.633 | 4.322            |

| Refcodes | ∠YZnO   | d <sub>ZnO</sub> | Refcodes | ∠YZnO   | d <sub>ZnO</sub> | Refcodes | ∠YZnO   | d <sub>ZnO</sub> |
|----------|---------|------------------|----------|---------|------------------|----------|---------|------------------|
| NABMAF   | 167.623 | 4.019            | MOJKAY   | 167.196 | 3.9              | EQOVEL   | 166.847 | 3.766            |
| RISRER   | 167.616 | 3.422            | NIQLAC   | 167.196 | 4.344            | IPOWUF   | 166.843 | 4.1              |
| TAZJAH   | 167.582 | 4.265            | SEZMIW   | 167.193 | 4.358            | YISKOE   | 166.811 | 4.263            |
| DELTIY01 | 167.581 | 3.617            | ZINWUO   | 167.18  | 4.367            | ZAJKOO   | 166.783 | 3.809            |
| LAVWIO   | 167.58  | 4.22             | ZINWUO10 | 167.18  | 4.367            | GLYZNS10 | 166.771 | 4.306            |
| DEHPOX   | 167.573 | 3.891            | FAKHOQ   | 167.174 | 4.365            | XOQZEJ   | 166.769 | 4.272            |
| MIKBOY   | 167.566 | 4.242            | LIRNOR   | 167.17  | 4.247            | TEHROO   | 166.768 | 4.251            |
| KEMKIX   | 167.559 | 3.866            | VICCOD   | 167.168 | 2.982            | DOSTUB   | 166.74  | 3.813            |
| GUGYUF   | 167.547 | 3.967            | QUSVEF   | 167.167 | 3.954            | NEPPAZ   | 166.735 | 3.983            |
| ZEQLEO   | 167.526 | 3.95             | JISMEG   | 167.155 | 4.256            | CECGID   | 166.731 | 4.351            |
| IQUDAA   | 167.523 | 3.074            | MOSPAL   | 167.142 | 4.133            | RUQSOL   | 166.728 | 3.546            |
| COCQIX   | 167.513 | 3.837            | KUFLON   | 167.136 | 3.352            | FUJNEF   | 166.717 | 3.998            |
| VIVDUB   | 167.51  | 3.952            | KEMKIX   | 167.116 | 3.721            | CUBFAH   | 166.695 | 3.923            |
| YUVWOB   | 167.51  | 3.389            | NAHGIO   | 167.111 | 4.133            | NIDMOD   | 166.694 | 2.895            |
| CESKUK   | 167.497 | 3.999            | XALXOX   | 167.098 | 3.741            | RAHGUG   | 166.69  | 4.213            |
| LUMLOW   | 167.476 | 3.88             | JEMXUX   | 167.097 | 4.379            | LELSII   | 166.686 | 4.052            |
| CEZVIO   | 167.473 | 3.14             | DOYBOJ   | 167.081 | 4.292            | ULEXER   | 166.673 | 4.193            |
| GIZFUT   | 167.473 | 4.132            | KAMLER   | 167.075 | 3.533            | LOJFAT   | 166.662 | 3.8              |
| IBUWIN   | 167.458 | 3.802            | ZASQAP   | 167.074 | 4.256            | WEXFIQ   | 166.659 | 3.852            |
| MARDAN   | 167.449 | 3.502            | IPIJEY   | 167.063 | 4.123            | RAHGUG   | 166.657 | 4.314            |
| ZIQFUD   | 167.446 | 4.105            | QIDQUT   | 167.062 | 3.959            | DIPCEN   | 166.651 | 4.124            |
| TUFHAE   | 167.436 | 3.423            | HIKKOC   | 167.039 | 3                | CEWBUC   | 166.646 | 4.012            |
| MUWHIX   | 167.421 | 4.365            | FIDFUU   | 167.039 | 2.655            | IZUROM   | 166.638 | 3.966            |
| BABBEM   | 167.409 | 3.111            | WUPTAI   | 167.03  | 3.938            | FAKXAT   | 166.635 | 3.759            |
| ITUBOP   | 167.402 | 3.464            | DAWQIE   | 167.023 | 3.982            | ERIKOG   | 166.632 | 4.155            |
| EDUBEM01 | 167.395 | 4.065            | EYERAB   | 167.019 | 3.782            | TAZJAH   | 166.626 | 4.401            |
| NEMVAD   | 167.383 | 3.87             | FIZWAO   | 167.017 | 4.033            | YIBNAA   | 166.625 | 3.21             |
| HECHAC   | 167.382 | 3.514            | IPOWUF   | 167     | 4.336            | ROBCEQ   | 166.61  | 4.32             |
| BASZUU   | 167.371 | 3.875            | LONRAK   | 166.992 | 4.355            | IGUDUK   | 166.597 | 3.813            |
| WUPTAE   | 167.366 | 4.076            | NAWTEO   | 166.979 | 4.24             | NEVHOL   | 166.58  | 3.33             |
| EDUBEM   | 167.365 | 4.097            | KITZOD   | 166.971 | 3.218            | MEMPAV   | 166.577 | 3.409            |
| PATDEW   | 167.358 | 4.323            | MIKCEP   | 166.967 | 4.154            | AXOTEP   | 166.57  | 3.826            |
| NECZUR   | 167.356 | 4.103            | MAFKUA   | 166.961 | 4.26             | VONCOR   | 166.563 | 3.755            |
| LUBPEG   | 167.339 | 4.306            | YELHAB   | 166.957 | 4.264            | NUKTOD   | 166.545 | 4.011            |
| WUPTAE   | 167.324 | 4.216            | DOHPAT   | 166.943 | 3.512            | TUGCIJ   | 166.534 | 3.988            |
| RUZTOV   | 167.318 | 3.495            | WACRUR   | 166.942 | 3.838            | LEZNEL   | 166.517 | 3.64             |
| CIBYAO   | 167.315 | 3.739            | FODNAQ   | 166.938 | 4.161            | KUBQOP   | 166.509 | 4.164            |
| KEMKIX   | 167.302 | 3.78             | NEPPED   | 166.932 | 4.032            | GETPEE   | 166.489 | 4.221            |
| LIWXEV   | 167.298 | 3.074            | JEMYAE   | 166.905 | 4.38             | EDUBEM01 | 166.477 | 3.786            |
| GURPUG   | 167.294 | 4.085            | KENJEU   | 166.904 | 3.909            | CEVYIM   | 166.474 | 4.19             |
| MIKCEP   | 167.29  | 4.287            | VEHLUQ   | 166.891 | 3.835            | XUGBOR   | 166.472 | 4.396            |
| VIRLAK   | 167.264 | 3.59             | VIRLAK   | 166.888 | 3.56             | GOCMUI   | 166.45  | 4.105            |
| OKUXUQ   | 167.264 | 3.864            | ZIPCUW   | 166.888 | 3.831            | KIMWUA   | 166.45  | 3.821            |
| POCXOW   | 167.259 | 4.23             | QEVSOC   | 166.885 | 3.985            | XEJKIJ   | 166.445 | 4.161            |
| QEXMEO   | 167.236 | 3.901            | NACZEW   | 166.877 | 3.655            | VONCOR   | 166.445 | 3.646            |
| RUWMUT   | 167.228 | 3.53             | QAFHEN   | 166.876 | 4.303            | UJISAI   | 166.443 | 3.809            |
| VEZYOR   | 167.202 | 3.905            | WUWRUE   | 166.87  | 3.211            | TUFHAE   | 166.443 | 3.625            |
| RUWMED   | 167.202 | 3.651            | DASQAQ   | 166.868 | 3.844            | ADIZAP   | 166.433 | 4.368            |
| HAGQOV   | 167.196 | 3.708            | MUZROP   | 166.847 | 3.765            | RERKUW   | 166.429 | 3.918            |
| AQEYOK   | 166.425 | 2.955            | DAYZIO   | 165.954 | 3.908            | IJUXUG   | 165.551 | 4.293            |
| YEQRES   | 166.422 | 4.233            | OYOWIL   | 165.95  | 3.947            | ZUJLEX   | 165.548 | 2.755            |
| KUFLIH   | 166.406 | 3.363            | GAMFUW   | 165.948 | 4.165            | OGUBAV   | 165.54  | 3.214            |
| JAQZOT   | 166.389 | 4.034            | KARDEM   | 165.948 | 4.268            | RALZUD   | 165.538 | 4.057            |
| ISODUP   | 166.388 | 3.25             | SOPWIF   | 165.935 | 4.227            | GARWIH   | 165.535 | 4.005            |
| RUDMUZ   | 166.382 | 3.909            | QORLEO   | 165.928 | 4.13             | MEWWET   | 165.522 | 4.06             |
| FUMXIX   | 166.378 | 3.472            | GEYRIO   | 165.924 | 3.851            | MUZHAR   | 165.508 | 4.184            |
| SOPNOB   | 166.371 | 3.712            | JULDEZ   | 165.915 | 3.736            | AFUJAM   | 165.506 | 3.723            |
| ADONIQ   | 166.369 | 3.98             | NIFLEV   | 165.911 | 4.362            | ZAXREX   | 165.496 | 3.679            |
| CEVYIM01 | 166.36  | 4.182            | XIDBOF   | 165.894 | 4.138            | JAJPIU   | 165.494 | 4.015            |

| Refcodes | $\angle YZnO$ | $d_{ZnO}$ | Refcodes | $\angle YZnO$ | $d_{ZnO}$ | Refcodes | $\angle YZnO$ | $d_{ZnO}$ |
|----------|---------------|-----------|----------|---------------|-----------|----------|---------------|-----------|
| MUDFEW   | 166.358       | 4.107     | LUPPEU   | 165.891       | 3.978     | DEHFIH   | 165.491       | 4.196     |
| TEWDEF   | 166.348       | 4.184     | XAFSEF   | 165.888       | 3.574     | PURVAB   | 165.479       | 4.085     |
| YENSEQ   | 166.34        | 2.543     | HUCHOD   | 165.874       | 3.239     | NUDNIL   | 165.454       | 3.47      |
| KAKSOI   | 166.339       | 3.279     | DUSVUK   | 165.873       | 4.382     | IJUGOJ   | 165.452       | 3.768     |
| SEBBAF   | 166.334       | 3.604     | MODHOD   | 165.872       | 4.335     | ZAXREX   | 165.449       | 3.815     |
| MOMQUC   | 166.306       | 3.114     | WEMNIN   | 165.867       | 4.371     | DUBMUL   | 165.447       | 4.084     |
| CEPBOR   | 166.305       | 4.35      | XUXQAJ   | 165.839       | 3.684     | PIRFOL   | 165.444       | 3.186     |
| ARINAR   | 166.285       | 3.684     | TESNUC   | 165.836       | 4.353     | CARVAW   | 165.436       | 4.115     |
| HAQJOB   | 166.282       | 3.855     | RUWMUT   | 165.836       | 3.395     | PIRFOL01 | 165.421       | 3.186     |
| WIWBUA   | 166.274       | 3.721     | RICNAU   | 165.835       | 4.387     | GUQLUA   | 165.414       | 4.261     |
| GUHHIC   | 166.268       | 3.856     | OKUXUQ   | 165.813       | 3.816     | ZAFKEZ   | 165.383       | 3.435     |
| IKELUG   | 166.263       | 4.081     | YEHDAT   | 165.808       | 3.91      | OFUGAY   | 165.369       | 4.402     |
| EDUBEM   | 166.249       | 3.791     | MARDAN   | 165.808       | 3.953     | KUFLUT   | 165.359       | 3.411     |
| SOBNIJ   | 166.247       | 3.695     | FAKTIY   | 165.805       | 4.022     | DIPCOX   | 165.338       | 3.634     |
| QEXVOH   | 166.244       | 4.095     | NEPPUT   | 165.801       | 3.873     | MARDAN   | 165.333       | 3.973     |
| FASWED   | 166.226       | 3.962     | FITNIH   | 165.794       | 4.005     | CAYWIK   | 165.333       | 3.098     |
| MULBAX   | 166.215       | 4.135     | XOHNEO   | 165.791       | 4.157     | VAJHIA   | 165.329       | 4.195     |
| YEQRES   | 166.214       | 3.267     | JULDEZ01 | 165.755       | 3.739     | SUZGOM   | 165.327       | 3.592     |
| NEPPAZ   | 166.213       | 3.713     | XERKIR   | 165.753       | 4.059     | QARSIL01 | 165.319       | 3.185     |
| FUMXET   | 166.187       | 3.475     | ZUDHAH   | 165.72        | 3.883     | QIDXEH   | 165.317       | 3.825     |
| DUFKAT   | 166.168       | 4.109     | CUBYIJ   | 165.711       | 3.599     | KERGOE   | 165.308       | 3.745     |
| FUMXOD   | 166.159       | 3.479     | JEXQEJ   | 165.706       | 3.515     | VIVNOF   | 165.307       | 4.381     |
| NEKXOU   | 166.148       | 3.814     | NAKPUM   | 165.697       | 2.616     | MAYNIM   | 165.305       | 4.304     |
| RIZREY   | 166.136       | 3.652     | FIKNIX   | 165.688       | 4.323     | ROBCEQ   | 165.291       | 4.298     |
| DAJCIE   | 166.133       | 4.171     | INEPIC   | 165.684       | 4.394     | VIBJEW   | 165.272       | 4.186     |
| HUTYAZ   | 166.11        | 4.184     | XELLIK   | 165.67        | 4.031     | IKELUG   | 165.266       | 3.981     |
| MIKHEV   | 166.094       | 3.888     | TIRHEJ   | 165.668       | 4.347     | WIRHUD   | 165.253       | 4.39      |
| PEJWUX   | 166.068       | 4.062     | XULZIQ   | 165.665       | 3.707     | IPUKIQ   | 165.248       | 4.1       |
| NAHGUA   | 166.064       | 4.242     | ROBCEQ   | 165.664       | 4.228     | PETFON   | 165.238       | 3.721     |
| UJEYIT   | 166.056       | 3.115     | RUZVAJ   | 165.662       | 2.985     | WISZUT01 | 165.237       | 3.933     |
| AGOKAK   | 166.053       | 3.774     | LAFXUP   | 165.65        | 3.029     | IFAHEC   | 165.235       | 3.54      |
| FEJZON   | 166.044       | 3.925     | RUZVIR   | 165.641       | 3.426     | UDOMIK   | 165.233       | 4.069     |
| NIQLAC   | 166.034       | 3.964     | GEVFAR   | 165.59        | 4.295     | SEHDUG   | 165.23        | 4.111     |
| HOQQEK   | 166.031       | 4.172     | IJUXUG01 | 165.587       | 4.271     | KEKXAB   | 165.228       | 4.097     |
| KICVAU   | 166.019       | 3.976     | BONNOI   | 165.585       | 3.958     | ESISIK   | 165.213       | 3.988     |
| WALCET   | 165.998       | 4.093     | WIGLAA   | 165.582       | 4.244     | YEJNUA   | 165.203       | 4.011     |
| GIKRIF   | 165.99        | 4.148     | QORJIQ   | 165.577       | 4.145     | ASALIP   | 165.195       | 4.165     |
| GAMFUW01 | 165.983       | 4.168     | WUXVOB   | 165.564       | 4.01      | TARROW   | 165.188       | 4.31      |
| ZZZDVY04 | 165.969       | 3.426     | QAKKUJ   | 165.555       | 3.975     | VIIYJQ   | 165.184       | 3.709     |
| UGADIP   | 165.183       | 2.928     | WUCGOQ   | 164.812       | 3.918     | JIVNAH01 | 164.47        | 4.01      |
| NOPNIS   | 165.179       | 3.921     | DIPCUD   | 164.81        | 3.718     | TIRTAQ   | 164.464       | 4.185     |
| MIBJAK   | 165.174       | 4.038     | GUCZAG   | 164.792       | 4.065     | FAWLAS   | 164.46        | 4.362     |
| ZEJXOE   | 165.149       | 4.097     | SARCIA   | 164.791       | 3.698     | JULDEZ   | 164.454       | 4.381     |
| MEYSES   | 165.129       | 4.31      | OHAHEL   | 164.786       | 4.286     | CEFLAD   | 164.451       | 3.859     |
| DIPCAJ   | 165.123       | 3.76      | TALZEM   | 164.781       | 4.055     | MASYAH   | 164.448       | 4.342     |
| HICLOV   | 165.122       | 3.549     | WEZNUM   | 164.768       | 2.747     | QOFKIF   | 164.439       | 3.905     |
| WISZUT   | 165.121       | 3.96      | ZUBZAX   | 164.763       | 3.564     | FOWQEQ   | 164.412       | 4.211     |
| HIBMEM   | 165.115       | 3.698     | MOJKAY   | 164.745       | 4.003     | YELHAB   | 164.394       | 3.748     |
| WAVDAY   | 165.106       | 4.393     | SUWTUC   | 164.735       | 4.067     | ZAZKIU   | 164.386       | 4.137     |
| CAKSEO   | 165.075       | 3.985     | JISJUT   | 164.731       | 3.708     | SUVPEH   | 164.378       | 4.288     |
| ALUXEM   | 165.074       | 4.036     | HIBMEM   | 164.728       | 4.306     | KIBZEB   | 164.371       | 4.392     |
| NAHJEN   | 165.067       | 4.326     | KARXIL   | 164.726       | 4.388     | IMEFOV   | 164.37        | 4.011     |
| MATNIF   | 165.053       | 4.222     | QOMFEF   | 164.711       | 3.856     | MOKYAO   | 164.37        | 4.232     |
| MOJKAY   | 165.052       | 3.885     | VARRUD   | 164.708       | 4.177     | KOZJUH   | 164.367       | 3.076     |
| KOQJIL   | 165.051       | 3.605     | ZAQVEW   | 164.705       | 3.779     | NETLOR   | 164.348       | 4.327     |
| YEYFIT   | 165.049       | 3.788     | QORKIR   | 164.7         | 3.768     | WUCGOQ   | 164.343       | 3.842     |
| FUJBIX   | 165.042       | 4.19      | QAVBIA   | 164.692       | 3.904     | BINKUI   | 164.314       | 3.391     |
| OBUNEI   | 165.034       | 3.946     | DICDIG   | 164.687       | 4.18      | GUGZAM   | 164.31        | 3.984     |
| KAPWUV   | 165.029       | 2.698     | LAYTAJ   | 164.68        | 4.2       | XIDDUL   | 164.309       | 3.929     |

| Refcodes | ∠YZnO   | d <sub>ZnO</sub> | Refcodes | ∠YZnO   | d <sub>ZnO</sub> | Refcodes | ∠YZnO   | d <sub>ZnO</sub> |
|----------|---------|------------------|----------|---------|------------------|----------|---------|------------------|
| ZAHSUZ   | 165.029 | 4.283            | NUDNIL   | 164.678 | 4.326            | GUQLUA   | 164.302 | 3.745            |
| NAGZIF   | 165.012 | 4.082            | QIDXIL   | 164.677 | 3.897            | DAXXAE   | 164.298 | 4.326            |
| ETUXUM   | 165.012 | 4.307            | CUVNAK   | 164.674 | 3.984            | AQUHIG   | 164.293 | 3.777            |
| MIKCEP   | 165.006 | 4.103            | UNIQEO   | 164.673 | 3.762            | XAVKEN   | 164.286 | 3.577            |
| IXOXAV   | 165     | 3.881            | LOSLEK   | 164.67  | 4.406            | RAJDOX   | 164.282 | 3.773            |
| KUFMAA   | 164.997 | 3.424            | ROBCEQ   | 164.647 | 4.245            | AZUCIH   | 164.272 | 3.799            |
| XEJFIC   | 164.988 | 4.071            | FUZYEH   | 164.634 | 4.201            | ARIGEQ   | 164.271 | 3.911            |
| NENJIB01 | 164.988 | 4.14             | CABPEE   | 164.617 | 4.158            | MIWJOU   | 164.251 | 3.781            |
| NENJIB   | 164.982 | 4.169            | XIZZOV   | 164.598 | 4.382            | WIBTUW   | 164.251 | 3.831            |
| DUVHOT   | 164.975 | 3.995            | IJEDOR   | 164.591 | 4.03             | MOFWUA   | 164.246 | 4.143            |
| MEYSIW   | 164.971 | 4.311            | VAJLID   | 164.588 | 2.623            | FASXII   | 164.23  | 3.442            |
| SARCIA   | 164.967 | 3.89             | QORFEI   | 164.584 | 3.669            | COCQET   | 164.228 | 3.718            |
| WAMXEQ   | 164.961 | 3.821            | TIQBEB   | 164.58  | 4.394            | BOVNIK   | 164.224 | 2.772            |
| KOMRAH   | 164.952 | 4.194            | ETUXAT   | 164.558 | 3.892            | VUWCIA   | 164.223 | 3.095            |
| LECWEX   | 164.941 | 3.772            | LUMLOW   | 164.534 | 3.962            | AQUHIG   | 164.216 | 3.984            |
| VENMIL   | 164.938 | 3.481            | ZIWROP   | 164.532 | 3.805            | APEBAZ   | 164.187 | 3.876            |
| JOMGOK   | 164.927 | 4.026            | MOJKAY   | 164.531 | 4.019            | XUXPAI   | 164.142 | 4.2              |
| ZACKAP   | 164.927 | 4.157            | JIWPAJ   | 164.53  | 3.949            | WUPTAE   | 164.136 | 4.143            |
| FEXPOP   | 164.926 | 4.246            | DILBIK   | 164.528 | 4.37             | JETXIT   | 164.132 | 4.165            |
| UNIPUD   | 164.925 | 4.321            | DASPUJ   | 164.525 | 3.949            | XOHNEO   | 164.119 | 4.192            |
| MEYSOC   | 164.91  | 4.317            | AZOHEC   | 164.523 | 4.053            | WUPTAE   | 164.119 | 4.175            |
| GOTLIM   | 164.9   | 3.493            | YUZQIV   | 164.499 | 3.286            | KUBQOP   | 164.107 | 4.357            |
| TEJFIA   | 164.898 | 2.664            | JIVNAH   | 164.498 | 4.011            | KIBZIF   | 164.095 | 4.229            |
| TUXMIL   | 164.89  | 4.268            | XIKWEU   | 164.491 | 3.799            | BIQBUB   | 164.092 | 4.308            |
| CUKMEB   | 164.883 | 4.156            | RUZVIR   | 164.483 | 3.706            | QAWLOT   | 164.089 | 4.083            |
| QAMHUK   | 164.872 | 3.943            | RAVKIL   | 164.483 | 3.884            | MOJKAY   | 164.086 | 3.767            |
| FODZAA   | 164.85  | 3.438            | YISKOE   | 164.48  | 4.35             | LASMEZ   | 164.086 | 4.228            |
| YEYVEH   | 164.836 | 3.477            | LAKPIY   | 164.478 | 3.787            | YACYUX   | 164.079 | 4.254            |
| HOCCIO   | 164.828 | 3.663            | IBONOD   | 164.471 | 2.936            | UVIKES   | 164.078 | 2.585            |
| PEVJIK   | 164.074 | 4.215            | DINDIP   | 163.747 | 4.193            | NAFHAE   | 163.468 | 3.43             |
| HUQWEW   | 164.068 | 4.211            | TUYGAX01 | 163.745 | 4.19             | KILYAJ   | 163.467 | 4.024            |
| BIPGIT   | 164.067 | 3.44             | RUZVIR   | 163.735 | 3.667            | YAKPAD01 | 163.462 | 4.313            |
| OKUXUQ   | 164.062 | 3.925            | WARDUP   | 163.732 | 3.894            | OHUYIB   | 163.441 | 4.077            |
| SOGNAG   | 164.06  | 4.286            | SEKMIH01 | 163.732 | 4.328            | EFASUA   | 163.433 | 3.728            |
| XEJKAB   | 164.05  | 2.987            | XUHMOE   | 163.729 | 3.226            | REJYS01  | 163.424 | 4.032            |
| EPEYII   | 164.047 | 4.379            | USITOG   | 163.711 | 4.143            | RALZUD   | 163.42  | 3.855            |
| RIWZUW   | 164.042 | 4.305            | NEPPON   | 163.701 | 4.08             | FUGFET   | 163.419 | 3.931            |
| DEZYAL   | 164.037 | 4.03             | AVOMII   | 163.7   | 4.169            | CIHUU    | 163.414 | 4.394            |
| ASUXIX   | 164.03  | 4.391            | EXIVUC   | 163.694 | 3.572            | YEJNIO   | 163.403 | 4.059            |
| ASALIP   | 164.028 | 3.819            | IQERAA   | 163.675 | 2.997            | QEPROW   | 163.396 | 3.912            |
| KUFMEE   | 164.027 | 3.468            | KUFMII   | 163.674 | 3.511            | PEFHAN   | 163.393 | 4.21             |
| MATVAG   | 164.024 | 3.902            | HEHKOU   | 163.672 | 3.875            | VIRLAK   | 163.392 | 3.306            |
| QOMFEF   | 164.009 | 3.917            | HEHKOU10 | 163.672 | 3.875            | DEKCEF   | 163.382 | 4.043            |
| GEVFAR   | 164     | 4.124            | KEYLEG   | 163.666 | 3.795            | IBIDAY   | 163.365 | 3.699            |
| RESSUH   | 163.996 | 3.022            | NIDDEK   | 163.664 | 3.829            | QEPRUC   | 163.355 | 3.861            |
| FERFIU   | 163.968 | 3.717            | COCPUI   | 163.655 | 3.486            | XECTEG   | 163.354 | 4.013            |
| PICBAE   | 163.967 | 3.085            | NAWTEO   | 163.63  | 3.679            | JUFEO    | 163.353 | 3.504            |
| QAKKOD   | 163.966 | 3.874            | WIGLAA   | 163.629 | 4.133            | YELFIH   | 163.335 | 3.992            |
| VIRXAX   | 163.964 | 3.815            | FOZGOT   | 163.626 | 4.267            | PUHWEW   | 163.33  | 4.003            |
| COCQAP   | 163.962 | 4.034            | WASFIF   | 163.608 | 4.178            | TEJFIA   | 163.33  | 4.216            |
| KELTUR   | 163.943 | 3.186            | KEYZAQ   | 163.608 | 2.968            | CIWBUH   | 163.326 | 3.753            |
| HIXJUW   | 163.932 | 4.231            | OHIMUQ01 | 163.602 | 4.147            | LUVBAH   | 163.319 | 4.22             |
| KATVOR   | 163.928 | 3.86             | KAMLER   | 163.595 | 4.193            | ROJQIS01 | 163.313 | 4.285            |
| NEPPON   | 163.926 | 3.939            | SUWBOC   | 163.59  | 3.727            | XIZZOV   | 163.312 | 3.717            |
| BASZUU   | 163.92  | 3.601            | QORJIQ   | 163.588 | 3.681            | DEBSUZ   | 163.312 | 3.107            |
| HEXGUO   | 163.915 | 4.209            | MOJKAY   | 163.578 | 3.971            | XELXAP   | 163.311 | 3.717            |
| CUBWIG   | 163.913 | 3.4              | YEJNIO   | 163.577 | 3.642            | VOJMEP   | 163.31  | 3.932            |
| SUSXUA   | 163.896 | 4.145            | FUZYEH   | 163.567 | 3.911            | YAKPAD   | 163.305 | 4.302            |
| VIRLAK   | 163.891 | 3.557            | LIDWAA   | 163.559 | 4.305            | KIBZAX   | 163.298 | 3.756            |



| Refcodes | ∠YZnO   | d <sub>ZnO</sub> | Refcodes | ∠YZnO   | d <sub>ZnO</sub> | Refcodes | ∠YZnO   | d <sub>ZnO</sub> |
|----------|---------|------------------|----------|---------|------------------|----------|---------|------------------|
| ENUBIA   | 163.868 | 4.091            | JESQAA01 | 163.555 | 3.159            | DUQZOH   | 163.296 | 4.275            |
| TUYGAX02 | 163.849 | 4.19             | FOCNET   | 163.551 | 3.941            | YIMWAU   | 163.288 | 4.212            |
| MARDAN   | 163.839 | 4.208            | ZUDHAH   | 163.548 | 3.752            | WUZNEN   | 163.288 | 4.233            |
| JULDEZ01 | 163.829 | 4.359            | JESQAA   | 163.547 | 3.159            | NEPPUT   | 163.28  | 4.109            |
| ITIZES   | 163.828 | 4.297            | GUQTOB   | 163.547 | 4.41             | EQOVEL   | 163.277 | 4.166            |
| ERIKOG   | 163.824 | 4.318            | IDESAP   | 163.547 | 3.759            | GAKDAX   | 163.264 | 3.897            |
| TUYGAX   | 163.821 | 4.184            | WIRCUX   | 163.545 | 4.313            | UYIBUB02 | 163.263 | 3.629            |
| MUZVUY   | 163.82  | 4.391            | MATNIF   | 163.535 | 3.922            | WEWPIB   | 163.259 | 3.793            |
| AWOPUY   | 163.809 | 4.086            | AFIRUD   | 163.534 | 4.113            | QIDRAA   | 163.259 | 4.338            |
| NUHBOI   | 163.802 | 3.035            | ALUXEM   | 163.53  | 3.998            | AMAZEV   | 163.258 | 4.331            |
| BEMHAG   | 163.799 | 3.803            | MOJKAY   | 163.527 | 4.07             | WUPTTEI  | 163.25  | 3.63             |
| XASDAX   | 163.799 | 4.06             | XOQZEJ   | 163.525 | 4.377            | GAKDAX   | 163.236 | 3.791            |
| QOXHAO   | 163.797 | 4.364            | IKELUG   | 163.519 | 3.936            | DEHPEN   | 163.235 | 3.821            |
| VICXEK   | 163.795 | 3.767            | VOWXIO   | 163.496 | 2.765            | IDUJAT   | 163.234 | 3.873            |
| PIKYEQ   | 163.784 | 4.375            | GARWIH   | 163.492 | 4.2              | BABBOW   | 163.228 | 3.169            |
| XASDAX   | 163.783 | 4.11             | ALELAG   | 163.487 | 4.309            | IKEREV02 | 163.224 | 3.349            |
| QIDREE   | 163.778 | 4.407            | VAVBUQ   | 163.483 | 4.162            | REGMAV   | 163.212 | 3.969            |
| MARDAN   | 163.761 | 3.553            | TUMREA   | 163.473 | 4.173            | REJYIS   | 163.208 | 4.029            |
| LIDWAA   | 163.752 | 2.68             | DEKGAD   | 163.47  | 4.307            | IPUKIQ   | 163.207 | 3.774            |
| XINTAS   | 163.186 | 3.916            | GUCQIH   | 162.799 | 4.234            | UHUHOV   | 162.518 | 3.781            |
| PEWDIG   | 163.182 | 4.23             | UZAFOR   | 162.799 | 4.309            | COSBIW   | 162.477 | 4.166            |
| XULZIQ   | 163.166 | 3.82             | UFANEU   | 162.789 | 3.662            | BEQPAQ   | 162.475 | 3.913            |
| QIDREE   | 163.158 | 4.26             | DOSVAJ   | 162.788 | 4.055            | WITCOR   | 162.474 | 4.245            |
| EZEJOL   | 163.142 | 4.409            | MARDAN   | 162.784 | 4.254            | FAWLAS   | 162.474 | 4.094            |
| MILRUY   | 163.132 | 3.811            | CUWNOA   | 162.762 | 4.258            | TILSUG   | 162.47  | 4.128            |
| ESARAT   | 163.121 | 3.759            | HABZIX   | 162.761 | 3.614            | EVUJUD   | 162.462 | 3.368            |
| NAGZEB   | 163.113 | 4.039            | SUWZOC   | 162.759 | 4.002            | CUWNOA   | 162.455 | 4.291            |
| ROJQIS   | 163.094 | 4.24             | LUVBAH   | 162.748 | 4.07             | WURBEQ   | 162.448 | 3.794            |
| FAXCUF   | 163.09  | 4.08             | DERTIH   | 162.744 | 4.008            | PXUTUZ   | 162.444 | 3.423            |
| WIGLAA   | 163.084 | 4.368            | BETWOO   | 162.728 | 4.378            | MOJKAY   | 162.441 | 4.093            |
| COCQIX   | 163.083 | 3.517            | VIBJEW   | 162.728 | 3.99             | MEZNIR   | 162.441 | 4.223            |
| RISRER   | 163.081 | 4.219            | VAZZII   | 162.72  | 4.344            | MIYMUC   | 162.428 | 4.347            |
| PUNQIZ   | 163.08  | 3.84             | ALELAG   | 162.699 | 3.3              | RUZVIR   | 162.423 | 3.709            |
| QIDRII   | 163.076 | 4.258            | XUGDEK   | 162.697 | 4.273            | DUGYOU   | 162.421 | 4.071            |
| NAZVOB   | 163.061 | 3.788            | UJISAI   | 162.696 | 3.887            | WIBTUW   | 162.415 | 3.974            |
| AGOTAS   | 163.048 | 4.173            | MARDAN   | 162.691 | 3.733            | XUQZAK   | 162.394 | 3.541            |
| NIXKEM   | 163.045 | 3.768            | QORJIQ   | 162.684 | 4.281            | OKUXUQ   | 162.391 | 3.916            |
| KILXUC   | 163.031 | 4.038            | AROGIA   | 162.681 | 3.146            | MIBSUM   | 162.38  | 3.69             |
| NUCRIN   | 163.023 | 4.248            | WALBOC   | 162.678 | 3.458            | XOQZEJ   | 162.375 | 4.164            |
| WIZMAT   | 163.02  | 3.113            | EKOBUC   | 162.677 | 4.032            | VISCIK   | 162.368 | 3.622            |
| ANOREB   | 163.01  | 3.825            | ECUQAV   | 162.672 | 3.761            | OHUYIB   | 162.366 | 3.951            |
| LEHMUK   | 163.001 | 4.177            | AZAQOJ   | 162.668 | 4.349            | BASZUU   | 162.345 | 4.108            |
| ZUDHAH   | 162.986 | 3.912            | FUMGOL   | 162.667 | 4.404            | MARDAN   | 162.343 | 4.179            |
| NUCRIN01 | 162.984 | 4.255            | DIPCEN   | 162.661 | 3.551            | QAYNAF   | 162.339 | 3.783            |
| CAKSEO   | 162.982 | 4.236            | FIHYIH   | 162.654 | 4.009            | FAVHIU   | 162.321 | 3.668            |
| RERKUW   | 162.93  | 3.9              | OGELEV   | 162.648 | 4.408            | SUWZOC   | 162.313 | 3.097            |
| JITGAV   | 162.921 | 4.407            | TEVHAG   | 162.643 | 3.472            | YAXNIX   | 162.306 | 3.548            |
| HAZYUE   | 162.918 | 4.403            | WALBOC01 | 162.634 | 3.55             | EPEYAA   | 162.292 | 4.142            |
| KARDEM   | 162.918 | 4.211            | CUHKUN   | 162.634 | 4.163            | IMEFOV   | 162.289 | 4.041            |
| EYERAB   | 162.913 | 2.949            | BASZUU   | 162.63  | 3.741            | QORKIR   | 162.285 | 4.248            |
| DUKBUH   | 162.912 | 4.018            | GIXDOH   | 162.626 | 4.399            | MOHRAD   | 162.273 | 4.006            |
| WALCET   | 162.899 | 3.672            | LASMEZ   | 162.615 | 3.802            | AMOYIL   | 162.252 | 3.137            |
| SESPIQ   | 162.892 | 3.95             | DIPCIR   | 162.613 | 3.535            | MIKBUE   | 162.244 | 4.215            |
| ELAMOW   | 162.887 | 4.197            | LABQIQ   | 162.598 | 3.992            | JOBPUL   | 162.238 | 3.962            |
| CISWOR   | 162.874 | 4.019            | QITDAA01 | 162.595 | 3.084            | GURPUG   | 162.238 | 3.795            |
| MEDROF   | 162.871 | 3.166            | NEWZIA   | 162.591 | 4.074            | VOFNIP   | 162.236 | 4.093            |
| QORJIQ   | 162.859 | 4.227            | KAKSIC   | 162.587 | 4.023            | EMAQUH   | 162.233 | 3.922            |
| WARCOJ   | 162.858 | 4.315            | GIZGAA   | 162.582 | 3.283            | RUDMUZ   | 162.226 | 2.798            |
| YEQRES   | 162.853 | 2.58             | LIDWAA   | 162.581 | 2.614            | LIMGOF   | 162.226 | 4.283            |

| Refcodes | ∠YZnO   | d <sub>ZnO</sub> | Refcodes | ∠YZnO   | d <sub>ZnO</sub> | Refcodes | ∠YZnO   | d <sub>ZnO</sub> |
|----------|---------|------------------|----------|---------|------------------|----------|---------|------------------|
| EYURUN   | 162.846 | 3.686            | XULZIQ   | 162.58  | 3.604            | QOMFEF   | 162.219 | 3.832            |
| MOJZUG   | 162.846 | 2.868            | XECFUI   | 162.577 | 4.208            | FELJAK   | 162.211 | 3.678            |
| VIBJIA   | 162.845 | 4.306            | LADSUH   | 162.574 | 4.28             | XEFDAQ   | 162.21  | 3.741            |
| YEQSOF   | 162.84  | 4.206            | DEHPEN   | 162.574 | 4.028            | NIPWIT   | 162.207 | 3.483            |
| WISZON   | 162.821 | 3.935            | VIRLAK   | 162.563 | 2.876            | FEXQAC   | 162.206 | 4.162            |
| MUJKEI   | 162.813 | 3.541            | PUWTOQ   | 162.559 | 3.991            | NIPWIT01 | 162.204 | 3.433            |
| PAPGUK   | 162.804 | 4.052            | TAZJAH   | 162.536 | 4.407            | RIPSAO   | 162.194 | 4.31             |
| ITOBENZ  | 162.801 | 4.114            | VICXEK   | 162.525 | 4.189            | ETUQEQ   | 162.192 | 3.966            |
| LELSOO   | 162.8   | 3.931            | XUXQEN   | 162.519 | 3.813            | EFASUA   | 162.192 | 4.131            |
| QUSVEF   | 162.178 | 3.806            | QISYAU   | 161.908 | 4.108            | IREYIO   | 161.479 | 4.055            |
| GUBQOM   | 162.177 | 4.317            | HECHAC   | 161.892 | 3.726            | KEMKIX   | 161.471 | 3.882            |
| UTIPUK   | 162.176 | 3.88             | MIMSUZ   | 161.866 | 4.362            | MOKZUJ   | 161.464 | 4.082            |
| UJULOC   | 162.173 | 4.246            | HAGQOV   | 161.862 | 4.007            | MOJKAY   | 161.464 | 3.893            |
| MATFIZ   | 162.156 | 2.678            | DAPNAL   | 161.835 | 3.977            | SAJJIZ   | 161.457 | 4.132            |
| REFLEV   | 162.147 | 4.164            | TAZJAH   | 161.828 | 4.313            | KUBTEH   | 161.453 | 4.016            |
| TEHROO   | 162.147 | 3.529            | QIRYEX   | 161.817 | 4.325            | WALBOC02 | 161.439 | 3.62             |
| DAJCIE   | 162.141 | 3.78             | LESGEY   | 161.809 | 4.033            | UWEDUW   | 161.438 | 4.379            |
| FOVGAZ   | 162.137 | 4.143            | ZUGVEC   | 161.805 | 4.335            | VICXEK   | 161.413 | 4.147            |
| TEDLUK   | 162.117 | 3.803            | GICLUB   | 161.804 | 3.998            | TERQEM   | 161.411 | 3.768            |
| QORJIQ   | 162.113 | 3.931            | XECWOT   | 161.802 | 3.846            | HAGMAG   | 161.409 | 4.156            |
| GICTAN   | 162.098 | 3.957            | CILDOR   | 161.775 | 3.346            | MAGBIH   | 161.395 | 2.958            |
| GUHHIC   | 162.091 | 3.846            | FASWED01 | 161.762 | 3.957            | NEPPAZ   | 161.394 | 3.991            |
| MUJKEI   | 162.089 | 3.887            | CILDOR01 | 161.754 | 3.35             | CEAMZN   | 161.392 | 4.254            |
| CIVQEG   | 162.082 | 3.783            | HUMYOG   | 161.708 | 4.021            | MACHIJ   | 161.391 | 3.917            |
| TEFQOK   | 162.081 | 3.542            | FEPVEE   | 161.703 | 4.205            | PIHNIE   | 161.38  | 3.693            |
| XUSGUN   | 162.073 | 4.278            | HEVSUX   | 161.7   | 3.623            | WIJDAV   | 161.375 | 3.57             |
| RUWMUT   | 162.066 | 3.546            | WEMZUJ   | 161.698 | 3.66             | JULDEZ   | 161.37  | 3.86             |
| CEYSEF   | 162.061 | 4.41             | NAKPUM   | 161.696 | 3.985            | RONZAY   | 161.369 | 3.643            |
| XAYVAX   | 162.061 | 3.93             | LAXFOJ   | 161.691 | 3.461            | QOFKIF   | 161.366 | 4.319            |
| FIQRUT   | 162.051 | 4.344            | SAQKIF   | 161.682 | 4.104            | NEYTOD   | 161.359 | 4.21             |
| AVOKOM   | 162.046 | 4.248            | GUCHAN01 | 161.662 | 4.218            | LAVWIO   | 161.353 | 4.086            |
| SUFZAX   | 162.046 | 3.219            | GUCHAN   | 161.662 | 4.218            | LIJQOM   | 161.352 | 4.279            |
| LIHYEI   | 162.043 | 2.832            | NUDNIL   | 161.659 | 3.729            | NEYTUJ   | 161.336 | 4.199            |
| HOLNUU   | 162.039 | 3.818            | TAXNOW   | 161.648 | 3.835            | MARDAN   | 161.325 | 3.824            |
| XOHNEO   | 162.036 | 3.995            | DEPYON   | 161.647 | 4.357            | WIZMAT   | 161.323 | 3.958            |
| ELAMUC   | 162.033 | 4.274            | RAQBAO   | 161.645 | 4.151            | EFASUA   | 161.312 | 4.261            |
| SIDHET   | 162.029 | 3.767            | YELFED   | 161.642 | 3.901            | ISODUP   | 161.297 | 4.271            |
| EXETIN   | 162.028 | 4.035            | FAVRUT   | 161.634 | 3.758            | MOJKAY   | 161.25  | 4.148            |
| YUBJEN   | 162.019 | 4.1              | GUZAG    | 161.623 | 3.978            | PAPFOD   | 161.245 | 4.142            |
| DAPNAL   | 162.013 | 3.823            | ESOYUG   | 161.621 | 4.174            | SUFZEB   | 161.242 | 3.583            |
| EZEJOL   | 162.012 | 4.348            | YAVMIS   | 161.602 | 3.376            | BUZTEV   | 161.242 | 3.145            |
| VIBJIA   | 162.002 | 3.895            | XUXQAJ   | 161.588 | 3.778            | RORSOI   | 161.241 | 3.802            |
| KUTRUO   | 161.988 | 3.867            | KARDEM   | 161.586 | 3.847            | JULDEZ01 | 161.23  | 3.798            |
| YIQPUK   | 161.987 | 4.333            | YEMDIG   | 161.58  | 3.04             | KOZJUH   | 161.223 | 3.808            |
| SUFZEB   | 161.978 | 3.223            | FODZAA   | 161.573 | 4.144            | PAJMUL   | 161.221 | 3.497            |
| WIBGIZ   | 161.97  | 3.544            | WAQNAH   | 161.564 | 4.285            | NEPPED   | 161.214 | 3.968            |
| HALGUZ   | 161.97  | 4.118            | QIDQON   | 161.558 | 3.283            | GUVFUY   | 161.213 | 4.339            |
| NEPPAZ   | 161.961 | 4.066            | MALFOU   | 161.548 | 3.967            | SUFZAX   | 161.202 | 3.582            |
| MIPPIM   | 161.959 | 3.711            | EQOGIB   | 161.546 | 3.91             | NEYVAR   | 161.198 | 4.241            |
| IZOWEA   | 161.954 | 3.502            | SUFZEB   | 161.536 | 4.389            | ABANAV   | 161.198 | 4.309            |
| NABKIK   | 161.949 | 4.354            | EPEHOZ   | 161.536 | 4.063            | SADFAH   | 161.195 | 3.718            |
| SESPIQ   | 161.948 | 4.322            | VEMCUM   | 161.536 | 4.121            | FOJVUX   | 161.195 | 4.39             |
| IQIXAH01 | 161.947 | 4.131            | MATNOL   | 161.528 | 4.345            | IMEFOV   | 161.193 | 4.17             |
| HAGQOV   | 161.943 | 3.863            | SUFZAX   | 161.525 | 4.392            | PEKVEI   | 161.192 | 4.385            |
| TEGRUS   | 161.937 | 3.443            | MARDAN   | 161.511 | 4.209            | VENMIL   | 161.18  | 3.698            |
| ADOMAL   | 161.93  | 4.328            | NANHAO   | 161.506 | 3.802            | CEAMZN01 | 161.18  | 4.147            |
| ZAQVEW   | 161.93  | 4.229            | LACQIS   | 161.495 | 4.316            | LUMLOW   | 161.178 | 4.011            |
| VEZYOR   | 161.912 | 3.806            | IFIZOM   | 161.488 | 4.26             | RAMLEA   | 161.175 | 4.369            |
| CUMBUI   | 161.163 | 3.507            | DUPRAI   | 160.827 | 3.45             | MOJKAY   | 160.499 | 4.078            |

| Refcodes | ∠YZnO   | d <sub>ZnO</sub> | Refcodes | ∠YZnO   | d <sub>ZnO</sub> | Refcodes | ∠YZnO   | d <sub>ZnO</sub> |
|----------|---------|------------------|----------|---------|------------------|----------|---------|------------------|
| COSBIW   | 161.159 | 4.177            | AEPYZN   | 160.819 | 4.217            | DUNXUH13 | 160.495 | 3.484            |
| LERNAZ   | 161.15  | 3.077            | GANGOS   | 160.801 | 3.955            | ECEWEP   | 160.489 | 3.916            |
| EFUJIA   | 161.147 | 4.367            | YAKYUH   | 160.787 | 4.38             | KUBTOR   | 160.479 | 4.316            |
| RAQBAO   | 161.143 | 3.868            | HOVJEK   | 160.786 | 4.169            | DEFHUT   | 160.476 | 4.316            |
| CADDEU   | 161.128 | 3.886            | BUBDIN   | 160.785 | 4.109            | RAXNAH   | 160.474 | 3.43             |
| HUVJAL   | 161.114 | 4.01             | YUZQER   | 160.767 | 4.032            | DUCLUL   | 160.471 | 3.023            |
| ESoyUG01 | 161.107 | 4.191            | IWUSID   | 160.767 | 4.379            | RUWMUT   | 160.466 | 3.622            |
| HAWFEU   | 161.094 | 3.493            | DOMLEX   | 160.758 | 4.067            | LEJQAV   | 160.455 | 4.23             |
| VISCIK   | 161.087 | 3.929            | EYERAB   | 160.757 | 3.213            | IYOBUV   | 160.449 | 4.309            |
| WETFIN   | 161.083 | 4.306            | PAJMUL   | 160.755 | 4.197            | UTEKAG   | 160.429 | 3.641            |
| LIRNIL   | 161.083 | 4.167            | BOYSEP   | 160.736 | 4.189            | ERIRAZ   | 160.427 | 3.297            |
| ZZZDVY03 | 161.08  | 4.375            | ZUFQIC   | 160.733 | 4.279            | JETXIT   | 160.426 | 3.939            |
| YUQQEI   | 161.076 | 3.871            | IWUSEZ   | 160.722 | 4.355            | EFASUA   | 160.418 | 4.016            |
| XUXQAJ   | 161.069 | 4.107            | XODFOM   | 160.72  | 4.198            | BACMOJ   | 160.411 | 4.285            |
| UKIPAH   | 161.054 | 3.892            | FAWVED   | 160.718 | 4.02             | RAMLIE   | 160.399 | 4.351            |
| CINHOW   | 161.053 | 4.385            | KAKSIC   | 160.702 | 4.331            | BEQSUP   | 160.391 | 4.219            |
| CAMPOY   | 161.051 | 3.798            | IWURIC   | 160.701 | 4.27             | IKELUG   | 160.382 | 3.567            |
| BUWCEE   | 161.05  | 3.751            | OHIMUQ   | 160.7   | 4.16             | KUBNIG   | 160.381 | 3.729            |
| XESJIO   | 161.046 | 3.633            | EPEYII   | 160.7   | 4.285            | TAYBII   | 160.343 | 4.179            |
| RUZVIR   | 161.03  | 3.356            | HEBNEJ   | 160.693 | 3.741            | IJIVAZ   | 160.339 | 4.036            |
| YOCLAD   | 161.018 | 4.27             | MARDAN   | 160.692 | 4.106            | WUBROA   | 160.327 | 3.678            |
| DASPUJ   | 161.008 | 3.926            | AHISAN   | 160.677 | 3.832            | XAXBIJ   | 160.325 | 4.194            |
| QAWLOT   | 161.007 | 4.239            | REGRIG   | 160.675 | 3.102            | VIMKOV   | 160.316 | 2.75             |
| WIWGEQ   | 160.986 | 4.331            | YOLYIK   | 160.66  | 4.057            | KARXIL   | 160.309 | 4.292            |
| NIKCAN   | 160.979 | 3.966            | QECNAR   | 160.656 | 4.403            | ESIWEK   | 160.3   | 3.487            |
| XAVKEN   | 160.978 | 3.953            | MARDAN   | 160.655 | 3.794            | SOQDAE   | 160.277 | 4.234            |
| SAJJIZ   | 160.974 | 3.864            | CAHJII   | 160.65  | 2.595            | OFUNOW   | 160.276 | 4.12             |
| XIJKAC   | 160.972 | 4.376            | VISCIK   | 160.647 | 4.21             | EVAJUI   | 160.273 | 3.856            |
| RALZUD   | 160.965 | 4.232            | OFUGAY   | 160.64  | 4.051            | ULAKIC   | 160.266 | 3.954            |
| UQEVOE   | 160.958 | 3.643            | ESADUY   | 160.636 | 3.877            | TAZJAH   | 160.251 | 4.242            |
| IGOPAW   | 160.952 | 4.191            | JIWNUB   | 160.63  | 4.281            | PAWDEA   | 160.247 | 4.206            |
| FAXCUF   | 160.946 | 3.909            | DAYPUQ   | 160.629 | 3.909            | CAVFEN   | 160.241 | 4.161            |
| MOJKAY   | 160.909 | 4.111            | EYERAB   | 160.625 | 3.936            | BEGYUJ   | 160.232 | 4.364            |
| NEYWEW   | 160.896 | 4.145            | FOSQOV   | 160.62  | 3.607            | DUNXUH12 | 160.229 | 3.479            |
| NEPLIE   | 160.892 | 3.643            | XULFEQ   | 160.616 | 3.931            | VAJXAI   | 160.227 | 4.164            |
| VARRUD   | 160.888 | 4.127            | ZETLER   | 160.615 | 3.749            | POMNAI   | 160.22  | 3.685            |
| ROBCIU   | 160.876 | 4.407            | EYAYAG   | 160.612 | 3.638            | POMNAI01 | 160.214 | 3.685            |
| DIHNEO   | 160.869 | 4.161            | MAKYUS   | 160.611 | 3.786            | ZAXKOA   | 160.201 | 3.786            |
| GIQYOY   | 160.868 | 3.744            | EFASUA   | 160.61  | 4.059            | YOYTUE   | 160.197 | 3.518            |
| WENDIE   | 160.865 | 3.96             | HUMYOG   | 160.608 | 4.3              | YEYFIT   | 160.193 | 3.862            |
| EBUBEL   | 160.863 | 4.03             | KIXLAG   | 160.608 | 3.977            | BEGYUJ01 | 160.181 | 4.368            |
| SOXTUW   | 160.854 | 4.332            | NEYVIZ   | 160.596 | 4.285            | XIZZOV   | 160.174 | 4.268            |
| WALCET   | 160.848 | 3.709            | NEYVEV   | 160.589 | 4.286            | EMATAQ   | 160.17  | 4.338            |
| ULAKIC   | 160.847 | 3.998            | YEQXEA   | 160.586 | 3.971            | YEKWOE   | 160.169 | 4.199            |
| SOQDAE   | 160.846 | 4.268            | ESoyUG   | 160.562 | 4.209            | LISZEU   | 160.168 | 3.053            |
| GUQLUA   | 160.84  | 4.231            | LAZHIG   | 160.54  | 3.773            | MATNOL   | 160.159 | 4.309            |
| IWUREY   | 160.836 | 4.231            | FAVRUT   | 160.529 | 3.783            | CUHKUN   | 160.156 | 3.047            |
| PIWNIU   | 160.829 | 3.766            | EYERAB   | 160.515 | 3.886            | DUNXUH14 | 160.143 | 3.489            |
| WUBROA   | 160.132 | 3.468            | AFUHUE   | 159.762 | 3.854            | GIMHEP   | 159.434 | 3.992            |
| XAGNEZ   | 160.123 | 3.461            | CESKUK   | 159.76  | 3.965            | MULQOA   | 159.432 | 4.326            |
| ISIWOZ   | 160.117 | 3.849            | CEQTOI   | 159.746 | 3.661            | PIJGUM   | 159.432 | 4.311            |
| UCOBOE   | 160.109 | 3.965            | MUPHOX   | 159.746 | 3.489            | NOXBK    | 159.413 | 3.971            |
| XIZZUB   | 160.083 | 4.243            | LARQAA   | 159.746 | 3.827            | TAVRAK   | 159.398 | 3.968            |
| SETVOE   | 160.082 | 4.056            | CAYGEP   | 159.744 | 4.367            | MOJKAY   | 159.393 | 4.164            |
| EFASUA   | 160.078 | 3.989            | LOSLEK   | 159.729 | 2.635            | PICBAE   | 159.386 | 4.364            |
| TEQVIW   | 160.061 | 3.959            | OKENAW   | 159.728 | 3.722            | MUZROP   | 159.344 | 3.94             |
| GUCZAG   | 160.06  | 3.91             | PEFHAN   | 159.72  | 4.096            | VUDMAK   | 159.341 | 4.283            |
| KARXOR   | 160.059 | 4.124            | QOFKIF   | 159.715 | 4.394            | ONIWEO   | 159.333 | 4.3              |
| ARAZAX   | 160.057 | 4.268            | IBESAN   | 159.707 | 3.817            | EVURUJ   | 159.327 | 4.222            |

| Refcodes | ∠YZnO   | d <sub>ZnO</sub> | Refcodes | ∠YZnO   | d <sub>ZnO</sub> | Refcodes | ∠YZnO   | d <sub>ZnO</sub> |
|----------|---------|------------------|----------|---------|------------------|----------|---------|------------------|
| HUMYOG   | 160.056 | 2.595            | WEWKAK   | 159.704 | 4.308            | VAZZII   | 159.327 | 4.083            |
| NEYWAS   | 160.055 | 4.115            | MOJKAY   | 159.692 | 3.853            | HAGHII   | 159.326 | 2.49             |
| CEQTIC   | 160.04  | 3.817            | IFIYEC   | 159.68  | 4.38             | REXLIR   | 159.325 | 4.047            |
| YUTTEN   | 160.035 | 3.924            | DUNXUH06 | 159.67  | 3.495            | TAXNOW   | 159.302 | 3.578            |
| UFUHAE   | 160.034 | 3.736            | SOGNAG   | 159.67  | 4.386            | POYNUP   | 159.29  | 4.191            |
| WAMZAN   | 160.032 | 3.408            | PUPVEC   | 159.663 | 3.793            | FIFXAU   | 159.27  | 4.29             |
| JAVCEP   | 160.016 | 3.592            | CIJXID   | 159.659 | 3.901            | VAZZII   | 159.268 | 3.805            |
| BONNOI   | 160.015 | 4.353            | VIRLAK   | 159.657 | 3.879            | POYPOL   | 159.262 | 4.096            |
| UTEKAG   | 159.973 | 3.669            | WOPNUM   | 159.637 | 4.019            | FIDFUU   | 159.245 | 4.038            |
| NEYVOF   | 159.956 | 4.284            | UVIKAO   | 159.606 | 4.162            | VEHLUQ   | 159.235 | 3.8              |
| FISCEQ   | 159.94  | 3.586            | DAPNEP   | 159.596 | 3.411            | OBORUV   | 159.22  | 3.959            |
| RUZQEI   | 159.939 | 3.914            | LIMGEV   | 159.59  | 4.237            | XABRIE   | 159.215 | 4.33             |
| SACWEB   | 159.926 | 3.061            | LIHYEI   | 159.581 | 3.896            | EFASUA   | 159.198 | 3.553            |
| TAZJAH   | 159.914 | 4.073            | PAWDAAW  | 159.576 | 4.242            | NEMTUV   | 159.197 | 3.48             |
| WUPTTEI  | 159.904 | 3.934            | LEIYAE   | 159.568 | 4.205            | VIRNUG   | 159.181 | 4.013            |
| KAHMOX   | 159.9   | 4.027            | JIWNIP   | 159.566 | 4.202            | RUWMED   | 159.171 | 3.938            |
| MARDAN   | 159.9   | 4.007            | XIQFIO   | 159.561 | 4.089            | LEZGAA   | 159.167 | 3.517            |
| WEMZUJ   | 159.894 | 4.118            | MOJKAY   | 159.539 | 3.829            | NOCTUU   | 159.165 | 4.063            |
| PAWDIE   | 159.892 | 4.295            | IROTOZ   | 159.537 | 3.866            | AQUHIG   | 159.163 | 4.03             |
| AWUCUQ   | 159.882 | 3.912            | OSOVEZ   | 159.534 | 4.219            | MEJMAT   | 159.162 | 4.246            |
| IQUDAA   | 159.882 | 4.272            | WETFOT   | 159.534 | 3.601            | UMAWOV   | 159.154 | 3.645            |
| IZAPAD   | 159.881 | 4.294            | XIRFEK   | 159.53  | 4.129            | NOXBK    | 159.15  | 3.716            |
| DEBSUZ   | 159.875 | 4.245            | VIZNUQ   | 159.528 | 4.346            | TUSGAS   | 159.137 | 4.054            |
| XUXQEN   | 159.875 | 3.507            | VIRNUG01 | 159.517 | 4.04             | DUHHAP   | 159.13  | 4.313            |
| GEVFAR   | 159.837 | 4.303            | XOQZUZ   | 159.516 | 4.159            | FOJWAE   | 159.127 | 3.864            |
| BODPOB   | 159.836 | 4.094            | PIKYOY   | 159.514 | 3.493            | VUDMUE   | 159.126 | 4.274            |
| MOMQUC   | 159.829 | 3.894            | YELFED   | 159.506 | 4.252            | RABCEE   | 159.125 | 4.244            |
| IKEMUI   | 159.821 | 4.408            | FULCOH   | 159.498 | 4.201            | QIBNOE   | 159.122 | 4.314            |
| BOFROF   | 159.814 | 4.238            | RAHGUG   | 159.496 | 4.257            | RUZVAJ   | 159.115 | 4.173            |
| IMOXEO   | 159.811 | 4.354            | MUMTOD   | 159.493 | 3.597            | EXETIN   | 159.113 | 3.729            |
| FOJZAH   | 159.804 | 4.265            | FUMGOL   | 159.486 | 4.069            | KIWZOJ   | 159.112 | 3.923            |
| PIRFOL01 | 159.798 | 3.283            | WEMWAP   | 159.482 | 4.102            | RAQVOW   | 159.106 | 4.195            |
| PIRFOL   | 159.795 | 3.284            | JIWNOV   | 159.473 | 4.203            | MARDAN   | 159.091 | 4.254            |
| JEBGED   | 159.786 | 3.445            | DUNXUH15 | 159.467 | 3.512            | MUHVIW   | 159.081 | 3.956            |
| XAVKEN   | 159.781 | 3.723            | NABMAF   | 159.465 | 4.22             | XUXQAJ   | 159.079 | 4.048            |
| AQAPUE   | 159.779 | 3.072            | MIMSUZ   | 159.465 | 4.16             | XICMUU   | 159.069 | 3.57             |
| DUNXUH21 | 159.773 | 3.528            | DUNXUH   | 159.459 | 3.497            | ZETLER   | 159.068 | 4.396            |
| DUNXUH08 | 159.763 | 3.528            | PAHTIE   | 159.452 | 4.236            | ENECIM   | 159.058 | 4.014            |
| MEMQOO   | 159.049 | 4.315            | VIVNOF   | 158.742 | 3.884            | YAYQOG   | 158.381 | 3.543            |
| LONRAK   | 159.026 | 3.892            | SIZPEY   | 158.734 | 4.044            | MOKZUJ   | 158.38  | 4.053            |
| QIBNOE01 | 159.025 | 4.312            | JULDEZ01 | 158.696 | 4.388            | QORKIR   | 158.378 | 3.575            |
| COQGAS   | 159.014 | 3.754            | XEYCEL   | 158.694 | 3.395            | PAWDOK   | 158.376 | 3.693            |
| LEHNAR   | 159.001 | 4.197            | JUGPEJ   | 158.691 | 4.269            | WIJVUJ   | 158.374 | 4.245            |
| UVUFAU   | 158.993 | 4.294            | KAYYOA   | 158.69  | 3.856            | ITAFEQ   | 158.369 | 4.359            |
| NUDNIL   | 158.992 | 4.098            | WEXFIQ   | 158.68  | 3.413            | QOMFEF   | 158.361 | 3.74             |
| UNIQEO   | 158.976 | 4.087            | JETVUC   | 158.679 | 4.127            | FOCLUH   | 158.356 | 4.223            |
| JUFFUN   | 158.968 | 4.24             | DEFGEC   | 158.677 | 4.353            | MICTAW   | 158.314 | 4.332            |
| DUDLOF   | 158.951 | 3.767            | QIRYEX   | 158.674 | 4.111            | MOJKAY   | 158.31  | 4.097            |
| EFOROI   | 158.949 | 4.08             | ASIZAG   | 158.65  | 4.139            | SIHFAT   | 158.308 | 3.841            |
| AWUCUQ   | 158.943 | 4.194            | AWEYAE   | 158.644 | 3.811            | ZIWRUP   | 158.3   | 3.787            |
| NEYVUL   | 158.939 | 4.335            | QAKKOD   | 158.638 | 3.499            | MAZLOO   | 158.284 | 4.274            |
| GEVFAR   | 158.931 | 3.279            | AJAPEH   | 158.638 | 3.192            | CAXPUM05 | 158.28  | 4.332            |
| KAKFEL   | 158.923 | 3.953            | LOQLAF   | 158.631 | 4.028            | MOJKAY   | 158.278 | 4.072            |
| JIWPAJ   | 158.918 | 4.105            | WEHJUR   | 158.631 | 4.268            | ZERVOJ   | 158.272 | 4.157            |
| MAKSUN   | 158.916 | 4.263            | NOHDOG   | 158.621 | 3.718            | IZOWAW   | 158.268 | 3.435            |
| LUMCED   | 158.909 | 4.043            | UGUKUD   | 158.62  | 3.866            | WUJRUP   | 158.264 | 4.084            |
| QUSVEF   | 158.892 | 4.052            | RUZVAJ   | 158.62  | 4.315            | YATKAG   | 158.262 | 4.071            |
| CIBKUX   | 158.892 | 3.588            | XUGDEK   | 158.614 | 3.506            | MOJKAY   | 158.253 | 4.026            |
| SEQRIS   | 158.889 | 4.407            | PEWFAZ   | 158.599 | 4.077            | PEWDUR   | 158.251 | 4.124            |

| Refcodes | ∠YZnO   | d <sub>ZnO</sub> | Refcodes | ∠YZnO   | d <sub>ZnO</sub> | Refcodes | ∠YZnO   | d <sub>ZnO</sub> |
|----------|---------|------------------|----------|---------|------------------|----------|---------|------------------|
| IZOWAW   | 158.881 | 3.523            | SUQLAU   | 158.593 | 4.014            | CAXPUM02 | 158.251 | 4.333            |
| ADIZAP   | 158.877 | 4.41             | VONCOR   | 158.589 | 4.217            | QORJIQ   | 158.24  | 4.237            |
| QIBNOE02 | 158.874 | 4.322            | ZEQLEO   | 158.573 | 4.271            | BASFEJ   | 158.237 | 3.904            |
| IWOQEQ   | 158.869 | 3.917            | FOZGIN   | 158.571 | 3.492            | LUBPEG   | 158.231 | 3.817            |
| TUFHAE   | 158.863 | 3.918            | YELFED   | 158.571 | 2.801            | XANVIR   | 158.228 | 4.056            |
| KARXIL   | 158.855 | 4.275            | PULWOJ   | 158.563 | 3.34             | IKELUG   | 158.224 | 4.095            |
| GANGIM   | 158.848 | 3.845            | TUKFIQ   | 158.554 | 3.633            | LOSCEC   | 158.218 | 4.195            |
| UJEJUO   | 158.845 | 3.949            | TEDSAX   | 158.537 | 4.084            | IJEDOR   | 158.214 | 3.473            |
| ELAMOW   | 158.841 | 4.156            | VARFAY   | 158.537 | 3.73             | LONRAK   | 158.208 | 4.139            |
| TUKDOU   | 158.841 | 3.61             | DEDVUF   | 158.536 | 4.33             | VONCOR   | 158.195 | 3.956            |
| NANVON   | 158.841 | 4.379            | DEDVUF   | 158.518 | 4.241            | FODZAA   | 158.181 | 3.971            |
| DASQAQ   | 158.834 | 3.902            | TUKDUA   | 158.509 | 3.629            | SARCIA   | 158.176 | 4.187            |
| HYZCZN   | 158.828 | 4.089            | FAKXAT   | 158.506 | 4.053            | KELTUR   | 158.173 | 4.37             |
| NAJPIX   | 158.816 | 4.093            | EQEROJ   | 158.498 | 3.748            | GIXPAG   | 158.172 | 4.334            |
| UBOYOC   | 158.811 | 4.175            | YUXWEV   | 158.492 | 4.074            | ZZZDVY02 | 158.172 | 4.366            |
| DOYBOJ   | 158.807 | 4.293            | DOSTUB   | 158.467 | 4.173            | MOJKAY   | 158.167 | 4.016            |
| KILXUC   | 158.805 | 4.13             | XULZIQ   | 158.462 | 3.653            | FIQRUT   | 158.164 | 4.009            |
| GUGYOZ   | 158.798 | 4.314            | GITWOX   | 158.456 | 4.377            | VAZZII   | 158.149 | 4.135            |
| KUZLOI   | 158.792 | 4.027            | NOJVEO   | 158.442 | 4.352            | IKASEV   | 158.148 | 3.908            |
| OFUNOW   | 158.789 | 3.928            | OWAJII   | 158.441 | 4.34             | PIBLAQ   | 158.143 | 4.246            |
| KATHUM   | 158.789 | 4.363            | UGEZIR   | 158.416 | 4.263            | GEFSOC   | 158.142 | 3.556            |
| ADUGAK   | 158.782 | 4.075            | TURHOD   | 158.415 | 3.751            | ITAFEQ01 | 158.14  | 4.393            |
| FIQDAN   | 158.775 | 3.007            | BASZUU   | 158.409 | 4.328            | REHGAN01 | 158.137 | 3.808            |
| EFASUA   | 158.773 | 3.884            | LUGREK   | 158.408 | 3.968            | SOPNOB   | 158.127 | 4.128            |
| XEMPEN   | 158.766 | 2.992            | KAMLER   | 158.405 | 4.141            | UHEZIT   | 158.126 | 3.798            |
| HAWWAE   | 158.761 | 3.834            | LUMCIH   | 158.399 | 4.051            | PIBLAQ01 | 158.123 | 4.245            |
| MAVKIG   | 158.761 | 4.366            | XOQZUZ   | 158.398 | 4.178            | DUJVUC   | 158.11  | 3.946            |
| MEJMAT   | 158.758 | 4.062            | LIRNOR   | 158.388 | 2.816            | MUMTOD   | 158.11  | 4.172            |
| JIWNOV   | 158.108 | 4.222            | MOSNEN   | 157.835 | 4.072            | RAFWUS   | 157.558 | 3.841            |
| LABQOW   | 158.108 | 4.344            | VIQZAX   | 157.835 | 4.135            | TOKZIF   | 157.554 | 3.481            |
| PUNQIZ   | 158.09  | 3.963            | EMEZOM   | 157.818 | 3.845            | DEJLEK   | 157.539 | 4.296            |
| ZNGLUD   | 158.088 | 4.401            | LIHYEI   | 157.815 | 4.046            | BOVNIK   | 157.532 | 3.871            |
| MARDAN   | 158.059 | 4.22             | YATKAG   | 157.81  | 4.26             | VIRLAK   | 157.532 | 3.484            |
| YIKTUL   | 158.058 | 4.352            | QOMFEF   | 157.808 | 3.61             | ENEYAA   | 157.511 | 3.512            |
| SUSDES   | 158.052 | 3.963            | DUWJUC   | 157.799 | 3.693            | PAGSUP   | 157.51  | 4.401            |
| IXACUF   | 158.049 | 4.089            | DINDIP   | 157.799 | 3.952            | VAQZUK   | 157.5   | 4.31             |
| BODPOB   | 158.043 | 4.203            | HUZDUD   | 157.793 | 4.262            | TIDJAR   | 157.499 | 4.343            |
| ESISIK   | 158.043 | 3.854            | QAKKUJ   | 157.774 | 3.512            | HIBMEM   | 157.474 | 4.296            |
| IFAHEC   | 158.042 | 4.227            | FISDIY   | 157.774 | 4.153            | QAVCID   | 157.465 | 3.819            |
| KINYOY   | 158.042 | 4.111            | LIJQOM   | 157.774 | 3.794            | XAVKEN   | 157.465 | 4.048            |
| JIWNIP   | 158.041 | 4.23             | AREGAF   | 157.764 | 4.171            | LUMCIH   | 157.464 | 4.131            |
| HAJLOV   | 158.028 | 4.015            | TUKFAI   | 157.761 | 3.631            | MOKZUJ   | 157.461 | 4.085            |
| REHGAN   | 158.019 | 3.812            | KARDEM   | 157.76  | 3.949            | TAZJAH   | 157.458 | 4.348            |
| RUWMED   | 158.016 | 4.357            | BIBGOJ   | 157.759 | 3.077            | IZAVEK01 | 157.451 | 4.405            |
| FUNBAU   | 158.006 | 3.963            | LAKPIY   | 157.758 | 3.797            | RUZQIM   | 157.441 | 3.753            |
| KEKHEP   | 157.998 | 4.349            | XULZIQ   | 157.749 | 3.809            | DUJWAJ   | 157.436 | 3.897            |
| YELFIH   | 157.998 | 4.378            | OFUGAY   | 157.74  | 4.013            | XEYCOW   | 157.435 | 4.246            |
| WARFAX   | 157.988 | 3.677            | RORSOI   | 157.736 | 4.052            | KAVGOH   | 157.433 | 4.186            |
| VAJLUP   | 157.987 | 3.639            | HAJBAW   | 157.734 | 3.884            | VONMIU   | 157.432 | 4.407            |
| ZNGLUD01 | 157.98  | 4.391            | ADIZAP   | 157.707 | 3.885            | RADWOI   | 157.429 | 4.221            |
| OHAHEL   | 157.979 | 4.122            | PAWDOK   | 157.707 | 3.703            | VOFNIP   | 157.425 | 3.982            |
| BODBIF   | 157.977 | 3.698            | MOSNEN   | 157.702 | 4.396            | EQERUP   | 157.416 | 3.541            |
| BOZYIA   | 157.976 | 4.387            | MAPHAO   | 157.695 | 3.865            | JUFEOE   | 157.414 | 3.986            |
| QIJZAN   | 157.97  | 4.312            | DUBMAR   | 157.691 | 3.998            | MARDAN   | 157.413 | 3.893            |
| LOZDIP   | 157.95  | 4.339            | BEMPIU   | 157.685 | 3.436            | RIZREY   | 157.41  | 4.219            |
| VAMMOM   | 157.947 | 4.353            | IQEJUK   | 157.684 | 4.127            | SUVPEH   | 157.406 | 4.048            |
| GEHYEB   | 157.945 | 3.565            | LOSLEK   | 157.683 | 3.577            | MEGNUM   | 157.405 | 4.247            |
| GOGHIT   | 157.941 | 4.173            | LECWEX   | 157.678 | 3.924            | EZEJOL   | 157.39  | 4.363            |
| RABCEE   | 157.927 | 3.762            | UKAQAB   | 157.676 | 3.702            | LABQIQ   | 157.382 | 2.82             |

| Refcodes | ∠YZnO   | d <sub>ZnO</sub> | Refcodes | ∠YZnO   | d <sub>ZnO</sub> | Refcodes | ∠YZnO   | d <sub>ZnO</sub> |
|----------|---------|------------------|----------|---------|------------------|----------|---------|------------------|
| AMERIT   | 157.926 | 4.335            | VIZPAY   | 157.67  | 4.222            | WOHQIV   | 157.378 | 4.359            |
| ODIPAU   | 157.917 | 4.286            | RAMGES   | 157.667 | 3.893            | UGEZEN   | 157.37  | 4.195            |
| RAPZAM   | 157.911 | 4.146            | LALTAV   | 157.663 | 3.317            | PUXNEB   | 157.368 | 4.353            |
| PUNQIZ   | 157.898 | 3.812            | ACORAN   | 157.662 | 4.126            | MOSKAJ   | 157.36  | 3.069            |
| ICOSIF   | 157.893 | 2.539            | COLBUB   | 157.662 | 4.163            | DAYPUQ   | 157.358 | 4.041            |
| EQEJEQ   | 157.891 | 4.38             | AJOWED   | 157.652 | 4.078            | IGOPAW   | 157.343 | 4.383            |
| IQEYOU   | 157.891 | 3.77             | ZEJYAR   | 157.647 | 4.122            | JOGBAK   | 157.342 | 4.265            |
| QANCAJ   | 157.891 | 4.163            | CIWVAG   | 157.643 | 4.392            | SEBBAF   | 157.338 | 3.868            |
| FODNAQ   | 157.87  | 3.583            | GAKTES   | 157.638 | 3.827            | PEWFED   | 157.337 | 4.214            |
| NAHGIO   | 157.865 | 3.663            | AZOHEC   | 157.619 | 3.819            | NENCOZ   | 157.33  | 4.032            |
| PUWTOQ   | 157.864 | 4.22             | ZITSAY   | 157.613 | 4.065            | XUYYAS   | 157.324 | 2.65             |
| KUBTEH   | 157.863 | 3.966            | GUBFAK   | 157.611 | 4.051            | DUWJUC   | 157.313 | 4.023            |
| XAVKEN   | 157.862 | 3.922            | SIJREJ   | 157.585 | 2.556            | MIMRAB   | 157.306 | 3.868            |
| VODMAD   | 157.857 | 4.389            | DAPNEP   | 157.574 | 3.696            | OZUNEF   | 157.302 | 2.934            |
| WANFOI   | 157.856 | 4.165            | QORFEI   | 157.573 | 3.501            | ZOGNER   | 157.301 | 3.962            |
| ZNGLUD02 | 157.855 | 4.401            | VIRLAK   | 157.566 | 3.638            | PUXNEB01 | 157.301 | 4.343            |
| RAGVIH   | 157.849 | 4.315            | CAYWIK   | 157.564 | 4.232            | GABBOD   | 157.3   | 4.266            |
| LUMCED   | 157.84  | 4.126            | PEMBOY   | 157.56  | 4.276            | RUWMED   | 157.284 | 3.575            |
| PAWCUP   | 157.263 | 3.826            | PUXNEB01 | 156.961 | 4.115            | QULHUC   | 156.701 | 4.062            |
| AWUCUQ   | 157.251 | 4.153            | NIYNUG   | 156.96  | 4.045            | LERNAZ   | 156.701 | 3.827            |
| AJOWON   | 157.24  | 4.062            | IQIXAH01 | 156.958 | 4.388            | WEWPIB   | 156.696 | 3.979            |
| AWUCUQ   | 157.24  | 4.372            | VIQMEO   | 156.955 | 3.932            | YIMXIC01 | 156.693 | 4.132            |
| KAPBEJ   | 157.236 | 4.082            | AGEXAP   | 156.951 | 4.03             | VOFNOV   | 156.673 | 3.808            |
| AWUVEV   | 157.231 | 4.125            | PUXNEB   | 156.951 | 4.127            | NAXVOB   | 156.651 | 4.128            |
| VUYBEX   | 157.218 | 4.405            | LEJQAV   | 156.945 | 4.222            | TEZKUF   | 156.648 | 4.14             |
| XIQFIO   | 157.217 | 3.975            | MARDAN   | 156.927 | 3.943            | MEPXEL   | 156.643 | 4.247            |
| UKIPAH   | 157.217 | 3.832            | CUBWIG   | 156.924 | 3.715            | BOHYED   | 156.641 | 4.084            |
| LIDWAA   | 157.213 | 4.168            | MOYNIA   | 156.92  | 4.206            | VIZPAY   | 156.63  | 4.35             |
| HIJSIG   | 157.203 | 4.127            | CUXLOZ   | 156.918 | 3.85             | DASQAQ   | 156.616 | 4.076            |
| VELROV   | 157.197 | 4.189            | PEJWUX   | 156.917 | 2.845            | RUZVIR   | 156.613 | 3.37             |
| WALBOC02 | 157.189 | 3.758            | LIHYEI   | 156.917 | 3.576            | XUSGUN   | 156.609 | 4.059            |
| JULDEZ   | 157.189 | 3.823            | IJOSEH   | 156.908 | 3.888            | SABHAF   | 156.594 | 3.807            |
| ELAMUC   | 157.188 | 4.205            | KADSEP   | 156.895 | 4.028            | LOCWAE   | 156.587 | 3.562            |
| ASUXUJ   | 157.182 | 4.291            | CANJEK   | 156.871 | 4.356            | SIJREJ   | 156.585 | 3.864            |
| TEJQOQ   | 157.174 | 3.951            | RIWWOK   | 156.866 | 3.873            | LUFVAM   | 156.57  | 4.09             |
| QIFKOJ   | 157.172 | 3.752            | BINKUI   | 156.86  | 3.936            | XEHFIC   | 156.567 | 4.04             |
| PEJWUX   | 157.16  | 3.716            | POXDIQ   | 156.859 | 4.319            | RAXNAH   | 156.566 | 3.939            |
| QUZWEO   | 157.158 | 3.917            | JULDEZ01 | 156.837 | 3.778            | MEMPAV   | 156.559 | 3.95             |
| MOJKAY   | 157.148 | 4.301            | VIRLAK   | 156.834 | 3.791            | TIRJAH   | 156.554 | 4.273            |
| PAFWEY   | 157.135 | 3.57             | RAJHIU   | 156.832 | 4.212            | FUJNEF   | 156.544 | 4.126            |
| PAFWEY10 | 157.135 | 3.57             | DAWQOK   | 156.824 | 3.813            | CEMPUJ   | 156.544 | 2.925            |
| MOMQUC   | 157.126 | 4.062            | QUDKAC   | 156.816 | 4.305            | TIRHOT   | 156.543 | 4.323            |
| RAQBAO   | 157.118 | 4.311            | CAYWEG   | 156.807 | 4.185            | IDAVIT   | 156.535 | 4.198            |
| MEPXEL   | 157.115 | 4.218            | AQOHAQ   | 156.804 | 3.876            | GUJFIB   | 156.503 | 3.921            |
| SUWBOC   | 157.113 | 3.884            | WANFUO   | 156.798 | 4.14             | EZEJOL   | 156.502 | 3.88             |
| IGUQOQ   | 157.109 | 4.214            | KAMHIS   | 156.777 | 4.29             | MUYPIH   | 156.499 | 4.19             |
| OPOBAX   | 157.109 | 3.657            | ZAFKAV   | 156.776 | 3.955            | IDAVIT   | 156.493 | 4.305            |
| VELROV   | 157.107 | 3.95             | XUSGUN01 | 156.775 | 4.284            | AFUHUE   | 156.491 | 4.08             |
| CEXTAB   | 157.105 | 4.236            | VIRLAK   | 156.775 | 3.459            | TITRIY   | 156.486 | 4.171            |
| MOJKAY   | 157.096 | 4.114            | CUWMEN   | 156.774 | 3.975            | MOJKAY   | 156.481 | 4.122            |
| NAQLAT   | 157.053 | 4.054            | AMERIT   | 156.771 | 4.152            | JITRIR   | 156.469 | 4.001            |
| RAFVED   | 157.043 | 4.173            | GOCMUI   | 156.768 | 3.671            | UDOMIK   | 156.464 | 3.742            |
| YELFIH   | 157.04  | 2.846            | HIJSOI   | 156.756 | 4.369            | LIJQOM   | 156.463 | 4.179            |
| UFANEU   | 157.033 | 4.375            | INAKOA   | 156.752 | 4.206            | XUXQEN   | 156.458 | 4.282            |
| RUZVIR   | 157.031 | 3.113            | TAZJAH   | 156.75  | 4.156            | LIYDUS   | 156.448 | 3.737            |
| KITZOD   | 157.024 | 3.715            | HUNMUA   | 156.747 | 3.394            | XARVEV   | 156.447 | 4.409            |
| YESFOS   | 157.008 | 3.878            | XECTEG   | 156.746 | 3.908            | HISWAK   | 156.445 | 3.342            |
| KILYAJ   | 157.008 | 4.149            | SOKQIU   | 156.73  | 4.36             | SUWCEU   | 156.442 | 4.225            |
| LUBPEG   | 157.005 | 3.964            | VEZYOR   | 156.727 | 3.575            | MULQOA   | 156.434 | 4.175            |

| Refcodes | ∠YZnO   | d <sub>ZnO</sub> | Refcodes | ∠YZnO   | d <sub>ZnO</sub> | Refcodes | ∠YZnO   | d <sub>ZnO</sub> |
|----------|---------|------------------|----------|---------|------------------|----------|---------|------------------|
| TEHROO   | 157.004 | 3.615            | BAZSII   | 156.725 | 2.924            | UKIMEI   | 156.431 | 4.335            |
| MIBJAK   | 156.991 | 4.026            | CABPEE   | 156.723 | 3.752            | VIQZAX   | 156.424 | 4.01             |
| TAYFIJ   | 156.984 | 4.185            | MIXLAI   | 156.721 | 4.065            | FESTOQ   | 156.419 | 3.868            |
| OFUNOW   | 156.983 | 3.942            | ROJVIW   | 156.716 | 4.299            | MIYMUC   | 156.418 | 4.176            |
| JIWNUB   | 156.981 | 4.285            | MARDAN   | 156.712 | 4.237            | CAYWIK   | 156.415 | 4.176            |
| EBALAY   | 156.975 | 3.491            | MIPYIU   | 156.706 | 4.32             | IBONOD   | 156.412 | 3.948            |
| DANNUE   | 156.972 | 3.243            | WARFAX   | 156.705 | 4.017            | UBOYOC   | 156.393 | 3.223            |
| UVIKES   | 156.965 | 4.371            | QOMFEF   | 156.701 | 3.809            | UZANUF   | 156.386 | 4.102            |
| WAJGAQ   | 156.385 | 4.389            | NAZZOG   | 156.138 | 4.01             | OVIQER   | 155.889 | 4.324            |
| MARDAN   | 156.376 | 4.2              | RETJIL   | 156.132 | 4.162            | GUBQOM   | 155.889 | 3.839            |
| ROBCEQ   | 156.375 | 4.057            | RETJIL01 | 156.132 | 4.162            | JISNEF   | 155.889 | 4.063            |
| BEMHAE   | 156.36  | 4.173            | QAYGAY   | 156.128 | 4.109            | DUJTOU   | 155.879 | 3.924            |
| WASFIF   | 156.357 | 4.337            | KILLOI   | 156.127 | 3.675            | MOJKAY   | 155.861 | 4.02             |
| NARKEA   | 156.356 | 4.383            | PAWDEA   | 156.127 | 3.864            | AZAQOJ   | 155.856 | 4.049            |
| GAVNAV   | 156.356 | 4.057            | PENPAB   | 156.122 | 3.008            | EFASUA   | 155.854 | 2.427            |
| NUKTOD   | 156.338 | 3.97             | RETDAZ   | 156.111 | 3.785            | UGEZEN   | 155.85  | 3.834            |
| MIMRAB02 | 156.323 | 3.867            | PAFWEY   | 156.111 | 4.16             | YEQSOF   | 155.842 | 4.249            |
| AJAPEH   | 156.314 | 3.26             | PAFWEY10 | 156.111 | 4.16             | PUYTAF   | 155.828 | 3.561            |
| ZEFYAM   | 156.313 | 3.81             | OTOZOO   | 156.109 | 2.957            | WARCOJ   | 155.828 | 4.074            |
| HIHBUX   | 156.313 | 4.195            | WUDMAJ   | 156.107 | 3.984            | BEMHEI   | 155.821 | 4.144            |
| IFABIA03 | 156.306 | 3.85             | NAZZOG   | 156.1   | 3.985            | MALFOU   | 155.812 | 4.357            |
| ZZZDVY04 | 156.301 | 4.325            | QIDREE   | 156.099 | 4.245            | ZZZDVY04 | 155.803 | 4.32             |
| URIRIX   | 156.294 | 4.226            | OQAJAS   | 156.096 | 3.844            | TENLUX   | 155.802 | 4.206            |
| QIBZAG   | 156.29  | 4.125            | TURHOD   | 156.093 | 4.127            | AKOFEO   | 155.801 | 3.572            |
| DUDQUR   | 156.287 | 4.395            | BEJQAJ   | 156.086 | 3.725            | EBALAY   | 155.801 | 3.616            |
| ULOWOH   | 156.287 | 4.21             | DORHID   | 156.086 | 4.306            | NOPCOK   | 155.785 | 4.076            |
| NUYPUV   | 156.283 | 4.241            | KUBTEH   | 156.082 | 3.686            | GAKTES   | 155.781 | 3.977            |
| NHBZZN10 | 156.269 | 4.189            | JAVJIA   | 156.078 | 4.266            | CUWMEN01 | 155.772 | 3.892            |
| RUHWIA   | 156.265 | 3.856            | BUNMEE   | 156.077 | 3.906            | BEQPAQ   | 155.766 | 4.338            |
| DUVHIN   | 156.264 | 4.242            | LUGTAJ   | 156.073 | 3.676            | CEAMZN01 | 155.76  | 3.612            |
| IFABIA01 | 156.263 | 3.85             | NENCOZ   | 156.066 | 3.844            | FEDYEU   | 155.755 | 4.188            |
| QARVIP   | 156.261 | 3.762            | TUKDOU   | 156.058 | 3.645            | FODXAA   | 155.743 | 3.749            |
| OYOWIL   | 156.26  | 4.003            | LOXZED   | 156.044 | 4.044            | RUVHOF   | 155.704 | 4.344            |
| VAJSUW   | 156.249 | 4.224            | RAFWUS   | 156.04  | 3.773            | HEXROV   | 155.696 | 4.32             |
| YEHYOB   | 156.247 | 3.951            | AREGAF   | 156.037 | 3.821            | JEBGED   | 155.693 | 3.951            |
| OHANIW   | 156.238 | 4.394            | DOLVOP   | 156.029 | 4.38             | REHGAN   | 155.676 | 4.28             |
| IDIFIN   | 156.233 | 4.241            | RUPSUS   | 156.025 | 2.659            | REHGAN01 | 155.668 | 4.28             |
| EPUVUH   | 156.227 | 3.951            | EQEJEQ   | 156.02  | 3.841            | WAVDAY   | 155.667 | 3.877            |
| YUXWEV   | 156.226 | 4.268            | AWEYAE   | 156.008 | 4.23             | DOYRUF02 | 155.667 | 4.076            |
| UVIKAO   | 156.226 | 3.989            | ZARYEZ   | 155.997 | 3.805            | YOQYUZ   | 155.653 | 3.901            |
| KUYGER   | 156.223 | 4.048            | IHECAB   | 155.996 | 4.174            | JEXQEJ   | 155.647 | 4.258            |
| NOPCOK   | 156.221 | 4.064            | NIDDEK   | 155.988 | 3.814            | ZETKOA   | 155.639 | 4.402            |
| ROBCEQ   | 156.218 | 4.047            | WALBOC01 | 155.984 | 3.781            | MAZLOO   | 155.63  | 4.104            |
| NAZZOG01 | 156.216 | 3.997            | MEJYIN   | 155.943 | 3.872            | CAFHUP   | 155.627 | 4.054            |
| KIBZAX   | 156.21  | 4.284            | QUFFED   | 155.939 | 3.045            | EQOVEL   | 155.614 | 3.75             |
| GANVAV   | 156.204 | 4.057            | KUBNAX   | 155.939 | 3.721            | BECKEC   | 155.613 | 3.983            |
| HIQREF   | 156.201 | 4.104            | ODUKEH   | 155.932 | 4.106            | KEGKEN   | 155.606 | 4.348            |
| JANLUF   | 156.194 | 4.107            | TURHOD   | 155.931 | 4.086            | LARQAA   | 155.606 | 3.993            |
| OXPAZN   | 156.191 | 3.928            | YAKPAD01 | 155.931 | 4.361            | CUMBUI   | 155.589 | 4.251            |
| MITFEB   | 156.186 | 4.258            | QOMFEF   | 155.928 | 3.838            | TALZEM   | 155.585 | 3.886            |
| QIDRII   | 156.181 | 4.239            | GASREA   | 155.927 | 4.189            | AYOCUN   | 155.57  | 4.061            |
| NAZZOG01 | 156.17  | 4.03             | GANVID   | 155.927 | 4.049            | XUXPAI   | 155.564 | 4.013            |
| HORCID   | 156.163 | 4.036            | WIJDAV   | 155.923 | 4.235            | DEPYON   | 155.561 | 4.203            |
| YOYTUE   | 156.163 | 3.803            | BUNLUT   | 155.915 | 4.358            | KUBTOR   | 155.558 | 3.785            |
| LOVSAS   | 156.154 | 3.725            | AZOHII   | 155.899 | 4.024            | RAMGES   | 155.555 | 4.025            |
| CEYSEF   | 156.145 | 4.308            | BUBSOJ   | 155.898 | 4.056            | NOPCOK   | 155.554 | 4.063            |
| FUPQOW   | 156.144 | 4.261            | LEQWIP   | 155.893 | 3.84             | MUIKEI   | 155.551 | 3.628            |
| NETYUI   | 155.541 | 4.096            | TIKXET   | 155.245 | 3.818            | LOGZAK   | 155.008 | 3.957            |
| PIDMEV   | 155.539 | 3.812            | OYOWIL   | 155.244 | 4.195            | HEQQUR   | 155.004 | 3.996            |

| Refcodes | ∠YZnO   | d <sub>zno</sub> | Refcodes | ∠YZnO   | d <sub>zno</sub> | Refcodes | ∠YZnO   | d <sub>zno</sub> |
|----------|---------|------------------|----------|---------|------------------|----------|---------|------------------|
| BAXWUW   | 155.539 | 3.695            | XUXPAI   | 155.243 | 3.857            | DAGYAM   | 155     | 3.795            |
| XUNWIM   | 155.534 | 4.281            | ASUXOD   | 155.232 | 3.946            | VIRLAK   | 154.984 | 3.865            |
| IPAPEU   | 155.533 | 3.866            | UJAPOL   | 155.226 | 3.975            | MATNOL   | 154.984 | 4.287            |
| YAXNIX   | 155.53  | 4.01             | DUVHEJ   | 155.224 | 4.333            | WALBOC   | 154.981 | 3.8              |
| ZARYEZ   | 155.527 | 4.381            | HEMWOO   | 155.218 | 3.904            | WENTAN   | 154.974 | 3.828            |
| DOHBEI   | 155.527 | 4.191            | JEYVAO   | 155.203 | 4.088            | ROWBAI   | 154.974 | 3.864            |
| DAWQIE   | 155.523 | 4.351            | CEQJER   | 155.186 | 3.897            | RUZVAJ   | 154.965 | 4.289            |
| ENEYAA   | 155.521 | 3.99             | KASVAC   | 155.182 | 3.926            | YUZQER   | 154.953 | 3.837            |
| SABGEI   | 155.517 | 4.377            | LAVWIO   | 155.177 | 4.074            | KIGBIL   | 154.933 | 4.18             |
| YAKPAD   | 155.511 | 4.349            | DUHHIZ   | 155.168 | 2.758            | AZIXUD   | 154.907 | 4.038            |
| JAZKII   | 155.502 | 2.867            | ADIZAP   | 155.167 | 4.33             | SEWVEZ   | 154.899 | 2.903            |
| QOFKIF   | 155.502 | 4.115            | DUVPER   | 155.159 | 3.015            | VIQMEO   | 154.892 | 3.914            |
| QEHVUW   | 155.496 | 4.35             | VIBJEW   | 155.15  | 3.846            | FAKHOQ   | 154.892 | 3.957            |
| OKIJAW   | 155.495 | 3.841            | CATVUS01 | 155.131 | 4.355            | LUKRIT01 | 154.889 | 3.955            |
| XUGDEK   | 155.485 | 4.258            | AVIMOI   | 155.13  | 4.081            | OXUZAK   | 154.887 | 3.761            |
| UZAFOR   | 155.481 | 4.267            | MIHNOH   | 155.122 | 3.879            | LUKRIT   | 154.885 | 3.966            |
| EYODAZ   | 155.479 | 4.196            | TAZJAH   | 155.112 | 4.235            | WENTUE   | 154.884 | 4.052            |
| FIDFUU   | 155.474 | 4.149            | XUCFUX   | 155.108 | 4.372            | QIPLAE   | 154.883 | 4.055            |
| WEYCEK   | 155.473 | 4.256            | TAZJAH   | 155.104 | 4.328            | FODZAA   | 154.877 | 4.378            |
| JETGAU   | 155.469 | 3.827            | CATVUS03 | 155.103 | 4.345            | GAWTEF   | 154.869 | 3.988            |
| SABGIM   | 155.447 | 4.025            | LOSCEC   | 155.102 | 4.314            | GICMAI   | 154.863 | 3.44             |
| MOJKAY   | 155.441 | 4.141            | DAPNAL   | 155.094 | 3.776            | EHEWIY   | 154.844 | 4.072            |
| XUXPAI   | 155.436 | 4.37             | AZOHIJ   | 155.084 | 3.755            | XAMNIJ   | 154.84  | 4.042            |
| XIXPIE   | 155.428 | 4.222            | CATVUS05 | 155.082 | 4.353            | OMUVUO   | 154.835 | 4.017            |
| MOJKAY   | 155.413 | 4.16             | QORJIQ   | 155.08  | 3.983            | TECGUF   | 154.834 | 3.643            |
| GITWOX   | 155.381 | 4.206            | AVIMOI   | 155.079 | 4.268            | IGAVAN   | 154.825 | 4.119            |
| UKIPAH   | 155.374 | 4.228            | SENJEB   | 155.079 | 4.242            | COSBIW   | 154.819 | 4.256            |
| NAHHUB   | 155.365 | 3.972            | IQIBAN   | 155.075 | 4.122            | NONNEM   | 154.816 | 3.984            |
| XANVIR   | 155.36  | 4.002            | QUFGII   | 155.074 | 4.085            | HEMWOO   | 154.814 | 2.962            |
| HECHAC   | 155.354 | 4.152            | CATVUS02 | 155.061 | 4.351            | BEWBAI   | 154.812 | 3.874            |
| DAPPAM   | 155.342 | 3.427            | EQOGIB   | 155.055 | 4.309            | VIXVIJ   | 154.804 | 3.957            |
| NOHDOG   | 155.338 | 4.404            | CITTUW   | 155.054 | 3.871            | IGAVAN01 | 154.787 | 4.136            |
| MARDAN   | 155.338 | 4.365            | CATVUS04 | 155.046 | 4.35             | RUZVIR   | 154.782 | 3.467            |
| IROTOZ   | 155.326 | 4.055            | FEBYIW   | 155.044 | 4.195            | WIPSUJ   | 154.777 | 3.755            |
| FEDYAQ   | 155.322 | 4.404            | MIMZEP   | 155.043 | 4.044            | CAYWEG   | 154.769 | 4.172            |
| DAMSUH   | 155.308 | 4.161            | LIRNOR   | 155.042 | 4.146            | DOQTIP   | 154.766 | 4.086            |
| GIQNUT   | 155.302 | 4.326            | FEBYIW   | 155.037 | 4.005            | DADXUD   | 154.765 | 4.358            |
| VOCNAE   | 155.3   | 3.929            | AXOTEP   | 155.035 | 3.888            | IJUZAQ   | 154.754 | 4.332            |
| YUBZAX   | 155.29  | 4.174            | WIJDAV   | 155.027 | 4.273            | CAYWIK   | 154.751 | 3.991            |
| MARDAN   | 155.283 | 4.042            | FOSQOV   | 155.024 | 3.913            | ZIZMEC   | 154.75  | 3.8              |
| LOHRAE   | 155.279 | 4.15             | YUQQEI   | 155.023 | 4.382            | DEHFUR01 | 154.749 | 4.211            |
| MCYSZN   | 155.274 | 4.145            | WUFBUV   | 155.021 | 3.676            | QIFKUP   | 154.737 | 3.993            |
| HOXMIQ   | 155.268 | 4.308            | CERGAI   | 155.015 | 4.128            | XEYBEL   | 154.726 | 4.046            |
| XIMWAS   | 155.268 | 3.65             | MATVAG   | 155.013 | 4.038            | IGAVAN01 | 154.721 | 4.123            |
| JEXQEJ   | 155.256 | 3.996            | CAWLIY   | 155.013 | 4.188            | FAHJEF   | 154.716 | 4.207            |
| ROBCIU   | 155.256 | 4.265            | EDOVUQ   | 155.012 | 4.268            | GABYEO   | 154.689 | 4.003            |
| NECZUR   | 155.251 | 4.249            | CUBFAH   | 155.01  | 2.712            | NINSOW   | 154.689 | 4.241            |
| YUTTEN   | 154.683 | 3.713            | MIVDIF   | 154.456 | 4.043            | PAWDAW   | 154.166 | 3.835            |
| MARDAN   | 154.68  | 4.275            | UVUFAU   | 154.449 | 3.598            | OYEXOI   | 154.165 | 4.009            |
| ASUXOD   | 154.674 | 3.919            | OYOWEH   | 154.434 | 4.215            | EHOPAV   | 154.16  | 4.33             |
| ZERVOJ   | 154.672 | 3.661            | ATAHAE   | 154.433 | 3.839            | MIKCEP   | 154.156 | 3.432            |
| XUXPAI   | 154.672 | 3.688            | MAJDUY   | 154.428 | 4.398            | UGEZOX   | 154.148 | 3.853            |
| POLDOL   | 154.667 | 4.191            | KUBNAX   | 154.426 | 3.725            | ISODOJ   | 154.136 | 3.633            |
| GAHXEU   | 154.656 | 4.065            | CIMDAF   | 154.422 | 3.791            | ZURXUF   | 154.131 | 4.273            |
| HORCID   | 154.656 | 4.066            | LERVOV   | 154.418 | 4.189            | WUPTAE   | 154.131 | 3.999            |
| POSBEG   | 154.655 | 3.914            | VOCNAE   | 154.418 | 4.002            | NEPMIF   | 154.128 | 3.91             |
| DAYPOK   | 154.654 | 4.342            | NADCUS   | 154.417 | 4.232            | MOJKAY   | 154.124 | 4.07             |
| KOMRAH   | 154.649 | 4.314            | DOYRUF01 | 154.416 | 4.05             | VIBJEW   | 154.119 | 3.911            |
| CATVUS   | 154.648 | 4.354            | WEYFIR   | 154.412 | 3.984            | MUVVUW   | 154.117 | 3.668            |



| Refcodes | ∠YZnO   | d <sub>ZnO</sub> | Refcodes | ∠YZnO   | d <sub>ZnO</sub> | Refcodes | ∠YZnO   | d <sub>ZnO</sub> |
|----------|---------|------------------|----------|---------|------------------|----------|---------|------------------|
| IWEMUT   | 154.647 | 4.018            | AJOWON   | 154.411 | 4.034            | MAKCEI   | 154.108 | 4.285            |
| HECHAC   | 154.643 | 4.163            | LAXSAH   | 154.402 | 3.952            | WERJOT   | 154.107 | 4.015            |
| EKOZUB   | 154.639 | 4.252            | AMIMIU   | 154.402 | 4.192            | OYEXIC   | 154.104 | 4.028            |
| LIGVAY   | 154.639 | 4.254            | BOCRIX   | 154.395 | 3.952            | XULZIQ   | 154.097 | 3.499            |
| ZUFQEY   | 154.637 | 4.183            | SOBNIJ   | 154.395 | 4.024            | YOHZOL   | 154.095 | 3.06             |
| MOJKAY   | 154.628 | 3.824            | WIJDAV   | 154.393 | 3.818            | BATXIG   | 154.094 | 4.235            |
| IJURAI   | 154.611 | 3.772            | WENTAN01 | 154.388 | 3.835            | RUZTOV   | 154.079 | 3.68             |
| BOPHAR   | 154.604 | 3.059            | QUSVEF   | 154.383 | 4.271            | MOJKAY   | 154.072 | 3.974            |
| FIZWAO   | 154.603 | 3.808            | QOMFEF   | 154.377 | 3.763            | DEBSUZ   | 154.072 | 3.849            |
| DAJLEI   | 154.602 | 4.129            | FAVRAX   | 154.377 | 4.228            | SOPWIF   | 154.071 | 3.671            |
| FAXCUF   | 154.599 | 4.076            | RAMROP   | 154.37  | 3.962            | RINSIT   | 154.066 | 4.276            |
| XUCVOG   | 154.587 | 4.172            | IDIFIN   | 154.368 | 4.063            | GOBJAK   | 154.056 | 3.831            |
| UIRUB    | 154.583 | 4.344            | JIXLUY   | 154.367 | 3.54             | CEPJUE   | 154.048 | 3.769            |
| CEAMZN   | 154.58  | 3.634            | UNAGUN   | 154.362 | 3.844            | CESKUK   | 154.046 | 3.774            |
| MUMTOD   | 154.578 | 4.093            | GUCHAN   | 154.357 | 3.947            | VIXVOP01 | 154.046 | 4.375            |
| QAYLEK   | 154.573 | 4.184            | GUCHAN01 | 154.357 | 3.947            | SARXAO   | 154.044 | 4.285            |
| PUPMOD   | 154.566 | 4.178            | YIJDAY   | 154.356 | 4.182            | VELQUC   | 154.043 | 4.323            |
| LAGVEX   | 154.559 | 4.117            | OCADAY   | 154.342 | 3.801            | CIJXID   | 154.041 | 4.147            |
| DASPUJ   | 154.557 | 4.127            | COWCAU   | 154.341 | 4.068            | MEJYIN   | 154.028 | 3.764            |
| SERIZN10 | 154.556 | 4.23             | REFDEN   | 154.334 | 4.143            | MUMTOD   | 154.012 | 3.195            |
| ZINLUG   | 154.556 | 3.863            | IGAVAN   | 154.334 | 4.155            | SOXQEE   | 154.011 | 4.077            |
| EWOJAC   | 154.552 | 4.156            | EBUBEL01 | 154.329 | 4.251            | SOKZOJ   | 154.011 | 3.911            |
| CIHWEX   | 154.548 | 3.653            | QIQDOL   | 154.324 | 3.781            | IDEFII   | 154.009 | 4.266            |
| TIRHUZ   | 154.541 | 4.313            | LASMEZ   | 154.296 | 4.114            | IGOPAW   | 154.009 | 4.036            |
| MUJKEI   | 154.536 | 3.967            | UNAGOH   | 154.287 | 3.836            | VIXVOP02 | 154.009 | 4.378            |
| FONNUR   | 154.531 | 3.689            | KIJNUP   | 154.286 | 4.244            | ISOKOQ   | 153.979 | 3.446            |
| FEDYEY   | 154.518 | 4.226            | JOYZEE   | 154.285 | 3.644            | QAKMAQ   | 153.979 | 3.634            |
| CORLOM   | 154.514 | 3.866            | IXOFUY   | 154.275 | 4.028            | XASCUQ   | 153.979 | 3.85             |
| LUFXUI   | 154.51  | 3.883            | BAVVUS   | 154.272 | 3.751            | YOLYIK   | 153.978 | 4.36             |
| LICHOU   | 154.506 | 4.237            | TENLUX   | 154.268 | 3.818            | MIKBOY   | 153.976 | 3.912            |
| XAGNEZ   | 154.506 | 3.737            | DEFHUT   | 154.229 | 4.159            | ZETLAN   | 153.975 | 4.314            |
| KUBTEH   | 154.5   | 3.661            | ETUXAT   | 154.215 | 4.402            | UJEYIT   | 153.969 | 3.456            |
| XUXQEN   | 154.487 | 4.002            | MUYCOB   | 154.213 | 3.845            | MARDAN   | 153.968 | 4.357            |
| EMEZOM   | 154.482 | 3.769            | MOJKAY   | 154.193 | 4.123            | AFIQUB   | 153.966 | 4.35             |
| FUJBIX   | 154.474 | 4.328            | GASRIE   | 154.186 | 4.195            | YIMQES   | 153.963 | 3.7              |
| VIXVIJ   | 154.473 | 3.951            | LUVBAH   | 154.173 | 4.238            | AFUJAM   | 153.962 | 3.77             |
| TUKFAI   | 154.471 | 4.243            | ETUXAT   | 154.169 | 4.386            | SOQDAE   | 153.958 | 4.202            |
| UTIPUK01 | 153.946 | 2.717            | KUBTIL   | 153.704 | 4.069            | YUBBAY   | 153.431 | 4.178            |
| CUHKUN   | 153.943 | 4.367            | DUBMEV   | 153.688 | 4.004            | RERKUW   | 153.418 | 3.79             |
| DEHFUR   | 153.942 | 4.243            | LAVWIO   | 153.661 | 4.089            | MUDKOM   | 153.409 | 4.387            |
| OHUQAJ   | 153.939 | 4.299            | ADIZAP   | 153.661 | 4.108            | WOLKUF   | 153.395 | 4.195            |
| VIXVOP03 | 153.932 | 4.389            | WARCOJ   | 153.66  | 4.099            | HAWFEU   | 153.392 | 3.283            |
| HOXMIQ   | 153.931 | 3.758            | KUBVOU   | 153.654 | 4.212            | CUWMEN01 | 153.39  | 4.093            |
| JENWIL   | 153.926 | 3.874            | YUPGUN   | 153.654 | 4.189            | HAGQOV   | 153.385 | 4.159            |
| VUDWUP   | 153.922 | 2.986            | VIXTOM   | 153.649 | 4.117            | NIQLAC   | 153.385 | 4.374            |
| VIXTOM   | 153.915 | 4.032            | AQIFOW   | 153.648 | 4.403            | CEAMZN   | 153.38  | 4.116            |
| OZUNEF   | 153.901 | 4.222            | VAJSUW   | 153.643 | 4.237            | ISODUP   | 153.371 | 3.668            |
| ZIJJEK   | 153.899 | 3.885            | XUXQEN   | 153.642 | 3.891            | VIVNOF   | 153.364 | 4.116            |
| TUKFIQ   | 153.878 | 4.268            | YEFVAI   | 153.641 | 3.467            | UVIKES   | 153.353 | 3.83             |
| KOMRAH   | 153.873 | 4.298            | YUXRAM   | 153.636 | 3.954            | TUKDOU   | 153.341 | 4.274            |
| VABQIC   | 153.868 | 4.39             | YUZQIV   | 153.635 | 4.248            | RUZQAE   | 153.327 | 4.377            |
| VIXVOP04 | 153.863 | 4.401            | YEFVAI   | 153.628 | 4.223            | WEYMOE   | 153.323 | 3.688            |
| BUJBUG   | 153.858 | 3.936            | XALXOX   | 153.616 | 3.358            | KEBGIK   | 153.321 | 3.9              |
| LELDEM   | 153.856 | 3.934            | MOJKAY   | 153.615 | 4.345            | REHGAN   | 153.317 | 4.076            |
| GIZFUT   | 153.856 | 3.227            | XOHNEO   | 153.603 | 3.611            | SOQDAE   | 153.315 | 3.908            |
| QARSIL01 | 153.855 | 4.377            | YIMKEM   | 153.598 | 4.36             | HAGQUB   | 153.312 | 3.853            |
| NIQREK   | 153.84  | 4.322            | KEKXAB   | 153.598 | 4.282            | LUPPEU   | 153.31  | 4.39             |
| TUDSET   | 153.839 | 3.702            | EZEJOL   | 153.597 | 4.391            | KILLOI   | 153.3   | 3.686            |
| GUQLUA   | 153.833 | 3.617            | JENWIL   | 153.596 | 3.949            | ULEPOS   | 153.3   | 3.924            |

| Refcodes | ∠YZnO   | d <sub>ZnO</sub> | Refcodes | ∠YZnO   | d <sub>ZnO</sub> | Refcodes | ∠YZnO   | d <sub>ZnO</sub> |
|----------|---------|------------------|----------|---------|------------------|----------|---------|------------------|
| GIXDOH   | 153.832 | 4.187            | CUJFOF   | 153.587 | 3.771            | FOWQEQ   | 153.292 | 4.326            |
| NETYUI   | 153.826 | 4.199            | GIZTEQ   | 153.558 | 3.871            | DEKGAD   | 153.285 | 4.316            |
| GASSAX   | 153.822 | 4.214            | NOBHIX   | 153.554 | 3.953            | LISXEU   | 153.281 | 4.281            |
| IFAHEC   | 153.817 | 4.357            | TUFHAE   | 153.546 | 4.018            | QEKNAZ   | 153.281 | 4.051            |
| BOCRIX   | 153.814 | 4.02             | EMOQIH   | 153.545 | 4.049            | UHOQEN   | 153.274 | 3.628            |
| SEZMIW   | 153.814 | 3.811            | MOBFOB   | 153.537 | 4.238            | REHGAN   | 153.274 | 4.042            |
| TUJWIH   | 153.802 | 3.446            | VIXVOP10 | 153.532 | 4.376            | FAKJIM   | 153.271 | 3.879            |
| QANTIJ   | 153.799 | 4.175            | VIMNAJ   | 153.526 | 3.848            | VOFNIP   | 153.271 | 4.325            |
| DEHFIH   | 153.789 | 4.03             | LETRIP   | 153.52  | 4.043            | EBUBOV01 | 153.27  | 3.283            |
| IZIPAI   | 153.779 | 4.204            | PIDMEV01 | 153.514 | 3.041            | CUWMEN   | 153.267 | 4.197            |
| AHOFUZ   | 153.771 | 4.266            | DUQZOH   | 153.51  | 3.787            | QUTHOE   | 153.265 | 4.134            |
| TUKDUA   | 153.77  | 4.252            | DAYZEK   | 153.507 | 3.906            | PIDTOO   | 153.262 | 4.181            |
| DEHFUR01 | 153.769 | 3.871            | FASQUN   | 153.5   | 3.925            | VUWCIA   | 153.262 | 4.148            |
| KITZOD   | 153.763 | 4.39             | ACORAN   | 153.499 | 4.374            | UWIQEX   | 153.26  | 4.215            |
| TIQBEB   | 153.757 | 3.939            | SIPJIL   | 153.493 | 4.062            | DOMHOD   | 153.253 | 3.834            |
| EBUBEL01 | 153.75  | 3.992            | CAYWIK   | 153.479 | 3.919            | KIWZOJ   | 153.248 | 3.902            |
| ZAWHIQ   | 153.747 | 4.169            | SUWCEU   | 153.472 | 4.354            | YISPAV   | 153.247 | 4.015            |
| MUPHOX   | 153.745 | 4.069            | LUMLUC   | 153.472 | 4.139            | HUQWOG   | 153.246 | 3.82             |
| SITVUN   | 153.743 | 3.775            | UXAMEN02 | 153.469 | 4.122            | SEKNAA   | 153.234 | 3.859            |
| SEHFOC   | 153.739 | 4.076            | OYAPUB   | 153.468 | 3.958            | DEHFUR   | 153.231 | 4.108            |
| ASIYUZ   | 153.734 | 3.988            | EFOXEF   | 153.467 | 3.762            | DAWQOK   | 153.23  | 4.304            |
| DOYRUF   | 153.728 | 4.016            | GOBJAK   | 153.461 | 3.848            | ASUXOD   | 153.224 | 4.164            |
| KOHBEP   | 153.72  | 4.126            | BOCRIX   | 153.459 | 4.014            | ADIZAP   | 153.208 | 4.386            |
| GEYRIO   | 153.718 | 4.165            | BEMHAG   | 153.45  | 3.74             | NOZLIX   | 153.207 | 3.669            |
| FUPQOW   | 153.716 | 4.301            | ZAWTOI   | 153.445 | 3.461            | WIRHUD   | 153.201 | 4.381            |
| LADTAO   | 153.714 | 3.632            | NOPCOK   | 153.44  | 3.998            | UQEDIE   | 153.192 | 3.81             |
| REGREE   | 153.711 | 4.298            | ZARYEZ   | 153.432 | 4.152            | WARCAV   | 153.191 | 4.248            |
| REHGAN01 | 153.178 | 4.04             | WIJDAV   | 152.922 | 4.122            | VUDPUI   | 152.661 | 2.947            |
| LENSON   | 153.172 | 4.125            | MAZLOO   | 152.921 | 3.929            | ZZZDVY02 | 152.653 | 3.846            |
| WOHQIV   | 153.166 | 4.37             | TILSUG   | 152.921 | 4.219            | QUBLAB   | 152.648 | 3.915            |
| RESSUH   | 153.156 | 4.205            | IJUXUG   | 152.9   | 4.277            | QANZEL   | 152.644 | 4.328            |
| XIJKAC   | 153.143 | 4.356            | LECTUK   | 152.882 | 3.836            | VUDPIW   | 152.64  | 2.969            |
| NUMJUD   | 153.136 | 4.185            | WUDMAJ   | 152.881 | 4.311            | BAMZAR   | 152.638 | 4.329            |
| FORWOA   | 153.13  | 3.72             | HUZDUD   | 152.879 | 4.357            | DATVUQ   | 152.635 | 3.984            |
| YEYVEH   | 153.125 | 4.045            | ETUCOM   | 152.845 | 4.047            | VUDQET   | 152.63  | 2.961            |
| RAJSAA   | 153.125 | 4.255            | VAJHIA   | 152.837 | 4.061            | LAYTAJ   | 152.625 | 3.015            |
| ZOGNER   | 153.123 | 4.037            | EMOQIH   | 152.83  | 3.811            | VUDPOC   | 152.623 | 2.96             |
| EBUBOV   | 153.116 | 3.284            | SUWZOC   | 152.823 | 4.375            | VUDPUI01 | 152.621 | 2.952            |
| PIDMEV   | 153.113 | 3.049            | LAWHAV   | 152.819 | 3.036            | SIKBEV   | 152.62  | 4.406            |
| GUQLUA   | 153.107 | 4.059            | RUGYIE   | 152.813 | 3.893            | DEDYES   | 152.616 | 4.358            |
| IJEXOL   | 153.107 | 4.293            | NEKPOK   | 152.81  | 4.344            | XAGQAZ   | 152.609 | 4.226            |
| WARCOJ   | 153.106 | 3.776            | GURLUB   | 152.801 | 4.243            | EDONOE   | 152.603 | 3.975            |
| REHGAN01 | 153.103 | 4.072            | XUXQEN   | 152.799 | 3.98             | ULEXER   | 152.599 | 4.362            |
| YUZQER   | 153.103 | 4.065            | TIRHEJ   | 152.793 | 4.213            | FEXBOD   | 152.596 | 4.375            |
| WUCFEI   | 153.1   | 3.95             | XAXZIG   | 152.775 | 4.182            | GAPDAE   | 152.593 | 3.619            |
| IXOFUY   | 153.089 | 3.717            | ICUFOC   | 152.771 | 3.818            | BAVVUS   | 152.588 | 3.712            |
| MARDAN   | 153.087 | 4.041            | WAJGAQ   | 152.76  | 4.264            | VUDQOD   | 152.587 | 2.947            |
| DUCJOB01 | 153.086 | 4.057            | SASGEY   | 152.756 | 4.117            | WALCET   | 152.58  | 4.141            |
| XEYSOM   | 153.077 | 4.28             | EFOXAB   | 152.751 | 3.795            | JIQPAA   | 152.574 | 3.95             |
| ASUXOD   | 153.077 | 4.145            | ZIJJEK   | 152.748 | 3.824            | VUDXAW   | 152.572 | 2.936            |
| NUWRON   | 153.076 | 4.016            | FODNAQ   | 152.748 | 4.406            | DUBMOF   | 152.559 | 4.002            |
| NEPPAZ   | 153.069 | 4.384            | VUDQET01 | 152.746 | 2.939            | LUBPEG   | 152.549 | 4.267            |
| NOLYIW   | 153.068 | 4.374            | CEAMZN01 | 152.745 | 3.72             | MAZLOO   | 152.538 | 3.949            |
| JISNEF   | 153.061 | 3.117            | VIZSEE   | 152.742 | 4.326            | UDACEH   | 152.537 | 4.141            |
| KEHLAO   | 153.059 | 3.918            | PETFON   | 152.74  | 4.409            | QOFKIF   | 152.525 | 4.244            |
| EYACUC   | 153.054 | 4.119            | FUJBOD   | 152.739 | 4.339            | LUZZEM   | 152.525 | 3.931            |
| ICUGIX   | 153.043 | 4.311            | NOHFAU   | 152.727 | 4.059            | AJOWED   | 152.518 | 4.076            |
| FAKTIY   | 153.043 | 4.04             | HOTNIQ   | 152.726 | 3.777            | XAGQAZ01 | 152.51  | 4.25             |
| WALCIX   | 153.034 | 4.09             | TOHYUM01 | 152.721 | 3.743            | ROLNEM   | 152.499 | 3.773            |

| Refcodes | ∠YZnO   | d <sub>ZnO</sub> | Refcodes | ∠YZnO   | d <sub>ZnO</sub> | Refcodes | ∠YZnO   | d <sub>ZnO</sub> |
|----------|---------|------------------|----------|---------|------------------|----------|---------|------------------|
| USITUM   | 153.033 | 4.003            | DAYPUQ   | 152.718 | 3.932            | BETTEC   | 152.492 | 4.209            |
| TUXMIL   | 153.027 | 3.385            | OHUQAJ   | 152.715 | 4.298            | FUPQOW   | 152.484 | 4.276            |
| UMAMED   | 153.011 | 4.126            | OJUHUV   | 152.714 | 4.119            | KAMTID   | 152.481 | 4.401            |
| NIDMOD   | 153.008 | 3.62             | FAZCUH   | 152.713 | 3.881            | IHITUR   | 152.476 | 4.067            |
| LILVAD   | 153.005 | 4.348            | DUBMIZ   | 152.708 | 3.984            | LIDWAA   | 152.475 | 4.092            |
| CEAMZN01 | 152.997 | 4.064            | DORFUN   | 152.704 | 4.297            | ZAQVOG   | 152.474 | 3.856            |
| VAJHIA   | 152.992 | 4.173            | ZOGNER   | 152.703 | 3.828            | UQEDIE   | 152.469 | 3.434            |
| GUWXIG   | 152.99  | 4.399            | NOPCOK   | 152.694 | 3.953            | YEFQOR   | 152.464 | 4.382            |
| TAYBII   | 152.981 | 4.229            | XULZIQ   | 152.688 | 3.802            | XANVIR   | 152.454 | 3.836            |
| KOKBAO   | 152.967 | 4.163            | OQOFUW   | 152.686 | 3.866            | RETDZ    | 152.451 | 4.347            |
| XUQZAK   | 152.966 | 4.128            | HEXGUO   | 152.684 | 4.064            | ATULIM   | 152.448 | 4.358            |
| GICLUB   | 152.953 | 3.625            | HAGQUB   | 152.679 | 3.824            | VONCOR   | 152.448 | 4.286            |
| IJUXUG01 | 152.94  | 4.27             | COVQIQ   | 152.675 | 4.083            | EMATAQ   | 152.429 | 3.97             |
| KEHNIW   | 152.939 | 4.214            | CEAMZN   | 152.671 | 3.723            | WAQFIG   | 152.426 | 3.997            |
| QENFAR   | 152.936 | 4.357            | UGEZIR   | 152.669 | 3.83             | VEKWUE   | 152.42  | 4.35             |
| YEHYOB   | 152.924 | 4.161            | BIZFUL   | 152.667 | 4.275            | CEBCUJ   | 152.42  | 4.309            |
| BOVNIK   | 152.922 | 3.829            | XEBSIG   | 152.661 | 4.146            | VEGLOK   | 152.413 | 4.14             |
| MOJKAY   | 152.4   | 3.853            | RUTWUZ   | 152.185 | 4.159            | QUSVIJ   | 151.987 | 4.185            |
| AQEYOK   | 152.393 | 4.115            | UXUTAK   | 152.174 | 3.898            | CEVYIM01 | 151.98  | 4.202            |
| NUHHIK   | 152.387 | 4.3              | AHOMUH   | 152.172 | 3.801            | LUNBIF   | 151.979 | 4.278            |
| ELAMUC   | 152.386 | 4.14             | ACACZM01 | 152.171 | 4.047            | QORFAE   | 151.977 | 4.362            |
| MATVAG   | 152.385 | 4.02             | RUZTEL   | 152.167 | 3.699            | PAHPIB   | 151.971 | 4.344            |
| DADXOX   | 152.378 | 4.331            | BOTPOQ   | 152.164 | 4.292            | NEMVAD   | 151.966 | 4.012            |
| ADUGAK   | 152.377 | 4.094            | SASGEY   | 152.157 | 3.06             | LAVWIO   | 151.965 | 4.39             |
| UFAGAK   | 152.371 | 4.011            | DUCKIW   | 152.152 | 4.375            | ZITSAY   | 151.959 | 4.329            |
| FODZAA   | 152.369 | 4.327            | BIZFUL   | 152.151 | 4.323            | WIGLAA   | 151.95  | 4.013            |
| KEDQOB   | 152.364 | 4.13             | GAKQER   | 152.143 | 4.284            | RUNSOI   | 151.939 | 4.376            |
| DILBIK   | 152.357 | 3.685            | ARAFOQ   | 152.133 | 3.776            | QIDQIH   | 151.938 | 4.353            |
| LUJQIS   | 152.349 | 3.867            | DAXXAE   | 152.13  | 3.731            | TIBQAA   | 151.935 | 4.285            |
| ZZZDVY03 | 152.346 | 4.348            | JUFVIS   | 152.129 | 4.184            | BEMPIU   | 151.932 | 3.825            |
| VEVVID   | 152.344 | 4.264            | UYUBAS   | 152.127 | 4.248            | MATVAG   | 151.931 | 3.741            |
| KEDQOB   | 152.336 | 4.262            | GAKQER   | 152.123 | 3.838            | JOXGIP   | 151.925 | 3.706            |
| QEHVUW   | 152.334 | 4.38             | ITOBZ    | 152.119 | 2.756            | GAYZIP01 | 151.922 | 3.894            |
| WUYHUU   | 152.329 | 4.298            | KEMKIX   | 152.117 | 4.179            | UNAGOH   | 151.922 | 3.788            |
| VEHLUQ   | 152.327 | 3.789            | MONDUQ   | 152.116 | 4.292            | GUPBOK   | 151.91  | 4.335            |
| FUBTIF   | 152.327 | 3.559            | LULWUM   | 152.112 | 4.122            | DUCJAN   | 151.904 | 4.34             |
| CABPEE   | 152.323 | 4.1              | NEYSUH   | 152.109 | 3.493            | NAFHAE   | 151.901 | 4.41             |
| QAKLEU   | 152.318 | 4.104            | XAPXOB   | 152.109 | 4.214            | JITRIR   | 151.889 | 3.941            |
| ASUXUJ   | 152.316 | 3.901            | SIXTAV   | 152.107 | 4.33             | SESPIQ   | 151.882 | 4.295            |
| XIMWAS   | 152.313 | 4.374            | CODVAV   | 152.103 | 3.851            | EYERAB   | 151.881 | 3.865            |
| MUVVUW   | 152.307 | 3.943            | SEQRIS   | 152.094 | 4.033            | WETFOT   | 151.88  | 4.243            |
| DUCHUF   | 152.306 | 4.347            | ZZZDVY03 | 152.093 | 3.804            | NIYNUG   | 151.879 | 4.169            |
| NIXKEM   | 152.304 | 3.934            | OYOWIL   | 152.086 | 4.1              | EYURUN   | 151.876 | 4.056            |
| OXUYOX   | 152.3   | 3.815            | EDUBEM   | 152.08  | 4.027            | NOPRAM   | 151.876 | 4.214            |
| TUFJAG   | 152.296 | 4.304            | GIZGAA   | 152.073 | 3.696            | NELHUJ   | 151.874 | 4.137            |
| QIDRAA   | 152.292 | 4.228            | ASIZAG   | 152.072 | 4.267            | UYAJIO   | 151.869 | 4.275            |
| KUBTIL   | 152.279 | 4.242            | IBIDAY   | 152.066 | 3.808            | SIKBIZ   | 151.864 | 4.157            |
| DUCJUH   | 152.277 | 4.373            | AQUHIG   | 152.065 | 3.589            | BUYBED   | 151.859 | 4.158            |
| LABQIQ   | 152.267 | 4.242            | EPEYII   | 152.064 | 4.276            | DEKGAD   | 151.849 | 4.134            |
| IFIXAW   | 152.26  | 4.363            | OPICOI   | 152.06  | 4.371            | FIKNIX   | 151.847 | 4.112            |
| YELHAB   | 152.247 | 4.033            | JOMGOK   | 152.05  | 3.894            | XOQXEH   | 151.843 | 3.926            |
| MIXLAI   | 152.246 | 4.167            | UNAGUN   | 152.05  | 3.782            | ULEXER   | 151.842 | 4.305            |
| QARVIP   | 152.242 | 4.167            | GIBROA   | 152.046 | 3.896            | RAGVIH   | 151.813 | 4.404            |
| GIZGAA   | 152.242 | 4.32             | QUBLAB   | 152.041 | 4.146            | KUJCIE   | 151.808 | 4.194            |
| JURQAQ   | 152.238 | 3.702            | IJEXOL   | 152.038 | 4.407            | TEHDOA   | 151.8   | 3.462            |
| MUVVUW   | 152.238 | 3.873            | TOHYUM   | 152.023 | 3.797            | RABCEE   | 151.794 | 4.201            |
| REXPES   | 152.236 | 4.158            | JOMGOK   | 152.02  | 3.983            | YEPLIR   | 151.793 | 3.804            |
| CIHWEX   | 152.232 | 3.752            | QEDPIB   | 152.016 | 4.408            | ZOGNER   | 151.786 | 3.961            |
| BIBGOJ   | 152.227 | 4.123            | WOHQIV   | 152.015 | 4.41             | NOLXOD   | 151.784 | 4.265            |

| Refcodes | ∠YZnO   | d <sub>ZnO</sub> | Refcodes | ∠YZnO   | d <sub>ZnO</sub> | Refcodes | ∠YZnO   | d <sub>ZnO</sub> |
|----------|---------|------------------|----------|---------|------------------|----------|---------|------------------|
| CEAMZN   | 152.218 | 4.136            | LAVWIO   | 152.012 | 3.658            | CEVYIM   | 151.766 | 4.202            |
| XOMMIX   | 152.2   | 4.031            | VIVXOO   | 152.007 | 4.155            | LAVWIO   | 151.766 | 4.09             |
| ALERAM   | 152.197 | 3.73             | CEPBOR   | 151.999 | 4.129            | EXOFAZ   | 151.763 | 3.822            |
| ACOGOP   | 152.197 | 4.41             | KALJEN   | 151.998 | 4.374            | VAJLID   | 151.763 | 3.004            |
| NOPCOK   | 152.194 | 3.95             | EYURUN   | 151.992 | 3.702            | XOQZUZ   | 151.763 | 4.144            |
| JIQPAA   | 152.192 | 4.056            | DAGXUF   | 151.989 | 4.132            | KIXLAG   | 151.762 | 3.778            |
| EBIPUC   | 152.189 | 3.628            | TUFLOW   | 151.987 | 3.94             | LAXSAH   | 151.758 | 4.19             |
| DEBSUZ   | 151.755 | 3.929            | EWOHUU   | 151.461 | 4.2              | MOLQOV   | 151.195 | 4.113            |
| RIFNAW   | 151.73  | 4.088            | KOZJUH   | 151.453 | 4.153            | VUNJAR   | 151.187 | 4.091            |
| HISWAK   | 151.724 | 4.121            | XUNWIM   | 151.448 | 4.211            | OYOWEH   | 151.185 | 4.095            |
| ISEMEZ   | 151.721 | 4.317            | ROBCIU   | 151.445 | 3.566            | FUPQOW   | 151.18  | 4.256            |
| VOQVOO   | 151.712 | 3.13             | HUKSAK   | 151.437 | 3.043            | MOJZUG   | 151.18  | 3.654            |
| AJOSUN   | 151.702 | 4.25             | RORSEY   | 151.428 | 3.756            | TUFLOW   | 151.179 | 4.027            |
| AMERIT   | 151.678 | 4.274            | TOLMUF   | 151.425 | 4.28             | RERKUW   | 151.17  | 4.198            |
| EWUXIF   | 151.678 | 3.77             | ROFLUW   | 151.422 | 4.176            | CEAMZN01 | 151.168 | 4.124            |
| RIPLEJ   | 151.676 | 4.033            | SUYBIA   | 151.417 | 4.361            | TEHDOA   | 151.159 | 4.088            |
| USATIS   | 151.674 | 3.81             | IBONOD   | 151.417 | 4.335            | MIPYEQ   | 151.158 | 4.164            |
| EDUBEM01 | 151.661 | 4.027            | LUGTAJ   | 151.414 | 3.775            | WEZNUM   | 151.144 | 4.217            |
| YAXNIX   | 151.647 | 4.135            | UBOYOC   | 151.395 | 3.585            | ISODOJ   | 151.14  | 4.391            |
| RORSOI   | 151.647 | 3.793            | IDUJAT   | 151.394 | 4.402            | TODJUT   | 151.136 | 3.383            |
| KOBKIY   | 151.643 | 4.125            | DUPRAI   | 151.386 | 4.299            | ASOYAK01 | 151.135 | 4.369            |
| NIQSUD   | 151.639 | 4.192            | VIWJIW   | 151.385 | 4.407            | LIWYAS   | 151.134 | 4.347            |
| QARVEL   | 151.633 | 3.849            | JUKHII   | 151.383 | 3.075            | KIWZOJ   | 151.124 | 4.201            |
| QAMLUL   | 151.624 | 4.067            | MOJKAY   | 151.365 | 4.292            | YUXRAM01 | 151.122 | 3.562            |
| CAPWAU   | 151.623 | 3.964            | RUHWIA   | 151.357 | 4.274            | EXETIN   | 151.12  | 4.046            |
| LEZCUR   | 151.619 | 4.18             | CAVVIG   | 151.345 | 3.701            | ASOYAK   | 151.119 | 4.364            |
| LOQFEE   | 151.613 | 4.285            | EMOTOQ   | 151.333 | 4.253            | EBUBOV01 | 151.118 | 3.415            |
| QIBZAG   | 151.612 | 4.171            | NAFYAX   | 151.332 | 4.279            | FUBTIF   | 151.118 | 3.723            |
| NEWVIU   | 151.609 | 3.164            | BUBDIN   | 151.332 | 4.171            | XEMYUM   | 151.117 | 3.972            |
| GIQZEP   | 151.605 | 4.101            | KIXVAS   | 151.323 | 4.037            | SENFUP   | 151.108 | 4.359            |
| HAHZEW   | 151.596 | 4.403            | DAMSUH   | 151.323 | 4.156            | YAXNIX   | 151.107 | 3.359            |
| DEHFUR   | 151.593 | 3.952            | URORAX   | 151.308 | 2.965            | WARCOJ   | 151.078 | 4.019            |
| AJOSUN01 | 151.591 | 4.22             | VIMNAJ   | 151.306 | 4.076            | SUYBEW   | 151.076 | 4.327            |
| UJEYIT   | 151.59  | 4.209            | HUPXUM   | 151.299 | 3.156            | XEPCOM   | 151.075 | 4.372            |
| XIDROS   | 151.589 | 3.986            | UPUSUU   | 151.295 | 4.234            | FOVGAZ   | 151.074 | 4.224            |
| PIDMEV01 | 151.588 | 3.866            | GETPEE   | 151.294 | 3.795            | QOLDIF   | 151.074 | 4.206            |
| TERQEM   | 151.588 | 3.992            | XIQFIO   | 151.294 | 4.237            | FEDYEU   | 151.057 | 4.247            |
| LISZEU   | 151.587 | 3.38             | CORCIX   | 151.293 | 4.248            | CAFSAF   | 151.053 | 4.078            |
| ISEMEZ   | 151.576 | 4.209            | XUHFOX   | 151.286 | 4.201            | DEHFUR01 | 151.045 | 4.05             |
| RUGYIE   | 151.569 | 4.078            | DURMAF   | 151.271 | 3.952            | VEHDER   | 151.04  | 4.283            |
| AYISEH01 | 151.561 | 3.792            | RAJDOX   | 151.27  | 4.354            | MOSNEN   | 151.039 | 3.889            |
| MARDAN   | 151.556 | 4.095            | UPUSUU03 | 151.268 | 4.24             | QEKQUW   | 151.034 | 4.101            |
| LELDEM   | 151.549 | 3.97             | NUDHEB   | 151.265 | 3.894            | FUPQOW   | 151.032 | 3.709            |
| XOLCEH   | 151.53  | 4.146            | EBUBEL   | 151.26  | 3.828            | EJINUH   | 151.025 | 3.922            |
| NENXUC   | 151.527 | 3.276            | QUBKII   | 151.259 | 4.207            | NEPLIE   | 151.024 | 4.211            |
| OPIRAJ   | 151.526 | 4.373            | GAYZIP   | 151.25  | 3.859            | LACGAA01 | 151.02  | 4.026            |
| VAJLUP   | 151.525 | 4.358            | UNECUN   | 151.249 | 4.058            | WEMZUJ   | 151.012 | 4.21             |
| KEMKET   | 151.523 | 4.137            | UZOCUK   | 151.242 | 3.11             | BOJVUR   | 151.011 | 3.958            |
| KUBVOU   | 151.5   | 4.16             | UPUSUU04 | 151.241 | 4.227            | BOFGEL   | 151.009 | 3.692            |
| UJAPOL   | 151.499 | 3.958            | UWADUT01 | 151.232 | 4.114            | ERIRAZ   | 151.008 | 4.079            |
| OPIFIE   | 151.492 | 2.875            | WENTAN01 | 151.221 | 4.204            | LOCVIL   | 150.995 | 3.94             |
| ASOYAK02 | 151.489 | 4.377            | OHALAL   | 151.22  | 4.299            | BULFIZ   | 150.992 | 3.26             |
| NECVAT   | 151.474 | 4.387            | RAMGES   | 151.219 | 4.295            | YEYFIT   | 150.99  | 4.248            |
| ELAMOW   | 151.473 | 4.066            | VETNAK01 | 151.198 | 3.978            | KIBZAX   | 150.975 | 3.644            |
| ANOREB   | 151.473 | 4.024            | WENTAN   | 151.196 | 4.207            | MOJKAY   | 150.97  | 4.327            |
| KIWZOJ   | 151.465 | 4.142            | ELAMUC   | 151.196 | 4.118            | SIXJIV   | 150.967 | 3.962            |
| EJINOB   | 150.959 | 3.915            | LARLUN   | 150.679 | 4.227            | FODNAQ   | 150.467 | 4.167            |
| DEDNAF   | 150.958 | 4.163            | ISEMEZ   | 150.67  | 3.894            | CAYFUE   | 150.467 | 3.974            |
| FEYQAD   | 150.953 | 3.815            | GARWIH   | 150.668 | 4.002            | ITOBENZ  | 150.466 | 4.057            |

| Refcodes  | ∠YZnO   | d <sub>ZnO</sub> | Refcodes | ∠YZnO   | d <sub>ZnO</sub> | Refcodes | ∠YZnO   | d <sub>ZnO</sub> |
|-----------|---------|------------------|----------|---------|------------------|----------|---------|------------------|
| QOFKIF    | 150.938 | 4.264            | QAYWUM   | 150.667 | 4.048            | QITDAA01 | 150.459 | 4.378            |
| PEMBOY    | 150.929 | 4.344            | AYISEH   | 150.656 | 3.827            | NENXUC   | 150.45  | 2.964            |
| KIJKEW    | 150.925 | 3.778            | PAWDOK   | 150.652 | 4.006            | DUJTIO   | 150.441 | 3.629            |
| NOKDIA    | 150.91  | 3.988            | XIKWEU   | 150.645 | 4.324            | BIZFUL   | 150.428 | 4.403            |
| TUFJAG    | 150.91  | 4.368            | CIVQEG   | 150.641 | 4.299            | EBUBOV   | 150.425 | 3.393            |
| ADOKEN    | 150.908 | 4.323            | TAPRIO   | 150.639 | 4.241            | ISODOJ   | 150.425 | 4.309            |
| SIJHUR    | 150.892 | 4.348            | ASEROI   | 150.63  | 4.023            | KEMKIX   | 150.411 | 4.342            |
| MAZLOO    | 150.889 | 4.286            | WETFOT   | 150.626 | 4.287            | DUGYUA   | 150.399 | 4.05             |
| UDIRUW    | 150.888 | 3.914            | PUMGOV   | 150.624 | 4.309            | ESoyUG   | 150.398 | 4.199            |
| YORQII    | 150.886 | 4.019            | VEtNAK   | 150.624 | 4.063            | ICUDIU   | 150.397 | 4.065            |
| LEZCUR    | 150.883 | 4.038            | UTEJUZ   | 150.621 | 4.084            | MUVVUW   | 150.375 | 3.996            |
| DARPET    | 150.881 | 4.011            | TIRHIN   | 150.621 | 4.14             | ERIKOG   | 150.367 | 3.858            |
| HAILOV    | 150.877 | 3.147            | FONNUR   | 150.619 | 3.895            | AVOKOM   | 150.355 | 4.329            |
| WUJRUP    | 150.877 | 4.173            | MUDKOM   | 150.618 | 3.912            | JAHNOY   | 150.347 | 4.289            |
| UGEZEN    | 150.876 | 4.359            | PEMBOY   | 150.617 | 4.301            | QANZEL   | 150.347 | 4.387            |
| LOXZED    | 150.875 | 4.404            | ESoyUG01 | 150.617 | 4.186            | RATXAN   | 150.346 | 4.22             |
| GICMAI    | 150.871 | 3.648            | MOJKAY   | 150.614 | 4.136            | ETUXUM   | 150.334 | 4.399            |
| PAFWWEY   | 150.864 | 4.397            | LASMEZ   | 150.605 | 4.288            | WECKOH   | 150.334 | 4.231            |
| PAFWWEY10 | 150.864 | 4.397            | RAXNAH   | 150.598 | 4.083            | JOBPUL   | 150.331 | 3.813            |
| JAHZOI    | 150.853 | 4.264            | BASZUU   | 150.596 | 4.182            | REcxUU   | 150.33  | 4.076            |
| FEJJOV    | 150.837 | 4.237            | SINXEU   | 150.596 | 4.104            | REFLEV   | 150.319 | 4.336            |
| QEXMEO    | 150.835 | 4.138            | MOTTUM   | 150.581 | 4.138            | QAPBER   | 150.312 | 4.042            |
| WALBOC02  | 150.835 | 4.155            | FIZGUT   | 150.58  | 4.006            | WEYHEP   | 150.308 | 4.168            |
| ESoyUG    | 150.813 | 4.173            | AFIQUB   | 150.58  | 3.854            | ZIHQIU   | 150.308 | 4.385            |
| OZUNEF    | 150.801 | 3.613            | IJEDOR   | 150.57  | 3.974            | ELUKII   | 150.302 | 4.192            |
| ASEROI    | 150.797 | 3.228            | VIGBAQ   | 150.57  | 3.857            | VUYBEX   | 150.3   | 4.287            |
| MEZNIR    | 150.793 | 3.824            | LASMEZ   | 150.569 | 4.075            | NANHAO   | 150.3   | 4.211            |
| NACZIE    | 150.784 | 3.936            | SUYBEW   | 150.565 | 4.33             | XAGNEZ   | 150.3   | 3.97             |
| NEZDEB    | 150.775 | 4.144            | SUWBOC   | 150.564 | 4.074            | SOTJAN   | 150.296 | 3.814            |
| QARVEL01  | 150.764 | 3.872            | UMIQOW   | 150.562 | 4.126            | KEBGIK   | 150.296 | 3.489            |
| BUYBAZ    | 150.757 | 4.161            | RAJDOX   | 150.559 | 4.082            | OQEZER   | 150.287 | 4.03             |
| REGQUT    | 150.747 | 4.394            | XIDJUR   | 150.558 | 3.984            | IDAVAN   | 150.284 | 3.84             |
| BUYBAZ    | 150.747 | 4.068            | WOJJEK   | 150.553 | 4.387            | HIYXIZ   | 150.274 | 4.229            |
| KIWZOJ    | 150.719 | 3.963            | RUZSUA   | 150.553 | 4.275            | LUMLUC   | 150.272 | 3.75             |
| LOZQEY    | 150.713 | 4.293            | LESGOI   | 150.552 | 3.982            | KUBVOU   | 150.265 | 4.223            |
| QUCGAY01  | 150.71  | 3.949            | NACHOR   | 150.543 | 4.338            | WEBRAZ   | 150.256 | 3.828            |
| VUNJIY    | 150.698 | 4.026            | HUDMOJ   | 150.539 | 3.753            | OFUGAY   | 150.248 | 4.271            |
| IREYOW    | 150.698 | 4.003            | KEMKET   | 150.524 | 4.207            | NACZIE   | 150.245 | 3.356            |
| HYZCZN    | 150.698 | 4.025            | VAJHIA   | 150.523 | 3.182            | ELAMOW   | 150.232 | 4.028            |
| CEBCUJ    | 150.695 | 4.354            | DAYPOK   | 150.517 | 4.298            | HENYUV   | 150.23  | 4.307            |
| NUDNIL    | 150.695 | 3.736            | ZIDBUN   | 150.509 | 3.2              | MUHVIW   | 150.228 | 3.188            |
| TAPREK    | 150.691 | 4.244            | ELUKOO   | 150.508 | 4.195            | JEVCAP   | 150.222 | 3.731            |
| NARKEA    | 150.689 | 4.244            | XUXQEN   | 150.503 | 4.383            | SIXJER   | 150.219 | 3.909            |
| IDOHEs    | 150.689 | 3.821            | UWABEB   | 150.499 | 4.401            | SARCIA   | 150.218 | 4.375            |
| PIKYOY    | 150.685 | 4.094            | KOBKIY   | 150.481 | 4.087            | GANGIM   | 150.215 | 4.397            |
| ZAJKOO    | 150.685 | 4.398            | WOMWIH   | 150.478 | 4.38             | KUPHEL   | 150.212 | 4.161            |
| VIRLAK    | 150.201 | 3.349            | VELROV   | 149.919 | 4.151            | PATZUF   | 149.686 | 4.365            |
| BIZFUL    | 150.196 | 4.383            | XAPXOB   | 149.914 | 4.143            | KAPWUV   | 149.685 | 4.21             |
| QOFKIF    | 150.192 | 3.959            | XIDBOF   | 149.914 | 4.334            | JAKPAN   | 149.679 | 3.218            |
| FALMUC    | 150.19  | 4.183            | SINWUI   | 149.907 | 4.061            | MOJKAY   | 149.673 | 3.887            |
| VUFJUB    | 150.189 | 4.359            | FUPQOW   | 149.895 | 4.38             | PAYCAX   | 149.669 | 3.597            |
| OFUGAY    | 150.173 | 4.325            | YOvBIW   | 149.883 | 4.168            | AWUCUQ   | 149.668 | 4.163            |
| MEMNUN    | 150.171 | 4.332            | ZUJZUB   | 149.868 | 4.076            | LASMEZ   | 149.661 | 4.287            |
| DEHFUR01  | 150.166 | 4.216            | DAPPAM   | 149.864 | 4.106            | ISOKOQ   | 149.648 | 3.951            |
| IXACUF    | 150.161 | 4.05             | ACOGOP   | 149.862 | 3.921            | XUSGUN   | 149.64  | 4.258            |
| YEYVEH    | 150.152 | 4.017            | QANCAJ   | 149.856 | 3.6              | PENQIK   | 149.637 | 4.06             |
| QUCGAY    | 150.146 | 3.917            | SERIZN10 | 149.85  | 3.786            | RUCMAE01 | 149.636 | 3.748            |
| PIJBAM    | 150.144 | 4.337            | XINZUR   | 149.849 | 4.321            | IFIXAW   | 149.634 | 4.301            |
| OGUQAL    | 150.139 | 3.893            | KEPGOF   | 149.848 | 4.109            | FEQVEE   | 149.633 | 4.291            |

| Refcodes | ∠YZnO   | d <sub>ZnO</sub> | Refcodes | ∠YZnO   | d <sub>ZnO</sub> | Refcodes | ∠YZnO   | d <sub>ZnO</sub> |
|----------|---------|------------------|----------|---------|------------------|----------|---------|------------------|
| SUPLAR   | 150.135 | 4.051            | LUJQIS01 | 149.846 | 3.825            | BOFGEL   | 149.629 | 3.889            |
| QOMFEF   | 150.131 | 3.993            | BIMMAO   | 149.842 | 4.384            | WERJOT   | 149.618 | 4.027            |
| BINBAE   | 150.102 | 4.37             | XUYXEV   | 149.835 | 4.009            | KEDQER   | 149.61  | 3.892            |
| RESSUH   | 150.079 | 4.376            | VIQYEA   | 149.834 | 4.327            | SUVPEH   | 149.6   | 3.954            |
| IZAPAD   | 150.06  | 3.948            | YIMWAU   | 149.828 | 3.807            | MOSNOX   | 149.593 | 3.774            |
| QAPBIV   | 150.058 | 4.051            | CERGAI   | 149.822 | 4.164            | CERGAI   | 149.59  | 4.247            |
| DATFUZ   | 150.056 | 4.2              | EKOZUA   | 149.818 | 4.295            | LETROV   | 149.587 | 4.065            |
| IGAWET   | 150.055 | 4.215            | ZZZDVY02 | 149.81  | 3.994            | COGLES   | 149.586 | 4.38             |
| KOZJUH   | 150.051 | 3.955            | BOBHEF   | 149.807 | 3.712            | MULQOA   | 149.584 | 4.197            |
| ZIWROP   | 150.041 | 3.975            | VAJLID   | 149.792 | 3.145            | DUNXUH   | 149.57  | 3.961            |
| KEMKET   | 150.036 | 4.346            | EQRUP    | 149.789 | 3.985            | MIQVEP   | 149.565 | 4.153            |
| MAQLEY   | 150.034 | 4.09             | SUWBOC   | 149.782 | 4.162            | EQOZOB   | 149.548 | 4.221            |
| RAXNAH   | 150.034 | 4.23             | IXELOO   | 149.773 | 4.381            | NIPWIT   | 149.545 | 4.296            |
| HENYUV01 | 150.018 | 4.26             | XAGNEZ   | 149.773 | 4.031            | CEZVIO   | 149.545 | 4.402            |
| SINXEU   | 150.012 | 4.158            | SUYBIA   | 149.766 | 3.864            | EVURUJ   | 149.543 | 4.364            |
| OVIDEF   | 150.009 | 4.32             | BOFVAU   | 149.761 | 4.12             | ZZZDVY03 | 149.54  | 4.054            |
| TISGOR   | 150.009 | 3.855            | SITCIH   | 149.758 | 3.995            | XIYBUE   | 149.532 | 3.593            |
| NEKXOU   | 150.007 | 4.318            | DUDRIG   | 149.751 | 4.385            | UHEZIT   | 149.514 | 4.001            |
| MIQVAL   | 150.003 | 4.17             | MOHRAD   | 149.747 | 3.921            | IKACAA   | 149.514 | 4.182            |
| ESASUN   | 149.999 | 3.878            | TIVJIT   | 149.747 | 4.154            | NOHFAU   | 149.51  | 3.869            |
| QOFKIF   | 149.985 | 4.332            | NOPCUQ   | 149.736 | 3.839            | ETAPOG   | 149.506 | 3.936            |
| QOMFEF   | 149.979 | 4.098            | UMAMED   | 149.73  | 3.898            | MIYMUC   | 149.5   | 4.109            |
| DUDROM   | 149.976 | 4.385            | QEHZAH   | 149.728 | 4.119            | COVQIQ   | 149.5   | 4.117            |
| KEDQUH   | 149.975 | 4.018            | ROBCIU   | 149.724 | 4.277            | KEKHEP   | 149.499 | 4.188            |
| KIFNEV   | 149.954 | 3.896            | DAGXUF   | 149.722 | 4.127            | ROBCEQ   | 149.499 | 3.755            |
| JOHLUQ   | 149.951 | 4.007            | MAZLOO   | 149.716 | 3.732            | PUMGOV   | 149.49  | 4.269            |
| DITWEL   | 149.95  | 4.353            | ADECAP   | 149.715 | 3.982            | PIJBAM   | 149.487 | 4.033            |
| IDOHES   | 149.95  | 3.031            | IFIYIG   | 149.711 | 4.103            | EFUJIA   | 149.486 | 3.995            |
| BEPLUF   | 149.949 | 4.115            | ESIWEK   | 149.71  | 3.614            | ROBCEQ   | 149.483 | 3.757            |
| MUJQAL   | 149.946 | 4.373            | DATFUZ   | 149.705 | 4.188            | NERQAC   | 149.477 | 3.948            |
| LASMEZ   | 149.943 | 4.143            | DAGYAM   | 149.702 | 4.088            | CAVVIG   | 149.469 | 4.108            |
| CORCIX   | 149.938 | 4.316            | NEKPOK   | 149.691 | 4.327            | MIVDEB   | 149.46  | 4.245            |
| CABPEE   | 149.932 | 3.983            | WUPTAE   | 149.69  | 3.825            | MIGNUN   | 149.46  | 4.257            |
| TESNUC   | 149.931 | 4.243            | SUYBEW   | 149.688 | 3.854            | BUZGUZ   | 149.446 | 4.163            |
| WUXVUH   | 149.928 | 4.315            | BUBDIN   | 149.688 | 3.807            | WIJDAV   | 149.436 | 3.768            |
| TIPJEL   | 149.927 | 4.175            | YIMKEM   | 149.687 | 3.874            | EVUJUD   | 149.435 | 3.97             |
| SAMSIL   | 149.43  | 3.963            | WARCOJ   | 149.2   | 4.25             | TIVJIT   | 149.006 | 4.379            |
| DEKLOY   | 149.429 | 4.37             | MAKSOI   | 149.196 | 3.2              | DEHPOX   | 149.006 | 3.848            |
| QIBNOE   | 149.426 | 4.216            | SIGZEQ   | 149.193 | 4.159            | ADECET   | 149.004 | 4.355            |
| SUSWAF   | 149.424 | 3.845            | FEFVAO   | 149.192 | 4.408            | XUSGUN   | 149.003 | 4.038            |
| BASZUU   | 149.424 | 3.519            | YILBIG   | 149.19  | 3.125            | NIPWIT01 | 148.996 | 4.264            |
| LICXED   | 149.419 | 4.053            | VOWXIO   | 149.186 | 4.147            | RUNSOI   | 148.995 | 4.032            |
| ZZZDVY04 | 149.417 | 4.024            | KEHNIW   | 149.185 | 4.334            | PIJKAV   | 148.995 | 3.489            |
| DUNXUH06 | 149.41  | 3.967            | GUVFUY   | 149.183 | 4.379            | BAMWOD   | 148.993 | 4.242            |
| WEBRUT   | 149.408 | 4.196            | OHUQAJ   | 149.182 | 4.014            | DOMYUC01 | 148.983 | 4.124            |
| XIYZUA   | 149.408 | 3.694            | DATFUZ   | 149.18  | 4.294            | TEJFIA   | 148.975 | 4.355            |
| DUNXUH15 | 149.408 | 4.002            | HAWFEU   | 149.178 | 3.493            | FUJBET   | 148.974 | 3.937            |
| SARXAO   | 149.405 | 4.252            | NUDNIL   | 149.175 | 3.903            | FUPQOW   | 148.971 | 3.608            |
| BEPJOY   | 149.401 | 4.008            | QUBLAB   | 149.169 | 3.854            | TAZJAH   | 148.968 | 4.049            |
| TIQBEB   | 149.379 | 3.821            | QEXMEO   | 149.166 | 3.983            | LOJFAT   | 148.959 | 4.061            |
| OZUNEF   | 149.377 | 3.614            | VETNAK01 | 149.166 | 3.809            | ZIRNUM   | 148.959 | 4.311            |
| OZUNEF   | 149.376 | 3.762            | VOJMEP   | 149.163 | 4.126            | FAQFAI   | 148.95  | 3.927            |
| EKOZUA   | 149.374 | 4.111            | QORKIR   | 149.161 | 4.141            | KOZLIX   | 148.946 | 4.343            |
| HUPSIV   | 149.374 | 4.357            | BOTPOQ   | 149.157 | 4.149            | KEDQER   | 148.944 | 3.816            |
| MOJZUG   | 149.368 | 4.401            | JETGAU   | 149.156 | 4.082            | XIDHUP   | 148.943 | 4.04             |
| NITTIT   | 149.368 | 3.734            | CAWLIY   | 149.129 | 3.907            | KOTTEU   | 148.929 | 4.273            |
| DOSVAJ   | 149.365 | 4.307            | MEMPAV   | 149.126 | 3.696            | MIYMUC   | 148.923 | 4.105            |
| FOXMIQ   | 149.355 | 4.06             | KUBVOU   | 149.126 | 4.155            | UFEBIT   | 148.921 | 3.976            |
| XAMSUC   | 149.354 | 3.957            | DUNXUH14 | 149.126 | 3.948            | PEGBEL   | 148.915 | 3.211            |

| Refcodes | ∠YZnO   | d <sub>ZnO</sub> | Refcodes | ∠YZnO   | d <sub>ZnO</sub> | Refcodes | ∠YZnO   | d <sub>ZnO</sub> |
|----------|---------|------------------|----------|---------|------------------|----------|---------|------------------|
| FUNPOW   | 149.354 | 4.231            | LEWFAV   | 149.123 | 4.283            | FUJNAB   | 148.907 | 3.543            |
| TUYGAX01 | 149.338 | 3.763            | IREYOW   | 149.122 | 3.718            | ONIWAK   | 148.901 | 3.873            |
| PIJKAV   | 149.327 | 2.997            | TAXLIO   | 149.111 | 4.255            | JUJQEK   | 148.893 | 4.126            |
| EPEHOZ   | 149.322 | 4.192            | OFUNOW   | 149.109 | 4.102            | GERPID01 | 148.892 | 4.192            |
| FAHJII   | 149.316 | 4.149            | DATVUQ   | 149.105 | 3.5              | LAFXUP   | 148.891 | 3.51             |
| MIXTAP   | 149.31  | 3.799            | LMETZN   | 149.105 | 3.608            | WUXVOB   | 148.889 | 4.131            |
| COYHIJ   | 149.298 | 4.142            | ACENIF   | 149.099 | 3.121            | PENPAD01 | 148.888 | 3.725            |
| TUYGAX   | 149.297 | 3.767            | LITDAV   | 149.094 | 4.304            | ABOWUL   | 148.88  | 3.889            |
| TUYGAX02 | 149.286 | 3.771            | QENFAR   | 149.089 | 4.264            | FUJBOD   | 148.879 | 3.912            |
| CUWNOA   | 149.277 | 3.273            | NEZDEB   | 149.087 | 4.082            | DUNXUH13 | 148.874 | 3.93             |
| FASWED   | 149.277 | 4.249            | TOKZIF   | 149.082 | 4.249            | JONNUY   | 148.863 | 3.753            |
| DAPNAL   | 149.276 | 3.904            | REJXOX   | 149.078 | 4.066            | YIMQES   | 148.859 | 3.921            |
| MAKSUN   | 149.275 | 3.957            | DEPYIH   | 149.076 | 4.365            | JETGEY   | 148.857 | 3.8              |
| HIQVUZ   | 149.272 | 4.021            | GIXPAG   | 149.054 | 3.957            | AZUCIH   | 148.853 | 4.388            |
| UGEZIR   | 149.262 | 4.38             | QITRET   | 149.052 | 3.715            | KUBVIO   | 148.827 | 3.995            |
| DISWOU   | 149.26  | 4.257            | UKEHOJ   | 149.05  | 4.361            | REPQEM   | 148.819 | 3.902            |
| FUNPOW01 | 149.255 | 4.236            | ISEMEZ   | 149.049 | 4.007            | TEBDOT   | 148.813 | 3.733            |
| VEXTUP   | 149.25  | 4.381            | DUNXUH12 | 149.048 | 3.9              | XEPCOM   | 148.808 | 4.196            |
| MOJZUG   | 149.25  | 3.971            | KELTUR   | 149.041 | 3.922            | GIQZUF   | 148.804 | 4.109            |
| IVOXAT   | 149.248 | 4.316            | FURDEB   | 149.041 | 4.184            | FODMUJ   | 148.799 | 3.26             |
| QIBNOE02 | 149.248 | 4.221            | WOSBUB   | 149.04  | 4.251            | FEDYEU   | 148.79  | 4.203            |
| UQULUQ   | 149.24  | 3.998            | URISOG   | 149.038 | 3.256            | MUFCAT   | 148.778 | 3.687            |
| DUNXUH08 | 149.231 | 4.066            | QALHET   | 149.038 | 4.383            | EMOTOQ   | 148.768 | 4.268            |
| DUNXUH21 | 149.217 | 4.066            | AFIQUB   | 149.031 | 3.956            | KARDEM   | 148.765 | 4.355            |
| QIBNOE01 | 149.209 | 4.216            | BONVOQ   | 149.03  | 4.062            | TIVJIT   | 148.759 | 4.275            |
| ARAGUX   | 149.207 | 4.261            | XAMSIQ   | 149.022 | 4.12             | SOCGIB   | 148.758 | 4.38             |
| GIZFUT   | 148.749 | 3.696            | NORBUT   | 148.51  | 3.752            | CUNVAJ   | 148.298 | 4.121            |
| ZETKUG   | 148.747 | 4.176            | MOYNIA   | 148.506 | 3.994            | LERVOV   | 148.282 | 3.969            |
| CAGSAH   | 148.742 | 4.018            | COGLES   | 148.502 | 4.112            | ESIWEK   | 148.277 | 4.194            |
| IFIYIG   | 148.739 | 4.32             | WAQNAH   | 148.489 | 4.211            | UNIQEO   | 148.276 | 4.385            |
| SUVPEH   | 148.738 | 3.845            | IHOCIT01 | 148.487 | 4.132            | VETNAK   | 148.263 | 3.841            |
| FIPKUM   | 148.728 | 3.984            | RUVHOF   | 148.485 | 4.05             | WUDBOO   | 148.26  | 3.71             |
| PONVIA   | 148.727 | 3.955            | FAVRUT   | 148.479 | 3.818            | PICBAE   | 148.259 | 4.3              |
| MIPYIU   | 148.724 | 4.209            | AGUJUI   | 148.478 | 4.111            | IQIBAN   | 148.255 | 4.067            |
| RALZUD   | 148.714 | 4.303            | RUZQAE   | 148.476 | 4.331            | RUZQUY   | 148.242 | 3.893            |
| DAFYIW   | 148.71  | 4.261            | HUVHUD   | 148.472 | 4.229            | CEQJER   | 148.242 | 4.027            |
| KIWZOJ   | 148.708 | 4.338            | TAZJAH   | 148.472 | 4.406            | MAKYUS   | 148.235 | 4.305            |
| VOTJOG   | 148.706 | 4.301            | EQOVEL   | 148.47  | 3.917            | VENTOB   | 148.234 | 4.294            |
| EMEYUR   | 148.695 | 3.791            | EQEJEQ   | 148.468 | 4.383            | GIQFOF   | 148.232 | 3.794            |
| XOQXEH   | 148.694 | 3.738            | PUKYIG   | 148.46  | 4.397            | FASQUN   | 148.229 | 3.789            |
| GOHJEV   | 148.682 | 4.274            | FEQVEE   | 148.456 | 4.236            | WEWVOM   | 148.227 | 4.061            |
| CAPWAU   | 148.679 | 3.911            | ROMQAN   | 148.454 | 4.04             | WEMZUJ   | 148.224 | 4.239            |
| TUFTOF   | 148.679 | 4.234            | ULOWOH   | 148.451 | 3.922            | UVUFAU   | 148.209 | 3.673            |
| ACACZM   | 148.668 | 3.863            | LUNBIF   | 148.444 | 4.131            | ISEMEZ   | 148.208 | 4.38             |
| XACGUD   | 148.667 | 4.133            | TARYET   | 148.433 | 4.263            | EBUBEL   | 148.204 | 3.9              |
| EKOZUA   | 148.656 | 3.951            | TURMUP   | 148.428 | 3.864            | SOTJAN   | 148.203 | 4.363            |
| OHUQAJ   | 148.649 | 4.272            | QOMFEF   | 148.424 | 4.094            | ZOXTAJ   | 148.199 | 4.331            |
| TEFKEV   | 148.645 | 3.71             | PAKVOM   | 148.424 | 3.795            | CAYWEG   | 148.196 | 4.083            |
| QUDKOQ   | 148.642 | 4.166            | ISEMEZ   | 148.415 | 4.322            | IXOQAQ   | 148.195 | 4.387            |
| RORSEY   | 148.638 | 4.044            | KEHNIW   | 148.411 | 3.962            | WEZJAN   | 148.195 | 3.954            |
| RALZUD   | 148.638 | 3.722            | SIPJIL   | 148.405 | 3.929            | MULQOA   | 148.195 | 4.09             |
| KAPBEJ   | 148.637 | 4.099            | LAPZOV   | 148.393 | 4.164            | ZZZDVY04 | 148.191 | 4.332            |
| IZAPAD   | 148.628 | 3.783            | PICBAE   | 148.392 | 3.797            | ZINDAD   | 148.184 | 3.872            |
| CODVAV   | 148.628 | 4.139            | FUPQOW   | 148.384 | 4.304            | ASUWUI   | 148.182 | 4.073            |
| AWECUB01 | 148.627 | 3.82             | RAHFIP   | 148.382 | 2.698            | KEYLEG   | 148.175 | 4.333            |
| VOZCIY   | 148.619 | 4.355            | AXAVAZ   | 148.375 | 4.057            | GIYHED   | 148.172 | 3.864            |
| NARKEA   | 148.61  | 3.895            | LUNBIF   | 148.374 | 4.186            | FELPES   | 148.171 | 4.384            |
| RUWMED   | 148.603 | 4.044            | OMUVUO   | 148.368 | 4.017            | SOXVUY   | 148.17  | 4.206            |
| YUZQIV   | 148.598 | 4.075            | SABGEI   | 148.366 | 4.244            | ROBQAB   | 148.166 | 4.404            |

| Refcodes | $\angle YZnO$ | $d_{ZnO}$ | Refcodes | $\angle YZnO$ | $d_{ZnO}$ | Refcodes | $\angle YZnO$ | $d_{ZnO}$ |
|----------|---------------|-----------|----------|---------------|-----------|----------|---------------|-----------|
| FORWOA   | 148.581       | 3.601     | ZZZDVY02 | 148.364       | 4.297     | ULEXER   | 148.157       | 4.226     |
| CAHFOK   | 148.575       | 4.087     | SASGOJ   | 148.362       | 4.04      | WEZNUM   | 148.154       | 3.92      |
| REHGAN01 | 148.566       | 4.347     | WENDEA   | 148.357       | 4.069     | XEHFIC   | 148.151       | 4.11      |
| PUKYOM   | 148.564       | 4.39      | BOSQIK   | 148.355       | 4.105     | DEHFUR   | 148.147       | 4.32      |
| MUJHOP   | 148.556       | 4.103     | BABXEL   | 148.351       | 3.115     | BUQZOD   | 148.147       | 4.296     |
| ISEMEZ   | 148.546       | 4.087     | FEQVEE   | 148.345       | 3.836     | RAXNAH   | 148.141       | 4.348     |
| SEBBAF   | 148.537       | 2.998     | UFEBIT01 | 148.34        | 3.932     | OCOKUM   | 148.14        | 4.328     |
| PUYSUY   | 148.536       | 3.684     | CORCIX   | 148.332       | 4.091     | HAZYUE   | 148.138       | 3.778     |
| YOQYUZ   | 148.533       | 4.217     | ZEBKAS   | 148.332       | 4.161     | OJUHUV   | 148.133       | 4.264     |
| ROQKIT   | 148.531       | 3.284     | QIDRII   | 148.331       | 4.244     | XELNOS02 | 148.131       | 3.442     |
| QIJXUE   | 148.52        | 3.996     | QIDREE   | 148.327       | 4.233     | AWECUB   | 148.118       | 3.78      |
| GOVXEX   | 148.518       | 3.951     | LMETZN01 | 148.326       | 3.543     | LASMEZ   | 148.117       | 4.109     |
| LICXAZ   | 148.517       | 4.034     | KUBZIR   | 148.305       | 3.969     | SOQDAE   | 148.109       | 4.262     |
| DUFJUM   | 148.517       | 4.266     | YONNUL   | 148.303       | 4.079     | RORSEY   | 148.105       | 3.841     |
| JISNEF   | 148.515       | 3.946     | QOMTIV   | 148.302       | 4.128     | FUTYUQ   | 148.102       | 4.336     |
| REHGAN   | 148.513       | 4.349     | IFIXOK   | 148.3         | 3.807     | DIDTAP   | 148.096       | 3.806     |
| DAYPOK   | 148.094       | 4.174     | BUWCEE   | 147.828       | 4.106     | AGAWUA   | 147.624       | 3.968     |
| JETFUN   | 148.092       | 3.878     | LAHRET   | 147.815       | 4.11      | EFASUA   | 147.62        | 2.909     |
| ACACZM02 | 148.089       | 3.856     | WEMZUJ   | 147.813       | 4.164     | LIMDOE   | 147.612       | 4.113     |
| FUNBAU   | 148.088       | 4.099     | EHUXOX   | 147.81        | 4.232     | KUBSIK   | 147.598       | 4.351     |
| AQOHAQ   | 148.078       | 4.292     | FIQRUT   | 147.804       | 4.273     | SOFWAM   | 147.597       | 4.31      |
| XARZUN   | 148.077       | 3.907     | VIRLAK   | 147.803       | 3.994     | OFUNOW   | 147.596       | 3.659     |
| BIQHUI   | 148.076       | 4.213     | SEBBAF   | 147.798       | 4.366     | ZENHEI   | 147.592       | 4.165     |
| LOCWAE   | 148.074       | 3.791     | XELNOS   | 147.798       | 3.478     | JAMVOM   | 147.584       | 4.287     |
| DODJAK   | 148.073       | 4.168     | NEYBID   | 147.795       | 3.858     | DIMKAN   | 147.583       | 4.356     |
| GAKQIV   | 148.071       | 4.018     | SADFAH   | 147.793       | 3.715     | YACSEC   | 147.572       | 3.986     |
| MOJKAY   | 148.063       | 4.294     | MAZLOO   | 147.786       | 3.932     | SOXTAC   | 147.548       | 4.313     |
| DOSVAJ   | 148.057       | 3.769     | RENXOZ   | 147.783       | 3.38      | WUPTAE   | 147.547       | 3.889     |
| KIJKAS   | 148.052       | 4.156     | YUTTEN   | 147.782       | 4.318     | NEMTUV   | 147.544       | 3.836     |
| SOFFEA   | 148.05        | 3.634     | DUBMAR   | 147.772       | 3.854     | MALFOU   | 147.537       | 3.767     |
| XUGDEK   | 148.034       | 4.314     | TOTMIB   | 147.771       | 3.718     | MUJQAL   | 147.533       | 3.989     |
| EYERAB   | 148.029       | 3.951     | EFEBEA   | 147.77        | 4.374     | KUZLOI   | 147.529       | 4.211     |
| GICLUB   | 148.024       | 3.66      | LITHUU   | 147.76        | 4.208     | HIQMUR   | 147.527       | 3.856     |
| ROBQAB   | 148.013       | 4.156     | GERPID03 | 147.76        | 4.208     | SOWCOY   | 147.521       | 3.29      |
| RIPSAO   | 148.009       | 4.247     | WARDUP   | 147.753       | 3.76      | GOJWIM   | 147.518       | 4.268     |
| SEBBAF   | 148.009       | 2.891     | ZEJSUF   | 147.752       | 3.772     | ULIBOG   | 147.516       | 4.145     |
| LIJREC   | 148.003       | 4.365     | GASSUR   | 147.75        | 4.276     | PIDMEV01 | 147.512       | 4.17      |
| GIQFOF   | 147.99        | 4.139     | QEPRUC   | 147.74        | 4.284     | ZZZDVY03 | 147.512       | 4.358     |
| XELNOS01 | 147.989       | 3.462     | EHUXOX   | 147.737       | 4.23      | VEHLUQ   | 147.508       | 4.229     |
| SEBBAF   | 147.989       | 4.263     | GUCHAN01 | 147.733       | 4.105     | SENJEB   | 147.506       | 4.096     |
| PEGBEL   | 147.989       | 3.079     | WUBREQ   | 147.727       | 4.232     | GICLUB   | 147.501       | 3.953     |
| IWORET01 | 147.981       | 4.013     | ZEYFIV   | 147.725       | 4.208     | HAHCIF   | 147.497       | 4.38      |
| POMRIT   | 147.979       | 3.931     | XAXBIJ   | 147.722       | 3.972     | NEMVAD   | 147.492       | 4.289     |
| YEQSOF   | 147.976       | 4.294     | CEQJER   | 147.717       | 4.23      | IYOBUV   | 147.487       | 3.662     |
| XEFPII   | 147.975       | 4.192     | HUXDUC   | 147.712       | 4.132     | EVUSEU   | 147.481       | 4.183     |
| RANQAA   | 147.973       | 3.97      | EKOZUA   | 147.707       | 4.359     | POFCUJ   | 147.48        | 4.04      |
| BEWBAI   | 147.971       | 4.157     | SOXTUW   | 147.699       | 4.389     | SIJHUR   | 147.473       | 4.323     |
| NEPMIF   | 147.967       | 3.624     | NIDMOD   | 147.698       | 4.282     | DELTIY   | 147.472       | 4.329     |
| OHUQAJ   | 147.955       | 4.127     | TOLMUF   | 147.698       | 4.385     | ZOZYUK   | 147.466       | 4.35      |
| UGEZOX   | 147.954       | 4.334     | YUBZAX   | 147.689       | 3.964     | CIKQEW   | 147.465       | 4.319     |
| PIRFOL   | 147.954       | 3.594     | NAKTOM   | 147.688       | 4.283     | VIRLAK   | 147.464       | 4.397     |
| NABROY01 | 147.949       | 4.224     | SUVPEH   | 147.685       | 3.862     | SIYSUQ   | 147.452       | 3.697     |
| PIRFOL01 | 147.944       | 3.595     | IDUFUL   | 147.682       | 4.219     | AJIGEG   | 147.45        | 3.769     |
| GERPID02 | 147.933       | 4.233     | WENPIO   | 147.68        | 3.719     | DEFJII   | 147.448       | 4.261     |
| MAKSOI   | 147.914       | 3.058     | UQEDIE   | 147.675       | 4.371     | QETFIF   | 147.448       | 4.09      |
| GERPID   | 147.91        | 4.194     | IJOYEN   | 147.673       | 4.332     | OSACIX   | 147.447       | 3.881     |
| HULNOU   | 147.885       | 4.334     | BEQPAQ   | 147.672       | 4.151     | SEZMIW   | 147.432       | 4.357     |
| LINYIQ   | 147.882       | 4.387     | WAZVOM   | 147.67        | 4.388     | LERNAZ   | 147.427       | 3.642     |
| QIFKUP   | 147.873       | 3.973     | DAYPOK   | 147.66        | 4.065     | IVUTOJ   | 147.427       | 4.111     |



| Refcodes | ∠YZnO   | d <sub>ZnO</sub> | Refcodes | ∠YZnO   | d <sub>ZnO</sub> | Refcodes | ∠YZnO   | d <sub>ZnO</sub> |
|----------|---------|------------------|----------|---------|------------------|----------|---------|------------------|
| LAQJEV   | 147.872 | 4.008            | DOHBEI   | 147.657 | 3.69             | NUHYAR   | 147.426 | 4.38             |
| PEKTEG   | 147.869 | 3.95             | KENJUK   | 147.653 | 4.175            | QARVIP   | 147.425 | 3.613            |
| WARFAX   | 147.853 | 3.82             | GIQZEP   | 147.64  | 3.796            | LOGZAK   | 147.424 | 4.129            |
| GOCMIW   | 147.847 | 4.035            | OWUHOF   | 147.636 | 4.105            | FAMBIG   | 147.422 | 4.136            |
| CAFSEJ   | 147.836 | 4.121            | AXOCEW   | 147.634 | 3.043            | WAMZAN   | 147.404 | 4.131            |
| LIWXEV   | 147.83  | 4.125            | OXPAZN   | 147.628 | 3.349            | MEJMAT   | 147.397 | 4.268            |
| RAFZUV   | 147.393 | 3.413            | JOBYEG   | 147.183 | 4.165            | KUJNUB   | 146.996 | 3.919            |
| EFASUA   | 147.392 | 2.685            | BUBSOJ   | 147.18  | 4.336            | BEMHEI   | 146.992 | 4.279            |
| QAVBIA   | 147.389 | 4.237            | IQUMIQ   | 147.171 | 4.166            | OPIRAJ   | 146.981 | 3.785            |
| DIFVIB   | 147.379 | 4.237            | PENPAD   | 147.166 | 3.731            | FECHIG   | 146.98  | 4.249            |
| UZOKUR   | 147.377 | 4.057            | MEGNUK   | 147.161 | 3.257            | JETFUN   | 146.979 | 3.937            |
| BOMZEL   | 147.377 | 4.204            | YEQXEA   | 147.15  | 3.903            | CAQHAF   | 146.977 | 4.129            |
| IVAZUA01 | 147.374 | 4.082            | MAKSUN   | 147.148 | 4.212            | FAHJAB   | 146.971 | 4.1              |
| VIRLAK   | 147.372 | 3.267            | NAKTOM   | 147.144 | 3.859            | TAZJAH   | 146.97  | 4.017            |
| CAKSEO   | 147.363 | 4.288            | ZAQXEX   | 147.141 | 3.884            | DUJWEN   | 146.961 | 3.924            |
| MUZVOS   | 147.356 | 4.246            | ITIBAO   | 147.14  | 3.808            | NOVQOH   | 146.951 | 4.125            |
| SAHFEN   | 147.356 | 3.726            | TUXMIL   | 147.14  | 3.721            | FOJVUX   | 146.934 | 3.908            |
| DUWJUC   | 147.355 | 3.972            | GAPDAE   | 147.138 | 4.32             | ZEYFIV   | 146.932 | 4.177            |
| FONPUV   | 147.354 | 3.633            | SUWZOC   | 147.136 | 3.274            | FUPQOW   | 146.926 | 3.871            |
| PIDTOO   | 147.354 | 4.214            | IRUVUP   | 147.135 | 4.327            | ETUQEQ   | 146.924 | 2.985            |
| PETFON   | 147.343 | 3.782            | WIHMIK   | 147.118 | 4.01             | NAKPUM   | 146.916 | 4.091            |
| QUKRAS   | 147.343 | 3.784            | CACBEQ   | 147.111 | 3.386            | NAHGIO   | 146.911 | 3.704            |
| HIJSOI   | 147.342 | 3.957            | KUBTEH   | 147.11  | 4.08             | SIJLIH   | 146.9   | 4.232            |
| DAGYEQ   | 147.341 | 3.885            | BONVOQ   | 147.109 | 3.785            | PIJKAV   | 146.897 | 3.961            |
| BUBSOJ   | 147.34  | 4.152            | JOYZEE   | 147.108 | 4.067            | XIQFIO   | 146.895 | 4.206            |
| KIJKAS   | 147.327 | 4.233            | FUPQOW   | 147.108 | 4.231            | NIXKEM   | 146.89  | 3.523            |
| OFUGAY   | 147.318 | 4.36             | DIHNEO   | 147.107 | 3.918            | QEPRUC   | 146.889 | 3.881            |
| NACZIE   | 147.317 | 3.419            | FONPUV   | 147.105 | 3.889            | ZAWTOI   | 146.884 | 4.076            |
| XUGBOR   | 147.308 | 3.987            | SUSPOL   | 147.101 | 3.851            | YOLVED   | 146.882 | 3.803            |
| IDEFII   | 147.295 | 4.275            | SIJDOF   | 147.097 | 4.129            | IRUVUP   | 146.881 | 4.028            |
| YEFVAI   | 147.295 | 4.086            | FODXAA   | 147.096 | 4.29             | XEFPII   | 146.881 | 4.232            |
| POKQIS   | 147.28  | 4.015            | TADCUA   | 147.088 | 3.843            | JEMXUX   | 146.877 | 4.377            |
| PERZAN   | 147.279 | 4.083            | PEBNIV   | 147.086 | 4.357            | IVODEC   | 146.869 | 4.271            |
| FISCEQ   | 147.277 | 4.116            | GUCQIH   | 147.084 | 4.106            | WUWGON   | 146.868 | 3.999            |
| ZODGEH   | 147.274 | 3.9              | OPICOI   | 147.073 | 3.773            | DOVHEB   | 146.867 | 4.276            |
| HITVOZ   | 147.273 | 4.203            | BEMHAE   | 147.072 | 4.286            | QAKLEU   | 146.864 | 4.184            |
| MULKOT   | 147.272 | 3.875            | SIJLED   | 147.07  | 3.794            | UNECUN   | 146.862 | 4.252            |
| PUNQOF   | 147.269 | 4.168            | FORWOA   | 147.069 | 3.556            | SIYGAK   | 146.861 | 4.203            |
| EYURUN   | 147.259 | 4.315            | YEFKAY01 | 147.062 | 4.172            | YAYQOG   | 146.859 | 4.24             |
| TAMZEQ   | 147.249 | 4.192            | MOFWUA   | 147.06  | 4.116            | XEHYAM   | 146.848 | 4.327            |
| YEFKAY   | 147.247 | 4.18             | ROBCEQ   | 147.055 | 3.932            | RERKUW   | 146.841 | 4.246            |
| QORKIR   | 147.245 | 4.263            | FUJNAB   | 147.051 | 4.304            | WIPSUJ   | 146.821 | 4.312            |
| KEMKET   | 147.215 | 4.37             | MOJTAH   | 147.048 | 4.409            | CAMPOY   | 146.817 | 4.239            |
| COTJUT   | 147.214 | 4.326            | JEMYAE   | 147.041 | 4.375            | YENSEQ   | 146.816 | 4.402            |
| UJEYIT   | 147.214 | 3.933            | NAHJEN   | 147.037 | 4.377            | ATOWUE   | 146.806 | 4.239            |
| SOKZOJ   | 147.21  | 4.233            | FURDEB   | 147.03  | 3.556            | NESGAU   | 146.8   | 3.724            |
| PAVZES   | 147.206 | 4.405            | QEKNAZ   | 147.027 | 3.694            | GIZFAZ   | 146.798 | 3.818            |
| HUXDUC   | 147.205 | 4.129            | VIGFAW   | 147.02  | 4.343            | XECFUI   | 146.78  | 3.883            |
| QUIZAZ   | 147.202 | 4.073            | UTAZIB   | 147.018 | 4.327            | UZOCUK   | 146.779 | 3.205            |
| OFUGAY   | 147.196 | 3.911            | OXUYIR   | 147.015 | 4.106            | FAMBIG   | 146.775 | 4.404            |
| DAGYEQ   | 147.196 | 3.933            | XEJKIJ   | 147.012 | 4.315            | DEJLIO   | 146.769 | 3.932            |
| OCEYEB   | 147.194 | 4.41             | TOLMUF   | 147.01  | 4.097            | CEYSEF   | 146.764 | 4.104            |
| EHOLUJ   | 147.193 | 3.89             | FAKHQOQ  | 147.006 | 3.795            | PEFEX    | 146.76  | 4.078            |
| REGQUT   | 147.187 | 4.277            | ICOSIF   | 147.002 | 3.627            | VAZZII   | 146.755 | 4.109            |
| TARWUF   | 147.187 | 4.113            | BEMHEI   | 146.997 | 4.233            | NILRAF   | 146.749 | 4.354            |
| ACIKAA   | 146.743 | 4.319            | RIHDUJ   | 146.522 | 4.014            | WEXHUF   | 146.278 | 3.969            |
| HOKQED   | 146.738 | 4.333            | MULKOT   | 146.518 | 3.82             | NIPWIT   | 146.276 | 4.197            |
| GILFUF   | 146.718 | 3.384            | CEWCAJ   | 146.505 | 4.274            | BUNNOQ   | 146.268 | 4.169            |
| LAKPIY   | 146.718 | 3.887            | NHBZZN10 | 146.499 | 4.123            | NIPWIT01 | 146.268 | 4.129            |

| Refcodes | ∠YZnO   | d <sub>ZnO</sub> | Refcodes | ∠YZnO   | d <sub>ZnO</sub> | Refcodes | ∠YZnO   | d <sub>ZnO</sub> |
|----------|---------|------------------|----------|---------|------------------|----------|---------|------------------|
| XOZKAY   | 146.717 | 3.714            | QENZAK   | 146.493 | 4.164            | MUDKOM   | 146.261 | 4.13             |
| YEYFIT   | 146.716 | 4.301            | ETANOD   | 146.489 | 3.47             | DOSTUB   | 146.26  | 3.737            |
| FISDIY   | 146.715 | 3.648            | RERKUW   | 146.485 | 4.255            | KARXOR   | 146.257 | 4.397            |
| WEYMOE   | 146.708 | 4.399            | EHUXOX   | 146.478 | 4.24             | GIXDOH   | 146.252 | 3.883            |
| QORLEO   | 146.701 | 4.119            | PIBCAH   | 146.475 | 4.343            | FISDIY   | 146.252 | 3.727            |
| RERKUW   | 146.692 | 4.393            | RUWMUT   | 146.472 | 4.225            | CUJFOF   | 146.246 | 4.208            |
| GIZFAZ   | 146.692 | 4.362            | AWECUB01 | 146.469 | 3.74             | EBAWAH   | 146.244 | 3.706            |
| PAGSUP   | 146.689 | 2.717            | ZAQXEX   | 146.459 | 4.353            | WITCOR   | 146.22  | 3.912            |
| PAYCAX   | 146.676 | 3.996            | IPUKIQ   | 146.45  | 4.053            | EBAWAH   | 146.219 | 4.206            |
| SUWBOC   | 146.674 | 3.973            | MEJSIG   | 146.448 | 4.072            | GUPBOK   | 146.218 | 4.152            |
| FUBNOH   | 146.674 | 3.919            | MUHVIV   | 146.446 | 3.902            | SEBBAF   | 146.215 | 3.238            |
| SIJREJ   | 146.667 | 3.937            | NACZEW   | 146.443 | 4.38             | DOVHAX   | 146.212 | 4.206            |
| NAFYAX   | 146.655 | 4.23             | YUMJOI   | 146.438 | 4.32             | UJAPOL   | 146.205 | 4.286            |
| VIVXOO   | 146.654 | 4.224            | RUGXEZ   | 146.43  | 3.889            | DUPRAI   | 146.202 | 3.306            |
| DARNIV   | 146.653 | 4.116            | SASVIT   | 146.424 | 3.831            | WEZJAN   | 146.199 | 4.07             |
| GIKQEA   | 146.645 | 3.982            | YUXRIU   | 146.42  | 4.127            | OXUYIR   | 146.183 | 4.041            |
| JAJPIU   | 146.645 | 4.013            | BASFJ    | 146.417 | 4.267            | BEMZEC   | 146.164 | 4.039            |
| LAYLAB   | 146.637 | 4.391            | LETRIP   | 146.413 | 4.275            | KARDEO   | 146.157 | 4.361            |
| OBOHAS   | 146.633 | 3.964            | MAQLEY   | 146.407 | 4.286            | JISYIX   | 146.156 | 3.955            |
| MEGNUK   | 146.63  | 4.126            | WEXFIQ   | 146.401 | 3.716            | YUCBEE   | 146.15  | 4.016            |
| OXOXEG   | 146.626 | 3.768            | YUMJOI   | 146.397 | 4.331            | AWECUB   | 146.15  | 3.713            |
| LIDWAA   | 146.614 | 3.978            | OPIDAV   | 146.385 | 3.814            | NEPPAZ   | 146.137 | 4.201            |
| MUDFEW   | 146.609 | 4.016            | RAFQEV   | 146.383 | 4.253            | ROGMEG   | 146.136 | 3.143            |
| VEGLUQ   | 146.595 | 4.132            | SARXAO   | 146.373 | 4.329            | IZOWEA   | 146.125 | 3.617            |
| XAGQAZ01 | 146.594 | 4.061            | COTJUT   | 146.37  | 4.334            | QIPLAE   | 146.123 | 4.012            |
| RECKIX   | 146.588 | 4.328            | IFIZOM   | 146.37  | 3.791            | HOJJIC   | 146.123 | 4.378            |
| GUBFAK   | 146.586 | 3.987            | RERKUW   | 146.357 | 4.07             | SIZPOJ   | 146.122 | 4.402            |
| BOCRIX   | 146.583 | 3.873            | SOXQEE   | 146.355 | 2.948            | WULQAX   | 146.117 | 3.639            |
| QUMJOZ   | 146.58  | 4.064            | FAXCUF   | 146.352 | 4.157            | DASQAQ   | 146.113 | 3.804            |
| VUDMAK   | 146.576 | 4.344            | PIRFOL01 | 146.35  | 3.783            | MALFOU   | 146.098 | 4.069            |
| AZUCIH   | 146.567 | 3.794            | VEGMAX   | 146.349 | 4.156            | ONAVAB   | 146.079 | 4.291            |
| XAGQAZ   | 146.566 | 4.039            | AJIGEG   | 146.346 | 4.009            | SUVPEH   | 146.069 | 4.324            |
| UNOKIS   | 146.559 | 4.017            | YUTGIF   | 146.344 | 3.784            | FAXDAM   | 146.066 | 4.139            |
| XULFEQ   | 146.558 | 3.701            | PIRFOL   | 146.344 | 3.783            | HURFOR   | 146.066 | 4.224            |
| XUQH0H   | 146.555 | 4.201            | BUJBOA   | 146.339 | 4.231            | FAHMIM   | 146.061 | 3.698            |
| TITRIY   | 146.55  | 4.077            | SARCUN   | 146.333 | 4.215            | PENPAD01 | 146.059 | 4.288            |
| EMOQIH   | 146.55  | 3.952            | YUMJUO   | 146.315 | 4.33             | GUQTOB   | 146.056 | 4.11             |
| ZOGRNER  | 146.549 | 4.183            | MOKYAO   | 146.308 | 3.522            | PIBLAQ01 | 146.054 | 4.378            |
| FACLI02  | 146.542 | 3.877            | ZUFQIC   | 146.305 | 4.166            | HIYXIZ   | 146.045 | 4.227            |
| NENXIQ   | 146.537 | 3.669            | YUMJUO   | 146.295 | 4.32             | WAZVOM   | 146.045 | 3.468            |
| FACLII   | 146.532 | 3.868            | RICNAU   | 146.294 | 4.208            | XAFLOG   | 146.044 | 3.978            |
| ADEV0V   | 146.528 | 3.993            | CACBEQ   | 146.292 | 3.475            | HEFRES   | 146.043 | 3.974            |
| UGOQUE   | 146.523 | 3.901            | EYEDIY   | 146.279 | 4.279            | PIBLAQ   | 146.038 | 4.381            |
| UWADUT01 | 146.036 | 4.096            | NOBHIX   | 145.822 | 4.071            | YELHAB   | 145.576 | 4.149            |
| QANTIJ   | 146.024 | 3.982            | DAGXOZ   | 145.821 | 4.001            | WARCOJ   | 145.573 | 3.823            |
| ZEPP0C   | 146.012 | 4.338            | IHEMUF   | 145.816 | 3.631            | PUWKUP   | 145.566 | 4.076            |
| SUPLAR   | 146.011 | 3.753            | ZINWUO   | 145.8   | 4.292            | MAVMUU   | 145.566 | 4.073            |
| RUWMON   | 146.009 | 3.8              | ZINWUO10 | 145.8   | 4.292            | GUQLUA   | 145.557 | 4.254            |
| OZOQAX   | 146.001 | 4.285            | GICTAN   | 145.788 | 4.261            | HIXJUW   | 145.556 | 3.867            |
| YODDAZ   | 146     | 4.132            | CEPLUF   | 145.787 | 4.115            | UMAWOV   | 145.553 | 4.107            |
| NIQMEH   | 146     | 4.187            | EDUBEM01 | 145.787 | 4.222            | XOJWUP   | 145.55  | 4.134            |
| TUMQOJ   | 145.997 | 4.052            | QOMFEF   | 145.778 | 4.112            | OKUXUQ   | 145.544 | 4.019            |
| XOVXIQ   | 145.996 | 4.039            | NACZIE   | 145.775 | 3.399            | LARRUT01 | 145.541 | 3.822            |
| VUDMUE   | 145.991 | 4.36             | LIHXUX   | 145.774 | 3.855            | GUBVUW   | 145.535 | 4.092            |
| NOVWON   | 145.99  | 4.203            | RALZUD   | 145.768 | 3.639            | LAHRIX   | 145.532 | 3.64             |
| SIYFOX   | 145.987 | 4.187            | MAVNUU   | 145.766 | 3.68             | RIWZUW   | 145.529 | 4.155            |
| CEPBOR   | 145.981 | 3.824            | CESQUP   | 145.759 | 3.232            | LOGZAK   | 145.525 | 4.32             |
| HECWOD   | 145.98  | 4.254            | MEHZUU   | 145.757 | 3.934            | FULCOH   | 145.523 | 4.222            |
| KASQUS   | 145.977 | 3.816            | BEQPAQ   | 145.756 | 4.132            | ONAKUL   | 145.52  | 3.906            |

| Refcodes | $\angle YZnO$ | $d_{ZnO}$ | Refcodes | $\angle YZnO$ | $d_{ZnO}$ | Refcodes | $\angle YZnO$ | $d_{ZnO}$ |
|----------|---------------|-----------|----------|---------------|-----------|----------|---------------|-----------|
| XAFLOG   | 145.972       | 3.949     | FOTBUO   | 145.74        | 4.19      | ERIKOG   | 145.52        | 3.64      |
| YILXAT   | 145.962       | 4.164     | OKIJAW   | 145.738       | 3.933     | GUQLUA   | 145.515       | 4.283     |
| KENJUK   | 145.957       | 4.115     | DEJLIO   | 145.734       | 4.272     | HOTNIQ   | 145.504       | 3.408     |
| FOCNET   | 145.956       | 4.178     | DAWQOK   | 145.717       | 4.218     | OWUJEX   | 145.502       | 4.015     |
| YUVWOB   | 145.954       | 4.311     | JETFUN01 | 145.714       | 3.855     | OSAXIQ   | 145.499       | 3.31      |
| NAQLAT   | 145.953       | 4.244     | NIDMOD   | 145.711       | 4         | NOMQAJ01 | 145.496       | 3.921     |
| PETFON   | 145.951       | 4.327     | CUBYIJ   | 145.711       | 3.715     | FASWED01 | 145.496       | 4.254     |
| UYUBAS   | 145.937       | 4.046     | GIYHED   | 145.71        | 4.335     | MAPNAW   | 145.494       | 3.852     |
| HOWXOH   | 145.928       | 4.137     | XINTAS   | 145.7         | 4.135     | IBICOL   | 145.488       | 4.157     |
| GASRIE   | 145.926       | 4.29      | DEDYES   | 145.693       | 4.255     | QOVSAZ   | 145.479       | 4.317     |
| JELNUM   | 145.925       | 4.236     | TISBIG   | 145.69        | 3.928     | YUZQIV   | 145.479       | 4.401     |
| ULEXER   | 145.923       | 4.192     | GARWIH   | 145.69        | 4.118     | MIGXOS   | 145.479       | 3.847     |
| QAHVUS   | 145.921       | 3.998     | MAPNAW   | 145.683       | 3.824     | AGOKAK   | 145.479       | 4.291     |
| JUJQEK   | 145.909       | 4.006     | MEMPAV   | 145.677       | 4.036     | ZEFXUF   | 145.477       | 4.145     |
| NOPCUQ   | 145.906       | 3.76      | JEXQEJ   | 145.675       | 4.179     | DAWQIE   | 145.459       | 3.942     |
| LEKNUN   | 145.895       | 3.249     | COVQIQ   | 145.673       | 4.146     | ROBCEQ   | 145.458       | 3.919     |
| REYCIJ   | 145.881       | 4.2       | MUZVOS   | 145.658       | 4.32      | POLRIU   | 145.456       | 3.636     |
| EPEYAA   | 145.879       | 4.139     | EBITUG   | 145.648       | 4.363     | QUKRAS   | 145.446       | 4.272     |
| XIYGIV   | 145.879       | 4.282     | HEXGOI   | 145.638       | 3.876     | HUCHOD   | 145.445       | 4.286     |
| DUGYOU   | 145.876       | 4.02      | JAHZOI   | 145.638       | 4.382     | AGOKOY   | 145.444       | 4.249     |
| QEXVOH   | 145.874       | 4.092     | XUXQAJ   | 145.632       | 4.342     | WOPGUF   | 145.442       | 4.121     |
| PEJWUX   | 145.873       | 4.394     | KASQUS   | 145.63        | 3.821     | DONREE   | 145.437       | 3.772     |
| IJEDIL   | 145.87        | 4.031     | PEJWUX   | 145.628       | 4.057     | DAWQIE   | 145.435       | 4.188     |
| HINJUK   | 145.866       | 4.243     | NOMQAJ   | 145.61        | 3.947     | GIQZUF   | 145.423       | 3.873     |
| FURDEB   | 145.856       | 4.255     | ITAFEQ   | 145.605       | 4.209     | GIWHEA   | 145.423       | 3.787     |
| ICOLUK   | 145.849       | 4.339     | LERNAZ   | 145.605       | 4.013     | HUZZUY   | 145.419       | 4.27      |
| LALTAV   | 145.844       | 4.041     | XOZJOL   | 145.597       | 4.277     | FUZYEH   | 145.413       | 4.166     |
| LEKNUN   | 145.84        | 3.078     | MAGBIH   | 145.594       | 3.767     | EQOVIP   | 145.413       | 3.62      |
| NOVWON   | 145.839       | 4.135     | SOXTAC   | 145.581       | 4.045     | UJAPOL   | 145.408       | 3.838     |
| LIRNOR   | 145.837       | 3.892     | XECFUI   | 145.58        | 4.316     | OWUJEX   | 145.407       | 4.001     |
| KARDEO   | 145.832       | 4.031     | XOZJOL   | 145.579       | 3.672     | MAKCEI   | 145.406       | 3.889     |
| PENPAD   | 145.828       | 4.225     | WUJRUP   | 145.578       | 4.323     | EMEZAY   | 145.398       | 3.984     |
| XEGJIF   | 145.822       | 3.823     | DIWNOP   | 145.577       | 4.251     | HOJJOI   | 145.397       | 4.182     |
| KAQGIV   | 145.395       | 4.083     | QORFAE   | 145.198       | 4.073     | RUWMUT   | 144.998       | 4.398     |
| ROBQAB   | 145.387       | 4.396     | DUGYOU   | 145.195       | 4.26      | MUYCOB   | 144.996       | 3.001     |
| OXUROQ   | 145.386       | 3.956     | FEFVAO   | 145.187       | 4.363     | LOLFID   | 144.991       | 3.78      |
| AXOCEW   | 145.383       | 3.072     | SUPGAO01 | 145.186       | 4.01      | YUXQIT   | 144.989       | 3.922     |
| VIRLAK   | 145.381       | 4.053     | IHEMUF   | 145.174       | 4.344     | AJEDEZ   | 144.988       | 4.145     |
| OFUNOW   | 145.381       | 3.07      | JAMVOM   | 145.173       | 4.397     | FETPOM   | 144.986       | 4.022     |
| FONPAZ   | 145.376       | 3.954     | CUWMEN   | 145.166       | 4.244     | DUYJOY   | 144.983       | 4.011     |
| WIRHUD   | 145.373       | 4.182     | MUTVIH   | 145.162       | 4.279     | CAYGEP   | 144.98        | 4.27      |
| EDUBEM   | 145.372       | 4.226     | OPOYUO   | 145.157       | 4.38      | FEXPOP   | 144.98        | 4.237     |
| NENBUF   | 145.372       | 4.178     | SUWBOC   | 145.156       | 4.221     | LAWHAV   | 144.978       | 3.239     |
| JUCKIE   | 145.37        | 4.278     | ICUBUE   | 145.153       | 4.103     | UWADUT01 | 144.973       | 4.386     |
| LARRUTO2 | 145.357       | 3.835     | WUFBUV   | 145.15        | 4.167     | QELKEA   | 144.965       | 4.363     |
| UJAPOL   | 145.356       | 4.194     | BAVSOJ   | 145.144       | 4.027     | KOHBEP   | 144.965       | 4.233     |
| BEYLAW   | 145.354       | 3.843     | JEXQEJ   | 145.141       | 3.758     | LASMEZ   | 144.948       | 3.81      |
| HEHLOY   | 145.346       | 3.998     | CUWMEN01 | 145.14        | 4.164     | GUVFUY   | 144.946       | 3.889     |
| TOBRIO   | 145.343       | 4.111     | EMOQIH   | 145.138       | 4.073     | REPQEM   | 144.942       | 4.006     |
| FEBFAU   | 145.341       | 3.014     | ADIGUQ   | 145.131       | 4.06      | ITAFEQ01 | 144.94        | 4.221     |
| DAFYIW   | 145.341       | 3.794     | LASMEZ   | 145.128       | 3.84      | LUWTOM   | 144.938       | 3.996     |
| XUCHAF   | 145.332       | 3.947     | RAQBAO   | 145.118       | 4.159     | KAMTID   | 144.924       | 3.91      |
| BEQSUL   | 145.324       | 3.962     | KENJUK   | 145.112       | 4.169     | VEKGEA   | 144.922       | 4.104     |
| WAVDAY   | 145.322       | 4.141     | QETCAT   | 145.098       | 4.156     | ICUFOC   | 144.905       | 4.232     |
| EDONOE   | 145.313       | 4.22      | DIDTAP   | 145.094       | 3.233     | IDOVUV   | 144.901       | 4.011     |
| GAVNAV   | 145.313       | 4.336     | LOYMET   | 145.094       | 2.92      | JABGUR   | 144.901       | 4.304     |
| LARRUT   | 145.313       | 3.832     | SENFUP   | 145.091       | 4.3       | MOFWUA   | 144.898       | 4.049     |
| WIJDAV   | 145.308       | 3.802     | RECKIX   | 145.091       | 3.945     | ETANOD   | 144.896       | 4.293     |
| MARDAN   | 145.305       | 4.23      | UNOKIS   | 145.078       | 4.287     | VIBJEW   | 144.895       | 4.028     |

| Refcodes | ∠YZnO   | d <sub>ZnO</sub> | Refcodes | ∠YZnO   | d <sub>ZnO</sub> | Refcodes | ∠YZnO   | d <sub>ZnO</sub> |
|----------|---------|------------------|----------|---------|------------------|----------|---------|------------------|
| RISRER   | 145.299 | 4.275            | KARDEM   | 145.078 | 4.107            | OHANIW   | 144.895 | 4.155            |
| DAWQOK   | 145.299 | 3.84             | NUHHIK   | 145.077 | 4.146            | ALOKES   | 144.893 | 3.917            |
| RULDUX   | 145.298 | 4.193            | YUXQIT02 | 145.076 | 3.919            | DOBGUX   | 144.893 | 3.965            |
| SUVPEH   | 145.286 | 3.982            | WACRUR   | 145.074 | 3.943            | UZIDAJ   | 144.89  | 4.195            |
| EMATAQ   | 145.285 | 3.979            | CAQHAF   | 145.061 | 4.15             | NAZZOG   | 144.89  | 4.126            |
| LESGIC   | 145.28  | 3.932            | PAFWEY   | 145.059 | 4.196            | DASQAQ   | 144.882 | 3.681            |
| DEHFUR01 | 145.278 | 4.15             | PAFWEY10 | 145.059 | 4.196            | COFCIL   | 144.866 | 3.779            |
| ZIHQIU   | 145.263 | 4.025            | UBOWIT   | 145.054 | 3.652            | KATQIF   | 144.864 | 3.977            |
| DUWFOS   | 145.258 | 4.277            | VONCOR   | 145.049 | 4.156            | KEMKET   | 144.858 | 4.37             |
| NEPPAZ   | 145.256 | 3.976            | IMUZIZ   | 145.047 | 4.158            | LMETZN01 | 144.855 | 4.153            |
| AGOJOX   | 145.255 | 4.229            | YESFOS   | 145.042 | 3.805            | GLYZNS10 | 144.852 | 4.115            |
| HIYNIN   | 145.242 | 3.479            | XEHFIC   | 145.03  | 4.034            | BINBAE   | 144.85  | 4.312            |
| UYIBUB02 | 145.238 | 4.014            | QARVIP   | 145.025 | 3.752            | PUJVEY   | 144.849 | 3.965            |
| CAYWEG   | 145.234 | 4.057            | PITNAJ   | 145.022 | 4.375            | SIQFAA   | 144.845 | 4.061            |
| ZEJSUF   | 145.231 | 3.763            | ONAVAB   | 145.022 | 4.072            | VOCNAE   | 144.838 | 4.061            |
| CESQUP   | 145.226 | 3.073            | QASZOC   | 145.017 | 3.863            | PIJKAV   | 144.836 | 3.788            |
| FAXDAM   | 145.225 | 4.186            | FETXAG   | 145.012 | 3.956            | AFIQUB   | 144.836 | 3.909            |
| RIWGIO   | 145.221 | 3.94             | RACYAW   | 145.008 | 3.988            | TOBPOS   | 144.834 | 4.119            |
| NAZZOG01 | 145.221 | 4.16             | MILRUJ   | 145.006 | 3.897            | YUXROA01 | 144.83  | 4.055            |
| MORLIR   | 145.21  | 3.165            | DEBSUZ   | 145.004 | 3.918            | HITVOZ   | 144.818 | 4.403            |
| MARDAN   | 145.205 | 4.046            | SUPGAO   | 145.003 | 3.99             | MAJZAB   | 144.807 | 4.37             |
| RIDWUX   | 145.203 | 4.212            | ZEFWOY   | 145.003 | 4.242            | NESQOT   | 144.803 | 4.273            |
| SUWZOC   | 145.201 | 4.298            | GASREA   | 145.001 | 4.308            | MIQYER   | 144.801 | 4.328            |
| YUXQIT01 | 144.797 | 3.92             | ULEPOS   | 144.595 | 3.074            | ZNGLUD01 | 144.406 | 4                |
| XUTCOC   | 144.796 | 3.736            | XAGQAZ01 | 144.582 | 3.805            | NOVQOH   | 144.392 | 4.227            |
| PAGSUP   | 144.793 | 3.707            | OFOPUV   | 144.577 | 3.746            | SOWCOY   | 144.383 | 3.263            |
| PEBNIV   | 144.777 | 4.073            | NEKXOU   | 144.576 | 3.871            | SIYGAK   | 144.382 | 3.532            |
| IJUXUG01 | 144.773 | 4.236            | NADCUS   | 144.575 | 3.936            | WIJDAV   | 144.38  | 4.212            |
| MORLIR   | 144.772 | 3.234            | BICJEG   | 144.575 | 4.301            | EXIFUN   | 144.38  | 4.41             |
| LASMEZ   | 144.772 | 4.103            | GOCMIW   | 144.569 | 4.331            | MAPMOJ   | 144.379 | 3.842            |
| UGUKUD   | 144.771 | 3.296            | CUBWIG   | 144.569 | 3.388            | ALOPAS01 | 144.377 | 3.907            |
| RUWMED   | 144.764 | 3.885            | KUBNIG   | 144.568 | 4.108            | XEKYOE   | 144.371 | 3.345            |
| WIJDAV   | 144.762 | 4.402            | DOVHAX   | 144.564 | 4.159            | EYAYAG   | 144.366 | 3.806            |
| VUTDAR   | 144.762 | 4.324            | LOLRUC   | 144.562 | 3.894            | MAPMOJ   | 144.363 | 3.843            |
| IJUXUG   | 144.761 | 4.251            | AHONIW   | 144.559 | 3.85             | SIYFOX   | 144.361 | 3.508            |
| PEPHID   | 144.76  | 3.917            | WIRHUD   | 144.558 | 4.299            | YEJNAF   | 144.355 | 4.262            |
| DAGXOZ   | 144.759 | 4.226            | REJXOX   | 144.551 | 3.967            | GERPID01 | 144.353 | 4.071            |
| GUCQIH   | 144.756 | 3.884            | LUGREK   | 144.547 | 4.408            | GERPID02 | 144.352 | 4.05             |
| ESADUY   | 144.753 | 2.646            | GERPID03 | 144.546 | 4.036            | SICDIT   | 144.352 | 4.191            |
| ZIHQIU   | 144.75  | 4.219            | GUGXUE   | 144.544 | 4.04             | VONCOR   | 144.349 | 4.246            |
| BAVVUS   | 144.744 | 4.222            | AQIFOW   | 144.542 | 4.341            | GUQLUA   | 144.335 | 4.19             |
| FUPQOW   | 144.744 | 3.72             | SIYGEO   | 144.541 | 4.205            | VOCNAE   | 144.323 | 3.168            |
| OWUHOF   | 144.744 | 3.96             | ZNGLUD   | 144.54  | 4.048            | WULQAX   | 144.319 | 3.966            |
| RUWMED   | 144.74  | 4.387            | QOFKIF   | 144.539 | 4.044            | XANCEV   | 144.315 | 4.315            |
| QOMFEF   | 144.737 | 3.951            | IGUDEV   | 144.528 | 4.386            | ALOPAS02 | 144.314 | 3.906            |
| NOMQAJ01 | 144.737 | 3.882            | CUVJEL   | 144.526 | 4.007            | QIBNOE   | 144.31  | 4.182            |
| GUGXOY   | 144.727 | 4.024            | EPEYII   | 144.518 | 4.329            | UDIRUW   | 144.307 | 4.248            |
| NOMQAJ01 | 144.723 | 2.955            | UGEZEN   | 144.517 | 4.325            | OWUJEX   | 144.305 | 3.948            |
| OGUHAA   | 144.721 | 4.021            | LAYLAB   | 144.515 | 4.203            | LEHNAR   | 144.305 | 3.93             |
| KUBTEH   | 144.713 | 4.008            | YUXWEV   | 144.509 | 4.309            | QIFKOJ   | 144.304 | 3.769            |
| YIHLOS   | 144.713 | 4.143            | DIFVIB   | 144.509 | 4.235            | AFUJAM   | 144.288 | 4.334            |
| OHICUG   | 144.71  | 4.339            | YUXROA   | 144.507 | 4.047            | NOHFAU   | 144.283 | 3.748            |
| RUZSUA   | 144.707 | 4.135            | IVEQAB   | 144.496 | 2.966            | WIRHUD   | 144.281 | 3.888            |
| UMIJAD   | 144.706 | 4.299            | NUWWAE   | 144.493 | 4.347            | HIJSUO   | 144.279 | 4.144            |
| GERPID   | 144.706 | 4.071            | BAFTAF   | 144.491 | 3.996            | CIMJOA   | 144.277 | 4.033            |
| CISMAU   | 144.699 | 3.9              | QIBNOE01 | 144.49  | 4.186            | XOJWUP   | 144.276 | 4.233            |
| GASSAX   | 144.692 | 4.318            | ZIDBUN   | 144.487 | 3.634            | NUJVAS   | 144.268 | 4.035            |
| NUCDIZ   | 144.689 | 4.19             | MOHLEB   | 144.485 | 4.148            | REHGAN01 | 144.266 | 4.124            |
| LELSOO   | 144.688 | 3.849            | HAYDOC   | 144.466 | 4.091            | ZUSJII   | 144.265 | 4.274            |

| Refcodes | ∠YZnO   | d <sub>ZnO</sub> | Refcodes | ∠YZnO   | d <sub>ZnO</sub> | Refcodes | ∠YZnO   | d <sub>ZnO</sub> |
|----------|---------|------------------|----------|---------|------------------|----------|---------|------------------|
| MAPMUP   | 144.687 | 3.856            | XAGQAZ   | 144.454 | 4.186            | VOQDEL01 | 144.255 | 3.99             |
| PENPAB   | 144.665 | 4.054            | FIPRUR   | 144.452 | 3.713            | FONPAZ   | 144.241 | 3.86             |
| PIWZOO   | 144.658 | 4.345            | IBESAN   | 144.449 | 4.296            | CAYWEG   | 144.24  | 4.223            |
| NAZZOG01 | 144.643 | 4.135            | OQEYUG   | 144.445 | 4.237            | VEGSAF   | 144.239 | 3.802            |
| MEYPIT   | 144.642 | 4.09             | RUWMUT   | 144.445 | 4.278            | XOZKAY   | 144.238 | 4.228            |
| AMERIT   | 144.632 | 4.307            | PUWKUP   | 144.435 | 4.353            | NEXKUX   | 144.236 | 3.871            |
| SOMKUC   | 144.63  | 4.078            | ICUGET   | 144.432 | 4.261            | UDITEJ   | 144.231 | 4.381            |
| SUPLAR   | 144.629 | 3.857            | SOTJAN   | 144.426 | 4.362            | NOMQAJ   | 144.225 | 2.979            |
| ZNGLUD02 | 144.628 | 4.046            | DEYVUA   | 144.425 | 3.142            | QEMDOB   | 144.214 | 3.649            |
| QIBNOE02 | 144.622 | 4.186            | RAGVIH   | 144.422 | 3.768            | MILRUY   | 144.207 | 3.87             |
| OTIVUJ   | 144.6   | 4.037            | IXOQOE   | 144.42  | 4.15             | ALOPAS   | 144.206 | 3.913            |
| LUWSIF   | 144.597 | 3.879            | QOJYIZ   | 144.412 | 4.255            | TAYBII   | 144.201 | 4.199            |
| NAZZOG   | 144.597 | 4.108            | COLBUB   | 144.411 | 4.214            | BAFTAF   | 144.198 | 3.922            |
| XOYDEX   | 144.197 | 3.242            | JAPIU    | 143.991 | 3.86             | EBIKAB   | 143.801 | 4.355            |
| REHGAN   | 144.178 | 4.124            | AXOSOY   | 143.983 | 3.899            | MAQLEY   | 143.801 | 4.299            |
| BIZFUL   | 144.172 | 4.1              | GABVUD   | 143.977 | 4.28             | JETGEY   | 143.792 | 3.895            |
| MULKUZ   | 144.17  | 4.113            | RERKUW   | 143.975 | 4.134            | FASMOF   | 143.79  | 4.103            |
| QOCVIN   | 144.17  | 4.236            | REGROO   | 143.971 | 3.276            | ZNGLUD02 | 143.763 | 4.115            |
| XUGBOR   | 144.168 | 4.156            | OZUNEF   | 143.97  | 4.247            | MIQSIR   | 143.75  | 4.373            |
| TIVJIT   | 144.164 | 4.266            | GEYRIO   | 143.969 | 3.935            | CEZWAG   | 143.742 | 4.328            |
| CUWNOA   | 144.161 | 3.47             | SUVPEH   | 143.968 | 4.139            | NACZIE   | 143.741 | 3.869            |
| DARNUH   | 144.16  | 4.39             | XAGQAZ   | 143.965 | 3.785            | GIXDOH   | 143.735 | 4.309            |
| KEDRAO   | 144.153 | 4.141            | MAPNEA   | 143.964 | 3.855            | GIQNUT   | 143.73  | 4.405            |
| MOCTEF   | 144.147 | 4.118            | QARVIP   | 143.963 | 4.075            | LEPPUU   | 143.728 | 4.045            |
| VIXTOM   | 144.144 | 4.204            | WIWDUD   | 143.961 | 3.779            | FUPQOW   | 143.71  | 4.199            |
| ZEFXUF   | 144.143 | 4.228            | MEWPIQ   | 143.96  | 3.163            | UFAGAK   | 143.707 | 3.96             |
| DENHUA   | 144.142 | 3.852            | HAZYUE   | 143.958 | 4.165            | MALFOU   | 143.699 | 3.981            |
| AQEQUI   | 144.138 | 3.931            | LAGROC   | 143.955 | 4.167            | SOMNOA   | 143.696 | 3.245            |
| GLYZNS10 | 144.137 | 4.187            | ICUBUE   | 143.951 | 3.339            | EKOZUA   | 143.692 | 4.039            |
| DUQZOH   | 144.132 | 4.209            | VAJHIA   | 143.946 | 4.367            | ROGMEG   | 143.684 | 3.238            |
| XAGQAZ01 | 144.129 | 4.202            | CIVBAL   | 143.943 | 4.001            | XILGUU   | 143.677 | 4.189            |
| DARPAP   | 144.127 | 4.383            | CAQHAF   | 143.942 | 4.113            | OWUJIB   | 143.67  | 3.929            |
| LODNOK   | 144.126 | 4.368            | CIVBAL   | 143.928 | 4.121            | FOTBUO   | 143.661 | 4.155            |
| WEBRAZ   | 144.122 | 4.361            | MEWPIQ   | 143.918 | 3.316            | ROBCEQ   | 143.661 | 3.443            |
| NAMCUA   | 144.122 | 4.005            | YEQRES   | 143.917 | 4.121            | QOMFEF   | 143.653 | 3.843            |
| MUDFEW   | 144.114 | 4.212            | GIDCUT   | 143.911 | 4.134            | YIHKUZ   | 143.648 | 3.967            |
| EXOFAZ   | 144.099 | 3.994            | GUPBOK   | 143.909 | 4.33             | PETFON   | 143.646 | 4.197            |
| LUKDOK   | 144.09  | 3.806            | IPIKIQ   | 143.897 | 3.849            | MUZVUY   | 143.633 | 4.145            |
| MAGBIH   | 144.086 | 3.886            | ROQKIT   | 143.896 | 4.03             | YUXQIT   | 143.63  | 3.917            |
| DEBSUZ   | 144.085 | 4.152            | YIRPUO   | 143.894 | 4.12             | POMNAI   | 143.621 | 4.143            |
| LIJQOM   | 144.084 | 4.211            | EBAWAH   | 143.88  | 4.399            | TISPER   | 143.62  | 4.408            |
| SIZRIC   | 144.081 | 4.388            | BOVLAA   | 143.877 | 4.125            | POMNAI01 | 143.618 | 4.143            |
| AFUWEG   | 144.075 | 3.823            | LITHUU   | 143.875 | 3.994            | OYAPUB   | 143.618 | 4.019            |
| AHOMOB01 | 144.07  | 3.898            | WARCOJ   | 143.87  | 4.162            | TISBIG   | 143.617 | 4.303            |
| RUWMUT   | 144.068 | 4.073            | FEQVEE   | 143.865 | 4.037            | MIGXIM   | 143.612 | 3.832            |
| XEMPEN   | 144.064 | 4.086            | WIJDAV   | 143.851 | 3.97             | RUPZEK   | 143.602 | 4.339            |
| COKCEN   | 144.057 | 3.502            | JISYIX   | 143.849 | 3.806            | WIGTEP   | 143.601 | 4.396            |
| MAPNEA   | 144.05  | 3.847            | FUBNOH   | 143.849 | 2.944            | LEPPUU   | 143.599 | 3.56             |
| WIJDAV   | 144.043 | 3.937            | RAMROP   | 143.848 | 4.251            | NOMQAJ01 | 143.599 | 2.959            |
| GEHYEB   | 144.033 | 3.757            | EMOTOQ   | 143.835 | 4.351            | SUVPEH   | 143.598 | 4.174            |
| TITRIY   | 144.032 | 3.805            | ESASUN   | 143.834 | 4.21             | LEQWIP   | 143.592 | 3.038            |
| ASUWUI   | 144.03  | 4.124            | OGUHAA   | 143.834 | 3.896            | COKCEN   | 143.592 | 4.104            |
| CEFLEH   | 144.026 | 4.235            | NOBYIO   | 143.83  | 4.097            | IFABIA01 | 143.59  | 3.05             |
| KEYXAO   | 144.025 | 4.303            | RASGOK   | 143.827 | 4.277            | JAPIU    | 143.58  | 3.948            |
| BEGZOE   | 144.022 | 4.236            | RASGAW   | 143.825 | 4.272            | RAXNAH   | 143.573 | 4.017            |
| YIRPUO02 | 144.021 | 4.129            | LIWXEV   | 143.819 | 3.884            | ROBCEQ   | 143.563 | 3.48             |
| YIRPUO01 | 144.019 | 4.128            | LACQIS   | 143.815 | 4.131            | RASGEA   | 143.559 | 4.289            |
| OHALAL   | 144.017 | 4.038            | TICDAM   | 143.815 | 3.873            | GOJHUJ   | 143.557 | 4.193            |
| AVIMOI   | 144.015 | 4.053            | WALBOC   | 143.811 | 4.026            | ZIJZEZ   | 143.553 | 4.064            |

| Refcodes | ∠YZnO   | d <sub>ZnO</sub> | Refcodes | ∠YZnO   | d <sub>ZnO</sub> | Refcodes | ∠YZnO   | d <sub>ZnO</sub> |
|----------|---------|------------------|----------|---------|------------------|----------|---------|------------------|
| FAKTIY   | 144.009 | 4.156            | VIRLAK   | 143.81  | 4.342            | CITTUW   | 143.551 | 2.991            |
| POLDOL   | 144.002 | 4.059            | OBUNEI   | 143.809 | 4.262            | DEYVUA   | 143.548 | 3.246            |
| HUZDUD   | 144     | 4.082            | GAYZIP01 | 143.806 | 4.242            | TOJBIF   | 143.547 | 3.811            |
| MEWWET   | 143.53  | 3.544            | MIMRAB   | 143.242 | 3.025            | NAKPUM   | 142.963 | 4.262            |
| IFABIA03 | 143.519 | 3.049            | VIBJEW   | 143.241 | 3.974            | NEKXOU   | 142.953 | 3.737            |
| BOYFOM   | 143.511 | 3.952            | RULXEC   | 143.23  | 4.038            | UJEJUO   | 142.95  | 4.172            |
| HOJJIC   | 143.499 | 4.077            | PUFYAR   | 143.219 | 3.805            | UWADUT01 | 142.948 | 3.999            |
| DEHFON   | 143.494 | 4.365            | HOMGEX   | 143.217 | 4.183            | PAHPIB   | 142.945 | 4.121            |
| TEBMIA   | 143.488 | 4.237            | FIPRUR   | 143.21  | 4.387            | HIYNIN   | 142.945 | 4.016            |
| BEPNER   | 143.481 | 4.237            | DISWOU   | 143.203 | 4.093            | UMAWOV   | 142.945 | 3.97             |
| LASMEZ   | 143.468 | 3.751            | UKEHOJ   | 143.197 | 4.141            | NUDNIL   | 142.942 | 3.506            |
| MIMRAB02 | 143.465 | 3.038            | WEXCIN   | 143.189 | 4.136            | NUJVAS   | 142.937 | 3.455            |
| ULEXER   | 143.457 | 4.039            | MIVDIF   | 143.187 | 4.102            | FUDGIW   | 142.932 | 4.309            |
| UFARAX   | 143.452 | 4.124            | RUZQAE   | 143.174 | 3.982            | GAYZIP   | 142.928 | 4.206            |
| MALFOU   | 143.437 | 4.366            | MAKYUS   | 143.172 | 3.851            | LAXSAH   | 142.918 | 3.977            |
| OPICIC   | 143.434 | 3.801            | DIHNEO   | 143.168 | 4.217            | ZIHQIU   | 142.902 | 4.138            |
| VIQZAX   | 143.424 | 4.161            | WENDIE   | 143.166 | 3.32             | NOHDOG   | 142.899 | 4.011            |
| XULFEQ   | 143.42  | 4.205            | CAVXOP   | 143.156 | 4.256            | MIVDIF   | 142.89  | 3.877            |
| GARMAR   | 143.418 | 3.945            | GUPBOK   | 143.156 | 4.243            | FODMUJ   | 142.886 | 3.716            |
| FUMYUI   | 143.416 | 4.21             | TIKXET   | 143.155 | 4.271            | YOYTUE   | 142.879 | 4.402            |
| YUXQIT01 | 143.413 | 3.92             | HECYOF   | 143.149 | 4.239            | AFEGAV01 | 142.869 | 4.184            |
| HIQMUR   | 143.41  | 4.398            | HIYNIN   | 143.145 | 3.509            | WOPNUM   | 142.867 | 4.239            |
| TUFJAG   | 143.404 | 4.103            | FAHMIM   | 143.13  | 3.747            | BEMHAG   | 142.865 | 4.2              |
| GASSUR   | 143.4   | 3.184            | TOTNAU   | 143.128 | 4.035            | SIYGAK   | 142.863 | 4.113            |
| GOTLIM   | 143.396 | 4.086            | AQEYOK   | 143.123 | 3.887            | NEPPAZ   | 142.852 | 4.311            |
| POTWAZ   | 143.393 | 4.037            | OJUHOQ   | 143.121 | 4.053            | LILVAD   | 142.848 | 4.017            |
| QANZEL   | 143.385 | 4.142            | WUYHUU   | 143.12  | 4.081            | NIPWIT01 | 142.847 | 3.839            |
| GUJFIB   | 143.383 | 3.084            | KAKFEL   | 143.12  | 3.748            | RUWMED   | 142.841 | 4.408            |
| RASFUP   | 143.377 | 4.298            | WIZLUM   | 143.116 | 4.208            | VEGSAF   | 142.839 | 3.844            |
| NELTII   | 143.376 | 4.14             | NUHHON   | 143.108 | 4.171            | HAGMAG   | 142.828 | 3.5              |
| RUZSUA   | 143.364 | 4.185            | OGUHAA   | 143.107 | 3.93             | NACZIE   | 142.825 | 4.125            |
| WARCAV   | 143.36  | 3.916            | TATLUZ   | 143.09  | 4.396            | LOYMET   | 142.821 | 3.822            |
| RERKUW   | 143.359 | 4.096            | TEBDOT   | 143.089 | 3.716            | WALBOC01 | 142.81  | 4.055            |
| DAXXAE   | 143.358 | 4.316            | GASSUR   | 143.083 | 3.309            | LUQKOA   | 142.809 | 3.805            |
| YUXQIT02 | 143.349 | 3.923            | UZANEP   | 143.082 | 3.744            | GILFUF   | 142.807 | 3.295            |
| FEDYAQ   | 143.346 | 4.219            | NIPWIT   | 143.077 | 3.879            | KEDQOB   | 142.805 | 3.794            |
| IQOJAB   | 143.337 | 4.149            | BECSEK   | 143.073 | 3.682            | XEKYOE   | 142.8   | 3.329            |
| NERQAC   | 143.329 | 4.341            | LEHMUK   | 143.058 | 3.899            | SASGEY   | 142.795 | 3.527            |
| DOGMIW   | 143.323 | 4.121            | SUYBIA   | 143.045 | 3.97             | ITUBOP   | 142.795 | 4.366            |
| CUBWIG   | 143.313 | 4.375            | COTJUT   | 143.044 | 4.382            | KEHNIW   | 142.794 | 3.776            |
| AYUZUP   | 143.29  | 4.22             | YESFOS   | 143.038 | 3.261            | NUCDIZ   | 142.784 | 3.959            |
| POWDOV   | 143.283 | 3.998            | FOTBUO   | 143.037 | 4.364            | ADOKEN   | 142.783 | 3.898            |
| GOWHEI   | 143.275 | 3.88             | MIVDIF   | 143.018 | 4.08             | QOJYIZ   | 142.779 | 4.147            |
| DEHFUR   | 143.274 | 4.175            | PERBOF   | 143.007 | 4.348            | EBALAY   | 142.771 | 4.168            |
| NOHDOG   | 143.268 | 3.861            | LUWTEC   | 142.996 | 3.987            | ISODUP   | 142.765 | 4.24             |
| BINBAE   | 143.267 | 4.227            | TIMQEM   | 142.995 | 4.321            | MIBSUM   | 142.765 | 4.028            |
| ZIWLAS   | 143.263 | 4.163            | ZAQXEX   | 142.981 | 4.08             | OPOLUC   | 142.763 | 3.717            |
| RIDWUX   | 143.262 | 3.944            | OJUHOQ01 | 142.978 | 4.09             | TISBIG   | 142.759 | 3.955            |
| OGIHIY   | 143.257 | 4.232            | AZAQOJ   | 142.972 | 3.88             | QASPAE   | 142.755 | 4.044            |
| EBIROY   | 143.257 | 3.895            | KAQGIV   | 142.965 | 4.294            | TIVJIT   | 142.75  | 4.12             |
| RORSEY   | 143.25  | 3.861            | SOQDAE   | 142.965 | 4.185            | CILDOR01 | 142.748 | 3.89             |
| HAJLOV   | 143.249 | 4.148            | BASZUU   | 142.963 | 4.206            | OPOZAV   | 142.746 | 3.177            |
| XEKYOE   | 142.742 | 3.293            | REXPES   | 142.509 | 4.207            | ALOKES   | 142.324 | 3.778            |
| OXPAZN   | 142.737 | 4.159            | DUVPER   | 142.508 | 3.732            | AFEGAV   | 142.314 | 4.236            |
| VUJTIE   | 142.727 | 4.024            | VUPQON   | 142.508 | 4.371            | YIHKUZ   | 142.311 | 4.009            |
| CAPXEY   | 142.712 | 4.252            | DURMAF   | 142.506 | 4.016            | ACEPIL   | 142.31  | 3.196            |
| BUZVOI   | 142.709 | 4.043            | XARFOP   | 142.506 | 3.968            | NAZZOG   | 142.306 | 3.685            |
| SUYBEW   | 142.702 | 4.048            | CUBYIJ   | 142.503 | 4.387            | CITTUW   | 142.306 | 4.15             |
| TAHNIB   | 142.701 | 3.808            | FAMBIG   | 142.502 | 4.324            | ROVFEP   | 142.304 | 3.995            |

| Refcodes | $\angle YZnO$ | $d_{ZnO}$ | Refcodes | $\angle YZnO$ | $d_{ZnO}$ | Refcodes | $\angle YZnO$ | $d_{ZnO}$ |
|----------|---------------|-----------|----------|---------------|-----------|----------|---------------|-----------|
| OTOZOO   | 142.701       | 3.214     | JEXQEJ   | 142.498       | 4.241     | SOQDAE   | 142.297       | 4.01      |
| LAPTIJ   | 142.696       | 4.178     | TEDYAE   | 142.496       | 4.208     | UZANAL   | 142.296       | 3.726     |
| YEBBAS   | 142.689       | 4.022     | CEZVIO   | 142.486       | 4.233     | KUBNAX   | 142.289       | 4.24      |
| TENLUX   | 142.688       | 3.292     | CEPLUF   | 142.483       | 4.032     | POQSOD   | 142.285       | 4.006     |
| WUVZIZ   | 142.675       | 4.04      | RIWWOK   | 142.483       | 3.066     | ASUXIX   | 142.284       | 4.141     |
| XUSGUN01 | 142.672       | 4.297     | EBALAY   | 142.478       | 4.163     | ROVFEP   | 142.273       | 3.998     |
| ICUFES   | 142.669       | 4.161     | ZIWLAS   | 142.468       | 4.025     | TOFSOW   | 142.272       | 4.012     |
| OGIMOG   | 142.666       | 4.15      | PUKTUM   | 142.466       | 3.58      | LUMCED   | 142.271       | 4.285     |
| OWUJIB   | 142.666       | 4.053     | MULKOT   | 142.466       | 3.764     | JUZSEE   | 142.269       | 4.187     |
| RIHJOJ   | 142.663       | 4.308     | VOZCIY   | 142.459       | 4.192     | IXOQOE   | 142.255       | 4.208     |
| BIZFUL   | 142.656       | 4.085     | FAMFAC   | 142.457       | 4.378     | AZAQOJ   | 142.255       | 3.918     |
| OFOPUV   | 142.65        | 3.679     | RUPSUS   | 142.455       | 4.393     | NEMVAD   | 142.254       | 4.226     |
| CILDOR   | 142.644       | 3.891     | NOVQOH   | 142.452       | 4.328     | LIDWAA   | 142.254       | 3.662     |
| PICBAE   | 142.64        | 4.368     | AQIFOW   | 142.452       | 4.08      | FAXCUF   | 142.253       | 4.073     |
| XUQHOOH  | 142.635       | 4.349     | TEDXUX   | 142.446       | 4.179     | MARDAN   | 142.25        | 4.153     |
| UZAMUE   | 142.623       | 3.732     | YEYVEH   | 142.445       | 4.188     | GUBQOM   | 142.241       | 4.303     |
| AJIGEG   | 142.623       | 3.819     | SIYGEO   | 142.427       | 4.205     | ROVFEP   | 142.24        | 3.978     |
| HECWOD   | 142.619       | 4.31      | LOHRAE   | 142.422       | 4.088     | XELNOS   | 142.229       | 3.971     |
| KEBGIK   | 142.618       | 4.242     | XIXPEA   | 142.415       | 3.895     | QANCAJ   | 142.227       | 4.405     |
| MEYPIT   | 142.617       | 4.25      | WECKOH   | 142.412       | 4.253     | UKEHOJ   | 142.221       | 4.388     |
| SIVXAY   | 142.613       | 2.8       | QAVBIA   | 142.406       | 4.098     | AFIQUB   | 142.212       | 3.679     |
| LIDWAA   | 142.602       | 4.169     | ROVFEP   | 142.39        | 3.979     | SIYFOX   | 142.205       | 4.104     |
| TARYET   | 142.601       | 4.085     | ABUQEW   | 142.39        | 4.016     | DISWOU   | 142.203       | 3.839     |
| MOKZUJ   | 142.596       | 3.953     | ROVFEP   | 142.383       | 3.984     | QEKAC    | 142.192       | 3.91      |
| SUZGOM   | 142.595       | 4.315     | HAZYUE   | 142.382       | 3.553     | PATZUF   | 142.18        | 4.337     |
| HYZCZN   | 142.594       | 3.826     | VAJSUW   | 142.382       | 3.883     | KEQJEX   | 142.175       | 4.301     |
| HISWAK   | 142.593       | 3.755     | SADFAH   | 142.381       | 4.09      | TEFQOL   | 142.174       | 4.124     |
| MOJTAH   | 142.589       | 4.199     | RUCMAE   | 142.381       | 4.052     | XELNOS01 | 142.17        | 3.967     |
| QICTEC   | 142.589       | 3.949     | ROVFEP   | 142.38        | 3.977     | WUDBOO   | 142.166       | 4.232     |
| LEJYAE   | 142.588       | 4.149     | UFARAX   | 142.378       | 3.087     | NEMTUV   | 142.163       | 4.386     |
| OMEBIS   | 142.584       | 3.979     | QASPAE   | 142.376       | 3.867     | ROVFEP   | 142.146       | 3.984     |
| LOZQEY   | 142.565       | 3.648     | LAKPIY   | 142.372       | 3.94      | QARCUJ   | 142.14        | 3.974     |
| VIZPAY   | 142.564       | 4.256     | DEFHUT   | 142.371       | 4.088     | HIZXEU   | 142.135       | 4.004     |
| BAQHEG   | 142.556       | 4.354     | HAJBAW   | 142.364       | 3.031     | LILVAD   | 142.129       | 3.922     |
| HOMGEX   | 142.551       | 4.091     | GUCXEI   | 142.361       | 4.213     | GEVFAR   | 142.129       | 4.075     |
| ROVFEP   | 142.546       | 3.989     | HEHVOI   | 142.353       | 4.29      | WECKOH   | 142.116       | 4.285     |
| LIDWAA   | 142.546       | 3.941     | PUWKUP   | 142.342       | 4.349     | PUWKUP   | 142.112       | 4.388     |
| AFOHIN   | 142.535       | 3.989     | JEVCAP   | 142.335       | 4.325     | COQGAS   | 142.111       | 3.476     |
| YELFED   | 142.534       | 4.38      | JIPVUD   | 142.333       | 3.256     | LABQIQ   | 142.108       | 3.612     |
| AJUQIH   | 142.529       | 3.735     | PACWIA   | 142.329       | 4.363     | UTUBAP   | 142.108       | 3.224     |
| AQEQUI   | 142.523       | 3.862     | GOTLIM   | 142.327       | 4.298     | OSAXIQ   | 142.103       | 3.881     |
| VIGFAW   | 142.509       | 3.993     | LUMCIH   | 142.326       | 4.292     | PUPXEE   | 142.091       | 4.212     |
| YEYVEH   | 142.086       | 4.167     | AGEXAP   | 141.866       | 4.193     | XELNOS   | 141.606       | 4.181     |
| QOMFEF   | 142.071       | 4.162     | WENPIO   | 141.866       | 3.27      | CEXSOO   | 141.594       | 3.984     |
| RAXNAH   | 142.066       | 3.659     | YOCKUW   | 141.855       | 3.135     | NABMAF   | 141.588       | 3.835     |
| VAXBAY   | 142.063       | 3.554     | AFUWEG   | 141.853       | 4.19      | YEYFIT   | 141.585       | 4.291     |
| SIYGEO   | 142.062       | 3.52      | GUGYEP   | 141.849       | 3.915     | NAKPUM   | 141.584       | 3.654     |
| WUMXIM   | 142.062       | 4.045     | OBOHAS   | 141.848       | 4.036     | UMIJAD   | 141.581       | 4.38      |
| WUJRUP   | 142.061       | 4.272     | XELNOS01 | 141.847       | 4.177     | FAHMIM   | 141.579       | 3.856     |
| XELNOS02 | 142.055       | 3.961     | MAXGOL   | 141.843       | 3.909     | KIWZOJ   | 141.577       | 4.226     |
| LOCVIL   | 142.055       | 3.956     | ORETAH   | 141.835       | 4.068     | GABWEN   | 141.576       | 3.911     |
| RIWWOK   | 142.052       | 4.181     | MUSMAQ   | 141.829       | 3.841     | QIBNOE   | 141.572       | 3.997     |
| PIFFEQ   | 142.05        | 3.981     | JOHMAW   | 141.822       | 3.684     | FIBVET   | 141.572       | 4.116     |
| NUKTOD   | 142.047       | 3.582     | SAXRIU   | 141.816       | 4.317     | LULXEX   | 141.565       | 3.964     |
| CEYSEF   | 142.046       | 4.162     | ALIQES   | 141.814       | 4.349     | GUNGUU   | 141.564       | 4.357     |
| SOMNOA   | 142.032       | 3.282     | PAGSUP   | 141.811       | 3.946     | WENDEA   | 141.563       | 3.797     |
| DEZYAL   | 142.023       | 4.339     | UJEYIT   | 141.804       | 4.199     | QIBNOE02 | 141.563       | 3.988     |
| DEYVUA   | 142.022       | 3.462     | XULFEQ   | 141.802       | 4.115     | NAZZOG01 | 141.55        | 3.698     |
| WEMZUJ   | 142.021       | 3.77      | NAZZOG   | 141.796       | 3.683     | TUJWED   | 141.549       | 3.688     |

| Refcodes | ∠YZnO   | d <sub>ZnO</sub> | Refcodes | ∠YZnO   | d <sub>ZnO</sub> | Refcodes | ∠YZnO   | d <sub>ZnO</sub> |
|----------|---------|------------------|----------|---------|------------------|----------|---------|------------------|
| ACEPIL   | 142.021 | 3.87             | MARGES   | 141.796 | 4.357            | QAKFOA   | 141.543 | 4.297            |
| XACMOD   | 142.017 | 4.375            | PEMRIK   | 141.789 | 4.196            | CORCIX   | 141.541 | 4.181            |
| AYUKIQ   | 142.016 | 4.238            | MEFXII   | 141.786 | 4.219            | TOLMUF   | 141.538 | 3.619            |
| QAKFOA   | 142.012 | 4.375            | KUJZAT   | 141.784 | 4.277            | MARDAN   | 141.532 | 4.106            |
| FOWQEQ   | 142.003 | 3.989            | KEPGOF   | 141.782 | 3.993            | WUPTEI   | 141.528 | 3.787            |
| YEVVOL   | 142.002 | 4.24             | OMEXIQ   | 141.778 | 4.259            | TUZJOO   | 141.522 | 3.732            |
| EYERAB   | 142.001 | 4.006            | HATCEN   | 141.773 | 3.981            | EMECUV   | 141.521 | 4.158            |
| MIQVAL   | 141.995 | 3.76             | POLDOL   | 141.768 | 4.233            | WENTAN01 | 141.52  | 4.224            |
| YUZQIV   | 141.992 | 4.277            | ITOBES   | 141.767 | 4.057            | FASWED   | 141.517 | 4.27             |
| YOCKUW   | 141.971 | 3.088            | XOJXIE   | 141.753 | 4.33             | QIBNOE01 | 141.516 | 3.996            |
| VIBJIA   | 141.968 | 3.889            | AXOSOY   | 141.749 | 3.756            | MUHHUT   | 141.512 | 3.962            |
| HAIJBAW  | 141.963 | 4.213            | GIKRIF   | 141.747 | 4.29             | YUTGIF   | 141.512 | 4.149            |
| NAZZOG01 | 141.963 | 3.698            | MEMXAD   | 141.744 | 4.22             | WENDEA   | 141.511 | 3.879            |
| TIVJIT   | 141.962 | 4.243            | IXOQOE   | 141.735 | 4.233            | XELNOS02 | 141.51  | 4.156            |
| GAKDAX   | 141.962 | 4.275            | XINTAS   | 141.733 | 4.103            | OPOZAV   | 141.51  | 3.34             |
| ZEJSUF   | 141.96  | 4.128            | AGOHOV   | 141.725 | 4.299            | NOFHUM   | 141.504 | 3.87             |
| YUZQER   | 141.951 | 4.296            | HEJMUI   | 141.714 | 3.943            | GEHYEB   | 141.503 | 4.118            |
| AQEYOK   | 141.944 | 4.003            | LUKRIT01 | 141.699 | 4.052            | XIXPAW   | 141.499 | 3.88             |
| VAKTIO   | 141.934 | 3.415            | GECXUHO2 | 141.688 | 4.157            | KEHNIW   | 141.499 | 3.864            |
| NACHOR   | 141.926 | 3.871            | DEBSUZ   | 141.682 | 3.872            | POCQUU   | 141.499 | 4.383            |
| OXPAZN   | 141.918 | 3.875            | GASSUR   | 141.673 | 3.266            | KEDQOB   | 141.497 | 3.723            |
| CEBCUJ   | 141.918 | 4.1              | UTUBAP   | 141.67  | 3.228            | MIQVEP   | 141.496 | 3.793            |
| UVIKAO   | 141.916 | 3.941            | OQEYUG   | 141.653 | 4.229            | AGUJOC   | 141.482 | 3.903            |
| GECXUHO2 | 141.907 | 4.145            | UDOQAH   | 141.644 | 4.325            | RUDWUJ   | 141.469 | 3.816            |
| LUKRIT   | 141.905 | 4.056            | LISXEU   | 141.643 | 4.397            | MUYCOB   | 141.469 | 4.156            |
| BEQPAQ   | 141.9   | 4.269            | BECKEC   | 141.641 | 3.941            | EYERAB   | 141.458 | 4.067            |
| XUYVAS   | 141.899 | 3.323            | BOYSIT   | 141.639 | 4.142            | MOHRAD   | 141.457 | 3.973            |
| XIXPEA   | 141.89  | 3.788            | MIQSIR   | 141.632 | 3.461            | RUHWIA   | 141.451 | 3.437            |
| RENXOZ   | 141.884 | 3.19             | LOZKES   | 141.628 | 3.854            | QAHVUS   | 141.45  | 4.094            |
| WALBOC02 | 141.881 | 4.098            | VEHLUQ   | 141.625 | 3.977            | SOMNOA   | 141.444 | 3.259            |
| MADQUG   | 141.88  | 4.376            | MIMRAB02 | 141.623 | 4.172            | GIZGAA   | 141.439 | 4.348            |
| KENJUK   | 141.872 | 3.99             | FALMUC   | 141.617 | 3.834            | NAHHUB   | 141.439 | 4.127            |
| HUQWOG   | 141.435 | 4.032            | MOKZUJ   | 141.192 | 4.383            | TOTNAU   | 140.996 | 3.907            |
| IFABIA01 | 141.434 | 4.161            | RERKUW   | 141.187 | 4.173            | RIRWUN   | 140.99  | 4.368            |
| FODMUJ   | 141.424 | 3.365            | GANGIM   | 141.184 | 4.313            | HOCCIO   | 140.978 | 4.325            |
| NIKMAZ   | 141.411 | 4.34             | MEWPIQ   | 141.18  | 3.275            | GEJBOQ   | 140.973 | 3.89             |
| LEQWIP   | 141.401 | 4.149            | ULEXER   | 141.178 | 4.066            | VIBJIA   | 140.972 | 3.879            |
| KEBGIK   | 141.399 | 3.811            | MONDUQ   | 141.172 | 4.02             | LONRAK   | 140.967 | 4.02             |
| MEWPIQ   | 141.397 | 3.429            | WETFIN   | 141.17  | 4.194            | FETPOM   | 140.958 | 3.935            |
| QICTEC   | 141.395 | 3.965            | HOGYIO   | 141.163 | 4.349            | OKUXUQ   | 140.954 | 3.786            |
| JIPVUD   | 141.392 | 3.192            | EHAMEH   | 141.162 | 3.99             | MOTTUM   | 140.953 | 4.27             |
| XOYDEX   | 141.39  | 3.319            | HAGHII   | 141.16  | 3.309            | EMEZIG   | 140.948 | 4.06             |
| FIKNIX   | 141.386 | 4.265            | TIWSEZ   | 141.159 | 4.297            | RAHFIP   | 140.944 | 4.19             |
| QASZOC   | 141.381 | 4.303            | CATBAD   | 141.159 | 3.966            | MEZNIR   | 140.941 | 3.912            |
| VUMNAU   | 141.38  | 3.962            | PUDZAQ   | 141.154 | 4.178            | GEVFAR   | 140.941 | 4.185            |
| JEVCAP   | 141.378 | 4.258            | HUKSAK   | 141.154 | 3.212            | NEMVAD   | 140.936 | 4.152            |
| OTAMEC   | 141.376 | 4.311            | UQUSAB   | 141.153 | 4.114            | LASMEZ   | 140.936 | 3.814            |
| IFABIA03 | 141.376 | 4.158            | MIXWUO   | 141.153 | 4.153            | VARRUD   | 140.936 | 3.949            |
| NAHHUB   | 141.372 | 4.159            | WENTAN   | 141.149 | 4.248            | OHUQAJ   | 140.935 | 3.951            |
| UXIFAJ   | 141.361 | 3.911            | LUMLOW   | 141.146 | 4.361            | BEQPAQ   | 140.933 | 4.063            |
| MAPLIA   | 141.357 | 4.204            | FETPOM   | 141.143 | 3.893            | LASMEZ   | 140.929 | 3.696            |
| QENFAR   | 141.349 | 3.612            | YUQQEI   | 141.136 | 3.453            | ULUQAW   | 140.925 | 3.765            |
| NUWWIM   | 141.337 | 4.333            | UZAWAU   | 141.132 | 3.924            | POCQUU   | 140.921 | 4.32             |
| DUZQOG   | 141.335 | 4.341            | EVURUJ   | 141.13  | 4.258            | PUMGOV   | 140.918 | 4.104            |
| GECXUH01 | 141.334 | 4.209            | FUJBIX   | 141.124 | 4.065            | TEGQEF   | 140.909 | 4.133            |
| YUXWEV   | 141.33  | 4.171            | CAYFUE   | 141.112 | 3.718            | CORLOM   | 140.907 | 4.065            |
| REYCIJ   | 141.322 | 3.74             | TEYYIH   | 141.111 | 3.86             | SOMPUI   | 140.903 | 3.853            |
| NANHAO   | 141.318 | 4.354            | GUJFIB   | 141.109 | 4.224            | OCOKUM   | 140.9   | 4.229            |
| QIDQON   | 141.315 | 3.798            | LIHXUX   | 141.108 | 4.396            | URABIA   | 140.897 | 4.081            |



| Refcodes | $\angle YZnO$ | $d_{ZnO}$ | Refcodes | $\angle YZnO$ | $d_{ZnO}$ | Refcodes | $\angle YZnO$ | $d_{ZnO}$ |
|----------|---------------|-----------|----------|---------------|-----------|----------|---------------|-----------|
| MIMRAB   | 141.312       | 4.192     | YEPKUC   | 141.107       | 3.927     | GICTAN   | 140.896       | 4.016     |
| DAGXUF   | 141.312       | 4.403     | DUCKAQ   | 141.104       | 4.202     | LEHMUK   | 140.89        | 4.162     |
| NEMTUV   | 141.284       | 4.198     | COKCEN   | 141.103       | 4.094     | DOZFOO   | 140.886       | 4.073     |
| JEQPEB   | 141.284       | 3.896     | GUCQIH   | 141.101       | 4.178     | MUZVOS   | 140.882       | 3.657     |
| FODGAI   | 141.283       | 3.987     | GOZGOT   | 141.098       | 3.976     | OQECUJ   | 140.877       | 4.107     |
| BUQROV   | 141.263       | 4.05      | ETOLEG   | 141.093       | 4.276     | OYAZUL02 | 140.871       | 4.062     |
| FITNIH   | 141.263       | 3.957     | LIDWAA   | 141.089       | 4.208     | BOPHAR   | 140.865       | 3.273     |
| PIYJEQ   | 141.254       | 4.169     | IGOPAW   | 141.08        | 4.399     | NUWWIM   | 140.852       | 3.792     |
| JAVJIA   | 141.246       | 4.106     | GURPUG   | 141.076       | 4.09      | MOJKAY   | 140.85        | 4.229     |
| FEWREH   | 141.235       | 3.477     | KUHCIC   | 141.073       | 3.738     | MIQVAL   | 140.849       | 4.112     |
| SOTJAN   | 141.227       | 4.051     | FAVHEQ   | 141.07        | 3.907     | QARVEL01 | 140.845       | 4.3       |
| GECXUH   | 141.227       | 4.196     | QARVEL   | 141.054       | 4.311     | FAZSEH   | 140.841       | 4.172     |
| GARMAR   | 141.224       | 4.234     | QICTAY   | 141.052       | 4.38      | FICBOM   | 140.833       | 4.36      |
| AFEJAX   | 141.216       | 3.326     | TOTNAU01 | 141.052       | 3.905     | MUYPIH   | 140.827       | 4.397     |
| MUJKEI   | 141.215       | 4.346     | TAWVEU   | 141.051       | 3.868     | UKAWOV   | 140.826       | 4.095     |
| RIDWUX   | 141.209       | 3.931     | IDUFOF   | 141.049       | 4.402     | GLYZNS10 | 140.821       | 4.049     |
| GECXUH03 | 141.208       | 4.204     | WEWVOM   | 141.049       | 4.114     | NELMEZ   | 140.815       | 3.29      |
| WOTREF   | 141.207       | 3.867     | TEYYED   | 141.035       | 3.877     | AFEJAX   | 140.813       | 3.958     |
| AJOVUS   | 141.2         | 3.929     | VAKTIO   | 141.017       | 4.039     | XOFTAP   | 140.812       | 4.026     |
| JESSUW   | 141.197       | 3.656     | EPEYII   | 141.016       | 4.138     | RUZSUA   | 140.807       | 3.857     |
| RAGVIH   | 141.195       | 4.089     | LIMDOE   | 141.008       | 3.679     | WUPTAE   | 140.794       | 3.726     |
| NENCOZ   | 141.194       | 3.9       | AJOVUS   | 141.002       | 4.091     | VEHMUS   | 140.793       | 3.828     |
| GECXUH   | 140.791       | 4.189     | SISTUN   | 140.613       | 4.024     | CAYWEG   | 140.388       | 4.032     |
| SOMNOA   | 140.79        | 3.232     | NESGAU   | 140.603       | 2.881     | EHEWIY   | 140.381       | 4.33      |
| FUPQOW   | 140.788       | 4.223     | ONIWAK   | 140.601       | 3.975     | ROGMEG   | 140.379       | 3.315     |
| UJULOC   | 140.785       | 3.971     | NARKEA   | 140.6         | 3.753     | RACYAW   | 140.371       | 3.912     |
| KEGTAU   | 140.782       | 4.101     | IBICIH   | 140.598       | 4.406     | DONREE   | 140.364       | 4.374     |
| COLCUD   | 140.781       | 4.047     | YEKWOE   | 140.589       | 4.151     | QQQAZD01 | 140.36        | 3.989     |
| DAWQOK   | 140.776       | 3.906     | LUVBAH   | 140.588       | 4.396     | YEFKAY   | 140.346       | 3.874     |
| KEDBON   | 140.771       | 4.113     | DIHTAR   | 140.587       | 3.767     | IBICAZ   | 140.344       | 4.402     |
| TISGOR   | 140.766       | 3.877     | XEYSOM   | 140.582       | 3.848     | LIMNOL   | 140.338       | 4.235     |
| KUCVEL   | 140.763       | 3.99      | JIWPAJ   | 140.58        | 3.871     | ZEQQEU   | 140.332       | 3.983     |
| UVIKAO   | 140.761       | 3.849     | GECXUH01 | 140.577       | 4.194     | VAJMAV   | 140.331       | 4.071     |
| RAMRIJ   | 140.756       | 4.382     | GICLUB   | 140.575       | 4.195     | XATPUD   | 140.329       | 4.354     |
| DAXXAE   | 140.754       | 3.891     | XARZUN   | 140.57        | 3.908     | WENWUI   | 140.313       | 3.322     |
| QASZOC   | 140.75        | 4.32      | ETUCOM   | 140.569       | 3.866     | PIDMEV01 | 140.312       | 3.702     |
| MUZWAF   | 140.747       | 4.296     | AQUHIG   | 140.569       | 4.258     | JABKAY   | 140.303       | 3.716     |
| SENFUP   | 140.743       | 3.327     | LOQLAF   | 140.567       | 4.274     | MOHLEB   | 140.302       | 4.193     |
| BEPMIU   | 140.742       | 4.17      | VARZEV   | 140.563       | 4.169     | OMIDAQ   | 140.299       | 4.277     |
| XOHNEO   | 140.74        | 3.929     | SADFAH   | 140.558       | 3.871     | LELDEM   | 140.297       | 4.348     |
| HAGQOV   | 140.727       | 3.797     | BAVYON   | 140.55        | 3.087     | KUKHEF   | 140.294       | 4.233     |
| LAFXUP   | 140.726       | 4.265     | LEHNAR   | 140.547       | 4.329     | JAVCEP   | 140.293       | 4.332     |
| ETUXUM   | 140.721       | 3.749     | ARIFIQ   | 140.538       | 3.856     | WIGTEP   | 140.287       | 3.262     |
| HATHET   | 140.715       | 4.127     | UMAWOV   | 140.535       | 4.037     | QUWHOG   | 140.283       | 4.265     |
| RUZPOR   | 140.714       | 3.863     | JIWNOV   | 140.513       | 4.18      | JIWNIP   | 140.281       | 4.172     |
| LEDLAJ   | 140.71        | 4.195     | LIGVAY   | 140.513       | 3.887     | QASZOC   | 140.279       | 4.278     |
| COFCIL   | 140.707       | 3.848     | XUWGAY   | 140.511       | 4.202     | NOHFAU   | 140.275       | 3.7       |
| AVAVUQ   | 140.702       | 3.928     | BUBLIV   | 140.501       | 4.41      | GASSUR   | 140.264       | 3.245     |
| HEJMOC   | 140.699       | 3.98      | IJUGOJ   | 140.491       | 4.303     | REYCIJ   | 140.261       | 4.336     |
| MULKOT   | 140.699       | 3.849     | DIWREJ   | 140.49        | 4.114     | VIXVIJ   | 140.261       | 3.941     |
| XEKYOE   | 140.697       | 3.279     | UJEYIT   | 140.49        | 4.383     | QUJZAZ   | 140.259       | 3.188     |
| AXOSOY   | 140.686       | 3.444     | RADWOI   | 140.488       | 3.991     | UKEHOJ   | 140.246       | 4.028     |
| REGQUT   | 140.685       | 3.979     | CUWNOA   | 140.487       | 3.159     | FURDEB   | 140.244       | 4.084     |
| IZOWAW   | 140.68        | 3.475     | YINXAV   | 140.483       | 4.204     | WALCET   | 140.241       | 4.186     |
| NOHDOG   | 140.68        | 3.81      | YACYUX   | 140.479       | 4.129     | RUDMUZ   | 140.236       | 3.73      |
| SOFZAP   | 140.676       | 4.045     | UTIPUK   | 140.474       | 3.011     | BAMZAR   | 140.231       | 4.029     |
| AJEDEZ   | 140.672       | 4.093     | PUKLIT   | 140.471       | 4.092     | FOWQEQ   | 140.23        | 4.152     |
| DISWOU   | 140.668       | 4.02      | XECTEG   | 140.469       | 3.468     | IWORET   | 140.228       | 4.047     |
| SIJLED   | 140.668       | 4.256     | QANTIJ   | 140.467       | 3.767     | AQIFOW   | 140.22        | 4.331     |

| Refcodes  | ∠YZnO   | d <sub>ZnO</sub> | Refcodes | ∠YZnO   | d <sub>ZnO</sub> | Refcodes | ∠YZnO   | d <sub>ZnO</sub> |
|-----------|---------|------------------|----------|---------|------------------|----------|---------|------------------|
| OXPAZN    | 140.666 | 4.076            | RIRWUN   | 140.46  | 4.283            | ENANAJ   | 140.215 | 3.917            |
| DUHHIZ    | 140.658 | 4.339            | MUDFEW   | 140.433 | 4.206            | DATFUZ   | 140.215 | 3.73             |
| GE CXUH03 | 140.651 | 4.192            | FOWQEQ   | 140.432 | 4.255            | COTJUT   | 140.212 | 3.825            |
| UTAPIQ    | 140.648 | 3.985            | QOMFEF   | 140.423 | 3.839            | XIQFIO   | 140.198 | 4.372            |
| KUBTOR    | 140.646 | 3.676            | HIYNIN   | 140.412 | 4.209            | DUCKAQ   | 140.188 | 4.176            |
| SOLBAY    | 140.638 | 4.178            | VIRLAK   | 140.411 | 4.288            | SACYII   | 140.18  | 4.18             |
| KILYAJ    | 140.627 | 3.935            | YEFKAY01 | 140.407 | 3.88             | MOFWUA   | 140.176 | 4.193            |
| ZELPAL    | 140.624 | 4.03             | ZOCFAB   | 140.406 | 4.136            | WIRCUX   | 140.175 | 4.359            |
| UWADUT01  | 140.616 | 3.966            | NIRRUE   | 140.404 | 4.397            | SOWCOY   | 140.169 | 3.32             |
| SARXAO    | 140.615 | 4.274            | KIKZAG   | 140.401 | 4.077            | SUVWIR   | 140.159 | 4.269            |
| HOXTUL    | 140.615 | 4.325            | FEDYEU   | 140.391 | 3.904            | LETRUB   | 140.158 | 3.681            |
| ITESUY    | 140.613 | 3.992            | RAXNAH   | 140.391 | 3.886            | GILFUF   | 140.148 | 3.258            |
| KILXUC    | 140.144 | 3.953            | DEKGAD   | 139.904 | 3.629            | TIVJIT   | 139.673 | 4.204            |
| HUKSAK    | 140.136 | 3.318            | MIQVEP   | 139.903 | 4.147            | XOZJOL   | 139.663 | 3.699            |
| KAPWUV    | 140.131 | 4.187            | MORLIR   | 139.894 | 3.321            | HUZDUD   | 139.659 | 4.029            |
| YEKVAP    | 140.126 | 3.301            | DOVHEB   | 139.886 | 3.756            | NEPPAZ   | 139.653 | 3.786            |
| TEFQUQ    | 140.122 | 4.212            | RANQAA   | 139.879 | 4.047            | ICUPUV   | 139.647 | 3.706            |
| HUPXUM    | 140.121 | 3.689            | UMAWOV   | 139.877 | 3.711            | HOHGAN   | 139.638 | 4.201            |
| LEVCAU    | 140.117 | 3.821            | AWEJOE   | 139.875 | 4.348            | LASMEZ   | 139.636 | 4.311            |
| AWIGAQ    | 140.116 | 3.998            | ULIBOG   | 139.871 | 4.06             | BODQAP   | 139.624 | 3.7              |
| OGOWEN    | 140.114 | 4.129            | RAMSAC   | 139.868 | 4.314            | BOPHAR   | 139.623 | 3.333            |
| LESFAT    | 140.108 | 4.055            | JIQDUM   | 139.866 | 3.794            | QETBOG   | 139.61  | 4.162            |
| TIKXET    | 140.107 | 4.195            | PAKVOM   | 139.853 | 4.404            | EVURUJ   | 139.607 | 4.122            |
| HIQVUZ    | 140.104 | 4.169            | XIXPIE   | 139.84  | 3.765            | NUFBIB   | 139.603 | 4.12             |
| GEVFAR    | 140.103 | 4.028            | MODZIR   | 139.839 | 3.933            | BUQROV   | 139.601 | 4.082            |
| PAHROG    | 140.097 | 3.989            | JUFFUN   | 139.837 | 4.114            | HIKKOC   | 139.596 | 4.308            |
| RAMRUV    | 140.094 | 4.391            | WUTFAS   | 139.823 | 4.371            | MALFOU   | 139.59  | 4.181            |
| DASPUJ    | 140.093 | 4.321            | IQIBAN   | 139.822 | 4.344            | IJEDIL   | 139.589 | 4.214            |
| KAPWUV    | 140.091 | 4.359            | MOSNEN   | 139.817 | 4.315            | KOGGIX   | 139.588 | 4.174            |
| ASEROI    | 140.088 | 4.09             | OMEBIS   | 139.81  | 4.087            | SUWZOC   | 139.578 | 4.038            |
| GEFSIW    | 140.085 | 4.007            | CUYTUM   | 139.8   | 4.031            | AYISEH   | 139.577 | 3.484            |
| XIZGAO    | 140.081 | 3.958            | QUBKII   | 139.791 | 4.052            | SOVTOO   | 139.571 | 4.008            |
| IXOSOE    | 140.075 | 4.145            | LASMEZ   | 139.788 | 3.655            | SOVTOO01 | 139.571 | 4.008            |
| NOVQOH    | 140.058 | 4.05             | MOHRAD   | 139.788 | 4.323            | VIZPAY   | 139.568 | 4.167            |
| VIGBAQ    | 140.045 | 4.188            | HOQZUJ   | 139.787 | 3.633            | NIPWIT01 | 139.566 | 4.239            |
| WUPTEI    | 140.034 | 4.351            | ZAWHIQ   | 139.785 | 4.261            | WOTREF   | 139.563 | 4.017            |
| TEFQOL    | 140.034 | 3.95             | ZIJEZ    | 139.783 | 3.948            | NIPWIT   | 139.556 | 4.26             |
| XASCQU    | 140.022 | 4.258            | SUPGAO   | 139.782 | 2.745            | XOMMIX   | 139.553 | 4.314            |
| SIFPEF    | 140.02  | 4.375            | MUHVIV   | 139.776 | 4.369            | FISCEQ   | 139.546 | 4.276            |
| ENUQIO    | 140.014 | 3.62             | HEXGUO   | 139.773 | 3.003            | RASFID   | 139.535 | 4.206            |
| YOGTIA    | 140.014 | 4.194            | JAYJOJ   | 139.772 | 3.989            | LUZDOB   | 139.535 | 4.014            |
| VADCAI    | 140.008 | 4.199            | TABSIA   | 139.769 | 3.852            | KEDRAO   | 139.527 | 4.18             |
| MOJKAY    | 139.985 | 4.205            | QAVBIA   | 139.763 | 4.176            | NAFHAE   | 139.525 | 4.28             |
| KUBZIR    | 139.98  | 4.302            | HOQZUJ01 | 139.763 | 3.641            | HIQREF   | 139.523 | 4.363            |
| QUFFED    | 139.972 | 3.004            | MORLIR   | 139.749 | 3.374            | IKEMUI   | 139.522 | 3.595            |
| HOVJEK    | 139.959 | 3.953            | VIZPAY   | 139.748 | 3.865            | RUZPOR   | 139.521 | 4.142            |
| DUQZOH    | 139.951 | 3.776            | JUKHII   | 139.745 | 3.422            | TADCUA   | 139.505 | 3.157            |
| LEDVOJ    | 139.951 | 4.359            | OFUNOW   | 139.743 | 4.076            | TERQEM   | 139.505 | 3.7              |
| NIQREK    | 139.951 | 4.196            | VAJLID   | 139.743 | 4.02             | MACHIJ   | 139.505 | 4.135            |
| QUBLAB    | 139.947 | 4.01             | OCEYEB   | 139.737 | 4.066            | ALUXEM   | 139.504 | 4.282            |
| CAHJII    | 139.944 | 3.982            | XOHNEO   | 139.736 | 3.74             | GOWHEI   | 139.497 | 3.763            |
| MUZVUY    | 139.942 | 4.3              | IQUMIQ   | 139.733 | 4.101            | KIYBED   | 139.493 | 3.799            |
| SEBBAF    | 139.94  | 4.249            | MAGBIH   | 139.729 | 4.327            | LAVWIO   | 139.489 | 4.089            |
| MULQOA    | 139.939 | 3.795            | WITFEM   | 139.723 | 3.834            | TUMREA   | 139.487 | 4.243            |
| IGAWET    | 139.938 | 3.955            | TERQEM   | 139.705 | 3.719            | EFOBIN   | 139.485 | 4.072            |
| SIHLAZ    | 139.925 | 4.047            | UJAPOL   | 139.704 | 4.107            | WITWEE   | 139.469 | 4.22             |
| POCQUU    | 139.921 | 3.935            | JUGXER   | 139.698 | 4.049            | OXPAZN   | 139.468 | 4.208            |
| MIGXEI    | 139.92  | 4                | QOMFEF   | 139.695 | 4.173            | OFUNOW   | 139.465 | 3.769            |
| FAKTOD    | 139.916 | 4.2              | YACSOM   | 139.692 | 3.959            | QUIJAZ   | 139.462 | 3.955            |

| Refcodes | ∠YZnO   | d <sub>ZnO</sub> | Refcodes | ∠YZnO   | d <sub>ZnO</sub> | Refcodes | ∠YZnO   | d <sub>ZnO</sub> |
|----------|---------|------------------|----------|---------|------------------|----------|---------|------------------|
| FODZAA   | 139.916 | 3.878            | KEHTOJ   | 139.684 | 2.951            | VAJLID   | 139.449 | 4.403            |
| ASUXUJ   | 139.911 | 4.043            | KIWZOJ   | 139.678 | 4.105            | CADCOD   | 139.446 | 3.877            |
| UKEZIV   | 139.442 | 3.982            | RUDROA   | 139.162 | 4.087            | DEBSUZ   | 139.012 | 4.271            |
| NUDNIL   | 139.441 | 4.032            | WUSFAU   | 139.161 | 4.176            | MULQOA   | 139.012 | 4.235            |
| USITOG   | 139.438 | 3.989            | GILFUF   | 139.155 | 3.385            | YOVVIQ   | 139.004 | 4.01             |
| ERIKOG   | 139.43  | 4.08             | AJIGEG   | 139.155 | 3.786            | OKUXUQ   | 138.999 | 4.135            |
| ESIRII   | 139.429 | 3.634            | UJUCIM   | 139.155 | 4.252            | YUXQIT02 | 138.988 | 3.726            |
| XIXPAW   | 139.421 | 3.826            | ROBQAB   | 139.153 | 3.962            | NACZIE   | 138.977 | 4.154            |
| JIWNIP   | 139.408 | 4.348            | ZUTNUZ   | 139.152 | 4.325            | GOCMUI   | 138.976 | 3.792            |
| ASIZAG   | 139.395 | 4.182            | PIBHUF   | 139.15  | 4.054            | PEWGOO   | 138.972 | 4.32             |
| DEBSUZ   | 139.392 | 4.116            | GAHXEU   | 139.15  | 3.983            | VIRLAK   | 138.971 | 4.408            |
| PIDMEV01 | 139.388 | 3.909            | CEZVIO   | 139.148 | 4.251            | VOPTAX   | 138.965 | 3.905            |
| GAKQER   | 139.382 | 4.395            | YUXQIT01 | 139.147 | 3.721            | ZIFCUO   | 138.965 | 3.857            |
| AQIFOW   | 139.381 | 3.981            | DEKGAD   | 139.146 | 3.661            | IQEYOU   | 138.963 | 4.132            |
| SUZGOM   | 139.367 | 3.94             | GIXPAG   | 139.145 | 4.065            | COWCAU   | 138.958 | 3.893            |
| UKIMEI   | 139.364 | 3.942            | ULEXER   | 139.144 | 4.349            | WENTAN01 | 138.953 | 4.329            |
| HIQNAY   | 139.337 | 3.573            | KUTRUO   | 139.141 | 4.384            | XUXQAJ   | 138.952 | 4.224            |
| PETFON   | 139.335 | 3.929            | ROBQAB   | 139.137 | 4.136            | ASIYUZ   | 138.95  | 4.005            |
| ATAHAE   | 139.333 | 3.707            | FEBYIW   | 139.136 | 4.272            | PIDMEV   | 138.949 | 3.687            |
| IGUMEF   | 139.328 | 4.34             | VEGSAF   | 139.136 | 3.469            | DEQFOX   | 138.945 | 4.117            |
| JIWNOV   | 139.325 | 4.386            | BEPPAP   | 139.135 | 4.155            | ICUFIW   | 138.936 | 4.308            |
| MIXLAI   | 139.321 | 3.983            | KEXWOA   | 139.133 | 4.07             | KIXLAG   | 138.934 | 4.037            |
| HOGYIO   | 139.316 | 4.404            | USITOG   | 139.126 | 3.865            | WEZNUM   | 138.932 | 4.256            |
| AWIGAQ   | 139.314 | 4.174            | PUMGOV   | 139.124 | 4.131            | VARRUD   | 138.932 | 3.975            |
| RADWOI   | 139.312 | 3.865            | VIBJEW   | 139.12  | 3.958            | LAVWIO   | 138.93  | 3.736            |
| RILWOA   | 139.308 | 4.082            | XAGQAZ01 | 139.117 | 4.388            | DEHFIH   | 138.914 | 4.223            |
| XUQHOH   | 139.306 | 3.323            | EMOJUM   | 139.102 | 4.217            | SIYQOH   | 138.908 | 3.754            |
| YUPKAW   | 139.304 | 4.128            | YUXQIT   | 139.1   | 3.723            | USITIA   | 138.903 | 4.07             |
| SUPGAO01 | 139.301 | 2.737            | KEMKET   | 139.094 | 4.046            | WIZGUI   | 138.895 | 3.667            |
| ENUDEX   | 139.285 | 4.404            | JEBTIU   | 139.091 | 3.755            | TUMDAI   | 138.892 | 4.004            |
| UPOZEG   | 139.275 | 4.061            | IJIVIH   | 139.086 | 4.16             | LEVDUL   | 138.889 | 3.74             |
| XAGQAZ   | 139.27  | 4.387            | DEYVUA   | 139.084 | 3.29             | KOQJIL   | 138.876 | 4.368            |
| BIZFUL   | 139.265 | 3.893            | WUPTAE   | 139.083 | 4.209            | VIQMEO   | 138.871 | 4.022            |
| GOJHUJ   | 139.26  | 3.013            | EKOLOG   | 139.082 | 3.92             | IGUGAT   | 138.869 | 3.955            |
| LECMOW   | 139.26  | 4.278            | PASDEU   | 139.08  | 4.149            | BASZUU   | 138.868 | 3.804            |
| FEDYAQ   | 139.256 | 3.783            | WEXHIS   | 139.077 | 4.217            | AWEYAE   | 138.863 | 3.314            |
| CAWLIY   | 139.255 | 2.875            | WURQUW   | 139.075 | 4.074            | NINSOW   | 138.855 | 4.073            |
| SOCGOJ   | 139.252 | 3.911            | FASWED   | 139.073 | 4.354            | KEYPAG   | 138.855 | 4.344            |
| AYISEH01 | 139.231 | 3.46             | RAHFIP   | 139.058 | 4.134            | AGAWUA   | 138.855 | 4.015            |
| NIYNUG   | 139.221 | 3.959            | NOLYIW   | 139.058 | 3.736            | KUBVOT   | 138.854 | 4.055            |
| FURDEB   | 139.221 | 3.93             | NEVHOL   | 139.058 | 3.807            | QIBNOE01 | 138.853 | 4.129            |
| NELMEZ   | 139.216 | 3.917            | HEJMOC   | 139.056 | 4.012            | DEHPOX   | 138.853 | 4.253            |
| VIJNUZ   | 139.215 | 3.977            | WAVDAY   | 139.056 | 4.151            | SIJHUR   | 138.851 | 4.105            |
| QAHNUK   | 139.205 | 3.953            | YUXWEV   | 139.04  | 4.391            | JAZKII   | 138.847 | 3.232            |
| UKEHOJ   | 139.202 | 4.142            | LEHNAR   | 139.033 | 3.917            | PEJPOL   | 138.845 | 4.262            |
| SIBYAG   | 139.199 | 4.252            | GUQTOB   | 139.029 | 3.545            | QUZWEO   | 138.842 | 3.62             |
| DUPRAI   | 139.175 | 4.026            | GEFSIW   | 139.027 | 4.303            | UZIDAJ   | 138.84  | 3.785            |
| VODMAD   | 139.175 | 4.162            | QIDREE   | 139.025 | 3.912            | TEGRUS   | 138.837 | 4.307            |
| RUNVEC   | 139.17  | 4.217            | FAKTOD   | 139.021 | 4.245            | CAHJII   | 138.836 | 3.398            |
| HIYNIN   | 139.166 | 4.035            | REFLEV   | 139.019 | 4.307            | HOZRUM   | 138.835 | 3.994            |
| NUWPAZ   | 139.164 | 4.068            | GAYZOV   | 139.014 | 3.936            | QIDRII   | 138.831 | 3.92             |
| XUYXEY   | 138.831 | 4.275            | IXOQOE   | 138.611 | 4.194            | XELNOS   | 138.31  | 4.149            |
| PAVZES   | 138.831 | 3.848            | EXETIN   | 138.606 | 3.965            | XIXNUO   | 138.31  | 3.88             |
| MIBJAK   | 138.822 | 4.333            | OKIHUO   | 138.605 | 4.244            | EBEZAQ   | 138.302 | 3.897            |
| CIRGAP   | 138.821 | 3.983            | FAFWEQ   | 138.596 | 4.299            | OYAPOV   | 138.302 | 2.864            |
| OKUXUQ   | 138.806 | 4.027            | GUCQIH   | 138.581 | 4.048            | QANZEL   | 138.299 | 3.936            |
| TUFJAG   | 138.806 | 3.926            | ZODGEH   | 138.572 | 3.724            | CIFBUQ   | 138.298 | 3.813            |
| NAHHUB   | 138.804 | 4.053            | JAZKII   | 138.567 | 3.297            | YAFTOO   | 138.285 | 4.254            |
| ECEZEV   | 138.801 | 4.102            | MADQUG   | 138.567 | 4.159            | OKIJEI   | 138.28  | 3.664            |

| Refcodes | $\angle YZnO$ | $d_{ZnO}$ | Refcodes | $\angle YZnO$ | $d_{ZnO}$ | Refcodes | $\angle YZnO$ | $d_{ZnO}$ |
|----------|---------------|-----------|----------|---------------|-----------|----------|---------------|-----------|
| KARXIL   | 138.798       | 3.949     | RAMROP   | 138.566       | 4.243     | SACYII   | 138.259       | 4.173     |
| AJOVUS   | 138.795       | 3.929     | XIDBOF   | 138.561       | 3.567     | KARXIL   | 138.25        | 4.127     |
| VENMIL   | 138.781       | 4.294     | CESQUP   | 138.56        | 3.41      | TOJBIF   | 138.238       | 4.093     |
| DIHNEO   | 138.78        | 4.208     | PASDEU   | 138.558       | 3.662     | EZEJOL   | 138.233       | 4.403     |
| VUPQON   | 138.78        | 4.266     | BOVLAA   | 138.557       | 3.897     | JIWNUB   | 138.222       | 4.376     |
| GIXPIQ   | 138.778       | 3.868     | LUWSIF   | 138.557       | 4.115     | XINQAQ   | 138.22        | 4.315     |
| WENTAN   | 138.777       | 4.345     | JOFDUG   | 138.556       | 4.308     | AWEYAE   | 138.218       | 3.441     |
| QIBNOE   | 138.773       | 4.126     | HOXTUL   | 138.546       | 4.33      | ASALIP   | 138.218       | 4.161     |
| FESTEG   | 138.771       | 4.061     | JESSUW   | 138.539       | 4.332     | CEBCUJ   | 138.211       | 3.915     |
| AGUJUI   | 138.766       | 3.582     | ROQKIT   | 138.522       | 3.789     | GAPDAE   | 138.21        | 3.818     |
| XOLQIY   | 138.765       | 4.214     | OMIDAQ   | 138.518       | 4.068     | DEFHUT   | 138.209       | 3.924     |
| RIDWUX   | 138.76        | 3.706     | LERVOV   | 138.497       | 3.781     | BEGZOE   | 138.203       | 3.982     |
| MAVNUU   | 138.758       | 4.114     | ESEVON   | 138.492       | 4.22      | MOJZUG   | 138.202       | 3.828     |
| NENXUC   | 138.745       | 4.094     | DILBIK   | 138.478       | 3.919     | UCEFER   | 138.196       | 4.197     |
| HOZRUM   | 138.744       | 3.854     | SAEDZN10 | 138.478       | 4.009     | NEKXOU   | 138.192       | 3.754     |
| QETFI    | 138.73        | 4.146     | AWIGE    | 138.476       | 4.219     | JAIBOO   | 138.186       | 4.054     |
| HUBMID   | 138.729       | 4.142     | LJIREC   | 138.463       | 4.131     | XELNOS02 | 138.185       | 4.134     |
| SEBBAF   | 138.728       | 3.941     | GUPBOK   | 138.45        | 3.649     | LAXSAH   | 138.182       | 4.213     |
| BEMHAG   | 138.726       | 3.98      | YANLAE   | 138.449       | 4.282     | MOTTUM   | 138.175       | 4.409     |
| KADXEU   | 138.724       | 4.186     | OXPAZN   | 138.449       | 3.802     | DISWOU   | 138.165       | 4.15      |
| IGAQEM   | 138.722       | 3.758     | XELNOS01 | 138.443       | 4.139     | OFUNOW   | 138.163       | 3.737     |
| XILGUU   | 138.717       | 4.329     | DAJCIE   | 138.439       | 4.105     | FISCEQ   | 138.161       | 4.105     |
| CATBAD   | 138.705       | 4.029     | TEDLUK   | 138.431       | 3.517     | PIVGUZ   | 138.16        | 3.702     |
| QIBNOE02 | 138.701       | 4.136     | INUGEE   | 138.427       | 4.286     | MIKYUE   | 138.154       | 4.089     |
| LOCWAE   | 138.701       | 3.901     | BOPZAJ   | 138.421       | 4.161     | XIXPIE   | 138.154       | 3.946     |
| XAXBOP   | 138.7         | 4.174     | POTWAZ   | 138.418       | 4.239     | LAVWIO   | 138.147       | 4.27      |
| YULHAR   | 138.695       | 3.953     | DINDIP   | 138.417       | 4.4       | PAVZES   | 138.142       | 4.371     |
| NAPHOD   | 138.687       | 4.193     | GARTID   | 138.415       | 4.366     | HUZZUY   | 138.141       | 4.185     |
| AVOKOM   | 138.683       | 3.707     | RIHDUJ   | 138.408       | 4.234     | UVUFEY   | 138.13        | 3.646     |
| HOVJEK   | 138.675       | 4.025     | FAHJAB   | 138.406       | 3.281     | VEGLOK   | 138.127       | 4.361     |
| CODVAV   | 138.671       | 4.068     | CIHJOU   | 138.404       | 4.032     | RAMHOC01 | 138.105       | 4.183     |
| SAHFEN   | 138.661       | 4.4       | LUNBIF   | 138.403       | 3.705     | XELTOZ   | 138.09        | 4.104     |
| ULEQEJ   | 138.66        | 3.904     | TENLUX   | 138.391       | 3.488     | GVVSEW   | 138.085       | 3.196     |
| LAXSAH   | 138.659       | 4.293     | KAWXUB   | 138.371       | 3.922     | VUSHIC   | 138.084       | 4.316     |
| RAGVIH   | 138.652       | 4.074     | GUCZAG   | 138.362       | 4.277     | ZETLER   | 138.082       | 3.301     |
| CAVFEN   | 138.619       | 3.662     | OKUXUQ   | 138.355       | 4.199     | FISZAK   | 138.077       | 4.119     |
| FAKXAT   | 138.617       | 4.053     | ROYIYQ   | 138.347       | 4.298     | HOJCOY   | 138.076       | 3.867     |
| MOJKAY   | 138.616       | 4.384     | LEKNUN   | 138.347       | 3.409     | QAKFOA   | 138.075       | 3.777     |
| BIZFUL   | 138.615       | 3.93      | XECTEG   | 138.332       | 3.428     | XUXQEN   | 138.066       | 3.935     |
| KAVVUA   | 138.614       | 4.226     | NAKPUM   | 138.32        | 3.975     | DEHFUR01 | 138.064       | 3.777     |
| YIMWAU   | 138.612       | 4.267     | OXUROQ   | 138.314       | 4.345     | NAKPUM   | 138.061       | 4.272     |
| VIZSEE   | 138.052       | 4.289     | NEYTOD   | 137.848       | 4.284     | BOVLAA   | 137.684       | 4.058     |
| MEGNUK   | 138.04        | 4.339     | VIRLAK   | 137.847       | 4.264     | ECOZUT   | 137.684       | 3.765     |
| WAJGAQ   | 138.038       | 4.209     | NACHOR   | 137.845       | 3.651     | ESASUN   | 137.678       | 4.064     |
| HUBMID   | 138.031       | 4.092     | QIBNOE01 | 137.843       | 3.797     | DEHFUR   | 137.677       | 3.753     |
| VAJSUW   | 138.03        | 3.686     | FAVPEA   | 137.835       | 3.347     | TOTNAU01 | 137.676       | 3.947     |
| ADEKEB   | 138.022       | 4.232     | JONXIV   | 137.832       | 4.376     | VENMIL   | 137.674       | 4.174     |
| XUXQEN   | 138.014       | 4.056     | TOLHEI   | 137.829       | 4.217     | QUJDAC   | 137.672       | 4.337     |
| YEPKOW   | 138.01        | 3.928     | GUVFUY   | 137.822       | 4.332     | ZZZDVY02 | 137.67        | 3.965     |
| TOTMIB   | 138.007       | 4.016     | ZETLER   | 137.822       | 3.477     | NEYVAR   | 137.664       | 4.289     |
| XAPXOB   | 138.004       | 4.014     | WESVAS   | 137.818       | 4.086     | LIXZUP   | 137.651       | 3.712     |
| CAHHOL   | 137.989       | 3.906     | IPAPEU   | 137.818       | 4.303     | NIJTIJ   | 137.644       | 4.131     |
| NEWZEX   | 137.979       | 4.128     | GOWMEM   | 137.816       | 4.391     | AGUJUI   | 137.636       | 4.071     |
| AYISEH   | 137.978       | 4.002     | BUZGUZ   | 137.813       | 4.312     | YUVWOB   | 137.628       | 3.835     |
| HOPXAM   | 137.977       | 4.151     | FORWOA   | 137.81        | 4.005     | ATOWUE   | 137.621       | 3.765     |
| BINBAE   | 137.973       | 4.279     | QIBNOE02 | 137.805       | 3.804     | XULFEQ   | 137.62        | 3.945     |
| FEBFIC   | 137.973       | 3.95      | ASEDEK   | 137.794       | 4.225     | NEYVEV   | 137.619       | 4.317     |
| NEQDIW   | 137.969       | 3.962     | NUJVAS   | 137.791       | 3.944     | XACRUQ   | 137.618       | 4.346     |
| XIZGAO   | 137.962       | 3.929     | CAPWAU   | 137.789       | 3.96      | LOZQEY   | 137.618       | 4.07      |

| Refcodes | ∠YZnO   | d <sub>ZnO</sub> | Refcodes | ∠YZnO   | d <sub>ZnO</sub> | Refcodes | ∠YZnO   | d <sub>ZnO</sub> |
|----------|---------|------------------|----------|---------|------------------|----------|---------|------------------|
| WIJDAV   | 137.958 | 4.162            | GUWXIG   | 137.786 | 4.083            | PIPKAC   | 137.615 | 4.077            |
| KATHUM   | 137.954 | 3.974            | DEHFUR   | 137.783 | 4.119            | SICDIT   | 137.615 | 4.095            |
| BUZGUZ   | 137.952 | 4.135            | FAHNIN   | 137.783 | 4.2              | JIWPAJ   | 137.614 | 4.031            |
| RERKUW   | 137.947 | 4.291            | COQGAS   | 137.772 | 3.381            | COTJUT   | 137.612 | 4.074            |
| YUVWOB   | 137.946 | 4.325            | QUFFED   | 137.772 | 3.525            | XUYXEV   | 137.605 | 4.158            |
| FOTBUO   | 137.939 | 3.961            | ICUNUS   | 137.771 | 4.283            | BAMWOD   | 137.597 | 4.32             |
| ROGMEG   | 137.938 | 3.422            | NOFLUR   | 137.771 | 4.033            | UYAJIO   | 137.597 | 3.87             |
| SOCNAB   | 137.937 | 4.074            | ZZZDVY04 | 137.767 | 4.082            | MUNKIR   | 137.596 | 4.234            |
| MUDFEW   | 137.937 | 3.961            | KAYHAT01 | 137.765 | 4.376            | KUHCIC   | 137.595 | 4.286            |
| JIWNUB   | 137.937 | 4.287            | KEDRAO   | 137.764 | 3.956            | UKIMEI   | 137.59  | 4.057            |
| QAKFOA   | 137.936 | 4.274            | PIKYOY   | 137.762 | 3.99             | CIVBAL   | 137.577 | 4.338            |
| LOQFEE   | 137.932 | 4.007            | EGIHOR   | 137.758 | 4.28             | YEJBAS   | 137.57  | 4.058            |
| SOVTOO   | 137.916 | 4.163            | QIBNOE   | 137.755 | 3.798            | TOMKEN   | 137.562 | 3.968            |
| SOVTOO01 | 137.916 | 4.163            | PAHTIE   | 137.751 | 3.784            | TUFJAG   | 137.561 | 3.976            |
| CEYGIY   | 137.916 | 3.765            | BUZGUZ   | 137.748 | 4.115            | JUKHAA   | 137.544 | 4.286            |
| RUKZEE   | 137.905 | 4.056            | NABMAF   | 137.744 | 4.128            | MULKUZ   | 137.542 | 4.053            |
| FONPUV   | 137.894 | 3.82             | WUYHUU   | 137.744 | 4.377            | TIRTAQ   | 137.527 | 4.184            |
| SIHJEZ   | 137.894 | 4.134            | RIPLEJ   | 137.743 | 4.195            | HIQVUZ   | 137.524 | 3.93             |
| NEYTUJ   | 137.893 | 4.251            | YIZCUH   | 137.741 | 4.391            | EBEZOE   | 137.521 | 4.161            |
| YEJBAS   | 137.889 | 4.206            | CANLEJ   | 137.735 | 4.222            | FEBYIW   | 137.518 | 3.663            |
| XANMUV   | 137.883 | 3.844            | RUZQOS   | 137.716 | 3.982            | XIXNUO   | 137.515 | 3.918            |
| MUVVUW   | 137.88  | 3.557            | PIJBAM   | 137.716 | 4.248            | BIZFUL   | 137.513 | 4.29             |
| XUXPAI   | 137.878 | 4.265            | SOWCOY   | 137.713 | 3.32             | MOKTOW   | 137.505 | 4.191            |
| QUGWOF   | 137.872 | 3.924            | IJIVIH   | 137.713 | 4.228            | CEMPUJ   | 137.504 | 3.764            |
| OKIJEI   | 137.868 | 4.014            | SOCSEI   | 137.711 | 4.201            | NEYVIZ   | 137.503 | 4.289            |
| NUFBIB   | 137.868 | 3.646            | HOJCOY   | 137.71  | 4.07             | ADUKES   | 137.501 | 3.76             |
| VIRLAK   | 137.867 | 3.314            | KARDEO   | 137.703 | 4.267            | HOJJIC   | 137.491 | 4.401            |
| VEHMUS   | 137.862 | 3.801            | VOWXIO   | 137.701 | 3.497            | RAMHOC   | 137.491 | 4.159            |
| NEBNOZ   | 137.861 | 4.187            | QUSVIJ   | 137.7   | 4.141            | XEHTUA   | 137.487 | 3.846            |
| ZUSJII   | 137.859 | 4.324            | FOZJAI   | 137.695 | 4.375            | OKIJEI   | 137.48  | 4.007            |
| SOXTUW   | 137.858 | 4.192            | BEVZUZ   | 137.691 | 4.02             | DOZFOO   | 137.478 | 4.311            |
| WENDEA   | 137.464 | 4.319            | NEYWEW   | 137.255 | 4.317            | XAGQAZ01 | 137.034 | 3.885            |
| AHOMUH   | 137.46  | 3.948            | IWORET   | 137.246 | 4.083            | KIRMOR   | 137.025 | 4.336            |
| EBUBOV01 | 137.459 | 4.229            | YEPKUC   | 137.243 | 3.928            | QANZEL   | 137.021 | 4.011            |
| IQUMIQ   | 137.444 | 3.859            | LESFAT   | 137.238 | 4.018            | RAFWUS   | 137.02  | 3.975            |
| AYISEH01 | 137.428 | 3.979            | KIKZAG   | 137.235 | 4.388            | AWIGAQ   | 137.018 | 3.93             |
| BIZFUL   | 137.418 | 4.29             | ICUNUS   | 137.222 | 4.104            | INAKOZ   | 137.017 | 4.378            |
| KICVAU   | 137.416 | 3.962            | QUJZAZ   | 137.207 | 4.035            | ODUSEL   | 137.009 | 4.256            |
| GICTAN   | 137.404 | 4.277            | TOBPOS   | 137.207 | 4.092            | KAQTAA   | 137.007 | 4.141            |
| CEBCUJ   | 137.403 | 3.98             | SAEDZN10 | 137.203 | 3.375            | OZUNEF   | 137.005 | 4.041            |
| BAZSII   | 137.393 | 3.754            | IJEDIL   | 137.189 | 4.089            | NARKEA   | 136.998 | 4.227            |
| IGAQIQ   | 137.39  | 3.873            | HAHCIF   | 137.187 | 4.059            | TAPRAG   | 136.988 | 3.991            |
| GIQFOF   | 137.39  | 3.967            | TEFQOK   | 137.184 | 4.124            | GIQYOY   | 136.987 | 4.177            |
| SOCGOJ   | 137.384 | 3.386            | JIWNIP   | 137.181 | 4.159            | NUDNIL   | 136.987 | 3.852            |
| KEBGIK   | 137.378 | 3.784            | HIQREF   | 137.178 | 4.209            | KUBSIK   | 136.978 | 3.966            |
| ZAWTOI   | 137.378 | 3.246            | GICMAI   | 137.178 | 4.258            | YIZCUH   | 136.977 | 4.283            |
| IJIVIH   | 137.37  | 4.286            | KIKZAG   | 137.176 | 4.375            | ODUSEL   | 136.974 | 4.22             |
| MAKSUN   | 137.365 | 3.655            | CUHKUN   | 137.176 | 3.901            | VIBJIA   | 136.972 | 4.166            |
| GOTLIM   | 137.364 | 4.1              | NEYVOF   | 137.175 | 4.266            | ULEXER   | 136.963 | 4.196            |
| XAXZIG   | 137.364 | 3.982            | RAFWUS   | 137.173 | 3.92             | LERVOV   | 136.962 | 4.117            |
| YELFED   | 137.364 | 4.389            | ETAXON   | 137.172 | 4.274            | IJEDOR   | 136.961 | 3.986            |
| EQERUP   | 137.363 | 4.177            | MUVVUW   | 137.171 | 3.484            | USASEP   | 136.953 | 3.866            |
| GOBHUC   | 137.36  | 4.278            | TUFJAG   | 137.17  | 4.308            | RAMHOC01 | 136.944 | 4.135            |
| MULKUZ   | 137.352 | 3.929            | NAKPUM   | 137.161 | 3.759            | RUWMED   | 136.94  | 4.362            |
| OBUNEI   | 137.35  | 3.804            | ECUGOA   | 137.152 | 4.27             | LICXED   | 136.93  | 4.29             |
| ICUBUE   | 137.347 | 3.571            | GAKQIV   | 137.146 | 3.781            | YIKGIL   | 136.928 | 3.728            |
| RECKOD   | 137.344 | 3.762            | LIGVAY   | 137.141 | 3.811            | CAZFES   | 136.919 | 4.333            |
| SIJLIH   | 137.341 | 3.892            | COSBIW   | 137.136 | 4.185            | IXACUF   | 136.901 | 4.116            |
| FERFIU   | 137.34  | 4.377            | JUFHAV   | 137.13  | 4.121            | DUNXUH08 | 136.898 | 3.203            |

| Refcodes | ∠YZnO   | d <sub>ZnO</sub> | Refcodes | ∠YZnO   | d <sub>ZnO</sub> | Refcodes | ∠YZnO   | d <sub>ZnO</sub> |
|----------|---------|------------------|----------|---------|------------------|----------|---------|------------------|
| CACKEA   | 137.335 | 3.993            | MAZVAK   | 137.128 | 3.886            | DUNXUH21 | 136.896 | 3.203            |
| ADUJUH   | 137.333 | 3.753            | UHUVID   | 137.122 | 3.997            | ULOZIH   | 136.887 | 4.167            |
| NOXBK    | 137.332 | 4.072            | DUZQOG   | 137.115 | 4.268            | KIZGIL   | 136.883 | 4.335            |
| HIQVUZ   | 137.329 | 3.909            | TATPUC   | 137.112 | 3.747            | KAWHOG   | 136.882 | 4.363            |
| XIBGOI   | 137.326 | 4.098            | TUMDAI   | 137.106 | 4.047            | WUPTAE   | 136.881 | 4.327            |
| FASWED01 | 137.326 | 4.276            | BASZUU   | 137.1   | 4.052            | ELESIA   | 136.881 | 4.033            |
| FUJNAB   | 137.322 | 4.395            | ZIWLAS   | 137.096 | 4.124            | GETNUS   | 136.876 | 4.205            |
| ARAZAX   | 137.318 | 3.56             | TAPQUZ   | 137.088 | 3.991            | ILUSIS   | 136.867 | 4.239            |
| IJEDIL   | 137.314 | 4.112            | QENFAR   | 137.082 | 3.973            | LUMCED   | 136.863 | 4.004            |
| JISJUT   | 137.313 | 3.848            | QIDRAA   | 137.073 | 3.94             | NAHHIP   | 136.854 | 4.25             |
| PIJKAV   | 137.313 | 3.802            | SENJEB   | 137.072 | 4.183            | RUWMED   | 136.852 | 4.083            |
| QQQAZD01 | 137.287 | 3.533            | QOMFEF   | 137.065 | 4.089            | KAYPUW   | 136.847 | 3.855            |
| QANZEL   | 137.282 | 4.346            | WENPIO   | 137.058 | 3.957            | ZUGVEC   | 136.847 | 4.176            |
| EVAVAY   | 137.281 | 4.082            | HIYNIN   | 137.057 | 4.104            | ONIWAK   | 136.846 | 4.287            |
| KAQGIV   | 137.28  | 3.914            | ITELIE   | 137.056 | 3.68             | UKEZIV   | 136.841 | 3.934            |
| SAHFEN   | 137.277 | 4.157            | CEBCUJ   | 137.054 | 4.3              | WIRCUX   | 136.839 | 3.967            |
| YEMDIG   | 137.275 | 3.329            | JIWNOV   | 137.052 | 4.167            | ASUBIZ   | 136.838 | 4.017            |
| FOWQEQ   | 137.274 | 4.264            | DUFJUM   | 137.05  | 3.942            | FUJNEF   | 136.835 | 4.247            |
| ZUJZUB   | 137.265 | 3.995            | MUVVUW   | 137.045 | 3.609            | MUDFEW   | 136.82  | 4.001            |
| MAZLOO   | 137.262 | 4.041            | WIJDAV   | 137.045 | 3.994            | EYEDIY   | 136.811 | 4.162            |
| GINFAM   | 137.256 | 4.123            | POMRIT   | 137.037 | 4.15             | PAFWEY   | 136.801 | 4.276            |
| PAFWEY10 | 136.801 | 4.276            | TEDLUK   | 136.54  | 3.349            | TICDAM   | 136.289 | 3.752            |
| GEHYEB   | 136.8   | 3.976            | VUPQON   | 136.526 | 4.061            | MUVVUW   | 136.262 | 3.53             |
| VIRNUG01 | 136.797 | 3.582            | OMIDAQ   | 136.524 | 4.407            | COKCEN   | 136.254 | 4.008            |
| ELESIA   | 136.794 | 3.996            | PIKYEQ   | 136.497 | 3.173            | WOLKUF   | 136.253 | 4.183            |
| VIRNUG   | 136.789 | 3.597            | DUFMAU   | 136.497 | 3.825            | AXOCEW   | 136.25  | 3.153            |
| CUWNOA   | 136.778 | 3.306            | BIZFUL   | 136.496 | 3.994            | HUBMID   | 136.249 | 3.846            |
| ADUKAO   | 136.778 | 3.757            | ARAFOQ   | 136.495 | 4.087            | RAXNAH   | 136.246 | 3.931            |
| NEYWAS   | 136.776 | 4.318            | NOXBK    | 136.488 | 4.116            | DIPCAJ   | 136.238 | 4.182            |
| PUMGOV   | 136.772 | 4.176            | ZUTNUZ   | 136.486 | 3.77             | SARCIA   | 136.231 | 3.973            |
| ILIZOT   | 136.771 | 4.409            | KEPGOF   | 136.486 | 4.05             | TAPRIO   | 136.227 | 4.218            |
| NAMCUA   | 136.768 | 4.315            | NABMAF   | 136.47  | 3.61             | ADEKEB   | 136.224 | 4.176            |
| TUWPAF   | 136.766 | 3.925            | JIVDUR   | 136.464 | 4.274            | DOTHEB   | 136.221 | 4.084            |
| DEZXUE   | 136.762 | 3.998            | DUDLOF   | 136.459 | 3.838            | OFOPOP   | 136.22  | 4.22             |
| NEYVUL   | 136.758 | 4.278            | DIPCUD   | 136.453 | 4.218            | KEYPAG   | 136.216 | 3.907            |
| TOBRIO   | 136.754 | 4.112            | DAWQIE   | 136.447 | 3.979            | NAKPUM   | 136.215 | 4.314            |
| XOMHIQ   | 136.751 | 4.231            | HAHCIF   | 136.445 | 3.914            | DUCKAQ   | 136.205 | 3.945            |
| SENJEB   | 136.748 | 4.362            | NISBIC   | 136.424 | 3.105            | EBUBOV   | 136.2   | 4.222            |
| NAKPUM   | 136.747 | 3.996            | DOVHEB   | 136.418 | 3.857            | ZINDAD   | 136.192 | 3.959            |
| NEPPAZ   | 136.741 | 4.165            | RIRWIB   | 136.417 | 4.335            | DIPCOX   | 136.192 | 4.197            |
| LUMCIH   | 136.729 | 4.004            | KAYPUW   | 136.411 | 3.934            | DILBIK   | 136.188 | 4.01             |
| VENMIL   | 136.717 | 4.008            | MURQIA   | 136.404 | 3.938            | GUQTOB   | 136.183 | 4.375            |
| ALUXEM   | 136.716 | 3.584            | PUMGOV   | 136.399 | 4.172            | UKIMEI   | 136.18  | 3.968            |
| REHGAN01 | 136.711 | 4.135            | BIZFUL   | 136.397 | 3.998            | XIXPIE   | 136.18  | 3.929            |
| GETNUS01 | 136.711 | 4.196            | AZIRUW   | 136.392 | 4.183            | HOZRUM   | 136.178 | 4.156            |
| CEXTAB   | 136.709 | 3.929            | RAJHIU   | 136.386 | 4.379            | ETIXAI   | 136.167 | 4.407            |
| MOJKAY   | 136.698 | 3.975            | YUXWEV   | 136.384 | 4.287            | JICNIS   | 136.156 | 4.139            |
| SUPLAR   | 136.695 | 3.977            | POGMIK   | 136.381 | 3.825            | PUNQIZ   | 136.153 | 4.198            |
| PAHQAU   | 136.695 | 4.048            | EQERUP   | 136.375 | 4.272            | OYAPOV   | 136.153 | 4.139            |
| GIKQEA   | 136.691 | 4.269            | WARCOJ   | 136.375 | 4.296            | MIKYUE   | 136.142 | 4.076            |
| ZZZDVY02 | 136.678 | 4.098            | JEMXUX   | 136.364 | 4.278            | TIHNON   | 136.137 | 4.039            |
| EWESAD   | 136.666 | 4.284            | QUWHOG   | 136.36  | 4.282            | GETPEE   | 136.137 | 4.317            |
| JOHLUQ   | 136.663 | 3.772            | SOMKUC   | 136.358 | 3.983            | YOQYUZ   | 136.132 | 4.291            |
| XAGQAZ   | 136.653 | 3.872            | CESQUP   | 136.358 | 3.236            | SISFOR   | 136.131 | 4.012            |
| ZUJZUB   | 136.639 | 3.894            | REHGAN01 | 136.355 | 4.058            | MUZVOS   | 136.123 | 4.363            |
| SEYLEQ   | 136.635 | 3.997            | XEHYAM   | 136.348 | 3.916            | REHGAN   | 136.116 | 4.058            |
| UGOQIS   | 136.629 | 3.826            | COCQAP   | 136.347 | 4.162            | XIDNOP   | 136.113 | 4.107            |
| XOZKAY   | 136.617 | 3.704            | NEJGER   | 136.347 | 4.056            | SULKEQ   | 136.112 | 4.142            |
| JEMYAE   | 136.6   | 4.273            | KIYFAC   | 136.344 | 4.05             | XIYFAM   | 136.11  | 4.126            |

| Refcodes | ∠YZnO   | d <sub>ZnO</sub> | Refcodes | ∠YZnO   | d <sub>ZnO</sub> | Refcodes | ∠YZnO   | d <sub>ZnO</sub> |
|----------|---------|------------------|----------|---------|------------------|----------|---------|------------------|
| BOVLAA   | 136.598 | 3.95             | GANGOS   | 136.338 | 3.799            | XIYFAM01 | 136.107 | 4.136            |
| QEDTUR   | 136.592 | 4.316            | UGUQUJ   | 136.333 | 4.209            | RILWOA   | 136.107 | 3.977            |
| RUWMON   | 136.59  | 4.03             | VIFFUM   | 136.331 | 3.873            | BINBAE   | 136.1   | 4.316            |
| LIQDOH   | 136.589 | 3.972            | YUQQEI   | 136.331 | 3.392            | WIHMIK   | 136.093 | 3.815            |
| RAFWUS   | 136.589 | 4.383            | NAWTEO   | 136.329 | 4.059            | DUNXUH15 | 136.084 | 3.199            |
| NABROY01 | 136.584 | 3.869            | QAKFOA   | 136.325 | 4.355            | ZZZDVY03 | 136.082 | 4.148            |
| REHGAN   | 136.579 | 4.137            | JITNEJ   | 136.321 | 4.254            | GETZAH   | 136.07  | 4.035            |
| FAXPOM   | 136.576 | 3.975            | CUHKUN   | 136.32  | 4.239            | LAXDOG   | 136.067 | 3.995            |
| FAXQUT   | 136.552 | 4.199            | TOLMUF   | 136.313 | 3.878            | QIBNOE02 | 136.062 | 3.963            |
| HOPTUC   | 136.549 | 4.2              | ALUXEM   | 136.303 | 3.59             | MAHTAS   | 136.061 | 4.23             |
| LUZDOB   | 136.543 | 4.224            | KIPSOV   | 136.302 | 4.266            | PEWFUT   | 136.06  | 4.199            |
| EFIXUO   | 136.055 | 3.856            | YIZCUH   | 135.809 | 4.253            | OFUNOW   | 135.567 | 3.447            |
| LOZQEY   | 136.054 | 3.585            | WEMWAP   | 135.805 | 3.546            | GIZGAA   | 135.566 | 4.094            |
| TIHNON   | 136.053 | 4.146            | SOXTUW   | 135.805 | 4.074            | ETIPII   | 135.564 | 4.036            |
| PIBCEL   | 136.053 | 3.932            | LEKNUN   | 135.802 | 3.236            | LACQIS   | 135.558 | 4.375            |
| FONPUV   | 136.049 | 4.117            | VIRLAK   | 135.802 | 3.557            | LAWHAV   | 135.554 | 3.291            |
| QIBNOE01 | 136.043 | 3.965            | POCQUU   | 135.794 | 4.353            | CAPWAU   | 135.55  | 3.638            |
| VONMIU   | 136.039 | 4.16             | RICKIA   | 135.789 | 4.013            | VOQDEL01 | 135.546 | 3.996            |
| QUKRAS   | 136.037 | 3.927            | YEQRIZ   | 135.781 | 4.076            | CAPWAU   | 135.544 | 3.622            |
| FEBFIC   | 136.023 | 4.025            | RAXJIL   | 135.779 | 4.06             | EBIKAB   | 135.543 | 4.136            |
| OPOLUC   | 136.022 | 4.245            | CODVAV   | 135.777 | 4.056            | ZZZDVY04 | 135.54  | 4.126            |
| FIKNIX   | 136.02  | 3.82             | SEGDIT   | 135.768 | 3.879            | EGUQOO   | 135.536 | 4.209            |
| KILYAJ   | 136.017 | 3.862            | OCADAY   | 135.756 | 4.264            | NAKPUM   | 135.533 | 4.387            |
| KERGOE   | 136.01  | 4.04             | VIXVIJ   | 135.752 | 4.005            | TAMZEQ   | 135.53  | 3.851            |
| ONIWAK   | 135.999 | 4.056            | CEPBOR   | 135.739 | 4.09             | FOYMUE   | 135.514 | 4.014            |
| BUYBAZ   | 135.997 | 3.778            | EWEDOA   | 135.739 | 4.054            | LEZVIW   | 135.499 | 3.966            |
| PIPKIK   | 135.997 | 4.082            | DOQJUQ   | 135.739 | 3.999            | GAKTIW   | 135.494 | 3.897            |
| TAPREK   | 135.996 | 4.225            | IKEYAA   | 135.729 | 4.162            | DOMYUC01 | 135.493 | 4.038            |
| QIBNOE   | 135.994 | 3.956            | ZAQXEX   | 135.726 | 4.333            | MULKUZ   | 135.487 | 3.977            |
| AFUWEG   | 135.99  | 3.885            | FIPRUR   | 135.722 | 4.06             | ARIFIQ   | 135.479 | 3.825            |
| XOLCEH   | 135.976 | 4.345            | COCQET   | 135.721 | 4.186            | PUWKUP   | 135.471 | 4.261            |
| DAGYAM   | 135.969 | 3.896            | GUNGUU   | 135.719 | 3.967            | DAGXOZ   | 135.471 | 4.11             |
| PESYIV   | 135.967 | 4.016            | GICTAQ   | 135.712 | 4.041            | WIHMIK   | 135.466 | 4.065            |
| BINBAE   | 135.967 | 4.339            | QETFIF   | 135.705 | 4.394            | VUQXUD   | 135.437 | 4.048            |
| TAYBII   | 135.966 | 3.9              | SITCIH   | 135.702 | 3.993            | IHIVAZ   | 135.432 | 3.918            |
| ZOCFAB   | 135.955 | 3.844            | GICFIK   | 135.7   | 4.096            | YODYUO   | 135.429 | 3.84             |
| QUXVUB   | 135.955 | 3.869            | QISFIL   | 135.686 | 4.112            | PEGBEL   | 135.414 | 3.509            |
| NICCIN   | 135.952 | 4.178            | WIYCAL   | 135.685 | 4.177            | IGUDUK   | 135.402 | 3.817            |
| IZAZAL   | 135.948 | 4.302            | ASIZAG   | 135.673 | 4.046            | EYEDIY   | 135.396 | 3.847            |
| QIDQUT   | 135.944 | 3.874            | YAXNIX   | 135.673 | 4.034            | FIHYOM   | 135.383 | 4.235            |
| LISXEU   | 135.928 | 4.18             | RAMSAC   | 135.669 | 4.362            | CAHJII   | 135.375 | 3.94             |
| LULWUM   | 135.923 | 4.235            | XAVKEN   | 135.664 | 4.083            | NABMAF   | 135.368 | 3.694            |
| XIXPIE   | 135.911 | 3.847            | VIBJEW   | 135.662 | 4.388            | FASWED   | 135.366 | 4.186            |
| LIDWAA   | 135.905 | 3.973            | MIHNOH   | 135.641 | 4.148            | HIQVUZ   | 135.353 | 4.285            |
| GOTLIM   | 135.899 | 4.27             | DUDQUR   | 135.632 | 4.273            | MOHLEB   | 135.343 | 3.278            |
| ESAVEB   | 135.897 | 3.847            | KEPGOF   | 135.626 | 3.994            | SOPWIF   | 135.339 | 4.371            |
| ZEJSUF   | 135.878 | 3.718            | PIPKEG   | 135.619 | 4.123            | DOMYUC02 | 135.329 | 4.034            |
| GIQGAS   | 135.877 | 4.066            | JAJPIU   | 135.617 | 4.23             | QIDRII   | 135.326 | 3.972            |
| UZIDAJ   | 135.875 | 4.246            | DAWQIE   | 135.61  | 4.384            | OTOZOO   | 135.325 | 3.4              |
| XIFWAM   | 135.875 | 3.997            | XANVIR   | 135.61  | 3.938            | QIDREE   | 135.323 | 3.986            |
| QALHET   | 135.875 | 4.299            | XUYVAS   | 135.599 | 3.356            | MIKKAV   | 135.32  | 4.13             |
| MEWWET   | 135.874 | 4.253            | PIHNIE   | 135.593 | 4.043            | KUBVIO   | 135.318 | 4.076            |
| GICTEU   | 135.874 | 4.133            | CAPWAU   | 135.592 | 3.881            | WONXED   | 135.317 | 4.252            |
| VUQXUD   | 135.873 | 4.113            | SECXUU   | 135.59  | 3.96             | WUPTEI   | 135.315 | 4.076            |
| GUFQEE   | 135.861 | 4.099            | KEYLEG   | 135.587 | 3.596            | KAMLER   | 135.312 | 4.266            |
| XIXPEA   | 135.858 | 3.892            | GUNGUU   | 135.583 | 3.63             | NAMCUA   | 135.31  | 4.06             |
| AGOHIP   | 135.851 | 4.309            | TEFPIG   | 135.576 | 4.252            | VIVDUB   | 135.305 | 3.155            |
| TOJBIF   | 135.848 | 4.143            | DAZCOX   | 135.572 | 3.865            | PUXNEB01 | 135.302 | 4.059            |
| KILXUC   | 135.837 | 3.839            | JAHZOI   | 135.572 | 4.307            | GAKTIW01 | 135.288 | 3.899            |

| Refcodes | ∠YZnO   | d <sub>ZnO</sub> | Refcodes | ∠YZnO   | d <sub>ZnO</sub> | Refcodes | ∠YZnO   | d <sub>ZnO</sub> |
|----------|---------|------------------|----------|---------|------------------|----------|---------|------------------|
| NEQDIW   | 135.827 | 4.247            | ERIRAZ   | 135.568 | 4.063            | UMAWOV   | 135.287 | 3.745            |
| BOFGEL   | 135.285 | 3.859            | BUYBED   | 135.004 | 3.914            | NAZZOG01 | 134.736 | 3.962            |
| SOKROC   | 135.284 | 4.23             | EVEJEW   | 135.001 | 3.998            | KOQXAR01 | 134.724 | 3.899            |
| YOVCAP   | 135.277 | 4.122            | DEFGEC   | 134.999 | 3.984            | WUPZOY   | 134.722 | 4.398            |
| HOTFED   | 135.271 | 3.812            | QAKFOA   | 134.997 | 4.203            | GAPDAE   | 134.711 | 4.072            |
| ATOWUE   | 135.265 | 4.033            | EREQUP   | 134.997 | 4.384            | COFCIL   | 134.707 | 4.205            |
| DAGYAM   | 135.259 | 3.844            | DUNXUH06 | 134.983 | 3.203            | YUPKAW   | 134.705 | 3.834            |
| SENJEB   | 135.253 | 3.862            | HIHBUX   | 134.976 | 4.052            | RUZQIM   | 134.697 | 4.214            |
| DUNXUH   | 135.251 | 3.201            | DAXGOA   | 134.972 | 4.224            | LIQDOH   | 134.697 | 4.224            |
| JIWPAJ   | 135.248 | 3.778            | VIGFAW   | 134.972 | 4.01             | OXIXEA   | 134.697 | 4.176            |
| PIKYOY   | 135.247 | 3.611            | VIYQAX   | 134.971 | 4.312            | CAPWAU   | 134.686 | 4.027            |
| PUXNEB   | 135.247 | 4.066            | GAPDAE   | 134.965 | 4.239            | AGAWUA   | 134.684 | 4.007            |
| LACGAA01 | 135.247 | 4.034            | SAEDZN11 | 134.965 | 4.012            | PUNQIZ   | 134.67  | 4.121            |
| YILXAT   | 135.237 | 4.183            | NAZZOG   | 134.956 | 3.944            | ZUGVEC   | 134.667 | 3.971            |
| EVUSAQ   | 135.233 | 4.14             | RUNSOI   | 134.954 | 3.824            | KAKFEL   | 134.659 | 4.149            |
| VAJMAV   | 135.223 | 4.197            | LIDWAA   | 134.952 | 4.087            | YEXJOB   | 134.656 | 4.11             |
| TUKFAI   | 135.222 | 3.753            | AMETOB   | 134.946 | 3.968            | LIDWAA   | 134.653 | 4.225            |
| ABOLAG   | 135.214 | 4.267            | EQUNUA   | 134.944 | 3.993            | LIWXEV   | 134.649 | 3.71             |
| QUGWOF   | 135.213 | 4.128            | ETIPII   | 134.933 | 4.256            | TAYBII   | 134.629 | 3.645            |
| VOJMEP   | 135.206 | 4.242            | AFEJAX   | 134.927 | 3.968            | TUKFIQ   | 134.628 | 3.764            |
| LISZEU   | 135.205 | 4.025            | XUGDEK   | 134.924 | 4.328            | ENEYEE   | 134.626 | 3.938            |
| UVUWAL   | 135.202 | 4.236            | JABKAY   | 134.914 | 3.923            | GIDCUT   | 134.626 | 3.702            |
| WIRHUD   | 135.195 | 4.278            | MAKSOI   | 134.896 | 3.492            | PIPKAC   | 134.621 | 4.122            |
| KALJEN   | 135.187 | 4.02             | NAZZOG   | 134.895 | 3.936            | RICKIA   | 134.619 | 4.199            |
| PETFON   | 135.183 | 3.857            | MONDUQ   | 134.895 | 4.135            | KEYQAJ   | 134.607 | 4.261            |
| FIKNIX   | 135.175 | 4.271            | IFIZOM   | 134.892 | 4.336            | IDOHES   | 134.598 | 4.105            |
| RECKIX   | 135.172 | 4.093            | CILDOR01 | 134.89  | 3.783            | TUKDUA   | 134.598 | 3.751            |
| BASZUU   | 135.163 | 4.11             | UGUZEC   | 134.881 | 4.332            | BOFGEL   | 134.596 | 3.974            |
| XIFYET   | 135.151 | 4.094            | UTATOZ   | 134.879 | 3.905            | ZACKAP   | 134.593 | 4.102            |
| YOCKUW   | 135.149 | 4.067            | JIWNUB   | 134.87  | 3.898            | RAXSIU   | 134.591 | 3.829            |
| SEPMOS   | 135.144 | 4.355            | GENZAD   | 134.863 | 4.327            | VAXVOJ   | 134.588 | 4.122            |
| IZIPAI   | 135.142 | 3.876            | VEGSEJ   | 134.861 | 3.836            | YIJDAY   | 134.586 | 3.687            |
| TUJVUS   | 135.141 | 4.081            | LOQFEE   | 134.858 | 3.941            | RIDWUX   | 134.586 | 4.15             |
| KEPGOF   | 135.135 | 3.583            | DORFUN   | 134.854 | 4.147            | FIDFUU   | 134.583 | 4.014            |
| FOZJAI   | 135.132 | 4.171            | PIPKEG   | 134.847 | 4.132            | TAVSUH   | 134.581 | 4.094            |
| DEFGAY   | 135.124 | 3.988            | CILDOR   | 134.835 | 3.792            | EYERAB   | 134.578 | 4.368            |
| NEPLIE   | 135.109 | 4.04             | NOXBK    | 134.835 | 4.335            | WECHOD   | 134.577 | 4.007            |
| NAZZOG01 | 135.075 | 3.95             | UZOCUK   | 134.833 | 3.462            | XOLQIY   | 134.574 | 4.364            |
| HETWAF   | 135.071 | 4.11             | YAPNEM   | 134.829 | 4.319            | CUBWIG   | 134.571 | 4.005            |
| MOHRAD   | 135.065 | 3.955            | QUBLAB   | 134.824 | 3.936            | FEDYEU   | 134.563 | 3.915            |
| HIBHEJ   | 135.063 | 3.953            | DEFGIG   | 134.819 | 3.99             | VAJHIA   | 134.557 | 4.096            |
| ESOYUG   | 135.057 | 4.107            | VIQMEO   | 134.816 | 3.865            | KEYQAJ01 | 134.557 | 4.265            |
| CAPWAU   | 135.048 | 3.977            | NAQLAT   | 134.804 | 4.045            | UJAZAG   | 134.553 | 4.038            |
| PIDMEV   | 135.048 | 4.085            | NEKWAB   | 134.797 | 4.332            | TISBIG   | 134.551 | 4.061            |
| TOMKEN   | 135.04  | 4.246            | RUWMED   | 134.788 | 4.103            | VARZEV   | 134.543 | 4.076            |
| FOCLUH   | 135.038 | 3.59             | REFLEV   | 134.757 | 4.014            | TEGQEF   | 134.534 | 4.3              |
| OGIBEM   | 135.027 | 4.11             | PEGBEL   | 134.75  | 3.357            | SEZMIW   | 134.531 | 4.094            |
| YEMDIG   | 135.023 | 4.085            | AGOTAS   | 134.746 | 3.935            | SUPGAO   | 134.519 | 3.99             |
| MEXRIT   | 135.015 | 4.076            | UREPAL   | 134.744 | 4.23             | RAVGAY   | 134.511 | 4.032            |
| RAMRUV   | 135.004 | 4.335            | LICXAZ   | 134.737 | 4.304            | NEPLIE   | 134.51  | 4.019            |
| XEGTEM   | 134.479 | 4.019            | HIQVUZ   | 134.235 | 3.96             | SIQZOL   | 133.986 | 4.351            |
| ROCWAH   | 134.473 | 4.233            | FIPRUR   | 134.235 | 4.149            | DUDKOE   | 133.986 | 4.213            |
| TEDFOY   | 134.473 | 4.229            | QUXVUB   | 134.221 | 3.971            | MOJKAY   | 133.974 | 3.937            |
| YUPKAW   | 134.473 | 4.136            | DEFGEC   | 134.22  | 3.964            | TEDSAX   | 133.962 | 4.086            |
| XIYGAN   | 134.47  | 4.346            | NENXUC   | 134.214 | 3.694            | LESGIC   | 133.958 | 3.811            |
| YOCKUW   | 134.47  | 4.069            | LAGROC   | 134.209 | 4.047            | SIXJER   | 133.954 | 4.243            |
| NIQSUD   | 134.439 | 3.726            | COFCIL   | 134.207 | 4.025            | GEZXUH01 | 133.952 | 3.986            |
| POWDOV   | 134.431 | 4.305            | JOGBAK   | 134.206 | 4.205            | LARGIX   | 133.951 | 4.288            |
| TUJWED   | 134.43  | 4.197            | WUHLAO   | 134.205 | 3.999            | TUKDOU   | 133.95  | 3.758            |



| Refcodes | ∠YZnO   | d <sub>ZnO</sub> | Refcodes | ∠YZnO   | d <sub>ZnO</sub> | Refcodes | ∠YZnO   | d <sub>ZnO</sub> |
|----------|---------|------------------|----------|---------|------------------|----------|---------|------------------|
| YEQSOF   | 134.429 | 4.388            | GECXUH   | 134.201 | 3.988            | DISSOR   | 133.941 | 4.146            |
| PUPMOD   | 134.415 | 3.684            | XINQAQ   | 134.199 | 3.57             | XOZJOL   | 133.938 | 3.962            |
| EMOQIH   | 134.413 | 3.876            | WIYFES   | 134.194 | 3.808            | JIWNIP   | 133.937 | 4.131            |
| YUBJEN   | 134.408 | 4.258            | KEHNIW   | 134.191 | 4.261            | OYEXOI   | 133.934 | 4.328            |
| QOMFEF   | 134.406 | 4.104            | JAHNUE   | 134.19  | 4.118            | GUPBOK   | 133.933 | 3.899            |
| LABQIQ   | 134.406 | 4.058            | KIZGIL   | 134.19  | 4.351            | GABWEN   | 133.93  | 4.107            |
| JOFDUG   | 134.404 | 4.244            | QAYNAF   | 134.183 | 4.405            | SENJEB   | 133.93  | 3.767            |
| IGAVAN01 | 134.401 | 3.911            | UVIKES   | 134.18  | 3.928            | ROQKIT   | 133.927 | 3.966            |
| PERBOF   | 134.401 | 4.194            | UNIQEO   | 134.171 | 3.264            | GECXUH03 | 133.919 | 3.994            |
| NOHDOG   | 134.398 | 3.523            | COFCIL   | 134.17  | 4.214            | VUYBEX   | 133.911 | 4.087            |
| DACBOB   | 134.391 | 4.102            | JEFBUV   | 134.159 | 3.909            | HOKWAF   | 133.907 | 3.95             |
| TAYBII   | 134.379 | 3.769            | QORKOX   | 134.153 | 3.629            | GICLUB   | 133.906 | 3.892            |
| IWOQEQ   | 134.379 | 4.288            | ZUGVEC   | 134.149 | 3.936            | HAZYUE   | 133.897 | 3.64             |
| XEHTUA   | 134.378 | 3.884            | LEJQAV   | 134.145 | 3.954            | HUXTUP   | 133.894 | 4.115            |
| MUZHAR   | 134.377 | 3.69             | RULDUX   | 134.13  | 4.382            | OYOWEH   | 133.883 | 4.278            |
| KALJEN   | 134.37  | 4.139            | SIRFUJ   | 134.128 | 4.015            | ZZZDVY03 | 133.871 | 4.079            |
| ABOWOF   | 134.367 | 4.071            | GESPEC   | 134.128 | 3.675            | UJAPOL   | 133.864 | 4.372            |
| KOQXAR   | 134.367 | 3.884            | GUWXIG   | 134.127 | 3.602            | WUPTIE   | 133.857 | 4.351            |
| GICLUB   | 134.353 | 4.075            | RIDWUX   | 134.127 | 4.043            | DUNXUH14 | 133.855 | 3.201            |
| XAVKEN   | 134.339 | 4.069            | CIBYAO   | 134.126 | 3.438            | ROPGIO   | 133.853 | 4.09             |
| WUVZIZ   | 134.336 | 4.208            | IGAVAN   | 134.125 | 3.96             | MPZHZN   | 133.851 | 3.963            |
| DEZXIS   | 134.329 | 4.016            | AJOVUS   | 134.107 | 4.148            | GEYRIO   | 133.85  | 3.758            |
| SUPGAO01 | 134.319 | 3.986            | ASEROI   | 134.102 | 4.094            | QARVIP   | 133.843 | 4.271            |
| GAYZIP   | 134.317 | 4.038            | GECXUH02 | 134.102 | 3.954            | JIVDUR   | 133.839 | 4.183            |
| SAHFEN   | 134.303 | 4.236            | ESOUYU01 | 134.101 | 4.105            | MEHBIL   | 133.836 | 3.999            |
| FAKHOQ   | 134.302 | 4.299            | IVUTOJ   | 134.082 | 4.222            | FAHMIM   | 133.835 | 3.177            |
| HUPFAZ   | 134.299 | 3.899            | VIPKOW   | 134.076 | 4.137            | IREYOW   | 133.833 | 3.949            |
| AQUHIG   | 134.295 | 4.14             | NETVUF   | 134.072 | 3.82             | XOZJOL   | 133.833 | 3.705            |
| YUCBEE   | 134.29  | 4.133            | IGAVAN01 | 134.071 | 3.937            | FOCNET   | 133.823 | 4.097            |
| QOJYEV   | 134.283 | 3.93             | CUFNID   | 134.058 | 4.203            | AMERIT   | 133.821 | 3.986            |
| JIWNOV   | 134.283 | 4.119            | LIZYUQ   | 134.049 | 4.056            | NEPPON   | 133.807 | 3.787            |
| JUZQAY   | 134.283 | 4.17             | GICTAN   | 134.043 | 3.977            | FASWED   | 133.797 | 4.138            |
| POLDOL   | 134.272 | 3.956            | XUNWIM   | 134.041 | 4.227            | BOQPIG   | 133.796 | 4.079            |
| AZAQOJ   | 134.269 | 3.745            | IREYOW   | 134.022 | 3.812            | RICNAU   | 133.792 | 3.457            |
| NAKPUM   | 134.267 | 4.149            | HOJJOI   | 134.015 | 4.377            | DEDNAF   | 133.787 | 4.328            |
| PAHPIB   | 134.266 | 3.954            | AXOCEW   | 134.01  | 3.229            | RAGXOO   | 133.777 | 3.922            |
| LUZDOB   | 134.262 | 3.743            | CAWLIY   | 134.009 | 4.337            | TAPHOJ   | 133.777 | 4.267            |
| WICJAT   | 134.257 | 4                | AWIGEJ   | 134.008 | 3.997            | NAZVOB   | 133.775 | 3.321            |
| MEXRIT   | 134.25  | 4.13             | NEYBID   | 134.002 | 4.049            | WEXHIS   | 133.77  | 3.98             |
| REVJUB   | 134.237 | 3.931            | GAYZIP01 | 133.987 | 4.061            | OKUXUQ   | 133.764 | 3.836            |
| ETANOD   | 133.761 | 3.441            | CEWCAJ   | 133.493 | 4.209            | DONPAY   | 133.217 | 3.798            |
| UMENOQ   | 133.753 | 4.047            | ZUGVEC   | 133.493 | 3.982            | AWIGIY   | 133.21  | 4.264            |
| DEBSUZ   | 133.727 | 4.205            | ZEBJUL   | 133.482 | 4.253            | VEGSAF   | 133.206 | 3.973            |
| UDOQAH   | 133.715 | 4.059            | AYISEH01 | 133.464 | 4.026            | GEYRIO   | 133.205 | 4.142            |
| LAYXAM   | 133.705 | 4.105            | AWIGUK   | 133.449 | 4.018            | KAPWUV   | 133.205 | 4.345            |
| ASIZAG   | 133.698 | 3.851            | IHIVAZ   | 133.447 | 3.973            | PEMPAZ   | 133.205 | 4.257            |
| ICUPUV   | 133.69  | 3.848            | GASRIE   | 133.447 | 4.1              | BEPLUF   | 133.186 | 3.453            |
| KICVAU   | 133.681 | 3.923            | JIWPAJ   | 133.443 | 4.207            | ZAXKOA   | 133.179 | 4.251            |
| YAFTOO   | 133.679 | 4.002            | GOSNAG   | 133.414 | 4.015            | YILBIG   | 133.178 | 3.344            |
| VEXTUP   | 133.666 | 4.083            | AMETOB   | 133.414 | 4.213            | VIZNUQ   | 133.169 | 4.023            |
| BINBAE   | 133.66  | 4.39             | HYZCZN   | 133.414 | 4.346            | UCUJIO   | 133.169 | 4.017            |
| AYIFUL   | 133.654 | 4.041            | TAYQIU   | 133.414 | 4.007            | JOFDUG   | 133.161 | 4.106            |
| NAZZOE   | 133.652 | 4.109            | DEJLIO   | 133.411 | 4.239            | UJAZAG   | 133.159 | 4.16             |
| ROPGIO   | 133.648 | 4.133            | UTEKAG   | 133.402 | 4.151            | PUNQIZ   | 133.157 | 4.126            |
| FEQVEE   | 133.647 | 4.263            | HICLOV   | 133.401 | 3.978            | MIVDEB   | 133.156 | 3.739            |
| HETDIT   | 133.629 | 3.915            | NOVQOH   | 133.4   | 4.08             | BUYBED   | 133.153 | 3.641            |
| FAHJAB   | 133.625 | 3.395            | HIYNIN   | 133.398 | 3.797            | ESOUYU   | 133.15  | 4.105            |
| AHOFUZ   | 133.621 | 3.981            | BEGZOE   | 133.38  | 3.984            | FOCLUH   | 133.149 | 3.168            |
| WERLOV   | 133.613 | 4.19             | LEJDUD   | 133.375 | 4.22             | LOQLAF   | 133.14  | 4.008            |

| Refcodes | ∠YZnO   | d <sub>ZnO</sub> | Refcodes | ∠YZnO   | d <sub>ZnO</sub> | Refcodes | ∠YZnO   | d <sub>ZnO</sub> |
|----------|---------|------------------|----------|---------|------------------|----------|---------|------------------|
| EQUYOU   | 133.61  | 3.984            | QENZAK   | 133.364 | 4.165            | AYISEH   | 133.134 | 4.043            |
| LUFVAM   | 133.61  | 3.962            | XIXPEA   | 133.363 | 3.81             | JAHNOY   | 133.132 | 4.054            |
| WEYLUK   | 133.606 | 4.195            | IGAVAN   | 133.355 | 4.012            | BIBGOJ   | 133.131 | 4.251            |
| MEYPIT   | 133.603 | 3.906            | ETUXUM   | 133.351 | 3.701            | XEJFIC   | 133.122 | 3.956            |
| NEWZEX   | 133.6   | 3.848            | OFUNOW   | 133.35  | 3.377            | QAHXUU   | 133.116 | 3.778            |
| OGOQOR   | 133.595 | 4.282            | CIBYAO   | 133.342 | 3.337            | BEMPIU   | 133.115 | 3.958            |
| IWUSAV   | 133.594 | 3.977            | FERYUY   | 133.34  | 3.95             | ODIRID   | 133.11  | 4.066            |
| OVIQER   | 133.58  | 4.192            | OFUNOW   | 133.337 | 3.976            | WEYMOE   | 133.108 | 3.898            |
| LAZBEU   | 133.578 | 4.158            | TATCUO   | 133.329 | 4.4              | KAMLER   | 133.107 | 4.166            |
| HIQVUZ   | 133.572 | 3.982            | DEZXIS   | 133.327 | 4.399            | FEQVEE   | 133.101 | 4.061            |
| BODBIF   | 133.566 | 4.077            | WOJJEK   | 133.299 | 4.395            | YEYFIT   | 133.098 | 4.118            |
| LUZDOB   | 133.566 | 3.995            | DEBSUZ   | 133.297 | 3.853            | LEJQAV   | 133.096 | 4.178            |
| NASJOI   | 133.563 | 3.765            | GICMAI   | 133.281 | 3.869            | IWUROI   | 133.094 | 3.992            |
| KAPWUV   | 133.557 | 4.063            | AGIWAQ   | 133.276 | 4.227            | POKQAK   | 133.093 | 4.044            |
| JISJUT   | 133.555 | 4.376            | ICOLUK   | 133.273 | 4.112            | UMOLAJ   | 133.092 | 3.912            |
| EPEYII   | 133.552 | 3.936            | UNOKIS   | 133.266 | 4.104            | TUBBAV   | 133.088 | 4.398            |
| PIWNIU   | 133.55  | 4.374            | ECOZUT   | 133.263 | 4.005            | ESAVEB   | 133.084 | 4.273            |
| TISPIV   | 133.547 | 4.248            | NEPPUT   | 133.262 | 3.789            | RAFZIJ   | 133.079 | 4.122            |
| TIHNON   | 133.539 | 4.169            | FEBYIW   | 133.262 | 3.963            | EDONOE   | 133.079 | 4.099            |
| KEBGIK   | 133.537 | 3.942            | JIVDUR   | 133.258 | 3.913            | LEHMUK   | 133.079 | 3.984            |
| JUKHAA   | 133.537 | 4.196            | ACACZM   | 133.252 | 4.185            | KAPWUV   | 133.072 | 4.229            |
| JAKPAN   | 133.532 | 4.067            | YOSZUC   | 133.243 | 4.209            | DUFKAT   | 133.068 | 3.963            |
| NUMTAS   | 133.532 | 4.081            | FIPRUR   | 133.239 | 4.361            | OGOWEN   | 133.066 | 4.278            |
| QARVIP   | 133.514 | 3.581            | GACWUG   | 133.237 | 3.698            | DUNXUH12 | 133.063 | 3.2              |
| EQUONIO  | 133.512 | 3.991            | IDOHES   | 133.236 | 3.807            | SOPNOB   | 133.056 | 4.113            |
| MAPMOJ   | 133.511 | 4.303            | XASDAZ   | 133.229 | 4.259            | KEYLEG   | 133.043 | 4.047            |
| COFCIL   | 133.504 | 4.091            | GOSNAG   | 133.226 | 4.022            | WECHOD   | 133.041 | 3.925            |
| CELGIL   | 133.503 | 4.277            | SIXJIV   | 133.226 | 4.279            | XUYGED   | 133.034 | 4.079            |
| XUQHOH   | 133.503 | 4.385            | OYEXIC   | 133.225 | 4.314            | MIPYIU   | 133.034 | 4.046            |
| PUPXEE   | 133.502 | 4.142            | KAPWUV   | 133.224 | 3.599            | WECHUJ   | 133.031 | 4.408            |
| FOWQEQ   | 133.023 | 4.247            | AWEJOE   | 132.738 | 3.986            | LEYSUG   | 132.457 | 3.839            |
| SETROB   | 133.021 | 4.054            | YITKEV   | 132.738 | 3.965            | MAKSOI   | 132.453 | 3.408            |
| IQUMIQ   | 133.015 | 4.239            | MOJKAY   | 132.737 | 4.327            | CIYJOK   | 132.452 | 4.373            |
| RESSUH   | 133.013 | 3.906            | MIGXOS   | 132.736 | 4.297            | UVUFAU   | 132.449 | 3.513            |
| OMEWOU   | 133.009 | 4.358            | GAYZOV   | 132.734 | 3.959            | CIJXID   | 132.447 | 4.297            |
| XAVKEN   | 133.006 | 4.047            | XAWNAK   | 132.731 | 3.909            | RUZQEI   | 132.444 | 4.182            |
| OGUBAV   | 133.005 | 3.83             | LEJQAV   | 132.73  | 3.45             | WIYCAL   | 132.443 | 3.902            |
| LUZDOB   | 133.002 | 4.031            | NUJVAS   | 132.724 | 4.297            | NEPLIE   | 132.439 | 3.748            |
| QUJCUV   | 132.997 | 3.939            | ACACZM02 | 132.721 | 4.182            | WISZUTO1 | 132.435 | 4.368            |
| YEYFIT   | 132.992 | 4.179            | LAYTAJ   | 132.708 | 4.3              | NOLYIW   | 132.431 | 4.166            |
| NOBYIO   | 132.982 | 4.195            | LEJQAV   | 132.697 | 3.99             | BEMPIU   | 132.428 | 4.267            |
| HAGMAG   | 132.97  | 4.104            | HOWQOA   | 132.69  | 3.952            | CUBYIJ   | 132.413 | 4.19             |
| CIWBUH   | 132.97  | 4.154            | NACZIE   | 132.688 | 3.907            | YEVVOL   | 132.41  | 3.74             |
| LERNAZ   | 132.962 | 4.185            | WARCOJ   | 132.682 | 4.354            | IPIJEY   | 132.406 | 4.402            |
| RAMGES   | 132.954 | 4.386            | HEFRES   | 132.669 | 4.144            | MAPNAW   | 132.396 | 4.284            |
| DUNXUH13 | 132.947 | 3.202            | SEZMIW   | 132.652 | 3.987            | ICUPUV   | 132.392 | 4.026            |
| UZOCUK   | 132.945 | 3.526            | DAXXOR   | 132.649 | 3.706            | DEFGIG   | 132.368 | 4.109            |
| WALBOC   | 132.936 | 4.227            | OFUGAY   | 132.646 | 4.052            | AHOFUZ   | 132.368 | 3.953            |
| XELTOZ   | 132.933 | 3.728            | TABSIA   | 132.644 | 4.162            | YEJXOC   | 132.367 | 4.305            |
| XOHNEO   | 132.928 | 4.195            | BOFVAU   | 132.63  | 4.306            | IKEMUI   | 132.332 | 4.048            |
| CUBWIG   | 132.928 | 4.093            | EQERUP   | 132.629 | 4.089            | ALELAG   | 132.331 | 4.081            |
| VARZEV   | 132.924 | 4.017            | KIRQIP   | 132.628 | 4.405            | IWURAU   | 132.313 | 3.974            |
| JAHNUE   | 132.921 | 4.104            | EBEZEU   | 132.624 | 4.05             | TIVJIT   | 132.302 | 4.071            |
| QORKIR   | 132.916 | 4.037            | IZAVEK   | 132.623 | 4.081            | BUZVOI   | 132.298 | 4.187            |
| QEVSOC   | 132.901 | 4.209            | SORBOQ   | 132.622 | 4.236            | VUDPIW   | 132.276 | 4.269            |
| LEJQAV   | 132.893 | 4.26             | HETWAF   | 132.614 | 4.171            | MAGBAZ   | 132.267 | 3.924            |
| OTIVUJ   | 132.886 | 4.206            | OSAXIQ   | 132.611 | 3.657            | ICUPUV   | 132.244 | 4.126            |
| EBEZOE   | 132.883 | 4.134            | FEDYEU   | 132.59  | 3.95             | EWUYAY   | 132.234 | 4.101            |
| OYOWIL   | 132.873 | 4.277            | URORAX   | 132.585 | 3.649            | RETDZ    | 132.233 | 4.351            |

| Refcodes | ∠YZnO   | d <sub>ZnO</sub> | Refcodes | ∠YZnO   | d <sub>ZnO</sub> | Refcodes | ∠YZnO   | d <sub>ZnO</sub> |
|----------|---------|------------------|----------|---------|------------------|----------|---------|------------------|
| EBEZEU   | 132.871 | 4.179            | NARKEA   | 132.578 | 4.125            | XARFOP   | 132.231 | 4.407            |
| XEQNOX   | 132.868 | 4.163            | TIRTAQ   | 132.577 | 4.372            | VEHLUQ   | 132.225 | 4.209            |
| KIBZAX   | 132.866 | 4.094            | KEQJEX   | 132.572 | 4.163            | LOPFIH   | 132.223 | 4.004            |
| GIQZEP   | 132.861 | 4                | MIXWUO   | 132.563 | 4.075            | LETMOO   | 132.219 | 4.374            |
| FAVPEA   | 132.852 | 4.226            | VIBJEW   | 132.56  | 4.2              | QUXVUB   | 132.215 | 3.909            |
| NUCCEW   | 132.825 | 4.1              | IYOBUV   | 132.551 | 3.83             | OFOPOP   | 132.213 | 4.105            |
| SADFAH   | 132.825 | 4.399            | HEJMOC   | 132.544 | 3.926            | VUDXAW   | 132.205 | 4.229            |
| QURBOX   | 132.818 | 4.189            | QEPRUC   | 132.539 | 4.179            | DEZXIS   | 132.202 | 4.066            |
| XEQNOX   | 132.817 | 4.295            | IZAVEK01 | 132.535 | 4.071            | FAFROW   | 132.197 | 3.704            |
| XOZKAY   | 132.816 | 3.667            | QOYSEF   | 132.526 | 4.215            | KUJZAT   | 132.193 | 4.131            |
| NANZIM   | 132.815 | 4.381            | LMETZN01 | 132.509 | 4.298            | UGUQUJ   | 132.18  | 4.218            |
| LOKLOM   | 132.811 | 3.912            | WICJAT   | 132.507 | 4.367            | UPURII   | 132.18  | 4.238            |
| TIQBEB   | 132.807 | 4.293            | KAPBEJ   | 132.498 | 4.278            | TESNUC   | 132.174 | 4.142            |
| QARVIP   | 132.797 | 3.855            | AYISEH01 | 132.492 | 4.332            | DUWGIN   | 132.155 | 3.837            |
| SESFAY   | 132.795 | 4.062            | IVOXEX   | 132.492 | 4.253            | FIPRUR   | 132.154 | 4.376            |
| CIMDAF   | 132.783 | 3.828            | ENEYAA   | 132.482 | 3.898            | IQUMIQ   | 132.147 | 4.072            |
| PIPKIK   | 132.765 | 4.157            | SOCSEI   | 132.475 | 4.25             | PEZLOY   | 132.142 | 4.096            |
| HAGHII   | 132.764 | 3.339            | IXACUF   | 132.469 | 3.977            | KEPGOF   | 132.137 | 3.93             |
| APANUC   | 132.76  | 4.207            | VIRNUG   | 132.465 | 3.85             | VUDQET   | 132.128 | 4.261            |
| DONPAY   | 132.739 | 3.836            | DEHFUR01 | 132.461 | 4.175            | EWUXUR   | 132.126 | 4.115            |
| MUZROP   | 132.122 | 4.198            | HUKSAK   | 131.858 | 3.566            | MCYSZN   | 131.494 | 4.134            |
| MOSPAL   | 132.12  | 4.278            | DACCAO   | 131.844 | 4.123            | JUCKIE   | 131.49  | 4.147            |
| PUDBIB   | 132.117 | 4.292            | JAIBOO   | 131.84  | 4.278            | RATZET   | 131.49  | 3.997            |
| VUDPUI01 | 132.098 | 4.248            | ZOCFAB   | 131.831 | 3.873            | RUZPOR   | 131.484 | 4.069            |
| UCUJIO   | 132.095 | 4.081            | IWURUO   | 131.812 | 4.002            | RAJHIU   | 131.482 | 4.377            |
| OVIPEQ   | 132.093 | 4.162            | XIDNOP   | 131.801 | 4.178            | DOCLAJ   | 131.473 | 4.079            |
| XASDIH   | 132.092 | 4.346            | SUWSUA   | 131.781 | 4.28             | FAXCUF   | 131.472 | 3.965            |
| UZANEP   | 132.09  | 4.234            | VUWCIA   | 131.775 | 4.203            | IYUVEF   | 131.462 | 4.133            |
| ACACZM01 | 132.088 | 4.265            | HAGJIK   | 131.774 | 3.974            | CAHJII   | 131.461 | 4.397            |
| RUGYIE   | 132.084 | 4.115            | XANVIR   | 131.766 | 4.226            | COFDAE   | 131.46  | 4.352            |
| NAKPUM   | 132.065 | 3.956            | JUGXER   | 131.753 | 3.574            | ASALIP   | 131.46  | 3.277            |
| VUDPUI   | 132.064 | 4.241            | KAPWUV   | 131.752 | 3.922            | UPUREE   | 131.457 | 4.221            |
| VUDPOC   | 132.062 | 4.248            | WISZUT   | 131.739 | 4.344            | XEGFOE   | 131.448 | 4.112            |
| KEWKIH   | 132.056 | 4.105            | QQQAZD01 | 131.716 | 4.06             | BEYLAW   | 131.431 | 4.299            |
| WALBOC01 | 132.048 | 4.176            | MOYNIA   | 131.708 | 3.951            | ESAVEB   | 131.429 | 3.869            |
| LMETZN01 | 132.043 | 4.323            | XEJFIC   | 131.703 | 4.023            | LMETZN   | 131.427 | 4.279            |
| DEZXUE   | 132.042 | 4.058            | KAMLER   | 131.701 | 4.27             | QUXVUB   | 131.424 | 4.059            |
| TATPUC   | 132.026 | 3.672            | AZAQOJ   | 131.698 | 3.845            | YITKEV   | 131.422 | 4.181            |
| QIBNOE01 | 132.019 | 4.013            | QIBNOE   | 131.681 | 4.01             | YITKEV   | 131.421 | 4.101            |
| KUJNUB   | 132.015 | 4.162            | WICJAT   | 131.679 | 4.27             | XIVMAT   | 131.42  | 4.175            |
| IPAPEU   | 132.007 | 4.071            | VUDQET01 | 131.677 | 4.214            | HEJMOC   | 131.411 | 3.967            |
| PUDBUN   | 132.004 | 4.375            | FASWED   | 131.677 | 4.179            | SAEDZN11 | 131.411 | 3.491            |
| IFIZOM   | 132.002 | 3.937            | BEQSUL   | 131.672 | 4.304            | MUZHEV   | 131.406 | 4.061            |
| GASREA   | 131.986 | 4.141            | XECTEG   | 131.672 | 3.994            | TOHYUM   | 131.38  | 4.055            |
| GOBHUC   | 131.974 | 4.076            | JANLUF   | 131.665 | 4.212            | OSAXIQ   | 131.379 | 4.331            |
| AYISEH   | 131.974 | 4.379            | OSACIX   | 131.654 | 4.195            | REJYIS   | 131.37  | 3.967            |
| RICNAU   | 131.971 | 4.376            | HOQJUS   | 131.654 | 4.386            | WICJAT   | 131.356 | 4.403            |
| MIKCER   | 131.969 | 4.252            | GICMEM   | 131.647 | 3.947            | TIRHEJ   | 131.353 | 4.172            |
| KIFNEV   | 131.968 | 3.685            | VUDQOD   | 131.639 | 4.246            | ZNGLUD02 | 131.347 | 3.276            |
| KEHTOJ   | 131.962 | 4.162            | RIWZUW   | 131.635 | 4.317            | HEBZAR   | 131.339 | 4.071            |
| FEXPOP   | 131.961 | 3.988            | QOFKIF   | 131.629 | 4.29             | LUZDOB   | 131.329 | 3.919            |
| ENEYAA   | 131.949 | 3.825            | LMETZN01 | 131.628 | 4.263            | JUGXER   | 131.326 | 4.264            |
| QIBNOE02 | 131.948 | 4.018            | MULQOA   | 131.613 | 3.804            | AGOTAS   | 131.325 | 4.051            |
| EFEBEA   | 131.944 | 3.958            | RIHJID   | 131.607 | 4.361            | PAQKUR   | 131.324 | 3.878            |
| LOVSAS   | 131.944 | 4.071            | SOKCOM   | 131.602 | 3.918            | VETNAK   | 131.317 | 3.978            |
| GAMFUW   | 131.941 | 3.88             | PIBBUA   | 131.593 | 4.202            | TUDGUX   | 131.314 | 3.805            |
| LUZDOB   | 131.937 | 3.935            | YEQRES   | 131.583 | 4.033            | BASZUU   | 131.311 | 4.058            |
| PETXAO   | 131.926 | 4.365            | OKUXUQ   | 131.579 | 4.121            | WIRCUX   | 131.305 | 3.929            |
| PUJVEY   | 131.925 | 4.002            | VIRNUG01 | 131.576 | 3.812            | PAHPIB   | 131.294 | 4.013            |

| Refcodes | ∠YZnO   | d <sub>ZnO</sub> | Refcodes | ∠YZnO   | d <sub>ZnO</sub> | Refcodes | ∠YZnO   | d <sub>ZnO</sub> |
|----------|---------|------------------|----------|---------|------------------|----------|---------|------------------|
| GAMFUW01 | 131.921 | 3.89             | XACMOD   | 131.575 | 3.974            | YEKVET   | 131.294 | 3.577            |
| USITUM   | 131.898 | 4.114            | HIYXOF   | 131.562 | 4.103            | XOZKAY   | 131.29  | 3.934            |
| UDOQAH   | 131.895 | 3.921            | MIQYER   | 131.539 | 4.144            | RAXJEH   | 131.288 | 4.137            |
| GOZCUT   | 131.894 | 4.076            | YEPKOW   | 131.533 | 3.94             | NIJZUC   | 131.276 | 3.959            |
| CIMJOA   | 131.879 | 3.951            | MIYMUC   | 131.532 | 4.239            | WALCET   | 131.271 | 4.163            |
| VIZPAY   | 131.864 | 4.107            | ETUCOM   | 131.529 | 3.745            | POMFIJ   | 131.266 | 4.241            |
| YELFIH   | 131.863 | 4.12             | LUKDOK   | 131.525 | 4.088            | ZOXTAJ   | 131.265 | 3.929            |
| MOJKAY   | 131.861 | 4.191            | MUZWAF   | 131.525 | 4.063            | KOTTEU   | 131.263 | 4.107            |
| XEHTUA   | 131.859 | 3.728            | LARQAA   | 131.514 | 4.009            | ESARAT   | 131.251 | 3.43             |
| XIYFUG   | 131.858 | 4.353            | KEYZAQ   | 131.496 | 3.889            | DEZYAL   | 131.236 | 4                |
| SAZXIB   | 131.229 | 3.772            | RUCMAE   | 130.884 | 4.311            | TUFHAE   | 130.536 | 3.984            |
| HIYNIN   | 131.226 | 3.78             | VIZNUQ   | 130.883 | 3.868            | LAWHAV   | 130.534 | 3.503            |
| CAQPUI   | 131.218 | 4                | IGAQIQ   | 130.879 | 4.342            | QEPRUC   | 130.53  | 4.362            |
| VEGMAX   | 131.215 | 4.084            | TUFHAE   | 130.879 | 4.34             | PIFFEQ   | 130.513 | 3.685            |
| DIYXAK   | 131.205 | 4.378            | IJOSEH   | 130.862 | 3.872            | GICLUB   | 130.51  | 3.967            |
| TEWZAY   | 131.199 | 4.281            | GADLUT   | 130.856 | 4.349            | TUYGAX01 | 130.51  | 3.944            |
| FEWREH   | 131.192 | 3.468            | GAYZIP   | 130.845 | 4.113            | RIHJID   | 130.506 | 4.358            |
| YUZQIV   | 131.18  | 3.632            | DEHFON   | 130.841 | 4.291            | SUPLAR   | 130.506 | 4.038            |
| UZAMUE   | 131.162 | 4.233            | YIMQES   | 130.841 | 4.309            | VOQVOO   | 130.499 | 3.718            |
| VUMVEH   | 131.154 | 4.104            | NENXUC   | 130.833 | 3.432            | LIZYUQ   | 130.489 | 4.058            |
| WOTREF   | 131.152 | 3.869            | CAQHOT   | 130.823 | 4.016            | NISBIC   | 130.479 | 3.813            |
| VEGLUQ   | 131.144 | 4.079            | EMOQIH   | 130.814 | 3.949            | NANZIM   | 130.45  | 4.398            |
| EBEZEU   | 131.13  | 3.94             | HOTFED   | 130.813 | 3.842            | DOPGUL   | 130.445 | 4.315            |
| SAJJIZ   | 131.127 | 3.808            | LEZGAA   | 130.797 | 4.221            | MOYTUR   | 130.444 | 3.905            |
| UZANAL   | 131.111 | 4.232            | HEBZEV   | 130.796 | 4.079            | WIHMIK   | 130.428 | 3.734            |
| EYERAB   | 131.11  | 4.388            | KESPIJ   | 130.794 | 4.375            | QEPRUC   | 130.422 | 4.083            |
| REJYIS01 | 131.107 | 3.963            | REGRIG   | 130.792 | 4.385            | GEYRIO   | 130.415 | 4.399            |
| MARDAN   | 131.102 | 4.251            | HECWOD   | 130.788 | 4.052            | IXACUF   | 130.403 | 4.186            |
| KEDRAO   | 131.097 | 3.9              | CISMAU   | 130.787 | 4.256            | YUSGID   | 130.386 | 4.223            |
| XAXZIG   | 131.086 | 4.218            | QEPROW   | 130.782 | 4.406            | UVAPIR   | 130.385 | 4.143            |
| IYUVAB   | 131.085 | 4.098            | MIKHEV   | 130.758 | 4.367            | VEHLUQ   | 130.385 | 4.134            |
| BONJOE   | 131.081 | 4.356            | YEKVET   | 130.74  | 3.483            | VUQXUD   | 130.383 | 4.267            |
| VUWCIA   | 131.075 | 4.135            | AFIRUD   | 130.738 | 3.937            | YUPKAW   | 130.379 | 3.923            |
| ZUSJII   | 131.038 | 4.214            | SAEDZN10 | 130.732 | 3.957            | UKEZIV   | 130.376 | 4.394            |
| GABWEN   | 131.029 | 4.193            | TEWZAY   | 130.718 | 3.928            | ZAHSUZ   | 130.354 | 3.677            |
| GOZGOT   | 131.018 | 3.907            | XIFYET   | 130.707 | 4.048            | BEMPIU   | 130.347 | 4.379            |
| WUZVIX   | 131.012 | 4.228            | ECURIF   | 130.697 | 4.295            | VADFIR   | 130.342 | 4.193            |
| HUPSIV   | 131.012 | 4.399            | HECWOD   | 130.694 | 3.879            | GOTLIM   | 130.334 | 3.929            |
| CAQGUY   | 131.01  | 4.343            | YULGUK   | 130.683 | 3.782            | ODEPAR   | 130.333 | 3.97             |
| GAYZIP01 | 131.01  | 4.138            | DEBSUZ   | 130.67  | 4.265            | UGUQUJ   | 130.329 | 4.056            |
| CUBWIG   | 131.003 | 4.328            | RIFNAW   | 130.659 | 4.196            | FESTOQ   | 130.294 | 4.171            |
| FEBFAU   | 131.001 | 3.537            | HACYEQ   | 130.653 | 3.944            | YOCXAR   | 130.294 | 4.183            |
| DUDQUR   | 130.99  | 4.246            | HUCHOD   | 130.648 | 4.196            | MUYWAF   | 130.293 | 4.41             |
| VUDWUP   | 130.988 | 4.196            | FAYDAN   | 130.646 | 4.327            | XAXBOP   | 130.291 | 4.117            |
| NOBYIO   | 130.978 | 4.389            | LIJQOM   | 130.642 | 4.279            | BOFGEL   | 130.29  | 3.704            |
| GADLUT01 | 130.956 | 4.349            | CEWBUC   | 130.633 | 4.264            | KIGBIL   | 130.289 | 4.019            |
| RAMDOZ   | 130.947 | 4.217            | TUYGAX02 | 130.628 | 3.945            | EBIKAB   | 130.286 | 4.117            |
| DATFUZ   | 130.946 | 4.285            | NEQDIW   | 130.612 | 3.987            | CAQHOT   | 130.284 | 3.939            |
| DEZXUE   | 130.943 | 4.317            | DUPRAI   | 130.607 | 4.385            | LIJQOM   | 130.282 | 3.969            |
| VETNAK01 | 130.937 | 3.947            | VEGSAF   | 130.601 | 4.2              | FAKTOD   | 130.266 | 4.198            |
| SAHFEN   | 130.933 | 4.085            | WIHMIK   | 130.599 | 4.086            | BOFVAU   | 130.255 | 3.996            |
| GUCYOT   | 130.93  | 3.669            | NEKWAB   | 130.591 | 4.123            | QEXVOH   | 130.245 | 3.88             |
| HECJAE   | 130.922 | 4.181            | DUPRAI   | 130.587 | 3.429            | WUPTEI   | 130.241 | 4.256            |
| ECUHAN   | 130.912 | 4.324            | BAVSOJ   | 130.582 | 4.176            | FAXCUF   | 130.23  | 4.076            |
| PENPAD01 | 130.91  | 4.04             | JESREF   | 130.551 | 4.165            | SOTBUZ   | 130.226 | 3.828            |
| WETKEM   | 130.907 | 4.113            | WEMZUJ   | 130.547 | 4.161            | UDOQAH   | 130.217 | 4.377            |
| TOHYUM01 | 130.901 | 4.046            | EVUJUD   | 130.542 | 3.713            | ASEDEK   | 130.207 | 4.16             |
| ZIGSUD   | 130.892 | 4.347            | BOPHAR   | 130.541 | 3.561            | GUPBOK   | 130.201 | 3.796            |
| BAFTAF   | 130.887 | 3.473            | TUYGAX   | 130.536 | 3.942            | YUBBOM   | 130.201 | 4.386            |

| Refcodes | ∠YZnO   | d <sub>ZnO</sub> | Refcodes | ∠YZnO   | d <sub>ZnO</sub> | Refcodes | ∠YZnO   | d <sub>ZnO</sub> |
|----------|---------|------------------|----------|---------|------------------|----------|---------|------------------|
| ZEPPUJ   | 130.198 | 4.408            | KAKFEL   | 129.805 | 3.843            | RICNAU   | 129.493 | 4.074            |
| RUZQOS   | 130.196 | 4.06             | JUKHII   | 129.803 | 4.284            | DEZXUE   | 129.474 | 4.154            |
| YEXJOB   | 130.194 | 4.239            | ASULAD   | 129.801 | 3.723            | EYERAB   | 129.473 | 4.058            |
| QEXVOH   | 130.191 | 4.087            | ILOROS   | 129.799 | 3.996            | ZAHSUZ   | 129.465 | 3.871            |
| PAHROG   | 130.188 | 3.852            | RUPSUS   | 129.798 | 3.758            | AWIGAQ   | 129.452 | 4.287            |
| WALBOC02 | 130.176 | 4.189            | PENQIK   | 129.769 | 3.982            | DUFKAT   | 129.451 | 3.314            |
| FASWED01 | 130.163 | 4.07             | FEBFAU   | 129.757 | 3.407            | LIQDOH   | 129.449 | 4.241            |
| HUPXUM   | 130.138 | 4.141            | AGAWUA   | 129.756 | 4.114            | HEXGUO   | 129.427 | 3.302            |
| YAVMIS   | 130.125 | 3.667            | SUWFEW   | 129.743 | 4.179            | ZOLXUT   | 129.422 | 4.341            |
| EWUXOL   | 130.118 | 4.174            | DOGMIW   | 129.741 | 4.25             | WEMWAP   | 129.422 | 3.187            |
| RORSOI   | 130.115 | 4.134            | NEPPED   | 129.74  | 3.868            | SECXUU   | 129.414 | 4.028            |
| LERVOV   | 130.108 | 4.352            | ILOROS   | 129.733 | 4.099            | HAGHII   | 129.402 | 3.628            |
| QUJCUV   | 130.102 | 4.384            | MIWJOU   | 129.727 | 3.934            | MEXRIT   | 129.397 | 4.337            |
| DIMKAN   | 130.098 | 3.955            | HOQZUJ   | 129.727 | 3.367            | AGUPUO   | 129.395 | 4.103            |
| YAXNIX   | 130.09  | 4.34             | AWIGEY   | 129.712 | 4.405            | YOJSUM   | 129.388 | 3.994            |
| LIDWAA   | 130.078 | 3.901            | TUMGAM   | 129.71  | 4.303            | MUSMAQ   | 129.386 | 4.346            |
| PAVZES   | 130.06  | 3.913            | GICTAN   | 129.704 | 4.057            | OPOBAX   | 129.377 | 3.442            |
| MIK CER  | 130.053 | 4.246            | UMAMED   | 129.691 | 4.126            | LECMOW   | 129.376 | 4.223            |
| OKUXUQ   | 130.05  | 4.374            | PATZUF   | 129.672 | 4.169            | FAWLAS   | 129.376 | 4.149            |
| QEPROW   | 130.03  | 4.134            | KAQGIV   | 129.671 | 4.042            | HOTNIQ   | 129.371 | 3.966            |
| XUNWIM   | 130.03  | 4.005            | CODVAV   | 129.666 | 3.998            | XOJXIE   | 129.364 | 4.193            |
| GUFQEE   | 130.015 | 4.38             | UXAMEN02 | 129.663 | 4.265            | ZOVSIM   | 129.363 | 4.064            |
| QELKUQ   | 130.007 | 4.221            | FEPPID   | 129.66  | 4.099            | XEMYUM   | 129.356 | 4.347            |
| FIDFUU   | 130.004 | 3.806            | LAVWIO   | 129.649 | 4.134            | GACWUG   | 129.355 | 4.182            |
| TUFTOF   | 129.989 | 4.22             | POLDOL   | 129.648 | 3.937            | GOSNAG   | 129.353 | 4.214            |
| ODIVUU   | 129.984 | 4.235            | NANZIM   | 129.64  | 4.047            | HUCHOD   | 129.35  | 4.077            |
| XOJGEL   | 129.963 | 4.148            | MATYIT   | 129.635 | 4.135            | FICBOM   | 129.344 | 4.285            |
| IKAVEX   | 129.957 | 4.185            | HUCLOH   | 129.622 | 4.165            | SAZXIB   | 129.329 | 3.781            |
| REJYIS01 | 129.945 | 3.817            | DUKBIV   | 129.618 | 4.032            | REPQEM   | 129.322 | 4.341            |
| OHUYIB   | 129.934 | 4.191            | ASEPIX   | 129.613 | 3.821            | XUNJEW   | 129.321 | 4.074            |
| HOQZUJ01 | 129.934 | 3.369            | AZIMIH   | 129.61  | 4.262            | QICTEC   | 129.321 | 4.096            |
| KAPWUV   | 129.932 | 3.653            | DAWQIE   | 129.605 | 4.335            | MAPNAW   | 129.316 | 4.277            |
| VEHLUQ   | 129.927 | 4.186            | QAYLEK   | 129.594 | 4.047            | RIHDUJ   | 129.316 | 4.236            |
| NANZIM   | 129.924 | 4.044            | ALUXEM   | 129.592 | 3.986            | OKUXUQ   | 129.296 | 4.368            |
| ZIDBUN   | 129.921 | 4.161            | YEQYEB   | 129.583 | 4.057            | MAGBIH   | 129.285 | 3.866            |
| VEZYOR   | 129.919 | 3.866            | SENJEB   | 129.582 | 4.214            | EQECOV   | 129.283 | 3.984            |
| LIGVAY   | 129.887 | 3.993            | NOHDOG   | 129.574 | 3.958            | JARLAT   | 129.273 | 3.966            |
| JEXQEJ   | 129.882 | 4.269            | JAVWOT   | 129.571 | 3.87             | BODBIF   | 129.262 | 4.309            |
| KEKHEP   | 129.881 | 3.884            | PUXNEB   | 129.562 | 4.086            | DEPYON   | 129.247 | 3.849            |
| HABRIN   | 129.872 | 4.179            | DIMKAN   | 129.551 | 3.865            | FACLI02  | 129.246 | 4.365            |
| DICDIG   | 129.862 | 4.347            | FOZGIN   | 129.55  | 4.334            | SIJREJ   | 129.245 | 4.03             |
| ICOLUK   | 129.858 | 4.056            | NOCGUH   | 129.549 | 4.082            | HATCEN   | 129.242 | 3.987            |
| WENPIO   | 129.855 | 3.852            | EBIKAB   | 129.544 | 4.104            | QUJZAZ   | 129.221 | 4.007            |
| OJUHUV   | 129.847 | 4.083            | PUXNEB01 | 129.538 | 4.073            | ROYTIL   | 129.22  | 3.894            |
| CISWOR   | 129.847 | 4.003            | COMVIK   | 129.522 | 4.233            | UMAWOV   | 129.219 | 3.972            |
| SIDHET   | 129.842 | 4.225            | FEKWUP   | 129.522 | 4.259            | AZAQOJ   | 129.205 | 4.108            |
| AHOMUH   | 129.831 | 4.343            | XUYVAS   | 129.518 | 3.722            | IGAQEM   | 129.204 | 4.299            |
| EQEFOW   | 129.83  | 4.295            | POLKIL   | 129.515 | 4.117            | MEPXL    | 129.186 | 3.832            |
| PENPAD   | 129.808 | 3.965            | QELKUQ   | 129.498 | 4.24             | FIDFUU   | 129.178 | 3.656            |
| UMOVIC   | 129.177 | 4.156            | FOJWAE   | 128.815 | 4.12             | FASWED01 | 128.473 | 4.136            |
| IHALUB   | 129.175 | 4.334            | EYERAB   | 128.811 | 4.356            | LIGVAY   | 128.468 | 4.268            |
| YAXNIX   | 129.141 | 4.359            | KAPWUV   | 128.81  | 4.041            | NIXKEM   | 128.465 | 3.889            |
| TIVJIT   | 129.141 | 3.975            | XIVMAT   | 128.809 | 4.363            | TIBQAA   | 128.44  | 4.358            |
| HESPOK   | 129.135 | 4.193            | ZOXTAJ   | 128.803 | 3.74             | PALHUG   | 128.431 | 4.183            |
| HESPOK10 | 129.135 | 4.193            | QEXVOH   | 128.802 | 4.12             | ALUXEM   | 128.43  | 3.987            |
| ASUXUJ   | 129.134 | 4.161            | IYUVOP   | 128.798 | 4.129            | KAPWUV   | 128.411 | 4.13             |
| MIKNEA   | 129.13  | 4.11             | HALGUZ   | 128.798 | 4.117            | YUKKIY   | 128.408 | 4.205            |
| DAYPUQ   | 129.12  | 4.226            | DAWQOK   | 128.797 | 4.221            | YUKKIY10 | 128.408 | 4.205            |
| HUVJAL   | 129.11  | 3.656            | AFUWEG   | 128.796 | 4.238            | DEZXIS   | 128.408 | 4.144            |

| Refcodes | ∠YZnO   | d <sub>ZnO</sub> | Refcodes | ∠YZnO   | d <sub>ZnO</sub> | Refcodes | ∠YZnO   | d <sub>ZnO</sub> |
|----------|---------|------------------|----------|---------|------------------|----------|---------|------------------|
| QEHAZ    | 129.109 | 3.957            | NEJGER   | 128.791 | 3.823            | ALUXEM   | 128.406 | 4.117            |
| QOMFEF   | 129.101 | 4.145            | YETJIR   | 128.787 | 4.056            | UFEBIT01 | 128.399 | 4.122            |
| XEGTEM   | 129.091 | 4.09             | XOQZUZ   | 128.776 | 4.163            | JEBTOA   | 128.392 | 4.213            |
| LADFUT   | 129.082 | 4.092            | SOCGOJ   | 128.768 | 4.086            | IGUDUK   | 128.386 | 4.163            |
| FUPQOW   | 129.078 | 4.142            | IQUMIQ   | 128.765 | 4.235            | AGUPUO   | 128.385 | 4.027            |
| MILWIP   | 129.066 | 4.093            | HIWHOL   | 128.764 | 4.067            | PEFEX    | 128.38  | 4.125            |
| FACLII   | 129.063 | 4.363            | EFUDOB   | 128.751 | 4.289            | OJITAC   | 128.378 | 4.19             |
| FOSQOV   | 129.059 | 4.323            | LIXTUJ   | 128.749 | 4.36             | LUWTOM   | 128.374 | 4.074            |
| NHBZZN10 | 129.045 | 4.332            | QICTEC   | 128.744 | 4.058            | HIQREF   | 128.368 | 3.907            |
| SIVXAY   | 129.043 | 3.76             | IJOSEH   | 128.738 | 4.268            | QUFFED   | 128.355 | 3.571            |
| NONNEM   | 129.037 | 4.14             | MOJKAY   | 128.733 | 4.223            | WAMXEQ   | 128.355 | 3.903            |
| LIDWAA   | 129.025 | 3.663            | JOHMAW   | 128.733 | 4.192            | AFEGAV   | 128.348 | 4.242            |
| KAPWUV   | 129.017 | 3.643            | POLRIU   | 128.73  | 4.318            | BAHTOT   | 128.347 | 4.176            |
| QOSKIS   | 129.017 | 4.236            | XICMUU   | 128.712 | 4.292            | NUFBIB   | 128.347 | 4.318            |
| DAXGUF   | 129.016 | 3.935            | BUYBAZ   | 128.709 | 3.814            | QUGWOF   | 128.347 | 4.069            |
| TOFSOW   | 129.009 | 4.175            | TIQBEB   | 128.7   | 4.138            | XIFWAM   | 128.34  | 4.277            |
| DUKBIV   | 129.005 | 3.907            | YETJIR   | 128.692 | 4.052            | UFEBIT   | 128.329 | 4.151            |
| MEXRIT   | 128.998 | 4.322            | TUFHAE   | 128.69  | 4.223            | CAVVAY   | 128.324 | 4.003            |
| ODUSEL   | 128.991 | 4.017            | IKAVEX   | 128.671 | 4.201            | OTOZOO   | 128.301 | 3.659            |
| VIQNOA   | 128.989 | 4.294            | VAJSUW   | 128.669 | 4.14             | BOFVAU   | 128.299 | 4.016            |
| HEBNEJ   | 128.972 | 4.121            | VIQMEO   | 128.663 | 3.703            | TIVJIT   | 128.279 | 3.955            |
| KAPWUV   | 128.971 | 4.056            | AWIGUK   | 128.66  | 4.263            | JAJBOO   | 128.27  | 3.607            |
| DOMYUC01 | 128.97  | 3.217            | OFUGAY   | 128.659 | 4.071            | MAPLIA   | 128.256 | 3.592            |
| IQIXAH01 | 128.97  | 3.959            | JAZKII   | 128.653 | 3.648            | FAFJIH   | 128.251 | 4.395            |
| UQEVUK   | 128.969 | 4.221            | BECGIO   | 128.651 | 4.239            | QOMFEF   | 128.214 | 4.41             |
| JAKPAN   | 128.953 | 4.172            | DAWQIE   | 128.644 | 4.189            | YAKBIY   | 128.212 | 4.345            |
| LIQDOH   | 128.933 | 4.24             | KOZJUH   | 128.633 | 4.188            | CAVVIG   | 128.204 | 3.609            |
| SACWEB   | 128.927 | 3.859            | KEJFAK   | 128.629 | 4.047            | MAHTAS   | 128.197 | 4.07             |
| VEHLUQ   | 128.915 | 3.825            | XOJXIE   | 128.628 | 4.276            | TUFHAE   | 128.192 | 4.187            |
| SEZMIW   | 128.911 | 4.333            | WIYFES   | 128.606 | 3.961            | JOHMAW   | 128.191 | 4.221            |
| NICWIF   | 128.908 | 4.152            | OYAPOV   | 128.565 | 3.809            | VUYBEX   | 128.184 | 3.821            |
| ODUSEL   | 128.905 | 4.022            | XOLCEH   | 128.565 | 3.971            | YAPNAI   | 128.145 | 4.142            |
| NENCOZ   | 128.904 | 3.917            | WIYCAL   | 128.538 | 4.088            | KUBNAX   | 128.139 | 3.879            |
| QAKMAQ   | 128.879 | 4.087            | VUQXOX   | 128.502 | 3.958            | MOQGAB   | 128.132 | 4.018            |
| ADOMAL   | 128.858 | 4.118            | XACGUD   | 128.498 | 4.127            | KOQJIL   | 128.129 | 3.028            |
| MIXWUO   | 128.838 | 4.321            | LENSON   | 128.494 | 4.373            | DEHFUR01 | 128.124 | 3.894            |
| JAYJOJ   | 128.824 | 4.152            | AXAVAZ   | 128.478 | 4.062            | GICTAN   | 128.102 | 4.145            |
| MOJKAY   | 128.821 | 4.271            | LUFXUI   | 128.478 | 3.922            | MEHBIL   | 128.101 | 3.668            |
| PEGVOQ   | 128.821 | 4.282            | FEPPEZ   | 128.477 | 4.093            | TAPRIO   | 128.07  | 3.993            |
| FUPQOW   | 128.069 | 4.152            | ROYYIQ   | 127.647 | 4.023            | HOPLOQ   | 127.283 | 4.186            |
| MOHLEB   | 128.063 | 3.761            | NABMAF   | 127.64  | 4.055            | ENEYEE   | 127.277 | 4.036            |
| ARAFOQ   | 128.049 | 4.138            | VIGBAQ   | 127.635 | 4.283            | IVODEC   | 127.275 | 4.172            |
| ADUROH   | 128.043 | 4.047            | DEHFIH   | 127.629 | 4.157            | RANQAA   | 127.267 | 3.856            |
| NOHDOG   | 128.036 | 3.987            | POLDOL   | 127.619 | 4.083            | RAMLIE   | 127.261 | 4.227            |
| ABEGOG   | 128.033 | 4.159            | BUZGUZ   | 127.61  | 3.982            | OHALAL   | 127.245 | 4.098            |
| RAXSIU   | 128.033 | 4.15             | HIVBAR   | 127.576 | 4.227            | RUZQAE   | 127.236 | 4.166            |
| WIQSAS01 | 128.01  | 4.317            | CAGLAB   | 127.575 | 4.139            | IJEXOL   | 127.23  | 4.251            |
| AFEGAV01 | 128.008 | 4.215            | MAGBIH   | 127.57  | 4.136            | ASEPIX   | 127.221 | 3.896            |
| KETTIN   | 128.007 | 4.309            | MEPXEL   | 127.563 | 4.252            | HAJBAW   | 127.191 | 4.292            |
| QEKNAZ   | 127.983 | 3.818            | LIMDOE   | 127.553 | 4.084            | ESYUG01  | 127.19  | 4.003            |
| JISMEG   | 127.972 | 3.072            | DEBSUZ   | 127.551 | 4.035            | YALKUR   | 127.163 | 4.367            |
| GIQZUF   | 127.962 | 3.99             | LIDWAA   | 127.548 | 3.721            | HEBNEJ   | 127.163 | 3.969            |
| QAYGAY   | 127.96  | 4.15             | KESPIJ   | 127.541 | 4.195            | PUKTUM   | 127.154 | 4.042            |
| QAKLEU   | 127.958 | 3.955            | AHISER   | 127.539 | 3.348            | YULGUK   | 127.129 | 3.821            |
| JETRUZ   | 127.956 | 4.196            | REXNUG   | 127.538 | 4.267            | WUMXIM   | 127.125 | 3.971            |
| MAPMOJ   | 127.924 | 4.276            | TOMKEN   | 127.537 | 4.085            | PIKYOY   | 127.119 | 4.148            |
| LIMNOL   | 127.915 | 4.222            | WEMXAP   | 127.523 | 4.027            | AFIRUD   | 127.116 | 3.876            |
| JAHNOY   | 127.903 | 4.158            | MIXXAV   | 127.509 | 4.079            | JETVUC   | 127.103 | 4.409            |
| OHUYIB   | 127.897 | 4.17             | JUKHAA   | 127.495 | 4.336            | TUDGUX   | 127.091 | 3.98             |

| Refcodes | ∠YZnO   | d <sub>ZnO</sub> | Refcodes | ∠YZnO   | d <sub>ZnO</sub> | Refcodes | ∠YZnO   | d <sub>ZnO</sub> |
|----------|---------|------------------|----------|---------|------------------|----------|---------|------------------|
| ABUQEW   | 127.872 | 3.956            | DEFHUT   | 127.491 | 4.123            | HOPLOQ   | 127.089 | 3.904            |
| XOMMET   | 127.87  | 4.315            | SAPNOO   | 127.488 | 4.279            | ESoyUG   | 127.087 | 4.039            |
| UTIPUK01 | 127.866 | 3.176            | BEPJOY   | 127.478 | 3.967            | GASSAX   | 127.071 | 4.187            |
| BOPZAJ   | 127.859 | 3.97             | UQETUI   | 127.47  | 4.091            | DOTHEB   | 127.07  | 4.095            |
| VIYJaq   | 127.858 | 3.997            | JAjPIU   | 127.467 | 3.952            | RUWMUT   | 127.068 | 4.122            |
| CEYSEF   | 127.857 | 4.09             | BAXQUN01 | 127.461 | 4.014            | MIXWIC   | 127.066 | 4.057            |
| RICKIA   | 127.829 | 4.111            | YAXNIX   | 127.46  | 4.222            | KIMWUA   | 127.063 | 4.109            |
| TEXRUM   | 127.828 | 4.212            | TAPREK   | 127.458 | 4.002            | RUWMED   | 127.052 | 4.231            |
| UGOQUE   | 127.827 | 4.362            | MULQOA   | 127.437 | 4.048            | NAPFAN   | 127.048 | 4.195            |
| YAXNIX   | 127.768 | 4.269            | MURQIA   | 127.434 | 3.459            | YELFED   | 127.047 | 4.131            |
| CEXSOO   | 127.766 | 3.877            | IWORET   | 127.424 | 4.224            | TOFSOW   | 127.041 | 4.26             |
| ZUFQEy   | 127.764 | 3.971            | JIQDUM   | 127.415 | 4.2              | BETTEC   | 127.032 | 4.357            |
| QOMFEF   | 127.755 | 4.175            | CEPJUE   | 127.411 | 4.196            | ULIBOG   | 127.031 | 4.057            |
| KEYLEG   | 127.754 | 3.968            | XAVKEN   | 127.409 | 3.983            | AVIMOI   | 127.022 | 3.857            |
| TOFSOW   | 127.741 | 4.235            | SIYSUQ   | 127.407 | 4.076            | MIXWOI   | 127.007 | 4.07             |
| BAXQUN   | 127.735 | 4.027            | TECGUF   | 127.406 | 4.158            | MALFOU   | 127.003 | 4.243            |
| TUJWIH   | 127.732 | 4.271            | USATIS   | 127.39  | 3.487            | QIDQUT   | 126.997 | 4.134            |
| ALUXEM   | 127.722 | 4.115            | SIHJEZ   | 127.387 | 4.193            | LALTAV   | 126.993 | 4.158            |
| RIWWOK   | 127.713 | 4.271            | QOMFEF   | 127.373 | 4.23             | LISXEU   | 126.993 | 4.291            |
| WUCFEI   | 127.709 | 4.406            | XODTAL   | 127.369 | 3.946            | CAPWAU   | 126.98  | 4.293            |
| WUPTAE   | 127.699 | 4.337            | WUDMAJ   | 127.36  | 3.85             | ROCWAH   | 126.975 | 4.186            |
| MAPLIA   | 127.697 | 4.231            | CAPWAU   | 127.345 | 4.4              | REFDEN   | 126.974 | 4.294            |
| TIMQEM   | 127.691 | 4.068            | RAXNAH   | 127.333 | 4.148            | TAPREK   | 126.963 | 4.169            |
| PAHQAU   | 127.684 | 4.194            | IFABIA01 | 127.323 | 4.303            | LEQWIP   | 126.956 | 4.292            |
| NOXBek   | 127.683 | 4.21             | DEZXIS   | 127.318 | 4.038            | TAPRIO   | 126.938 | 4.17             |
| MEJMAT   | 127.666 | 3.845            | ESoyUG   | 127.315 | 3.969            | EDANOM   | 126.936 | 3.86             |
| FIKNIX   | 127.662 | 3.94             | KUBNAX   | 127.309 | 3.921            | FAHMIM   | 126.935 | 3.979            |
| LEDLaj   | 127.66  | 4.085            | BECSEK   | 127.301 | 3.857            | MOJSUA   | 126.933 | 4.16             |
| DUGYOU   | 127.659 | 4.369            | IFABIA03 | 127.301 | 4.3              | MIXWEY   | 126.913 | 4.056            |
| GIXDOH   | 126.909 | 4.141            | RUNSOI   | 126.461 | 4.158            | CABPAA   | 125.904 | 3.938            |
| POGMIK   | 126.903 | 4.035            | GIKRIF   | 126.428 | 4.32             | KADSEP   | 125.903 | 3.951            |
| BICJEG   | 126.897 | 4.002            | EBALAY   | 126.427 | 4.224            | DEHFUR   | 125.899 | 3.935            |
| TOFSOW   | 126.894 | 4.07             | MOSNEN   | 126.418 | 4.05             | GECXUH01 | 125.879 | 4.115            |
| KUKXAS   | 126.893 | 4.15             | WENWUI   | 126.418 | 3.698            | TEFQIE   | 125.863 | 4.146            |
| QALHET   | 126.891 | 4.404            | XEBSIG   | 126.416 | 4.121            | MACHIJ   | 125.863 | 4.145            |
| QAHHEP   | 126.876 | 4.323            | ICOLUK   | 126.391 | 4.258            | OFURAK   | 125.862 | 3.966            |
| ASUXOD   | 126.87  | 4.22             | OZOQAX   | 126.383 | 4.223            | GECXUH   | 125.838 | 4.107            |
| PESYIV   | 126.862 | 4.4              | OHUQAJ   | 126.371 | 4.075            | ESIWEK   | 125.817 | 4.373            |
| REPQEM   | 126.847 | 4.358            | SOKFUW   | 126.367 | 4.333            | ETOJII   | 125.806 | 4.35             |
| UTEKAG   | 126.838 | 4.207            | DEZYAL   | 126.35  | 4.352            | WAMZAN   | 125.765 | 4.141            |
| KUKXAS   | 126.835 | 4.28             | SAPNOO   | 126.346 | 3.575            | IWORET01 | 125.761 | 4.235            |
| DEHFUR   | 126.834 | 3.805            | IZAZAL   | 126.34  | 4.279            | MUYCOB   | 125.76  | 4.392            |
| FASWED   | 126.827 | 4.011            | DAXGUF   | 126.333 | 4.086            | POKQEO   | 125.751 | 3.989            |
| HAWWAE   | 126.814 | 4.134            | UDOQAH   | 126.304 | 4.087            | UTIPUK01 | 125.75  | 3.275            |
| AWIGIY   | 126.811 | 3.987            | GLYZNS10 | 126.302 | 4.078            | LERVov   | 125.749 | 4.128            |
| MIMRAB   | 126.799 | 4.308            | FIRPOO   | 126.292 | 4.052            | LUMCED   | 125.694 | 3.839            |
| KEKHEP   | 126.774 | 4.044            | QUFGII   | 126.29  | 4.197            | DEHFUR01 | 125.693 | 3.754            |
| IKEYAA   | 126.747 | 4.21             | ECEZEV   | 126.282 | 4.035            | FERFIU   | 125.686 | 4.286            |
| MIMRAB02 | 126.746 | 4.314            | SIJREJ   | 126.281 | 3.92             | DURMAF   | 125.685 | 4.305            |
| UMAVOW   | 126.745 | 4.34             | FAXCUF   | 126.267 | 3.989            | XIRFEK   | 125.684 | 3.818            |
| VIVDUB   | 126.733 | 3.543            | QEXJAF   | 126.263 | 4.304            | HOXMIQ   | 125.682 | 4.021            |
| GUJFIB   | 126.726 | 4.355            | LOQLAF   | 126.261 | 3.715            | CITTUW   | 125.657 | 4.317            |
| PUWKUP   | 126.724 | 3.837            | LACGAA   | 126.211 | 4.206            | NIQSUD   | 125.646 | 3.717            |
| YIHLOS   | 126.711 | 4.283            | LUMCIH   | 126.184 | 3.852            | WARCAV   | 125.63  | 4.32             |
| KUBNAX   | 126.707 | 4.158            | DEKCEF   | 126.169 | 4.09             | UGUQUJ   | 125.63  | 4.268            |
| IGOPAW   | 126.702 | 4.059            | AZUCIH   | 126.168 | 4.383            | LIMGOF   | 125.621 | 4.227            |
| TERQEM   | 126.661 | 4.097            | XODTAL   | 126.161 | 3.87             | QIPLAE   | 125.616 | 4.124            |
| JOHLOJ   | 126.648 | 4.167            | CIYJOK   | 126.157 | 4.126            | YEKVAP   | 125.611 | 3.643            |
| IFABIA02 | 126.648 | 4.325            | LODNOK   | 126.14  | 4.034            | ORETAH   | 125.593 | 4.206            |

| Refcodes | ∠YZnO   | d <sub>ZnO</sub> | Refcodes | ∠YZnO   | d <sub>ZnO</sub> | Refcodes | ∠YZnO   | d <sub>ZnO</sub> |
|----------|---------|------------------|----------|---------|------------------|----------|---------|------------------|
| JUZQAY   | 126.635 | 4.283            | XIMWAS   | 126.132 | 3.882            | QOMFEF   | 125.588 | 4.407            |
| QEXMEO   | 126.633 | 4.02             | BOHYED   | 126.122 | 4.174            | TAYBII   | 125.586 | 4.208            |
| KAWXUB   | 126.618 | 3.947            | ALUWIQ   | 126.122 | 4.112            | QUZWEO   | 125.577 | 4.232            |
| XECTEG   | 126.618 | 4.109            | LIWXEV   | 126.116 | 3.756            | AXOTEP   | 125.575 | 3.918            |
| WEXFIQ   | 126.611 | 4.406            | AHOMUH   | 126.105 | 4.408            | UGADIP   | 125.569 | 3.839            |
| LEZGAA   | 126.608 | 4.23             | KUHCIC   | 126.096 | 4.019            | SEBBAF   | 125.566 | 4.341            |
| MIMRAB01 | 126.6   | 4.307            | MAPMUP   | 126.084 | 4.312            | AJOVUS   | 125.528 | 4.122            |
| OHIYEL   | 126.588 | 4.363            | YEPKUC   | 126.06  | 4.062            | NEPWIO   | 125.519 | 4.212            |
| NIJTIJ   | 126.58  | 4.322            | OBUMUU   | 126.06  | 4.242            | QAHHEP   | 125.505 | 4.289            |
| QAYGAY   | 126.568 | 3.658            | PAHROG   | 126.046 | 4.088            | MOJKAY   | 125.501 | 4.265            |
| TIRHEJ   | 126.55  | 4.073            | ALONEU   | 126.043 | 4.319            | YAKBIY   | 125.485 | 4.029            |
| NABMAF   | 126.547 | 3.961            | HUVJAL   | 125.985 | 4.361            | OSACIX   | 125.472 | 4.373            |
| XOVBAL   | 126.534 | 4.183            | TERQEM   | 125.983 | 4.068            | HEVSEI   | 125.467 | 4.055            |
| QUKRAS   | 126.53  | 4.291            | OBUMUU   | 125.942 | 3.991            | GUTZAX   | 125.46  | 4.154            |
| ZAQXEX   | 126.521 | 4.379            | RIDWUX   | 125.941 | 4.058            | GECXUH02 | 125.447 | 4.092            |
| MODHOD   | 126.507 | 4.014            | POWDOV   | 125.931 | 4.191            | VIRLAK   | 125.41  | 4.262            |
| JESREF   | 126.505 | 4.058            | LEBHUY   | 125.929 | 4.29             | GUTZAX01 | 125.405 | 4.15             |
| ICOLUK   | 126.485 | 4.151            | GIKQEA   | 125.916 | 4.266            | EBEZEU   | 125.4   | 4.214            |
| VOQDEL01 | 126.464 | 3.776            | GECXUH03 | 125.909 | 4.104            | OKUXUQ   | 125.393 | 4.292            |
| DOHPAT   | 125.368 | 3.522            | NENCOZ   | 124.843 | 3.983            | ETIDOD   | 124.303 | 4.386            |
| KELTUR   | 125.361 | 3.738            | MIGXIM   | 124.811 | 4.314            | CISCEO   | 124.301 | 4.35             |
| LUKDOK   | 125.353 | 4.241            | QITRET   | 124.8   | 3.042            | DEZXIS   | 124.286 | 4.061            |
| GUTZAX   | 125.343 | 4.146            | FAFROW   | 124.775 | 3.974            | FECHIG   | 124.258 | 4.049            |
| FASWED   | 125.341 | 4.101            | REGRIG   | 124.746 | 3.506            | MUMTOD   | 124.235 | 4.014            |
| KIRMOR   | 125.326 | 4.145            | KASQUS   | 124.739 | 3.99             | HALGUZ   | 124.234 | 3.9              |
| UKEHOJ   | 125.319 | 3.739            | MIGNUN   | 124.711 | 4.081            | TOFSOW   | 124.202 | 4.184            |
| IKEYAA   | 125.312 | 4.253            | ESIWEK   | 124.711 | 3.999            | QOJYEV   | 124.2   | 3.913            |
| DEZXUE   | 125.31  | 4.089            | YAPNAI   | 124.706 | 4.24             | YAJYEO   | 124.187 | 3.974            |
| CEZVIO   | 125.303 | 4.246            | GUQTOB   | 124.686 | 4.023            | AHOMOB01 | 124.186 | 4.361            |
| UWEDOQ   | 125.299 | 4.008            | DUDQUR   | 124.679 | 4.271            | VOGSIW   | 124.177 | 4.254            |
| BIBGOJ   | 125.298 | 4.18             | FISDIY   | 124.672 | 4.031            | XIYGIV   | 124.165 | 4.22             |
| IWORET   | 125.296 | 4.287            | DAWQIE   | 124.661 | 4.236            | TIVJIT   | 124.142 | 4.058            |
| VAKTIO   | 125.295 | 3.759            | UWEDUW   | 124.66  | 3.97             | REYPIV   | 124.134 | 4.334            |
| WEYFIR   | 125.288 | 4.29             | OKOKEG   | 124.645 | 4.129            | BTCBZN   | 124.134 | 4.393            |
| CEPLUF   | 125.288 | 4.161            | XASCUQ   | 124.636 | 4.207            | BUQZOD   | 124.131 | 4.051            |
| FURDEB   | 125.235 | 3.953            | QOYSEF   | 124.626 | 4.344            | QIBNOE   | 124.126 | 4.149            |
| ACACZM02 | 125.202 | 4.33             | NEPLIE   | 124.626 | 3.968            | NEHFUD   | 124.122 | 3.995            |
| YUCKAJ   | 125.19  | 4.261            | RUWMED   | 124.623 | 4.34             | ROYTIL   | 124.102 | 3.98             |
| MAPNEA   | 125.166 | 4.31             | TEFKEV   | 124.615 | 4.153            | LESGEZ   | 124.081 | 3.885            |
| MAPNEA   | 125.163 | 4.311            | YIMKEM   | 124.606 | 3.98             | JUYROM   | 124.078 | 3.904            |
| ERIKOG   | 125.161 | 4.209            | CEXTAB   | 124.604 | 3.99             | FUNPOW   | 124.071 | 4.361            |
| FIKNIX   | 125.152 | 3.833            | LUPPEU   | 124.6   | 4.134            | LEWFAV   | 124.067 | 4.396            |
| ASIZAG   | 125.143 | 4.077            | VIBJIA   | 124.597 | 3.984            | DEZXIS   | 124.066 | 4.125            |
| LACGAA   | 125.138 | 4.238            | XIHBAR   | 124.597 | 4.111            | CEYSEF   | 124.061 | 3.955            |
| HUNMUA   | 125.121 | 3.592            | FAWLAS   | 124.596 | 3.732            | YAFJAS   | 124.059 | 4.35             |
| ACACZM   | 125.108 | 4.356            | KAYPUW   | 124.593 | 4.154            | DEZXUE   | 124.057 | 4.197            |
| FIDFUU   | 125.091 | 4.312            | UTEJUZ   | 124.592 | 4.302            | PIHYAI   | 124.038 | 4.117            |
| MOJKAY   | 125.091 | 4.318            | DEZXUE   | 124.543 | 4.105            | ESAVEB   | 124.038 | 4.089            |
| EMOTOQ   | 125.065 | 4.269            | LAYLAB   | 124.541 | 4.146            | ADOMAL   | 124.029 | 4.012            |
| QOCVIN   | 125.062 | 4.226            | LISZEU   | 124.51  | 4.231            | QIBNOE01 | 124.003 | 4.145            |
| JEXQEJ   | 125.057 | 4.281            | KOZJUH   | 124.501 | 4.075            | UJAZAG   | 123.983 | 4.336            |
| NARKEA   | 125.047 | 4.154            | HALGUZ   | 124.476 | 3.701            | DEZXIS   | 123.982 | 4.263            |
| TAHFOY   | 125.022 | 4.199            | WIMDOP   | 124.464 | 4.222            | FEDYEU   | 123.975 | 4.143            |
| QECVIH   | 125.018 | 4.128            | QOSCIM   | 124.463 | 4.255            | FUNPOW01 | 123.964 | 4.365            |
| WOLKUF   | 124.987 | 4.099            | FELBUU   | 124.45  | 4.383            | KAXHIE   | 123.957 | 4.139            |
| NALNIZ   | 124.981 | 4.173            | NEHGAK   | 124.448 | 3.983            | FAQFAI   | 123.953 | 4.095            |
| CIFBUQ   | 124.973 | 4.293            | ZEJXOE   | 124.429 | 3.847            | RASFID   | 123.95  | 3.874            |
| FAWLAS   | 124.962 | 3.955            | QARVIP   | 124.411 | 3.912            | FEDYEU   | 123.932 | 4.242            |
| KEPGOF   | 124.951 | 4.055            | LISZEU   | 124.41  | 4.126            | NEHFOX   | 123.912 | 4.008            |



| Refcodes | $\angle YZnO$ | $d_{ZnO}$ | Refcodes | $\angle YZnO$ | $d_{ZnO}$ | Refcodes | $\angle YZnO$ | $d_{ZnO}$ |
|----------|---------------|-----------|----------|---------------|-----------|----------|---------------|-----------|
| HAXJEX   | 124.947       | 4.39      | YOTVIO   | 124.392       | 3.942     | QIBNOE02 | 123.893       | 4.149     |
| XOZJOL   | 124.947       | 4.337     | QEMDOB   | 124.39        | 4.104     | KAYPUW   | 123.878       | 4.186     |
| VUKYAE   | 124.934       | 4.065     | PUFYAR   | 124.381       | 4.062     | VEHDER   | 123.874       | 4.214     |
| SENJEB   | 124.918       | 4.344     | ALONEU   | 124.335       | 4.024     | NEHFIR   | 123.842       | 4.015     |
| SOMKUC   | 124.912       | 4.077     | DUFKAT   | 124.329       | 3.571     | VIGBAQ   | 123.84        | 4.03      |
| HAHCIF   | 124.903       | 4.186     | ALUWIQ   | 124.322       | 4.146     | XOMHIQ   | 123.83        | 4.178     |
| QUCZUK   | 124.903       | 4.042     | CIFHIJ   | 124.316       | 4.236     | NEHFEN   | 123.825       | 4.02      |
| AHONIW   | 124.902       | 4.337     | ICUNUS   | 124.312       | 4.381     | FIKNIX   | 123.823       | 4.06      |
| DUBHEO   | 124.89        | 4.226     | DOKRIG   | 124.306       | 4.112     | JESQAA   | 123.823       | 4.142     |
| JESQAA01 | 123.823       | 4.142     | KAPWUV   | 122.965       | 4.119     | KAPWUV   | 122.373       | 4.046     |
| ICUNUS   | 123.777       | 4.383     | XOZKAY   | 122.943       | 4.354     | TUFHAE   | 122.372       | 4.095     |
| LOPGAA   | 123.747       | 3.957     | SIXJER   | 122.931       | 4.147     | AEPYZN   | 122.347       | 4.246     |
| MAKYUS   | 123.743       | 4.206     | SATHED   | 122.925       | 4.025     | YACSEC   | 122.297       | 4.115     |
| XEYSOM   | 123.686       | 4.371     | NUVXOT   | 122.916       | 3.883     | AGUJOC   | 122.268       | 3.975     |
| OXUWIQ   | 123.673       | 4.397     | OFUQUD   | 122.9         | 3.776     | NAPFIV   | 122.263       | 4.313     |
| OXUHOH   | 123.64        | 4.389     | MABMEI   | 122.898       | 4.175     | MOYTUR   | 122.226       | 4.231     |
| SISFOR   | 123.634       | 3.834     | VOGSIW   | 122.89        | 4.15      | KIFNEV   | 122.222       | 4.062     |
| HUMYOG   | 123.584       | 4.162     | XOLCEH   | 122.88        | 4.128     | XAXZIG   | 122.216       | 4.257     |
| OXUHOH01 | 123.584       | 4.393     | NEHDOV   | 122.838       | 4.093     | XUQZAK   | 122.198       | 4.048     |
| FEDYEU   | 123.577       | 4.365     | QEXJAF   | 122.824       | 3.984     | KEKXAB   | 122.167       | 4.166     |
| HOWVAR   | 123.565       | 4.14      | MIQYER   | 122.817       | 4.043     | PASFUN01 | 122.154       | 4.221     |
| WIGTEP   | 123.528       | 3.701     | CISWAD   | 122.814       | 4.072     | HOPTUC   | 122.145       | 4.14      |
| HUMYOG   | 123.509       | 4.275     | SATHIH   | 122.809       | 4.017     | CEVYIM   | 122.134       | 4.219     |
| WEXFIQ   | 123.509       | 4.341     | ITOBZ    | 122.807       | 3.934     | ZUTQIO   | 122.115       | 3.985     |
| ZONZAF   | 123.5         | 4.021     | SASQIP   | 122.798       | 4.011     | NAPHOD   | 122.113       | 4.292     |
| HUXDUC   | 123.477       | 4.226     | ACACZM01 | 122.791       | 4.365     | CEVYIM01 | 122.092       | 4.217     |
| WIRCUX   | 123.474       | 4.28      | HUPDUR   | 122.764       | 4.234     | MUZHAR   | 122.09        | 4.074     |
| LARQAA   | 123.461       | 4.383     | NOHFAU   | 122.742       | 4.133     | FEBFAU   | 122.045       | 4.388     |
| EBUBEL   | 123.457       | 4.283     | TOFSOW   | 122.723       | 4.278     | SIXJIV   | 122.037       | 4.377     |
| QAHVUS   | 123.442       | 4.334     | CIVQEG   | 122.718       | 4.3       | RIDWUX   | 122.029       | 4.381     |
| CIMJOA   | 123.438       | 4.093     | IJEDOR   | 122.712       | 4.067     | AXOTEP   | 122.007       | 3.879     |
| EYIPOS   | 123.43        | 4.033     | SASVIT   | 122.704       | 4.103     | NUCSOU   | 121.998       | 4.089     |
| MIK CER  | 123.412       | 4.147     | KASQUS   | 122.695       | 3.948     | RECKIX   | 121.985       | 4.115     |
| SIXJER   | 123.387       | 4.332     | FUFVIM01 | 122.694       | 4.172     | NAKTOM   | 121.984       | 4.134     |
| HATCEN   | 123.378       | 3.898     | SATHUT   | 122.693       | 4.076     | HOKQED   | 121.983       | 3.974     |
| XIHBEV   | 123.375       | 4.311     | TAQTOV   | 122.691       | 4.074     | ONIWEO   | 121.975       | 3.961     |
| SIXJIV   | 123.373       | 4.157     | OFABIG   | 122.681       | 4.228     | UWEDOQ   | 121.955       | 4.248     |
| UQEDIE   | 123.367       | 4.388     | ACACZM   | 122.667       | 4.143     | PIBLAQ   | 121.947       | 4.249     |
| FETJOE   | 123.356       | 4.281     | POWDOV   | 122.663       | 4.29      | NOHFAU   | 121.944       | 4.23      |
| NEHFAJ   | 123.337       | 4.052     | EXOFAZ   | 122.634       | 4.22      | PIBLAQ01 | 121.942       | 4.248     |
| SOQDAE   | 123.336       | 4.317     | BEGZOE   | 122.602       | 4.015     | IHEMUF   | 121.863       | 4.192     |
| FIDFUU   | 123.335       | 4.19      | UGOQIS   | 122.596       | 4.267     | TOFSOW   | 121.86        | 4.221     |
| ECUQAV   | 123.308       | 4.402     | VIRNUG01 | 122.575       | 4.3       | QAHHIT   | 121.853       | 4.151     |
| FETJOE01 | 123.306       | 4.28      | POLDOL   | 122.55        | 4.195     | GEGJUZ   | 121.852       | 4.256     |
| TESNUC   | 123.281       | 4.002     | JAIXOI   | 122.546       | 4.302     | WISZON   | 121.837       | 3.98      |
| XACGUD   | 123.274       | 4.07      | GUCQIH   | 122.546       | 4.329     | QAHVUS   | 121.81        | 3.827     |
| HAGJIK   | 123.261       | 4.25      | VIRXAX   | 122.528       | 3.98      | GUVSEW   | 121.769       | 3.865     |
| SATHON   | 123.246       | 4.029     | FAZCUH   | 122.514       | 4.309     | WIRLUH   | 121.757       | 4.385     |
| JOMGOK   | 123.221       | 4.169     | WUFBUV   | 122.506       | 4.07      | VIRNUG   | 121.751       | 4.022     |
| CUTQOY   | 123.201       | 4.256     | XEGQIM   | 122.499       | 4.223     | UWEDUW   | 121.742       | 4.257     |
| IQIZUD   | 123.199       | 4.171     | EBUBEL01 | 122.493       | 4.391     | MAKSUN   | 121.741       | 4.251     |
| MIHNOH   | 123.168       | 4.173     | EBOQEU   | 122.467       | 4.264     | MIWJOU   | 121.733       | 4.248     |
| LUWTEC   | 123.149       | 3.995     | IGAWET   | 122.464       | 4.359     | QOMFEF   | 121.731       | 4.307     |
| NEHDUB   | 123.11        | 4.064     | MOSNEN   | 122.451       | 4.159     | CUTQOY   | 121.676       | 4.196     |
| ACACZM01 | 123.092       | 4.301     | YIMKEM   | 122.423       | 4.168     | MUVVUW   | 121.668       | 3.965     |
| KAHBOO   | 123.054       | 4.162     | ACACZM02 | 122.416       | 4.142     | QUKRAS   | 121.657       | 4.006     |
| TAHFEO   | 123.044       | 4.245     | PASFUN   | 122.404       | 4.229     | EMOQIH   | 121.651       | 4.081     |
| QAHHEP   | 123.043       | 4.332     | QUJCUV   | 122.374       | 4.388     | NIPWIT01 | 121.635       | 4         |
| LARRUTO1 | 121.589       | 4.201     | BECKEC   | 120.574       | 4.044     | TETXEX   | 119.403       | 4.357     |

| Refcodes | ∠YZnO   | d <sub>ZnO</sub> | Refcodes | ∠YZnO   | d <sub>ZnO</sub> | Refcodes | ∠YZnO   | d <sub>ZnO</sub> |
|----------|---------|------------------|----------|---------|------------------|----------|---------|------------------|
| ONOHUV   | 121.58  | 4.198            | EWUYAY   | 120.561 | 4.344            | ACENIF   | 119.398 | 4.125            |
| OBUMUU   | 121.578 | 4.214            | OHUQAJ   | 120.503 | 4.259            | FEQVEE   | 119.397 | 4.151            |
| LARRUT   | 121.566 | 4.204            | VAXVUL   | 120.497 | 4.166            | KUBVOU   | 119.396 | 4.325            |
| FAWLAS   | 121.517 | 4.287            | EWUXUR   | 120.45  | 4.358            | CAVRAU   | 119.39  | 4.03             |
| NIPWIT   | 121.517 | 4.019            | HOQQEK   | 120.405 | 4.373            | DEZJUR   | 119.35  | 4.13             |
| KUBVOU   | 121.51  | 4.218            | WISZUT01 | 120.403 | 4.015            | XIZGAO   | 119.313 | 4.234            |
| LUMCED   | 121.503 | 4.203            | USATIS   | 120.391 | 4.236            | PUNQEV   | 119.304 | 4.336            |
| IFEYOH   | 121.478 | 4.345            | MUVVUW   | 120.377 | 3.969            | OZUNEF   | 119.293 | 3.828            |
| LARRUT02 | 121.458 | 4.2              | FAVPEA   | 120.374 | 4.311            | KEYLEG   | 119.266 | 4.368            |
| HUVJAL   | 121.447 | 4.309            | ASUBIZ   | 120.355 | 4.185            | SUWCEU   | 119.213 | 4.135            |
| KUBVOU   | 121.423 | 4.357            | OWABOE   | 120.326 | 4.235            | ZEFFEV   | 119.213 | 4.232            |
| DEKCEF   | 121.406 | 3.986            | QOMFEF   | 120.324 | 4.14             | DUYJOY   | 119.212 | 4.177            |
| LUMCIH   | 121.403 | 4.199            | FEBFIC   | 120.302 | 4.325            | WOJJEK   | 119.197 | 4.296            |
| KEPGOF   | 121.36  | 4.049            | HUDMOJ   | 120.264 | 4.271            | REWFAB02 | 119.148 | 4.349            |
| MEFWON   | 121.31  | 4.258            | AJAPEH   | 120.24  | 4.192            | HIXWAN   | 119.118 | 4.334            |
| ALOPAS   | 121.274 | 4.16             | PUNQIZ   | 120.23  | 4.367            | XUQHOH   | 119.044 | 4.359            |
| WIRHUD   | 121.246 | 3.527            | WISZUT   | 120.199 | 4.029            | AGOTAS   | 118.977 | 4.243            |
| OGIHIY   | 121.245 | 4.178            | MUVVUW   | 120.194 | 3.973            | WIWBUA   | 118.948 | 4.218            |
| XAKHUQ   | 121.24  | 4.251            | XIMWAS   | 120.182 | 4.269            | REWFAB   | 118.865 | 4.377            |
| ESASUN   | 121.197 | 4.152            | MUVVUW   | 120.175 | 3.941            | REWFAB01 | 118.843 | 4.389            |
| EQEROJ   | 121.197 | 4.137            | LUTXUT   | 120.164 | 4.275            | HURFUX   | 118.829 | 3.993            |
| GOJHUJ   | 121.197 | 4.055            | VEHDER   | 120.14  | 4.176            | XIZGAO   | 118.794 | 4.213            |
| OFUQUD   | 121.188 | 3.764            | PIJBAM   | 120.108 | 4.263            | XULFEQ   | 118.793 | 4.218            |
| RETBEZ   | 121.166 | 4.297            | ASIZAG   | 120.053 | 4.187            | AROGIA   | 118.789 | 3.804            |
| TUDGUX   | 121.158 | 4.134            | ICUBUE   | 120.041 | 4.273            | AJAPEH   | 118.767 | 4.354            |
| FUFVIM   | 121.158 | 4.286            | TEDSAX   | 120.012 | 4.311            | PUNQIZ   | 118.738 | 4.283            |
| ALOPAS01 | 121.071 | 4.169            | HURFOR   | 120.006 | 3.992            | QOMFEF   | 118.723 | 4.162            |
| REYPIV02 | 121.055 | 4.196            | VONMIU   | 120.004 | 4.366            | XUNWIM   | 118.683 | 4.238            |
| WAWGOQ   | 121.045 | 4.211            | VAJXAI   | 119.979 | 3.836            | OGIHIY   | 118.666 | 4.22             |
| ALOPAS02 | 121.043 | 4.156            | KOKBAO   | 119.914 | 3.941            | QITRET   | 118.651 | 4.133            |
| YILWUM   | 121.027 | 4.259            | NAHGUB   | 119.863 | 4.132            | ROVFEP   | 118.645 | 4.347            |
| MIFKOF   | 121.026 | 4.144            | CABPAA   | 119.826 | 4.226            | KOQJIL   | 118.626 | 3.643            |
| LECWOG   | 121.015 | 4.359            | VIQZAX   | 119.823 | 4.047            | ROVFEP   | 118.605 | 4.361            |
| LUGTAJ   | 120.992 | 4.243            | HEVCER   | 119.766 | 4.315            | GACWUG   | 118.605 | 4.255            |
| ULAJJO   | 120.983 | 4.24             | KIGBIL   | 119.691 | 4.392            | BAVYON   | 118.603 | 3.953            |
| MIBSUM   | 120.963 | 4.326            | AYIFUL   | 119.676 | 4.236            | ESIWEK   | 118.6   | 3.574            |
| RUGYIE   | 120.957 | 4.404            | VEGLUQ   | 119.674 | 4.358            | IGOPAW   | 118.594 | 4.2              |
| REYPIV01 | 120.909 | 4.223            | GATVAZ   | 119.661 | 4.269            | PIBHUF   | 118.572 | 4.197            |
| SIGLUP   | 120.853 | 4.147            | TATPUC   | 119.606 | 4.324            | ZONSIG   | 118.503 | 4.324            |
| TIWSEZ   | 120.852 | 4.107            | MOKZUJ   | 119.58  | 4.239            | ROVFEP   | 118.496 | 4.352            |
| LIRDAS   | 120.832 | 4.277            | PUGXOE   | 119.569 | 4.371            | KOJQOP   | 118.489 | 4.034            |
| HALGUZ   | 120.831 | 4.254            | OBUMUU   | 119.556 | 4.158            | ROVFEP   | 118.391 | 4.335            |
| BICJEG   | 120.81  | 4.102            | ROKSUI   | 119.546 | 4.138            | ROVFEP   | 118.367 | 4.364            |
| LORYEX   | 120.674 | 4.242            | VEGMAX   | 119.499 | 4.368            | XASDAX   | 118.348 | 4.314            |
| AGIWAQ   | 120.622 | 4.281            | HURFEH   | 119.484 | 3.924            | ROVFEP   | 118.329 | 4.361            |
| QIPLAE   | 120.619 | 4.172            | OHALAL   | 119.473 | 4.104            | HAWWAE   | 118.304 | 4.27             |
| CAHHOM   | 120.619 | 4.064            | ISENOK   | 119.456 | 4.375            | ROVFEP   | 118.218 | 4.343            |
| RAXNAH   | 120.58  | 4.07             | WEBRAZ   | 119.45  | 4.247            | REGROO   | 118.214 | 3.974            |
| POLKIL   | 118.139 | 4.08             | SATHED   | 115.396 | 4.037            | RORSEY   | 108.315 | 4.372            |
| ROVFEP   | 118.104 | 4.354            | ROMQAN   | 115.317 | 4.258            | DOYRUF01 | 107.981 | 4.171            |
| QOMFEF   | 117.987 | 4.138            | SATHUT   | 115.309 | 4.065            | COKBIQ   | 103.24  | 4.214            |
| LADTAO   | 117.95  | 3.469            | GUXJER   | 115.28  | 3.958            | USAHAZ   | 102.758 | 4.081            |
| EHAMEH   | 117.948 | 4.043            | EKOZUB   | 115.268 | 4.169            | MOSJUC   | 100.973 | 4.073            |
| KUBVOU   | 117.944 | 4.297            | QALHET   | 116.885 | 4.34             | JAJPIU   | 116.1   | 4.202            |
| WEKLOP   | 117.877 | 3.886            | CEZVIO   | 116.733 | 4.261            | NIYNUG   | 116.094 | 4.232            |
| QAYWUM   | 117.854 | 4.308            | HEJNAP   | 116.544 | 4.022            | HUXDUC   | 115.983 | 4.029            |
| GLYZNS10 | 117.668 | 4.325            | BABXEL   | 116.539 | 3.981            | SASQUB   | 115.814 | 4.083            |
| LAGROC   | 117.545 | 4.303            | WADZIL   | 116.534 | 4.313            | TATPUC   | 115.667 | 4.304            |
| UCECOU   | 117.373 | 4.346            | MULQOA   | 116.523 | 4.304            | SAPNOO   | 115.638 | 4.343            |

|        |         |       |          |         |       |        |         |       |
|--------|---------|-------|----------|---------|-------|--------|---------|-------|
| FAXCUF | 117.305 | 3.998 | AJOVUS   | 116.519 | 4.328 | PIJGUM | 115.568 | 4.283 |
| RIFNUQ | 117.225 | 4.184 | NETYUI   | 116.482 | 4.151 | KOHBEP | 115.529 | 4.151 |
| XUQHOH | 117.19  | 4.333 | CUMBUI   | 116.391 | 3.632 | GUXJAN | 115.529 | 3.969 |
| BAQHEG | 117.055 | 4.308 | BICJEG   | 116.106 | 4.307 | PIJGUM | 115.504 | 4.283 |
| MIXLAI | 115.445 | 4.188 | EWESAC   | 115.267 | 3.927 | BACMOJ | 113.611 | 4.357 |
| SATHIH | 114.52  | 4.072 | XICDOC   | 115.171 | 4.378 | HOWQOA | 113.432 | 4.168 |
| FAPJIT | 114.482 | 4.321 | ZODGIL   | 115.144 | 3.971 | ZUCHOX | 113.404 | 4.361 |
| RUGYIE | 114.39  | 4.389 | SASQOV   | 115.138 | 4.045 | PAGSUP | 112.911 | 4.152 |
| OMEBIS | 114.237 | 4.243 | KUJCIE   | 115.105 | 4.074 | NUHBOI | 112.519 | 4.014 |
| HEHVOI | 114.051 | 4.115 | SATHON   | 114.799 | 4.046 | ESIWEK | 112.169 | 3.854 |
| PUNQEV | 113.82  | 4.386 | FUMYUI   | 114.738 | 4.382 | NAMGAN | 111.854 | 3.905 |
| ICUBUE | 113.752 | 4.125 | HUPXUM   | 114.705 | 4.24  | FEBFAU | 111.621 | 4.041 |
| OPIFIE | 113.66  | 4.1   | UGOQIS   | 110.613 | 4.18  | PUNQIZ | 109.176 | 4.279 |
| PUNQIZ | 111.071 | 4.282 | AMOYIL   | 110.223 | 4.037 | DOYRUF | 108.656 | 4.176 |
| XEJKAB | 110.646 | 4.05  | DOYRUF02 | 109.443 | 4.104 |        |         |       |

## References

S1. Gaussian 16, Revision C.01, M. J. Frisch, G. W. Trucks, H. B. Schlegel, G. E. Scuseria, M. A. Robb, J. R. Cheeseman, G. Scalmani, V. Barone, G. A. Petersson, H. Nakatsuji, X. Li, M. Caricato, A. V. Marenich, J. Bloino, B. G. Janesko, R. Gomperts, B. Mennucci, H. P. Hratchian, J. V. Ortiz, A. F. Izmaylov, J. L. Sonnenberg, D. Williams-Young, F. Ding, F. Lipparini, F. Egidi, J. Goings, B. Peng, A. Petrone, T. Henderson, D. Ranasinghe, V. G. Zakrzewski, J. Gao, N. Rega, G. Zheng, W. Liang, M. Hada, M. Ehara, K. Toyota, R. Fukuda, J. Hasegawa, M. Ishida, T. Nakajima, Y. Honda, O. Kitao, H. Nakai, T. Vreven, K. Throssell, J. A. Montgomery, Jr., J. E. Peralta, F. Ogliaro, M. J. Bearpark, J. J. Heyd, E. N. Brothers, K. N. Kudin, V. N. Staroverov, T. A. Keith, R. Kobayashi, J. Normand, K. Raghavachari, A. P. Rendell, J. C. Burant, S. S. Iyengar, J. Tomasi, M. Cossi, J. M. Millam, M. Klene, C. Adamo, R. Cammi, J. W. Ochterski, R. L. Martin, K. Morokuma, O. Farkas, J. B. Foresman, and D. J. Fox, Gaussian, Inc., Wallingford CT, 2016.
